# Supplementary material for: Pas de deux: An Intricate Dance of Anther Smut and Its Host
Source: Oxford University Press journal article supplement (doi:10.1534/g3.117.300318), 2017-12-02
Supplement: 300318_tables2.xlsx [file 300318_tables2.xlsx]

## Sheet: Mvio_difExp_MI_difGene_1e5
GeneID	Mated_1	Mated_2	MI_8_1	MI_8_2	MI_9_1	MI_9_2	MI_10_1	MI_10_2	MILate_1	MILate_4	MILate_5	MI_FS_1	MI_FS_2	MI_FS_3	logFC_MI8vsMated	FDR_MI8vsMated	logFC_MI9vsMated	FDR_MI9vsMated	logFC_MI10vsMated	FDR_MI10vsMated	logFC_MILatevsMated	FDR_MILatevsMated	logFC_MIFSvsMated	FDR_MIFSvsMated	logFC_MI9vsMI8	FDR_MI9vsMI8	logFC_MI10vsMI8	FDR_MI10vsMI8	logFC_MILatevsMI8	FDR_MILatevsMI8	logFC_MIFSvsMI8	FDR_MIFSvsMI8	logFC_MI10vsMI9	FDR_MI10vsMI9	logFC_MILatevsMI9	FDR_MILatevsMI9	logFC_MIFSvsMI9	FDR_MIFSvsMI9	logFC_MILatevsMI10	FDR_MILatevsMI10	logFC_MIFSvsMI10	FDR_MIFSvsMI10	logFC_MILatevsMIFS	FDR_MILatevsMIFS
MVLG_01192	0.04	0	1	0	742.83	159.2	2147.15	618.13	342.37	898.67	717.83	0	13.77	4.62	NA	NA	14.02	1.436e-99	15.64	3.733e-128	14.53	4.636e-92	NA	NA	9.38014	1.15e-62	11.08	2.652e-86	10.0161	5.897e-51	NA	NA	1.603	9.818e-05	0.3906	0.3846	-5.542	7.348e-28	-1.19503	0.0007936	-7.146	2.377e-44	5.93817	3.789e-33
MVLG_05720	0.18	0.17	31.2	19.12	3530.39	2241.24	2669.58	4791.71	2097.52	2121.76	1754.73	59.72	786.51	204.7	NA	NA	13.78	4.095e-109	14.16	3.062e-116	13.33	1.826e-87	11.2	4.773e-31	6.75544	1.15e-62	7.115	3.423e-64	6.19043	2.18e-37	4.17205	7.696e-12	0.3689	0.9298	-0.5284	0.1903	-2.58	2.712e-11	-0.88254	0.01899	-2.955	2.171e-14	2.04252	3.749e-08
MVLG_03707	0.04	0.26	11.52	5.76	975.28	440.76	1636.41	795.25	144.85	558.68	499.96	0	103.46	19.4	5.878	4.944e-08	12.15	2.143e-108	12.91	4.826e-122	11.22	2.822e-82	8.536	2.929e-20	6.27506	1.844e-59	7.018	3.995e-67	5.26143	5.797e-30	2.62416	0.0002451	0.7527	0.2753	-0.9668	0.008	-3.652	1.226e-19	-1.70634	6.019e-07	-4.406	3.307e-27	2.68226	1.057e-12
MVLG_06129	1.38	1.05	3.39	0.67	204.43	174.75	379.48	415.55	100.29	266.07	183.05	0	48.39	49.54	0.8747	0.4151	7.358	1.971e-84	8.39	3.026e-96	7.127	5.236e-56	5.206	1.598e-23	6.45703	8.604e-47	7.48	5.417e-60	6.18379	2.086e-32	4.22978	2.635e-09	1.022	0.04519	-0.258	0.5757	-2.214	2.996e-08	-1.26972	0.0003413	-3.241	3.429e-16	1.94875	1.661e-07
MVLG_00622	64.82	54.54	55.28	59.31	1497.18	963.51	1603.24	1420.15	386.6	817.06	679.67	104.11	281.42	212.05	0.09112	0.8181	4.443	1.333e-46	4.722	1.713e-47	3.356	4.007e-20	2.036	1.384e-06	4.37835	1.732e-42	4.629	3.467e-42	3.20186	3.073e-16	1.90188	0.0002284	0.2692	0.9804	-1.109	0.001869	-2.469	8.18e-10	-1.36613	9.628e-05	-2.739	5.841e-12	1.34562	0.0008292
MVLG_02331	7.07	5.3	4.32	3.57	254.17	145.77	314.92	288.03	54.41	135.37	147.78	8.71	67.52	32.39	-0.5057	0.4477	5.081	2.954e-53	5.65	1.135e-59	4.091	1.58e-26	2.96	1.574e-10	5.58515	2.098e-41	6.138	7.077e-48	4.53237	3.795e-21	3.39474	1.185e-07	0.5606	0.6575	-1.012	0.00597	-2.184	1.516e-07	-1.56103	6.824e-06	-2.747	1.2e-11	1.15824	0.003799
MVLG_06792	4.18	5.45	11.05	4.01	332.32	195.98	731.28	504.66	54.86	133.88	120.54	61.3	26.78	32.45	0.776	0.2127	5.834	1.794e-63	7.036	3.724e-80	4.334	2.173e-28	2.86	6.576e-09	5.06601	1.29e-37	6.247	4.048e-54	3.49667	4.317e-14	2.01552	0.00335	1.192	0.009863	-1.522	1.444e-05	-3.02	3.397e-09	-2.70094	1.37e-15	-4.208	2.161e-18	1.46437	0.008791
MVLG_00478	0.2	0.19	30.01	28.82	774.73	377.17	1017.52	775.72	220.1	622.46	519.34	0	246.45	33.8	7.284	6.627e-21	11.49	1.888e-99	12.12	7.706e-112	11.04	2.822e-82	9.28	1.161e-28	4.23064	1.222e-36	4.831	1.457e-42	3.6782	1.608e-19	1.97535	0.0008358	0.6173	0.535	-0.4889	0.2328	-2.26	3.487e-09	-1.09291	0.002576	-2.879	3.706e-14	1.76642	7.998e-07
MVLG_03994	0.12	0.06	7.94	9.46	208.05	235.05	116.93	247.94	73.56	124.82	166.52	0	147.81	20.89	6.641	3.453e-11	11.26	1.266e-87	10.93	4.148e-85	10.23	6.437e-69	9.627	2.696e-28	4.63787	9.569e-36	4.28	2.089e-28	3.50328	1.264e-15	2.96007	3.433e-07	-0.3388	0.9755	-1.074	0.003248	-1.676	1.599e-05	-0.730955	0.0626	-1.353	0.000435	0.589939	0.08584
MVLG_07006	0.69	1.15	20.1	15.82	359.4	277	603.79	481.23	269.92	772.36	536.14	71.19	105.73	75.08	4.403	2.023e-19	8.486	6.378e-96	9.222	2.542e-107	9.041	7.253e-75	6.638	3.975e-31	4.10852	7.224e-34	4.816	3.562e-42	4.57261	7.275e-28	2.19071	3.042e-05	0.7243	0.3369	0.5296	0.2145	-1.903	1.433e-05	-0.183655	0.7155	-2.628	2.491e-10	2.41756	1.659e-09
MVLG_04699	155.89	185.06	217.59	531.57	1094.79	6936.28	2764.13	1647.83	405.49	87.12	375.89	851.22	722.43	809.06	1.278	7.899e-06	4.74	6.6e-52	3.781	1.585e-33	0.7929	0.02488	2.424	3.044e-09	3.50127	4.314e-33	2.497	8.875e-16	-0.532776	0.1959	1.10013	0.0505	-0.9828	0.05113	-3.951	3.843e-30	-2.372	7.073e-09	-2.96254	5.05e-18	-1.398	0.001689	-1.61224	0.0001235
MVLG_06541	0	0	137.88	104.35	1953.02	2328.86	339.19	1757.91	55.02	115.18	135.05	0	393.18	187.55	10.83	7.122e-14	14.94	1.528e-86	13.87	1.505e-70	11.07	1.252e-34	11.96	3.327e-18	4.14244	3.501e-31	3.005	3.037e-15	-0.137058	0.7863	1.40956	0.1398	-1.109	0.0385	-4.217	3.818e-32	-2.726	2.676e-11	-3.11415	2.036e-18	-1.646	4.451e-05	-1.51315	0.008663
MVLG_04305	83.34	53.23	5.74	1.07	80.75	48.94	82.57	62.09	23.56	54.28	44.34	6.54	16.16	13.76	-4.191	2.64e-35	-0.004682	0.996	0.123	0.7235	-0.8699	0.008495	-2.218	7.384e-09	4.20683	5.019e-30	4.312	3.129e-30	3.2622	2.373e-14	1.92497	0.00359	0.1184	1	-0.8884	0.01851	-2.27	3.246e-07	-0.993603	0.007583	-2.388	3.702e-08	1.3662	0.001675
MVLG_06838	0.54	0.34	2.04	0	124.4	77.06	186.11	129.42	50.62	103.28	90.5	0	27.12	18.78	1.336	0.6335	7.884	2.575e-57	8.512	9.168e-76	7.437	2.458e-52	5.696	1.479e-10	6.40478	1.039e-27	7.064	4.296e-35	6.02302	8.311e-21	4.1384	0.0002832	0.6159	0.634	-0.4747	0.2785	-2.237	1.375e-06	-1.07704	0.003893	-2.853	9.395e-11	1.74927	1.8e-05
MVLG_06078	0.4	0.67	45.8	25.67	441.9	329.25	823.17	550.03	71.12	198.67	207.07	0	230.1	29.39	6.171	7.734e-35	9.538	1.732e-97	10.34	5.594e-113	8.107	5.536e-61	7.736	1.975e-31	3.39748	1.053e-26	4.167	1.056e-35	1.8737	1.352e-06	1.53484	0.01327	0.7867	0.2348	-1.455	2.885e-05	-1.865	1.024e-06	-2.23138	3.801e-11	-2.655	2.407e-12	0.400242	0.2431
MVLG_03692	41.87	61.51	23.58	17.36	308	147.61	358.34	283.51	47.69	127.55	140.88	32.58	52.74	28.26	-1.212	0.0001443	2.185	4.197e-14	2.662	6.35e-19	0.9156	0.009416	-0.2916	0.5031	3.42136	1.165e-25	3.872	3.129e-30	2.06623	1.581e-07	0.874594	0.3353	0.4679	0.8173	-1.289	0.0002757	-2.536	9.119e-09	-1.74463	3.636e-07	-3.003	2.993e-12	1.22498	0.006935
MVLG_04326	0.26	0.13	190.36	161.44	2975.74	505.89	4873.83	2198.77	23228.8	53498.9	33470.8	1323.38	1173.17	490.75	9.79	3.384e-45	12.97	5e-103	14.04	2.308e-122	17.44	9.824e-139	12.19	4.779e-45	3.2036	1.169e-25	4.247	1.381e-38	7.54642	3.75e-61	2.40412	9.101e-08	1.06	0.02816	4.404	6.881e-28	-0.7852	0.1973	3.36326	4.023e-18	-1.838	1.456e-05	5.17272	8.84e-35
MVLG_04464	960.15	1928.15	796.05	642.65	90.99	71.09	25.75	48.25	78.6	63.19	51.37	92.82	121.05	252.05	-0.883	0.000803	-4.094	3.938e-38	-5.332	9.213e-52	-4.613	4.364e-43	-2.994	1.271e-16	-3.17462	2.499e-25	-4.447	8.644e-38	-3.78159	2.089e-29	-2.15369	2.873e-08	-1.238	0.08134	-0.5337	0.2482	1.035	0.1321	0.704453	0.1696	2.244	1.959e-05	-1.58814	0.0003159
MVLG_05836	1.39	2.95	352.73	0	4.22	2.03	0.72	3.33	0	5.53	7.28	0	71.67	161.84	6.472	3.072e-71	0.5876	0.7856	-0.4723	0.9069	1.209	0.02076	5.641	8.334e-24	-5.74538	3.57e-25	-6.801	4.739e-32	-5.30885	1.915e-43	-0.858846	0.05189	NA	NA	0.5926	0.9007	4.874	8.059e-10	1.65113	0.3267	5.879	1.242e-11	-4.438	1.439e-20
MVLG_06176	118.48	113.51	82.97	58.26	665.94	664.55	633.99	930.25	161.75	166.78	183.37	42.11	243.05	303.48	-0.5683	0.0795	2.613	2.776e-19	2.812	1.436e-20	0.4995	0.1766	1.138	0.01225	3.21359	1.494e-24	3.382	7.961e-25	1.01488	0.01269	1.66596	0.002025	0.1889	1	-2.13	3.978e-10	-1.539	0.0002025	-2.30847	1.141e-11	-1.735	1.46e-05	-0.607194	0.3519
MVLG_05525	1.68	1.25	348.57	88.75	2534.45	1448.43	1649.2	2132.95	75.62	102.27	238.63	801.18	297.93	451.62	7.387	1.801e-41	10.47	3.159e-98	10.41	4.192e-99	6.708	1.092e-41	8.453	1.123e-30	3.11559	8.456e-24	3.026	1.188e-20	-0.735507	0.07419	1.03537	0.1024	-0.07191	1	-3.785	1.22e-27	-2.052	1.175e-05	-3.70281	3.279e-26	-1.979	2.008e-05	-1.77962	3.115e-05
MVLG_04465	2.47	4.33	155.22	7.61	0	0	0.52	2.63	0.9	11.23	19.98	14.28	143.07	256.01	4.703	1.729e-44	-8.512	0.001526	-1.5	0.1675	1.703	1.568e-05	5.675	2.174e-30	-9.12258	3.421e-23	-6.082	1.333e-25	-3.04654	8.514e-18	0.940317	0.24	NA	NA	9.196	2.137e-06	9.733	1.484e-17	3.17292	0.0001922	6.953	6.21e-20	-3.97069	6.539e-21
MVLG_04978	0.04	0.15	0	1.02	113.83	43.2	215.81	142.56	63.74	147.5	101.87	0	21.91	7.84	NA	NA	9.602	6.63e-49	10.79	8.791e-79	9.903	8.568e-63	7.223	4.35e-07	6.85924	4.473e-23	8.125	1.381e-38	7.35083	2.724e-25	4.4165	0.004764	1.174	0.02521	0.2546	0.6327	-2.398	1.3e-06	-0.904665	0.01806	-3.573	1.244e-14	2.64901	7.443e-10
MVLG_02622	0	0.06	1.68	0	187.27	71.39	249.65	199.29	59.34	95.43	83.57	0	57.88	37.99	NA	NA	11.47	1.389e-48	12.28	5.983e-72	10.77	5.32e-51	9.925	7.451e-13	6.84775	5.847e-23	7.726	4.648e-33	6.26943	9.606e-17	5.30775	2.72e-05	0.7869	0.356	-0.8165	0.05004	-1.496	0.00136	-1.58924	8.773e-06	-2.283	8.546e-08	0.66538	0.08092
MVLG_04048	0.09	0.09	2.37	0	105.9	83.81	238.57	189.9	46.22	100.02	69.4	0	24.33	10.89	NA	NA	9.967	1.532e-50	11.12	2.298e-79	9.459	1.082e-54	7.523	4.35e-07	6.104	1.75e-22	7.279	3.713e-38	5.63215	1.102e-17	3.61451	0.004764	1.133	0.03605	-0.5644	0.1905	-2.46	4.421e-07	-1.68651	1.535e-06	-3.598	1.146e-14	1.8884	1.103e-05
MVLG_04797	4.7	4.73	194.77	134.24	1593.11	730.73	1740.05	1356.32	160.87	322.31	436.36	14.29	321.04	267.71	5.262	8.94e-60	7.998	6.914e-102	8.4	9.332e-102	5.944	4.579e-45	5.751	1.099e-31	2.76607	2.624e-22	3.142	6.524e-25	0.624153	0.1168	0.452932	0.8129	0.3944	0.8966	-2.073	5.97e-10	-2.313	1.714e-09	-2.45403	3.173e-13	-2.707	1.573e-12	0.222698	0.5885
MVLG_06011	0	0	2.17	0	190.51	120.17	411.39	223.71	88.15	86.03	81.57	0	123.53	19.31	NA	NA	12.99	2.025e-46	14.06	2.266e-74	12.34	4.172e-48	11.61	3.313e-15	6.75578	6.538e-22	7.865	5.346e-35	6.00381	5.555e-15	5.58828	3.352e-06	1.015	0.09914	-0.9904	0.01592	-1.131	0.01249	-1.98734	1.881e-08	-2.143	1.244e-07	0.132498	0.4983
MVLG_00815	4.76	3.44	0	3.49	316.17	137.98	515.68	563.07	585.67	780.69	496.83	0	124.35	62.13	-1.086	0.4634	5.865	2.402e-45	7.118	3.917e-72	7.301	2.07e-56	4.685	4.787e-14	6.65166	8.698e-21	7.986	1.19e-36	8.30417	6.631e-34	5.37186	1.527e-05	1.246	0.0156	1.414	0.0004089	-1.238	0.00861	0.181531	0.7528	-2.488	3.202e-09	2.64406	2.841e-11
MVLG_04107	0	0	2128.04	2868.75	242.92	445.48	44.06	221.62	9.17	17.2	64.04	2286.27	7245.97	12034.8	15.52	5.331e-112	12.65	3.152e-38	11.04	2.461e-21	9.633	6.465e-21	17.01	8.317e-66	-2.82121	1.575e-19	-4.508	1.362e-34	-6.25086	9.927e-62	1.76751	3.599e-05	-1.636	0.01775	-3.352	6.611e-17	4.601	4.034e-21	-1.74978	6.186e-05	6.169	3.177e-30	-8.0105	2.475e-61
MVLG_05570	35189.2	50506.6	173.52	0	420.73	829.96	219.85	420.1	41.73	3.66	7.63	4258.89	86.57	158.69	-8.797	1.306e-138	-5.985	3.968e-74	-7.027	1.761e-84	-11.73	1.393e-149	-5.129	2.016e-39	2.85654	1.656e-19	1.781	1.914e-07	-2.95618	2.318e-10	3.64133	1.901e-15	-1.054	0.04789	-5.733	1.08e-44	0.8461	0.1276	-4.66459	3.505e-30	1.882	4.056e-05	-6.51905	8.424e-42
MVLG_04359	0	0	0	0	110.92	32.08	292.32	154.06	81.73	192.55	127.41	0	4.07	7.28	NA	NA	12.73	2.235e-40	14.42	2.151e-80	13.84	2.33e-64	NA	NA	8.68296	6.932e-19	10.9	4.744e-41	12.5129	4.315e-28	NA	NA	1.633	0.0003722	0.7645	0.08166	-3.751	1.445e-08	-0.853433	0.02717	-5.394	6.21e-20	4.5356	6.095e-16
MVLG_01138	6.87	6.44	926.02	0	0	0	0	0	27.85	27.39	29.03	0	212.77	270.05	6.359	5.442e-49	-6.448	0.259	-6.49	0.07468	2.368	1.846e-07	5.501	1.571e-15	-8.71536	9.33e-19	-9.312	2.408e-23	-4.03851	1.26e-23	-0.883747	0.06024	NA	NA	7.797	0.004529	7.507	7.098e-06	7.86726	0.0001204	8.096	4.248e-07	-3.11241	5.314e-09
MVLG_06912	3.17	3.71	5.49	1.86	162.57	84.88	184.3	172.78	198.44	42.23	26.54	22.86	12.24	2.75	0.2426	0.9145	5.229	6.453e-42	5.746	8.186e-53	4.511	3.342e-28	1.594	0.08935	4.92934	2.867e-18	5.448	8.283e-24	4.22858	1.482e-12	NA	NA	0.508	0.8388	-0.7185	0.1276	-3.651	3.723e-07	-1.20271	0.002503	-4.172	2.098e-10	2.95418	9.28e-06
MVLG_06089	2.15	0.89	1	0	82.21	20.5	237.66	104.9	87.07	215.81	139.71	0	6.01	7.68	-1.441	0.2424	5.132	3.371e-36	6.873	5.18e-70	6.527	9.018e-49	2.171	0.03205	6.27304	7.511e-17	8.097	3.713e-38	7.87814	5.461e-30	NA	NA	1.73	0.0001747	1.37	0.0008173	-2.982	1.498e-06	-0.343871	0.4665	-4.713	1.269e-17	4.35744	4.301e-17
MVLG_00097	137.18	90	127.62	126.87	784.02	481.96	1404.51	1049.56	472.34	802.81	753.41	257.52	241.42	199.4	0.3074	0.2807	2.548	2.928e-19	3.47	8.08e-30	2.443	3.774e-12	1.075	0.006782	2.27164	2.323e-16	3.166	3.435e-26	2.07512	5.611e-09	0.732044	0.2547	0.9135	0.08768	-0.1261	0.8047	-1.521	0.0004635	-1.02615	0.004848	-2.434	9.445e-10	1.37445	0.0008008
MVLG_00313	35.6	15.82	3.45	3.45	73.42	76.72	120.49	176.56	48.84	53.63	44.57	0	69.8	35.19	-2.734	4.817e-07	1.651	6.012e-07	2.584	9.719e-17	0.8564	0.01725	1.03	0.1154	4.36215	3.497e-16	5.283	1.817e-27	3.52983	5.33e-10	3.6656	8.605e-07	0.9236	0.1822	-0.8161	0.056	-0.6857	0.1714	-1.73267	1.283e-06	-1.621	7.085e-05	-0.143023	0.8972
MVLG_03333	2.96	1.08	7.68	1.95	173.33	66.79	411.02	205.85	469.18	1143.07	641.29	24.04	17.6	14.36	1.416	0.2902	5.959	6.778e-43	7.329	4.41e-75	8.523	4.179e-69	3.229	3.886e-05	4.50388	5.343e-16	5.87	1.357e-32	7.03376	4.123e-39	NA	NA	1.358	0.006593	2.536	9.859e-11	-2.761	2.167e-05	1.19463	0.001992	-4.116	7.325e-13	5.29357	1.519e-23
MVLG_00757	0.22	0.22	146.5	3.12	8.31	0	4.77	3.18	0	3.28	0.47	0	0	0	8.498	3.797e-57	NA	NA	4.255	6.212e-07	2.921	5.097e-06	NA	NA	-4.16116	6.183e-16	-4.2	3.522e-20	-5.64157	1.543e-43	-8.88838	1.901e-15	NA	NA	-1.373	0.2204	NA	NA	-1.35397	0.03322	NA	NA	6.22515	0.2363
MVLG_01246	445.99	490	28.44	8.11	153.81	136.85	116.24	161.16	87.17	83.19	88.72	111.56	35.79	26.55	-4.543	7.82e-45	-1.609	3.756e-08	-1.721	1.134e-08	-2.55	1.047e-15	-3.433	2.145e-14	2.96169	7.013e-16	2.822	3.164e-14	1.94345	3.498e-06	1.05565	0.1292	-0.1203	1	-0.9571	0.01295	-1.866	0.002803	-0.827558	0.03534	-1.749	0.003815	0.862241	0.2634
MVLG_02083	0.13	0.11	1.5	2.46	47.97	22.35	72.36	51.58	22.56	64.81	46.3	6	22.7	4.67	4.126	0.0002512	8.195	1.611e-46	8.997	2.151e-70	8.383	5.932e-59	6.854	7.916e-14	4.0558	1.174e-15	4.843	4.595e-25	4.17744	3.644e-16	2.65598	0.00113	0.7905	0.3636	0.1539	0.8122	-1.388	0.01021	-0.623211	0.133	-2.178	2.823e-06	1.53154	0.0007089
MVLG_03160	189.34	170.26	5.8	1.46	122.07	48.43	277.31	220.28	237.59	237.94	266.76	71.59	98.13	41.77	-5.478	1.438e-34	-1.013	0.001588	0.5254	0.09469	0.3861	0.3051	-1.189	0.004243	4.42601	3.602e-15	5.96	8.029e-34	5.80665	4.688e-27	4.16977	1.638e-08	1.529	0.001124	1.385	0.0006126	-0.2336	0.8826	-0.129348	0.8168	-1.761	0.0002177	1.59355	0.0004095
MVLG_01159	0.07	0.04	31.55	7.87	159.71	122.71	62.04	97.36	14.34	28.66	26.16	0	104.34	25.79	8.397	3.728e-18	11.17	2.193e-68	10.3	8.636e-59	8.473	3.983e-40	9.882	1.331e-22	2.80721	6.567e-15	1.901	9.812e-07	-0.0205161	0.9826	1.49517	0.0607	-0.8838	0.2239	-2.766	5.135e-15	-1.312	0.001682	-1.87818	1.965e-07	-0.445	0.283	-1.46936	0.007523
MVLG_04436	84.09	50.95	3.02	2.49	33.21	37.43	53.81	80.05	70.42	111.11	99.81	6.07	28.67	9.45	-4.467	3.437e-30	-0.8412	0.008656	0.02383	0.936	0.3553	0.3503	-1.789	3.5e-06	3.63007	1.568e-14	4.473	6.436e-24	4.76121	2.974e-23	2.60892	0.0005888	0.8557	0.2473	1.174	0.004131	-1.012	0.0784	0.324277	0.5336	-1.879	2.818e-05	2.17203	1.661e-07
MVLG_01236	743.15	893.54	29.14	0	196.76	139.5	508.83	336.33	155.64	153.93	162.5	104.67	48.28	43.38	-5.653	2.488e-54	-2.205	3.419e-13	-0.8906	0.002884	-2.417	2.884e-14	-3.825	1.909e-17	3.45823	2.273e-14	4.751	1.248e-30	3.18454	5.699e-12	1.7608	0.02751	1.301	0.008105	-0.2278	0.6571	-1.669	0.01344	-1.51401	2.104e-05	-2.965	1.36e-08	1.40735	0.01763
MVLG_04293	4.58	4.69	216.92	225.1	1272.05	830.76	1479.19	1250.41	242.44	542.82	500.75	151.35	268.79	206.96	5.718	6.635e-63	7.898	2.569e-96	8.258	3.03e-96	6.513	7.434e-50	5.746	8.315e-30	2.21005	4.556e-14	2.54	1.471e-16	0.73074	0.06475	-0.0107934	1	0.3499	0.9544	-1.408	5.191e-05	-2.21	1.244e-07	-1.74606	3.376e-07	-2.561	3.411e-10	0.784834	0.08404
MVLG_01951	160.72	177.54	2.55	3.84	105.56	32.8	355.51	119.72	109.72	281.78	205.7	31.38	14.13	11.68	-5.582	3.959e-36	-1.238	0.0001026	0.5477	0.08657	0.17	0.6869	-3.43	3.893e-11	4.30368	5.11e-14	6.084	1.333e-35	5.68313	7.099e-26	2.04021	0.09693	1.772	9.967e-05	1.387	0.0006571	-2.229	0.002472	-0.367324	0.4332	-3.993	2.905e-12	3.59944	5.553e-11
MVLG_02736	224.94	226.22	143.55	149.32	1089.9	383.66	2319.53	1498.49	1092.5	2927.66	2102.47	204.07	259.72	169.05	-0.477	0.1121	1.76	6.9e-10	3.135	3.915e-25	3.146	3.139e-18	0.06386	0.963	2.26214	5.249e-14	3.612	1.765e-30	3.55782	1.437e-20	0.499315	0.6602	1.368	0.001239	1.363	0.0002846	-1.752	8.306e-05	0.0102469	0.9984	-3.116	3.253e-14	3.09891	9.853e-15
MVLG_03574	37.11	57.92	10.54	5.26	90.95	77.12	265.33	203.27	79.71	142.33	142.82	25.76	38.73	42.43	-2.382	4.77e-09	0.9578	0.003006	2.356	7.044e-15	1.2	0.0005914	-0.1739	0.7212	3.35081	7.473e-14	4.724	1.072e-30	3.52331	2.556e-14	2.14088	0.002766	1.384	0.003469	0.2234	0.6915	-1.19	0.0528	-1.14888	0.001722	-2.573	2.429e-08	1.38879	0.003485
MVLG_03556	23.32	18.28	8.79	5.81	91.02	35.66	158.64	84.37	163.01	182.27	188.06	35.47	56.57	13.63	-1.369	0.000929	1.665	1.64e-07	2.597	3.03e-17	2.976	1.736e-16	0.8986	0.06578	3.04929	5.848e-13	3.959	2.123e-23	4.2893	3.335e-22	2.21224	0.0005681	0.9212	0.1623	1.295	0.001087	-0.8236	0.2403	0.392107	0.4049	-1.739	0.000269	2.09684	1.206e-06
MVLG_04605	11.29	10.07	7.66	0	198.09	42.88	593.8	166.51	227.65	598.9	324.32	0	18.74	0	-1.296	0.08638	3.551	6.19e-20	5.252	2.581e-50	5.196	4.941e-37	0.2586	0.8296	4.76088	5.848e-13	6.473	1.061e-32	6.41936	3.752e-28	NA	NA	1.686	0.0003379	1.622	6.56e-05	-3.306	1.805e-07	-0.0439484	0.9547	-4.994	5.223e-18	4.95723	2.911e-20
MVLG_02265	0.65	0.86	64.73	87.79	4.03	10.38	0.92	5.31	0	0.43	0.53	246.82	127.79	183.49	6.773	6.215e-59	3.328	9.026e-05	1.643	0.05096	-0.9052	0.09813	7.905	1.036e-37	-3.38848	7.493e-13	-5.081	1.793e-21	-7.71491	1.887e-50	1.09223	0.05128	NA	NA	NA	NA	4.497	1.2e-13	NA	NA	6.11	6.21e-20	-8.77599	6.138e-43
MVLG_04105	0	0	1648.73	1749.15	363	391.25	90.17	287.59	10.89	11.63	22	1058.97	809.39	1218.91	15.39	3.256e-109	13.17	2.507e-50	12.08	1.972e-38	8.893	2.788e-15	14.44	5.27e-42	-2.17665	1.297e-12	-3.348	4.918e-23	-6.86346	9.621e-67	-0.666128	0.3107	-1.13	0.1264	-4.61	4.112e-29	1.528	0.003699	-3.49558	5.218e-17	2.616	1.161e-07	-6.16797	3.848e-39
MVLG_07195	0.49	0.63	44.81	13	407.89	179.83	188.47	260.76	24.37	15.71	29.43	0	9.49	5.73	5.78	1.381e-07	9.016	8.183e-46	8.619	9.932e-49	5.358	3.844e-21	NA	NA	3.24498	2.415e-12	2.824	1.24e-09	-0.491987	0.5553	NA	NA	-0.4031	0.9727	-3.686	6.805e-20	-4.949	1.032e-11	-3.27653	1.038e-16	-4.593	9.406e-11	1.33732	0.1322
MVLG_01050	2.03	1.84	26.81	18.53	156.2	112.48	95.45	109.46	39.47	43.92	34.42	0	66.43	47.54	3.685	6.062e-16	6.186	1.319e-61	5.76	3.45e-53	4.237	1.378e-25	4.816	1.272e-20	2.52782	3.372e-12	2.074	3.713e-08	0.494872	0.3284	1.08977	0.3537	-0.4345	0.908	-1.969	4.343e-08	-1.432	0.0008375	-1.52322	3.229e-05	-1.006	0.01625	-0.547931	0.6802
MVLG_01284	0.38	0.37	2550.17	2573.64	15496.4	4675.28	40169.1	19478.5	7610.4	12158.2	7985.77	7299.82	2910.97	3821.83	12.81	9.878e-143	14.68	1.334e-158	16.26	4.031e-181	14.53	6.726e-121	13.57	1.815e-69	1.89875	3.372e-12	3.449	4.682e-31	1.63942	3.381e-06	0.744856	0.2241	1.569	9.818e-05	-0.1951	0.6784	-1.137	0.01657	-1.74576	2.872e-07	-2.704	6.036e-12	0.931103	0.03229
MVLG_00270	116.78	157.36	32.82	17.44	139.6	108.99	199.09	167.21	101.71	163.06	130.41	66.02	71.01	59.61	-2.323	2.78e-15	-0.07699	0.8321	0.4475	0.1527	-0.1904	0.6098	-0.9942	0.01371	2.27763	3.389e-12	2.773	5.162e-17	2.0765	5.627e-08	1.28474	0.02819	0.5128	0.7504	-0.1333	0.7964	-0.9742	0.09527	-0.633607	0.1196	-1.487	0.001419	0.81843	0.09371
MVLG_05120	2.32	2.63	94563.6	104774	27012.1	27583.5	3819.48	16364.2	517.18	530.38	1949.71	78794	56821.9	74806.5	15.44	3.242e-244	13.52	2.765e-176	12.07	1.263e-146	8.708	5.94e-69	14.93	1.262e-101	-1.88104	3.656e-12	-3.363	6.926e-30	-6.78809	9.34e-76	-0.537537	0.444	-1.459	0.0003379	-4.829	6.855e-43	1.366	0.004049	-3.36192	6.592e-23	2.82	1.606e-10	-6.22952	1.057e-46
MVLG_01383	149.34	178.23	118.15	120.94	1014.71	286.25	1555.91	798.54	516.19	1018.9	718.21	0	256.79	95.52	-0.2959	0.4234	2.045	1.016e-11	2.943	7.059e-22	2.301	5.791e-11	0.2843	1	2.36323	8.733e-12	3.237	2.477e-21	2.53487	1.143e-10	0.538794	0.8967	0.8895	0.1551	0.2362	0.6417	-1.824	8.595e-06	-0.635275	0.1197	-2.711	1.198e-11	2.05561	3.982e-08
MVLG_05099	25.23	17.97	26.52	30.4	222.29	90.84	181.33	141.05	43.55	70.61	79.47	0	66.71	57.81	0.5477	0.1591	2.922	1.562e-20	2.96	5.803e-21	1.526	1.558e-05	1.495	0.005914	2.39738	5.9e-11	2.41	5.433e-11	0.917524	0.04423	0.903742	0.5645	0.03	1	-1.415	0.0001283	-1.487	0.0006784	-1.42967	7.606e-05	-1.516	0.0002309	0.0548907	0.6868
MVLG_05316	120.8	70.28	182.5	226.96	903.96	654	1064.57	892.81	414.35	984.3	642.8	497.33	254.68	167.79	1.255	4.028e-06	3.115	2.17e-26	3.415	6.71e-29	2.77	7.417e-15	1.616	5.109e-05	1.89057	6.17e-11	2.161	9.198e-13	1.44885	6.187e-05	0.321396	0.7677	0.2907	0.9799	-0.3696	0.3894	-1.538	0.001406	-0.648213	0.1053	-1.828	4.182e-05	1.1448	0.01306
MVLG_00814	0.67	0.19	177.2	149.33	728.88	635.44	619.24	1153.43	197.28	238.71	153.17	125.11	203.3	221.02	8.666	1.936e-53	10.67	8.203e-87	11.02	5.69e-96	8.791	2.456e-59	8.973	4.396e-28	2.0355	8.469e-11	2.356	1.722e-13	0.052535	0.9421	0.284209	0.9305	0.3431	0.9652	-1.914	3.182e-08	-1.738	9.694e-05	-2.24608	4.919e-11	-2.088	8.243e-07	-0.192019	0.8732
MVLG_03747	1.2	0.73	532.33	767.45	163.92	193.21	45.25	108.97	13.41	5.87	16.36	1093.84	491.8	450.07	9.53	1.158e-125	7.617	1.134e-72	6.312	4.485e-55	3.474	4.583e-16	9.424	4.58e-54	-1.87954	1.368e-10	-3.22	7.188e-24	-6.11321	2.923e-60	-0.139766	0.9801	-1.307	0.011	-4.156	1.109e-28	1.768	0.0001671	-2.85191	6.456e-14	3.049	7.25e-11	-5.94772	3.538e-40
MVLG_00042	83.79	60.28	118.32	122.85	567.28	348.75	921.19	682.98	302.08	524.08	397.39	119.21	159.04	123.41	0.8906	0.001565	2.742	4.367e-21	3.524	3.655e-30	2.411	7.197e-12	1.032	0.01639	1.88191	2.056e-10	2.635	6.907e-18	1.4593	6.4e-05	0.103207	1	0.7729	0.2463	-0.3527	0.4184	-1.765	5.465e-05	-1.11185	0.002117	-2.537	6.593e-10	1.39396	0.0009229
MVLG_01520	0.91	0.75	1.01	0	23.3	9.7	91.95	33.78	20.81	47.31	49.45	0	5.3	1.58	-0.5782	0.6715	4.373	2.17e-21	6.298	1.528e-61	5.456	9.731e-38	2.195	0.02016	4.8122	2.064e-10	6.765	4.707e-31	5.96031	3.005e-20	NA	NA	1.907	9.818e-05	1.061	0.01952	-2.213	0.0003754	-0.82993	0.03555	-4.117	1.244e-14	3.2732	3.568e-11
MVLG_00326	17.46	16.34	847.04	1095.2	263.64	303.06	61.73	214.03	14.3	16.59	48.48	1256.44	1401.87	1181.53	5.986	5.511e-83	4.159	6.697e-40	3.046	7.327e-22	0.59	0.1278	6.321	1.265e-40	-1.79261	3.639e-10	-2.94	1.739e-21	-5.45278	1.13e-53	0.29712	0.8312	-1.115	0.03458	-3.584	1.41e-24	2.11	3.221e-06	-2.47237	2.176e-12	3.203	2.993e-12	-5.73432	3.193e-40
MVLG_05383	0.99	0.75	0	1.24	40.31	15.84	181.14	67.85	185.9	487.06	517.69	0	48.39	1.88	-0.5421	0.8418	5.18	2.664e-22	7.328	6.594e-71	8.811	8.609e-71	5.001	4.775e-12	5.42683	3.904e-10	7.652	4.703e-32	9.26452	1.907e-43	5.14812	8.744e-05	2.13	9.04e-06	3.609	7.18e-18	-0.2417	0.6148	1.49346	7.825e-05	-2.363	1.756e-08	3.84109	1.134e-20
MVLG_03976	218.05	248.94	783.38	1239.74	5221.99	2114.82	5670.51	3496.17	1138.38	2312.46	1916.1	1218.6	832.29	592.63	2.263	2.672e-16	4.049	4.557e-40	4.415	8.026e-43	3.15	3.258e-18	2.094	3.669e-07	1.81097	5.743e-10	2.149	1.472e-12	0.821082	0.03155	-0.212828	0.9252	0.3567	0.9491	-0.9213	0.01223	-2.007	4.403e-06	-1.26231	0.0003691	-2.36	2.345e-08	1.06355	0.02016
MVLG_00031	55.66	58.9	18.11	24.34	86.86	159.12	125.15	232.78	64.03	45.35	42.58	37.34	59.92	29.71	-1.29	0.0006468	1.21	0.0001478	1.675	4.123e-08	-0.2804	0.472	-0.192	0.6818	2.52533	6.335e-10	2.958	3.489e-14	0.955906	0.0529	1.0466	0.3416	0.4545	0.8755	-1.507	0.0001012	-1.464	0.01137	-1.95688	5.894e-08	-1.935	9.168e-05	-0.060091	1
MVLG_06911	1.93	2.46	6.35	7.64	94.82	39.14	124.43	41.47	228.84	220.66	174.76	78.02	36.77	19.37	1.803	0.01543	4.98	9.191e-35	5.326	1.07e-45	6.459	1.861e-48	4.043	2.404e-13	3.17789	8.095e-10	3.507	1.775e-13	4.5987	8.993e-22	2.1636	0.004436	0.3289	0.9938	1.463	0.0003291	-0.9826	0.3218	1.16366	0.002931	-1.287	0.07991	2.41244	3.032e-06
MVLG_02171	62.95	42.45	116.83	0	2.27	2.18	0	1.79	0.73	5.39	9.89	21.06	78.17	112.21	0.3113	0.6226	-4.458	2.693e-11	-6.505	5.957e-19	-3.104	3.059e-20	0.859	0.1073	-4.59212	8.583e-10	-6.453	1.124e-15	-3.46226	1.912e-16	0.514274	0.8322	NA	NA	1.324	0.5137	5.082	1.16e-08	3.35308	0.02486	6.861	2.366e-10	-3.96648	3.355e-17
MVLG_00830	59.45	61.61	0	0	33.66	16.28	99.63	57.08	72.88	125.38	97.83	11.03	9.38	5.59	-12.85	2.87e-32	-1.213	0.0007065	0.4319	0.2036	0.6067	0.09635	-2.802	2.088e-07	7.58434	9.466e-10	9.795	2.05e-27	12.4459	1.755e-27	NA	NA	1.629	0.002467	1.8	2.746e-05	-1.63	0.06944	0.186566	0.7353	-3.254	8.229e-08	3.41814	8.257e-10
MVLG_03367	8.4	12.84	223.56	10.32	15.26	27.96	29.79	13.27	16.58	25.62	31.12	14.04	210.86	280.87	3.587	1.175e-31	1.112	0.01651	1.15	0.003591	1.139	0.001942	4.331	1.349e-21	-2.42133	9.906e-10	-2.414	1.582e-11	-2.49239	9.596e-13	0.711957	0.497	0.01438	1	0.004919	0.9882	3.136	1.202e-08	0.0168546	0.97	3.15	5.134e-10	-3.16624	2.239e-14
MVLG_02330	85.55	73.05	98.26	111.42	455.61	314.65	513.72	441.14	251.79	328.21	245.09	101.6	122.38	94.15	0.5477	0.06571	2.356	5.048e-16	2.64	1.859e-18	1.707	8.289e-07	0.5552	0.2479	1.83833	1.967e-09	2.093	2.651e-11	1.10004	0.003822	-0.0336722	1	0.274	0.9804	-0.6689	0.08804	-1.857	4.337e-05	-0.928622	0.01345	-2.131	8.813e-07	1.16727	0.009114
MVLG_02863	183.85	199.15	217.06	618.54	882.5	1755.97	812.04	1185.34	94.05	79.31	156.68	332.56	96.23	148.05	1.264	1.212e-06	2.889	7.175e-24	2.425	2.276e-16	-0.937	0.004548	-0.1052	0.9307	1.65705	2.525e-09	1.154	0.0001843	-2.26209	2.636e-12	-1.41446	0.002264	-0.4788	0.7637	-3.839	1.924e-29	-3.032	3.178e-13	-3.35379	9.544e-23	-2.56	1.168e-09	-0.844408	0.05791
MVLG_02087	288.48	339.52	158.39	137.97	464.37	537.72	771.08	775.71	257.29	460.03	542.2	173.29	194.44	252.76	-0.95	0.0004957	0.7599	0.008553	1.34	4.592e-06	0.3174	0.4046	-0.4764	0.2373	1.74567	2.805e-09	2.292	4.148e-14	1.20862	0.0009866	0.433002	0.7045	0.5668	0.616	-0.4616	0.2644	-1.294	0.005559	-1.01996	0.00532	-1.864	7.643e-06	0.809367	0.07529
MVLG_03811	38.2	44.8	2.92	3.88	42.57	34.91	15.07	34.7	15.42	12.28	31.38	35.54	20.91	71.81	-3.474	1.506e-13	-0.02558	0.9731	-0.8064	0.03914	-1.169	0.0004422	0.1758	0.7938	3.4325	3.67e-09	2.634	1.613e-05	2.2486	0.0003093	3.54687	4.671e-07	-0.7785	0.6707	-1.156	0.008459	0.1438	0.969	-0.388574	0.4323	0.8864	0.2771	-1.34436	0.008149
MVLG_03834	41.88	31.12	98.78	126.86	422.13	482.97	633.91	525.66	366.18	754	466.43	409.6	88.91	167.99	1.789	5.773e-08	3.748	2.693e-32	4.073	4.481e-36	3.893	7.327e-25	2.351	9.908e-08	1.99073	3.851e-09	2.283	9.943e-12	2.03883	1.031e-07	0.510672	0.5436	0.3107	0.9799	0.1196	0.8449	-1.437	0.02598	-0.180382	0.7236	-1.743	0.001555	1.5156	0.00395
MVLG_01449	23.65	25.4	88.43	104.33	695.42	230.74	708.38	436.75	130.05	315.35	209.13	231.66	135.01	36.32	2.134	1.316e-07	4.306	5.056e-36	4.659	3.867e-42	3.306	1.623e-18	2.367	2.561e-06	2.1943	6.965e-09	2.523	6.566e-12	1.10709	0.01289	0.1866	0.9416	0.3436	0.9762	-1.022	0.008458	-1.988	0.0007355	-1.34859	0.0001987	-2.324	1.644e-05	0.941584	0.1507
MVLG_04026	12195.6	6270.33	9.45	0	90.86	101.98	34.37	71.17	7.76	1.25	3.11	980.01	17.63	45.47	-10.71	2.529e-123	-6.451	2.179e-74	-7.475	8.671e-83	-11.68	1.083e-133	-5.959	6.822e-35	4.18325	1.011e-08	3.168	8.801e-05	-1.01822	1	4.54828	3.742e-09	-1.022	0.5053	-5.228	7.422e-19	0.4998	0.2831	-4.21201	2.362e-12	1.512	0.006495	-5.80032	3.693e-19
MVLG_01309	0.29	0.39	728.27	598.84	229.47	200.73	110.98	200.83	12.77	16.04	31.49	1000.53	809.89	1274.46	11.02	4.626e-130	9.332	3.797e-81	8.822	2.498e-76	5.774	1.421e-33	11.58	3.136e-62	-1.64806	1.61e-08	-2.19	6.901e-13	-5.30241	6.129e-51	0.539341	0.4951	-0.5166	0.7771	-3.58	4.055e-24	2.208	1.138e-06	-3.05929	4.023e-18	2.714	1.844e-09	-5.82435	6.945e-41
MVLG_01996	346.91	313.81	105.58	84.18	346.68	258.06	643.79	544.23	275.71	380.32	382.15	260.02	143.23	173.41	-1.664	4.803e-10	-0.05644	0.876	0.8827	0.002833	-0.06317	0.8692	-0.7932	0.05325	1.64096	2.854e-08	2.55	2.912e-17	1.54466	1.852e-05	0.832562	0.1656	0.9287	0.08578	-0.02529	0.9647	-0.7822	0.2144	-0.941342	0.01118	-1.711	8.072e-05	0.731737	0.1414
MVLG_05443	405.4	238.64	1774.25	3633.74	4545.49	10976.8	2404.84	14269	583	92.75	393.46	3137.44	527.02	814.51	3.231	4.37e-33	4.738	3.151e-53	4.79	1.536e-49	0.07655	0.853	2.139	5.218e-08	1.54501	3.036e-08	1.56	1.274e-07	-3.19793	1.117e-22	-1.12397	0.02209	0.04017	1	-4.666	1.83e-40	-2.627	1.101e-10	-4.69463	1.175e-39	-2.679	4.611e-11	-2.06938	1.367e-07
MVLG_00885	2.26	0.69	30042.5	29730.1	9597.11	10380.7	2126.53	4811.01	354.44	155.49	412.74	12409	4257.1	6673.17	14.31	2.222e-166	12.72	3.279e-115	11.19	1.875e-89	7.961	1.909e-44	12.49	4.081e-56	-1.5464	3.902e-08	-3.121	2.922e-25	-6.4171	4.181e-68	-1.82502	2.815e-06	-1.55	0.0001886	-4.796	1.258e-40	-0.2513	0.8303	-3.23825	3.026e-20	1.287	0.00785	-4.57152	3.772e-28
MVLG_01380	149.77	144.82	608.02	1701.31	2811.4	3884.79	2367.43	2439.47	168.22	128.92	327.12	872.64	232.8	295.16	3.113	3.921e-31	4.602	6.646e-51	4.069	1.693e-38	0.3729	0.3226	1.587	4.565e-05	1.51928	5.328e-08	0.9494	0.002726	-2.79969	3.911e-18	-1.56406	0.0002002	-0.5468	0.6394	-4.241	7.788e-35	-3.049	3.829e-14	-3.68603	9.309e-27	-2.509	7.528e-10	-1.2231	0.002975
MVLG_02690	3161.9	3728.88	179.03	256.41	385.86	1067.73	778.84	1071.33	3104.98	1603.3	2092.08	1690.01	773.56	556.39	-3.833	1.736e-39	-2.094	3.991e-13	-1.818	8.747e-10	-0.5617	0.1049	-1.78	3.496e-06	1.77524	6.063e-08	2.013	7.242e-10	3.22267	3.316e-17	2.0071	1.095e-05	0.2599	0.9938	1.52	5.827e-05	0.2669	0.7929	1.26873	0.0009821	-0.001523	1	1.21805	0.006532
MVLG_05819	30.91	22.66	143.56	172.65	640.53	349.28	934.14	600.35	191.2	417.05	377.31	396	327.56	177.9	2.707	1.643e-22	4.274	1.132e-43	4.882	5.522e-50	3.521	1.49e-21	3.497	6.496e-17	1.59601	6.063e-08	2.175	4.999e-13	0.749974	0.05081	0.752378	0.2446	0.5982	0.5516	-0.7754	0.04023	-0.8226	0.1704	-1.36011	0.0001039	-1.419	0.00155	0.0250398	1
MVLG_00779	27.42	24.15	27.51	24.88	106.87	77.47	87.87	89.06	36.81	54.02	51.55	22.04	75.15	50.19	0.1588	0.6464	1.908	8.778e-11	1.814	1.499e-09	0.7504	0.03601	1.179	0.008048	1.78018	6.205e-08	1.657	7.783e-07	0.533303	0.2182	0.981056	0.1772	-0.1029	1	-1.177	0.001279	-0.7914	0.1459	-1.06243	0.004235	-0.6921	0.1765	-0.402784	0.6046
MVLG_01258	15.38	17.25	1.95	0	68.41	17.6	113.78	22.8	24.16	42.62	32.58	48.91	4.87	2.92	-3.884	1.73e-05	1.456	0.001488	2.238	1.05e-10	1.03	0.006054	-1.196	0.4351	5.04634	6.744e-08	5.91	1.744e-13	4.83056	4.254e-08	NA	NA	0.7589	0.7189	-0.4457	0.4613	-2.639	0.05325	-1.17117	0.005177	-3.377	0.0005532	2.20501	0.06288
MVLG_00716	1.02	1.35	95.5	63.21	329.66	201.14	403.71	257.47	61.17	179.95	171.17	76.06	197.89	175.42	6.187	1.225e-59	7.857	8.257e-85	8.152	6.669e-89	6.77	3.305e-50	7.205	1.075e-36	1.70174	8.522e-08	1.968	6.756e-10	0.519752	0.2223	0.981904	0.1468	0.2832	0.9804	-1.111	0.002248	-0.711	0.2063	-1.382	8.928e-05	-0.9926	0.0324	-0.417871	0.5501
MVLG_02406	0.24	0.11	21.07	15.66	173.24	105.17	310.65	151.95	259.45	275.35	163.52	38.86	45.94	21.81	NA	NA	9.506	1.302e-31	10.27	1.149e-58	10.23	4.998e-59	7.669	1.33e-06	2.85113	9.356e-08	3.591	1.097e-14	3.47017	6.778e-13	0.99449	0.5381	0.7432	0.5356	0.664	0.1561	-1.838	0.008062	-0.0564895	0.9464	-2.571	5.159e-06	2.49133	2.096e-06
MVLG_02293	45.21	28.84	136.93	92.03	474.31	254.61	624.8	378.36	213.72	233.45	226.2	205.72	293.58	178.6	1.778	2.576e-10	3.371	2.763e-29	3.81	8.482e-34	2.503	1.44e-12	2.73	3.841e-11	1.62551	9.765e-08	2.037	4.42e-11	0.672294	0.08957	0.916578	0.1378	0.4296	0.872	-0.8857	0.01802	-0.6945	0.2663	-1.29884	0.0002554	-1.122	0.01667	-0.213446	0.787
MVLG_06588	78.45	62.59	77.2	58.48	264.3	166.1	481.81	358.97	133.25	293.02	237.08	58.22	140.95	129.59	0.0834	0.802	1.678	4.172e-09	2.614	1.867e-18	1.536	8.777e-06	0.8336	0.06199	1.62708	1.007e-07	2.534	1.62e-16	1.39166	0.0001587	0.712993	0.3845	0.9261	0.09236	-0.1648	0.7363	-0.9046	0.07745	-1.07826	0.003018	-1.831	7.15e-06	0.724805	0.1003
MVLG_00037	241.64	243.43	180.56	184.35	622.75	466.64	1245.87	898.1	350.59	656.06	519.21	280.18	259.57	248.65	-0.2744	0.3445	1.238	1.139e-05	2.178	1.222e-13	0.9541	0.006197	0.173	0.7375	1.54402	1.206e-07	2.453	1.963e-16	1.16688	0.001345	0.407936	0.7039	0.9292	0.08578	-0.3051	0.4927	-1.116	0.02427	-1.22217	0.0005808	-2.046	6.352e-07	0.791912	0.08798
MVLG_01569	79.04	55.85	48.1	39.56	200.53	126.71	141.66	146.78	58.73	71.71	68.83	15.14	71.53	62.15	-0.4714	0.1663	1.358	7.393e-06	1.15	0.0001742	-0.09391	0.8071	-0.01554	0.8187	1.85856	1.712e-07	1.623	7.064e-06	0.321037	0.5282	0.416507	0.8967	-0.2157	1	-1.47	6.262e-05	-1.433	0.002294	-1.24213	0.0008113	-1.222	0.00892	-0.0541055	0.962
MVLG_05528	0	0	4.72	0	119.12	79.82	79.11	77.24	3.69	5.13	10.3	0	10.78	6.53	NA	NA	11.2	1.944e-14	10.89	1.316e-20	7.708	2.813e-08	NA	NA	4.96674	1.759e-07	4.701	1.006e-06	1.37531	0.4365	NA	NA	-0.3537	1	-3.819	1.057e-11	-3.195	0.0001872	-3.4551	3.5e-12	-2.876	0.0007877	-0.558206	0.9308
MVLG_05108	0	0	55.57	89.41	14.85	8.93	8.86	8.79	19.32	54.97	88.26	394.01	304.06	399.11	12.63	8.369e-45	NA	NA	9.521	8.521e-09	12.35	3.551e-48	14.58	2.249e-43	-2.6229	1.879e-07	-3.122	7.536e-12	-0.647765	0.1043	2.23615	9.125e-07	-0.4696	1	2.069	0.0001293	4.875	4.223e-17	2.55049	2.098e-07	5.35	1.45e-20	-2.86841	5.897e-13
MVLG_01294	48.33	35.02	2.09	0	14.67	8.48	18.78	14.19	14.92	24.26	15.65	41.79	7.67	6.02	-5.183	1.211e-33	-1.776	1.211e-07	-1.284	4.503e-05	-1.316	4.765e-05	-1.933	0.0006118	3.38489	1.898e-07	3.867	1.735e-12	3.80563	2.77e-12	3.13618	2.322e-05	0.48	0.9491	0.4389	0.4221	-0.1904	0.992	-0.025941	0.9671	-0.6559	0.7207	0.567725	0.7533
MVLG_05789	1.6	2.24	35.12	12.61	103.79	76.62	23.52	59.5	3.32	9.84	7.15	0	46.68	23.17	3.756	1.3e-21	5.613	9.38e-54	4.399	6.073e-33	1.811	4.32e-06	4.127	1.516e-15	1.88889	1.898e-07	0.6441	0.1458	-2.00433	4.98e-07	0.334619	1	-1.212	0.03719	-3.828	2.489e-25	-1.55	0.0002689	-2.624	1.815e-12	-0.3706	0.3673	-2.30394	5.128e-06
MVLG_03859	0.67	0.6	1405	1407.25	462.55	555.48	138.69	355.47	10.9	13.25	50.4	1372.44	1448.02	2034.45	11.23	3.066e-157	9.721	1.603e-108	8.629	5.938e-91	5.211	5.918e-32	11.38	6.565e-70	-1.47661	2.088e-07	-2.602	3.063e-18	-6.08066	1.327e-63	0.111979	0.9836	-1.1	0.02514	-4.526	1.906e-37	1.61	0.0005511	-3.42495	9.479e-23	2.699	1.559e-09	-6.18081	4.157e-45
MVLG_01911	178.56	174.12	181.65	227.16	58.18	74.3	45.57	51.94	29.53	34.08	41.26	329.63	335.75	447.91	0.3508	0.215	-1.323	1.208e-05	-1.826	3.41e-09	-2.451	1.363e-14	1.16	0.003595	-1.63908	2.11e-07	-2.176	8.829e-12	-2.86023	5.692e-18	0.769257	0.2352	-0.5135	0.8471	-1.146	0.002943	2.426	2.185e-07	-0.625169	0.1461	2.933	2.727e-10	-3.60111	1.793e-19
MVLG_05835	4.63	4	94.94	0	0	0	0	2.35	0	12.45	19.41	0	205.8	258.71	3.623	1.849e-14	-7.717	0.02247	-2.511	0.108	1.529	0.0006138	5.684	1.161e-28	-7.2581	2.11e-07	-5.776	1.427e-10	-2.14642	2.07e-06	2.02465	0.0009163	NA	NA	8.224	0.001212	8.95	2.324e-12	3.9876	0.001808	7.688	1.494e-14	-4.16095	2.83e-20
MVLG_01533	30.96	35.89	34.12	18.77	142.86	59.88	171.98	151.7	68.24	82.19	81.6	109.22	48.04	44.33	-0.2056	0.5853	1.652	7.781e-08	2.314	2.683e-14	1.098	0.001747	0.8023	0.06339	1.88483	2.792e-07	2.521	4.712e-13	1.24969	0.002439	0.957803	0.1735	0.6545	0.5364	-0.5701	0.1829	-0.8946	0.3061	-1.20978	0.000942	-1.544	0.005103	0.284534	0.8247
MVLG_00253	170.57	158.05	593.92	666.67	198.86	244.98	57.27	129.86	75.21	41.44	105.74	85.82	545.15	645.98	2.081	2.041e-15	0.5277	0.08275	-0.7986	0.01393	-1.263	0.0001073	1.6	7.619e-05	-1.51733	2.907e-07	-2.879	3.522e-20	-3.39408	9.784e-25	-0.521872	0.3984	-1.331	0.006149	-1.802	2.763e-07	1.006	0.09777	-0.470392	0.2913	2.316	1.016e-06	-2.83855	7.373e-13
MVLG_00315	142.25	197.35	120.53	75.23	356.44	247.65	519.63	320.08	139.04	512.02	405.05	119.47	146.71	85.96	-0.6662	0.01983	0.8931	0.002183	1.339	5.535e-06	0.9617	0.005941	-0.4439	0.3016	1.5925	2.907e-07	2.008	1.368e-10	1.56492	2.053e-05	0.181431	0.9588	0.4334	0.872	0.04458	0.9553	-1.394	0.004049	-0.377323	0.4023	-1.826	3.219e-05	1.42007	0.000967
MVLG_01456	48.56	44.86	6.66	34.87	109.97	172.47	65.03	182.91	57.07	8.55	13.07	43.35	21.17	9.56	-1.028	0.04653	1.723	2.019e-06	1.387	4.675e-05	-1.144	0.008805	-1.107	0.1815	2.75741	2.933e-07	2.392	4.652e-06	-0.162515	0.9682	NA	NA	-0.3367	1	-2.864	1.332e-09	-2.858	0.0001887	-2.53031	2.733e-08	-2.572	0.0006969	0.0612601	0.952
MVLG_02682	0.4	0.68	353.27	432.22	114.33	155.2	33.98	76.23	8.96	5.96	13.86	318.48	231.62	153.48	9.61	1.137e-113	8.022	4.649e-68	6.627	2.416e-49	4.009	8.114e-19	8.71	1.958e-41	-1.55226	3.819e-07	-2.985	3.904e-20	-5.65867	2.41e-53	-0.934445	0.09995	-1.399	0.006149	-4.029	5.294e-27	0.6439	0.3717	-2.6356	6.661e-12	2.016	3.885e-05	-4.70756	2.847e-27
MVLG_00252	2042.16	2547	317.87	501.54	63.25	90.96	51.48	83.86	1680.89	406.02	818.63	1149.05	512.8	379.52	-2.343	1.725e-16	-4.759	4.301e-37	-5.067	2.298e-41	-1.077	0.001092	-1.733	2.548e-05	-2.37112	3.848e-07	-2.718	4.843e-10	1.22423	0.001422	0.56029	0.5327	-0.3145	1	3.674	1.476e-15	2.953	6.716e-07	3.99645	1.431e-18	3.254	9.479e-09	0.6616	0.2718
MVLG_03603	52.13	39.73	964.42	928.1	337.18	367.75	109.99	241.19	58.48	82.76	101.94	1087.78	1576.89	1905.85	4.506	5.687e-56	3.03	4.162e-25	1.978	3.143e-11	0.7055	0.04932	5.139	2.487e-31	-1.43978	4.698e-07	-2.524	2.911e-17	-3.85856	1.408e-31	0.593997	0.4106	-1.06	0.03441	-2.343	2.985e-12	2.054	4.335e-06	-1.27768	0.0003566	3.105	5.357e-12	-4.42586	7.397e-28
MVLG_01830	69.95	59.99	148.91	129.41	54.29	44.61	24.92	30.9	23.29	35.44	25.17	85.44	134.49	119.46	1.234	2.613e-06	-0.3194	0.3222	-1.195	0.0001203	-1.355	2.622e-05	0.9005	0.03094	-1.51824	6.523e-07	-2.425	1.04e-14	-2.64782	5.183e-16	-0.371208	0.6971	-0.8826	0.2087	-1.057	0.005096	1.163	0.03724	-0.165263	0.7512	2.037	1.747e-05	-2.23981	1.583e-08
MVLG_03161	1.87	2	497.78	494.54	171.69	192.88	78.34	108.71	13.6	23.31	37.29	398.13	794.88	860.73	8.133	4.993e-118	6.638	8.084e-75	5.621	1.265e-54	3.579	2.841e-20	8.567	8.362e-57	-1.45907	6.528e-07	-2.51	1.472e-16	-4.61297	1.581e-41	0.394113	0.725	-1.027	0.05618	-3.078	3.543e-19	1.871	4.955e-05	-2.04667	4.35e-09	2.89	1.832e-10	-4.98449	7.289e-33
MVLG_07010	0.55	0.27	32409.9	40812.7	12628.5	15341.4	2681.89	10391.6	453.34	360.02	1500.83	26171.9	19394.4	22057.9	16.5	4.128e-213	15.08	1.231e-158	13.96	1.034e-135	10.87	6.664e-76	15.78	2.314e-86	-1.38963	7.828e-07	-2.546	2.625e-18	-5.71416	2.332e-59	-0.733483	0.197	-1.133	0.01291	-4.246	6.727e-35	0.6798	0.2904	-3.10586	5.533e-20	1.806	5.138e-05	-4.96048	1.896e-33
MVLG_03369	57.75	51.96	145.75	316.88	418.13	883.75	380.01	510.61	73.57	40.25	82.08	187.39	43.62	70.68	2.222	1.907e-15	3.693	4.378e-34	3.077	1.882e-23	0.173	0.6705	0.5121	0.2128	1.50491	7.863e-07	0.8508	0.01474	-2.1047	8.081e-10	-1.76175	0.003437	-0.6303	0.5356	-3.532	3.54e-24	-3.221	1.905e-10	-2.89461	9.992e-17	-2.595	7.042e-07	-0.362144	0.4819
MVLG_06963	53.56	32.3	8.65	17.28	73.29	52.71	97.07	59.1	126.73	193.36	143.22	39.64	63.02	18.24	-1.573	3.764e-05	0.6404	0.06424	0.9405	0.003472	1.769	3.638e-07	0.09571	0.9614	2.23382	7.871e-07	2.508	1.942e-09	3.27871	3.524e-14	1.61673	0.02955	0.2859	1	1.107	0.008424	-0.6036	0.4924	0.839094	0.04379	-0.8818	0.1626	1.69149	0.0002073
MVLG_05093	0.16	0.22	86.26	50.96	259.14	160.98	270.31	208.72	204.46	653.38	426.77	0	115.89	134.59	8.563	8.976e-61	10.11	1.111e-83	10.27	3.549e-90	10.98	2.504e-86	9.093	4.154e-32	1.577	8.245e-07	1.714	1.105e-07	2.3487	1.996e-10	0.508751	0.8313	0.1547	1	0.8423	0.03585	-1.065	0.01225	0.700202	0.09577	-1.22	0.002154	1.90174	2.017e-07
MVLG_01961	14.76	13.25	156.82	152.77	50.15	54.85	31.37	44.16	8.08	9.26	6.88	0	38.92	43.2	3.603	7.317e-37	1.991	3.473e-10	1.447	5.819e-06	-0.9165	0.008281	1.429	0.005987	-1.57603	8.607e-07	-2.154	3.34e-11	-4.57874	2.83e-38	-2.21011	5.049e-09	-0.5519	0.8173	-2.929	7.733e-15	-0.6275	0.212	-2.37219	2.127e-10	-0.0905	0.725	-2.31514	1.984e-06
MVLG_04455	0	0.59	484.14	427.22	95.89	159.54	34.88	153.93	9.26	9.89	27.92	0	219.34	282.77	10.56	3.843e-73	8.689	6.509e-23	8.022	8.816e-25	5.73	7.647e-18	9.584	4.389e-23	-1.82963	9.934e-07	-2.543	7.16e-11	-4.91256	3.826e-38	-0.973797	0.02442	-0.6654	0.9282	-3.005	4.663e-11	0.8599	0.4924	-2.37001	7.66e-08	1.461	0.06303	-3.89841	4.975e-16
MVLG_04243	29.77	21.31	21.95	19.97	35.45	123.62	20.45	76.14	20.62	28.07	22.74	0	27.94	30.86	-0.1384	0.7629	1.765	3.273e-08	0.8772	0.006848	-0.1803	0.6283	0.1714	0.8762	1.93761	1.045e-06	1.01	0.01967	-0.101436	0.8433	0.267688	1	-0.8907	0.3541	-1.971	1.407e-07	-1.657	0.0003526	-1.09789	0.005721	-0.8131	0.08113	-0.333268	0.9697
MVLG_02008	238.58	295.45	366.67	855.3	1357.96	1894.24	1421.92	1576.19	151.85	145.41	318.17	417.34	153.2	147.14	1.331	3.873e-07	2.703	3.153e-21	2.535	1.334e-17	-0.4654	0.1853	-0.3137	0.6311	1.40304	1.171e-06	1.198	0.0001074	-1.85639	1.286e-08	-1.6932	0.0002534	-0.182	1	-3.181	2.908e-21	-3.057	1.698e-12	-2.99174	1.122e-18	-2.877	3.421e-11	-0.169649	0.752
MVLG_04934	156.4	138.43	23.71	16.75	80.03	79.86	81.1	96.53	110.13	77.26	65.22	48.2	41.65	42.57	-2.723	2.184e-17	-0.7961	0.01205	-0.6938	0.0298	-0.9375	0.005112	-1.674	8.643e-05	1.95596	1.194e-06	2.028	1.317e-07	1.73643	3.062e-05	1.00097	0.2339	0.09223	1	-0.1564	0.7807	-0.9338	0.2026	-0.237009	0.6459	-1.032	0.09099	0.750535	0.1985
MVLG_01690	355.01	228.67	53.79	44.76	335.63	134.61	184.84	183.06	46.31	60.64	54.34	101.44	81.12	76.13	-2.382	2.672e-11	-0.2194	0.5344	-0.5593	0.09726	-2.306	1.339e-12	-1.551	0.001046	2.18333	1.519e-06	1.82	7.113e-05	0.0168813	1	0.780986	0.574	-0.346	0.9799	-2.106	7.628e-08	-1.381	0.04188	-1.74704	5.558e-06	-1.036	0.1366	-0.752388	0.2567
MVLG_00590	292.16	332.06	3.76	2.81	18.69	36.13	39.39	56.19	40.6	65.69	64.81	0	14.56	15.92	-6.434	1.283e-56	-3.414	1.336e-24	-2.697	2.822e-17	-2.544	1.045e-15	-4.366	3.574e-25	3.00831	1.645e-06	3.706	4.431e-12	3.82762	7.367e-13	1.97832	0.1656	0.7048	0.6605	0.8465	0.08064	-1.012	0.1312	0.142001	0.8577	-1.732	0.0005839	1.83616	2.963e-05
MVLG_00650	130.36	111.5	1135.21	1077.57	394.69	462.64	141.46	189.1	32.97	58.61	44.7	349.54	699.23	863.78	3.365	2.107e-35	1.945	7.362e-12	0.476	0.1265	-1.56	1.101e-06	2.47	5.624e-10	-1.38303	1.801e-06	-2.886	1.055e-21	-4.98616	2.916e-47	-0.933841	0.04797	-1.479	0.0005119	-3.528	1.015e-24	0.4667	0.5775	-2.04237	4.308e-09	1.938	2.652e-05	-4.01862	2.055e-23
MVLG_03608	180.92	190.59	471.19	963.6	1264.9	2366.4	1502.94	2057.18	134.43	185.46	329.83	301.02	377.99	458.9	2.087	1.089e-15	3.391	2.947e-31	3.302	1.7e-27	0.0915	0.8355	1.115	0.005058	1.33877	2.624e-06	1.211	7.062e-05	-2.05814	1.591e-10	-1.01524	0.02742	-0.1043	1	-3.316	5.331e-23	-2.332	3.447e-09	-3.2061	3.756e-21	-2.235	1.599e-08	-1.01201	0.01896
MVLG_05629	304.74	236.13	100.8	148.3	35.67	41.87	14.45	46.37	22.43	16.25	21.77	46.79	195.08	301.58	-0.9721	0.0004102	-2.708	4.339e-17	-3.228	2.498e-21	-3.868	2.593e-31	-0.2966	0.3756	-1.70076	2.624e-06	-2.261	9.233e-10	-2.95247	2.076e-17	0.635385	0.5171	-0.5161	0.9727	-1.176	0.007991	2.342	6.181e-06	-0.676122	0.1368	2.81	4.734e-08	-3.53999	1.844e-17
MVLG_04194	16.01	15.35	12.24	14.72	72.4	17.83	83.48	35.1	84.36	74.04	97.24	28.51	37.71	24.02	-0.08313	0.8386	1.563	2.863e-07	1.959	8.971e-11	2.284	7.503e-11	1.03	0.01999	1.6699	2.699e-06	2.041	2.509e-09	2.31309	1.556e-09	1.0687	0.1059	0.3862	0.9491	0.7091	0.08918	-0.5871	0.4397	0.345617	0.4666	-0.9621	0.07216	1.26968	0.004095
MVLG_00628	2.65	2.1	36.42	29.05	130.99	70.72	203.13	122.25	94.69	238.99	159.23	28.34	73.29	70.45	3.921	3.74e-31	5.469	1.439e-55	6.136	2.214e-64	5.999	1.267e-45	4.84	7.316e-24	1.57846	3.109e-06	2.217	9.943e-12	2.01417	8.233e-08	0.880266	0.2607	0.6558	0.5143	0.5052	0.2533	-0.6893	0.2467	-0.136065	0.8046	-1.342	0.002294	1.18245	0.004027
MVLG_02288	0.12	0	139.68	175.83	52.56	40.37	15.01	46.45	7.46	6.66	15.81	136.14	230.21	163.7	11.21	3.097e-68	9.382	1.638e-20	8.596	5.647e-21	7.117	5.708e-22	11.37	6.236e-33	-1.78861	3.135e-06	-2.621	4.322e-11	-4.20515	7.521e-30	0.1922	0.9781	-0.7866	0.851	-2.337	4.043e-07	1.992	0.0003601	-1.57135	0.0005897	2.725	5.94e-07	-4.36617	8.691e-23
MVLG_00556	6.33	5.12	21.2	21.92	34.82	115.24	27.46	140.51	6.38	1.5	3.38	123.6	52.04	112.68	2.054	6.296e-08	3.831	1.841e-29	3.868	1.564e-30	-1.014	0.0288	4.043	1.189e-18	1.81171	3.233e-06	1.811	1.198e-06	-3.11725	1.426e-10	1.94015	0.0001738	0.03202	1	-4.851	1.427e-29	0.1579	0.9262	-4.89073	3.141e-31	0.09553	0.9606	-4.99976	1.422e-24
MVLG_03715	55.84	58.63	132.88	63.64	31.2	24.37	12.73	21.14	2.94	3.69	6.16	27.33	61.2	54.76	0.917	0.001662	-0.9657	0.01076	-1.804	1.696e-06	-3.76	4.636e-27	0.04455	0.9792	-1.83968	3.793e-06	-2.711	1.267e-11	-4.72852	2.81e-34	-0.908938	0.1231	-0.839	0.7147	-2.81	1.045e-08	0.9422	0.3264	-1.97463	3.384e-05	1.755	0.008299	-3.78751	2.84e-15
MVLG_00432	127.58	109.68	112.39	74.32	326.05	262.9	843.3	380.59	404.12	940.38	642	157	160.35	102.26	-0.1895	0.5914	1.403	3.087e-06	2.437	5.937e-16	2.472	2.434e-12	0.3676	0.4822	1.62531	3.895e-06	2.629	1.665e-15	2.60061	9.227e-12	0.515736	0.6587	1.019	0.06249	1.045	0.008583	-1.091	0.06797	0.0398901	0.9525	-2.106	3.706e-06	2.11677	7.283e-07
MVLG_02904	201.42	198.05	301.25	311.89	501.01	1088.14	659.57	1054.73	97.9	147.15	166.7	489.8	228.31	456.05	0.7641	0.005586	2.116	1.163e-13	2.16	2.691e-13	-0.5804	0.0915	1.025	0.01179	1.39133	4.359e-06	1.399	8.096e-06	-1.40337	3.935e-05	0.219919	0.8967	0.02996	1	-2.716	9.949e-16	-1.141	0.02811	-2.74157	6.826e-16	-1.179	0.01547	-1.60447	0.0001029
MVLG_03051	7.32	4.13	43.66	9.9	109.35	76.38	25.79	39.61	126.31	169.63	151.7	36.3	69.98	47.32	2.374	6.305e-10	4.103	4.739e-33	2.518	2.465e-12	4.616	1.597e-31	3.414	4.035e-13	1.76193	4.49e-06	0.1503	0.7894	2.1893	3.05e-08	1.00219	0.248	-1.585	0.002379	0.4922	0.2874	-0.7475	0.2639	2.08114	3.577e-07	0.817	0.33	1.21993	0.006003
MVLG_01824	0.14	0.03	565.06	637.05	198.84	274.18	62.94	173.53	12.93	9.72	36.82	585.44	614.18	615.23	12.8	3.147e-134	11.41	1.567e-90	10.34	5.509e-75	7.671	2.656e-41	12.72	3.455e-58	-1.35247	5.168e-06	-2.459	1.045e-15	-5.20671	1.034e-49	-0.095891	0.9836	-1.077	0.04152	-3.777	6.363e-27	1.278	0.01168	-2.70094	1.555e-14	2.337	2.932e-07	-5.09496	1.912e-33
MVLG_04936	19.13	24.41	45.67	188.14	30.52	34.85	5.2	19.58	2881.33	772.06	2160.79	1920.05	766.5	145.17	2.56	1.275e-17	0.6707	0.1209	-1.044	0.049	6.362	6.53e-51	5.33	1.464e-31	-1.85664	5.374e-06	-3.602	1.665e-15	3.75187	2.169e-22	2.72823	4.01e-10	-1.7	0.09914	5.684	2.089e-36	4.616	2.946e-19	7.37777	2.014e-47	6.255	2.053e-27	1.02512	0.02434
MVLG_00888	300.47	287.37	747.34	985.74	1902.98	2572.61	2162.16	2622.19	597.07	498.32	595.68	949.06	450.23	464.33	1.721	4.423e-10	3.077	2.753e-25	3.143	1.128e-24	1.127	0.001224	1.175	0.005219	1.39096	7.01e-06	1.422	6.909e-06	-0.648545	0.08786	-0.590634	0.5385	0.05281	1	-1.965	8.891e-09	-1.953	2.95e-05	-2.00821	4.638e-09	-2.009	1.117e-05	-0.045511	0.9381
MVLG_00856	35.27	30.15	18.21	15.82	38.83	99.8	66.97	164.94	41.94	34.94	42.73	59.6	23.83	46.39	-0.7976	0.05044	1.199	0.0003965	1.842	3.074e-09	0.1891	0.6455	0.286	0.5551	2.02493	7.59e-06	2.634	2.284e-11	0.932893	0.06059	1.02805	0.2683	0.6333	0.6394	-1.03	0.01498	-0.9674	0.3018	-1.66521	5.731e-06	-1.619	0.006504	-0.102005	0.8614
MVLG_01293	7.78	9.15	357.32	356.97	1147.72	764.42	1390.71	1275.86	226.73	645.1	588.82	208.47	362.8	517.35	5.543	4.799e-64	6.893	7.512e-81	7.359	1.079e-83	5.852	7.714e-44	5.711	3.789e-31	1.38131	7.59e-06	1.818	3.167e-09	0.244504	0.6008	0.128852	1	0.4564	0.8326	-1.064	0.003251	-1.242	0.00684	-1.5097	1.361e-05	-1.699	3.963e-05	0.161234	0.7748
MVLG_03382	0.88	0.86	5.03	0	58.1	35.7	49.17	26.85	25.27	17.6	13.86	0	12.31	0	1.679	0.5936	5.801	1.944e-14	5.569	1.869e-21	4.339	2.222e-19	NA	NA	3.98801	8.113e-06	3.786	7.298e-06	2.58671	0.003716	NA	NA	-0.2481	1	-1.484	0.008371	-2.546	0.001646	-1.20843	0.02103	-2.3	0.002853	1.11057	0.06284
MVLG_02959	0.9	0.77	164.13	153.76	50.65	66.86	20.94	46.06	97.02	243.34	142.74	144.27	182.99	171.2	7.706	5.859e-99	6.224	1.41e-56	5.306	9.084e-42	7.478	8.453e-59	7.731	9.921e-44	-1.44458	8.761e-06	-2.399	6.27e-13	-0.294253	0.4735	-0.0116073	1	-0.9214	0.2564	1.226	0.002135	1.45	0.005823	2.14154	7.564e-08	2.344	1.495e-06	-0.241808	0.7424
MVLG_04566	333	370.5	447.75	547.07	904.88	1546	758.64	1899.96	294.16	412.1	502.88	429.51	381.48	692.52	0.6398	0.01832	1.909	1.176e-11	1.977	1.559e-11	0.1264	0.7689	0.6501	0.1319	1.30668	1.019e-05	1.339	1.312e-05	-0.572638	0.1249	-0.0309366	1	0.05582	1	-1.801	9.875e-08	-1.315	0.003764	-1.85053	5.624e-08	-1.38	0.00151	-0.509328	0.3517
MVLG_01782	825.1	965.53	2590.72	5252.77	6609.56	12012	7909.8	12887.1	1921.34	2030.86	3898.03	3000.24	1865.97	2194.01	2.267	3.066e-18	3.48	1.119e-32	3.584	1.792e-31	1.423	3.539e-05	1.43	0.0002126	1.24758	1.372e-05	1.314	1.149e-05	-0.904067	0.008665	-0.874961	0.0827	0.08991	1	-2.071	4.673e-10	-2.096	1.506e-07	-2.15454	1.483e-10	-2.195	2.811e-08	0.0004801	1
MVLG_00621	38.77	33.71	109.16	76.21	16.84	25.34	7.34	9.48	36.84	35.66	24.5	0	40.42	67.19	1.506	1.33e-06	-0.6772	0.181	-2.116	1.067e-05	-0.225	0.5745	0.5655	0.6362	-2.13468	1.406e-05	-3.594	1.162e-13	-1.78595	2.47e-06	-0.978077	0.06568	-1.431	0.4946	0.4303	0.5613	1.165	0.4279	1.88718	0.001245	2.588	0.001384	-0.766766	0.4983
MVLG_04106	0.23	0.22	12956.9	9811.65	6028.81	3760.96	972.69	2848.14	123.92	95.84	268	15716.5	11166.5	17341.3	15.49	3.563e-162	14.2	7.272e-117	12.85	4.418e-94	9.435	5.189e-45	15.88	6.782e-75	-1.25806	1.556e-05	-2.644	7.006e-19	-6.16265	1.135e-64	0.420425	0.6587	-1.362	0.001594	-4.833	1.391e-41	1.698	0.000201	-3.46245	4.611e-23	3.052	1.062e-11	-6.56561	3.855e-49
MVLG_01500	186.68	131.02	40.84	42.41	159.97	110.2	212.16	206.75	31.98	62.76	57.56	100.63	71.66	66.27	-1.78	9.155e-09	-0.1496	0.6769	0.457	0.1499	-1.678	1.446e-07	-0.9857	0.03102	1.65908	1.56e-05	2.237	2.229e-10	0.0402772	0.9861	0.748243	0.3974	0.5972	0.6587	-1.55	2.932e-05	-0.8877	0.2407	-2.13719	8.464e-10	-1.484	0.004674	-0.696768	0.2023
MVLG_05598	52.98	48.03	110.43	97.14	323	222.19	412.57	347.46	307.16	376.49	305.37	92.87	135.84	165.38	1.178	2.405e-05	2.503	1.015e-17	2.954	2.568e-22	2.591	2.483e-13	1.552	0.0001961	1.35702	1.733e-05	1.778	1.116e-08	1.35683	0.0002162	0.334351	0.8594	0.4402	0.859	0.06934	0.9126	-1.01	0.04985	-0.356483	0.4346	-1.45	0.0008908	1.06029	0.01248
MVLG_05795	59.69	48.17	767.81	768.95	261.85	374.49	115	199.09	55.97	45.88	76.37	221.18	422.99	471.1	3.976	1.359e-45	2.662	7.912e-20	1.581	1.337e-07	0.02706	0.9631	2.939	5.76e-13	-1.27526	1.99e-05	-2.391	2.726e-15	-4.0013	6.922e-33	-1.07483	0.01443	-1.091	0.03178	-2.65	8.15e-15	0.2173	0.8975	-1.55371	1.262e-05	1.296	0.01008	-2.89516	2.068e-13
MVLG_05516	101.31	105.69	79.38	192	352.42	361.08	394.98	333.28	90.19	90.83	154.55	48.02	69.75	61.48	0.5314	0.07203	1.873	9.924e-11	1.863	3.42e-10	0.03203	0.9561	-0.5729	0.1851	1.36993	2.021e-05	1.326	5.413e-05	-0.560214	0.1538	-1.14869	0.03352	-0.02303	1	-1.856	8.146e-08	-2.504	2.791e-08	-1.82187	1.404e-07	-2.483	2.429e-08	0.62027	0.2541
MVLG_04663	19.95	14.07	14.64	15.5	60.67	36.83	76.36	54.11	75.83	90.9	68.94	25.19	51.68	26.94	-0.03118	0.9624	1.591	3.976e-07	1.988	8.23e-11	2.075	3.387e-09	1.23	0.006503	1.6497	2.297e-05	2.019	2.381e-08	2.04837	2.271e-07	1.21867	0.07977	0.3861	0.9578	0.4656	0.3179	-0.4196	0.5936	0.0961809	0.8774	-0.8029	0.1402	0.867195	0.06167
MVLG_01957	0.52	0	97.91	309.16	29.66	60.82	7.72	37	8.44	0.61	7.35	340.62	124.87	77.44	9.586	7.202e-40	NA	NA	NA	NA	3.915	1.945e-06	8.977	2.113e-15	-2.13074	2.332e-05	-3.581	3.711e-11	-5.75929	3.932e-31	-0.609874	0.7532	-1.406	0.7962	-3.531	6.319e-05	1.542	0.04636	-2.12321	0.03065	2.902	0.0001593	-5.07416	3.188e-17
MVLG_06973	0.34	0.24	469.04	605.8	221.73	228.23	96.39	177.26	11.89	11.51	34.46	345.28	557.25	345.8	10.97	5.578e-129	9.656	2.37e-87	8.888	2.187e-77	5.955	2.293e-35	10.55	1.24e-52	-1.2776	2.418e-05	-2.081	9.535e-12	-5.07654	1.293e-47	-0.450954	0.574	-0.7769	0.299	-3.723	3.603e-26	0.8435	0.1741	-2.94298	5.012e-17	1.609	0.0007471	-4.60613	2.177e-28
MVLG_01154	86.16	72.33	10.16	13.71	25	98.05	37.79	87.83	21.86	15.82	14.92	21.06	11.37	10.2	-2.581	3.407e-10	-0.2355	0.5393	-0.3603	0.3973	-2.277	1.857e-11	-2.619	1.128e-05	2.36047	2.559e-05	2.204	1.323e-05	0.24661	0.7745	-0.0841197	1	-0.1318	1	-2.062	3.481e-06	-2.422	0.002367	-1.93957	2.134e-06	-2.331	0.001336	0.35826	0.8558
MVLG_02363	44.71	59.49	84.25	213.81	322.15	448.76	250.87	294	93.8	64.74	132.77	223.31	44.49	82.03	1.651	7.58e-09	2.982	2.35e-23	2.429	1.603e-15	0.8128	0.02298	0.7825	0.05883	1.36174	2.583e-05	0.7719	0.03615	-0.895532	0.01688	-0.924777	0.3696	-0.5668	0.6618	-2.182	2.716e-10	-2.239	4.189e-05	-1.60665	6.182e-06	-1.672	0.004487	-0.0003494	0.8843
MVLG_02795	7.05	8.43	37.1	44.62	75.81	168.33	114.41	265.68	21.61	31.88	29.12	30.36	29.53	173.71	2.535	1.911e-12	4.085	1.498e-33	4.644	2.666e-42	1.768	1.37e-06	3.639	8.024e-15	1.58361	2.896e-05	2.106	1.733e-09	-0.828119	0.04985	1.0568	0.1695	0.5474	0.7223	-2.341	1.6e-10	-0.5086	0.4919	-2.8882	2.543e-16	-1.071	0.02821	-1.85955	5.018e-05
MVLG_01629	878.43	902.15	780.25	1057.79	2289.31	2205.08	3194	2094.79	1614.02	1468.42	1108.46	668.01	811.03	797.57	0.2045	0.4938	1.451	2.874e-07	1.67	1.218e-08	0.7488	0.03418	0.06762	0.9672	1.27912	2.916e-05	1.464	2.177e-06	0.488947	0.2249	-0.177901	0.9103	0.205	1	-0.719	0.06152	-1.442	0.001283	-0.909697	0.01554	-1.648	9.916e-05	0.70353	0.1299
MVLG_03617	124.43	261.96	32.24	15.51	43.08	126.1	104.75	224.81	278.31	188.34	246.51	207.47	61.8	119.26	-2.892	1.445e-18	-1.091	0.0006249	-0.2194	0.5575	0.185	0.6444	-0.7534	0.1443	1.83157	3.047e-05	2.668	2.423e-12	3.0302	2.54e-13	2.07901	0.0001256	0.8587	0.2674	1.261	0.002092	0.2826	0.7625	0.404075	0.4218	-0.5874	0.4974	0.930937	0.1064
MVLG_02150	239.28	437.47	15.81	16.02	54.27	88.16	97.59	169.29	262.44	113.97	282.74	196.9	100.03	163.69	-4.28	4.02e-33	-2.159	2.789e-11	-1.331	2.366e-05	-0.7158	0.03581	-1.138	0.008048	2.13997	3.409e-05	2.936	1.182e-11	3.51731	5.588e-15	3.0727	6.179e-08	0.8167	0.3893	1.433	0.000658	0.9587	0.1741	0.618416	0.1823	0.1303	0.9072	0.428775	0.5441
MVLG_05122	7.86	5.78	42456.5	47843.5	19412.9	20289.3	3492.76	11712.4	340.21	508.32	2195.26	48796.6	40691.8	66025.6	12.85	3.035e-214	11.62	1.519e-163	10.21	8.02e-128	7.276	7.031e-58	13.07	1.241e-97	-1.19775	3.453e-05	-2.633	1.74e-19	-5.63416	3.957e-58	0.183656	0.9292	-1.413	0.0005349	-4.357	1.724e-36	1.404	0.003007	-2.93841	3.366e-18	2.812	1.787e-10	-5.79869	3.402e-42
MVLG_00957	127.95	118.94	2.41	0.8	22.33	11.33	33.34	24.42	44.15	61.4	56.24	9.75	15.3	6.21	-6.124	5.694e-41	-2.806	1.256e-15	-2.031	1.583e-10	-1.301	5.809e-05	-3.342	4.53e-13	3.26838	4.02e-05	4.04	1.368e-10	4.7608	2.406e-16	2.65249	0.01413	0.7597	0.6932	1.487	0.001243	-0.5917	0.6629	0.742391	0.1038	-1.346	0.05115	2.05799	9.54e-05
MVLG_07102	64.6	75.3	57.69	44.54	131.29	160.51	86.56	144.26	211.32	211.92	288.02	206.4	97.49	293.96	-0.3161	0.3546	1.15	0.0001638	0.7452	0.01707	1.664	1.544e-06	1.596	0.0001004	1.49953	4.104e-05	1.062	0.005427	1.92751	4.792e-07	1.86699	0.0001243	-0.4131	0.9491	0.4984	0.2722	0.3907	0.7027	0.915299	0.0291	0.7911	0.2019	0.0771963	0.9372
MVLG_03723	77.71	315.38	4.37	15.63	13.88	67.17	68.48	54.95	287.63	82.85	300.83	307.75	109.33	33.7	-4.188	2.098e-34	-2.19	4.892e-12	-1.65	6.405e-08	0.01416	0.9813	-0.7212	0.1791	2.01971	4.228e-05	2.524	2.475e-09	4.15402	1.307e-21	3.39229	1.666e-10	0.5155	0.8734	2.194	3.824e-08	1.42	0.009954	1.69207	1.212e-05	0.9118	0.09048	0.710419	0.2901
MVLG_05121	0	0	10151.9	16749.8	4617.79	7124.75	1113.73	3597.35	153.05	118.89	272.13	2971.65	5127.45	3807.32	19.03	6.513e-187	17.79	6.999e-140	16.47	5.746e-115	13	2.97e-55	16.99	8.628e-66	-1.18557	4.88e-05	-2.583	1.258e-18	-6.38851	1.211e-68	-1.74877	3.661e-06	-1.373	0.001053	-5.124	3.29e-46	-0.5423	0.4063	-3.74579	6.181e-27	0.8211	0.1365	-4.61614	2.306e-29
MVLG_06343	42.42	30.61	740.5	492.1	259.13	269.62	78.02	176.61	99.58	66.05	79.4	366.2	459.46	484.8	4.223	1.513e-49	2.95	4.892e-23	1.832	1.935e-09	1.042	0.002915	3.7	1.482e-18	-1.23403	5.8e-05	-2.384	1.316e-14	-3.22748	1.225e-22	-0.558023	0.422	-1.122	0.03175	-1.921	3.283e-08	0.6951	0.3163	-0.794113	0.04655	1.8	0.0001485	-2.6409	1.98e-11
MVLG_06680	216.39	245.89	53.71	45.25	197.88	181.05	177.23	131.5	288.6	379.83	304.11	140.83	101.64	122.51	-2.062	8.551e-09	-0.1834	0.6361	-0.4721	0.1561	0.5617	0.1255	-0.7555	0.1259	1.90219	5.993e-05	1.587	0.000624	2.56556	2.598e-09	1.25115	0.1432	-0.3035	0.9895	0.7252	0.1125	-0.6293	0.5262	1.0468	0.01204	-0.3175	0.7779	1.32652	0.009337
MVLG_05225	30.42	32.54	20.5	11.53	53.16	57.14	54.45	70.13	68.14	89.82	75.31	32.51	20	13.75	-0.8404	0.02382	0.8916	0.007946	1.008	0.001458	1.195	0.0006331	-0.6594	0.2875	1.76056	6.485e-05	1.847	6.087e-06	1.97968	2.635e-06	0.134508	0.9804	0.1069	1	0.2833	0.6056	-1.603	0.02044	0.182799	0.7774	-1.719	0.005371	1.85867	0.0007924
MVLG_00271	58.65	68.11	32.53	31.6	102.83	70.39	124.11	95	102.78	88.15	79.07	67.6	43.59	40.22	-0.8523	0.004245	0.5136	0.09969	0.8232	0.006941	0.3518	0.3519	-0.3943	0.469	1.39602	7.166e-05	1.676	5.53e-07	1.15129	0.003072	0.411406	0.7283	0.2983	0.9799	-0.1768	0.7293	-0.9589	0.1622	-0.458603	0.3029	-1.254	0.02081	0.75012	0.1898
MVLG_07217	0.82	1.54	197.35	185.5	77.02	82.67	44.45	70.77	18.27	45.43	40.99	157.33	468.35	564.93	7.465	2.734e-99	6.151	1.319e-61	5.616	1.457e-50	4.78	6.152e-31	8.528	1.258e-54	-1.27774	7.888e-05	-1.847	7.401e-09	-2.74628	5.747e-17	1.02383	0.05768	-0.5426	0.7758	-1.393	0.0001374	2.315	6.691e-07	-0.848622	0.02975	2.845	7.528e-10	-3.73614	6.871e-21
MVLG_03906	266.3	170.71	239.12	268.66	691.05	556.39	1158.18	708.12	294.77	808.38	590.76	193.11	470.49	599.87	0.3768	0.1996	1.611	1.852e-08	2.165	2.508e-13	1.364	8.021e-05	1.237	0.003204	1.26664	8.017e-05	1.789	7.588e-09	0.920955	0.01546	0.822099	0.2536	0.5415	0.6825	-0.2723	0.5493	-0.4345	0.5148	-0.802371	0.03626	-0.9759	0.03326	0.148519	0.7841
MVLG_02887	81.72	90.3	150.24	142.03	57.92	59.71	33.95	48.79	55.39	35.47	44.08	151.45	100.35	126.34	0.8976	0.0009544	-0.4692	0.1545	-1.045	0.001247	-1.09	0.001014	0.5643	0.1928	-1.3309	8.283e-05	-1.941	4.155e-09	-2.03716	1.16e-09	-0.37493	0.7677	-0.5835	0.7504	-0.6337	0.1434	0.9797	0.1206	-0.0432776	0.9373	1.551	0.002218	-1.64397	9.713e-05
MVLG_05354	5.99	6.36	114.05	134.92	43.97	29.88	4.64	32.46	14.73	6.93	4.96	0	98	78.93	4.476	6.382e-39	2.659	2.052e-07	1.274	0.01359	0.2701	0.4976	3.863	1.216e-13	-1.77721	8.341e-05	-3.194	6.056e-11	-4.26263	1.569e-24	-0.650444	0.2136	-1.364	0.549	-2.401	4.386e-05	1.132	0.3535	-1.05934	0.1224	2.413	0.003091	-3.52134	5.408e-11
MVLG_02071	2893.68	2173.55	33.19	0	68.41	77.96	26.67	51.81	35.82	3.94	5.76	758.09	55.23	72.94	-7.085	2.081e-85	-5.008	1.343e-50	-6.047	6.418e-61	-7.878	2.602e-85	-3.79	1.383e-17	2.09811	8.545e-05	1.033	0.06937	-0.826194	0.6873	3.21585	1.665e-08	-1.04	0.3777	-2.861	1.142e-08	1.205	0.02577	-1.81398	0.001061	2.227	3.101e-05	-4.06684	7.794e-16
MVLG_01791	0.12	0	0	1.03	20.6	11.94	70.68	58.65	80.46	55.66	48.4	37.86	15.09	0	NA	NA	7.987	1.26e-11	9.962	3.931e-53	9.742	1.039e-53	NA	NA	4.59861	8.654e-05	6.64	8.735e-21	6.52829	1.272e-18	NA	NA	1.952	0.0005563	1.7	0.0003371	-0.6028	0.8675	-0.2407	0.6633	-2.553	0.0002284	2.27753	0.0004094
MVLG_01851	2261.45	2325.79	59.55	97.01	173.99	260.87	131.06	250.87	1511.89	529.69	938.18	1095.1	303.57	106.7	-4.728	4.925e-54	-3.29	1.105e-27	-3.553	2.688e-29	-1.278	7.569e-05	-2.463	8.422e-10	1.46898	9.257e-05	1.17	0.002033	3.40405	3.024e-18	2.21405	2.112e-06	-0.2717	1	2.003	1.551e-07	0.7966	0.1791	2.28058	3.505e-09	1.055	0.04339	1.15401	0.02289
MVLG_01382	44.42	57.32	58.96	104.33	417.25	146.55	560.8	208.88	147.78	385.2	248.03	0	125.37	48.42	0.827	0.04657	2.537	1.483e-13	3.058	3.008e-21	2.502	4.052e-12	1.059	0.1726	1.73141	9.291e-05	2.227	1.66e-08	1.60721	0.0002074	0.186946	1	0.5057	0.8619	-0.05728	0.92	-1.537	0.001243	-0.540255	0.2257	-2.029	4.284e-06	1.47143	0.0002443
MVLG_07172	1.18	1.35	6.43	16.46	36.54	49.47	15.11	35.66	3.26	15.87	16.88	0	63.26	32.57	3.307	3.094e-09	5.167	6.939e-36	4.254	1.817e-24	3.257	2.212e-15	5.183	6.164e-20	1.88226	9.425e-05	0.935	0.07681	-0.119435	0.7827	1.82504	0.01746	-0.914	0.5093	-1.939	9.683e-07	-0.05301	0.8305	-1.0401	0.01047	0.8192	0.5514	-1.91998	0.0001814
MVLG_03286	40.26	31.47	534.42	484.05	1287.58	1035.49	1942.01	1680.64	631.96	873.2	832.34	155.07	363.37	415.49	3.971	5.296e-45	5.097	4.53e-58	5.703	2.826e-63	4.334	8.173e-30	3.296	2.245e-15	1.16079	0.0001004	1.736	4.177e-09	0.306108	0.4733	-0.712285	0.1988	0.5949	0.549	-0.7826	0.03679	-1.861	3.877e-06	-1.36506	9.356e-05	-2.457	3.149e-10	1.05873	0.009449
MVLG_01557	38.74	37.1	14.69	15.59	72.46	20.2	87.13	39.81	20.2	42.78	36.58	6.55	18.07	16.97	-1.188	0.0002642	0.3343	0.3454	0.7958	0.01165	-0.2982	0.4008	-1.118	0.007764	1.54717	0.000115	1.984	5.47e-08	0.827204	0.06526	0.0276113	1	0.4508	0.8954	-0.6521	0.1249	-1.506	0.005537	-1.08291	0.004103	-1.946	4.762e-05	0.834235	0.09765
MVLG_05128	121.16	150.92	391.74	245.61	744.3	689.65	1013.2	1002.54	236.01	277.41	342.01	151.46	234.81	394.26	1.354	2.128e-07	2.47	3.232e-18	2.921	2.151e-22	0.9273	0.007917	1.066	0.008823	1.15287	0.0001192	1.573	1.285e-07	-0.478869	0.2079	-0.326647	0.7427	0.4395	0.8471	-1.559	4.868e-06	-1.463	0.0006312	-1.98678	4.365e-09	-1.905	2.069e-06	-0.11939	0.9097
MVLG_00889	171.22	145.84	595.25	1022.75	1310.98	2243.99	1478.35	2258.82	309.25	322.62	589.31	690.11	422.95	408.8	2.495	2.888e-21	3.595	2.46e-34	3.612	8.439e-32	1.251	0.0002922	1.693	1.553e-05	1.13539	0.0001355	1.115	0.0003085	-1.30313	8.801e-05	-0.840811	0.1318	0.00321	1	-2.359	1.295e-12	-1.947	2.723e-06	-2.35548	2.613e-12	-1.958	2.073e-06	-0.440108	0.4127
MVLG_01224	70.86	42.8	45.25	51.28	323.9	166.61	205.89	183.03	228.25	206.04	175.67	0	148.91	233.85	-0.05601	1	2.234	3.676e-08	1.948	9.558e-08	2.125	4.722e-09	2.091	0.0002302	2.29824	0.0001367	1.992	0.0004434	2.1237	5.308e-05	2.07869	0.03569	-0.2957	1	-0.126	0.8544	-0.2018	0.7576	0.187588	0.7612	0.09744	0.9431	0.0556436	0.6921
MVLG_03000	5.75	3.33	78.88	21.36	23.27	6.25	11.99	1.02	11.59	35.4	4.99	23.74	17.6	16.49	3.611	1.806e-26	1.77	0.001077	0.8649	0.1644	1.92	2.53e-07	2.08	0.0002442	-1.79349	0.000145	-2.719	3.856e-11	-1.75656	2.204e-06	-1.56249	0.02062	-0.9186	0.616	0.1157	0.9175	0.2541	0.9009	1.08189	0.01854	1.223	0.1095	-0.170206	0.8512
MVLG_05749	68	64.63	9.58	6.68	12.71	55.3	31.02	42.25	105.19	71.85	130.18	128.4	46.2	45.74	-2.887	3.939e-14	-0.8469	0.01485	-0.8452	0.01424	0.5095	0.166	-0.1233	0.9943	2.06144	0.0001463	2.032	4.308e-05	3.34607	1.856e-13	2.69456	5.184e-06	-0.0128	1	1.338	0.001756	0.6676	0.3936	1.35368	0.001259	0.6724	0.3081	0.614399	0.4402
MVLG_02661	644	611.19	1663.32	3184.32	4024.31	6522.08	4449.07	6559.62	1085.18	1204.39	2142.74	1870.69	1174.63	1093.56	2.09	7.707e-16	3.173	4.885e-28	3.181	6.927e-26	1.112	0.001299	1.161	0.00283	1.11646	0.0001538	1.088	0.0004129	-1.03851	0.002183	-0.965212	0.04445	-0.005215	1	-2.075	4.347e-10	-2.055	3.18e-07	-2.06309	9.24e-10	-2.058	2.753e-07	-0.0438406	0.9619
MVLG_00322	15.05	23.7	37.53	24.13	8.27	6.05	4.09	8.4	20.77	12.71	12.54	19.77	37.17	49.12	0.8078	0.01612	-1.322	0.006671	-1.761	9.291e-05	-0.5235	0.1712	1.13	0.02093	-2.07907	0.0001618	-2.555	5.757e-07	-1.38033	0.0008215	0.278191	0.9551	-0.4389	1	0.7854	0.2249	2.367	0.0007975	1.22405	0.03964	2.779	3.028e-05	-1.61765	0.001491
MVLG_00518	0.02	0.02	9.61	1.05	30.25	13.67	0.73	3.35	0.48	0.9	0.85	0	23.79	0	7.886	9.369e-10	9.858	1.185e-28	NA	NA	5.013	5.024e-08	8.957	9.667e-11	1.99485	0.0001618	-1.813	0.06678	-2.9814	1.361e-06	1.09467	0.5971	-3.775	8.649e-08	-4.918	1.009e-24	-0.8986	0.09684	-1.11912	0.1527	2.819	0.004083	-4.02901	5.792e-12
MVLG_01637	47.51	36.49	3598.74	3777.72	1429.85	1995.51	525.54	1146.23	66.03	91.05	280.61	2095.01	2635.48	3599.85	6.673	3.715e-100	5.524	2.997e-66	4.445	3.717e-44	1.68	1.207e-06	6.135	3.032e-40	-1.11136	0.0001675	-2.224	2.315e-14	-5.04948	3.987e-49	-0.576866	0.3814	-1.09	0.01863	-3.858	9.106e-30	0.5584	0.4313	-2.76287	2.564e-16	1.642	0.0002759	-4.45214	2.219e-28
MVLG_04793	2	2.6	1323.22	1601.98	460.02	871.46	147.43	541.09	40.94	32.31	77	223.21	856.84	1013.76	9.547	3.81e-145	8.381	1.375e-104	7.368	1.737e-81	4.435	4.803e-28	8.506	1.455e-55	-1.12751	0.0001752	-2.177	2.848e-13	-5.16587	6.904e-50	-1.0825	0.01111	-1.023	0.04584	-3.959	3.808e-30	0.06277	1	-2.93403	1.621e-17	1.072	0.04204	-4.05642	1.024e-23
MVLG_00096	188.52	183.91	23.11	9.09	55.7	41.55	83.49	60.35	232.36	197.87	278.15	54.83	82.12	36.1	-3.325	3.377e-26	-1.776	7.641e-09	-1.251	3.384e-05	0.2756	0.4746	-1.505	0.0001003	1.57863	0.0001921	2.075	3.367e-08	3.55156	2.162e-18	1.77512	0.001964	0.5119	0.8375	2.038	1.787e-07	0.2106	0.9304	1.54146	5.973e-05	-0.298	0.6956	1.79956	1.793e-05
MVLG_04746	11.3	7.15	5.05	3.8	52.2	9.73	43.17	42.58	14.33	18.34	17.67	15.52	10.76	17.34	-0.9049	0.1966	1.809	4.165e-05	2.27	9.14e-11	0.8195	0.03223	0.7044	0.2919	2.70008	0.0002007	3.147	2.362e-08	1.662	0.01785	1.52436	0.2405	0.4547	0.9719	-1.006	0.05137	-1.142	0.293	-1.45185	0.0003431	-1.602	0.02887	0.108424	0.9961
MVLG_01448	106.53	139.91	55.13	50.39	242.75	143.11	259.6	110.5	311.95	574.18	283.53	521.13	50.24	54.57	-1.066	0.007097	0.7313	0.0416	0.7388	0.03309	1.764	4.43e-07	-0.2123	0.8999	1.81882	0.0002019	1.802	7.586e-05	2.7672	1.346e-10	0.785653	0.3048	-0.01062	1	1.01	0.02036	-0.9725	0.628	1.04808	0.009457	-0.9305	0.5989	1.92096	0.006431
MVLG_00619	230.75	296.04	39.69	33.65	137.02	67.47	211.28	130.29	239.94	244.02	239.88	181.52	73.4	27.48	-2.713	7.641e-20	-1.311	1.216e-05	-0.5822	0.05628	-0.2446	0.509	-1.825	5.614e-05	1.43025	0.00021	2.13	6.559e-10	2.41433	3.699e-10	0.834709	0.2204	0.7169	0.4539	1.051	0.009016	-0.5553	0.7073	0.352071	0.4651	-1.262	0.049	1.55924	0.002661
MVLG_04443	0.74	0.74	0	0.46	9.86	3.59	11.96	10.27	6.72	11.1	8.28	0	3.28	0.73	-1.519	0.3364	3.24	8.015e-08	3.948	9.215e-22	3.451	1.022e-17	1.624	0.2497	4.47087	0.0002224	5.252	5.518e-09	4.88492	1.882e-08	NA	NA	0.6942	0.8487	0.1883	0.8457	-1.641	0.06232	-0.496516	0.3291	-2.346	0.0005138	1.83401	0.001478
MVLG_01272	15.31	19.1	118.78	90.56	27.35	43.86	15.55	33.12	57.6	88.6	40.93	16.82	67.22	39.46	2.741	1.018e-19	1.142	0.00564	0.4215	0.2626	1.784	4.961e-07	1.683	0.0007255	-1.55814	0.0002263	-2.315	1.413e-08	-1.01575	0.006669	-1.09515	0.03612	-0.7217	0.859	0.6165	0.2482	0.4682	0.8233	1.33034	0.005924	1.152	0.1952	0.130242	0.7776
MVLG_02525	33.29	21.15	178.98	179.5	59.42	88.03	26.3	56.4	56.06	22.72	39.43	24.25	94.07	110.13	2.869	1.157e-24	1.544	1.776e-06	0.5874	0.07634	0.3861	0.301	1.833	3.162e-05	-1.28724	0.0002294	-2.28	4.422e-11	-2.52924	1.08e-13	-1.07147	0.01758	-0.959	0.252	-1.169	0.004028	0.2238	0.9714	-0.212367	0.6929	1.151	0.0895	-1.41083	0.003662
MVLG_04552	73.22	65.74	7.67	1.7	24.85	21.86	52.36	18.4	104.13	119.96	103.04	31	19.29	14.18	-3.752	9.625e-21	-1.492	2.461e-05	-0.8608	0.004965	0.5358	0.1435	-1.825	0.0002275	2.26795	0.0002887	2.879	2.63e-08	4.23199	1.373e-18	1.85479	0.02631	0.608	0.8734	2.009	2.326e-06	-0.3885	0.8826	1.42895	0.0002421	-0.9685	0.2574	2.36479	4.773e-06
MVLG_03029	95.37	93.12	6.54	3.89	31.1	13.41	31.93	26.7	111.91	60.26	79.01	55.33	21.64	20.34	-4.04	3.63e-28	-2.021	1.059e-09	-1.638	2.04e-07	-0.3285	0.3737	-1.841	0.00012	2.03379	0.0002927	2.393	6.141e-07	3.66476	1.088e-15	2.1305	0.001482	0.3731	0.9799	1.684	5.79e-05	0.1331	0.8856	1.3286	0.00104	-0.2326	0.9763	1.50402	0.007105
MVLG_02763	0.87	0.95	117.94	89.04	47.67	41.24	27.58	38.31	8.88	14.52	14.64	190.78	138.81	181.14	6.952	2.821e-88	5.674	4.999e-51	5.182	3.016e-43	3.689	3.234e-20	7.57	9.471e-47	-1.24039	0.0003088	-1.765	9.454e-08	-3.32079	8.312e-23	0.58278	0.4506	-0.4988	0.8734	-2.007	4.988e-08	1.846	0.0001502	-1.50385	5.744e-05	2.333	7.402e-07	-3.88401	1.96e-21
MVLG_06756	49.94	54.31	3.94	1.32	29.76	16.86	34.68	30.43	40.02	30.13	29.61	48.43	12.28	6	-4.164	2.57e-15	-1.09	0.006905	-0.6225	0.0839	-0.7624	0.03015	-1.971	0.002704	3.02687	0.0003209	3.49	1.464e-07	3.34438	2.203e-07	NA	NA	0.4535	0.9789	0.3133	0.6369	-0.9226	0.6865	-0.126491	0.8623	-1.375	0.2236	1.20856	0.2342
MVLG_00770	51.82	58.51	13.52	9.69	15.89	57.74	33.56	108.56	73.35	62.09	52.88	36.39	27.36	20.95	-2.117	9.724e-10	-0.4745	0.1695	0.3608	0.2495	0.04375	0.9227	-1.012	0.03885	1.67259	0.0003263	2.472	2.838e-10	2.10853	7.585e-07	1.05256	0.2233	0.826	0.3396	0.4977	0.3074	-0.5999	0.5502	-0.332522	0.4747	-1.45	0.01207	1.0659	0.06171
MVLG_03400	45.42	40.98	40.48	42.24	140.16	63.36	237.78	118.74	153.28	259.94	210.14	60.99	78.55	56.09	0.07459	0.8311	1.292	1.294e-05	2.081	2.495e-12	2.14	8.851e-10	0.6945	0.1256	1.24518	0.0003441	2.006	3.623e-10	2.00455	6.053e-08	0.578435	0.5693	0.7787	0.2862	0.8286	0.04095	-0.6523	0.3488	0.0665246	0.9154	-1.426	0.001935	1.46064	0.000604
MVLG_01264	22.69	17.57	43.89	28.29	114.92	53.59	136.84	87.63	23.15	37.19	44.89	34.09	44.24	89.62	0.9773	0.0004791	2.122	2.672e-13	2.512	5.7e-17	0.6673	0.06489	1.631	7.226e-05	1.17673	0.0003561	1.54	1.052e-06	-0.365771	0.3706	0.617157	0.4826	0.3816	0.9282	-1.473	2.735e-05	-0.5477	0.4016	-1.84016	8.191e-08	-0.9259	0.0575	-0.948515	0.04373
MVLG_04456	0.93	0.59	272.69	355.35	102.65	160.95	33.23	104.85	25.37	22.45	31.99	172.99	251.85	172.42	8.813	9.678e-88	7.522	2.365e-49	6.433	8.89e-39	5.063	1.601e-27	8.193	5.564e-33	-1.25485	0.0004164	-2.384	1.255e-11	-3.8135	7.746e-28	-0.653042	0.3343	-1.088	0.1597	-2.483	6.238e-11	0.615	0.4885	-1.41024	0.0004855	1.659	0.002976	-3.12624	1.596e-13
MVLG_05261	2.26	1.77	458.25	381.02	177.18	205.78	71.12	128.72	88	109.31	82.26	238.41	656.65	776.14	7.839	1.74e-107	6.659	8.238e-72	5.65	6.66e-51	5.434	1.045e-37	8.289	2.249e-53	-1.1429	0.0004285	-2.185	4.538e-12	-2.46369	4.941e-14	0.41194	0.7307	-1.015	0.08768	-1.247	0.0006513	1.569	0.001538	-0.228768	0.6369	2.568	3.309e-08	-2.83767	4.544e-13
MVLG_05303	27729.2	25503.3	3914.38	2469.65	7153.77	6538.73	6889.97	11265.8	8923.99	4776.33	5727.98	9768.46	2456.03	4392.64	-2.872	7.849e-27	-1.82	8.422e-11	-1.414	1.236e-06	-1.774	2.296e-08	-2.141	3.398e-09	1.09072	0.0004285	1.467	1.164e-06	1.05687	0.003679	0.698785	0.2727	0.3963	0.8954	0.03537	0.9638	-0.3623	0.6987	-0.345945	0.4461	-0.7635	0.1657	0.372788	0.5442
MVLG_00802	12.79	11.48	431.1	423.63	1325.1	661.58	1227.8	1384.84	256.63	391.55	312.6	580.09	323.79	257.76	5.299	3.179e-59	6.432	1.631e-72	6.833	2.442e-75	4.781	1.47e-32	5.007	2.176e-25	1.16289	0.0004373	1.536	1.089e-06	-0.577339	0.1337	-0.332949	0.8655	0.3939	0.908	-1.671	1.428e-06	-1.471	0.004327	-2.05124	1.868e-09	-1.863	5.753e-05	-0.229662	0.7135
MVLG_03437	314.5	601.5	30.97	6.86	167.06	104.74	147.77	251.76	363.84	137.96	276.63	343.53	67.81	98.99	-4.404	1.864e-22	-1.665	5.986e-06	-1.162	0.0008591	-0.6765	0.05591	-1.847	0.0009435	2.7188	0.0004512	3.205	8.094e-08	3.68109	2.739e-11	2.44607	0.003703	0.4968	0.9296	0.9829	0.04579	-0.2328	1	0.486721	0.3665	-0.7463	0.5513	1.16878	0.1281
MVLG_00396	0.31	0.86	282.28	255.39	118.68	124.23	109.37	121.03	69.64	69.08	117.27	247.03	295.87	447.99	8.951	2.903e-103	7.752	2.477e-66	7.63	2.564e-70	7.053	2.634e-50	9.238	4.684e-48	-1.16281	0.0004561	-1.319	4.817e-05	-1.95284	3.047e-09	0.253805	0.8912	-0.1341	1	-0.7154	0.0763	1.433	0.00541	-0.572542	0.1769	1.563	0.001229	-2.17821	3.93e-08
MVLG_00272	662.21	372.13	4.93	0.44	12.39	12.62	6.75	6.08	62.32	40.86	57.14	102.29	15.32	3.5	-7.448	9.651e-87	-5.279	2.216e-53	-6.28	1.822e-64	-3.422	2.548e-26	-4.553	2.326e-22	2.18195	0.0004612	1.163	0.1023	3.97823	3.58e-17	2.8086	3.661e-06	-1.009	0.4539	1.842	1.731e-05	0.7035	0.2407	2.86951	1.917e-11	1.727	0.001772	1.04455	0.2616
MVLG_02498	0	0	2777.26	3574.82	1458.56	1638.85	655.42	1351.93	145.82	130.68	252.48	3016.16	2595.67	2679.01	18.67	1.719e-179	17.57	7.911e-136	16.95	7.054e-123	14.56	3.724e-72	18.07	1.409e-75	-1.05251	0.0004908	-1.746	2.899e-09	-4.47515	2.012e-40	-0.316245	0.7765	-0.6711	0.4174	-3.347	2.865e-23	0.7588	0.212	-2.66661	2.993e-15	1.423	0.002105	-4.13369	3.135e-25
MVLG_05851	13.15	20.06	104.8	38.69	26.78	14.98	13.64	3.52	9.31	6.08	2.22	20.67	20.97	37.61	2.247	1.466e-11	0.3965	0.4927	-0.6785	0.104	-1.735	1.104e-05	0.8803	0.1537	-1.80253	0.0004908	-2.899	2.106e-10	-4.03485	2.295e-20	-1.40332	0.044	-1.083	0.5328	-2.148	0.001546	0.42	0.8852	-1.02192	0.2546	1.537	0.06779	-2.57891	6.525e-05
MVLG_05899	181.25	190.22	344.33	484.48	736.48	1040.14	832.73	943.49	423.43	490.73	438.52	640.7	244.61	255.77	1.301	1.091e-06	2.363	1.326e-16	2.312	6.065e-15	1.218	0.000435	0.9421	0.01862	1.09656	0.0005327	1.011	0.001937	-0.142128	0.7503	-0.402807	0.7978	-0.06395	1	-1.163	0.001098	-1.462	0.003696	-1.08989	0.002788	-1.402	0.004339	0.266586	0.7746
MVLG_06338	0.04	0.07	731.71	621.1	310.8	334.03	72.36	163.64	7.83	7.21	28.9	409.15	370.06	530.83	13.58	1.017e-131	12.46	1.894e-93	10.95	5.496e-70	7.895	3.674e-34	12.85	2.382e-51	-1.08302	0.000544	-2.631	1.381e-17	-5.77413	1.236e-57	-0.71436	0.2371	-1.52	0.0005119	-4.615	2.055e-37	0.3894	0.6803	-3.09629	4.198e-18	1.892	5.477e-05	-5.04803	3.146e-32
MVLG_02823	0.23	0.09	1726.23	1733.65	722.65	945.37	337.21	651.21	58.44	67.57	109.86	798.16	983.81	1193.74	13.43	3.894e-152	12.34	7.546e-112	11.54	6.505e-99	8.776	1.96e-55	12.59	8.52e-59	-1.05828	0.0005561	-1.895	1.677e-10	-4.73268	1.36e-43	-0.863727	0.08673	-0.813	0.2039	-3.598	8.91e-26	0.2155	0.8809	-2.77852	4.671e-16	1.02	0.05107	-3.84311	6.344e-22
MVLG_00258	10.18	10.91	12.38	0	0	0	0	0	20.98	22.76	24.36	7.47	8.63	9.63	-0.643	0.06347	-10.88	2.198e-11	-10.92	2.743e-16	0.9774	0.006617	-0.1489	0.8852	-6.1678	0.0005564	-6.76	3.668e-05	1.56991	0.0005477	0.446352	0.9358	NA	NA	10.84	6.012e-14	6.298	0.004678	10.9138	2.689e-18	6.886	0.0006558	1.13456	0.07412
MVLG_03714	27.21	32.66	24	1.27	0	0	0.58	0	3.86	4.02	5.11	0	34.43	42.39	-1.107	0.004832	-11.34	2.232e-14	-6.158	3.241e-18	-2.843	1.526e-15	0.3321	0.9658	-6.16827	0.0005564	-4.703	2.186e-05	-1.78891	0.004282	1.38588	0.2727	NA	NA	7.486	0.01211	7.23	5.716e-05	3.28781	0.003176	6.009	4.771e-06	-3.14987	1.502e-08
MVLG_05664	0.19	0.67	80.89	68.65	17.35	27.05	5.16	18.82	0.7	0.93	3.32	160.6	152.49	170.95	7.539	7.171e-41	5.741	1.944e-11	4.525	8.831e-10	1.961	0.002432	8.625	1.23e-30	-1.75275	0.0005615	-3	3.461e-09	-5.63205	6.631e-34	1.05621	0.09965	-1.205	0.733	-3.794	9.036e-09	2.822	1.53e-06	-2.60053	0.0001379	3.976	8.521e-11	-6.64522	8.84e-35
MVLG_02597	27.91	27.05	290.08	341.04	125.52	166.56	47.7	89.1	43.81	39.11	44.59	198.35	214.26	204.74	3.659	8.316e-39	2.502	7.686e-17	1.328	1.994e-05	0.504	0.1768	2.992	5.047e-13	-1.12133	0.0005619	-2.332	2.024e-13	-3.21092	4.149e-22	-0.70741	0.2567	-1.181	0.02519	-2.015	1.091e-08	0.4333	0.6453	-0.831813	0.0384	1.596	0.00136	-2.47404	6.777e-10
MVLG_04422	60.62	50.89	5.29	0.88	23.36	15.82	38.98	33.28	34.28	41.47	39.04	21.43	6.85	8.16	-4.035	1.015e-19	-1.431	0.0001084	-0.5721	0.08924	-0.6438	0.06194	-2.639	6.109e-06	2.59294	0.000571	3.435	7.376e-10	3.33265	8.908e-10	NA	NA	0.8451	0.5484	0.769	0.1404	-1.247	0.3895	-0.0645858	0.9164	-2.091	0.006241	1.98761	0.004606
MVLG_01931	178.3	93.33	83.23	57.29	33.44	23.95	5.5	14.51	5.11	7.3	8.02	109.17	28.93	46.95	-0.8014	0.004147	-2.157	1.096e-11	-3.87	1.396e-26	-4.381	1.691e-38	-1.4	0.002547	-1.31691	0.0005777	-3.061	5.483e-15	-3.63578	8.71e-25	-0.641442	0.6399	-1.703	0.01291	-2.244	3.148e-08	0.7176	0.2924	-0.554913	0.2503	2.377	3.028e-05	-3.01893	5.63e-12
MVLG_03784	51.39	52.58	69.26	109.8	155.56	240.43	205.74	181.76	76.73	74.88	120.1	88.47	37.4	53.08	0.9254	0.001073	2.038	2.542e-12	1.955	5.9e-11	0.688	0.05567	0.03065	0.8907	1.14668	0.0006194	1.027	0.002709	-0.295055	0.49	-0.942601	0.2306	-0.09916	1	-1.366	0.0001269	-2.056	4.497e-05	-1.25772	0.0004889	-1.958	8.14e-05	0.648736	0.3366
MVLG_06833	54.74	49.54	196.04	155.6	71.35	65.66	63.38	58.28	72.75	135.95	114.47	73.68	161.44	120.09	1.905	4.297e-11	0.4872	0.2124	0.2897	0.4522	1.038	0.003536	1.512	0.0008391	-1.3793	0.0006508	-1.609	1.322e-05	-0.926661	0.01218	-0.43127	0.6273	-0.2095	1	0.5282	0.3156	0.9576	0.2713	0.749496	0.1137	1.167	0.06821	-0.454065	0.5427
MVLG_04490	10.86	10.56	1.87	0	14.81	3.99	28.42	18.25	12.78	19.46	18.14	7.52	3.8	0.97	-3.383	1.741e-08	-0.1311	0.8068	1.193	0.0004654	0.5482	0.1563	-1.76	0.02212	3.17652	0.000689	4.505	2.423e-12	3.86588	4.726e-09	NA	NA	1.306	0.1005	0.6612	0.2657	-1.651	0.2262	-0.631396	0.1666	-2.957	0.0002056	2.3096	0.002864
MVLG_01206	30.71	31.71	45.16	22.87	114.31	87.18	272.92	228.09	141.79	257.99	199.78	0	48.04	60.09	0.2714	0.541	1.772	1.701e-07	3.063	2.234e-22	2.64	1.865e-13	0.7982	0.3278	1.52918	0.0007416	2.791	3.164e-14	2.31004	1.86e-08	0.482948	0.9679	1.278	0.01414	0.8465	0.05443	-1.034	0.04733	-0.42028	0.3513	-2.312	6.903e-08	1.86363	3.011e-06
MVLG_01676	0.88	0.87	25.7	6.13	47.29	58.15	16.18	45.1	90.38	156.5	69.08	15.02	51.16	14.95	4.31	2.085e-12	5.987	3.928e-32	5.028	1.621e-28	6.82	7.694e-49	5.347	4.053e-14	1.70503	0.0007452	0.7133	0.205	2.44886	1.306e-08	0.996203	0.4754	-0.9564	0.4777	0.8034	0.0815	-0.7021	0.342	1.74535	7.439e-05	0.2044	1	1.49538	0.0009817
MVLG_05410	50.68	34	69.74	68.69	154.51	177.49	184.69	144.25	181.73	175.59	180.59	178.1	99.59	78.17	0.8616	0.005746	2.073	1.033e-11	2.021	4.093e-11	2.004	1.083e-08	1.398	0.001016	1.24585	0.0008074	1.162	0.001542	1.08783	0.005762	0.491747	0.6216	-0.06649	1	-0.08748	0.8719	-0.7245	0.3944	-0.0071488	0.9935	-0.6549	0.4	0.600666	0.3678
MVLG_07339	93.46	101.81	283.37	138.98	14.81	45.45	20.27	22.16	30.8	17.47	38.25	430.41	281.11	426.77	1.301	0.0012	-1.511	0.0473	-2.063	0.0009018	-1.469	0.0001643	2.376	4.434e-07	-2.72161	0.0008207	-3.306	6.814e-07	-2.81944	1.318e-08	1.02837	0.245	NA	NA	0.0257	1	3.751	3.609e-06	0.601389	0.619	4.32	1.185e-09	-3.8153	2.28e-14
MVLG_00394	2740.59	2925.11	46.28	41.18	98.72	146.55	77.27	143.26	582.13	290.52	572.7	748.29	189.48	207.65	-5.871	1.598e-72	-4.425	1.835e-43	-4.669	3.196e-44	-2.619	1.507e-16	-3.106	3.569e-15	1.47662	0.000843	1.198	0.004569	3.20515	1.985e-15	2.71034	2.873e-08	-0.2521	1	1.794	5.68e-06	1.278	0.018	2.04716	2.219e-07	1.514	0.002773	0.463406	0.5593
MVLG_06994	35.17	204.93	346.98	359.13	696.15	908.45	1352.09	1314.23	255.47	473.1	642.3	65.09	435.22	830.33	1.672	2.183e-08	2.828	2.99e-20	3.534	2.511e-29	2.042	7.028e-09	2.446	1.876e-08	1.18837	0.0008806	1.859	9.17e-09	0.310925	0.513	0.726087	0.4839	0.6901	0.4619	-0.8028	0.03935	-0.4535	0.4455	-1.48546	2.339e-05	-1.148	0.006608	-0.369114	0.7145
MVLG_05763	294.29	322.78	663.49	1040.66	1479.85	2011.06	1431.35	2103.21	298.29	269.99	487.72	643.4	389.75	476.66	1.606	7.573e-10	2.601	7.163e-20	2.574	4.592e-18	0.118	0.7851	0.7498	0.06831	1.02849	0.0009074	0.9661	0.002521	-1.54523	2.731e-06	-0.898369	0.1029	-0.03977	1	-2.497	7.28e-14	-1.9	8.01e-06	-2.44855	4.022e-13	-1.866	1.069e-05	-0.627548	0.2034
MVLG_02312	21.29	16.28	0	1.72	12.61	8.87	22.88	8.17	22.96	48.45	33.36	0	3.74	4.01	-4.289	2.287e-11	-0.7252	0.1336	-0.1105	0.6738	0.8232	0.02412	-2.252	5.863e-05	3.43449	0.0009144	4.074	1.402e-06	5.03699	1.747e-13	NA	NA	0.5902	0.9762	1.523	0.003546	-1.55	0.1249	0.960835	0.02882	-2.119	0.005312	3.07634	8.816e-08
MVLG_00084	160.51	115.17	168.11	245.07	457.47	501.03	475.73	365.14	464.6	321.18	296.61	370.19	319.3	224.16	0.7489	0.01406	1.92	1.614e-10	1.708	2.009e-08	1.422	4.071e-05	1.292	0.002422	1.2031	0.0009207	0.9595	0.01065	0.620375	0.1354	0.500066	0.6511	-0.2255	1	-0.5127	0.2314	-0.6828	0.3645	-0.270935	0.594	-0.4558	0.541	0.14333	0.8719
MVLG_01580	192.38	239.11	48.9	61.26	84.17	159.36	159.82	243.47	189.68	189.08	236.73	119.55	113.82	61.65	-1.839	2.532e-11	-0.7285	0.01456	-0.06431	0.8692	-0.2138	0.5658	-1.13	0.004596	1.14606	0.0009748	1.774	2.545e-08	1.56912	2.148e-05	0.664087	0.3951	0.6502	0.5143	0.4982	0.2582	-0.4571	0.6034	-0.145355	0.7813	-1.115	0.02858	0.924736	0.05337
MVLG_02381	106.09	132.47	344.75	362	158.94	167.85	66.84	114.63	173.62	120.79	172.1	326.3	265.59	186.87	1.704	2.042e-10	0.5391	0.09139	-0.3841	0.2941	0.2886	0.4533	1.154	0.004973	-1.1297	0.000981	-2.088	2.398e-10	-1.46611	1.449e-05	-0.591637	0.4686	-0.929	0.2025	-0.2635	0.5896	0.5609	0.4834	0.668931	0.1499	1.472	0.004367	-0.856718	0.06923
MVLG_07269	34.44	34.96	83.13	66.22	16.59	11.76	9.64	26.04	11.04	5.81	13.67	0	107.78	200.64	1.266	0.0007586	-1.194	0.08067	-1.12	0.05257	-1.803	2.429e-06	2.194	1.184e-05	-2.39222	0.000981	-2.367	7.667e-05	-3.12163	3.107e-11	0.882767	0.5476	0.06886	1	-0.6214	0.6603	3.276	2.336e-05	-0.702636	0.3943	3.185	9.211e-06	-3.95191	2.945e-14
MVLG_06670	40.18	36.59	56.3	47.4	22.82	23.75	7.65	16.23	9.59	8.58	13.13	25.09	32.73	45.18	0.5669	0.04391	-0.6415	0.04742	-1.72	2.469e-07	-2.029	2.627e-10	-0.01672	0.9331	-1.17141	0.001091	-2.285	4.624e-11	-2.64887	3.878e-15	-0.622517	0.3732	-1.079	0.1404	-1.403	0.0003009	0.564	0.54	-0.329861	0.4954	1.613	0.003275	-1.99651	2.674e-06
MVLG_04650	40.93	45.03	18.55	17.23	66.77	51.36	115.75	82.85	92.31	187.3	148.45	17.62	35.06	19.5	-1.123	0.004835	0.5363	0.1492	1.271	6.284e-05	1.674	1.649e-06	-0.5071	0.3053	1.68245	0.001095	2.389	1.011e-08	2.73504	3.039e-10	0.566916	0.8338	0.7201	0.5727	1.116	0.01058	-1.101	0.137	0.409748	0.4057	-1.818	0.0008834	2.19978	4.27e-06
MVLG_02450	27.75	18.42	10.2	12.36	35.6	24.09	52.62	40.11	65.94	87.05	60.67	23.53	24.12	11.68	-0.8883	0.007421	0.4463	0.1881	1.052	0.0006319	1.487	1.739e-05	-0.2085	0.7233	1.36308	0.001101	1.94	1.088e-07	2.31602	3.857e-09	0.635194	0.5886	0.5949	0.6915	1.021	0.01346	-0.7091	0.4063	0.441369	0.3496	-1.301	0.01917	1.7061	0.0002615
MVLG_02202	954.79	1037.92	1290.79	1478.32	614.41	762.3	694.6	683.68	561.92	404.33	520.11	964.66	1283.17	1179.81	0.6147	0.02113	-0.4383	0.1437	-0.4837	0.1156	-1.103	0.0007165	0.3132	0.5043	-1.01745	0.001175	-1.098	0.0004583	-1.76969	5.101e-08	-0.341694	0.7387	-0.05894	1	-0.6785	0.08043	0.6959	0.2965	-0.607839	0.1362	0.7506	0.1928	-1.40124	0.0005886
MVLG_05604	21.36	20.52	62.85	50.95	20.52	5.59	11.84	13.84	76.22	119.19	65.56	54.63	44.76	28.97	1.594	1.652e-05	-0.6095	0.3653	-0.6839	0.2031	2.05	1.087e-08	1.093	0.04882	-2.14488	0.001244	-2.259	5.445e-05	0.394635	0.4452	-0.541372	0.7585	-0.0821	1	2.636	1.78e-06	1.617	0.109	2.72658	5.047e-08	1.701	0.03479	0.964883	0.1366
MVLG_00321	8.71	9.6	332.12	303.7	137.31	166.54	49.34	81	26.57	58.35	51.95	229.16	405.34	474.05	5.252	6.816e-66	4.14	2.354e-37	2.842	4.905e-18	2.241	4.919e-10	5.485	2.841e-32	-1.0757	0.001275	-2.408	5.376e-14	-3.07265	1.138e-20	0.193512	0.9503	-1.305	0.009863	-1.922	4.478e-08	1.284	0.01652	-0.616715	0.142	2.572	4.685e-08	-3.23167	3.623e-16
MVLG_04952	26.78	37.69	47.06	57.37	12.67	12.12	5.14	3.99	0	1.56	1.92	47.06	65.93	53.56	0.8323	0.02136	-1.296	0.02089	-2.713	2.66e-07	-4.424	3.084e-28	1.033	0.04662	-2.07397	0.001371	-3.5	1.229e-09	-5.3073	5.49e-26	0.153767	1	NA	NA	-3.138	0.0001757	2.235	0.007827	-1.70156	0.05656	3.641	1.154e-06	-5.43047	3.34e-18
MVLG_05010	333.74	358.11	166.73	166.63	59.95	81.4	67.52	78.31	94.79	103.6	82.9	191.17	126.35	170.5	-0.9114	0.001113	-2.195	6.46e-12	-2.21	3.31e-12	-1.955	9.296e-10	-1.032	0.01309	-1.24595	0.00153	-1.297	0.0003796	-1.09982	0.002353	-0.163815	0.9679	-0.02736	1	0.2196	0.7116	1.103	0.08833	0.255097	0.6695	1.125	0.05393	-0.915071	0.05892
MVLG_02862	63.85	68.13	55.5	84.14	114.92	178.27	128.65	136.16	56.38	34.23	45.22	59.62	42.51	30.96	0.2164	0.4779	1.245	1.558e-05	1.038	0.0005102	-0.7106	0.0384	-0.6383	0.1838	1.0624	0.001624	0.8192	0.01967	-0.979627	0.006901	-0.900304	0.1971	-0.2214	1	-1.968	1.278e-08	-1.935	5.998e-05	-1.73568	6.919e-07	-1.718	0.0004201	-0.0668379	0.9205
MVLG_06808	2.31	1.61	39.17	43.03	120.25	67.25	105.87	104.23	30.02	61.98	58.53	62.66	103.55	68.75	4.542	4.375e-38	5.705	8.531e-56	5.807	2.564e-56	4.612	3.973e-30	5.524	2.534e-28	1.19255	0.001655	1.265	0.0003823	0.0060049	0.9953	0.941522	0.1891	0.0935	1	-1.116	0.00309	-0.238	0.8208	-1.19824	0.001093	-0.333	0.631	-0.901488	0.07068
MVLG_01954	602.35	458.45	3.58	1.81	16.84	32.25	30.16	20.86	73.69	139.74	100.03	44.63	67.37	32.25	-7.454	2.571e-58	-4.32	4.694e-32	-4.262	4.456e-34	-2.36	9.349e-14	-3.212	1.024e-14	3.06203	0.001674	3.126	0.0002523	5.02516	4.185e-16	4.07403	2.672e-06	0.03974	1	1.933	6.796e-05	1.032	0.3623	1.9113	9.964e-06	1.009	0.2236	0.866199	0.1125
MVLG_04999	26.03	26.14	2.08	1.04	28.97	1.33	45.44	28.37	91.3	173.13	86.29	0	18.72	20.73	-3.921	7.511e-11	-0.7385	0.06325	0.5811	0.1088	2.075	3.767e-09	-0.4114	0.1868	3.10668	0.001674	4.431	4.548e-11	5.92686	1.689e-23	3.34324	0.008293	1.304	0.1021	2.794	3.525e-10	0.2679	1	1.50626	0.0001778	-1.023	0.05904	2.50625	4.911e-09
MVLG_01464	26.08	24.7	66.77	62.47	85.11	221.23	95.81	219.06	28.75	29.3	29.44	62.23	25.24	22.64	1.494	6.586e-06	2.716	3.723e-17	2.655	7.302e-17	0.1468	0.7508	0.2432	0.5963	1.258	0.001702	1.16	0.002213	-1.40406	0.0004441	-1.29089	0.1941	-0.07112	1	-2.59	3.181e-12	-2.521	4.497e-05	-2.52204	3.456e-12	-2.471	3.7e-05	-0.100086	0.8443
MVLG_00784	0	0	809.7	465.71	1464.44	1162.86	1249.67	1253.27	68.17	315.97	461.49	125.11	738.73	916.69	14.93	4.871e-99	15.89	1.275e-104	15.84	2.053e-104	13.94	2.265e-65	14.7	2.915e-44	1.0124	0.001789	0.8923	0.007311	-1.3592	5.137e-05	0.0647048	1	-0.1006	1	-2.297	7.265e-12	-0.9393	0.04579	-2.18828	9.548e-11	-0.8412	0.06538	-1.38038	0.001447
MVLG_03975	131.85	138.36	690.01	1168.34	2538.81	1346.79	2660.31	1884.43	493.7	634.47	631.08	501.01	601.82	469.07	2.935	5.24e-26	3.93	7.69e-38	4.171	5.515e-39	2.23	2.481e-10	2.243	8.968e-08	1.02147	0.00183	1.233	0.0001004	-0.766189	0.03531	-0.734488	0.2392	0.2312	1	-1.718	5.322e-07	-1.745	6.412e-05	-1.93381	1.502e-08	-1.974	2.823e-06	0.0056957	0.9857
MVLG_00694	66.81	73.27	71.16	104.45	167.44	209.88	196.72	190.39	130.91	172.82	143.17	140.62	120.54	71.38	0.4627	0.12	1.519	1.996e-07	1.506	4.283e-07	0.9758	0.005325	0.6595	0.1328	1.0885	0.001869	1.041	0.002535	0.452257	0.2867	0.151805	0.9649	-0.02669	1	-0.5626	0.169	-0.9127	0.1512	-0.525529	0.2166	-0.8887	0.1236	0.322787	0.6601
MVLG_03800	118.93	75.02	137.41	135.25	362.96	230.04	522.87	496.16	236.98	473.8	359.24	210.84	254.33	223.01	0.6449	0.02518	1.693	5.682e-09	2.452	1.999e-16	1.815	1.635e-07	1.379	0.0008002	1.08032	0.001869	1.81	7.529e-09	1.10831	0.003179	0.696668	0.3725	0.7498	0.308	0.09909	0.8709	-0.3681	0.678	-0.638292	0.1138	-1.118	0.01888	0.448347	0.414
MVLG_05228	95.19	66.45	320.4	308.68	115.33	57.7	47.49	88.52	156.03	62.3	83.23	383.77	158.14	290.81	2.136	1.617e-09	0.2254	0.765	-0.2304	0.7815	0.5472	0.1388	2.017	4.593e-05	-1.86081	0.001869	-2.351	6.087e-06	-1.63641	0.0001456	-0.162539	0.9997	-0.4552	1	0.3129	0.6603	1.72	0.04426	0.774508	0.2404	2.157	0.002909	-1.44183	0.009497
MVLG_01548	11.87	9.25	132.97	150.51	60.89	79.73	35.29	54.57	54.64	33.07	55.86	63.87	120.89	109.88	3.886	6.756e-43	2.827	4.72e-21	2.117	4.78e-12	2.017	8.531e-09	3.346	1.47e-15	-1.02269	0.001975	-1.768	1.371e-08	-1.91962	4.505e-09	-0.578901	0.3733	-0.7199	0.4237	-0.823	0.03374	0.4586	0.628	-0.0958491	0.8599	1.167	0.02901	-1.30897	0.002236
MVLG_03517	163.78	139.13	245.41	219.95	113.76	114.02	64.25	76.12	58.62	73.9	63.62	107.76	232.25	232.18	0.7595	0.004804	-0.3257	0.3123	-1.075	0.0005182	-1.327	3.968e-05	0.5087	0.2865	-1.049	0.001999	-1.831	7.588e-09	-2.14355	6.661e-11	-0.288421	0.7762	-0.7588	0.3787	-1.021	0.007089	0.7731	0.2787	-0.25336	0.6108	1.524	0.002296	-1.81486	9.28e-06
MVLG_04755	16.53	12.96	22.9	24.5	66.19	49.16	64.94	60.22	11.32	23.56	26.97	29.89	50.71	68.39	0.8263	0.01263	2.044	9.701e-11	2.128	7.702e-12	0.4051	0.3158	1.976	5.221e-06	1.24747	0.002114	1.302	0.000577	-0.483067	0.2588	1.10647	0.1034	0.0739	1	-1.66	6.8e-06	-0.1276	0.909	-1.72404	1.422e-06	-0.2025	0.774	-1.56145	0.0005849
MVLG_05847	2414.02	3033.2	29.4	17.39	52.4	68.36	16.34	40.51	331.89	164.16	262.87	458.54	117.27	56.67	-6.732	2.288e-91	-5.41	2.329e-60	-6.647	8.637e-73	-3.57	2.143e-28	-4.007	4.917e-24	1.35415	0.002192	0.08247	0.8629	3.11799	5.249e-15	2.67192	2.109e-08	-1.237	0.07948	1.829	3.484e-06	1.371	0.009454	3.05746	1.623e-13	2.573	3.861e-07	0.402467	0.6731
MVLG_00290	0.32	0.3	143.3	102.56	21.59	9.8	6.75	24.96	0	2.97	4.04	0	122.32	97.44	8.518	2.016e-14	NA	NA	NA	NA	NA	NA	8.52	6.847e-08	-2.91811	0.002222	-3.285	4.137e-05	-5.22781	2.632e-17	0.0290416	0.9858	NA	NA	NA	NA	2.936	0.01783	NA	NA	3.255	0.003051	-5.20721	8.568e-10
MVLG_06573	116.49	177.44	141.2	119.61	354.67	258.73	645.3	431.3	87.11	193.84	219.74	37.07	729.79	146.68	-0.02672	0.9548	1.14	0.0002488	1.945	1.096e-10	0.2298	0.5849	1.548	0.0004892	1.19758	0.002264	1.972	5.64e-09	0.196217	0.7279	1.53352	0.008222	0.7913	0.3146	-0.9303	0.01733	0.3363	0.9009	-1.70974	1.019e-06	-0.4551	0.3308	-1.28394	0.007349
MVLG_01037	88.71	176.04	26.03	33.21	58.04	81.98	108.9	129.34	77.3	105.96	109.25	36.04	65.18	83.01	-2.04	6.009e-12	-0.8431	0.006633	-0.132	0.7124	-0.5744	0.09584	-0.8896	0.01964	1.22779	0.002329	1.904	3.188e-08	1.40594	0.0003711	1.1016	0.1124	0.697	0.486	0.2499	0.6424	-0.1129	0.9229	-0.439612	0.3207	-0.8159	0.1192	0.340368	0.5304
MVLG_00507	9.28	5.96	424.22	487.74	151.43	305.12	38.98	149.5	43.01	55.78	46.42	369.87	255.36	251.78	6.05	2.482e-82	5.021	4.292e-53	3.646	7.521e-29	2.562	1.31e-12	5.285	1.379e-30	-0.989863	0.002352	-2.403	1.335e-14	-3.54738	1.006e-26	-0.801046	0.1818	-1.38	0.003034	-2.48	4.356e-13	0.2168	0.8675	-1.10503	0.003257	1.57	0.001302	-2.7215	5.414e-12
MVLG_00677	0.19	0.19	450.38	539.1	254.1	219.23	58.23	152.39	15.49	11.76	24.46	437.87	265.7	449.29	11.34	7.751e-91	10.22	4.944e-56	8.942	1.304e-40	6.381	2.371e-23	10.91	2.467e-36	-1.08761	0.002352	-2.404	3.943e-12	-5.04581	1.489e-42	-0.435098	0.6792	-1.278	0.03441	-3.882	1.497e-23	0.6737	0.3737	-2.61362	5.169e-11	1.918	0.0001986	-4.58814	4.284e-25
MVLG_02033	13.08	14.96	36.27	30.08	13.56	14.17	5.92	11.55	13.22	17.06	15.53	36.63	22.48	46.68	1.371	1.928e-06	0.05836	0.8933	-0.7459	0.06106	-0.01689	0.9519	1.367	0.001418	-1.27443	0.002352	-2.114	6.324e-08	-1.44446	5.01e-05	-0.0478953	1	-0.8051	0.6639	-0.09542	0.8709	1.248	0.04958	0.703422	0.1972	2.023	0.0002642	-1.37844	0.002385
MVLG_02521	24.1	20.19	16.46	8.89	47.28	39.04	93.5	58.71	191.23	155.27	158.16	77.81	36.68	21.25	-0.658	0.1669	1.047	0.006167	1.857	7.821e-09	2.829	4.462e-15	0.7563	0.1124	1.72707	0.002352	2.51	1.356e-08	3.43578	8.611e-15	1.35585	0.1059	0.7925	0.5148	1.766	2.54e-05	-0.3432	0.9392	0.99277	0.01521	-1.123	0.14	2.0701	0.0001029
MVLG_05531	161.54	107.42	18.7	12.76	57.48	34.08	68.2	63.05	41.19	59.62	43.78	35.99	22.86	13.63	-2.947	8.201e-19	-1.475	5.191e-06	-0.9812	0.001799	-1.562	1.153e-06	-2.611	3.594e-08	1.49773	0.002352	1.964	2.152e-06	1.3259	0.003621	0.290052	0.9105	0.4845	0.8891	-0.1075	0.8547	-1.185	0.1791	-0.579889	0.1852	-1.669	0.008097	1.05008	0.114
MVLG_02817	221.82	277.38	22.96	46.35	42.54	115.77	67.73	104.27	38.05	40.92	57.03	102.05	23.23	13.04	-2.715	1.144e-20	-1.551	1.947e-07	-1.517	6.615e-07	-2.581	4.881e-16	-3.103	1.464e-10	1.19721	0.00243	1.193	0.001191	0.0735224	0.9141	-0.445433	0.9804	0.01992	1	-1.049	0.006958	-1.592	0.04425	-1.06715	0.004804	-1.618	0.02285	0.47941	0.7962
MVLG_03575	617.34	845.27	31.73	19.57	74.81	64.26	107.93	98.97	290.75	158.19	271.57	284.6	71.86	54.08	-4.701	5.173e-49	-3.321	3.523e-26	-2.78	1.547e-19	-1.725	6.302e-08	-2.834	6.236e-11	1.40828	0.002482	1.919	7.136e-07	2.92964	5.037e-13	1.80685	0.0005959	0.5281	0.8399	1.586	8.116e-05	0.4499	0.5088	1.07167	0.007888	-0.07108	0.9688	1.07312	0.08301
MVLG_00812	112.8	109.9	572.8	952.11	1271.04	1704.42	1310.37	1519.53	206.63	294.68	537.95	469.3	429.93	528.37	2.918	2.507e-27	3.839	1.174e-37	3.718	2.975e-33	1.558	6.639e-06	2.193	4.004e-08	0.955209	0.00254	0.798	0.01579	-1.42121	1.722e-05	-0.765805	0.1887	-0.1348	1	-2.298	5.455e-12	-1.7	5.899e-05	-2.15613	1.665e-10	-1.57	0.0002232	-0.627042	0.2098
MVLG_05435	116.83	117.62	226.69	190.74	108.09	100.83	72.1	88.28	98.27	76.09	130.91	167.28	191.45	221.39	0.9663	0.0002855	-0.08866	0.8091	-0.5168	0.1069	-0.3422	0.3453	0.8183	0.05169	-1.01903	0.002652	-1.479	3.278e-06	-1.35883	5.375e-05	-0.186506	0.9126	-0.4376	0.8904	-0.2666	0.5736	0.8504	0.1873	0.180547	0.7589	1.282	0.01216	-1.14625	0.008139
MVLG_03958	268.05	313.99	10.54	10.68	42.47	45.21	47.19	81.86	141.02	178.39	161.67	43.76	10.3	18.48	-4.635	7.903e-34	-2.642	1.417e-14	-2.178	3.779e-11	-0.9117	0.005997	-4.073	7.091e-14	2.00264	0.002706	2.438	2.899e-06	3.664	2.695e-14	0.499763	0.8257	0.4569	0.9578	1.711	0.0001057	-1.47	0.2507	1.25051	0.003773	-1.951	0.01703	3.15263	3.068e-07
MVLG_04647	258.35	271.59	67.52	26.88	150.25	133.23	116.89	179.94	206.82	86.21	112.97	41.74	69.26	60.21	-2.317	1.955e-11	-0.8013	0.02051	-0.7948	0.01998	-0.9815	0.004094	-1.804	4.842e-05	1.54283	0.002788	1.519	0.0006556	1.29313	0.004589	0.466336	0.8994	-6.883e-05	1	-0.1892	0.7655	-1.061	0.1484	-0.182339	0.7546	-1.078	0.08	0.852861	0.1259
MVLG_04073	28.5	26.2	473.45	550.01	274.98	249.65	78.53	174.17	32.67	31.86	50.32	571.13	513.07	419.07	4.368	1.514e-51	3.345	4.674e-28	2.231	6.113e-13	0.3989	0.3081	4.256	6.37e-23	-0.989033	0.002859	-2.136	8.71e-12	-4.02494	1.358e-32	-0.150343	0.9551	-1.118	0.03458	-2.962	1.587e-17	0.8598	0.1576	-1.84172	2.73e-07	1.961	2.776e-05	-3.85212	2.087e-21
MVLG_00091	52.75	99.23	26.18	21.63	65.13	62.83	106.88	135.32	111.74	103.84	105.71	41.81	48.7	45.32	-1.545	3.817e-06	-0.1799	0.6397	0.6943	0.02631	0.3747	0.3235	-0.6017	0.1936	1.3929	0.002916	2.235	2.899e-09	1.8663	6.79e-06	0.891726	0.3675	0.8628	0.2686	0.5392	0.2598	-0.4838	0.6466	-0.314933	0.5105	-1.353	0.01178	0.995792	0.0524
MVLG_01855	45.47	40.84	26.11	30.49	93.49	43.31	126.79	86.91	84.52	111.43	116.27	46.54	55.26	23.79	-0.4686	0.1629	0.7248	0.02525	1.355	8.229e-06	1.157	0.0008963	0.02688	1	1.22091	0.002927	1.823	2.598e-07	1.56705	6.753e-05	0.451396	0.7762	0.6205	0.6299	0.4156	0.3849	-0.7533	0.3276	-0.188976	0.7183	-1.369	0.008064	1.14307	0.01908
MVLG_06834	82.94	59.04	317.86	306.12	148.24	166.56	119.62	120.79	133.96	144.44	163.42	168.6	351.45	356.4	2.282	1.185e-17	1.244	2.446e-05	0.8066	0.008683	0.9425	0.007164	2.205	4.29e-08	-1.00129	0.002927	-1.471	2.861e-06	-1.39416	3.053e-05	-0.11341	0.9549	-0.4487	0.872	-0.3189	0.4853	0.9019	0.1548	0.140494	0.8182	1.347	0.00713	-1.24458	0.003596
MVLG_01435	5.69	5.37	197.93	154.31	57.53	87.8	30.03	49.8	27.09	14.44	17.67	187.54	214.75	322.75	5.14	5.686e-52	3.82	8.533e-19	2.828	1.104e-11	1.716	8.658e-06	5.68	1.001e-29	-1.28061	0.002976	-2.306	6.018e-09	-3.47582	1.695e-20	0.501333	0.6733	-0.9954	0.4528	-2.119	3.848e-06	1.794	0.001758	-1.12218	0.0227	2.765	2.845e-07	-3.92721	7.087e-19
MVLG_00008	92.5	82.53	227.23	216.37	102.63	118.29	95.5	91.84	58.5	58.71	87.58	159.83	178.11	206.58	1.481	2.282e-08	0.4254	0.1796	0.1396	0.6884	-0.4735	0.1789	1.162	0.004674	-1.01915	0.003123	-1.338	3.327e-05	-2.00872	1.077e-09	-0.357834	0.7307	-0.2984	0.9799	-0.915	0.01806	0.6792	0.3663	-0.606344	0.1501	0.9747	0.08278	-1.62299	9.321e-05
MVLG_05492	52.49	57.09	50.11	47.58	109.59	95.01	147.75	153.06	86.46	96.73	83.73	68.21	53.42	48.77	-0.03454	0.9294	0.9724	0.0009652	1.489	4.579e-07	0.551	0.1301	0.04768	0.9255	1.03984	0.003123	1.525	1.989e-06	0.529818	0.1999	0.0390761	1	0.506	0.7504	-0.4392	0.3061	-0.9774	0.1105	-0.932707	0.01335	-1.485	0.00183	0.510554	0.4031
MVLG_06026	66.67	55.41	25.42	25.96	77.3	79.21	128.28	94.64	80.02	139.81	94	0	47.33	56.72	-1.093	0.007494	0.4592	0.2311	0.9554	0.003752	0.7788	0.03187	-0.1774	0.4014	1.57617	0.003158	2.044	4.435e-06	1.80936	8.265e-05	0.865071	0.6927	0.4801	0.9331	0.2952	0.6303	-0.6976	0.293	-0.170105	0.7617	-1.172	0.01575	0.973488	0.01682
MVLG_00844	25.69	19.23	50.33	84.93	102.23	170.4	111.61	111.03	86.88	78.45	84.66	130.07	50.28	49.27	1.735	3.118e-10	2.705	4.462e-20	2.349	6.825e-15	1.747	4.726e-07	1.595	8.587e-05	1.00485	0.003165	0.6129	0.1082	-0.0450344	0.9269	-0.185439	0.9934	-0.3703	0.9491	-0.9746	0.008755	-1.15	0.06179	-0.594739	0.1514	-0.782	0.2503	0.135397	0.9509
MVLG_03501	362.37	205.26	185.22	187.33	92.12	99.41	81.91	108.22	32.35	51.49	48.73	151.48	154.72	190.17	-0.4602	0.09331	-1.474	2.67e-07	-1.534	2.314e-07	-2.805	1.017e-18	-0.7	0.07242	-0.976973	0.003165	-1.069	0.0009972	-2.40445	1.169e-13	-0.275376	0.8313	-0.06961	1	-1.353	0.0001458	0.7213	0.284	-1.27493	0.0003823	0.7849	0.1768	-2.09744	1.044e-07
MVLG_06253	122.63	151.86	201.07	182.95	73.69	113	49.16	78.97	67.39	68.27	80.36	145.54	98.35	162.58	0.6157	0.02576	-0.465	0.1478	-1.088	0.0006253	-1.053	0.001367	0.03759	0.9629	-1.04296	0.003217	-1.702	2.693e-07	-1.7225	2.586e-07	-0.620176	0.4188	-0.6327	0.6602	-0.6051	0.1509	0.4454	0.6372	0.0301969	0.9911	1.063	0.06287	-1.08065	0.0166
MVLG_06179	0.02	0.04	26.63	23.31	72.83	41.17	102.92	62.47	38.92	96.39	63.55	0	38.25	34.52	9.719	1.679e-43	10.84	2.069e-61	11.36	2.887e-77	10.92	1.715e-66	9.948	3.417e-23	1.14806	0.003322	1.635	2.165e-06	1.09392	0.005887	0.24021	1	0.5041	0.8173	0.01616	1	-0.9029	0.04985	-0.472801	0.282	-1.404	0.0004921	0.910085	0.01249
MVLG_00225	86.45	90.25	18.01	12.2	33.6	48.27	56	59.22	71.8	86.38	74.29	29.81	30.46	27.85	-2.413	2.53e-13	-1.019	0.002025	-0.5835	0.07439	-0.307	0.3988	-1.493	0.0006612	1.42361	0.003383	1.828	6.627e-06	2.05034	8.813e-07	0.871355	0.3866	0.4219	0.9606	0.6917	0.1353	-0.5341	0.6136	0.27881	0.6142	-0.9596	0.1353	1.19796	0.0189
MVLG_05283	51.75	51.17	69.57	41.58	24.4	15.67	14.46	10.28	70.42	61.54	41.67	29.96	29.16	54.08	0.2518	0.4659	-1.285	0.001521	-1.956	1.923e-07	0.05926	0.8931	-0.2568	0.6315	-1.49377	0.003383	-2.194	3.377e-07	-0.24363	0.6255	-0.550236	0.6507	-0.6808	0.908	1.328	0.007137	0.9631	0.3331	2.03406	6.399e-06	1.658	0.01933	0.33088	0.6601
MVLG_06441	2.82	3.81	261.29	310.8	136.26	142.34	77.35	157.45	16.63	39.36	49.29	164.21	289.64	481.14	6.563	3.425e-82	5.473	2.711e-49	5.152	1.853e-44	3.387	7.982e-18	6.781	4.036e-39	-1.05626	0.003383	-1.412	4.022e-05	-3.23898	5.709e-22	0.17816	0.98	-0.3255	0.9819	-2.108	7.145e-09	1.246	0.03067	-1.78527	7.635e-07	1.552	0.002548	-3.38649	7.558e-17
MVLG_03831	44.16	142.26	132.31	151.21	220.84	354.14	442.99	449.32	244.16	251.8	395.32	258.09	168.72	202.03	0.7171	0.01253	1.702	5.157e-09	2.281	1.784e-14	1.556	6.921e-06	1.178	0.004254	1.01964	0.003549	1.561	8.577e-07	0.783111	0.04448	0.411733	0.7045	0.5621	0.6602	-0.1608	0.7476	-0.5813	0.4636	-0.714921	0.06982	-1.147	0.02285	0.387486	0.5507
MVLG_04400	328.84	285.38	1105	1052.41	460.69	607.47	138.19	313.24	61.7	71.62	162.3	363.59	2460.22	2325.86	1.974	4.749e-14	0.9778	0.0007577	-0.3056	0.3884	-1.602	5.27e-07	2.74	8.147e-12	-0.958827	0.003562	-2.277	1.815e-13	-3.63166	7.385e-28	0.723327	0.2897	-1.289	0.006593	-2.596	3.085e-14	1.697	0.0003188	-1.30745	0.0003356	2.97	9.589e-11	-4.33152	1.555e-26
MVLG_01420	561.32	488.15	1035.98	1187.59	2142.34	2187.65	1613.21	2107.18	882.66	658.64	562.35	1694.26	518.4	321.61	1.25	2.521e-06	2.165	2.621e-14	1.921	6.776e-11	0.4906	0.1805	0.5325	0.1779	0.94992	0.003796	0.674	0.05639	-0.810659	0.02446	-0.760214	0.3679	-0.2542	0.9938	-1.689	8.063e-07	-1.667	0.0008665	-1.42197	5.419e-05	-1.414	0.005699	-0.0603456	0.8783
MVLG_00564	374.75	435.96	623.94	848.54	1360.18	1602.45	1293.7	1023.88	413.39	685.36	605.2	524.63	724.8	644.5	1.007	0.0004635	2.012	9.956e-12	1.656	4.353e-08	0.7691	0.0317	1.124	0.0114	1.03879	0.003829	0.6489	0.101	-0.299332	0.4842	0.0752444	1	-0.3715	0.9491	-1.264	0.0004957	-0.9504	0.07633	-0.881154	0.02269	-0.5799	0.325	-0.332832	0.6841
MVLG_01463	38.82	35.25	2.99	1.51	14	23.06	21.11	28.42	37.55	16.74	15.86	0	3.79	4.53	-3.887	1.607e-10	-0.8979	0.05374	-0.5802	0.1664	-0.8436	0.0244	-3.099	7.075e-07	2.91759	0.003829	3.236	6.26e-05	2.98759	6.466e-05	NA	NA	0.3058	1	0.04158	0.9457	NA	NA	-0.259239	0.7268	-2.539	0.001882	2.28712	0.001139
MVLG_06803	68.22	89.08	189.59	221.7	298.5	520.21	421.07	624.72	694.66	381.36	740.73	548.37	366.14	773.6	1.523	3.89e-08	2.485	2.896e-17	2.779	5.49e-20	2.856	1.373e-15	2.956	5.478e-13	0.998111	0.00383	1.256	0.0001083	1.28343	0.000473	1.38981	0.003703	0.2808	0.9804	0.3598	0.4387	0.4145	0.6519	0.0872465	0.8938	0.1258	0.9212	-0.0855044	0.9301
MVLG_03071	29.24	27.19	47.58	61.91	189.34	80.91	127.72	102.54	21.2	31.84	39.52	21.14	81.29	140.74	1.103	0.001391	2.324	9.835e-13	2.095	5.163e-11	0.1199	0.8232	1.953	2.112e-05	1.2481	0.003832	0.992	0.01839	-1.0434	0.01106	0.805901	0.4754	-0.2375	1	-2.222	3.176e-09	-0.4303	0.5387	-1.96997	7.485e-08	-0.1895	0.744	-1.81946	0.0001377
MVLG_04885	0.1	0	306.37	317.3	120.73	187.29	57.2	71.16	34.07	101.04	54.85	132.98	182.28	115.01	12.41	1.118e-95	11.35	5.818e-62	10.03	2.228e-45	9.994	5.74e-51	11.23	1.138e-31	-1.01945	0.004025	-2.391	4.252e-13	-2.54242	1.177e-14	-1.15093	0.01746	-1.347	0.009753	-1.448	7.859e-05	-0.1156	0.9498	-0.096724	0.8391	1.219	0.03461	-1.35412	0.002385
MVLG_01506	8.31	6.96	69.68	57.65	31.76	23.82	8.12	17.85	10.99	22.34	12.04	65.7	78.51	65.95	3.198	1.029e-25	1.94	4.161e-07	0.6774	0.07963	0.9207	0.01394	3.314	1.04e-13	-1.22092	0.004036	-2.516	3.799e-10	-2.34076	2.443e-11	0.0754596	1	-1.257	0.1937	-1.046	0.01802	1.313	0.0371	0.203062	0.8786	2.531	7.952e-06	-2.38862	2.204e-08
MVLG_00422	67.5	74.75	14.96	14.75	36.41	33.65	90.58	62	37.61	60.04	49.91	27.23	27.42	24.81	-2.128	2.304e-12	-0.9487	0.002592	0.136	0.7044	-0.6669	0.04958	-1.363	0.001052	1.2102	0.004316	2.263	7.053e-11	1.40145	0.0005117	0.718422	0.4441	1.07	0.06244	0.261	0.6321	-0.4725	0.6348	-0.796066	0.04273	-1.539	0.001878	0.706972	0.2072
MVLG_02731	57.27	63.43	37.2	41.55	2.5	14.37	6.78	9.86	32.63	41.02	29.79	0	27.94	16.72	-0.4723	0.22	-2.722	1.282e-07	-2.902	2.997e-10	-0.8398	0.01439	-1.3	0.001331	-2.18344	0.004429	-2.406	7.442e-05	-0.427717	0.4065	-0.864615	0.2339	-0.1883	1	1.856	0.005684	1.317	0.6865	2.05223	0.0004312	1.504	0.3276	0.481913	0.2672
MVLG_04416	1.68	1.37	534.52	619.32	278.17	337.59	128.97	229.28	28.58	38.47	62.47	561.09	515.79	594.59	8.699	5.578e-129	7.745	7.485e-95	6.913	8.503e-75	4.706	3.021e-31	8.567	1.252e-56	-0.919039	0.004429	-1.784	2.899e-09	-4.05222	7.61e-34	-0.168535	0.9331	-0.8408	0.1826	-3.057	1.867e-19	0.7728	0.212	-2.21001	1.047e-10	1.605	0.0005463	-3.85866	3.809e-22
MVLG_00884	108.62	97.22	271.84	221.25	126.75	110.9	67.2	122.78	57.89	43.66	49.13	226.51	215.93	389.87	1.409	2.908e-07	0.2964	0.3964	-0.1008	0.8493	-1.112	0.0009265	1.615	8.983e-05	-1.07572	0.00444	-1.507	1.952e-05	-2.57239	5.069e-14	0.167502	0.9732	-0.401	0.9762	-1.424	0.0003227	1.26	0.03239	-1.02067	0.012	1.641	0.001514	-2.70684	4.282e-11
MVLG_00582	419.48	866.17	27.27	26.25	44.3	82.33	73	122.73	215.82	133.25	264.32	288.71	105.57	142.56	-4.467	1.691e-47	-3.26	4.844e-26	-2.707	1.364e-18	-1.797	1.593e-08	-1.967	5.716e-07	1.23901	0.004473	1.756	1.445e-06	2.62039	2.254e-11	2.44735	2.224e-07	0.5406	0.7668	1.45	0.0002707	1.243	0.02384	0.913713	0.0278	0.6923	0.2418	0.16322	0.9031
MVLG_05715	13.13	12.3	119.89	102.13	56.3	46.42	50.89	34.76	38.56	40.31	32.23	25.24	23.08	23.82	3.266	3.196e-28	2.093	2.693e-09	1.823	5.798e-08	1.436	5.316e-05	1.007	0.06246	-1.1359	0.004682	-1.437	4.188e-05	-1.88488	5.865e-08	-2.29599	7.028e-06	-0.2847	1	-0.6755	0.1357	-1.14	0.1306	-0.370936	0.475	-0.8466	0.2825	0.439729	0.5914
MVLG_02719	501.56	618.46	24.95	4.96	37.45	42.64	51.95	111.61	38.3	30.12	35.85	10.1	23.73	35.99	-5.099	2.969e-55	-3.726	2.226e-31	-2.767	4.882e-19	-4.148	3.919e-36	-4.257	2.337e-26	1.40446	0.004744	2.331	1.285e-09	0.90386	0.04791	0.795781	0.6091	0.9513	0.1855	-0.4377	0.375	-0.5933	0.4518	-1.38744	0.0001954	-1.561	0.001555	0.130086	0.8143
MVLG_05737	0.52	0.43	182.63	177.12	422.65	296.33	387.14	335.39	116.74	316.1	244.48	269.24	226.14	183.76	8.685	2.782e-86	9.616	6.547e-93	9.596	3.852e-95	8.8	4.581e-67	8.91	2.537e-40	0.962977	0.004744	0.9129	0.007046	0.0449474	0.9494	0.191945	0.9283	-0.03031	1	-0.8454	0.02453	-0.7497	0.2482	-0.803634	0.0363	-0.7192	0.2212	-0.117538	0.8777
MVLG_06034	363.61	280.6	719.69	903.88	1552.89	1570.15	1534.82	1233.46	1034.49	1333.56	1271.25	984.37	1002.13	953.58	1.492	1.551e-08	2.386	5.753e-17	2.179	1.61e-13	1.917	3.256e-08	1.765	8.76e-06	0.927	0.004857	0.6873	0.05052	0.365416	0.3829	0.234492	0.8967	-0.2193	1	-0.4878	0.2319	-0.6731	0.2789	-0.257007	0.5952	-0.4562	0.4695	0.163467	0.8194
MVLG_02195	2	2.74	5.51	3.3	17.57	25.44	15.06	10.42	6.28	8.74	5.62	0	16.04	1.69	1.022	0.2117	3.26	6.23e-10	2.512	5.41e-08	1.478	0.000301	2.124	0.01846	2.23577	0.005041	1.473	0.08935	0.391723	0.7417	1.03335	0.8297	-0.7619	0.7504	-1.809	0.0004666	-1.193	0.09252	-1.02485	0.05601	-0.4258	0.4991	-0.625226	0.9133
MVLG_05853	234.37	103.35	675.03	433.42	1335.22	855.71	688.91	980.05	172.28	248.96	243.29	550.69	647.83	1123.23	1.894	1.986e-12	2.8	8.83e-22	2.394	1.384e-15	0.4205	0.2663	2.445	1.537e-09	0.941833	0.005046	0.5085	0.1808	-1.52905	5.356e-06	0.517168	0.5886	-0.4123	0.8929	-2.401	1.283e-12	-0.4103	0.5777	-1.97661	8.171e-09	-0.001032	0.9994	-2.01208	4.546e-07
MVLG_05639	1539.68	1872.89	562.43	761.74	1105.35	1407.53	1456.47	1276.63	1275.83	1361.68	1144.79	1171.61	846.12	654.34	-1.225	3.055e-06	-0.3423	0.2593	-0.267	0.4051	-0.4918	0.16	-0.8853	0.02357	0.917209	0.005261	0.9569	0.003244	0.676075	0.07739	0.299563	0.8228	0.0608	1	-0.1668	0.7316	-0.5919	0.3944	-0.216494	0.6619	-0.6571	0.2573	0.402779	0.4983
MVLG_00703	257.87	46.77	3.3	0	10.92	11.62	12.41	6.91	5.84	5.1	10.64	40.02	0.71	0	-6.354	2.553e-45	-3.639	8.717e-23	-3.821	2.049e-27	-4.455	1.064e-38	-5.826	2.005e-15	2.67416	0.00531	2.494	0.004659	1.84068	0.01603	NA	NA	-0.1966	1	-0.8346	0.17	-2.159	0.5749	-0.614821	0.313	-1.96	0.5592	1.3204	0.7566
MVLG_03410	177	157.16	82.14	76.24	30.96	39.51	6.38	19.6	39.13	25.28	58.48	113.65	77.23	87.75	-0.9359	0.0009963	-2.153	4.475e-11	-3.837	8.939e-25	-2.141	2.292e-11	-0.8378	0.05577	-1.17948	0.005341	-2.897	5.038e-12	-1.25549	0.0005762	0.055252	1	-1.675	0.02668	-0.0009618	1	1.257	0.04733	1.65902	0.0007807	2.878	5.455e-07	-1.30105	0.004155
MVLG_00523	108.32	102.61	730.5	768.59	358.79	442.94	229.5	298.55	249.4	298.41	340.48	524.89	804.49	766.45	2.969	1.548e-28	2.02	1.48e-12	1.368	3.938e-06	1.387	5.945e-05	2.844	1.593e-12	-0.912867	0.005482	-1.6	1.39e-07	-1.63933	5.182e-07	-0.165116	0.9272	-0.6641	0.483	-0.6511	0.09634	0.7667	0.2305	0.0214332	0.9866	1.424	0.002932	-1.44268	0.0003881
MVLG_06976	50.3	76.38	329.59	107.22	135.37	82.29	51.08	29.55	19.17	158.91	8.28	16.43	54.43	32.5	1.916	3.308e-12	0.841	0.009672	-0.5629	0.09015	-0.03796	0.8689	-0.4766	0.2401	-1.03517	0.005595	-2.464	1.809e-13	-2.02502	1.096e-09	-2.42558	3.325e-08	-1.417	0.007222	-0.9186	0.02051	-1.379	0.009974	0.522247	0.2917	0.05172	1	0.458239	0.3817
MVLG_00739	0.02	0.02	4.96	5.39	22.88	10.16	102.08	39.39	196.21	480.49	246.2	5.97	11.72	6.97	7.957	2.23e-10	9.554	3.757e-23	11.65	6.331e-74	13.64	5.638e-91	8.689	1.34e-09	1.61881	0.005884	3.678	2.466e-20	5.5642	6.17e-35	0.749203	0.7283	2.07	9.04e-06	4.008	9.693e-22	-0.8528	0.3264	1.95499	1.775e-07	-2.913	4.901e-09	4.8501	2.188e-25
MVLG_04559	87.71	78.33	18.61	15.61	49.02	29.18	54.56	44.71	68.43	67.32	68.72	44.75	31.8	23.28	-2.143	7.649e-13	-1.021	0.0009833	-0.7019	0.02365	-0.4308	0.2268	-1.39	0.001299	1.15237	0.006232	1.442	9.62e-05	1.65851	2.169e-05	0.706726	0.4044	0.3085	0.9804	0.5743	0.2004	-0.4208	0.7489	0.281279	0.5873	-0.7255	0.3084	0.961684	0.0762
MVLG_04227	41.46	34.84	110.45	112.31	63.34	54.22	50.57	55.91	36.02	39.53	40.98	56.44	89.82	90.89	1.683	1.991e-10	0.7	0.02141	0.5143	0.101	-0.1204	0.7573	1.18	0.004448	-0.948895	0.006306	-1.166	0.0003752	-1.85951	1.628e-08	-0.541428	0.444	-0.1951	1	-0.8379	0.0317	0.4214	0.6869	-0.631648	0.1277	0.6122	0.3754	-1.28214	0.003179
MVLG_07272	44.31	50.48	137.87	90.72	41.71	49.13	11.16	30.54	15.26	11.69	23.98	83.71	246.55	299.88	1.419	5.778e-06	0.03506	0.9586	-1.336	0.00439	-1.498	1.558e-05	2.521	4.568e-09	-1.34229	0.006306	-2.743	6.018e-09	-2.96851	1.396e-14	1.06135	0.1268	-1.362	0.3491	-1.548	0.002696	2.409	3.346e-05	-0.193606	0.7236	3.725	1.676e-10	-3.99021	1.453e-19
MVLG_04095	136.87	193.73	116.58	93.9	51.23	44.76	36.16	37.96	28.39	16.47	26.33	29.49	81.07	112.07	-0.5204	0.07795	-1.711	1.941e-07	-2.129	8.227e-11	-2.938	3.948e-19	-0.8223	0.02754	-1.15398	0.006324	-1.605	1.517e-05	-2.46743	5.172e-12	-0.343195	0.728	-0.4278	0.9762	-1.238	0.00569	0.8211	0.3922	-0.798908	0.08571	1.244	0.05559	-2.08096	6.012e-06
MVLG_04985	65.27	49.19	64.97	61.64	68.34	180.83	119.19	282.37	82.98	66.53	77.74	50.71	41.29	90.02	0.2886	0.3494	1.242	2.88e-05	1.856	3.851e-10	0.2727	0.4817	0.222	0.7109	0.992994	0.006335	1.57	1.104e-06	-0.067845	0.8939	-0.10742	0.9871	0.6012	0.5863	-0.986	0.009493	-1.077	0.05338	-1.58276	6.527e-06	-1.691	0.0001961	0.0637888	0.9347
MVLG_03847	0.48	0.34	83.15	98.23	24.6	54.86	5.26	19.44	1.01	0.74	3.36	70.74	95.8	123.75	7.888	5.232e-60	6.661	2.443e-25	4.666	1.611e-13	1.974	0.0006019	8.039	5.383e-29	-1.18819	0.006348	-3.217	2.033e-13	-5.97221	6.583e-43	0.117727	1	-1.986	0.00721	-4.704	2.349e-20	1.317	0.0493	-2.73594	3.226e-06	3.241	3.745e-08	-6.03705	1.441e-31
MVLG_07335	25.03	17.64	151.17	136.69	32.39	24.64	6.75	41.6	13.58	12.19	25.53	106.71	235.1	437.34	2.932	2.109e-10	0.5541	0.5553	-0.1313	1	-0.001075	1	4.309	1.305e-17	-2.30153	0.007014	-3.015	4.471e-05	-2.98909	2.384e-09	1.33007	0.09856	NA	NA	-0.5731	0.6228	3.632	2.074e-06	0.099028	0.9671	4.272	4.324e-08	-4.28543	2.756e-17
MVLG_06969	256.29	542.82	26.25	26.66	40.38	103.81	87.93	176.98	248.59	91.02	197.46	117.16	68.82	157.27	-3.79	1.081e-29	-2.371	2.829e-13	-1.593	4.364e-07	-1.261	0.0001167	-1.698	3.39e-05	1.44572	0.007285	2.187	1.2e-07	2.48462	6.184e-09	2.03108	0.0004582	0.766	0.5143	1.1	0.01212	0.6061	0.5384	0.334578	0.5391	-0.1763	0.8585	0.453209	0.4818
MVLG_06403	309.01	324.34	77.67	74.95	195.44	152.99	163.02	162.98	230.42	145.39	138.63	244.64	58.83	51.28	-1.904	3.265e-10	-0.7762	0.01443	-0.8973	0.004356	-0.9403	0.005045	-1.922	0.0001661	1.15831	0.007303	1.007	0.01285	0.914456	0.02896	-0.0704717	1	-0.1315	1	-0.1769	0.7501	-1.186	0.2144	-0.0301726	0.9671	-1.051	0.2503	0.959323	0.2214
MVLG_01508	56.22	62.27	75.48	86.69	45.89	33.38	45.71	46.15	16.06	36.45	30.97	72.67	76.13	89.26	0.5864	0.04168	-0.5114	0.1335	-0.3357	0.3298	-1.18	0.0002661	0.5252	0.2643	-1.06435	0.007381	-0.9213	0.01284	-1.83023	7.579e-08	-0.103819	0.983	0.1657	1	-0.691	0.1078	0.9777	0.1484	-0.847922	0.0338	0.8101	0.204	-1.69832	7.638e-05
MVLG_05420	59.7	51.17	30.87	26.66	15.89	8.65	15.63	16.12	49.72	38.38	46.23	17.4	38.87	33.92	-0.8094	0.00649	-2.107	1.101e-09	-1.775	5.691e-08	-0.4599	0.1976	-0.6378	0.1045	-1.26013	0.007381	-0.9616	0.024	0.29839	0.5276	0.132041	1	0.323	1	1.635	0.0001962	1.404	0.04128	1.32216	0.001681	1.077	0.1066	0.202561	0.7192
MVLG_05473	82.19	58.98	30.7	30.74	83.34	65.2	79.66	59.66	191.74	130.86	123.91	173.72	50.45	23.48	-1.05	0.001663	0.1598	0.6758	0.04979	0.9227	0.9693	0.005612	-0.2779	0.8857	1.23975	0.007381	1.101	0.01078	1.96915	8.879e-07	0.718461	0.3213	-0.1227	1	0.7954	0.06872	-0.4759	0.8693	0.937458	0.02428	-0.3416	0.9332	1.21654	0.0624
MVLG_00906	178.51	161.53	500.41	501.84	248.72	297.76	154.05	190.7	89.25	69.22	120.33	339.63	351.96	369.45	1.697	6.469e-11	0.7741	0.007572	0.05875	0.8653	-1.007	0.002199	1.126	0.004622	-0.886602	0.007426	-1.636	6.26e-08	-2.75654	1.719e-17	-0.608922	0.3598	-0.7267	0.347	-1.795	1.498e-07	0.2991	0.7807	-1.059	0.004162	1.02	0.05161	-2.12306	5.917e-08
MVLG_02042	101.66	95.29	455.38	676.12	691.79	1360.45	927.57	1360.82	299.61	346.76	496.83	363.89	315.57	375.63	2.661	9.386e-24	3.489	1.211e-32	3.584	2.146e-31	1.823	1.377e-07	1.894	1.494e-06	0.864748	0.007751	0.9225	0.003893	-0.897796	0.009629	-0.807155	0.1432	0.08082	1	-1.682	6.346e-07	-1.646	0.0001018	-1.75708	2.547e-07	-1.735	2.88e-05	-0.0623433	0.9467
MVLG_05647	192.38	191.05	48.63	45.65	104.22	97.17	196.6	133.53	188.62	203.94	236.92	113.88	112.84	67.74	-1.886	8.01e-11	-0.8478	0.005784	-0.1696	0.6073	0.01943	0.976	-0.9236	0.02688	1.07013	0.00781	1.717	4.691e-07	1.85005	1.06e-06	0.918155	0.1947	0.6639	0.5314	0.8506	0.041	-0.1317	0.9639	0.2006	0.709	-0.7926	0.1923	0.952512	0.04997
MVLG_01152	11.45	12.45	291	299.85	183.71	138.84	120.62	125.57	59.46	87.1	90.01	222.5	264.31	282.61	4.761	2.702e-58	3.823	1.242e-34	3.399	6.015e-27	2.603	3.713e-13	4.515	1.169e-24	-0.905432	0.008161	-1.36	1.478e-05	-2.21719	8.843e-12	-0.285383	0.8225	-0.4334	0.8865	-1.239	0.0005913	0.6368	0.3866	-0.794188	0.04215	1.068	0.0435	-1.89963	1.909e-06
MVLG_04254	62.46	50.46	67.47	77.91	31.41	39.93	25.61	22.53	84.11	100.85	152.15	47.84	99	78.65	0.5056	0.07977	-0.5713	0.08931	-1.184	0.0002329	0.8689	0.0136	0.6009	0.2128	-1.04092	0.008296	-1.687	1.114e-06	0.306144	0.4953	0.0563626	1	-0.6262	0.6985	1.422	0.0004254	1.108	0.09172	2.06084	1.767e-07	1.733	0.0008641	0.287599	0.6016
MVLG_05729	0.28	0.12	134.65	155.84	65.35	78.17	40.44	52.8	10.33	9.81	15.37	169.78	141.16	190.26	9.576	1.282e-78	8.508	3.039e-45	7.816	3.714e-43	5.753	4.397e-29	9.713	2.125e-36	-1.03163	0.008755	-1.76	4.648e-07	-3.89438	8.679e-28	0.111457	0.993	-0.7023	0.6079	-2.787	7.236e-13	1.162	0.0528	-2.08145	8.507e-08	1.853	0.0002404	-3.98338	1.148e-20
MVLG_01281	3.27	4.38	125.63	130.91	57.07	56.94	49.16	56.24	21.26	32.06	29.85	44.1	134.81	194.09	5.202	2.236e-50	3.978	5.526e-19	3.811	1.662e-22	2.839	3.208e-13	5.392	9.175e-27	-1.18767	0.008765	-1.389	0.0004438	-2.42418	1.14e-11	0.150161	1	-0.1773	1	-1.161	0.01056	1.346	0.04769	-0.977946	0.02302	1.516	0.0109	-2.53628	6.613e-09
MVLG_01621	38.28	27.65	134.99	130.98	65.31	76.43	35.31	52.24	22.1	15.3	24.4	75.74	65.33	109.3	2.153	7.855e-16	1.195	5.836e-05	0.4361	0.1711	-0.8305	0.01461	1.43	0.0004671	-0.921565	0.008791	-1.714	7.832e-08	-3.03516	7.06e-20	-0.761058	0.2127	-0.7674	0.3591	-2.04	8.361e-09	0.1802	0.9246	-1.2657	0.0007367	0.9365	0.1047	-2.24807	3.649e-08
MVLG_02920	123.72	119.73	27.28	31.79	40.31	101.51	64.12	150.04	74.15	53.62	49.33	35.45	30.4	37.05	-1.899	9.461e-09	-0.6646	0.05121	-0.1772	0.6798	-1.146	0.0005908	-1.718	0.0002278	1.26564	0.008791	1.716	1.395e-05	0.69958	0.1437	0.133802	0.992	0.4784	0.8798	-0.5002	0.3125	-1.112	0.1538	-0.98039	0.01418	-1.613	0.005295	0.585604	0.4198
MVLG_06660	2.04	1.05	8.91	11.97	55.65	19.1	143.49	61.19	151.25	382.48	260.5	0	30.14	15.76	2.896	4.843e-05	4.654	2.448e-19	6.135	6.419e-55	7.371	1.326e-56	3.99	2.46e-08	1.77068	0.008902	3.227	1.464e-12	4.40363	2.175e-21	1.03869	0.7677	1.463	0.01414	2.691	1.775e-10	-0.7174	0.2972	1.2464	0.001442	-2.167	5.226e-06	3.39751	6.745e-15
MVLG_05060	568.7	599.53	680.41	767.96	386.67	413.45	287.3	381.15	159.99	179.55	235.75	318.48	468.23	444.04	0.4475	0.1012	-0.4605	0.1245	-0.763	0.01157	-1.714	7.125e-08	-0.3883	0.3302	-0.873603	0.008913	-1.209	0.0001124	-2.21792	6.53e-12	-0.875828	0.08321	-0.3132	0.9762	-1.27	0.0003387	0.01486	1	-0.947182	0.01143	0.3224	0.7018	-1.31003	0.001752
MVLG_05940	0.05	0	146.24	154.55	60.42	84.79	34.8	47.74	7.9	12.95	15.68	79.57	156.4	153.87	12.17	3.022e-73	11.07	4.959e-39	10.18	9.684e-35	8.485	2.881e-27	11.95	9.36e-32	-1.05847	0.009061	-1.995	3.367e-08	-3.83539	4.365e-27	-0.141618	0.9331	-0.91	0.3396	-2.703	6.306e-12	0.927	0.2252	-1.79191	6.84e-06	1.82	0.0008786	-3.6642	1.622e-17
MVLG_05844	485.59	716.13	37.73	28.11	44.82	111.36	103.17	175.48	1214.54	1247.17	1300.05	430.9	240.59	72.21	-4.057	2.791e-38	-2.84	1.02e-19	-2.088	9.479e-12	0.9681	0.005409	-1.428	0.0005871	1.25047	0.00909	1.966	1.842e-07	4.97217	3.738e-32	2.57656	1.185e-07	0.738	0.483	3.788	1.109e-20	1.359	0.01345	3.05309	6.203e-15	0.611	0.3317	2.38754	1.575e-08
MVLG_00476	153.61	164.87	197.36	198.6	109.34	98.32	55.04	99.59	54.92	40.85	60.28	128.4	158.4	208.03	0.4505	0.1106	-0.5389	0.08939	-1.03	0.00125	-1.736	6.793e-08	0.2023	0.7416	-0.954902	0.009172	-1.479	1.142e-05	-2.23865	2.159e-11	-0.288623	0.8121	-0.4957	0.872	-1.211	0.001565	0.6815	0.3936	-0.711221	0.0873	1.161	0.0371	-1.91878	3.979e-06
MVLG_07303	589.99	847.8	31.92	16.48	94.24	58.42	118.56	162.21	317.22	134.3	167.59	509.93	79.96	42.82	-4.741	8.529e-41	-3.16	3.784e-21	-2.32	2.418e-13	-1.848	9.504e-09	-2.526	6.549e-07	1.6003	0.009172	2.411	1.074e-07	2.84925	3.847e-10	2.13682	0.0003836	0.8313	0.483	1.304	0.003248	0.5998	0.3687	0.481368	0.333	-0.2306	1	0.628652	0.6458
MVLG_00448	1.35	1.41	27.57	22.71	14.05	7.9	7.52	9.02	3.51	4.79	5.93	19.75	58.18	85.04	4.313	4.251e-37	3.052	1.853e-11	2.576	8.227e-11	1.682	1.132e-05	5.536	1.234e-29	-1.22342	0.009232	-1.731	1.751e-05	-2.68892	1.952e-13	1.18367	0.05024	-0.4807	0.9762	-1.388	0.003335	2.416	8.55e-06	-0.902676	0.04884	2.886	2.429e-08	-3.83825	2.513e-19
MVLG_00680	16.64	18.07	1907.37	2101.17	1113.15	1120.21	435.09	919.93	112.51	176.61	301.91	1976.25	2170.04	2576.26	6.997	5.283e-101	6.102	2.241e-71	5.344	1.812e-54	3.498	1.062e-20	7.161	6.88e-47	-0.861158	0.009632	-1.651	5.217e-08	-3.55792	3.141e-27	0.124383	0.9804	-0.7653	0.2863	-2.621	7.733e-15	1.005	0.06751	-1.85	7.651e-08	1.762	0.0001241	-3.65662	2.019e-20
MVLG_02493	15.04	10.06	31.1	9.69	61.92	38.65	49.63	72.47	15.42	29.45	45.09	11.85	65.24	179.52	0.8467	0.03706	2.081	2.668e-09	2.308	1.214e-12	1.209	0.000842	3.144	1.548e-12	1.26545	0.01004	1.464	0.00033	0.307135	0.5953	2.2553	2.735e-05	0.2226	1	-0.8915	0.03571	0.9994	0.2094	-1.11255	0.003852	0.7641	0.3601	-1.92126	1.464e-05
MVLG_06899	235.13	216.54	468.5	497.29	920.02	845.19	1256.05	963.3	477.7	807.8	540.17	249.9	485.78	344.44	1.234	2.059e-06	2.046	3.198e-13	2.332	2.535e-15	1.305	0.0001529	0.7797	0.06155	0.845486	0.01026	1.099	0.0004129	0.0099314	0.998	-0.49365	0.497	0.2736	0.9799	-0.7624	0.0427	-1.323	0.002719	-1.02428	0.005004	-1.599	0.0001079	0.543246	0.2674
MVLG_03774	194.62	176.69	100.23	92.7	207.95	166.42	283.64	205.26	509.67	365.08	505.94	395.65	371.37	170.59	-0.8059	0.003796	0.08786	0.8031	0.4376	0.1631	1.177	0.0006617	0.7668	0.061	0.926845	0.01028	1.246	0.0001384	1.93303	9.008e-08	1.53446	0.0008002	0.3377	0.9719	1.076	0.005528	0.6306	0.3713	0.753571	0.0666	0.2929	0.7035	0.416762	0.48
MVLG_06107	377.8	415.12	124.86	130.89	285.99	249.69	298.55	258.73	362.86	144.31	148.25	466.55	82.14	82.93	-1.483	3.825e-07	-0.4743	0.1396	-0.4383	0.1713	-0.9191	0.006529	-1.456	0.006712	1.04014	0.0106	1.045	0.005672	0.520067	0.226	-0.0293964	0.9635	0.02351	1	-0.4534	0.3234	-1.014	0.3496	-0.458101	0.3261	-1.029	0.2476	0.500274	0.7077
MVLG_00682	125.79	146.27	117.31	144.05	55.23	67.28	36.83	62.01	253.28	149.17	234.73	216.19	188.32	143.72	0.08173	0.8129	-1.06	0.002083	-1.473	1.727e-05	0.5541	0.1272	0.4883	0.2861	-1.10574	0.01095	-1.555	7.247e-05	0.422067	0.3288	0.362013	0.808	-0.4183	0.9799	1.601	0.00013	1.487	0.009954	2.01978	9.911e-07	1.883	0.0004354	0.0774487	0.9451
MVLG_00741	94.37	83.9	90.76	74.21	28.71	50.45	17.58	29.47	87.23	78.75	88.19	87.71	93.19	90.73	0.02729	0.9416	-1.072	0.001157	-1.942	1.031e-08	-0.197	0.6025	0.1234	0.8554	-1.05961	0.01095	-1.966	1.318e-07	-0.276505	0.5258	0.056096	1	-0.8766	0.483	0.856	0.05416	1.132	0.0829	1.73165	3.879e-05	1.985	0.0001771	-0.306566	0.666
MVLG_05059	259.47	232.4	407.48	561.07	302.35	180.2	102.16	122.53	409.88	196.49	154.74	231.66	183.6	223.95	1.141	5.436e-05	0.07247	0.8723	-1.052	0.00283	0.1157	0.77	0.04768	0.9722	-1.03561	0.01095	-2.19	1.929e-09	-1.07313	0.003698	-1.13566	0.0505	-1.129	0.133	0.03348	0.9589	-0.08137	0.992	1.17798	0.00765	1.039	0.1245	0.0912843	0.9137
MVLG_05046	41.53	34.95	240.59	270.29	119.62	154.82	53.94	70.2	20.79	21.42	30.49	166.33	199.95	232.52	2.882	6.427e-26	1.939	8.266e-11	0.7277	0.0227	-0.7569	0.02689	2.51	8.422e-10	-0.906927	0.01098	-2.153	1.666e-11	-3.69558	1.06e-27	-0.410644	0.6545	-1.221	0.01833	-2.713	1.59e-14	0.5135	0.5502	-1.48737	7.079e-05	1.723	0.0004628	-3.25589	9.233e-16
MVLG_06373	439.07	449.52	962.69	932.61	493.64	553.07	199.74	353.24	85.66	49.35	86.01	755.63	453.54	631.97	1.238	2.171e-06	0.3332	0.2831	-0.6398	0.0431	-2.668	1.005e-16	0.5361	0.2074	-0.869056	0.0112	-1.876	1.183e-09	-3.95617	1.388e-31	-0.741251	0.24	-0.9812	0.08578	-3.013	3.969e-18	0.1526	0.9262	-2.02474	1.111e-08	1.122	0.031	-3.19378	1.592e-15
MVLG_01598	16.63	14.5	25.55	44.24	4.37	22.19	1.5	2.59	20.45	24.18	29.23	10.01	42.08	5.1	1.307	5.187e-05	-0.1183	0.8027	-3.035	3.859e-08	0.5639	0.1373	0.7228	0.2717	-1.38458	0.01135	-4.291	1.788e-14	-0.803626	0.04906	-0.621935	0.4424	-2.878	0.003434	0.6579	0.2531	0.7585	0.6252	3.58833	2.381e-09	3.615	6.693e-06	-0.130523	1
MVLG_00354	4.28	5.21	93.8	100.58	50.12	47.47	15.39	36.23	2.55	4.08	9.15	69.92	68.35	108.16	4.487	1.97e-46	3.436	7.844e-22	2.382	5.151e-11	0.1345	0.861	4.243	6.313e-20	-1.01619	0.01151	-2.106	1.404e-08	-4.40963	1.199e-33	-0.285469	0.8469	-1.052	0.2203	-3.318	7.422e-17	0.7476	0.3623	-2.27899	1.707e-08	1.763	0.001706	-4.1112	1.535e-20
MVLG_06238	273.98	248.81	377.26	476.12	754.83	818.32	1082.04	796.73	680.03	1033.66	856.39	518.6	549.74	372.36	0.8544	0.001563	1.687	2.645e-09	1.902	9.887e-11	1.662	1.479e-06	0.9801	0.01691	0.866473	0.01159	1.047	0.001258	0.746467	0.05011	0.0858194	1	0.2007	1	-0.04566	0.931	-0.7602	0.2068	-0.235387	0.6288	-0.9632	0.05366	0.693511	0.1507
MVLG_07199	14277.4	14224.7	174.74	8.95	144.62	222.74	72.87	111.04	201.49	161.74	232.25	1501.05	205.35	199.77	-7.132	1.328e-105	-6.173	2.462e-76	-7.252	2.849e-86	-6.246	5.94e-69	-4.729	5.248e-34	1.00391	0.01159	-0.1077	0.9296	0.846756	0.02979	2.37033	1.014e-07	-1.089	0.0738	-0.0882	0.8731	1.421	0.004132	1.0037	0.01802	2.494	1.154e-07	-1.54815	0.0001445
MVLG_04711	91.39	70.77	133.34	120.04	275.41	194.1	305.65	257.94	80.07	158.36	143.2	109.98	111.82	113.2	0.7826	0.003583	1.605	1.245e-08	1.834	3.911e-10	0.5204	0.155	0.5244	0.2333	0.85524	0.01176	1.055	0.0009779	-0.322972	0.4252	-0.29547	0.8286	0.2192	1	-1.106	0.001979	-1.132	0.02193	-1.31318	0.0001956	-1.352	0.002425	0.0053869	1
MVLG_06618	52.99	66.34	21.17	22.59	70.63	42.5	104.92	80.91	35.73	49.68	50.84	16.28	42.75	52.39	-1.311	0.0002786	-0.01041	0.9903	0.6933	0.03312	-0.4608	0.1916	-0.3093	0.4446	1.32594	0.01176	2.001	8.998e-07	0.791176	0.1139	0.950865	0.4489	0.6907	0.6383	-0.4683	0.3394	-0.3596	0.7095	-1.14546	0.003075	-1.046	0.05954	-0.135113	0.9634
MVLG_03300	68.44	67	129.75	162.71	272.42	278.96	403.93	330.22	336.97	306.1	303.44	238.67	185.03	113.65	1.25	5.04e-06	2.11	3.292e-13	2.48	1.305e-16	2.101	1.707e-09	1.392	0.0005847	0.89337	0.01179	1.23	0.0001393	0.795859	0.03775	0.0998219	0.9813	0.3567	0.9544	-0.02554	0.9652	-0.768	0.2515	-0.369171	0.4186	-1.126	0.02739	0.713274	0.1712
MVLG_06064	32.46	33.39	18.67	56.9	98.02	88.97	80.78	73.28	86.28	60.16	67.6	23.33	49.86	25.18	0.3401	0.4438	1.594	4.947e-06	1.289	0.0001221	1.044	0.003289	0.3693	0.66	1.27925	0.01179	0.9433	0.05229	0.646978	0.1752	-0.0169945	1	-0.3174	1	-0.5641	0.233	-1.284	0.04641	-0.231256	0.6879	-0.9684	0.1361	0.702398	0.2229
MVLG_06080	26.88	17.99	65.29	54.22	35.48	28.44	26.07	26.69	12.06	16.13	18.88	57.23	81.67	71.25	1.554	7.615e-09	0.5895	0.06277	0.2705	0.4207	-0.6459	0.05892	1.742	1.645e-05	-0.928431	0.01179	-1.278	0.0001282	-2.2561	1.061e-11	0.152326	0.9796	-0.3281	0.9799	-1.254	0.0008251	1.097	0.06174	-0.915834	0.01948	1.421	0.00481	-2.37805	2.855e-09
MVLG_00595	41.78	27.67	20.14	11.05	4.01	2.58	2.76	6.35	5.76	4.04	2.21	12.29	27.7	23.23	-1.006	0.008208	-3.307	1.708e-09	-3.09	5.279e-11	-3.328	9.549e-20	-0.379	0.4045	-2.22038	0.01209	-2.058	0.003337	-2.37901	8.607e-06	0.582498	0.8249	NA	NA	-0.04209	1	2.803	0.001943	-0.258541	0.7997	2.589	0.001647	-2.90955	3.029e-07
MVLG_03441	0.2	0.06	24.14	24.44	60.2	68.79	7.07	25.56	1.48	3.69	5.3	0	62.17	59.67	7.521	1.66e-13	8.877	4.182e-26	6.597	4.322e-11	4.754	3.959e-11	8.677	5.243e-15	1.38338	0.01266	-0.924	0.3157	-2.85657	4.499e-08	1.14534	0.3556	-2.269	0.001594	-4.175	1.13e-19	-0.229	0.6782	-1.92053	0.0004178	1.977	0.03021	-3.9761	6.804e-14
MVLG_06637	28.88	21.92	56.73	39.96	20.78	25.56	10.55	23.06	46.07	44.36	37.45	50.6	46.39	38.53	1.068	0.0002043	-0.04256	0.938	-0.6408	0.096	0.6053	0.09625	0.8658	0.05186	-1.07072	0.01269	-1.705	9.735e-06	-0.514502	0.2029	-0.241113	0.9105	-0.5992	0.8865	0.6287	0.1903	0.849	0.2681	1.22139	0.006271	1.416	0.01735	-0.250863	0.7331
MVLG_05548	29.62	28.81	47.11	39.77	11.57	19.11	9.04	10.45	75.28	37.41	42.69	60.89	54.97	28.39	0.7139	0.03753	-0.8337	0.0817	-1.575	0.0002458	0.6862	0.05683	0.7373	0.135	-1.50278	0.0129	-2.275	3.676e-06	-0.0744623	0.9197	-0.0199092	1	-0.7469	0.9578	1.506	0.003292	1.496	0.05594	2.27111	2.424e-06	2.239	0.0006426	-0.0295723	0.9862
MVLG_01822	97.84	102.16	28.04	18.85	65.84	34.48	123.6	91.48	62.42	67.64	75.99	40.56	49.96	35.85	-1.961	3.097e-11	-0.9367	0.002426	0.1413	0.6878	-0.6795	0.04582	-1.149	0.004421	1.05497	0.01297	2.104	5.034e-10	1.22831	0.001951	0.769568	0.3814	1.068	0.05618	0.2419	0.6498	-0.2687	0.8296	-0.810849	0.03816	-1.334	0.006495	0.483995	0.4081
MVLG_00024	0.3	0.44	26.39	30.47	103.89	35.6	108.84	76.5	17.24	40.26	39.06	0	38.15	22.11	6.349	1.295e-20	7.558	1.094e-36	7.976	2.564e-56	6.372	2.654e-38	6.333	7.803e-11	1.23469	0.01298	1.625	7.062e-05	-0.0480648	0.8986	-0.0447782	0.8912	0.4075	0.9606	-1.214	0.003157	-1.269	0.01272	-1.60692	1.196e-05	-1.673	0.0001986	0.033869	0.7179
MVLG_00187	40.07	42.82	277.41	338.91	140.79	197.01	86.87	135.39	177.39	206.26	160.94	138.75	304	348.31	3.031	2.041e-28	2.12	7.95e-13	1.451	1.801e-06	2.012	7.917e-09	2.849	4.267e-12	-0.875239	0.01298	-1.58	6.687e-07	-1.07718	0.001753	-0.222879	0.8547	-0.6794	0.5143	-0.1276	0.8084	0.6657	0.3874	0.557916	0.2235	1.333	0.009593	-0.81261	0.09318
MVLG_04545	16.8	12.3	93.16	99.8	58.77	45.04	34.59	36.76	16.2	24.43	25.29	107.32	116.25	138.57	2.871	7.253e-25	1.912	7.084e-10	1.329	2.503e-05	0.4845	0.2051	3.147	5.282e-14	-0.925223	0.01314	-1.539	3.552e-06	-2.44675	1.99e-13	0.237314	0.9028	-0.5913	0.7008	-1.448	9.92e-05	1.18	0.03724	-0.846942	0.03501	1.767	0.0003157	-2.65513	3.3e-11
MVLG_00826	7.36	10.16	24.8	0	0	1.59	0	1.31	1.08	1.32	3.21	0	26.43	41.64	0.6348	0.5026	-3.338	0.000884	-4.395	8.719e-06	-2.218	2.527e-08	1.911	0.001099	-3.68889	0.01336	-4.683	0.0001838	-2.89946	1.919e-05	1.22415	0.3975	NA	NA	1.092	0.6983	4.861	0.0001317	2.14306	0.4253	5.808	1.342e-05	-4.09637	3.493e-12
MVLG_00777	112.56	99.79	298.59	277.14	148.39	161.87	111	140.47	77.01	74.55	69.46	135.17	250.56	271.05	1.583	3.387e-09	0.6396	0.03975	0.2845	0.3866	-0.6204	0.07408	1.257	0.002705	-0.906923	0.01338	-1.295	9.544e-05	-2.25762	1.056e-11	-0.364233	0.6943	-0.3649	0.9727	-1.278	0.0006442	0.5553	0.5442	-0.903844	0.02191	0.9118	0.1348	-1.85363	8.749e-06
MVLG_05301	22.27	21.05	3.35	3.32	9.75	15.47	3.98	16.15	76.77	23.64	51.88	16.22	31.51	1.04	-2.559	2.199e-08	-0.6904	0.1069	-1.296	0.002497	1.052	0.002656	-0.1977	0.6135	1.87536	0.01339	1.241	0.06408	3.5655	9.221e-13	2.28722	0.003302	-0.5985	0.995	1.733	0.000155	0.4187	0.8657	2.3094	6.456e-07	0.9496	0.4307	1.28525	0.007522
MVLG_02898	0.14	0.28	10.21	15.64	39.29	17.9	39.34	24.46	10.88	22.88	22.21	4.53	22.6	7.71	6.051	1.965e-32	7.116	4.359e-49	7.266	4.527e-61	6.334	8.68e-42	6.146	7.825e-18	1.0914	0.01389	1.213	0.002252	0.215803	0.7172	0.0597508	1	0.1387	1	-0.8047	0.05161	-1.025	0.06944	-0.926649	0.01834	-1.159	0.0191	0.203178	0.674
MVLG_00305	126.9	90.29	61.11	108.37	11.33	31.73	9.24	8.84	64.99	114.69	69.45	0	135.99	137.49	-0.1924	0.6482	-2.181	3.524e-05	-3.467	1.972e-11	-0.2301	0.5238	0.5125	0.6854	-1.92885	0.01413	-3.223	6.814e-07	-0.103429	0.8328	0.659552	0.8312	NA	NA	1.921	0.002489	2.586	0.003082	3.22965	9.478e-08	3.858	2.781e-06	-0.724035	0.486
MVLG_00462	368.38	212.09	671.73	948.81	1394.79	1519.6	1442.08	1242.22	966.12	1111.32	859.2	1006.41	880.59	771.31	1.645	3.957e-10	2.443	1.045e-17	2.285	1.089e-14	1.735	5.125e-07	1.728	1.268e-05	0.832389	0.01413	0.6413	0.07	0.0316123	0.9633	0.0466204	1	-0.1701	1	-0.7274	0.05692	-0.764	0.1973	-0.545273	0.1895	-0.5972	0.3106	0.0157695	1
MVLG_04945	608.44	634.9	9.06	4.53	13.57	33.44	20.14	30.98	45.19	51.5	74.47	69.34	33.93	41.64	-6.375	4.152e-65	-4.622	3.306e-40	-4.623	5.107e-40	-3.531	9.275e-28	-3.812	4.973e-19	1.76598	0.01413	1.737	0.0035	2.78814	2.25e-08	2.48607	0.0002313	-0.01074	1	1.071	0.03025	0.7453	0.4447	1.07916	0.02232	0.7405	0.3519	0.275168	0.8324
MVLG_00287	151.14	107.25	41.73	40.64	86.83	85.16	126.71	128.46	100.41	151.31	103.32	34.66	71.08	42.37	-1.502	4.515e-07	-0.4959	0.1268	0.03092	0.936	-0.2192	0.5547	-1.133	0.003916	1.03868	0.0145	1.534	1.376e-05	1.22283	0.002082	0.328771	0.9283	0.5154	0.8059	0.2544	0.6378	-0.6983	0.311	-0.250337	0.6123	-1.218	0.0129	0.935693	0.04309
MVLG_00761	173.08	184.18	331.88	325.16	171.83	189.03	220.49	245.48	81.44	73.15	90.38	208.01	293.74	296.7	1.017	0.0001392	0.1019	0.7717	0.426	0.1761	-1.233	0.0001562	0.7248	0.09787	-0.879585	0.01461	-0.589	0.1186	-2.30339	2.9e-12	-0.331981	0.7539	0.3121	0.9763	-1.35	0.0002262	0.5633	0.497	-1.652	2.841e-06	0.2466	0.8117	-1.93863	1.971e-06
MVLG_04058	25.82	21.09	46.8	55.97	119.32	103.4	143.27	115.81	121.12	146.68	146.1	108.42	92.81	42.14	1.279	0.0001558	2.336	1.044e-12	2.528	1.32e-15	2.493	3.122e-12	1.79	7.014e-05	1.08672	0.01511	1.248	0.001292	1.15491	0.004846	0.465705	0.7305	0.1795	1	0.1382	0.8279	-0.6006	0.5225	-0.0273567	0.9642	-0.7773	0.2723	0.708438	0.2397
MVLG_05119	12.38	14.07	1529.49	1573.16	699.91	1020.27	246.08	742.35	69.78	66.71	137.38	811.11	1557.25	1892.21	7.028	1.678e-96	6.143	1.325e-67	5.272	4.731e-50	2.848	3.419e-14	7.034	5.07e-44	-0.846439	0.01541	-1.754	2.376e-08	-4.23367	2.426e-35	-0.0332714	1	-0.8781	0.1937	-3.31	2.489e-21	0.829	0.1994	-2.43383	4.355e-12	1.688	0.0004605	-4.17212	2.472e-24
MVLG_04091	83.8	74.9	220.54	167.34	110.62	103.59	43.34	54.21	26.8	30.78	30.67	85.81	112.12	133.16	1.427	7.653e-08	0.5143	0.09881	-0.6756	0.03942	-1.548	1.63e-06	0.621	0.1775	-0.875644	0.01564	-2.097	6.566e-11	-3.02918	9.29e-20	-0.843387	0.1252	-1.198	0.02371	-2.081	4.391e-09	0.04818	1	-0.874903	0.03049	1.236	0.02462	-2.15265	1.817e-07
MVLG_02091	772.79	709.8	326	223.64	549.45	463.79	405.02	521.36	2503.71	1244.18	1731.63	1979.16	506.15	294.85	-1.285	1.547e-06	-0.4638	0.1238	-0.6244	0.04152	1.21	0.0004531	0.1972	0.6142	0.857305	0.01599	0.6665	0.06539	2.45185	1.195e-11	1.45072	0.001159	-0.1697	1	1.663	8.006e-06	0.6329	0.332	1.84707	8.532e-07	0.7969	0.1356	1.00077	0.03206
MVLG_00053	0.29	0.17	224.91	258.67	144.89	129.29	158.63	135.21	38.48	76.15	64.83	192.26	217.85	247.34	10.14	4.559e-114	9.261	2.013e-82	9.322	2.605e-87	7.883	1.313e-56	9.941	3.353e-48	-0.845322	0.01659	-0.8174	0.01561	-2.32737	7.558e-13	-0.229821	0.8772	0.04825	1	-1.408	7.457e-05	0.633	0.3866	-1.44529	4.259e-05	0.5837	0.3742	-2.06322	1.908e-07
MVLG_05804	1.95	2.35	23.99	9.07	2.01	1.93	0.68	0	0.65	0.63	1.24	0	6.34	20.45	3.076	1.296e-07	-0.04632	1	-2.114	0.09926	-1.394	0.01947	2.532	0.005055	-2.9636	0.01699	-4.842	4.935e-06	-4.50627	7.278e-11	-0.578358	0.7422	NA	NA	NA	NA	NA	NA	NA	NA	NA	NA	-3.88182	0.0002388
MVLG_04921	242.18	139.54	358.21	370.84	752.22	597.96	622.18	636.29	407.41	254.87	236.81	360.35	208.54	221.72	1.1	5.863e-05	1.925	2.608e-11	1.8	1.25e-09	0.6194	0.08539	0.4976	0.2589	0.859103	0.0171	0.7037	0.05151	-0.529704	0.1761	-0.642113	0.4588	-0.1348	1	-1.32	0.0002259	-1.476	0.003696	-1.16945	0.001391	-1.341	0.007598	0.125035	0.9195
MVLG_04190	0	0	287.49	248.47	138.31	159.08	41.75	88.85	5.3	4.42	16.23	176.73	208.53	233.96	15.22	1.711e-105	14.31	2.811e-74	13.08	6.76e-57	10.38	7.817e-28	14.5	1.513e-42	-0.86187	0.01711	-2.168	1.983e-11	-5.20274	4.066e-47	-0.435471	0.6194	-1.275	0.01291	-4.265	6.756e-31	0.4443	0.6463	-2.99337	5.864e-16	1.698	0.0006494	-4.75006	5.581e-28
MVLG_00125	0	0	69.26	65.02	11.33	21.16	5.54	17.68	8.12	10.21	8.63	54.09	199.25	166.14	10.92	8.922e-15	NA	NA	NA	NA	8.343	1.21e-11	12.08	6.83e-20	-2.01134	0.01762	-2.864	0.000236	-2.95179	1.326e-08	1.42702	0.05961	NA	NA	-0.8343	0.4441	3.434	1.599e-05	-0.005302	0.923	4.231	1.525e-08	-4.34225	4.879e-18
MVLG_02774	320.42	347.3	57.91	67.56	111.58	132.29	158.03	167.12	215.84	239.28	192.64	176.13	122.56	100.49	-2.276	5.933e-16	-1.366	3.623e-06	-0.9997	0.000917	-0.7477	0.02632	-1.348	0.0007824	0.942661	0.01782	1.276	0.0002089	1.47093	9.032e-05	0.882371	0.1834	0.3537	0.9719	0.5998	0.166	-0.03411	1	0.257068	0.6234	-0.3904	0.6319	0.604817	0.2938
MVLG_04176	25.95	27.54	5.9	9.81	27.43	22.72	30.06	17.57	37.72	41.76	51.18	47.99	22.01	21.2	-1.628	0.0001732	-0.01608	1	-0.07095	0.8202	0.6037	0.1038	-0.04714	0.9714	1.62876	0.01867	1.55	0.006695	2.17327	7.628e-06	1.51409	0.05792	-0.07194	1	0.6027	0.2663	-0.08566	1	0.697293	0.1365	0.006293	0.9598	0.644836	0.4792
MVLG_06488	1.53	1.32	16.93	9.31	43.27	35.62	50.48	45.53	23.29	22.85	15.36	38.1	14.28	11.64	3.336	5.637e-07	4.861	4.927e-21	5.12	6.236e-35	3.755	1.258e-18	3.507	1.32e-05	1.54492	0.01867	1.777	0.0008426	0.358458	0.6245	0.12512	1	0.2453	1	-1.129	0.02345	-1.393	0.2115	-1.36118	0.001252	-1.64	0.0575	0.245739	0.9763
MVLG_04320	99	106.19	914.92	888.92	469.59	498.86	191.36	316.78	49.7	38.58	54.78	199.73	186.1	385.46	3.302	5.903e-31	2.362	7.887e-14	1.37	2.5e-05	-0.971	0.006322	1.73	0.0001163	-0.903699	0.01868	-1.93	1.131e-08	-4.32699	1.499e-33	-1.61234	0.0003836	-0.9981	0.1597	-3.348	1.202e-18	-0.6912	0.3316	-2.34842	1.105e-09	0.2893	0.8413	-2.68131	4.233e-09
MVLG_01897	0.45	0.49	592.41	797.67	355.16	437.52	292.59	346.6	48.91	107.78	118.62	433.39	869.22	888.82	10.65	4.525e-122	9.789	6.291e-90	9.431	9.109e-87	7.537	2.947e-52	10.73	2.626e-54	-0.822078	0.01897	-1.216	0.0001236	-3.17926	3.099e-22	0.0521304	1	-0.371	0.9491	-2.281	2.194e-11	0.8899	0.1462	-1.90314	3.53e-08	1.255	0.0121	-3.19721	3.994e-16
MVLG_04235	40.05	27.51	210.57	207.71	100.53	130.08	33.05	92.1	72.44	53.18	72.03	155.36	195.27	169.91	2.777	5.023e-24	1.871	5.995e-10	0.8881	0.004759	0.8435	0.01741	2.479	1.675e-09	-0.86832	0.01936	-1.888	1.371e-08	-1.98513	2.321e-09	-0.335309	0.7652	-0.9853	0.149	-1.043	0.006508	0.5505	0.5148	-0.0617121	0.8937	1.507	0.003869	-1.62059	0.000113
MVLG_00609	150.23	139.94	181.78	169.57	423.02	291.12	301.85	359.62	202.55	213.47	160.01	344.12	97.28	118.72	0.4401	0.1733	1.394	6.237e-06	1.267	4.059e-05	0.4565	0.2241	0.09901	0.7222	0.985768	0.01948	0.828	0.03502	-0.0390275	0.9408	-0.389376	0.9272	-0.1357	1	-0.9558	0.01582	-1.339	0.06797	-0.808368	0.04454	-1.204	0.08596	0.342234	0.8166
MVLG_03971	39.07	35.82	56.68	62.67	111.96	101.58	161.3	133	294.45	198.32	201.68	178.62	78.83	77.38	0.8067	0.002758	1.586	2.037e-08	2.004	9.229e-12	2.45	3.358e-12	1.518	0.0001039	0.812724	0.02113	1.198	0.0001389	1.59243	8.008e-06	0.674191	0.3035	0.4056	0.8923	0.8496	0.03132	-0.1084	0.978	0.459112	0.3105	-0.5163	0.4426	0.93188	0.04382
MVLG_02500	57.28	55.71	137.29	125.91	68.03	78.64	44.74	65.8	59.61	53.97	75.03	86.98	136.79	149.06	1.354	3.664e-07	0.4608	0.144	-0.008874	1	0.01168	0.9903	1.271	0.001967	-0.856844	0.02133	-1.36	3.911e-05	-1.39534	3.656e-05	-0.121557	0.9531	-0.4786	0.8611	-0.4646	0.2846	0.7503	0.2997	0.0202598	0.9992	1.218	0.02256	-1.24105	0.004274
MVLG_07182	140.7	137.76	2544.61	2471.48	1336.41	1537.3	434.2	956.65	90.89	145.71	173.82	579.15	867.95	1113.71	4.339	1.76e-51	3.494	8.002e-31	2.398	5.398e-15	0.1254	0.8001	2.98	1.073e-12	-0.807329	0.0214	-1.938	3.22e-10	-4.27182	2.555e-36	-1.39684	0.0005681	-1.103	0.03214	-3.389	1.235e-22	-0.5752	0.3663	-2.28358	5.878e-11	0.5135	0.5179	-2.83995	1.769e-12
MVLG_00183	171.5	161.33	43.57	38.51	99.92	68.6	213.55	168.5	96.83	136.39	140.22	12.08	61.32	67.03	-1.879	2.256e-10	-0.9086	0.00361	0.2454	0.4634	-0.5144	0.1393	-1.429	9.777e-05	1.00177	0.02143	2.126	3.452e-10	1.30748	0.0009323	0.409677	0.8888	1.142	0.03175	0.376	0.4497	-0.5828	0.3618	-0.75386	0.05666	-1.725	5.416e-05	0.940434	0.02542
MVLG_01908	407.93	437.06	24.86	23.47	64.49	57.58	45.3	47.36	169.24	187.47	260.43	102.96	62.69	44.99	-3.984	4.781e-33	-2.706	9.201e-17	-3.146	2.056e-21	-1.096	0.0007909	-2.679	7.376e-10	1.30386	0.02146	0.8354	0.1479	2.83247	2.418e-11	1.24994	0.1026	-0.4495	0.9737	1.594	0.0001517	-0.02954	1	2.0536	4.884e-07	0.4174	0.6099	1.58372	0.002187
MVLG_01245	162.28	174.09	5.76	1.15	23	10.35	43.59	25.46	74.7	66.01	62.88	112.9	13.79	8.82	-5.462	2.282e-37	-3.267	9.578e-19	-2.191	6.324e-12	-1.418	1.254e-05	-3	3.101e-07	2.18031	0.02182	3.24	8.094e-08	3.98915	2.389e-13	2.35019	0.009011	1.055	0.4077	1.835	0.0001204	0.228	0.6893	0.798678	0.07103	-0.8009	0.7735	1.53701	0.08616
MVLG_02843	24	24.3	64.23	60.8	39.85	26.26	27.58	42.31	37.18	34.67	42.4	65.01	71.7	99.35	1.506	6.994e-08	0.5198	0.133	0.5418	0.09345	0.5152	0.1644	1.824	1.076e-05	-0.951769	0.02206	-0.9627	0.01183	-1.04452	0.003899	0.277373	0.8888	0.01729	1	-0.01931	0.9782	1.246	0.03724	-0.0317454	0.9409	1.215	0.03025	-1.2927	0.003643
MVLG_04096	0.45	0.42	2843.52	2173.18	1452.75	1269.82	144.59	631.15	52.93	12.96	74.36	2621.27	753.84	1727.07	12.35	2.2e-94	11.45	5.519e-64	9.491	1.334e-34	6.765	3.669e-19	11.77	9.897e-37	-0.867695	0.02262	-2.868	4.399e-16	-5.68866	2.043e-49	-0.550217	0.5495	-1.955	9.818e-05	-4.742	2.305e-32	0.3442	0.727	-2.8065	7.847e-11	2.247	1.365e-05	-5.10567	2.844e-28
MVLG_03566	10.76	9.97	14.9	7.61	23.03	27.63	28.84	25.24	31.75	40.14	40.62	30.93	14.39	22.46	0.2514	0.5582	1.373	7.385e-05	1.424	1.176e-05	1.725	9.125e-07	0.9924	0.03389	1.15418	0.02281	1.174	0.007815	1.41865	0.0008349	0.691769	0.4617	0.03607	1	0.3311	0.5493	-0.4341	0.8137	0.307175	0.5701	-0.4663	0.6925	0.725642	0.2982
MVLG_01770	85.67	147.58	23.61	20.42	33.26	59.56	49.34	72.63	89.95	53.02	94.22	73.85	41.61	57.83	-2.283	1.167e-13	-1.245	8.745e-05	-0.9277	0.003614	-0.7149	0.03617	-1.064	0.01683	1.07072	0.02317	1.353	0.0005359	1.51969	0.0001704	1.1668	0.06858	0.3047	0.9831	0.5172	0.2784	0.1218	0.9556	0.217391	0.7098	-0.1923	0.8842	0.354242	0.6655
MVLG_03892	114.5	52.11	2.15	0.85	5.66	7.15	11.18	4.93	67.33	107.18	70.28	10.32	5.28	4.71	-5.646	1.348e-42	-3.602	5.748e-23	-3.228	1.967e-22	-0.1499	0.6933	-3.85	1.213e-14	2.03928	0.02322	2.399	0.000384	5.4341	2.267e-26	1.71144	0.133	0.3523	1	3.427	1.548e-14	-0.3019	0.982	3.10189	2.71e-14	-0.6253	0.6947	3.69819	5.111e-12
MVLG_06582	15.49	10.76	79.9	120.16	180.07	188.99	265.58	192.82	139.7	113.81	170.8	151.15	99.63	65.77	3.078	6.765e-26	3.906	2.125e-35	4.176	6.156e-38	3.318	2.191e-19	2.944	8.491e-12	0.860812	0.02323	1.097	0.001173	0.184869	0.7045	-0.177312	0.9804	0.2558	1	-0.6029	0.1377	-1.01	0.1134	-0.845812	0.02835	-1.265	0.01643	0.370316	0.6322
MVLG_00382	56.3	38.03	191.99	182.25	120.2	93.42	91.24	81.92	121.84	139.96	145.96	161.73	187.39	280.64	2.134	1.79e-15	1.261	2.34e-05	0.9237	0.002677	1.408	4.689e-05	2.281	1.639e-08	-0.838395	0.02332	-1.206	0.0002278	-0.781088	0.03016	0.110036	0.9963	-0.347	0.9727	0.1297	0.8271	0.9644	0.1125	0.490201	0.2901	1.311	0.009554	-0.858082	0.06589
MVLG_07349	265.68	300.32	35.28	49.2	168.05	91.76	139.77	146.08	49.73	102.69	88.72	0	108.11	27.63	-2.588	5.516e-11	-1.028	0.006079	-0.8853	0.01106	-1.597	7.112e-07	-1.664	1.2e-05	1.57667	0.02363	1.693	0.001725	0.926965	0.1316	0.869308	0.86	0.1326	1	-0.5913	0.2519	-0.6983	0.293	-0.716058	0.1133	-0.8381	0.1047	0.0869076	0.621
MVLG_04292	117.83	121.66	403.79	553.88	738.54	1009.41	1274.76	974.95	534.73	645.88	553.04	500.17	597.42	514.74	2.158	1.316e-13	3.008	1.382e-22	3.35	1.234e-26	2.442	6.797e-12	2.52	3.255e-09	0.884887	0.02412	1.192	0.0004914	0.225213	0.6417	0.32012	0.8774	0.3257	0.9762	-0.5863	0.1548	-0.5494	0.437	-0.900185	0.01887	-0.8764	0.09217	-0.0575823	0.9908
MVLG_01000	13.81	9.97	6.89	7.46	16.31	16.32	28.63	24.45	32.75	39.12	37.78	16.52	18.2	16.77	-0.5867	0.118	0.5403	0.1343	1.201	0.0001396	1.478	2.195e-05	0.623	0.21	1.15635	0.02421	1.786	5.693e-06	2.00746	1.075e-06	1.16202	0.1414	0.647	0.6705	0.9187	0.03851	0.02372	1	0.284066	0.5922	-0.6212	0.3809	0.865953	0.09938
MVLG_01848	0.19	0.13	246.79	210.72	116.13	141.85	77.62	95.5	14.69	20.09	21.59	62.03	155.21	202.49	10.56	1.166e-100	9.686	2.03e-70	9.055	5.9e-65	6.747	4.751e-39	9.934	2.197e-38	-0.83626	0.0243	-1.503	3.295e-06	-3.88514	6.127e-30	-0.647605	0.2659	-0.6436	0.5727	-2.975	5.32e-17	0.1999	0.9505	-2.32467	7.183e-11	0.8347	0.2039	-3.19884	8.306e-15
MVLG_06876	33.88	31.98	33.09	59.1	94.24	189.38	205.21	152.93	137	116.72	93.25	0	71.65	96	0.6322	0.3313	2.267	1.252e-06	2.612	1.529e-12	2.03	3.893e-08	1.671	0.02612	1.64982	0.02464	1.968	0.0006501	1.33926	0.01858	0.976784	0.7677	0.3238	1	-0.2588	0.7046	-0.6576	0.3874	-0.563666	0.2782	-0.9711	0.1188	0.379954	0.376
MVLG_07122	331.7	305.35	259.04	129.49	40.16	72.17	32.97	92.37	178.69	136.24	125	0	169.49	173.75	-0.5168	0.1697	-2.335	3.235e-06	-2.441	7.528e-08	-0.8019	0.02362	-0.4534	0.1379	-1.75919	0.02464	-1.907	0.003304	-0.335655	0.5756	0.0227261	0.9612	-0.1086	1	1.514	0.01997	1.784	0.1276	1.61522	0.00705	1.864	0.08101	-0.317274	1
MVLG_01073	286.31	154.59	34.41	77.35	113.15	118.69	87.65	142.2	68.27	95.88	66.74	77.53	89.68	44.94	-1.82	1.66e-09	-0.8197	0.01047	-0.8983	0.005448	-1.555	1.317e-06	-1.502	0.0003485	1.02994	0.02516	0.918	0.0253	0.200435	0.7209	0.274647	0.9273	-0.08491	1	-0.7584	0.07136	-0.7394	0.3589	-0.670158	0.1106	-0.6694	0.3381	-0.0423636	0.9914
MVLG_07157	191.85	156.96	510.2	633.22	903.64	1092.83	1316.59	864.43	767.51	732.03	553.1	447.94	627.39	509.83	1.868	3.031e-12	2.629	1.345e-19	2.714	1.425e-19	1.948	2.059e-08	1.798	8.916e-06	0.795737	0.02589	0.8465	0.01208	0.0245643	0.9753	-0.108834	0.9665	0.0705	1	-0.6983	0.07137	-0.8876	0.1016	-0.755718	0.05257	-0.9605	0.04829	0.169394	0.7936
MVLG_04024	9.9	7.02	60.46	76.17	39.49	31.9	27.58	17.13	66.73	45.21	45.96	60.25	74.14	93.81	3.158	3.238e-26	2.158	9.949e-10	1.486	1.989e-05	2.493	4.027e-12	3.325	3.697e-14	-0.965175	0.02658	-1.666	2.536e-06	-0.717372	0.06459	0.126532	0.9997	-0.686	0.6074	0.3205	0.5478	1.107	0.103	1.03182	0.01491	1.806	0.0005463	-0.811538	0.1209
MVLG_04722	0	0.04	1370.76	1349.24	719	890.32	341.82	632.23	39.14	34.39	108.44	713.79	1174.49	1335.36	15.58	4.514e-148	14.77	8.979e-114	14.02	3.312e-101	10.96	5.032e-53	15.11	2.006e-61	-0.765553	0.02666	-1.569	1.745e-07	-4.76021	6.662e-44	-0.39318	0.6546	-0.78	0.2436	-3.917	9.184e-30	0.392	0.6711	-3.13179	8.425e-20	1.165	0.01952	-4.34739	1.141e-26
MVLG_02043	340.75	461.62	387.25	345.5	247.35	197.96	175.13	165.44	102.51	124.71	98.43	290.69	238.38	297.18	0.03192	0.9252	-0.7962	0.006583	-1.169	8.761e-05	-2.04	1.288e-10	-0.5067	0.2254	-0.794634	0.02728	-1.199	0.0001634	-2.12787	6.373e-11	-0.578874	0.4324	-0.3837	0.9352	-1.262	0.0004506	0.2367	0.8571	-0.864525	0.02492	0.6192	0.3286	-1.52101	0.0002258
MVLG_03646	182.78	411.83	41.83	54.99	79.95	109.95	106.98	120.05	215.47	205.37	241.32	174.31	134.11	170.92	-2.5	7.215e-18	-1.572	1.704e-07	-1.369	6.518e-06	-0.56	0.1062	-0.8469	0.0378	0.959599	0.02772	1.127	0.002514	1.88428	7.24e-07	1.6027	0.001349	0.1889	1	0.9962	0.01496	0.6647	0.3936	0.816363	0.05156	0.4712	0.5234	0.301368	0.6601
MVLG_01248	48.79	45.67	78.06	195.71	278.57	290.72	461.2	561.31	165.3	195.34	89.03	55.67	79.94	62.82	1.684	1.81e-06	2.711	1.314e-15	3.528	1.26e-27	1.777	6.211e-07	0.9121	0.1357	1.05576	0.02808	1.839	4.234e-07	0.0289793	0.9753	-0.813837	0.3652	0.8049	0.3387	-0.9572	0.02159	-1.854	0.001824	-1.75182	1.097e-06	-2.666	1.657e-07	0.884454	0.1323
MVLG_05566	35.42	14.3	98.99	130.38	245.25	257.25	142.68	102.85	122.2	185.57	187.85	0	217.2	175.13	2.393	1.448e-09	3.484	3.374e-21	2.471	1.822e-11	2.913	5.002e-15	3.188	3.021e-10	1.12157	0.02917	0.0816	0.9978	0.457194	0.3727	0.755029	0.7272	-1.026	0.1841	-0.5952	0.1882	-0.3601	0.4979	0.450858	0.3878	0.6737	0.6338	-0.254461	1
MVLG_01163	153.83	197.59	156.71	166.58	92.47	84.99	54.84	68.48	77.48	57.52	50.21	81	152.22	186.12	0.01259	0.9754	-0.9099	0.003828	-1.49	2.558e-06	-1.639	4.021e-07	-0.1025	0.7537	-0.888384	0.02982	-1.501	1.478e-05	-1.70435	6.903e-07	-0.156518	0.9126	-0.5881	0.7504	-0.744	0.07972	0.7431	0.3678	-0.145842	0.8007	1.321	0.01799	-1.50606	0.0007139
MVLG_00559	148.6	114.32	60.25	76.48	33.74	38.98	16.94	31.83	61.37	32.26	53.44	95.48	90.73	139.27	-0.8001	0.004338	-1.764	1.613e-08	-2.447	7.401e-14	-1.576	1.038e-06	-0.1679	0.7081	-0.92917	0.02988	-1.648	7.126e-06	-0.826128	0.02824	0.591316	0.497	-0.6861	0.7095	0.1759	0.763	1.537	0.004711	0.861329	0.06116	2.198	1.342e-05	-1.39171	0.00137
MVLG_03425	50.96	41.5	25.41	21.15	11.82	9.57	5.91	9.89	19.86	12.4	18.3	41.96	29.21	27.23	-0.8517	0.005369	-2.034	1.47e-08	-2.6	7.16e-13	-1.618	7.482e-07	-0.54	0.2877	-1.14294	0.0303	-1.743	9.452e-05	-0.816431	0.0499	0.267657	0.8862	-0.5675	0.9762	0.4029	0.5085	1.433	0.02869	0.970236	0.06338	1.977	0.0009534	-1.07186	0.03024
MVLG_02995	74.76	78.17	8.13	6.8	27.31	17.49	67.05	32.04	65.95	68.5	76.4	24.79	18.12	19.49	-3.232	5.532e-17	-1.685	3.136e-06	-0.5457	0.08171	-0.2319	0.5357	-1.888	0.0001054	1.56321	0.03075	2.677	1.808e-08	2.9442	3.717e-10	1.28012	0.245	1.119	0.1938	1.438	0.001612	-0.2589	0.9505	0.339283	0.4902	-1.359	0.04888	1.66224	0.002562
MVLG_03611	53.94	63.12	3.37	3.37	8.96	21.6	19.44	38.95	20.66	18.11	14.13	54.93	2.88	10.32	-3.981	2.942e-17	-1.841	4.959e-06	-1.052	0.004388	-1.856	2.398e-08	-2.61	0.0002831	2.12655	0.03075	2.89	3.691e-06	2.06528	0.002325	NA	NA	0.7784	0.733	-0.03677	0.9777	-0.8048	0.9639	-0.825634	0.07467	-1.61	0.2255	0.724437	0.8442
MVLG_04415	102.09	109.06	876.6	1079.14	523.92	543.03	225.7	425.41	276.28	184.49	204.45	247.07	394.19	606.92	3.37	1.614e-31	2.466	1.922e-14	1.689	2.177e-07	1.247	0.0004145	2.504	1.212e-08	-0.868808	0.03075	-1.682	1.312e-06	-2.17515	1.681e-10	-0.906207	0.08321	-0.7826	0.483	-1.234	0.001652	-0.02596	0.9794	-0.448554	0.3471	0.7352	0.3605	-1.22679	0.01221
MVLG_06059	2.71	2.98	10.94	13.61	37.59	16.44	43.62	28.81	14.5	21.16	18.54	5.72	14.16	8.92	2.241	4.837e-09	3.3	7.565e-20	3.716	2.047e-28	2.541	4.21e-12	2.065	0.000127	1.08565	0.03075	1.473	0.0002356	0.239074	0.6968	-0.218464	0.9324	0.4042	0.9672	-0.7773	0.07369	-1.29	0.03754	-1.16446	0.002454	-1.689	0.001385	0.493486	0.424
MVLG_06175	0	0	9900.92	10778.5	6513.7	5926.4	1094.78	3511.24	138.85	117.93	400.09	1683.63	3593.68	4694.91	17.89	6.96e-163	17.1	4.915e-127	15.69	1.083e-101	12.64	2.86e-51	16.14	6.921e-58	-0.745249	0.03075	-2.23	4.281e-14	-5.61596	6.061e-57	-1.4692	0.0001551	-1.46	0.0004329	-4.795	1.391e-41	-0.7091	0.2059	-3.32927	6.287e-22	0.7431	0.2174	-4.12454	2.124e-24
MVLG_06939	5037.17	2992.81	411.86	311.52	283.7	113.73	142.64	116.46	103.22	102.86	93.32	176.09	407.27	484.07	-3.29	3.937e-32	-4.245	2.822e-40	-4.835	1.024e-46	-5.257	6.194e-53	-3.072	1.169e-17	-0.919746	0.03075	-1.536	1.451e-05	-2.02117	6.226e-09	0.182899	0.9934	-0.5973	0.7668	-1.028	0.01589	1.113	0.1071	-0.412121	0.423	1.715	0.001357	-2.1603	3.839e-07
MVLG_07115	7.38	9.04	180.58	161.03	407.27	230.15	304.04	247.51	79.71	113.83	137.25	91.06	192.07	216.19	4.519	1.508e-44	5.343	1.177e-53	5.125	1.336e-48	3.71	4.125e-22	4.643	9.245e-23	0.854782	0.03075	0.6081	0.1283	-0.865695	0.02016	0.0849352	1	-0.2277	1	-1.65	3.557e-06	-0.76	0.1916	-1.40814	9.226e-05	-0.5311	0.3479	-0.912268	0.07749
MVLG_03879	57.99	46.02	119.5	134.8	66.68	49.14	75.35	49.43	92.7	73.09	56.6	34.77	70.48	87.31	1.451	5.338e-06	0.254	0.5841	0.3926	0.3344	0.5039	0.178	0.7421	0.1986	-1.15843	0.03115	-1.052	0.01401	-1.0015	0.01373	-0.748588	0.3488	0.1225	1	0.2334	0.7297	0.424	0.8794	0.133897	0.8142	0.3169	0.8382	-0.214527	0.9052
MVLG_02662	29.74	32.21	78.45	96.61	145.37	169.95	181.06	148	130.5	151.11	156.06	114.16	115.55	100.82	1.634	6.317e-09	2.433	2.726e-16	2.448	7.29e-16	2.113	1.531e-09	1.901	4.619e-06	0.832522	0.03192	0.8132	0.024	0.421191	0.3235	0.224546	0.9232	0.0002491	1	-0.3379	0.4533	-0.5878	0.4322	-0.326499	0.4863	-0.5893	0.3532	0.223846	0.76
MVLG_04439	79.55	66.11	8.55	3.79	29	10.97	42.47	39.91	56.59	70.07	62.2	46.31	21.28	7.32	-3.418	4.395e-18	-1.798	7.399e-07	-0.7749	0.01921	-0.3088	0.3955	-1.927	0.0002584	1.63283	0.03192	2.631	9.845e-08	3.05162	2.324e-10	1.42487	0.144	1.012	0.3001	1.473	0.00136	-0.1793	1	0.470112	0.3539	-1.19	0.1626	1.61581	0.009299
MVLG_04757	2.45	2.5	196.47	170.87	91.01	120.36	38.97	78.51	8.44	5.92	18.22	132.55	136.71	160.51	6.344	6.865e-83	5.502	2.341e-56	4.576	5.388e-39	2.017	6.296e-08	5.937	5.573e-34	-0.804132	0.03192	-1.765	4.516e-08	-4.37856	3.014e-36	-0.444632	0.623	-0.9324	0.1597	-3.498	1.79e-22	0.3793	0.7136	-2.5667	1.237e-12	1.293	0.01392	-3.91469	5.8e-21
MVLG_06141	20.88	18.73	61.67	65.89	33.06	32.02	31.69	30.27	70.99	38.76	55.43	113.58	58.85	60.44	1.827	3.753e-10	0.7989	0.02777	0.6862	0.04474	1.327	0.0001477	1.868	1.043e-05	-0.991881	0.03192	-1.138	0.003025	-0.54899	0.181	-0.0042589	1	-0.1245	1	0.5158	0.3042	1.016	0.1275	0.654663	0.1592	1.143	0.04369	-0.542045	0.3105
MVLG_00112	170.63	157.59	13.96	8.12	40.33	33.39	39.94	35.99	47.57	56.35	46.81	25	39.76	47.61	-3.738	1.942e-20	-2.064	2.651e-08	-2.039	2.818e-09	-1.731	9.08e-08	-1.794	5.67e-05	1.68516	0.03249	1.686	0.01052	1.9483	0.0004017	1.87231	0.03915	0.01143	1	0.3121	0.6553	0.2061	0.9907	0.313964	0.62	0.1981	0.9568	0.0748333	0.9225
MVLG_03837	134.12	194.9	445.61	447.56	281.61	251.93	161.55	176.34	78.49	164.69	61.96	294.4	287.73	346.57	1.568	1.859e-09	0.7665	0.008832	0.06869	0.8453	-0.8072	0.01549	0.9891	0.01514	-0.76791	0.03249	-1.498	1.164e-06	-2.43976	4.648e-14	-0.619893	0.3537	-0.7085	0.3992	-1.599	4e-06	0.1672	0.9262	-0.879509	0.02153	0.872	0.1197	-1.78018	9.099e-06
MVLG_03853	71.38	60.48	10.3	5.93	35.43	18.92	47.61	40.4	52.31	52.87	57.34	36.37	22.41	6.69	-2.871	2.247e-11	-1.201	0.002478	-0.515	0.145	-0.3502	0.3399	-1.787	0.001299	1.68061	0.03249	2.342	2.154e-05	2.4648	2.473e-06	1.02065	0.5381	0.6718	0.8309	0.8343	0.1154	-0.6378	0.7359	0.174862	0.7873	-1.308	0.115	1.44547	0.03229
MVLG_05045	127.07	140.67	279.18	266.91	159.34	149.33	82.53	126.48	54.99	69.07	84.13	79.17	262.59	287.75	1.162	2.146e-05	0.2689	0.4311	-0.3442	0.3477	-1.031	0.001785	0.9312	0.04229	-0.857568	0.03249	-1.504	1.334e-05	-2.24936	2.164e-11	-0.26942	0.7719	-0.6192	0.7031	-1.318	0.000548	0.5965	0.54	-0.695716	0.09867	1.2	0.04258	-1.93742	5.297e-06
MVLG_00134	79.26	73.07	491.74	554.96	223.42	372.58	120.3	239.45	28	46.22	62.83	434.49	370.93	513.35	2.93	2.052e-26	2.084	3.934e-12	1.272	3.84e-05	-0.7296	0.0302	2.672	8.304e-11	-0.808489	0.03303	-1.657	4.154e-07	-3.71943	4.736e-28	-0.29746	0.8249	-0.8203	0.299	-2.835	9.172e-16	0.5313	0.5206	-2.01674	1.724e-08	1.333	0.01074	-3.40033	6.437e-17
MVLG_00635	12.59	3.11	189.94	147.7	90.47	106.72	30.91	74.71	6.58	5.35	14.3	290.47	231.96	228.8	4.588	1.206e-54	3.763	2.16e-33	2.786	1.327e-18	0.0679	0.9126	5.046	2.912e-29	-0.785541	0.03303	-1.795	1.737e-08	-4.57222	2.776e-39	0.427799	0.6587	-0.9804	0.1069	-3.711	2.825e-25	1.237	0.01686	-2.73209	2.375e-14	2.198	2.078e-06	-4.98514	1.2e-31
MVLG_00790	18.37	11.29	86.3	67.79	38.17	46.68	21.52	33.06	14.15	16.24	15.65	58.11	59.04	53.53	2.522	2.532e-19	1.612	4.616e-07	0.8916	0.006454	-0.06763	0.8592	2.015	1.875e-06	-0.871169	0.03303	-1.625	3.508e-06	-2.64524	7.423e-15	-0.544508	0.5383	-0.7269	0.5443	-1.701	7.513e-06	0.3457	0.7757	-0.971726	0.01698	1.056	0.08354	-2.07545	1.09e-06
MVLG_06028	460.05	325.73	746.1	913.59	1402.73	1444.97	1494.76	1309.33	1398.5	951.78	645.65	1233.55	719.45	563.44	1.241	2.676e-06	1.97	3.588e-12	1.915	7.399e-11	1.333	0.0001121	1.138	0.0043	0.763275	0.03305	0.6752	0.05558	0.0408759	0.9455	-0.141021	0.9804	-0.0674	1	-0.6524	0.09489	-0.8768	0.1395	-0.56963	0.1689	-0.8118	0.145	0.199287	0.8099
MVLG_04075	1.18	1.23	166.99	149.45	71.45	89.23	54.7	80.06	10.4	38.66	32.67	102.28	277.09	212.52	7.165	1.619e-59	6.139	3.954e-29	5.802	2.856e-36	4.565	4.352e-24	7.661	6.948e-32	-0.988012	0.03312	-1.361	0.0005944	-2.66826	2.392e-14	0.462545	0.7677	-0.3456	0.9957	-1.607	0.000101	1.458	0.01906	-1.26339	0.001446	1.785	0.001122	-3.10124	1.388e-13
MVLG_05716	0	0	136.17	161.7	38.95	83.18	25.44	78.16	4.8	4.45	1.16	0	12.46	0	12.09	7.898e-32	10.77	4.612e-11	10.32	3.593e-14	6.899	1.968e-05	NA	NA	-1.26882	0.03312	-1.801	0.0005845	-5.5603	2.01e-29	-4.09683	2.081e-08	-0.4908	1	-4.213	7.547e-10	-2.809	0.003562	-3.74322	3.754e-10	-2.404	0.004146	-1.33315	0.9051
MVLG_02256	81.51	70.88	99.36	86.87	136.07	186.67	184.83	223.72	130.37	147.99	139.39	118.4	98.75	120.07	0.4265	0.1358	1.177	4.547e-05	1.463	6.791e-07	0.7337	0.03884	0.6154	0.1573	0.788007	0.03446	1.04	0.001645	0.252176	0.5798	0.149665	0.9646	0.2729	0.9819	-0.4617	0.272	-0.6149	0.3862	-0.725362	0.06489	-0.8931	0.09056	0.128272	0.88
MVLG_00980	516.49	446.54	785.14	872.33	469.55	502.02	191.13	246.92	678.67	778.51	612.07	696.06	739.64	742.95	0.9392	0.0004239	0.1192	0.7274	-1.077	0.0005375	0.5118	0.1616	0.7646	0.07082	-0.784808	0.03475	-2.014	1.638e-10	-0.484351	0.2061	-0.213438	0.8888	-1.205	0.0165	0.3735	0.4232	0.5896	0.4469	1.58783	4.387e-05	1.786	0.0002008	-0.237305	0.7442
MVLG_02441	39.36	34.1	30.38	32.24	16.37	15.32	8.4	8.65	33.65	34.97	38.19	44.26	35.1	25.19	-0.09282	0.7949	-1.134	0.001097	-2.082	2.208e-09	-0.1857	0.6233	-0.11	0.8952	-1.00466	0.03486	-1.984	5.234e-07	-0.148828	0.7505	-0.0607154	1	-0.9562	0.4125	0.9305	0.04349	0.9656	0.2036	1.89966	9.14e-06	1.919	0.0005865	-0.0722316	0.9173
MVLG_02534	287.29	367.96	39.66	41.9	90.3	86.54	106.02	63.9	90.42	80.37	88.25	0	53.49	67.45	-2.867	6.949e-20	-1.806	1.241e-08	-1.864	1.527e-09	-1.994	4.789e-10	-2.445	3.083e-11	1.09013	0.03486	1.003	0.03149	0.819114	0.07193	0.376526	1	-0.07524	1	-0.2032	0.7139	-0.7021	0.2157	-0.106969	0.8792	-0.6165	0.2094	0.478456	0.1951
MVLG_01789	31.7	38.6	101.94	206.66	245.7	306.36	223.75	292.51	87.86	91.13	155.54	159.54	79.04	106.78	2.271	1.983e-15	3.065	9.282e-24	2.918	5.316e-21	1.592	5.446e-06	1.656	0.0001171	0.825015	0.0352	0.6427	0.09431	-0.738629	0.05115	-0.664392	0.497	-0.1589	1	-1.488	3.202e-05	-1.461	0.00861	-1.32253	0.0002503	-1.307	0.01673	-0.0680676	0.9031
MVLG_00566	8.6	11.28	8.17	28.04	82.1	95.44	94.77	81.18	1475.93	2192.68	968.34	0	11.35	83.32	0.96	0.5562	3.286	2.199e-06	3.305	1.358e-10	7.576	4.057e-59	2.408	0.03878	2.28554	0.03625	2.299	0.01205	6.5488	3.359e-32	NA	NA	0.003892	1	4.264	7.555e-20	-0.9121	0.5917	4.278	6.133e-22	-0.9125	0.4245	5.16181	1.437e-21
MVLG_01409	79.2	85.95	305.29	534.95	554.57	852.27	710.68	744.39	350.05	383.24	449.49	320.72	301.36	208.74	2.484	6.819e-21	3.187	6.058e-28	3.178	1.079e-25	2.128	1.056e-09	1.78	7.29e-06	0.736979	0.03698	0.6904	0.04483	-0.416339	0.2818	-0.745628	0.2293	-0.02416	1	-1.076	0.002599	-1.458	0.001225	-1.04335	0.004223	-1.44	0.001084	0.356454	0.5571
MVLG_04673	97.81	88.8	129.25	116.99	79.24	63.55	59.24	72.41	57.12	53.76	44.54	36.97	134.56	117.27	0.537	0.05515	-0.311	0.346	-0.4721	0.1489	-0.9903	0.002801	0.2873	0.6754	-0.813297	0.03698	-1.006	0.003837	-1.58098	3.029e-06	-0.287153	0.7444	-0.1693	1	-0.6962	0.09002	0.5341	0.6136	-0.515704	0.2389	0.696	0.346	-1.24704	0.006231
MVLG_01573	91.61	80.86	183.29	147.16	97.92	97.56	58.03	75.21	139.42	83.37	113.74	207.99	172.48	239.05	1.073	5.028e-05	0.2623	0.4127	-0.3411	0.307	0.219	0.5756	1.319	0.0008949	-0.774491	0.03707	-1.41	9.642e-06	-0.901292	0.01064	0.208149	0.915	-0.6125	0.6018	-0.05553	0.9207	1.004	0.07796	0.5683	0.2057	1.609	0.0007232	-1.08717	0.01127
MVLG_03137	53.83	49.61	655.18	710.75	360.88	457.9	142.68	241.36	53.43	85.54	97.25	453	479.65	660.71	3.864	2.477e-43	3.08	1.759e-25	1.932	1.302e-10	0.5202	0.1629	3.468	6.2e-17	-0.747455	0.03725	-1.93	2.17e-10	-3.40345	4.254e-25	-0.434319	0.6095	-1.158	0.0156	-2.58	2.594e-14	0.3333	0.7489	-1.4171	6.982e-05	1.481	0.001993	-2.93878	5.984e-14
MVLG_00931	0.17	0.08	101.42	109.05	56.84	56.54	34.28	53.43	7.7	8.85	14.77	29.18	122.09	126.23	10.09	1.947e-74	9.171	1.678e-44	8.763	1.879e-47	6.573	3.749e-30	9.997	1.822e-32	-0.879768	0.03727	-1.326	0.0003085	-3.59266	2.503e-24	-0.102566	0.9292	-0.4179	0.9697	-2.638	7.617e-12	0.784	0.3722	-2.22054	4.456e-09	1.183	0.0575	-3.45174	8.424e-16
MVLG_00282	522.84	341.57	236.24	158.66	117.93	93.29	31	38.48	26.18	25.61	19.18	26.79	68.65	75.94	-0.9654	0.000607	-1.933	1.16e-09	-3.603	1.264e-24	-4.215	2.225e-35	-2.481	5.174e-10	-0.929271	0.03749	-2.626	9.974e-12	-3.3042	6.159e-20	-1.54944	0.00149	-1.671	0.006995	-2.301	1.881e-08	-0.6064	0.4518	-0.619119	0.2498	1.051	0.2236	-1.71201	0.001692
MVLG_01732	0	0.14	10664.4	16753	7970.46	8734.87	1463.76	4823.83	139.73	149.28	520.14	1908.91	5134.82	5252.5	17.18	4.084e-182	16.42	2.922e-144	15	1.25e-117	11.53	3.429e-59	15.45	1.455e-64	-0.720098	0.03749	-2.188	7.957e-14	-5.79546	4.622e-60	-1.65156	1.242e-05	-1.444	0.0004329	-4.997	1.008e-44	-0.915	0.06832	-3.54741	5.127e-25	0.5233	0.4308	-4.12334	1.029e-24
MVLG_02019	21.38	16.24	56.49	56.6	30.37	29.45	23.07	36.44	17.26	16.19	20.98	23.81	29.73	37.78	1.73	2.152e-09	0.7545	0.03554	0.6651	0.04452	-0.1726	0.6538	0.8739	0.07753	-0.939422	0.03749	-1.064	0.007265	-1.95816	2.801e-08	-0.896283	0.185	-0.09502	1	-0.9443	0.03168	0.05933	1	-0.848418	0.04299	0.1372	0.9765	-1.03454	0.05256
MVLG_05707	109.29	110.75	107.13	136.4	66.73	69.3	35.26	85.08	52.63	32.97	45.51	56.71	77.08	100.51	0.2849	0.3419	-0.6099	0.06281	-0.88	0.008641	-1.468	6.908e-06	-0.2997	0.4706	-0.8609	0.03906	-1.167	0.001788	-1.8056	1.708e-07	-0.626435	0.3725	-0.2726	1	-0.8715	0.03799	0.2485	0.9064	-0.600835	0.1693	0.4953	0.5989	-1.14534	0.01852
MVLG_05229	135.14	126.58	380.78	444.02	209.39	282.33	166.56	234.58	154.15	194.36	209.62	818.45	472.97	636.12	1.796	7.259e-12	1.005	0.0005405	0.6566	0.03098	0.3976	0.2903	2.33	3.726e-09	-0.754348	0.0393	-1.138	0.0004166	-1.45639	1.113e-05	0.497017	0.5438	-0.3603	0.961	-0.6263	0.1154	1.277	0.0114	-0.258754	0.5902	1.628	0.000469	-1.92631	7.868e-07
MVLG_00578	10.31	7.47	15.43	12.32	40.71	19.76	68.48	32.27	23.84	35.81	34.08	7.16	17.08	12.94	0.7836	0.03916	1.833	1.589e-07	2.57	6.096e-16	1.705	1.402e-06	0.7996	0.1867	1.078	0.0394	1.788	4.681e-06	0.862981	0.06013	-0.0247124	1	0.7222	0.549	-0.1465	0.799	-1.088	0.101	-0.8489	0.03499	-1.799	0.0004526	0.920047	0.08334
MVLG_03069	18.77	14.6	65.34	104.24	52.56	33.74	37.48	34.17	15.5	23.12	20.95	0	101.08	85.36	2.493	6.384e-16	1.451	0.0001715	1.162	0.00114	0.2184	0.6377	2.417	3.716e-07	-1.00784	0.0394	-1.329	0.0008583	-2.33854	1.051e-10	-0.114786	0.8277	-0.2992	1	-1.254	0.005228	0.8973	0.4518	-0.942827	0.03247	1.196	0.1265	-2.17508	6.623e-06
MVLG_03471	720.5	1324.34	14.03	19.2	44.4	54.33	85.16	189.53	428.72	166.45	377.14	651.72	190.18	148.61	-5.811	8.965e-57	-4.286	5.595e-35	-2.901	1.417e-19	-1.718	7.92e-08	-1.905	9.688e-06	1.53949	0.0394	2.891	6.559e-10	4.0462	3.303e-18	3.82524	7.696e-12	1.376	0.03175	2.56	3.283e-09	2.33	1.646e-05	1.17943	0.004899	0.9384	0.1014	0.165934	0.9537
MVLG_05602	0.06	0.08	51.56	50.41	27.38	28.84	31.83	34.38	23.73	26.66	20.63	41.63	84.76	96.29	9.519	4.958e-74	8.605	3.525e-44	8.791	6.161e-58	8.145	2.124e-52	10.09	1.493e-38	-0.877411	0.04018	-0.7269	0.06543	-1.44418	3.632e-05	0.547697	0.6111	0.1727	1	-0.4938	0.2844	1.436	0.01181	-0.65649	0.1237	1.258	0.0211	-1.95048	2.649e-06
MVLG_02392	1.49	1.3	6.99	11.24	44.82	12.57	33.75	33.92	4.86	8.11	7.22	0	9.48	10.62	2.838	0.0001442	4.409	4.242e-15	4.63	7.951e-28	2.283	1.964e-07	2.876	0.006531	1.58301	0.04031	1.779	0.001868	-0.621642	0.3493	-0.0054674	1	0.2133	1	-2.148	3.038e-05	-1.563	0.04035	-2.3545	2.439e-08	-1.788	0.005329	-0.601151	0.8001
MVLG_01483	321.47	255.21	453.09	577.02	780.07	960.24	1111.78	778.9	855.48	861.98	737.13	678.8	612.53	521.13	0.9905	0.000222	1.704	1.937e-09	1.778	1.479e-09	1.465	2.157e-05	1.175	0.003483	0.747925	0.04065	0.7879	0.02134	0.417828	0.3086	0.14574	0.9665	0.05996	1	-0.2565	0.5786	-0.5799	0.4061	-0.304228	0.5173	-0.6423	0.27	0.300408	0.6392
MVLG_05423	156.63	109.92	87.94	88.77	42.29	59.52	20.26	51.2	292.57	257.61	265.64	182.75	134.69	90.69	-0.4506	0.1096	-1.291	1.426e-05	-1.896	1.212e-09	0.8815	0.01173	0.01424	0.9705	-0.803225	0.0411	-1.444	2.311e-05	1.27906	0.0004166	0.42746	0.6545	-0.6085	0.7031	2.155	1.456e-08	1.257	0.018	2.76284	1.814e-12	1.842	0.0001369	0.869301	0.06607
MVLG_04126	194.35	187.49	332.34	329.54	651.36	480.67	737.43	655.99	73.15	124.68	154.01	245.74	496.93	320.56	0.9333	0.0004694	1.641	6.146e-09	1.911	7.399e-11	-0.7889	0.01807	1.038	0.01171	0.740451	0.04114	0.9799	0.002502	-1.78154	5.881e-08	0.0655385	1	0.2596	0.9892	-2.449	2.924e-13	-0.662	0.2697	-2.69763	1.518e-15	-0.9229	0.05368	-1.81182	6.574e-06
MVLG_01636	592.21	652.67	31.83	57.9	9.98	15.8	15.6	15.68	539.66	108.2	344.19	342.13	174.29	54.09	-3.649	1.539e-29	-5.487	1.813e-38	-5.256	5.101e-41	-0.9704	0.003623	-1.916	1.31e-05	-1.77992	0.04123	-1.595	0.01057	2.63702	1.492e-10	1.67603	0.004145	0.2143	1	4.51	3.009e-18	3.477	3.246e-07	4.30822	6.941e-20	3.28	2.239e-08	0.942481	0.1125
MVLG_04950	37.84	30.23	84.27	69.16	45.05	43.25	31.43	33.05	10.56	15.44	15.65	35.96	101.34	94.42	1.31	1.359e-06	0.4573	0.1588	-0.04512	0.9222	-1.407	1.386e-05	1.385	0.0009437	-0.8162	0.04197	-1.35	6.726e-05	-2.77502	1.446e-16	0.0380685	1	-0.5125	0.8254	-1.885	2.38e-07	0.8642	0.2336	-1.36378	0.0002662	1.371	0.01084	-2.77339	8.556e-12
MVLG_05105	11.94	12.25	47.79	27.4	23.71	15.79	35.17	34.37	26.46	21.76	28.98	43.3	34.16	45.73	1.767	2.396e-09	0.775	0.03913	1.556	9.084e-07	0.9406	0.008243	1.809	2.77e-05	-0.953331	0.04197	-0.2052	0.739	-0.875176	0.02333	0.0012182	1	0.7696	0.5198	0.1519	0.8239	0.9762	0.175	-0.606614	0.1682	0.2072	0.8429	-0.859351	0.09371
MVLG_06570	110.77	145.57	277.45	288.77	450.2	531.06	638.91	576.63	464.03	363.07	273.07	227.02	263.78	206.96	1.283	3.269e-06	2.031	3.399e-12	2.3	1.676e-14	1.455	2.566e-05	1.02	0.0188	0.782314	0.04197	1.017	0.002505	0.120291	0.811	-0.305813	0.8249	0.2547	0.995	-0.591	0.146	-1.07	0.04579	-0.832031	0.03125	-1.328	0.004593	0.457104	0.4136
MVLG_01742	36.03	41.85	20.75	18.98	10.99	4.26	5.68	4.35	15.81	14.34	10.45	30.23	30.87	29.52	-0.8379	0.01616	-2.29	1.06e-07	-2.875	1.084e-12	-1.668	5.914e-07	-0.2675	0.6274	-1.40598	0.0423	-2.02	0.0001511	-0.886881	0.05881	0.522581	0.7444	-0.5903	0.9799	0.6047	0.3999	1.945	0.009302	1.21893	0.0291	2.547	0.0001489	-1.38218	0.008663
MVLG_03936	197.66	193.02	6.67	4.44	13.31	22.83	15.2	56.11	63.87	43.11	34.47	54.39	15.23	6.81	-4.993	3.028e-37	-3.339	2.801e-20	-2.544	1.101e-13	-2.185	1.266e-11	-3.612	1.081e-11	1.66358	0.0423	2.424	8.288e-06	2.75559	1.182e-07	1.30643	0.239	0.7938	0.5727	1.136	0.02696	-0.3278	1	0.32146	0.6353	-1.169	0.241	1.42605	0.06876
MVLG_06341	122.28	69.22	843.68	1008.26	491.73	632.67	201.47	384.55	201.76	132.99	178.44	931.1	729.56	587.74	3.43	7.578e-36	2.666	4.502e-20	1.671	1.917e-08	0.7477	0.03521	3.029	8.82e-14	-0.728314	0.04299	-1.757	7.588e-09	-2.73431	3.627e-17	-0.436261	0.6413	-1.003	0.05955	-1.932	1.463e-08	0.3168	0.7489	-0.920551	0.01573	1.309	0.00717	-2.27507	5.682e-09
MVLG_05589	189.95	199.67	49.4	78.99	153.88	107.99	294.26	196.5	443.41	227.21	149.78	324.61	92.31	73.4	-1.456	3.983e-06	-0.491	0.1506	0.4072	0.2193	0.4207	0.2545	-0.6304	0.3436	0.993069	0.04309	1.86	3.763e-07	1.82827	3.869e-06	0.769214	0.2826	0.8841	0.2451	0.9008	0.03527	-0.1811	1	0.037908	0.9467	-1.054	0.175	1.03302	0.1117
MVLG_01572	123.9	125.08	118.1	112.95	119.57	288.13	156.59	289.52	76.02	58.45	58.92	74.93	57.55	105.46	0.0356	0.9266	0.8312	0.006915	0.88	0.003829	-1.04	0.001905	-0.5083	0.2768	0.833933	0.04351	0.8456	0.02142	-1.12782	0.002611	-0.587272	0.5558	0.03612	1	-1.888	1.74e-07	-1.398	0.01006	-1.92032	6.757e-08	-1.447	0.004285	-0.517632	0.4329
MVLG_01275	45.68	41.38	94.68	106.58	62.23	47.49	51.1	54.93	63.55	45.38	42.17	39.92	33.58	18.36	1.351	2.277e-06	0.4126	0.257	0.3223	0.3571	0.08543	0.8393	-0.518	0.3626	-0.904268	0.0443	-1.027	0.007103	-1.31848	0.0002736	-1.90795	0.000526	-0.09939	1	-0.3414	0.5133	-0.9852	0.2394	-0.229547	0.6752	-0.8911	0.227	0.619305	0.3826
MVLG_03638	27.57	28.95	2776.19	3882.42	1918	2104.81	990.58	1944.28	317.02	322.34	352.97	1749.91	1927.22	2370.56	7.036	5.23e-100	6.276	6.253e-73	5.789	1.048e-60	3.672	3.689e-22	6.438	1.459e-39	-0.726841	0.04431	-1.247	7.241e-05	-3.42153	3.234e-25	-0.638986	0.3048	-0.4955	0.774	-2.62	1.174e-14	0.1052	0.975	-2.1165	6.847e-10	0.5923	0.3678	-2.74942	2.389e-12
MVLG_03259	116.95	111.88	223.07	217.7	119.51	144.51	72.4	103.37	96.88	89.22	107.4	207.84	144.32	130.85	1.082	4.398e-05	0.2947	0.3536	-0.3506	0.2961	-0.3616	0.3167	0.4881	0.2546	-0.750977	0.04555	-1.43	7.877e-06	-1.49713	7.045e-06	-0.633573	0.4044	-0.6551	0.544	-0.6723	0.09167	0.1438	0.9253	-0.0095666	0.9773	0.79	0.1777	-0.845969	0.06589
MVLG_04810	27.04	20.24	425.29	433.99	281.46	251.29	279.77	243.76	119.79	174.08	189.44	252.55	383.51	337.23	4.325	4.479e-52	3.575	5.51e-33	3.508	1.001e-29	2.638	1.041e-13	3.863	3.629e-20	-0.715036	0.04565	-0.8141	0.01353	-1.74543	7.579e-08	-0.498662	0.497	-0.07865	1	-0.9566	0.008872	0.2339	0.8629	-0.866683	0.02193	0.3108	0.6976	-1.21419	0.003561
MVLG_04940	66.52	60.62	224.99	179.37	118.24	124.57	72.15	122.14	106.94	59.93	98.65	209.5	136.3	218.7	1.804	7.454e-12	1.017	0.0005319	0.6431	0.03549	0.3217	0.3955	1.607	5.303e-05	-0.75044	0.04586	-1.157	0.0004163	-1.52919	4.376e-06	-0.234743	0.8888	-0.3819	0.9491	-0.7067	0.07443	0.5393	0.4794	-0.315691	0.5021	0.9118	0.1004	-1.27583	0.00246
MVLG_03474	91.14	90.96	57.95	45.89	26.17	23.86	13.46	19.55	32.64	15.91	24.71	53.49	61.85	60.37	-0.6709	0.0318	-1.782	7.582e-07	-2.488	7.033e-12	-2.054	5.188e-10	-0.4844	0.2872	-1.07193	0.04612	-1.811	5.536e-05	-1.43033	0.0003033	0.143937	0.9995	-0.7096	0.859	-0.2824	0.6809	1.231	0.1041	0.433006	0.4948	1.922	0.001811	-1.54232	0.001682
MVLG_05200	1624.97	2202.69	194.97	161.72	98.06	114.17	115.77	135.98	59.36	86	106.32	149.44	94.94	79.95	-3.298	1.225e-33	-4.095	5.936e-41	-3.898	2.642e-35	-4.64	5.901e-44	-4.199	2.775e-28	-0.760411	0.04654	-0.5978	0.1124	-1.3992	3.065e-05	-0.944469	0.1167	0.1842	1	-0.5637	0.1705	-0.1553	0.9579	-0.740061	0.06072	-0.3434	0.6977	-0.442146	0.4171
MVLG_02146	12.43	21.59	284.83	254.82	160.15	162.99	62.48	104.99	34.25	58.5	63.69	219.3	261.31	298.96	4.111	9.286e-46	3.318	7.858e-27	2.308	2.013e-13	1.515	1.774e-05	4.039	9.123e-21	-0.757483	0.04703	-1.802	1.922e-08	-2.6547	6.689e-16	-0.113217	0.9672	-1.018	0.08578	-1.823	2.141e-07	0.6618	0.3708	-0.802284	0.04299	1.665	0.0006688	-2.51109	2.453e-10
MVLG_06070	63.1	68.44	113.49	130.61	266.86	194.24	325.71	323.41	314.47	291.68	252.07	322.45	104.7	113.01	1.04	0.0008232	1.893	1.489e-09	2.367	1.417e-14	2.095	2.524e-09	1.215	0.004455	0.883609	0.04733	1.326	0.0001757	1.00043	0.01217	0.124992	0.9292	0.4634	0.8706	0.1862	0.7398	-0.7216	0.5073	-0.263443	0.5963	-1.182	0.07012	0.864872	0.1843
MVLG_00623	118.46	130.46	5.9	8.83	19.6	22.72	17.5	15.5	94.51	85.27	83.46	83.98	39.79	4.54	-3.94	5.126e-26	-2.472	2.607e-12	-2.864	1.09e-16	-0.6235	0.07144	-1.962	6.53e-05	1.48498	0.04745	1.068	0.1092	3.26079	2.745e-12	1.90812	0.004764	-0.404	0.9804	1.832	4.068e-05	0.4515	0.628	2.2522	1.075e-07	0.8617	0.217	1.33389	0.03075
MVLG_00165	59.89	48.24	25.9	26.1	14.29	13.5	10.51	15.34	27.66	23.61	25.27	11.49	28.16	33.65	-0.9182	0.001304	-1.88	5.76e-09	-2.066	1.911e-10	-1.243	0.0001389	-0.8932	0.01726	-0.92615	0.04748	-1.146	0.004024	-0.378104	0.3749	-0.0141922	1	-0.1912	1	0.6214	0.1962	0.9219	0.2632	0.816332	0.07497	1.097	0.09459	-0.324174	0.7346
MVLG_00785	28.44	25.52	94.76	94.59	135.02	184.28	150.97	180.37	106.4	99.05	113.06	104.81	102.17	95.97	1.948	8.403e-13	2.658	1.419e-19	2.656	1.619e-18	1.832	1.298e-07	1.96	1.511e-06	0.746715	0.04816	0.7107	0.04678	-0.169012	0.7048	-0.0270872	1	-0.01438	1	-0.8416	0.02641	-0.7515	0.2342	-0.817664	0.03384	-0.7427	0.1914	-0.116834	0.8956
MVLG_04016	204.47	179.83	386.96	449.09	760.91	713.3	811.22	930.51	784.59	620.49	515.94	543.07	510.25	406.56	1.29	7.012e-06	2.061	5.986e-12	2.284	4.796e-14	1.854	9.636e-08	1.589	0.0001642	0.80466	0.04829	0.9955	0.004554	0.512042	0.2184	0.258056	0.9064	0.2121	1	-0.2227	0.6507	-0.529	0.497	-0.42162	0.3501	-0.7448	0.199	0.282781	0.6655
MVLG_02243	459.45	501.96	1137.04	1385.49	2926.3	1408.56	2443.21	2265.52	791.38	1047.77	844.72	908.32	1194.99	983.14	1.55	4.911e-09	2.251	3.201e-15	2.39	8.411e-16	1.01	0.003748	1.386	0.0006635	0.728969	0.04855	0.8393	0.01236	-0.599041	0.1085	-0.205413	0.8888	0.1304	1	-1.26	0.0003699	-0.9233	0.07923	-1.37413	9.453e-05	-1.053	0.02441	-0.354928	0.5885
MVLG_05902	128.1	147.74	301.32	243.65	145.18	165.26	132.14	199.23	120.99	93.73	91.06	116.19	108.67	122.65	1.126	4.432e-05	0.2642	0.444	0.3001	0.3578	-0.5052	0.1582	-0.1029	0.8487	-0.824523	0.04855	-0.823	0.03075	-1.68168	9.92e-07	-1.26989	0.01473	0.02671	1	-0.785	0.0612	-0.4265	0.6717	-0.80466	0.0474	-0.464	0.5264	-0.384799	0.586
MVLG_02889	124.15	140.75	57.67	55.93	32.19	31.26	37.69	36.38	28.14	33.82	38.64	37.53	63.16	50.28	-1.091	7.93e-05	-1.987	1.573e-10	-1.808	3.872e-09	-2.116	2.813e-11	-1.234	0.001138	-0.860979	0.04952	-0.715	0.0742	-1.08189	0.002685	-0.184303	0.9064	0.167	1	-0.1469	0.7906	0.6893	0.4322	-0.303335	0.5379	0.5202	0.5232	-0.862715	0.09361
MVLG_04079	161.05	161.16	50.23	43.84	16.35	29.38	17.68	22.19	53.76	33.51	50.58	10.71	52.5	28.56	-1.639	1.47e-08	-2.721	1.365e-15	-3.01	7.657e-19	-1.946	1.433e-09	-1.985	1.504e-07	-1.04313	0.05001	-1.367	0.001222	-0.356523	0.4345	-0.384868	0.6455	-0.2989	1	0.7601	0.1281	0.6618	0.6519	1.06549	0.02172	0.9475	0.2997	0.0724724	0.826
MVLG_00386	11.1	16.47	14.32	9.11	38.52	32.25	41.61	60.75	35.34	20.6	29.46	22.31	7.51	8.08	-0.0971	0.9342	1.437	0.00196	1.89	1.529e-07	0.9373	0.01146	-0.5395	0.7238	1.54854	0.05111	1.972	0.000413	0.982908	0.1079	NA	NA	0.4446	0.9762	-0.5113	0.4168	-1.998	0.09252	-0.954916	0.03621	-2.471	0.004296	1.48902	0.1428
MVLG_00624	1231.03	1000.86	1526.39	2136.02	2975.53	3046.56	2131.22	1898.05	1637.37	727.78	539.52	1503.02	595.09	650.83	0.8809	0.0009123	1.559	3.019e-08	0.9586	0.001241	-0.126	0.755	-0.2591	0.6563	0.711067	0.0512	0.07763	0.9006	-1.05285	0.002363	-1.18164	0.02062	-0.6126	0.5356	-1.695	7.071e-07	-1.861	4.134e-05	-1.0653	0.003852	-1.25	0.01253	0.13499	0.9133
MVLG_01813	10.32	8.16	52.74	43	27.09	22.2	25.13	22.28	19.2	16	21.24	9.55	50.46	57.27	2.514	5.296e-16	1.496	0.0001391	1.41	5.91e-05	0.9037	0.01331	2.47	6.622e-08	-0.980248	0.0512	-1.098	0.007103	-1.66332	7.38e-06	-0.0816511	0.9432	-0.098	1	-0.6079	0.2316	0.9068	0.3681	-0.496152	0.3218	1.006	0.1716	-1.53924	0.001996
MVLG_04278	55.47	41.05	332.57	294.51	170.15	202.7	77.99	138.29	62.18	75.57	91.07	310.42	438.22	602.25	2.848	3.543e-25	2.05	8.299e-12	1.194	0.0001198	0.5876	0.111	3.387	4.251e-16	-0.760827	0.0512	-1.651	4.215e-07	-2.31659	2.2e-12	0.501326	0.6002	-0.863	0.2425	-1.481	4.249e-05	1.278	0.01686	-0.616104	0.1421	2.125	6.589e-06	-2.78593	1.711e-12
MVLG_04323	138.85	131.83	2984.93	3688.55	2091.91	1968.04	1288.03	1735.89	2220.84	1502.66	1680.09	4969.34	2050.95	2197.27	4.787	1.616e-59	4.035	8.939e-39	3.597	4.493e-30	3.919	2.564e-25	4.624	5.397e-26	-0.717961	0.0512	-1.189	0.0001801	-0.919147	0.008448	-0.200775	0.9292	-0.4484	0.859	-0.1299	0.8043	0.5438	0.4553	0.331174	0.5022	0.9864	0.05867	-0.699465	0.1353
MVLG_04480	0.3	0.15	23.62	13.17	49.02	37.09	54.42	37.34	62.89	126.68	70.77	16.14	13.39	10	6.44	1.084e-13	7.602	2.867e-23	7.696	6.007e-39	8.491	4.354e-56	5.831	3.589e-05	1.19	0.05177	1.255	0.01318	1.97388	7.375e-06	-0.626702	0.8312	0.07684	1	0.8481	0.07593	-1.796	0.02427	0.789345	0.07653	-1.867	0.00856	2.63255	5.524e-06
MVLG_02612	50.27	60.81	40.32	34.94	20.4	19.1	10.58	21.36	53.83	60.26	55.87	39.93	26.54	43.93	-0.4328	0.1598	-1.419	2.706e-05	-1.85	7.642e-08	-0.1143	0.77	-0.5697	0.2359	-0.949956	0.05178	-1.417	0.000728	0.263259	0.5859	-0.182033	0.9775	-0.4321	0.9819	1.287	0.0031	0.7901	0.3494	1.7133	6.089e-05	1.193	0.06529	0.462538	0.4966
MVLG_06325	0.04	0.24	669.58	938.24	403.93	584.28	289.71	439.39	30.92	76.98	119.23	390.88	650.32	507.33	12.53	6.111e-133	11.79	1.209e-101	11.3	6.122e-95	8.934	3.344e-57	11.85	4.417e-52	-0.707643	0.05178	-1.236	7.654e-05	-3.67528	9.931e-29	-0.694415	0.24	-0.5048	0.7504	-2.889	1.268e-17	0.03139	1	-2.38022	2.768e-12	0.528	0.4369	-2.95089	4.842e-14
MVLG_03752	80.95	166.39	33.17	33.31	67.3	68.19	117.31	152.48	95.36	51.49	55.74	179.65	33.84	30.31	-1.772	3.049e-08	-0.799	0.01707	0.1468	0.6627	-1.018	0.002543	-1.272	0.03731	1.00257	0.05181	1.915	3.49e-07	0.706446	0.1197	0.437953	0.574	0.9341	0.1959	-0.2294	0.6837	-0.5134	0.9186	-1.15302	0.00273	-1.446	0.05904	0.224464	1
MVLG_04949	62.24	88.22	32.29	17.93	63.83	31.01	52.95	56.94	19.66	24.54	24.89	48.57	27.82	28.37	-1.461	5.856e-07	-0.6171	0.0502	-0.4304	0.1881	-1.846	7.864e-09	-1.219	0.006991	0.875302	0.05229	1.034	0.005932	-0.43885	0.3084	0.195859	0.915	0.1796	1	-1.245	0.001221	-0.652	0.4991	-1.41312	0.0001113	-0.8315	0.2391	-0.629862	0.2372
MVLG_04111	48.76	39.2	65.38	65.14	37.05	37.36	15.78	25.42	10.39	12.52	16.63	39.05	72.25	77.55	0.7093	0.01248	-0.157	0.6797	-1.102	0.001245	-1.846	1.076e-08	0.7137	0.1307	-0.83055	0.05244	-1.809	5.426e-07	-2.61261	2.57e-14	-0.0342607	0.9984	-0.9489	0.2837	-1.708	9.063e-06	0.808	0.3019	-0.759597	0.07916	1.736	0.001421	-2.54475	1.115e-09
MVLG_06702	229.99	252.15	195.31	144.85	105.31	99.76	76.21	109.73	178.39	77.25	122.95	159.24	118.73	114.31	-0.3721	0.1874	-1.157	8.174e-05	-1.347	8.287e-06	-1.099	0.0007997	-0.8744	0.03207	-0.748443	0.05308	-0.9704	0.004776	-0.769742	0.03467	-0.541918	0.5335	-0.1984	1	0.04871	0.9419	0.231	0.8573	0.258846	0.6249	0.4221	0.5574	-0.215082	0.7542
MVLG_04021	179.02	147.89	102.71	108.91	44.37	60.89	30.86	65.5	110.94	77.83	90.88	103.22	119.23	91.82	-0.473	0.1349	-1.526	1.994e-05	-1.801	4.37e-07	-0.8589	0.01168	-0.449	0.3275	-1.01506	0.05386	-1.328	0.003814	-0.437781	0.326	-0.0178587	1	-0.277	1	0.6513	0.2151	1.01	0.2175	0.921119	0.06561	1.254	0.06797	-0.390954	0.5982
MVLG_06941	1157.78	1348.11	8.29	1.83	4.88	25.98	7.56	7.73	1.63	3.36	5.39	112.06	15.88	12.78	-7.818	8.977e-93	-6.237	1.64e-65	-7.333	1.67e-76	-8.461	1.001e-100	-5.648	6.435e-32	1.59556	0.05386	0.4811	0.739	-0.700592	0.3157	2.0837	0.002395	-1.105	0.5281	-2.25	3.139e-05	0.5389	0.4748	-1.13083	0.03862	1.653	0.007238	-2.88143	2.752e-08
MVLG_01719	1146.08	943.8	1390.83	2052.48	3051.75	2572.81	2764.71	2301.22	3572.88	1411.86	1479.05	1623.62	1324.75	1246.81	0.86	0.001896	1.575	5.054e-08	1.45	1.053e-06	1.395	5.256e-05	0.8311	0.05736	0.747589	0.05387	0.5899	0.1226	0.490816	0.2251	-0.0693897	0.9917	-0.1381	1	-0.1894	0.7046	-0.8009	0.1811	-0.0323477	0.9611	-0.6631	0.2476	0.586014	0.2448
MVLG_04144	157.86	147.55	36.79	3.94	0	7.48	0.88	6.17	58.68	90.8	87.12	0	37.07	72.38	-2.747	1.739e-14	-5.217	6.697e-23	-5.855	1.952e-28	-0.967	0.003419	-1.485	6.417e-05	-2.3559	0.05409	-3.019	0.004964	1.72514	0.0001995	1.20964	0.4448	NA	NA	4.221	1.077e-10	3.555	0.0007728	4.85904	1.127e-13	4.167	6.164e-06	0.530462	0.1882
MVLG_03148	16.31	18.33	33.79	25.16	79.26	35.44	71.8	45.06	32.04	34.84	40.67	65.16	35.95	19.03	0.8989	0.006774	1.782	4.388e-08	1.808	9.492e-09	0.9299	0.009504	0.9887	0.02766	0.912347	0.05411	0.9117	0.03058	-0.0233391	0.9637	0.0430872	0.9934	0.01504	1	-0.8665	0.03709	-0.8411	0.3737	-0.862323	0.03355	-0.8449	0.296	-0.0645687	0.8783
MVLG_03320	91.34	88.4	82.15	58.21	39.48	33.69	26.52	30.01	45.5	38.86	50.43	55.88	57.6	50.67	-0.2163	0.5171	-1.215	0.0005213	-1.643	1.417e-06	-1.101	0.0009108	-0.6031	0.1926	-0.960734	0.05416	-1.421	0.0004469	-0.936177	0.01618	-0.427688	0.7677	-0.4363	0.9762	0.09888	0.9048	0.5504	0.628	0.544302	0.3073	0.9799	0.1626	-0.485185	0.4752
MVLG_03240	1.13	1.65	475.65	575.01	254.54	386.2	171.96	257.11	32.03	72.27	103.98	500.71	500.34	769.91	8.687	1.341e-118	7.935	6.945e-89	7.296	1.549e-75	5.567	5.447e-38	8.828	2.575e-53	-0.715867	0.05472	-1.391	9.689e-06	-3.183	3.011e-22	0.103308	0.9934	-0.6511	0.5143	-2.389	2.474e-12	0.8396	0.1739	-1.73505	6.572e-07	1.481	0.001974	-3.25904	1.313e-16
MVLG_06897	4.77	5.38	11.53	14.95	74.87	22.36	30.14	21.63	28.64	33.36	14.02	0	39.51	25.14	1.531	0.05117	3.323	1.162e-08	2.478	1.726e-06	2.34	5.721e-09	2.865	0.0001013	1.79478	0.05478	0.9364	0.3635	0.744271	0.3655	1.2647	0.7044	-0.8504	0.7804	-1.005	0.08633	-0.5114	0.567	-0.12911	0.8925	0.3449	1	-0.50357	0.9139
MVLG_04171	84.72	113.26	17.79	4.93	3.94	1.27	1.8	3.11	14.8	13.59	5.78	12.05	3.4	7.6	-2.994	1.848e-17	-5.186	1.619e-25	-5.448	2.705e-31	-3.276	1.749e-22	-4.073	5.705e-12	-2.10112	0.05574	-2.406	0.004115	-0.33734	0.6632	-1.1061	0.6587	NA	NA	1.886	0.02564	NA	NA	2.16339	0.002492	NA	NA	0.805382	0.565
MVLG_01381	55.77	104.11	8.26	5.01	15.51	31.88	19.56	45.44	44.13	40.24	67.26	61.55	31.94	24.91	-3.459	1.773e-14	-1.665	3.932e-05	-1.388	0.000276	-0.7317	0.03286	-1.205	0.02986	1.79386	0.05578	2.042	0.001724	2.67119	2.118e-06	2.16272	0.009011	0.2711	1	0.9161	0.1059	0.3918	0.8004	0.629583	0.2937	0.08586	0.9953	0.474904	0.6661
MVLG_07131	1113.57	606.42	2380.03	2856.39	4118.72	4351.69	5159.65	4390.17	3471.11	3971.63	3785.01	2893.81	2441.97	2268.55	1.763	8.595e-12	2.403	1.559e-17	2.53	1.215e-17	2.035	4.648e-09	1.634	2.379e-05	0.675819	0.05707	0.7698	0.01911	0.215276	0.6276	-0.162007	0.939	0.1151	1	-0.3866	0.3595	-0.8152	0.137	-0.49032	0.2451	-0.9347	0.0523	0.408495	0.4615
MVLG_00304	49.14	33.11	28.77	23.36	11.14	15.71	8.5	14.14	47.7	33.03	37.89	30.49	27.85	36.44	-0.5159	0.09389	-1.521	9.446e-06	-1.886	4.101e-08	-0.2138	0.5752	-0.2956	0.5463	-0.965839	0.0579	-1.366	0.001291	0.25266	0.5999	0.179719	0.9679	-0.3697	1	1.291	0.003352	1.163	0.1022	1.66037	0.0001003	1.51	0.01205	0.0938918	0.9165
MVLG_02081	57.67	59.06	14.43	17.28	29.9	34.92	37.25	29.74	49.43	67.38	72.87	15.61	51.2	40.18	-1.728	5.359e-08	-0.7674	0.02188	-0.7341	0.02224	-0.02096	0.9474	-0.4473	0.2241	0.99141	0.0579	0.9936	0.0235	1.64882	4.813e-05	1.23599	0.09624	0.01895	1	0.7271	0.1112	0.2533	0.9441	0.721469	0.1031	0.2358	0.9063	0.452213	0.3461
MVLG_01078	28.4	34	115.78	104.33	47.44	77.96	31.91	64.64	32.09	38.33	44.99	70.8	100.14	128.77	1.95	2.369e-12	1.099	0.0006658	0.6188	0.05504	0.1916	0.6504	1.855	1.018e-05	-0.813364	0.05819	-1.331	0.000259	-1.8147	1.069e-07	-0.135912	0.9432	-0.4871	0.908	-0.9271	0.0228	0.6914	0.4063	-0.443745	0.3287	1.154	0.05494	-1.64577	0.0001449
MVLG_02169	53	51.44	41.92	22.85	16.62	15.22	19.76	16.83	39.47	17.11	28.54	25.36	30.36	32.54	-0.5551	0.07886	-1.635	6.864e-06	-1.463	1.207e-05	-1.055	0.001863	-0.6761	0.1344	-1.03923	0.05848	-0.9002	0.04572	-0.543093	0.2296	-0.161669	0.9661	0.158	1	0.5701	0.2879	0.8933	0.3302	0.428987	0.4106	0.7408	0.3709	-0.355659	0.6852
MVLG_05642	604.87	549.96	363.59	318.38	241.12	174.79	196.33	228.15	296.98	175.85	274.43	441.77	338.28	395.48	-0.6143	0.02521	-1.394	2.015e-06	-1.394	3.437e-06	-1.304	5.505e-05	-0.4795	0.259	-0.745238	0.05848	-0.7764	0.03036	-0.737749	0.04428	0.0962045	0.9918	-0.008951	1	0.07819	0.9003	0.8626	0.1724	0.100254	0.8768	0.868	0.1247	-0.814483	0.08228
MVLG_01590	2.82	2.34	27.47	39.03	39.41	101.38	60.04	95.12	49.41	75.91	42.43	0	29.07	30.21	3.829	1.027e-14	4.884	4.685e-29	4.92	9.255e-36	4.409	1.593e-26	3.576	1.418e-07	1.08514	0.05854	1.085	0.01871	0.514783	0.3336	-0.293144	0.7877	0.02468	1	-0.5046	0.3112	-1.366	0.01973	-0.529945	0.2424	-1.412	0.006241	0.845117	0.05195
MVLG_06683	104.58	110.9	56.39	55.41	25.75	20.37	30.51	27.13	56.13	54.33	76.83	110.84	63.56	71.51	-0.9953	0.0015	-2.141	8.693e-09	-1.971	1.003e-08	-0.9857	0.003136	-0.585	0.2841	-1.10653	0.05854	-0.9717	0.04486	-0.0436385	0.9408	0.362204	0.7762	0.1591	1	1.141	0.02473	1.495	0.02468	0.990234	0.03555	1.337	0.02541	-0.403936	0.4983
MVLG_02191	182.69	167.26	747.17	701.11	434.98	475.3	320.39	379.53	230.22	192.2	230.54	456.67	500.56	499.26	2.186	5.703e-17	1.466	1.883e-07	1.041	0.0004177	0.1766	0.6609	1.543	8.006e-05	-0.684518	0.05855	-1.141	0.0002426	-2.06166	1.629e-10	-0.681207	0.2617	-0.4355	0.8587	-1.304	0.0001974	0.02455	1	-0.85676	0.02401	0.4554	0.5113	-1.35369	0.0009644
MVLG_03178	228.05	188.31	88.82	82.29	57.14	48.55	40.2	50.89	49.61	53.51	51.76	48.4	84.24	71.7	-1.147	1.316e-05	-1.903	3.817e-11	-2.161	5.421e-13	-2.169	7.407e-12	-1.498	3.218e-05	-0.720916	0.06068	-1.01	0.002513	-1.07666	0.001775	-0.38836	0.6587	-0.2666	0.9938	-0.2836	0.5401	0.3468	0.7675	-0.0061325	0.985	0.6077	0.371	-0.652357	0.2086
MVLG_03343	28.98	19.15	124.24	131.41	223.16	215.2	426.88	333.08	392.55	1243.58	710.67	57.46	103.18	172.15	2.56	5.438e-19	3.282	1.719e-26	4.036	2.214e-36	4.96	5.776e-36	2.482	9.37e-09	0.755571	0.06068	1.478	4.115e-06	2.33223	1.812e-10	-0.116091	0.9432	0.7421	0.3387	1.651	1.206e-05	-0.8589	0.1246	0.919072	0.0213	-1.602	0.0001986	2.49944	1.664e-10
MVLG_04057	10.09	12.1	34.68	48.73	23.45	5.59	20.72	16.14	9.18	46.52	33.99	0	121.74	128.74	2.052	1.406e-06	0.4511	0.5662	0.8323	0.0965	1.529	5.972e-05	3.49	1.578e-12	-1.54964	0.06139	-1.211	0.03846	-0.591493	0.1936	1.39008	0.1164	0.3639	1	1.05	0.1481	2.943	6.43e-05	0.69389	0.301	2.595	3.914e-05	-1.95421	8.959e-05
MVLG_06974	11.92	8.89	51.05	32.94	16.64	10.59	14.27	11.86	10.85	6.84	8.14	0	37.47	32.82	2.102	8.648e-07	0.5051	0.5191	0.3323	0.6198	-0.3978	0.4126	1.84	0.006534	-1.54285	0.06139	-1.751	0.003194	-2.55478	2.569e-07	-0.29992	0.7307	-0.1831	1	-0.9189	0.3551	1.249	0.4689	-0.719106	0.4049	1.443	0.176	-2.19888	0.00222
MVLG_00297	201.42	200.33	732.71	915.4	488.94	537.39	305.97	452.01	165.02	158.49	186.46	617.91	587.12	545.92	2.181	1.259e-16	1.448	4.302e-07	0.9668	0.00125	-0.3074	0.3995	1.64	3.742e-05	-0.69862	0.06185	-1.213	0.0001384	-2.54419	4.856e-15	-0.580182	0.4141	-0.4912	0.7897	-1.772	2.825e-07	0.139	0.9441	-1.27138	0.0004295	0.6227	0.328	-1.93628	1.207e-06
MVLG_03188	6.28	6.54	51.11	39.08	24.21	27.21	20.9	26.03	31.6	29.49	25.25	24.54	42.36	61.48	2.944	4.715e-24	2.083	5.133e-10	1.887	5.859e-09	2.007	1.415e-08	2.938	1.036e-11	-0.823715	0.06185	-1.054	0.004964	-0.990237	0.006874	-0.0453193	0.992	-0.2063	1	-0.09433	0.8719	0.7908	0.3376	0.120067	0.8673	0.9874	0.1203	-0.906583	0.07693
MVLG_03586	48.23	30.95	46.3	50.73	27.02	22.57	8.45	28.19	98.52	76.54	87	146.56	66.27	59.96	0.4433	0.1699	-0.5861	0.1399	-1.235	0.002005	1.028	0.00332	1.04	0.013	-0.992137	0.06185	-1.679	0.000253	0.531976	0.2203	0.550419	0.5266	-0.6406	0.954	1.599	0.0002656	1.574	0.008673	2.22032	5.568e-07	2.163	0.0001388	-0.0230867	0.9256
MVLG_00174	1028.84	1183.94	1221.14	972.26	627.74	750.99	456.98	546.43	289.17	289.53	493.89	429.27	702.31	793.83	0.1207	0.6861	-0.595	0.04086	-1.1	0.0001901	-1.743	4.035e-08	-0.6637	0.08099	-0.677731	0.06205	-1.216	7.966e-05	-1.91613	2.91e-09	-0.823943	0.1082	-0.5174	0.7095	-1.163	0.001038	-0.127	0.9262	-0.636277	0.1146	0.3857	0.6064	-1.06438	0.01291
MVLG_01909	170.1	186.28	15.96	4.84	36.36	24.63	8.72	8.44	35.14	20.98	30.66	0	29.57	62.68	-3.952	5.602e-25	-2.469	7.952e-12	-4.326	7.223e-27	-2.73	1.115e-16	-1.988	1.414e-07	1.4987	0.06392	-0.3658	0.7919	1.17242	0.041	1.89643	0.04339	-1.85	0.04915	-0.2721	0.712	0.4157	0.9794	1.60762	0.003963	2.263	0.004897	-0.715333	0.5707
MVLG_04646	38.17	47.43	55.45	118.88	137.45	189.81	126.15	182.63	96.27	53.89	49.19	30.59	86.9	67.54	1.166	0.0005888	2.039	6.537e-10	1.888	4.209e-09	0.5631	0.1257	0.9809	0.07806	0.902957	0.06397	0.7165	0.113	-0.656647	0.1531	-0.229797	0.8826	-0.1613	1	-1.489	0.0002164	-1.121	0.06285	-1.31997	0.0008227	-0.9748	0.07534	-0.379294	0.7462
MVLG_01428	138.39	130.92	212.24	246.47	478.83	430.42	471.17	397.82	359.51	233.86	229.3	798.4	194.11	138.29	0.9201	0.01538	1.896	8.443e-08	1.862	1.628e-08	1.337	0.0001627	1.159	0.01438	1.00593	0.06633	0.9419	0.04483	0.365761	0.4723	0.188701	0.8902	-0.04827	1	-0.5732	0.2345	-0.7848	0.5365	-0.50642	0.3036	-0.7285	0.5116	0.173513	0.9912
MVLG_03228	223.23	174.78	410.46	497.54	711.49	766.03	791.16	719.51	702.35	575.48	458.2	662.94	461.89	362.53	1.339	3.938e-07	1.99	2.252e-12	1.98	1.744e-11	1.451	2.589e-05	1.347	0.0006805	0.685499	0.06724	0.6417	0.07191	0.0581022	0.9167	-0.0304944	1	-0.02298	1	-0.5558	0.1655	-0.6901	0.2985	-0.519189	0.2184	-0.6702	0.2555	0.110018	0.9133
MVLG_01494	15.7	23.02	68.81	59.63	37.36	35.27	50.55	46.28	56.02	57.37	47.93	70.16	50.31	48.31	1.856	1.272e-10	0.9772	0.00499	1.354	2.055e-05	1.333	0.0001412	1.514	0.0004395	-0.842667	0.06783	-0.4997	0.2482	-0.577382	0.1483	-0.387154	0.8288	0.3631	0.9799	0.338	0.5285	0.4786	0.6453	-0.0121465	0.9863	0.1173	0.9103	-0.173009	0.8105
MVLG_02519	388.52	419.76	95.34	121.14	188.95	202.11	263.31	279.42	358.73	244.97	290.6	319.98	119.2	119.73	-1.755	1.503e-09	-0.9512	0.002117	-0.5161	0.1045	-0.487	0.1686	-1.302	0.004792	0.835404	0.06783	1.237	0.0006582	1.21588	0.001814	0.402101	0.7039	0.4227	0.9121	0.4504	0.3399	-0.398	0.8143	0.0399508	0.9595	-0.8201	0.2825	0.804149	0.2045
MVLG_03977	303.1	376.72	217.11	149.53	139.98	73.77	102.05	93.81	85.08	157.42	135.97	172.99	337.74	519.88	-0.7503	0.007963	-1.604	2.669e-07	-1.742	2.243e-08	-1.467	4.588e-06	0.2739	0.658	-0.818937	0.06783	-0.9864	0.008346	-0.775442	0.03801	0.984133	0.1211	-0.1466	1	0.1172	0.8649	1.815	0.0005511	0.276435	0.6216	1.962	6.974e-05	-1.71917	3.819e-05
MVLG_01686	143.62	123.24	303.69	292.63	193.28	186.45	141.01	187.14	219.29	151.8	176.47	296.86	256.94	272.42	1.296	5.856e-07	0.5887	0.04429	0.3368	0.2851	0.2863	0.4542	1.084	0.006024	-0.672204	0.06824	-0.9556	0.00305	-1.05947	0.001866	-0.248218	0.8676	-0.2617	0.9892	-0.316	0.4785	0.446	0.5777	-0.0412022	0.9409	0.7028	0.2278	-0.787064	0.08396
MVLG_00406	1.5	1.33	34.38	5.11	10.19	3.27	10.45	0	2.85	8.58	1.45	0	3.25	5.83	3.935	2.193e-13	2.309	0.01513	2.304	0.002045	1.721	0.0001289	1.634	0.263	-1.56493	0.06928	-1.605	0.003337	-2.27931	5.718e-06	-2.28687	0.01403	-0.02811	1	-0.6243	0.5259	NA	NA	-0.560318	0.7167	NA	NA	0.056409	0.9065
MVLG_01202	12.71	8.12	57.67	63.35	109.04	92.22	176.63	111.91	76.23	122.99	117.25	34.53	70.83	67.93	2.682	4.109e-22	3.353	9.217e-29	3.829	5.682e-34	3.206	1.325e-18	2.64	2.148e-10	0.704478	0.06944	1.148	0.000387	0.463071	0.2587	-0.0796432	0.9732	0.4631	0.8295	-0.1684	0.7308	-0.7725	0.1698	-0.619138	0.128	-1.236	0.005341	0.585546	0.2141
MVLG_00404	0.78	0.18	44.81	6.07	12.91	6.22	5.52	7.65	3.18	18.97	0.38	0	2.07	3.7	5.848	2.552e-20	4.368	1.431e-06	3.72	7.709e-07	4.098	5.224e-18	2.52	0.2572	-1.42599	0.06948	-2.103	0.0006501	-1.82723	4.162e-05	-3.27223	0.0001906	-0.6474	1	-0.3215	0.6808	NA	NA	0.334797	0.866	NA	NA	1.52588	0.08711
MVLG_05191	123.98	133.51	104.78	83.26	30.79	63.79	27.76	40.43	9.77	18.06	12.03	47.66	55.57	59.87	-0.3071	0.3539	-1.335	0.0002524	-1.924	9.199e-08	-3.229	2.856e-22	-1.018	0.0255	-0.988146	0.07028	-1.611	0.0002529	-2.98335	4.7e-15	-0.751616	0.4075	-0.5964	0.9398	-1.922	5.14e-05	0.2499	0.9371	-1.32643	0.00308	0.8285	0.401	-2.2118	1.523e-05
MVLG_06251	254.74	263.26	300.48	237.54	201.67	129.32	112.72	126.81	132.99	67.81	88.48	189.6	197.92	248.47	0.1963	0.5155	-0.5745	0.06598	-1.07	0.0005766	-1.541	2.048e-06	-0.1412	0.7493	-0.73646	0.07028	-1.262	0.0001884	-1.78235	1.453e-07	-0.376837	0.7238	-0.5031	0.8399	-0.976	0.01351	0.3764	0.7393	-0.4582	0.3265	0.8753	0.1572	-1.37701	0.001822
MVLG_00637	16.96	18.43	44.83	44.26	27.57	22.96	21.59	16.65	45.07	21.71	26.16	29.97	53.19	38.91	1.464	3.37e-07	0.585	0.09908	0.1613	0.6896	0.6195	0.08617	1.376	0.001669	-0.84375	0.0705	-1.298	0.0003771	-0.890973	0.02007	-0.128977	0.9502	-0.4367	0.9491	0.0244	0.9819	0.727	0.4126	0.482045	0.3185	1.169	0.0523	-0.725692	0.2042
MVLG_04166	40.59	51.15	2162.95	2493.71	1715.76	1220.99	616.51	952.68	285.91	261.72	398.88	1129.5	1503.11	1876.64	5.821	1.157e-76	5.099	1.154e-53	4.185	1.717e-36	2.937	1.213e-15	5.388	3.863e-31	-0.689591	0.07052	-1.635	1.644e-07	-2.93832	3.772e-19	-0.473394	0.522	-0.9211	0.1277	-2.177	2.588e-10	0.229	0.8942	-1.24616	0.0007005	1.142	0.03224	-2.43147	9.327e-10
MVLG_00771	2.66	6.61	23.14	20.77	7.07	15.33	12.25	25.88	7.24	5.51	7.72	0	17.77	20.06	2.356	1.37e-13	1.348	0.001057	1.996	2.806e-09	0.3754	0.3474	1.908	0.0003171	-0.970781	0.07075	-0.3638	0.5697	-2.03367	6.625e-08	-0.491001	0.3814	0.639	0.7504	-0.9885	0.04723	0.4847	0.9212	-1.63446	3.384e-05	-0.1805	0.6046	-1.49753	0.01251
MVLG_02157	119	127.22	54.15	48.65	27.24	33.12	18.53	24.93	89.84	49.98	69.7	47.78	58.06	46.17	-1.13	3.533e-05	-1.947	1.676e-10	-2.493	3.183e-15	-0.9917	0.002677	-1.199	0.001941	-0.780509	0.07099	-1.362	0.0001271	0.090662	0.8631	-0.110004	0.9804	-0.5558	0.8123	0.9426	0.02411	0.6874	0.3874	1.50616	0.0001728	1.231	0.02821	0.225065	0.7408
MVLG_04110	109.16	279.47	33.98	28.28	20.65	11.32	4.96	11.38	128.56	51.08	144.44	98.6	59.09	34.83	-2.53	3.697e-18	-3.558	2.104e-25	-4.714	3.257e-36	-1.02	0.001983	-1.754	3.183e-05	-0.992036	0.07099	-2.18	2.765e-06	1.46549	0.000152	0.72353	0.3442	-1.149	0.466	2.533	2.567e-09	1.745	0.003063	3.67778	5.549e-16	2.856	6.085e-07	0.735158	0.2288
MVLG_00751	94.12	91.15	21.69	21.99	44.75	37.04	91.87	58.15	108.17	171.31	156.79	67.03	38.38	50.3	-1.949	6.033e-11	-1.105	0.0004116	-0.2609	0.4177	0.5227	0.1533	-0.8819	0.05075	0.8746	0.07106	1.688	2.09e-06	2.41169	3.392e-10	1.01928	0.1245	0.8299	0.3042	1.608	4.587e-05	0.1714	0.9122	0.792698	0.0548	-0.6512	0.3681	1.40418	0.002703
MVLG_00118	8.46	6.04	3.15	1.55	11.76	4.7	12.45	7.13	19.02	20.64	11.88	0	4.13	5.73	-1.483	0.00697	0.2524	0.6679	0.5395	0.1948	1.105	0.002079	-0.6022	0.1641	1.73969	0.07108	2.008	0.001847	2.52908	3.559e-06	0.816342	0.9232	0.271	1	0.8337	0.128	-0.8988	0.3681	0.586549	0.2416	-1.155	0.09693	1.71926	0.0008199
MVLG_05364	345.99	283.92	565.78	786.24	1189.43	1041.74	1286.57	1012.34	1055.11	914.91	805.67	1036.73	827.66	760.2	1.265	2.94e-06	1.935	1.901e-11	1.963	3.437e-11	1.614	2.993e-06	1.639	4.495e-05	0.702317	0.07145	0.6975	0.0532	0.29355	0.5056	0.333201	0.8091	0.01512	1	-0.3379	0.4491	-0.349	0.7127	-0.338162	0.467	-0.3645	0.6118	-0.0129522	1
MVLG_04494	80.44	176.72	50.3	35.66	81.75	80.36	84.44	140.84	109.37	91.14	131.63	120.48	66.98	110.57	-1.461	1.877e-06	-0.5995	0.0711	-0.1834	0.6337	-0.3324	0.3619	-0.3734	0.4789	0.892802	0.07259	1.275	0.0008724	1.07753	0.008991	1.03592	0.1223	0.4076	0.9352	0.2539	0.6424	0.1683	0.9262	-0.149293	0.7753	-0.2498	0.8138	0.0483191	0.9982
MVLG_02431	3.87	2.96	18.06	19.56	5.57	5.36	4.43	5.86	20.53	19.28	10.62	0	14.14	21.12	2.607	2.762e-07	0.7675	0.4818	0.5656	0.4184	2.197	1.188e-08	2.364	0.001332	-1.77111	0.07336	-2.013	0.007328	-0.470824	0.4363	-0.283217	0.8862	NA	NA	1.404	0.07848	1.495	0.5384	1.62434	0.01278	1.707	0.2545	-0.150786	0.9263
MVLG_06999	1.32	1.11	10.85	11.63	3.32	3.22	6.1	11.4	8.51	19.79	10.61	0	13.74	15.51	3.337	1.456e-09	1.5	0.1502	2.748	1.08e-07	3.365	7.865e-17	3.555	7.151e-08	-1.77005	0.07336	-0.5872	0.5424	-0.0410051	0.9045	0.173798	1	1.224	0.688	1.832	0.01302	1.947	0.1402	0.581151	0.4533	0.7117	0.7805	-0.190506	0.9805
MVLG_00356	103.54	91.38	228.48	193.41	138.63	128.82	117.44	111.72	82.57	56.55	90.19	158.09	181.87	192.15	1.249	1.814e-06	0.5351	0.07383	0.2694	0.4074	-0.5059	0.1497	0.9399	0.02133	-0.678364	0.0736	-0.9757	0.002811	-1.80431	3.501e-08	-0.346741	0.7427	-0.2769	0.9804	-1.054	0.00411	0.3506	0.735	-0.763943	0.0517	0.625	0.3234	-1.43238	0.0005467
MVLG_01450	49.88	54.38	161.15	125.86	104.19	72.4	62.37	96.42	59.59	65	64.26	143.47	142.47	160.28	1.593	3.288e-09	0.8269	0.007308	0.6298	0.04309	0.1423	0.7395	1.594	8.396e-05	-0.731701	0.07402	-0.9599	0.006699	-1.50475	8.842e-06	-0.0384792	1	-0.2028	1	-0.7013	0.08436	0.7118	0.3297	-0.490404	0.2623	0.9053	0.1184	-1.43817	0.0007238
MVLG_04005	203.61	167.38	288.9	526.1	671.74	676.36	568.14	922.53	227.17	337.93	385.25	155.52	306.51	360.58	1.289	2.344e-06	1.968	1.197e-11	2.078	3.214e-12	0.7852	0.02721	0.8959	0.04941	0.709083	0.07402	0.7867	0.024	-0.567298	0.1376	-0.434487	0.5654	0.1014	1	-1.202	0.000839	-1.133	0.018	-1.2953	0.0002838	-1.242	0.005312	-0.0891748	0.9824
MVLG_04962	78.53	63.77	306.97	247.81	190.15	152.77	98.16	142.79	155.65	90.65	109.61	277.2	225.61	367.52	2.109	6.033e-15	1.352	6.607e-06	0.797	0.01056	0.6234	0.08379	2.143	1.239e-07	-0.720609	0.07402	-1.307	9.281e-05	-1.53212	5.893e-06	-0.0038582	1	-0.5618	0.7343	-0.7412	0.0663	0.7359	0.2997	-0.168802	0.7524	1.288	0.01241	-1.50289	0.0003616
MVLG_01831	5.28	3.33	3.65	6.7	1.38	0.91	0.95	1.49	59.83	70.88	71.38	25.13	25.56	4.07	0.42	0.4442	-1.985	0.01857	-2.071	0.001766	3.845	4.24e-24	2.052	2.248e-05	-2.29577	0.07435	-2.436	0.004964	3.36502	3.042e-14	1.57583	0.03394	NA	NA	5.805	9.359e-22	3.865	1.961e-05	5.91201	8e-26	3.991	8.384e-08	1.80419	0.0002489
MVLG_04167	316.93	417.56	82.91	0	0	16.15	1.88	4.5	1.65	6.38	7.97	0	128.44	122.17	-2.946	4.765e-17	-5.345	3.416e-24	-7.001	5.999e-34	-5.735	2.395e-51	-1.373	9.726e-05	-2.28572	0.07435	-3.873	0.0001838	-2.84051	9.212e-06	1.52009	0.1994	NA	NA	-0.4154	0.9446	3.788	0.0001618	1.24574	0.6833	5.33	1.071e-06	-4.34216	1.406e-15
MVLG_02310	105.48	86.69	22.36	29.38	13.48	11.73	10.64	19.26	112.83	90.95	103.63	65.28	55.59	30.07	-1.738	2.707e-08	-2.946	1.207e-14	-2.778	1.618e-14	-0.03364	0.93	-0.954	0.03811	-1.16748	0.07453	-1.039	0.06358	1.65047	3.984e-05	0.737018	0.4448	0.1645	1	2.897	2.655e-10	1.922	0.003659	2.72638	4.252e-10	1.733	0.004985	0.928408	0.09016
MVLG_04142	172.58	112.77	292.81	304.17	505.64	470.39	561.33	518.9	482.17	398.38	381.06	339.98	325.07	283.63	1.217	5.137e-06	1.869	5.41e-11	1.978	2.031e-11	1.467	2.115e-05	1.236	0.002239	0.686085	0.07494	0.7633	0.02694	0.197323	0.6692	-0.0181119	1	0.0976	1	-0.4178	0.3268	-0.6837	0.2923	-0.501545	0.2384	-0.7834	0.1503	0.241188	0.7271
MVLG_02505	235.79	132.66	903.22	1060.82	1560.93	1587	1504.43	1469.08	922.73	886.25	703.98	887.02	763.43	590.16	2.581	6.392e-22	3.209	8.058e-28	3.093	1.73e-24	2.172	5.053e-10	2.132	9.947e-08	0.663579	0.07598	0.5148	0.1649	-0.464489	0.2249	-0.484898	0.5654	-0.1279	1	-1.056	0.003352	-1.126	0.02368	-0.915121	0.01469	-1.002	0.04263	0.0477851	0.9676
MVLG_03494	67.62	61.88	38.94	33.05	23.25	17.39	22.52	16.08	30.06	22.5	24.57	38.09	26.2	31.87	-0.7123	0.01436	-1.6	7.861e-07	-1.69	7.558e-08	-1.494	4.17e-06	-1.027	0.01999	-0.85128	0.07598	-0.972	0.01239	-0.832538	0.03099	-0.357817	0.8552	-0.1036	1	0.09166	0.899	0.517	0.5928	0.214955	0.695	0.6306	0.3787	-0.459442	0.4476
MVLG_04622	111.45	104.86	19.21	1.68	2.98	4.34	3.35	5.91	9.09	17.07	13.43	13.62	8.88	24.66	-3.244	3.557e-24	-4.799	2.571e-31	-4.637	8.494e-33	-3.123	3.383e-22	-2.693	6.227e-10	-1.49685	0.07598	-1.378	0.04058	0.0670142	0.9128	0.505794	0.8091	0.1525	1	1.649	0.008371	2.019	0.02123	1.48943	0.007914	1.854	0.01315	-0.437513	0.5389
MVLG_07092	14.71	13.13	67.2	48.1	75.35	125.05	62.15	127.2	38	61.03	65.32	46.12	61.97	78.74	2.19	9.156e-13	2.95	2.096e-20	2.785	2.206e-18	1.892	9.401e-08	2.363	1.084e-07	0.797444	0.07642	0.5974	0.1458	-0.355116	0.4062	0.132717	1	-0.1733	1	-1.08	0.005013	-0.648	0.3623	-0.90745	0.01933	-0.4927	0.4308	-0.458604	0.5088
MVLG_03447	0.45	0.28	96.61	82.57	62.79	39.95	47.96	54.17	7.07	14.72	16.55	26.24	36.83	46.13	8.053	3.924e-62	7.183	4.933e-34	7.135	8.122e-46	5.1	4.782e-26	6.84	2.159e-17	-0.834807	0.07767	-0.9154	0.02338	-3.02089	1.528e-17	-1.24336	0.0275	-0.05627	1	-2.112	1.184e-07	-0.3915	0.7056	-2.05013	4.537e-08	-0.3414	0.6827	-1.75953	0.0004896
MVLG_00439	1452.71	3546.18	60.96	34.25	93.25	72.48	140.37	96.17	238.23	524.31	391.57	266.84	98.81	99.09	-5.603	4.484e-74	-4.862	4.07e-53	-4.378	1.479e-42	-2.833	4.228e-19	-4.177	2.487e-27	0.773599	0.07836	1.227	0.0004855	2.71068	5.011e-13	1.37705	0.00481	0.4703	0.859	2.009	1.367e-07	0.6412	0.3463	1.55157	4.259e-05	0.1766	0.7873	1.33521	0.004014
MVLG_05007	116.18	201.56	14.98	10.96	22.54	34.59	31.42	33.57	56.72	49.79	61.41	48.72	28.34	23.04	-3.49	1.138e-24	-2.395	1.418e-12	-2.271	3.19e-12	-1.632	4.009e-07	-2.399	1.639e-07	1.12159	0.07836	1.214	0.01639	1.80577	6.225e-05	1.03342	0.244	0.11	1	0.7471	0.133	-0.06545	1	0.645897	0.1866	-0.1779	0.9598	0.77259	0.2806
MVLG_05954	901.47	868.25	49.42	32.19	97.47	87.96	96.88	106.25	60.99	74.72	61.01	39.96	61.86	75.92	-4.271	9.118e-37	-3.151	3.471e-21	-3.054	9.739e-21	-3.699	2.139e-29	-3.498	1.679e-16	1.1471	0.07836	1.214	0.01639	0.515398	0.3713	0.72318	0.6971	0.08623	1	-0.5682	0.263	-0.4067	0.7674	-0.646024	0.1594	-0.4981	0.5484	-0.188425	0.9052
MVLG_01937	69.29	57.39	12.22	18.37	35.02	25.17	46.78	46.08	49.91	59.48	45.57	31.99	34.37	29.01	-1.909	8.017e-10	-0.9996	0.002067	-0.4105	0.2148	-0.4289	0.2291	-0.9108	0.03489	0.937561	0.07981	1.496	9.583e-05	1.41992	0.0005032	0.950575	0.2273	0.5789	0.7406	0.5519	0.246	0.03154	1	-0.0150652	0.9737	-0.5484	0.4494	0.494442	0.4252
MVLG_05918	310.51	383.59	13.61	8.68	31.34	23.84	73.33	39.11	201.66	97.42	92.04	151.96	30.61	3.78	-4.824	3.831e-42	-3.579	2.762e-25	-2.542	2.828e-16	-1.55	1.609e-06	-3.394	6.044e-11	1.26582	0.08036	2.275	1.34e-06	3.2288	7.175e-13	1.35928	0.061	1.017	0.3006	2.019	3.786e-06	0.1432	0.7632	1.02715	0.01181	-0.8487	0.6046	1.8108	0.008595
MVLG_00723	47.9	38.82	9.27	2.75	2.39	3.59	2.82	2.34	7.52	14.76	14.17	10.05	7.47	9.32	-2.723	1.194e-20	-3.77	1.154e-27	-4.021	1.137e-31	-1.973	4.682e-10	-2.279	1.992e-08	-1.00257	0.08138	-1.285	0.003649	0.69559	0.1024	0.40382	0.8002	-0.2651	1	1.772	8.236e-05	1.426	0.03921	2.05161	1.126e-06	1.7	0.003051	0.305937	0.7191
MVLG_01712	45.09	55.65	186.46	143.03	84.87	111	114.92	102	63.05	59.68	76.1	170.27	182.73	224.88	1.889	1.648e-11	1.072	0.001083	1.19	0.0001552	0.3227	0.4066	2.002	1.523e-06	-0.779249	0.0817	-0.6945	0.07681	-1.61794	3.184e-06	0.0721105	1	0.1036	1	-0.7653	0.07204	0.8693	0.2144	-0.857165	0.03485	0.7658	0.2401	-1.665	0.0001045
MVLG_04433	200.66	185.61	97.19	81.39	48.18	54.75	71.24	61.01	228.68	144.63	170.65	198.93	101.07	84.05	-0.9737	0.000514	-1.82	6.531e-09	-1.498	9.848e-07	-0.2222	0.5562	-0.7032	0.1412	-0.80877	0.08182	-0.5202	0.221	0.703646	0.07615	0.226837	0.8676	0.3073	0.9938	1.584	8.443e-05	1.067	0.0807	1.29154	0.001111	0.7634	0.1987	0.475814	0.5031
MVLG_05896	289.53	398.04	53.09	58.83	107.25	97.96	174.94	173.73	203.13	111.5	184.78	301.89	112.12	66.27	-2.486	3.24e-17	-1.668	4.96e-08	-0.9388	0.002121	-1.158	0.0004036	-1.38	0.002609	0.848366	0.08194	1.545	1.478e-05	1.27922	0.001245	1.05192	0.06467	0.7169	0.5037	0.5001	0.285	0.2448	0.7742	-0.203853	0.6959	-0.4691	0.6721	0.203445	0.9197
MVLG_00196	19.22	14.15	25.73	23.99	41.23	75.46	48.97	59.85	67.02	42.03	43.58	29.62	30.74	38.02	0.736	0.1509	1.927	7.178e-06	1.748	2.888e-06	1.558	1.573e-05	1.217	0.04728	1.21664	0.0825	1.007	0.08886	0.768982	0.1583	0.430801	0.9028	-0.1911	1	-0.3871	0.5248	-0.7676	0.4885	-0.187727	0.7767	-0.5872	0.528	0.358739	0.6973
MVLG_00585	257.3	241.58	67.42	46.11	160.26	88.34	180.14	113.97	225.37	242.35	214.52	139.94	111.2	70.08	-1.972	2.375e-09	-0.9748	0.003861	-0.6438	0.04143	-0.09153	0.8151	-1.167	0.01199	1.02597	0.08274	1.33	0.002467	1.82661	1.188e-05	0.758449	0.4754	0.3173	0.9978	0.8675	0.05449	-0.2466	0.9258	0.571554	0.2086	-0.5509	0.5521	1.0851	0.04805
MVLG_06525	34.39	37.22	33.74	37.13	15.93	15.85	6.54	5.04	2.09	1.91	2.27	0	23.87	16.45	0.1236	0.7549	-1.089	0.01442	-2.536	4.628e-09	-4.186	1.756e-27	-0.7759	0.0276	-1.17193	0.0828	-2.638	3.942e-07	-4.36623	5.191e-20	-0.936948	0.1131	-1.444	0.2982	-3.112	1.532e-06	0.2428	1	-1.63888	0.0246	1.69	0.1282	-3.37229	4.516e-07
MVLG_06853	177.1	297.97	58.93	52.87	79.13	112.28	100.79	136.45	167.54	88.67	217.03	278.18	104.13	89.88	-1.964	3.106e-12	-1.23	3.848e-05	-0.98	0.001369	-0.7358	0.02949	-0.7767	0.1027	0.768386	0.0828	0.9839	0.007	1.18059	0.002026	1.13849	0.03017	0.2378	1	0.4844	0.2871	0.4099	0.5979	0.254156	0.635	0.1671	0.8044	0.0261989	0.9754
MVLG_02632	43.55	37.06	12.69	32.63	5.65	9.06	1.93	5.95	1084.66	902.09	718.73	330.53	155.38	32.13	-0.6846	0.07794	-2.353	6.609e-06	-3.598	1.041e-11	4.397	3.276e-30	1.834	1.121e-05	-1.61228	0.08397	-2.868	0.000236	5.02525	2.337e-31	2.45865	3.241e-06	NA	NA	6.731	1.656e-38	4.1	3.521e-10	7.97912	1.045e-45	5.302	1.244e-14	2.54364	1.172e-08
MVLG_04501	94.94	81.31	182.68	212.8	99.23	122.62	93.09	114.38	91.05	80.06	78.29	278.38	193.4	183.02	1.322	5.302e-06	0.4423	0.233	0.287	0.416	-0.09632	0.8152	1.379	0.001286	-0.84359	0.08591	-1.034	0.009088	-1.47381	4.802e-05	0.0135879	1	-0.1656	1	-0.5568	0.2504	0.8782	0.2331	-0.38366	0.4399	1.036	0.09217	-1.46753	0.001176
MVLG_02009	77.72	50.83	9.15	13.55	28.14	17.57	23.19	20.18	56.45	59.23	51.43	42.83	10.67	10.32	-2.354	1.66e-13	-1.415	1.402e-05	-1.517	1.799e-06	-0.341	0.3476	-2.159	3.878e-05	0.966449	0.08782	0.836	0.08555	1.95496	1.652e-06	0.142688	0.9105	-0.1114	1	1.057	0.01478	-0.7825	0.6378	1.18394	0.004235	-0.6642	0.6691	1.79092	0.00358
MVLG_05565	41.89	39.92	22.81	26.5	9.03	15.34	16.13	14.31	17.07	15.71	18.14	20.63	14.44	12.44	-0.5934	0.06391	-1.657	6.571e-06	-1.382	3.828e-05	-1.407	1.792e-05	-1.441	0.003355	-1.02492	0.08782	-0.7863	0.09873	-0.869946	0.03433	-0.890081	0.3773	0.2579	1	0.2303	0.7437	0.153	0.9748	-0.0152923	0.9914	-0.1	1	0.0385916	1
MVLG_01466	41.4	24.63	11.03	10.95	5.84	1.89	2.68	4.62	12.09	20.38	9.05	0	12.77	9.13	-1.437	8.49e-05	-3.017	3.204e-10	-3.264	1.768e-13	-1.33	5.132e-05	-1.556	8.769e-05	-1.52281	0.08834	-1.807	0.0134	0.0422573	1	-0.158532	0.8676	-0.2472	1	1.66	0.0119	1.371	0.4996	1.9108	0.001331	1.605	0.2107	0.23979	0.4819
MVLG_01513	29.43	23.54	55.5	56.77	29.18	40.91	17.7	29.35	29.71	23.07	36.08	32.88	47.96	55.42	1.221	4.52e-06	0.4959	0.11	-0.1516	0.6964	-0.002338	0.9897	0.8974	0.03626	-0.687652	0.08834	-1.37	3.361e-05	-1.27514	0.0001829	-0.361421	0.7061	-0.6563	0.549	-0.513	0.2246	0.3423	0.7767	0.147844	0.8197	0.9847	0.08838	-0.882558	0.06411
MVLG_01218	64.96	40.49	118.92	105.35	78.25	66.01	57.19	65.99	112.31	119.17	131.87	124.06	116.93	116.36	1.231	2.757e-06	0.5338	0.07652	0.2644	0.4148	1.051	0.002463	1.223	0.002109	-0.66209	0.08906	-0.962	0.003675	-0.234377	0.5792	-0.0437961	1	-0.2782	0.9822	0.5	0.2506	0.639	0.3681	0.789839	0.05568	0.9133	0.0942	-0.163756	0.8275
MVLG_07246	79.92	66.42	166.93	152.71	91.74	94.4	77.75	90.23	99.25	102.59	86.22	83.49	135.77	102.25	1.278	7.858e-06	0.4435	0.209	0.2445	0.4873	0.3349	0.3844	0.7998	0.09978	-0.797575	0.08906	-1.03	0.007311	-0.997917	0.006901	-0.516563	0.5448	-0.2089	1	-0.1276	0.8273	0.2934	0.8826	0.0903845	0.9092	0.4945	0.61	-0.443559	0.5405
MVLG_05980	152.29	153.5	37.35	36.21	28.89	105.22	68.66	121.8	62.18	69.04	83.69	29.56	43.21	38.68	-1.915	5.282e-10	-1.069	0.0008809	-0.6649	0.0447	-1.179	0.0003046	-1.811	1.564e-05	0.880953	0.09025	1.248	0.001645	0.67983	0.135	0.0602667	1	0.391	0.9652	-0.1313	0.827	-0.8065	0.2772	-0.523231	0.2311	-1.215	0.02986	0.646455	0.2635
MVLG_03106	1.21	1.72	840.41	801.11	511.39	558.11	350.31	453.87	39.81	79.05	91.81	426.47	733.49	808.21	9.255	3.154e-139	8.586	1.507e-108	8.131	3.939e-94	5.463	1.064e-38	8.895	1.047e-59	-0.632895	0.09115	-1.121	0.0003187	-3.85175	1.621e-31	-0.398953	0.6469	-0.466	0.8062	-3.143	8.746e-21	0.2529	0.8417	-2.66884	2.993e-15	0.7148	0.2234	-3.42252	2.398e-18
MVLG_05406	222.17	244.08	439.97	458.47	278.73	246.79	96.46	227.05	136.17	107.73	110.45	186.88	141.38	250.2	1.109	0.0001084	0.2844	0.439	-0.5236	0.1856	-0.8684	0.0117	0.0342	0.996	-0.78969	0.09172	-1.634	2.442e-05	-2.03113	7.983e-09	-1.11789	0.06347	-0.8074	0.549	-1.168	0.005468	-0.3088	0.8269	-0.366756	0.4647	0.4658	0.6884	-0.886049	0.1235
MVLG_00383	293.12	337.23	56.7	48.49	121.78	88.41	135.46	95.74	234.74	311.98	221.61	299.4	58.16	80.23	-2.434	2.883e-14	-1.501	4.404e-06	-1.359	1.362e-05	-0.3097	0.3936	-1.589	0.002517	0.961888	0.09192	1.075	0.01967	2.06624	4.211e-07	0.786024	0.2808	0.1272	1	1.172	0.006368	-0.1294	1	1.06298	0.009861	-0.2411	1	1.24817	0.05937
MVLG_01820	0.65	0.32	42.39	10.33	16.05	8.87	14.99	3.63	8.42	54.54	4.62	0	5.98	4.01	5.88	7.692e-29	4.735	1.891e-11	4.473	7.049e-18	5.515	1.25e-33	3.426	0.001391	-1.09968	0.09192	-1.388	0.002252	-0.441368	0.3333	-2.45775	0.0001013	-0.2824	1	0.734	0.2311	-1.341	0.155	1.05287	0.02151	-1.026	0.2236	2.07635	0.0001149
MVLG_00217	277.2	335.76	30.43	20.42	56.19	48.43	60.08	65.78	225.02	151.12	229.99	178.96	93.22	17.59	-3.453	2.215e-26	-2.472	4.135e-14	-2.249	1.74e-12	-0.6952	0.04147	-1.96	1.508e-05	1.00959	0.09399	1.202	0.01077	2.70848	5.809e-11	1.43722	0.01884	0.2122	1	1.764	2.25e-05	0.4586	0.586	1.56207	0.0001068	0.2449	0.722	1.2567	0.0256
MVLG_03953	27.65	51.54	41.49	22.56	83.42	49.27	129.42	79.32	194.97	341.71	203.95	19.79	34.95	24.11	-0.1765	0.6737	0.8028	0.02907	1.461	4.836e-06	2.571	5.639e-13	-0.2877	0.5746	1.00793	0.09451	1.637	6.365e-05	2.68834	4.181e-11	-0.155364	0.9804	0.6427	0.7261	1.747	2.161e-05	-1.148	0.137	1.12293	0.005111	-1.782	0.001385	2.88042	8.787e-10
MVLG_00535	69.82	107.65	55.02	48.21	91.98	105.08	139.97	130.84	185.71	204.15	270.67	118.65	124.95	82.37	-0.6459	0.06215	0.2366	0.5328	0.6593	0.04243	1.259	0.0002968	0.4139	0.4352	0.913662	0.09505	1.304	0.001331	1.85004	4.166e-06	1.01101	0.211	0.408	0.9716	1.006	0.02021	0.1142	0.9962	0.608355	0.1812	-0.294	0.738	0.859689	0.09629
MVLG_02490	117.25	87.09	147.88	193.57	229.33	317.22	234.18	302.82	248.7	275.91	315.01	250.72	188.72	179.77	0.8874	0.001164	1.522	1.113e-07	1.443	1.048e-06	1.348	9.511e-05	1.046	0.01024	0.670196	0.09505	0.5559	0.1411	0.403011	0.3355	0.118963	0.9796	-0.09176	1	-0.192	0.6902	-0.5259	0.4997	-0.0918661	0.8649	-0.4403	0.5334	0.30597	0.6575
MVLG_02607	0.13	0.07	281.71	189.68	166.9	121.61	75.71	81.55	9.02	35.18	41.53	108.96	224.29	334.11	11.14	4.697e-78	10.37	2.665e-51	9.462	3.688e-44	8.043	1.412e-35	11.16	3.319e-35	-0.738071	0.09759	-1.677	1.356e-06	-3.19772	5.238e-21	0.0287975	1	-0.917	0.2348	-2.387	7.096e-11	0.7779	0.3417	-1.46307	0.0001118	1.689	0.001385	-3.20121	8.918e-15
MVLG_02680	18.79	42.69	28.64	39.21	64.77	80.08	85.79	99.28	114.45	43.3	65.05	30.26	19.57	35.21	0.2688	0.5936	1.318	0.0009124	1.619	1.816e-06	1.168	0.0009951	-0.03526	1	1.07522	0.09792	1.343	0.004964	0.852583	0.08546	-0.352645	0.9732	0.2878	1	-0.1584	0.8406	-1.404	0.1374	-0.43502	0.4093	-1.7	0.01686	1.22492	0.07532
MVLG_04567	61.84	65.72	105.63	100.56	126.97	213.2	122.91	237.59	45.43	75.61	92.28	76.06	62.37	113.52	0.8329	0.004356	1.519	4.432e-07	1.531	4.12e-07	0.09259	0.8521	0.5382	0.27	0.723123	0.09822	0.6991	0.06883	-0.79923	0.03433	-0.337837	0.8312	0.001225	1	-1.447	7.093e-05	-1.039	0.0851	-1.44766	5.471e-05	-1.053	0.05059	-0.439812	0.503
MVLG_04508	163.67	133.53	249.1	268.19	472.49	362.07	454.72	359.89	548.31	439.29	442.2	532.87	294.22	294.8	0.9456	0.0004775	1.571	3.764e-08	1.506	3.345e-07	1.58	4.652e-06	1.327	0.0008302	0.657437	0.09854	0.5618	0.1347	0.582422	0.1399	0.342472	0.7641	-0.0759	1	-0.005271	0.9944	-0.2883	0.8143	0.0862358	0.8903	-0.212	0.8381	0.255155	0.7412
MVLG_00250	5.69	4.49	74.97	61.37	35.86	21.11	35.55	42.12	121.36	111.47	90.69	169.48	54.53	46.89	3.905	6.802e-17	2.575	0.0004152	2.977	7.967e-10	4.444	4.396e-27	3.804	2.348e-10	-1.28204	0.09864	-0.9219	0.1501	0.482395	0.3545	-0.145239	1	0.3882	1	1.848	0.0007374	1.162	0.212	1.46472	0.002488	0.7747	0.3819	0.630819	0.5542
MVLG_07103	27.92	25.72	29.72	43.26	69.2	96.14	93.24	92.54	84.68	84.95	70.07	114.99	52.58	56.05	0.5994	0.2238	1.74	2.527e-05	1.87	9.657e-08	1.604	7.864e-06	1.37	0.008057	1.16599	0.09883	1.265	0.01501	0.945542	0.06739	0.715014	0.6174	0.1156	1	-0.1574	0.8128	-0.4266	0.8457	-0.261556	0.6334	-0.5415	0.6771	0.234938	0.9084
MVLG_01922	226.53	264.94	40.85	96.41	23.82	52.42	32.71	55.48	128.14	91.64	76.99	60.77	86.55	29.12	-1.704	1.467e-09	-2.589	1.41e-15	-2.486	1.488e-14	-1.447	7.626e-06	-1.945	8.636e-07	-0.852122	0.09887	-0.7881	0.08038	0.199617	0.6826	-0.286525	0.8567	0.09369	1	1.124	0.01038	0.5755	0.6111	1.03168	0.01809	0.4617	0.6338	0.521735	0.3626
MVLG_01217	67.49	67.61	52.47	40.95	32.05	23.82	14.37	16.94	17.53	23.04	17.94	17.21	47.63	43.99	-0.3999	0.1796	-1.204	0.0001574	-2.098	1.526e-10	-1.924	1.833e-09	-0.6343	0.09089	-0.768469	0.09911	-1.693	3.755e-06	-1.58132	6.887e-06	-0.272756	0.8088	-0.8995	0.3591	-0.7399	0.09065	0.5055	0.6906	0.168163	0.8258	1.394	0.02208	-1.26512	0.00886
MVLG_05762	38.01	55.85	59.04	71.63	79.69	140.13	171.39	229.44	163.87	82.58	191.27	155.97	110.9	155.96	0.6062	0.04847	1.32	1.786e-05	2.125	1.74e-12	1.502	1.451e-05	1.635	7.732e-05	0.748752	0.09943	1.518	5.824e-06	0.846865	0.03344	0.982472	0.1167	0.7905	0.299	0.1709	0.7625	0.2567	0.8501	-0.611671	0.14	-0.5399	0.4215	-0.122379	0.8844
MVLG_04846	21.98	23.44	91.51	81.56	60.32	47.81	41.27	45.62	34.12	42.64	41.44	56.99	82.31	86.18	2.062	5.835e-14	1.321	1.958e-05	0.9629	0.002173	0.6607	0.06913	1.867	7.427e-06	-0.705938	0.09997	-1.096	0.001788	-1.45757	2.005e-05	-0.234913	0.8676	-0.3675	0.9737	-0.6788	0.101	0.4854	0.6254	-0.301131	0.5344	0.8478	0.1809	-1.18773	0.008526
MVLG_03197	114.16	72.72	29.15	35.17	66.93	45.55	89.64	53.05	103.12	74.15	86.64	35.16	54.44	49.05	-1.391	1.634e-06	-0.6541	0.03768	-0.3329	0.2934	-0.2271	0.547	-0.8363	0.03549	0.76782	0.1006	1.06	0.004717	1.11158	0.004488	0.514201	0.7157	0.3084	0.9804	0.4132	0.386	-0.2398	0.8264	0.124065	0.8288	-0.5419	0.3918	0.628338	0.2112
MVLG_06440	21.58	15.14	145.22	140.1	108.23	78.16	124.2	88.92	77.69	96.18	88.85	61.4	145.72	161.22	3.099	1.175e-29	2.418	1.784e-16	2.576	1.581e-17	2.113	1.468e-09	2.897	1.748e-12	-0.647542	0.1022	-0.5198	0.1639	-1.04312	0.002471	-0.240139	0.8325	0.147	1	-0.324	0.4725	0.4187	0.685	-0.456487	0.2984	0.2727	0.7872	-0.763072	0.1208
MVLG_03452	65.59	73.32	19.33	17.55	44.53	28.01	52.89	43.18	63.25	56.52	55.08	40.83	23.98	33.77	-1.779	5.813e-08	-0.8706	0.01062	-0.4852	0.1413	-0.3836	0.292	-1.124	0.02038	0.937087	0.103	1.293	0.002446	1.34183	0.001721	0.603904	0.6455	0.3733	0.9762	0.4723	0.3529	-0.3071	0.8786	0.114696	0.8594	-0.6749	0.4197	0.744929	0.2551
MVLG_06823	25.04	15.95	119.62	153.39	238.16	198.71	315.6	263.11	164.91	341.43	308.59	108.82	184.76	178.55	2.883	1.524e-25	3.497	3.302e-31	3.864	1.414e-34	3.617	1.276e-22	3.081	1.104e-13	0.646509	0.103	0.9815	0.002832	0.669513	0.08337	0.159836	0.9796	0.3554	0.954	0.09693	0.8719	-0.4732	0.4991	-0.247504	0.6101	-0.8301	0.09484	0.551512	0.2577
MVLG_03419	3.5	2.16	43.53	28.33	23.01	19.4	32.1	27.99	37.22	38.3	30.54	18.65	24.93	24.37	3.805	1.181e-34	2.986	5.299e-17	3.452	2.742e-25	3.497	1.117e-20	3.15	1.059e-11	-0.781009	0.1031	-0.347	0.4714	-0.361843	0.3937	-0.69135	0.3537	0.4534	0.9144	0.4912	0.3174	0.1056	1	0.0516442	0.9447	-0.3468	0.6599	0.361244	0.5593
MVLG_00202	44.35	39.97	135.67	129.57	50.75	90.55	41.52	92.27	79.83	50.75	53.71	59.25	32.66	38.02	1.808	4.349e-09	0.8618	0.02913	0.6362	0.06793	0.4933	0.1871	0.002842	0.9669	-0.907607	0.1035	-1.172	0.009238	-1.36589	0.0003635	-1.8422	0.004436	-0.2293	1	-0.3852	0.5074	-0.9139	0.437	-0.163126	0.7706	-0.7188	0.4295	0.501838	0.621
MVLG_04202	315.51	324.79	93.26	73.26	56.88	46.78	62.46	54.79	237.6	270.08	220.72	98.59	91.95	85.08	-1.81	1.506e-11	-2.555	1.364e-17	-2.413	1.643e-15	-0.5417	0.1182	-1.754	3.227e-06	-0.709113	0.1035	-0.5986	0.1262	1.2141	0.0009314	0.0155374	1	0.1302	1	1.995	2.026e-07	0.7451	0.3083	1.87889	8.255e-07	0.6155	0.3648	1.22468	0.004887
MVLG_06772	70.69	72.98	21.57	19.39	64.52	20.76	88	30.61	56.36	71.56	54.94	13.18	29.59	28.13	-1.671	8.866e-07	-0.6973	0.04451	-0.1763	0.5442	-0.3322	0.3605	-1.266	0.003601	1.00049	0.1035	1.496	0.0006424	1.28124	0.003837	0.359328	0.939	0.5043	0.908	0.3487	0.5184	-0.6241	0.4668	-0.127614	0.8599	-1.106	0.06586	0.952352	0.06509
MVLG_06936	172.62	116.24	351.18	388.71	713.49	496.96	429.94	618.34	821.5	498.36	478.26	329.3	443.83	473.52	1.522	3.346e-08	2.164	1.686e-13	1.936	1.118e-10	2.046	4.392e-09	1.78	1.564e-05	0.674177	0.1035	0.4162	0.3154	0.474521	0.248	0.220019	0.9432	-0.2349	1	-0.1317	0.806	-0.441	0.5438	0.117523	0.8523	-0.2118	0.7673	0.286981	0.6187
MVLG_06688	15.92	19.89	197.23	151.17	88.77	122.63	81.88	128.37	19.74	30.23	38.42	15.43	217.33	270.32	3.417	1.25e-31	2.653	2.957e-16	2.574	7.941e-16	0.6659	0.0806	3.589	4.425e-16	-0.726109	0.1036	-0.8398	0.02885	-2.80755	1.603e-16	0.134468	1	-0.08819	1	-2.007	6.553e-08	0.8659	0.2997	-1.91777	1.113e-07	0.9392	0.172	-2.89842	3.089e-12
MVLG_04672	342.57	314.33	513.43	592.18	1129.32	678.51	1262	1107.28	894.74	1674.76	1211.77	399.31	587.85	560.3	0.9131	0.0009273	1.55	8.844e-08	1.941	5.452e-11	2.015	6.995e-09	0.9547	0.02839	0.667032	0.104	1.028	0.002047	1.03937	0.005236	0.0018487	1	0.3814	0.9298	0.4435	0.3209	-0.6538	0.2945	0.0755878	0.9091	-1.035	0.0283	1.08182	0.009996
MVLG_05342	49.03	44.44	10.67	5.36	30.28	13.72	18.85	21.1	26.15	26.8	30.78	16.43	26.08	26.41	-2.396	3.97e-08	-1.015	0.01499	-1.2	0.00156	-0.815	0.01787	-0.7378	0.145	1.3951	0.1052	1.186	0.1136	1.52467	0.007288	1.5911	0.144	-0.1921	1	0.1841	0.8239	0.216	0.9875	0.384273	0.5737	0.4008	0.8085	-0.0653755	1
MVLG_04738	16.82	17.41	11.44	20.66	47.11	16.38	74.57	37.32	17.37	33.43	31.82	8.13	12.87	17.77	0.04474	0.9404	0.944	0.008857	1.769	1.659e-08	0.5926	0.1167	-0.1526	0.7734	0.924419	0.1062	1.721	9.698e-06	0.483174	0.3474	-0.243622	0.9432	0.8119	0.4002	-0.3701	0.4637	-1.147	0.1203	-1.16352	0.00217	-1.947	0.0002476	0.749893	0.2199
MVLG_03653	133.66	137.23	266.67	268.27	404.57	440.69	520.55	363.83	404.89	634.39	503.56	469.3	363.55	305.32	1.122	3.006e-05	1.731	1.344e-09	1.752	2.89e-09	1.838	1.117e-07	1.524	0.0001273	0.644491	0.1072	0.6322	0.08405	0.656914	0.09046	0.363206	0.7545	0.006972	1	0.08643	0.888	-0.2568	0.8384	0.0910425	0.8843	-0.2648	0.7535	0.321122	0.6254
MVLG_03070	28.35	22.62	82.83	93.31	51.19	57.34	49.36	60.83	35.99	37.17	45.12	80.75	82.52	98.61	1.931	3.766e-12	1.179	0.0002247	1.144	0.0002545	0.5089	0.1724	1.881	6.664e-06	-0.716268	0.1082	-0.7858	0.04315	-1.47847	1.947e-05	-0.090056	0.9891	-0.04573	1	-0.6884	0.1036	0.6437	0.437	-0.635271	0.1349	0.6821	0.3162	-1.36114	0.002103
MVLG_03398	0	0	514.79	670.43	374.05	378.59	176.53	251.33	69.4	99.64	131.62	910.51	903.62	811.94	14.71	2.784e-94	13.99	5.617e-68	13.17	9.669e-59	12.34	4.333e-48	14.95	7.008e-47	-0.671319	0.1082	-1.569	1.994e-06	-2.74167	1.706e-16	0.528589	0.5436	-0.8723	0.2329	-1.996	1.942e-08	1.218	0.02427	-1.11891	0.003324	2.079	1.054e-05	-3.24458	4.163e-16
MVLG_05772	2.27	4.78	419.33	430.14	220.86	290.24	71.01	180.37	21.61	41.28	44.04	372.47	280.44	466.44	7.047	9.573e-74	6.275	1.512e-47	5.115	3.49e-35	3.464	3.401e-16	6.93	7.883e-32	-0.736019	0.1082	-1.933	1.555e-07	-3.64415	4.765e-25	-0.155132	0.9547	-1.16	0.106	-2.834	8.17e-14	0.5989	0.4893	-1.68746	2.073e-05	1.722	0.001751	-3.4722	4.171e-16
MVLG_05095	93.14	83.52	97.9	95.68	46.56	77.86	35.09	46.54	16.94	15.51	30.8	70.62	77.26	102.15	0.2659	0.3515	-0.4094	0.1806	-1.084	0.0003252	-2.219	2.618e-12	-0.007889	0.975	-0.636714	0.1085	-1.348	2.018e-05	-2.53882	7.176e-15	-0.312312	0.7857	-0.6877	0.4539	-1.825	1.31e-07	0.3455	0.7422	-1.13171	0.002176	1.024	0.05622	-2.20122	2.643e-08
MVLG_00485	365.73	223.06	728.69	1015.95	1395.97	1335.79	1404.23	1418.22	1228.51	1031.99	889.14	980.52	825.13	632.95	1.733	5.175e-11	2.327	3.477e-16	2.345	2.595e-15	1.836	1.147e-07	1.585	6.848e-05	0.627425	0.1093	0.6131	0.08886	0.0478491	0.9345	-0.185262	0.9316	0.006906	1	-0.5083	0.2121	-0.7912	0.1848	-0.501433	0.2373	-0.8011	0.1343	0.259125	0.7049
MVLG_07142	20.37	26.81	40.07	48.51	19.23	15.25	4.3	12.6	5.86	4.73	8	0	108.29	178.6	1.051	0.01164	-0.3684	0.6072	-1.7	0.005686	-1.948	3.253e-07	2.588	9.056e-08	-1.37037	0.1097	-2.717	8.381e-05	-3.05519	1.14e-09	1.48721	0.0605	-1.309	0.8923	-1.593	0.05621	2.861	0.0001067	-0.266176	0.7401	4.143	1.599e-08	-4.49523	2.337e-18
MVLG_07256	37.51	42.2	1397.51	1501.56	1143.75	778.37	1064.35	1014.92	231.15	453.96	465.79	1377.48	1861.57	1998.09	5.337	5.94e-69	4.675	3.48e-48	4.779	6.236e-47	3.308	3.079e-19	5.664	1.795e-34	-0.629651	0.1097	-0.5563	0.1308	-2.09018	1.141e-10	0.287398	0.8604	0.09383	1	-1.388	8.116e-05	0.9323	0.1143	-1.46989	2.696e-05	0.8379	0.1347	-2.34334	1.634e-09
MVLG_04694	100.83	115.17	10.7	23.5	45.53	34.42	40.6	32.11	137.67	79.5	79.45	66.67	29.84	42.85	-2.519	2.935e-11	-1.353	0.0002934	-1.491	1.386e-05	-0.2204	0.5764	-1.343	0.01109	1.1864	0.1108	1.022	0.1312	2.2466	1.199e-06	1.11322	0.2536	-0.151	1	1.121	0.01901	-0.04472	1	1.29294	0.002949	0.1162	0.9069	1.12868	0.08126
MVLG_02796	143.53	108.65	171.97	241.37	384.31	424.14	328.69	437.97	558.32	198.37	168.54	196.07	291.66	139.27	0.8366	0.06696	1.853	4.915e-06	1.753	8.476e-07	1.676	2.566e-06	1.465	0.008748	1.04345	0.1123	0.912	0.102	0.794834	0.1034	0.581858	0.8312	-0.11	1	-0.1856	0.8216	-0.4515	0.6509	-0.0627021	0.9564	-0.3538	0.6688	0.259216	0.659
MVLG_03375	2.71	2.76	202.69	184.09	430.27	195.9	500.81	304.84	154.31	415.48	313.58	149.26	310.28	334.08	6.277	5.221e-78	6.889	6.043e-79	7.237	1.131e-80	6.657	4.018e-52	6.77	1.229e-40	0.641624	0.1123	0.9625	0.003862	0.3153	0.4722	0.455335	0.6971	0.3393	0.9697	-0.256	0.5803	-0.177	0.8653	-0.580576	0.1578	-0.5129	0.3681	-0.0943877	0.9487
MVLG_03656	7.02	6.85	29.65	40.19	16.89	17.67	10.14	10.02	41.42	13.17	5.52	90.57	18.17	16.26	2.471	6.043e-12	1.401	0.004214	0.5757	0.2224	1.243	0.0005497	1.878	0.0001503	-1.0319	0.1123	-1.887	9.575e-05	-1.27387	0.005641	-0.643902	0.8919	-0.8313	0.809	-0.1642	0.9229	0.4278	0.6252	0.693091	0.1907	1.264	0.05767	-0.618785	0.2979
MVLG_05369	34.69	35.58	63.33	77.61	43	25.15	23.27	33.79	24.55	16.61	19.82	0	47.85	32.3	1.154	0.001267	0.03932	0.984	-0.309	0.5878	-0.8459	0.02425	0.3331	1	-1.07477	0.1123	-1.458	0.006427	-2.05575	1.743e-06	-0.858356	0.2001	-0.3519	1	-0.8989	0.1566	0.226	1	-0.543328	0.3946	0.5583	0.9174	-1.14246	0.2447
MVLG_04388	130.73	121.04	300.75	310.61	173.43	182.48	148.87	93.09	120.58	100.71	108.36	0	146.31	187.61	1.446	7.725e-07	0.6178	0.08855	0.0895	0.8738	-0.1147	0.7852	0.5381	0.617	-0.792299	0.1127	-1.351	0.0003128	-1.61505	7.99e-06	-0.946573	0.04086	-0.545	0.8469	-0.7493	0.1033	-0.1457	0.7781	-0.180685	0.7951	0.4123	0.8768	-0.622755	0.6105
MVLG_05284	360.38	478.94	37.08	20.7	31.18	77.64	38.17	115.88	64.49	106.99	68.12	16.92	16.32	50.12	-3.725	6.583e-32	-2.843	1.161e-18	-2.477	1.595e-14	-2.463	8.458e-15	-3.672	1.299e-17	0.915483	0.1132	1.244	0.002744	1.20331	0.00615	0.0050265	1	0.3606	0.9727	0.3537	0.5235	-0.8886	0.3022	-0.0183411	0.9373	-1.281	0.03385	1.21313	0.02401
MVLG_03030	149.24	231.97	90.09	80.64	148.44	131.89	204.59	150.9	370.19	338	393.37	454.01	154.64	80	-1.033	0.0002294	-0.3754	0.2379	-0.06697	0.8462	0.8152	0.0205	0.04637	0.8211	0.690539	0.1144	0.9667	0.006318	1.79567	9.612e-07	1.03285	0.05054	0.2946	0.9799	1.176	0.002549	0.3866	0.594	0.89597	0.02595	0.0959	0.8599	0.748116	0.2002
MVLG_05982	54.18	42.01	36.5	30.14	61.25	47.95	148.29	123.03	79.59	117.69	122.41	42.93	68.88	50.16	-0.3921	0.1875	0.2579	0.4292	1.532	1.914e-07	1.008	0.003808	0.2864	0.607	0.683899	0.1154	1.927	7.5e-10	1.34253	0.0002878	0.640397	0.4617	1.263	0.006149	0.7307	0.07817	-0.02908	0.9944	-0.520612	0.2166	-1.293	0.004186	0.737694	0.1125
MVLG_03699	131.41	123.77	179.37	176.69	117.9	114.5	104.07	108.01	69.94	78.61	90.54	116.08	186.28	167.08	0.6164	0.02345	-0.05512	0.8853	-0.2312	0.4913	-0.8143	0.0149	0.4128	0.3868	-0.636658	0.1162	-0.845	0.01362	-1.48645	8.216e-06	-0.242414	0.8533	-0.1871	1	-0.7763	0.04584	0.4096	0.6809	-0.578327	0.1662	0.593	0.3783	-1.20998	0.004988
MVLG_00059	342.06	282.26	369.11	535.81	1037.47	526.07	512.14	673.23	419.96	307.94	346.75	532.26	281.77	265.06	0.6819	0.03525	1.44	7.369e-06	1.062	0.0008727	0.5289	0.152	0.4254	0.4042	0.786719	0.1173	0.3797	0.4439	-0.20661	0.6804	-0.30089	0.9243	-0.3825	0.9737	-0.9238	0.02522	-1.066	0.1309	-0.529754	0.247	-0.6902	0.3612	0.114328	0.9349
MVLG_06474	237.04	184.95	18.44	0	33.74	9.01	48.84	24.87	13.2	15.99	19.13	21.35	24.26	20.33	-4.376	3.36e-37	-3.242	1.329e-21	-2.424	6.434e-15	-3.792	1.361e-30	-3.125	3.592e-13	1.16002	0.1173	1.954	3.019e-05	0.532739	0.2622	1.20111	0.2901	0.8027	0.5771	-0.5652	0.3089	0.06171	1	-1.34734	0.0007197	-0.7229	0.3559	-0.661421	0.3391
MVLG_01306	9.31	5.82	496.82	467.02	862.47	641.13	607.65	636.04	67.36	152.7	161.32	250.88	396.29	377.02	6.142	5.291e-83	6.717	2.172e-82	6.414	9.757e-72	3.999	1.659e-25	5.641	5.564e-33	0.608641	0.1174	0.2764	0.5225	-2.20513	9.629e-12	-0.536914	0.4413	-0.3118	0.9762	-2.741	2.49e-16	-1.131	0.01686	-2.41827	8.26e-13	-0.8212	0.1014	-1.63184	6.102e-05
MVLG_02380	14.13	23.52	49.01	63.86	30.72	34.28	33.32	35.53	268.21	254.69	254.29	140.89	126.92	27.5	1.709	1.513e-08	0.8601	0.02229	0.8898	0.008736	3.648	1.174e-22	2.315	4.971e-08	-0.814697	0.1174	-0.8203	0.05923	1.88326	4.415e-07	0.558333	0.5366	0.01735	1	2.772	1.002e-11	1.395	0.01778	2.76434	4.313e-12	1.374	0.011	1.33978	0.003918
MVLG_02793	7.78	4.49	23.5	30.79	39.53	53.41	42.34	54.67	38.56	36.55	38.09	35.42	23.06	33.85	2.294	1.76e-12	3.021	9.27e-20	3.017	1.804e-20	2.492	4.766e-12	2.333	4.056e-07	0.760431	0.1174	0.7226	0.0842	0.141524	0.7972	-0.0046033	1	-0.01457	1	-0.5476	0.2165	-0.7409	0.3934	-0.525973	0.2333	-0.7337	0.3084	0.160188	0.8978
MVLG_07111	55.55	60.57	50.78	38.39	20.91	17.08	14.07	11.75	14.95	28.87	28.78	27.86	65.56	117.89	-0.2308	0.599	-1.523	0.001671	-2.074	1.303e-06	-1.205	0.0002649	0.7065	0.2168	-1.24468	0.1175	-1.826	0.00195	-1.03442	0.0235	0.88925	0.4498	-0.5578	1	0.2939	0.821	2.144	0.008062	0.870342	0.2038	2.713	3.899e-05	-1.90813	0.000124
MVLG_05444	3.48	4.09	82.81	79.1	166.8	96.02	237.93	158.54	48.27	123.83	122.35	67.44	115.82	121.26	4.547	5.41e-49	5.172	8.39e-54	5.739	1.897e-60	4.578	3.021e-31	4.897	3.639e-26	0.65563	0.1195	1.193	0.0002464	-0.0319143	0.941	0.310112	0.8774	0.5563	0.6669	-0.6154	0.1235	-0.334	0.6869	-1.15898	0.001339	-0.8884	0.07216	-0.301157	0.6895
MVLG_00990	115.34	97.04	482.04	708.61	829.39	998.51	955.06	1136.29	207.05	416.8	591.64	371.5	410.4	364.62	2.633	8.95e-23	3.204	8.653e-28	3.354	4.625e-28	1.862	7.955e-08	1.954	1.057e-06	0.604982	0.1206	0.7201	0.0346	-0.834001	0.01792	-0.719354	0.24	0.1372	1	-1.361	8.925e-05	-1.304	0.004711	-1.4912	1.704e-05	-1.446	0.0008834	-0.0823338	0.9345
MVLG_06749	131.78	140.5	22.94	24.41	37.84	55.49	97.18	82.55	64.02	78.15	68.67	49.87	57.32	32.86	-2.383	9.33e-13	-1.449	2.131e-05	-0.5451	0.09263	-1.03	0.001816	-1.418	0.001144	0.963227	0.1215	1.834	9.584e-06	1.29436	0.00404	0.91506	0.381	0.8867	0.3636	0.3975	0.4861	-0.03361	1	-0.477622	0.2991	-0.9177	0.1526	0.402532	0.5743
MVLG_02747	18.79	29.7	17.08	6.02	42.71	10.31	98.05	34.84	52.21	168.76	100.29	24.52	25.92	26.27	-0.9438	0.02139	0.1711	0.7675	1.533	1.642e-06	2.059	5.249e-09	0.2011	0.7826	1.13835	0.1221	2.474	7.588e-09	2.93876	1.453e-11	1.08973	0.3343	1.344	0.0337	1.866	1.255e-05	-0.02614	1	0.543781	0.2188	-1.348	0.02526	1.86832	0.0001492
MVLG_00060	48.88	54.03	48.1	68.91	85.58	107.13	147.44	114.87	84.62	98.51	92.98	66.94	73.77	78.12	0.3208	0.3093	0.9919	0.00123	1.39	3.975e-06	0.7165	0.04537	0.6196	0.1862	0.703601	0.1227	1.067	0.002639	0.336589	0.4626	0.254235	0.9228	0.3824	0.9578	-0.2941	0.5331	-0.4315	0.6324	-0.664308	0.1058	-0.8138	0.153	0.112246	0.8915
MVLG_01112	39.71	84.23	16.19	19.27	7.87	3.78	12.07	9.32	28.7	33.52	32.31	0	24.9	8.92	-1.682	9.028e-06	-3.351	5.717e-11	-2.457	5.08e-10	-1.054	0.001682	-1.73	2.051e-05	-1.6052	0.123	-0.7694	0.3567	0.568925	0.3368	-0.094684	0.9432	0.8638	0.9804	2.278	0.0006412	1.51	0.5384	1.41537	0.006691	0.6688	0.828	0.704541	0.1013
MVLG_02452	3.14	2.18	27.87	18.22	3.72	12.54	8.25	5.88	24.22	21.17	13.1	17.18	13	25.41	3.259	6.037e-11	1.719	0.04561	1.525	0.01759	2.765	2.431e-12	2.912	1.959e-05	-1.48352	0.1234	-1.714	0.004855	-0.551661	0.3145	-0.387945	0.9131	-0.208	1	1.02	0.1746	1.11	0.4689	1.25078	0.03252	1.338	0.2027	-0.139654	0.9229
MVLG_05231	56.09	44.3	25.08	25.28	13.96	13.05	16.51	10.71	40.22	43.77	42.19	42.47	28.74	16.31	-0.8544	0.005703	-1.811	4.218e-07	-1.798	5.039e-08	-0.3844	0.287	-0.907	0.06867	-0.919269	0.1238	-0.9376	0.0313	0.413669	0.3767	-0.0968411	1	-0.002935	1	1.408	0.002092	0.8447	0.3376	1.43236	0.0006396	0.8646	0.1976	0.522872	0.5119
MVLG_06576	15.51	10.42	12.36	19.4	31.49	24.71	40.88	33.04	29.17	35.16	32.47	23.16	24.09	24.82	0.4377	0.1959	1.195	0.0002332	1.557	4.829e-07	1.179	0.000767	0.9796	0.03325	0.787033	0.1242	1.118	0.003713	0.68123	0.1141	0.497457	0.7091	0.3501	0.9762	-0.03463	0.9538	-0.271	0.8582	-0.370748	0.4349	-0.6185	0.3681	0.209043	0.7921
MVLG_00642	0.07	0.23	52.98	76.86	36.91	39.15	8.6	11.31	10.32	4.53	7.71	21.84	84.46	40.18	8.809	4.657e-57	7.981	3.615e-30	5.947	1.723e-14	5.353	3.606e-24	8.58	1.656e-24	-0.792697	0.1245	-2.856	5.887e-12	-3.52175	4.028e-20	-0.249071	0.8036	-2.036	0.001026	-2.651	1.035e-09	0.5488	0.6825	-0.601835	0.3678	2.566	2.072e-05	-3.20469	5.499e-12
MVLG_00013	0.35	0.24	136.68	170.25	93.62	105.77	32.64	54.13	7.27	8.53	15.48	70.14	119.27	99.67	9.15	3.091e-100	8.476	4.88e-74	7.202	6.76e-57	5.045	4.03e-28	8.484	7.859e-38	-0.640382	0.1248	-1.95	1.775e-09	-4.16914	1.729e-33	-0.700307	0.2484	-1.281	0.01099	-3.454	3.871e-22	-0.04617	0.982	-2.17201	2.627e-09	1.218	0.0281	-3.44053	1.087e-16
MVLG_00749	1194.74	1101.63	2448.66	2555.89	1782.9	1377.77	788.43	1254.7	704.63	188.26	179.71	1589.32	319.36	441.63	1.279	1.752e-06	0.5968	0.05345	-0.03656	0.9547	-1.403	3.033e-05	-0.7283	0.2032	-0.647154	0.1248	-1.312	8.817e-05	-2.71946	1.419e-15	-2.05353	4.854e-05	-0.64	0.6032	-2.004	4.144e-08	-1.368	0.03962	-1.34788	0.0004676	-0.7327	0.3963	-0.669976	0.202
MVLG_01374	2.03	1.98	33.5	27.6	74.69	27.95	71.45	38.74	26.05	39.2	38.96	21.82	31.06	30.27	4.059	2.64e-37	4.724	3.513e-44	4.818	6.35e-45	3.976	6.011e-25	3.934	2.998e-17	0.693739	0.1248	0.7621	0.04834	-0.141221	0.7589	-0.165007	0.9435	0.08479	1	-0.7656	0.05473	-0.8453	0.1762	-0.83149	0.03401	-0.9219	0.08873	0.0566595	0.9347
MVLG_02143	50.45	33.39	179.5	175.89	125.51	105.59	77.17	94.01	51.31	59.79	72.26	89.09	153.23	179.09	2.23	1.63e-16	1.548	2.065e-07	1.071	0.0004801	0.4368	0.2465	1.926	2.755e-06	-0.647587	0.1248	-1.156	0.0005933	-1.84975	2.556e-08	-0.341399	0.728	-0.4849	0.8396	-1.129	0.002447	0.3189	0.8179	-0.634931	0.1273	0.7973	0.2145	-1.47175	0.000614
MVLG_02956	19.13	12.68	26.94	30.39	46.43	56.43	70.84	49	73	61.22	68.35	54.61	44.17	45.72	0.9979	0.004002	1.79	1.37e-07	1.98	5.639e-10	1.972	2.295e-08	1.644	0.0002901	0.824982	0.1248	0.9831	0.02139	0.919901	0.03134	0.600488	0.5726	0.1731	1	0.1643	0.7922	-0.2035	0.937	0.0082462	0.9961	-0.369	0.7028	0.335331	0.6731
MVLG_05286	29.04	25.87	81.9	75.01	51.06	32.48	62.14	58.05	60.63	55.33	41.29	79.24	36.51	34.37	1.667	6.625e-07	0.6907	0.1359	1.199	0.0007405	0.8905	0.01431	0.6892	0.197	-0.938322	0.1248	-0.4651	0.4081	-0.832254	0.05243	-1.01915	0.3406	0.4952	0.9697	0.1824	0.8047	-0.05594	1	-0.300495	0.604	-0.548	0.6688	0.204917	0.9441
MVLG_05366	335.07	210.52	1128.15	1288.4	1863.43	1849.99	1879.72	1594.12	1466.11	1252.93	1155.2	1154.52	1040.64	1061.32	2.316	2.301e-18	2.884	3.04e-23	2.758	3.467e-20	2.262	1.029e-10	2.16	6.135e-08	0.602905	0.1248	0.4445	0.2465	-0.107461	0.8118	-0.192576	0.9105	-0.1379	1	-0.6386	0.1016	-0.7752	0.1836	-0.487124	0.2539	-0.6398	0.2592	0.113511	0.8863
MVLG_04727	151.8	117.19	42.98	51.57	23.44	32.3	43.67	44.35	51.47	81.04	87.25	41.46	36.02	54.48	-1.366	1.003e-06	-2.177	6.64e-12	-1.573	2.933e-07	-0.9921	0.002489	-1.515	0.000143	-0.77524	0.125	-0.2064	0.7204	0.313075	0.4983	-0.191912	0.9416	0.5899	0.7504	1.163	0.006209	0.6014	0.5096	0.581317	0.2075	0.01011	1	0.530373	0.3635
MVLG_01687	104.77	105.51	391.62	346.11	244.35	236.9	157.01	234.16	169.88	164.05	160.48	381.19	246.95	272.41	1.953	2.804e-13	1.281	1.487e-05	0.9356	0.002104	0.5604	0.1241	1.544	0.0001267	-0.635779	0.1255	-1.014	0.002947	-1.44544	1.745e-05	-0.44808	0.6669	-0.3538	0.9727	-0.7373	0.06284	0.2127	0.8693	-0.374677	0.4148	0.5586	0.402	-0.977883	0.02877
MVLG_01191	0.07	0	882.9	186.61	1186.39	483.99	705.95	880.99	39.29	66.25	142.39	704.84	1429.18	1936.37	13.65	1.002e-122	14.21	4.58e-117	14.14	6.746e-116	10.8	9.883e-60	14.93	4.858e-66	0.597156	0.1263	0.4969	0.1789	-2.95376	1.377e-19	1.3047	0.004687	-0.08244	1	-3.482	1.323e-24	0.7228	0.2633	-3.38678	4.223e-23	0.8079	0.1463	-4.24087	6.819e-26
MVLG_03769	214.81	153.12	590.78	676.66	1065.67	926.75	748.67	721.14	751.48	531.27	510.51	554.97	519.96	500.19	1.954	6.543e-13	2.55	3.298e-18	2.093	3.265e-12	1.745	4.759e-07	1.72	2.941e-05	0.629636	0.1266	0.1409	0.7981	-0.260136	0.5455	-0.272503	0.8524	-0.4683	0.8295	-0.8197	0.03242	-0.8841	0.1276	-0.336441	0.4734	-0.4177	0.5419	0.0401532	0.9623
MVLG_02347	0.2	0.06	283.45	337.42	193.77	203.39	116.59	165.53	8.86	18.37	24.8	299.28	237.73	392.98	11.2	1.117e-87	10.5	5.148e-62	9.958	3.272e-59	6.967	1.355e-28	11.15	1.217e-38	-0.662034	0.1267	-1.245	0.0002957	-4.32595	1.279e-34	-0.0486248	1	-0.5575	0.7504	-3.59	1.718e-22	0.6321	0.4163	-3.03019	7.969e-17	1.179	0.03144	-4.2631	1.372e-23
MVLG_06768	145.29	171.36	466.57	662.42	735.22	991.09	886.04	840.18	218.69	281.59	391.84	306.92	385.48	260.84	1.874	1.195e-12	2.443	1.283e-17	2.39	8.108e-16	0.7472	0.03554	1.04	0.01258	0.603218	0.1268	0.5144	0.1675	-1.18618	0.000473	-0.875963	0.1019	-0.06739	1	-1.713	5.062e-07	-1.461	0.001237	-1.6368	2.095e-06	-1.398	0.001572	-0.278015	0.6958
MVLG_06505	514.29	434.77	711.69	812.34	1185.71	1141.88	1528.19	1111.32	1055.27	1110.47	989.43	1087	783.54	603.28	0.8263	0.001691	1.381	7.83e-07	1.517	1.911e-07	1.036	0.002807	0.8273	0.03901	0.588313	0.1281	0.6918	0.04309	0.153237	0.7448	-0.0344519	1	0.124	1	-0.3627	0.3984	-0.5987	0.3737	-0.473897	0.2673	-0.7261	0.1841	0.215761	0.7633
MVLG_05785	91.97	75.05	130.17	146.66	220.41	248.81	182.73	194.14	167.84	87.52	80.46	109.04	48.01	61.82	0.8904	0.005027	1.604	4.705e-07	1.25	8.297e-05	0.3973	0.2854	-0.2832	0.768	0.747344	0.1287	0.3607	0.4863	-0.541879	0.2238	-1.21538	0.1527	-0.3659	0.9762	-1.22	0.002249	-1.936	0.001963	-0.839642	0.04622	-1.574	0.0155	0.690294	0.3886
MVLG_05288	141.9	139.84	64.69	64.37	113.94	98.86	134.97	140.39	399.14	290.71	288.9	193.96	89.5	60.18	-0.9882	0.0006008	-0.3265	0.3197	0.007085	0.9862	1.081	0.001824	-0.4786	0.3991	0.694476	0.1296	0.9965	0.005683	2.0188	4.866e-08	0.462809	0.6128	0.3228	0.9763	1.394	0.0003296	-0.196	0.9676	1.08445	0.006099	-0.5182	0.5687	1.54832	0.001087
MVLG_00633	85.59	72.12	36.14	36.35	23.85	17.75	13.19	13.23	22.85	25.07	22.57	14.54	34.14	49.71	-0.9817	0.0008325	-1.847	3.094e-08	-2.545	4.538e-14	-1.874	5.478e-09	-0.971	0.01132	-0.829123	0.13	-1.558	0.0001123	-0.949197	0.01406	-0.0299241	0.992	-0.7061	0.7622	-0.04563	0.9375	0.8112	0.4313	0.673417	0.1881	1.514	0.0157	-0.881401	0.1239
MVLG_02063	248.62	251.01	1.9	1.89	6.71	6.51	1.74	1.33	44.43	44.07	31.26	30.66	6.63	5.92	-6.904	2.262e-62	-5.162	3.792e-42	-7.257	2.726e-60	-2.788	2.642e-18	-4.864	3.637e-21	1.73134	0.1313	NA	NA	4.0568	1.651e-13	1.93607	0.08691	-2.066	0.1101	2.355	1.689e-06	0.242	0.8236	4.47575	2.184e-16	2.312	0.008634	2.06261	0.003184
MVLG_05623	88.05	96.69	21.43	29.84	15.9	9.89	9.77	10.79	42.1	24.47	28.21	41.66	16.3	18.54	-1.713	3.773e-08	-2.77	1.161e-13	-3.155	4.55e-18	-1.707	1.762e-07	-2.15	1.732e-05	-1.01911	0.1313	-1.437	0.004537	-0.0456038	0.9614	-0.48504	0.8744	-0.3917	1	1.052	0.04442	0.5624	0.5775	1.45696	0.002311	0.9516	0.2334	0.445011	0.72
MVLG_05956	113.27	80.5	368.5	335.7	171.45	268.28	118.33	223.96	70.67	155.98	142.82	114.27	236.41	579.21	2.023	2.247e-13	1.306	2.895e-05	0.8601	0.006432	0.3738	0.3424	2.04	1.259e-06	-0.678485	0.1313	-1.16	0.001323	-1.71116	3.945e-07	-0.0201257	0.9934	-0.4535	0.9199	-0.9575	0.01445	0.6692	0.4444	-0.506069	0.2399	1.103	0.06799	-1.64845	0.0001324
MVLG_06215	267.96	364.42	18.41	0	50.51	15.89	65.57	26.38	131.38	130.84	79.44	39.68	27.06	13.32	-4.92	5.432e-30	-3.184	6.628e-16	-2.583	1.328e-14	-1.456	8.184e-06	-3.565	3.272e-11	1.7261	0.1313	2.311	0.001281	3.40746	6.891e-10	NA	NA	0.5781	0.9892	1.711	0.0009298	-0.4331	0.9485	1.16232	0.007751	-0.9827	0.4205	2.12612	0.001139
MVLG_03277	14.2	11.78	27.74	30.43	64.48	36.31	103.19	52.99	30.42	44.51	46.54	14.56	43.65	29.11	1.303	3.461e-05	2.022	2.7e-10	2.64	1.955e-17	1.527	1.389e-05	1.47	0.001554	0.749251	0.1321	1.338	0.0002291	0.16445	0.7725	0.127209	1	0.6041	0.6615	-0.5137	0.2452	-0.6127	0.3737	-1.10045	0.003416	-1.21	0.01162	0.0786649	0.8558
MVLG_03156	15.46	22.23	242.73	207.67	105.44	163.43	38.76	85.57	11.87	16.86	21.45	230.51	191.41	155.32	3.723	7.601e-33	2.939	3.898e-16	1.672	7.623e-06	-0.1042	0.765	3.454	4.86e-14	-0.745887	0.1322	-2.049	1.882e-07	-3.88439	4.612e-26	-0.311355	0.8547	-1.268	0.08578	-3.065	3.412e-14	0.4532	0.6865	-1.80779	2.11e-05	1.685	0.004674	-3.55894	1.336e-15
MVLG_00866	124.31	103.29	410.41	407.81	299.76	249.5	226.17	256.97	177.17	151.76	194.49	227.3	355.21	375.36	1.988	3.695e-14	1.351	2.382e-06	1.13	0.0001412	0.4951	0.1772	1.621	4.842e-05	-0.602771	0.1323	-0.8544	0.01083	-1.54546	2.872e-06	-0.404853	0.6413	-0.2301	1	-0.8709	0.02065	0.213	0.8976	-0.628257	0.1239	0.4398	0.5528	-1.10903	0.01033
MVLG_05834	348.19	320.04	1839.87	2354.97	1222.6	1587.35	550.08	1004.07	73.86	98.73	160.59	363.41	753.55	729.09	2.798	6.01e-26	2.178	1.352e-14	1.278	1.386e-05	-1.623	3.681e-07	1.091	0.00802	-0.584245	0.1323	-1.518	4.691e-07	-4.4798	6.226e-40	-1.74683	4.169e-06	-0.9103	0.1005	-3.818	1.215e-28	-1.147	0.01276	-2.90202	2.227e-17	-0.2452	0.7078	-2.69939	7.401e-12
MVLG_00041	63.01	54.54	156.34	181.79	259.57	270.41	212.8	230.9	388.68	400.92	378.68	217.05	204.2	134.27	1.668	1.218e-09	2.263	1.27e-14	1.964	6.361e-11	2.629	1.228e-13	1.705	3.016e-05	0.628916	0.1326	0.2965	0.5188	0.904362	0.01669	-0.0036439	1	-0.3109	0.9762	0.3478	0.46	-0.6108	0.4114	0.670118	0.1181	-0.3037	0.7118	0.932268	0.04705
MVLG_00057	78.12	75.62	21.7	15.36	9.32	10.27	10.12	9.86	23.27	24.15	28.64	17.02	20.67	19.91	-1.92	1.1e-10	-2.892	1.721e-16	-2.914	6.379e-18	-1.74	5.745e-08	-1.869	6.201e-06	-0.932616	0.1326	-0.9882	0.04155	0.12667	0.8302	0.0079573	1	-0.03424	1	1.134	0.02019	0.9552	0.2922	1.17958	0.008705	0.9899	0.1912	0.142628	0.8696
MVLG_00676	0.04	0	239.48	268.07	136.51	191.23	78.48	148.56	7.26	9.18	22.06	121.5	218.41	260.57	13.15	1.28e-95	12.48	8.768e-70	11.89	9.215e-65	8.772	5.033e-30	12.76	2.157e-39	-0.637587	0.1327	-1.277	0.0001601	-4.53273	7.473e-38	-0.317462	0.743	-0.612	0.6534	-3.819	1.175e-25	0.3334	0.8082	-3.20847	8.726e-19	0.9284	0.1315	-4.19075	4.304e-23
MVLG_04562	87.79	84.92	37.9	45.9	26.08	22.35	37	30.98	55.87	55.3	51.15	73.49	38.79	44.64	-0.9051	0.002449	-1.757	2.147e-07	-1.296	4.664e-05	-0.8023	0.01751	-0.824	0.09319	-0.816575	0.1334	-0.3898	0.4441	0.0463409	0.9556	0.0337155	1	0.4465	0.9716	0.9372	0.0448	0.8772	0.2549	0.505058	0.3004	0.4377	0.5514	0.0199092	0.9841
MVLG_01145	54.48	36.44	122.75	138.09	93.15	74.14	103.84	83.06	81.38	59.33	82.25	162.25	121.31	64.52	1.669	1.296e-09	0.9648	0.002305	1.095	0.0004071	0.5928	0.1033	1.31	0.001576	-0.670412	0.1393	-0.5711	0.1475	-1.12884	0.001441	-0.39942	0.7883	0.1187	1	-0.386	0.4088	0.2963	0.7877	-0.489409	0.2785	0.181	0.8347	-0.718054	0.1466
MVLG_01983	21.49	17.77	50.31	35.48	28.23	22.56	16.64	28.95	20.19	26.05	26.53	37.97	78.89	90.98	1.266	2.138e-05	0.4492	0.2355	0.1993	0.5523	0.1936	0.6497	2.044	1.526e-06	-0.779019	0.1417	-1.063	0.01208	-1.1277	0.002513	0.740099	0.4148	-0.2526	1	-0.2748	0.6008	1.53	0.01006	-0.02466	0.9385	1.759	0.001264	-1.83105	2.243e-05
MVLG_07093	81.91	67.43	181.29	63.61	191.15	184.16	291.54	296.01	457.44	901.06	641.66	74.18	91.38	116.02	0.8472	0.001919	1.413	7.861e-07	2.017	7.692e-12	3.036	3.144e-17	0.4616	0.336	0.60675	0.1424	1.181	0.0002103	2.13434	2.474e-09	-0.419543	0.6432	0.593	0.5771	1.6	1.799e-05	-1.008	0.0528	1.0179	0.009344	-1.604	0.0001986	2.5916	3.348e-11
MVLG_00657	269.74	399.38	31.8	46.77	46.86	95.71	96.99	118.52	230.55	108.29	269.02	168.79	113.8	218.97	-2.957	3.044e-21	-2.13	3.284e-11	-1.604	2.723e-07	-0.816	0.01534	-0.887	0.0316	0.857728	0.1438	1.348	0.001177	2.09181	2.04e-07	2.01703	0.0001084	0.5112	0.8798	1.302	0.001974	1.178	0.06944	0.798158	0.06588	0.6614	0.3432	0.0841912	0.9286
MVLG_06507	652.31	464.12	1084.15	1130.72	1757.88	1606.67	1656.8	1578.84	2055.64	1150.91	1279.65	1673.53	921.99	873.82	1.151	1.176e-05	1.697	1.649e-09	1.613	3.608e-08	1.401	4.765e-05	1.109	0.004983	0.58105	0.1445	0.4653	0.2197	0.202839	0.6538	-0.0773524	1	-0.09524	1	-0.3086	0.4898	-0.6322	0.3623	-0.19796	0.6931	-0.5397	0.3976	0.296614	0.6615
MVLG_07013	25.24	21.01	54.47	49.67	32.08	35.19	25.76	33.07	37	76.19	51.76	67.16	71.33	60.49	1.307	1.425e-06	0.6241	0.04631	0.3726	0.2491	1.112	0.001402	1.571	0.0001017	-0.646219	0.1449	-0.9309	0.008805	-0.256658	0.5428	0.225563	0.9045	-0.2611	1	0.4639	0.3143	0.8916	0.1633	0.731672	0.09236	1.145	0.03218	-0.448564	0.4323
MVLG_01438	120.05	102.49	231.24	212.51	148.01	152.69	121.67	136.9	77.99	67.44	95.17	163.09	140.91	161.06	1.131	1.396e-05	0.5161	0.08083	0.2524	0.4342	-0.6309	0.06534	0.5189	0.2248	-0.57879	0.1454	-0.8748	0.007605	-1.81396	2.337e-08	-0.648711	0.3223	-0.2748	0.9804	-1.162	0.00112	-0.04759	0.9994	-0.875712	0.02091	0.223	0.8023	-1.14083	0.006781
MVLG_01804	15.93	13.47	41.44	45.69	36.01	19.95	29.32	25.79	20.86	22.73	23.14	27.36	48.46	42.32	1.705	1.203e-09	0.993	0.002338	0.9457	0.002989	0.4543	0.2291	1.593	0.0001848	-0.679932	0.1455	-0.7573	0.0493	-1.30796	0.0002079	-0.151994	0.9277	-0.05631	1	-0.5552	0.2135	0.5404	0.6021	-0.484348	0.2907	0.5972	0.4409	-1.11869	0.01868
MVLG_05234	28.48	19.03	10.86	13.68	5.17	5.51	7.03	6.85	22.14	13.28	11.34	6.55	23.28	16.13	-0.8063	0.02477	-2.063	2.935e-06	-1.736	4.089e-06	-0.7899	0.02638	-0.2551	0.4962	-1.21155	0.1455	-0.9232	0.1172	-0.0359788	0.984	0.507919	0.8478	0.3127	1	1.258	0.03075	1.725	0.05819	0.95681	0.06052	1.416	0.05912	-0.49895	0.6106
MVLG_00337	305.22	331.55	92.14	80.35	134.33	176.89	154.05	178.7	176.72	182.67	181.05	153.32	126.68	142.28	-1.727	3.631e-08	-0.9205	0.005596	-0.8729	0.007317	-0.794	0.01877	-1	0.02329	0.839225	0.1456	0.8538	0.05964	0.878243	0.04449	0.679722	0.5203	0.03519	1	0.1076	0.8822	-0.1406	0.9636	0.0807114	0.9214	-0.1813	0.8783	0.217983	0.7967
MVLG_01744	69.3	53.2	29.46	27.51	73.27	30.7	141.48	96.64	159.75	425.44	207.02	22.41	61.92	53.94	-0.9595	0.003259	-0.1714	0.6345	1.014	0.0009767	2.023	6.436e-09	-0.08692	0.7487	0.817258	0.1457	1.974	3.983e-08	2.91607	1.106e-13	0.830549	0.4399	1.175	0.03602	2.17	3.654e-08	0.02477	0.9994	1.00899	0.01142	-1.146	0.0192	2.1341	1.449e-07
MVLG_02608	144.05	159.82	105.91	78.79	200.85	134.14	215.81	199.88	67.49	80.46	52.94	79.36	51.09	30.84	-0.5465	0.1141	0.2289	0.5454	0.5352	0.1053	-1.136	0.0006805	-1.507	0.00442	0.806543	0.1457	1.083	0.009088	-0.64695	0.1511	-0.998606	0.3619	0.2951	1	-1.385	0.0007596	-1.785	0.01174	-1.66681	8.31e-06	-2.082	0.0005463	0.380588	0.7537
MVLG_05860	2.86	2.3	26.81	29.26	120.96	34.87	62.96	52.81	26.73	35.79	40.57	0	28.04	43.73	3.587	6.627e-05	4.977	8.279e-12	4.614	5.077e-16	3.954	2.526e-17	4.019	0.0004932	1.39933	0.1457	1.016	0.2383	0.299218	0.7914	NA	NA	-0.3717	1	-1.048	0.07793	-0.9909	0.3554	-0.659638	0.2457	-0.6192	0.503	-0.0794937	0.9159
MVLG_05674	41.07	34.97	88.81	83.95	60.09	42.99	30.5	48.83	35.92	59.15	61.2	47.47	70.12	58.87	1.33	8.269e-06	0.5198	0.1708	0.05688	0.8435	0.4023	0.3048	0.8532	0.08373	-0.774216	0.1462	-1.271	0.002153	-0.986861	0.008588	-0.516319	0.6034	-0.4655	0.9762	-0.1377	0.8047	0.2722	0.9188	0.326443	0.6187	0.7164	0.4191	-0.439803	0.5474
MVLG_02576	46.06	52.06	27.81	31.89	40.35	58.41	87.81	74.44	112.39	210.32	117.52	93.85	44.21	24.28	-0.5846	0.05974	0.09679	0.7976	0.7599	0.01392	1.45	2.737e-05	-0.1044	0.9926	0.715137	0.1491	1.344	0.0001313	1.97081	1.694e-07	0.430239	0.6492	0.6471	0.5763	1.328	0.0008014	-0.2489	0.9505	0.69159	0.1061	-0.8931	0.2196	1.54039	0.001979
MVLG_02513	13.15	16.14	4.88	5.65	9.69	16.67	12.23	25.57	35.3	44	45.47	9.87	16.18	22.63	-1.342	0.006095	-0.06533	0.9325	0.3014	0.3859	1.392	7.997e-05	0.4148	0.5675	1.29342	0.1495	1.627	0.004415	2.67508	6.201e-08	1.68761	0.06113	0.3606	1	1.436	0.00355	0.4107	0.8846	1.06374	0.0275	0.01914	0.9981	0.988531	0.07236
MVLG_01259	84.61	83.06	39.11	45.01	27.97	19.3	8.69	15.8	46.36	39.96	38.32	48.93	45.7	57.06	-0.8553	0.00601	-1.752	1.039e-06	-2.849	4.118e-14	-1.132	0.0006545	-0.6147	0.1824	-0.860257	0.1503	-1.988	2.487e-05	-0.331513	0.4806	0.195198	0.9655	-1.094	0.5184	0.6044	0.2611	1.074	0.1915	1.69931	0.0004504	2.139	0.0007436	-0.503024	0.4396
MVLG_02492	6.66	5.24	8.34	11.1	21.41	14.95	24.18	23.08	21.74	33.25	28.28	30.05	23.07	5.88	0.8487	0.02433	1.684	2.706e-06	2.026	4.278e-10	2.095	3.779e-09	1.572	0.0006249	0.864224	0.1503	1.175	0.006694	1.18489	0.006243	0.675674	0.497	0.3312	0.9831	0.3905	0.4732	-0.1662	0.9967	0.0701074	0.9316	-0.4975	0.6102	0.523467	0.5115
MVLG_00062	155.43	86.03	464.56	581.72	749.78	821.36	871.16	768.71	716.52	750.69	766.19	890.19	629.79	543.52	2.268	6.259e-18	2.802	1.622e-22	2.815	5.316e-21	2.514	1.012e-12	2.547	1.363e-10	0.568548	0.1505	0.5487	0.1293	0.188314	0.681	0.244901	0.8744	0.001207	1	-0.3064	0.4899	-0.2991	0.7632	-0.2961	0.5271	-0.3047	0.6817	-0.0289499	0.9773
MVLG_03270	137.67	107.99	70.84	72.11	94.44	128.57	142.13	177.8	235.82	484.8	325.42	134.75	89.06	74.43	-0.6391	0.02523	-0.0424	0.9166	0.4231	0.1763	1.393	5.371e-05	-0.3426	0.5099	0.632836	0.1509	1.065	0.001733	1.96894	6.506e-08	0.254833	0.8737	0.4533	0.859	1.411	0.0002244	-0.3498	0.7754	0.96497	0.01586	-0.8077	0.1841	1.73507	5.668e-05
MVLG_01353	35.19	28.97	2.25	0.74	6.42	2.88	10.97	6.27	37.01	29.6	28.29	9.01	8.26	2.36	-4.287	4.898e-24	-2.717	2.939e-12	-1.802	3.809e-08	-0.1822	0.6376	-2.345	1.585e-06	1.57273	0.1546	2.466	6.422e-05	4.05125	2.64e-15	1.861	0.09644	0.8944	0.6605	2.52	7.929e-08	0.3079	0.9205	1.64653	5.723e-05	-0.5671	0.6061	2.17989	5.289e-05
MVLG_05947	48.14	33.44	3.26	2.29	0.61	1.19	0.74	0.48	40.82	20.89	36.29	16.68	10.08	4.03	-3.74	1.116e-27	-5.408	1.531e-33	-5.927	4.248e-42	-0.4949	0.1625	-2.227	1.023e-06	-1.59999	0.1546	-2.148	0.004659	3.19866	1.316e-13	1.45841	0.04445	NA	NA	4.898	1.614e-19	3.071	0.0001081	5.4501	3.389e-25	3.618	1.798e-07	1.73091	0.00101
MVLG_01007	76.48	74.24	429.32	351.98	251.28	264.45	163.09	208.72	92.12	69.25	58.31	205.92	144.88	264.94	2.539	1.467e-20	1.887	2.674e-10	1.368	8.024e-06	-0.1096	0.7974	1.592	0.0001404	-0.614654	0.1558	-1.167	0.0005561	-2.69894	7.742e-16	-0.987104	0.07177	-0.5292	0.7668	-2.012	1.779e-08	-0.3513	0.7281	-1.4724	6.463e-05	0.1711	0.8816	-1.68378	0.0001055
MVLG_03346	104.27	63.9	227.83	254.74	163.91	163.64	193.44	171.24	111.05	125.1	135.97	234.73	223.84	144.84	1.668	1.822e-10	1.052	0.0002634	1.161	8.69e-05	0.4311	0.2464	1.29	0.001153	-0.580768	0.1558	-0.5039	0.1774	-1.29374	0.0001138	-0.413639	0.6769	0.09746	1	-0.6394	0.1047	0.1895	0.8913	-0.725151	0.06527	0.08952	0.9485	-0.854106	0.05943
MVLG_02804	53.75	73.73	24.26	9.64	36.41	26.96	29.14	39.85	65.95	54.4	68.41	9.81	32.2	17.52	-1.785	5.773e-08	-0.9429	0.006189	-0.8835	0.009203	-0.1556	0.689	-1.313	0.001326	0.872756	0.157	0.9008	0.05873	1.58016	0.000166	0.428244	0.9232	0.05239	1	0.7737	0.09588	-0.4345	0.6325	0.72642	0.122	-0.502	0.4494	1.18602	0.01044
MVLG_06442	207.74	246.87	411.31	331.58	202.33	277.34	186.28	190.66	53.72	89.53	76.51	132.69	279.31	382.8	0.8539	0.001903	0.1805	0.5993	-0.2144	0.5432	-1.637	3.249e-07	0.5343	0.2961	-0.635378	0.1574	-1.065	0.002243	-2.54956	2.57e-14	-0.358741	0.6733	-0.4087	0.9335	-1.84	3.817e-07	0.2882	0.8856	-1.42305	0.0001102	0.6918	0.3373	-2.1501	2.812e-07
MVLG_01036	97.1	143.37	8.68	9.94	19.83	25.48	21.47	48.32	42.78	37.94	54.39	60.89	15.86	26.5	-3.559	6.5e-21	-2.327	2.265e-10	-1.846	1.08e-07	-1.516	2.989e-06	-2.221	2.505e-05	1.25085	0.1576	1.697	0.00168	1.98715	8.136e-05	1.26712	0.1941	0.4764	0.9606	0.7941	0.1434	0.04973	0.9474	0.305168	0.6686	-0.456	0.8008	0.691361	0.5328
MVLG_06807	0.21	0.05	624.65	730.5	426.44	500.01	285.56	319.05	49.09	80.67	123.93	300.2	713.85	538.5	12.44	3.24e-141	11.84	1.326e-111	11.18	4.726e-101	9.205	2.114e-65	12.01	6.164e-58	-0.562892	0.1576	-1.261	4.228e-05	-3.30699	3.223e-24	-0.450156	0.5539	-0.6763	0.4226	-2.667	1.643e-15	0.1296	0.961	-1.98342	6.048e-09	0.8014	0.1615	-2.82626	3.417e-13
MVLG_07108	86.02	99.68	38.15	40.12	23.24	24.37	24.1	17.46	39.3	45.47	50.87	35.63	70.44	72.34	-1.115	7.482e-05	-1.872	3.361e-09	-2.108	1.684e-11	-1.177	0.0002962	-0.4581	0.2288	-0.722005	0.1576	-0.99	0.009619	-0.118673	0.7995	0.615585	0.5366	-0.251	1	0.6773	0.1439	1.348	0.02542	0.944896	0.02599	1.605	0.002112	-0.695461	0.2101
MVLG_02180	295.75	243	540.02	626.6	841.06	924.16	794.22	743.4	773.23	919.25	802.57	703.66	813.74	824.65	1.272	1.934e-06	1.822	1.786e-10	1.587	7.731e-08	1.625	2.547e-06	1.722	1.681e-05	0.58476	0.158	0.3169	0.468	0.295161	0.501	0.411072	0.7272	-0.2473	0.9957	-0.2161	0.648	-0.1556	0.9059	0.0426552	0.9542	0.08844	0.9694	-0.0816897	0.9397
MVLG_05130	561.77	548.84	1028.42	1211.58	1629.02	1741.29	1587.47	1256.12	1030.28	819.62	929.55	697.64	823.52	980.9	1.174	1.005e-05	1.72	1.385e-09	1.452	8.427e-07	0.8121	0.02115	0.8715	0.04146	0.580717	0.1584	0.2784	0.5354	-0.414566	0.2912	-0.342288	0.7305	-0.2823	0.9799	-0.9227	0.0128	-0.9069	0.08798	-0.627157	0.1246	-0.6267	0.2592	-0.0389771	1
MVLG_03242	39.22	29.88	20.04	21.87	3.8	14.69	5.22	4.01	5.05	4.35	4.29	46.5	26.3	24.98	-0.5756	0.1241	-1.792	5.619e-05	-2.808	4.305e-11	-3.043	4.689e-18	-0.2051	0.8432	-1.17069	0.1587	-2.211	6.965e-05	-2.52652	4.174e-08	0.322446	0.8834	-1.019	0.859	-1.274	0.07954	1.51	0.08909	-0.227004	0.8565	2.543	0.0001681	-2.83175	6.329e-08
MVLG_02165	3.67	0.94	1251.31	1107.01	752.13	855.99	316.22	601.3	53.29	112.53	162.21	412.4	1415.83	1497.2	9.158	1.385e-134	8.557	1.352e-105	7.703	1.408e-84	5.543	1.279e-38	9.112	3.943e-59	-0.563573	0.1591	-1.45	2.248e-06	-3.67969	8.409e-29	-0.0845798	0.977	-0.8625	0.1579	-3.039	2.418e-19	0.4949	0.5458	-2.17205	1.924e-10	1.35	0.005472	-3.56554	1.697e-19
MVLG_06096	38.8	22.73	92.92	132.05	71.14	71.39	32.54	37.51	167.64	143.08	131.03	89.75	123.09	101.55	2.026	1.033e-12	1.314	6.373e-05	0.2292	0.5367	2.162	8.099e-10	1.938	5.032e-06	-0.677634	0.1591	-1.795	5.963e-07	0.0798294	0.8875	-0.126984	0.9561	-1.092	0.1266	0.8299	0.05473	0.5647	0.5412	1.93314	1.841e-06	1.648	0.002594	0.240518	0.7094
MVLG_06396	50.07	44.25	192.98	194.89	121.89	132.73	75.83	94.15	40.76	38.63	34.56	117.27	183.85	157.11	2.182	1.616e-15	1.523	5.819e-07	0.8849	0.005038	-0.4187	0.252	1.869	7.031e-06	-0.623567	0.1591	-1.295	0.0001376	-2.65654	3.449e-15	-0.351911	0.7283	-0.6478	0.6018	-1.96	6.553e-08	0.2857	0.8547	-1.30341	0.0006	0.9244	0.1341	-2.26659	4.589e-08
MVLG_04821	135.93	283.84	13.62	9.77	13.02	32.98	21.4	38.06	99.13	64.28	126.88	82.54	32.82	43.39	-4.048	1.078e-34	-3.106	7.628e-21	-2.852	3.093e-18	-1.269	9.102e-05	-2.19	4.298e-07	0.972117	0.1597	1.189	0.01201	2.73033	8.316e-11	1.79682	0.0017	0.2429	1	1.822	1.683e-05	0.8543	0.2619	1.57606	0.0001441	0.5941	0.4155	0.914394	0.1323
MVLG_05791	85.32	108.4	64.69	59.96	32.89	42.05	27.48	31.61	40.74	45.41	40.56	96.98	93.33	109.41	-0.505	0.09575	-1.287	0.00011	-1.697	2.551e-07	-1.316	5.316e-05	0.1401	0.8217	-0.745915	0.1603	-1.189	0.002772	-0.867079	0.02456	0.601148	0.5158	-0.42	0.9762	-0.04804	0.931	1.364	0.02565	0.379953	0.497	1.777	0.0008155	-1.4417	0.001192
MVLG_02559	71.6	67.27	94.86	114.3	146.93	178.74	140.57	131.81	102.29	143.14	120.33	84.34	119	63.85	0.7317	0.01096	1.322	8.499e-06	1.017	0.000868	0.7141	0.04621	0.4913	0.3217	0.624708	0.1607	0.2854	0.5595	-0.0776857	0.8683	-0.281422	0.8452	-0.319	0.9762	-0.6289	0.1215	-0.8902	0.138	-0.29923	0.5331	-0.5746	0.3678	0.239356	0.7209
MVLG_02283	490.79	361.73	28.67	13.74	61.47	22.41	78.96	32.82	348.34	200.37	210.67	76.53	75.43	38.05	-4.179	9.172e-38	-3.277	1.469e-23	-2.818	1.162e-19	-0.8584	0.01027	-2.697	3.249e-11	0.931111	0.1611	1.365	0.003615	3.27548	2.913e-15	1.43491	0.04026	0.4424	0.9762	2.408	4.156e-09	0.5241	0.628	1.99611	2.08e-07	0.1048	0.938	1.85214	5.073e-05
MVLG_00211	4.57	4.52	22.64	38.13	3.87	14.64	11.58	18.2	24.65	16.34	14.63	0	6.86	4.12	2.885	1.206e-06	1.149	0.3	1.667	0.00922	1.965	1.153e-06	0.5367	1	-1.66371	0.1617	-1.205	0.1642	-0.980055	0.1218	-2.31303	0.04079	0.4962	1	0.7943	0.4135	NA	NA	0.290589	0.8022	NA	NA	1.45009	0.1065
MVLG_03576	21.18	23.72	34.74	54.62	131.86	41.84	83.27	74.06	30.27	33.49	23.57	0	41.88	30.82	1.137	0.005124	2.012	1.585e-07	1.88	5.8e-08	0.3624	0.3793	0.8224	0.4205	0.899972	0.1627	0.7406	0.1764	-0.836078	0.09317	-0.356538	0.7307	-0.1392	1	-1.666	0.0001554	-1.242	0.03393	-1.51194	0.0002244	-1.104	0.03424	-0.435985	0.9349
MVLG_02923	99.79	96.84	32.82	26.33	60.46	43.27	53.22	58.37	30.2	31.61	27.2	11.1	37.75	26.72	-1.595	2.59e-07	-0.8491	0.009705	-0.7834	0.01584	-1.841	1.17e-08	-1.581	7.498e-05	0.776977	0.1631	0.8121	0.06723	-0.301996	0.5418	-0.0267707	0.9926	0.05685	1	-1.01	0.01653	-0.7928	0.2293	-1.05634	0.00794	-0.8564	0.1296	-0.234946	0.9007
MVLG_07083	308.44	339.68	91.27	112.5	129.91	198.11	88.84	174.46	151.98	206.86	183.79	111.56	62.88	134.37	-1.526	1.214e-07	-0.8778	0.004799	-1.282	5.489e-05	-0.8867	0.007578	-1.566	0.0001956	0.682564	0.1633	0.2421	0.6342	0.580048	0.1763	-0.0864098	1	-0.4117	0.9652	-0.02987	0.9568	-0.7447	0.3623	0.381093	0.4782	-0.3512	0.6858	0.684008	0.2437
MVLG_03665	51.45	46.25	48.8	63.53	101.35	102.83	248.85	159.21	77.34	111.09	89.46	32.74	60.7	37.69	0.3558	0.3771	1.167	0.001543	2.157	8.002e-12	0.9491	0.008456	0.2322	0.8206	0.8405	0.1635	1.799	5.828e-06	0.532063	0.2912	-0.166166	0.9665	0.9725	0.2193	-0.2397	0.6577	-0.9935	0.181	-1.19696	0.001756	-1.96	0.0002211	0.733004	0.2114
MVLG_03295	211.8	136.48	641.16	846.48	1190.91	1073.82	1151.11	906.98	800.73	572.65	371.84	577.69	443.7	312.66	2.268	1.034e-16	2.823	1.325e-21	2.67	1.394e-18	1.81	1.841e-07	1.492	0.000345	0.588234	0.1636	0.4032	0.3331	-0.510205	0.191	-0.815706	0.2214	-0.1653	1	-1.029	0.005413	-1.383	0.006183	-0.846875	0.02856	-1.217	0.01556	0.329112	0.6348
MVLG_02941	97.64	94.78	17.07	11.39	25.75	33.61	28.02	64.66	37.41	27.5	32.67	55.75	12.66	33.12	-2.616	1.302e-13	-1.605	6.169e-06	-1.084	0.001815	-1.681	2.723e-07	-1.849	0.0004818	1.03842	0.164	1.524	0.0009297	0.882572	0.08716	0.709156	0.5001	0.5168	0.8904	-0.09276	0.8981	-0.2946	0.9994	-0.617632	0.1731	-0.837	0.4295	0.155214	1
MVLG_03288	60.56	51.42	314.58	304.29	211.34	207.84	135.51	206.6	48.17	61.72	68.48	243.62	189.68	254.31	2.608	4.084e-22	1.991	8.835e-12	1.652	3.465e-08	-0.01288	0.9625	2.103	1.848e-07	-0.581988	0.164	-0.9532	0.004659	-2.6781	3.354e-16	-0.543739	0.4915	-0.3474	0.9719	-2.022	5.201e-09	0.05978	0.9994	-1.66725	2.095e-06	0.3998	0.5922	-2.10917	1.498e-07
MVLG_07089	633.43	513.8	1379.7	1731.36	2602.37	2079.02	1534.77	1903.61	1723.66	1215.62	1364.91	1344.51	1376.17	1129.87	1.609	1.468e-09	2.154	6.652e-14	1.706	8.154e-09	1.511	1.207e-05	1.473	0.0002831	0.577499	0.164	0.09916	0.8629	-0.14913	0.7406	-0.175202	0.9207	-0.4566	0.8469	-0.6565	0.09487	-0.7368	0.2174	-0.185961	0.7155	-0.2841	0.6882	0.0560723	0.937
MVLG_05543	0.34	0.22	263.25	244.49	162.35	171.09	130.61	148.24	74.19	116.67	89.41	126.49	152.2	179.66	9.921	1.665e-86	9.262	1.031e-61	8.96	2.449e-63	8.292	1.541e-55	9.214	1.063e-31	-0.623158	0.1643	-0.96	0.007084	-1.70199	4.396e-07	-0.730454	0.2526	-0.3146	0.9799	-1.005	0.009307	-0.09133	0.9572	-0.68208	0.09867	0.2175	0.8622	-0.936392	0.05733
MVLG_01976	103.1	98	285.49	226.62	178.32	161.7	120.06	149.08	110.89	100.28	109.79	223.44	186.62	282.84	1.491	3.233e-08	0.8427	0.006058	0.4614	0.149	-0.001203	0.9922	1.318	0.001372	-0.612418	0.1659	-1.026	0.003159	-1.54441	5.251e-06	-0.212479	0.9039	-0.3902	0.9578	-0.8599	0.02924	0.4194	0.6671	-0.459726	0.3065	0.8032	0.1914	-1.30541	0.002668
MVLG_03309	317.84	154.79	1415.92	2010.42	2648.1	2426.13	1467.87	1816.86	1288.93	847	893.11	1407.34	951.81	838.84	3.04	7.885e-28	3.582	2.533e-32	2.947	1.03e-21	2.346	3.059e-11	2.434	4.039e-09	0.575486	0.1667	-0.09053	0.8899	-0.745524	0.0418	-0.643842	0.3814	-0.6439	0.5143	-1.25	0.0004703	-1.199	0.01894	-0.592837	0.1544	-0.5589	0.3847	-0.0781358	0.9345
MVLG_04049	61.38	45.94	2.73	0.73	5.22	3.18	9.98	4.4	46.57	34.7	37.6	35.62	6.8	3.13	-4.821	4.368e-39	-3.603	7.043e-24	-2.793	1.803e-18	-0.6057	0.08002	-2.626	5.193e-07	1.23692	0.1671	2.022	0.0002304	4.16539	2.337e-19	2.11785	0.001366	0.7887	0.7189	2.984	1.274e-11	0.9378	0.1679	2.22165	1.589e-08	0.1858	0.6485	1.96834	0.001672
MVLG_00985	3.8	5.04	2061.3	2458.34	1150.29	1906.73	911.03	1310.27	137.87	218.75	294.65	1367.01	1761.9	2685.18	9.138	4.92e-134	8.546	4.074e-105	8.032	2.315e-90	5.628	1.949e-39	8.972	1.644e-58	-0.554268	0.1673	-1.105	0.0004587	-3.57058	2.393e-27	-0.205528	0.8876	-0.5275	0.7008	-2.937	3.249e-18	0.3695	0.702	-2.40485	1.391e-12	0.8896	0.1036	-3.33514	1.844e-17
MVLG_01459	5.71	6.25	14.78	16.86	44.15	10.31	59.47	31.18	26.93	40.14	34.5	12.07	18.33	12.65	1.534	1.346e-06	2.224	8.312e-12	2.961	3.959e-21	2.356	3.484e-11	1.416	0.002755	0.716534	0.1673	1.427	6.036e-05	0.761836	0.07058	-0.160899	0.9622	0.7278	0.4528	0.1154	0.8458	-0.863	0.2144	-0.592723	0.1628	-1.582	0.001286	0.957181	0.05449
MVLG_03162	46.65	44.91	356.19	274.1	220.51	210.82	117.39	186.31	38.63	41.27	62.41	185.32	291.21	433.95	2.918	3.869e-27	2.316	1.216e-15	1.766	2.769e-09	-0.07344	0.8464	2.859	1.875e-12	-0.565439	0.1673	-1.146	0.0003534	-3.04402	1.597e-20	-0.0973289	0.9727	-0.5579	0.6669	-2.405	1.622e-12	0.4845	0.5681	-1.83873	1.194e-07	1.035	0.05284	-2.91715	1.115e-13
MVLG_04141	9.54	5.96	1.7	3.38	10.15	6.55	16.3	10.71	67.79	77.98	51.03	0	14.71	9.2	-1.454	0.02885	0.1911	0.7817	0.9044	0.02733	2.973	5.037e-16	0.6847	0.6326	1.63634	0.1673	2.33	0.001908	4.36501	5.434e-16	2.04421	0.2405	0.693	0.954	2.761	1.53e-08	0.4232	1	2.08486	6.908e-07	-0.2537	0.6363	2.31041	1.523e-07
MVLG_04207	62.45	60.27	42.48	42.93	27	26.23	20.07	19.32	31.78	20.99	27.77	24.05	44.61	43.71	-0.3879	0.2003	-1.127	0.0005243	-1.606	5.764e-07	-1.355	3.422e-05	-0.5034	0.2052	-0.703389	0.1673	-1.215	0.001406	-1.01803	0.006586	-0.15599	0.9331	-0.4906	0.8991	-0.2419	0.6585	0.5593	0.6134	0.262596	0.6422	1.047	0.1095	-0.82609	0.1352
MVLG_05957	367.81	1463.5	28	47.19	9.99	182.06	53.39	239.08	442.9	232.67	596.07	589.85	295.2	320.32	-4.508	9.643e-30	-3.094	6.863e-17	-2.789	2.059e-14	-0.9278	0.005535	-1.078	0.01567	1.42332	0.1673	1.69	0.004051	3.52863	1.825e-12	3.33847	3.433e-07	0.3018	0.995	2.151	3.622e-06	1.932	0.004711	1.81924	7.743e-05	1.574	0.01713	0.16226	0.8911
MVLG_06038	87.21	75.53	2.65	0.98	6.09	3.38	8.3	2.76	84.47	82.46	89.72	51.49	11.36	13.5	-5.357	7.476e-45	-4.034	1.71e-28	-3.718	8.086e-29	-0.08266	0.8318	-2.166	5.788e-06	1.33729	0.1673	1.632	0.02004	5.2208	1.19e-27	3.10566	4.016e-07	0.2929	1	3.935	1.483e-18	1.82	0.003719	3.67549	6.321e-19	1.573	0.003051	2.04463	0.0001047
MVLG_06311	3.21	2.75	66.37	62.74	115.91	83.47	115.93	84.38	27.96	55.53	53.72	41.18	66.38	55.61	4.572	1.444e-50	5.132	6.394e-54	5.105	1.217e-50	3.814	9.403e-24	4.325	1.254e-21	0.59299	0.1673	0.5355	0.1665	-0.819541	0.02367	-0.284762	0.8204	-0.03849	1	-1.34	0.0001639	-0.8645	0.1257	-1.28904	0.0003155	-0.8253	0.1134	-0.496859	0.4103
MVLG_00170	25.69	21.21	118.26	152.74	186.55	224.45	294.59	254.97	183.09	300.37	217.99	101.05	157.12	113.94	2.673	7.069e-22	3.224	1.005e-26	3.593	1.775e-30	3.207	1.355e-18	2.542	9.603e-10	0.585652	0.1682	0.9204	0.006342	0.471204	0.2504	-0.170977	0.9214	0.3552	0.9578	-0.0399	0.9391	-0.7409	0.2157	-0.384808	0.3928	-1.1	0.02	0.6831	0.1495
MVLG_06725	24.73	20.04	48.76	65.75	105.31	80.95	110.73	116.46	96.55	99.73	88.45	104.84	63.4	92.77	1.499	7.709e-07	2.136	9.716e-12	2.387	1.274e-14	1.976	1.875e-08	1.971	3.876e-06	0.667754	0.1683	0.8879	0.02038	0.418847	0.3493	0.427007	0.7275	0.2418	1	-0.1781	0.7328	-0.2164	0.9163	-0.407732	0.3748	-0.4592	0.5747	0.0076654	1
MVLG_02807	41.17	34.11	17.83	13.71	10.22	8.29	13.02	9.8	30.38	19.58	21.96	27.17	15.7	12.22	-1.12	0.0001732	-1.947	1.285e-08	-1.667	1.896e-07	-0.826	0.015	-1.195	0.01183	-0.789936	0.1692	-0.5413	0.2636	0.245256	0.6205	-0.119719	1	0.2662	1	1.108	0.01525	0.6968	0.4391	0.860488	0.04856	0.4412	0.5367	0.369714	0.6993
MVLG_04533	72.32	56.05	30.36	30.75	22.03	13.83	24.62	26.84	97.9	140.78	88.97	48.94	39.9	16.78	-0.9284	0.002425	-1.765	4.193e-07	-1.288	8.659e-05	0.6482	0.07204	-0.9369	0.0477	-0.799841	0.1697	-0.3576	0.5381	1.51687	8.726e-05	-0.0515541	1	0.4668	0.9544	2.392	1.338e-08	0.7694	0.3737	1.93337	1.398e-06	0.2992	0.7425	1.5908	0.001199
MVLG_02012	3.73	18.86	11.85	9.05	12.07	26.2	32.92	43.9	42.87	49.53	65.94	32.43	29.18	26.04	-0.01281	0.9593	0.8256	0.03381	1.755	3.324e-08	2.058	5.472e-09	1.377	0.002609	0.868592	0.1698	1.761	9.911e-06	2.01698	1.197e-06	1.33303	0.05598	0.9129	0.299	1.215	0.00549	0.4821	0.6865	0.305625	0.5801	-0.438	0.5882	0.695851	0.2368
MVLG_04867	148.92	109.81	714.01	921.19	1336.18	1123.54	668.52	993.83	138.87	166.59	196.86	430.62	509.48	578.73	2.821	4.859e-25	3.352	2.143e-29	2.762	9.763e-20	0.3959	0.3008	2.197	7.944e-08	0.562899	0.1717	-0.0582	0.9467	-2.48393	4.018e-14	-0.66249	0.3035	-0.5983	0.5763	-2.974	2.164e-18	-1.21	0.01129	-2.3658	4.935e-12	-0.6176	0.2768	-1.78781	1.524e-05
MVLG_02585	19.08	13.89	60.46	88.42	147.79	97.07	141.8	71.66	133.06	180.18	157.87	77.38	72.98	51.9	2.324	7.383e-14	2.972	3.371e-20	2.774	4.847e-18	3.178	4.605e-18	2.104	3.123e-06	0.677918	0.1728	0.4511	0.3604	0.793172	0.05205	-0.263421	0.9177	-0.2124	1	0.1867	0.7433	-0.9227	0.1859	0.420195	0.371	-0.6979	0.3241	1.08312	0.03186
MVLG_02806	116.82	143.39	8.18	3.69	8.85	18.11	16.28	26.49	92.2	147.13	89.86	72.07	16.13	16.14	-4.325	1.313e-32	-3.182	4.62e-19	-2.632	4.363e-15	-0.3665	0.3067	-2.507	8.213e-07	1.16566	0.1728	1.682	0.001407	3.89901	1.186e-17	1.74537	0.01102	0.5391	0.9172	2.79	2.014e-10	0.6198	0.4518	2.24673	5.148e-08	0.06852	0.85	2.11229	0.0002829
MVLG_04237	0.18	0.12	7.72	17.13	28.94	29.78	42.2	39.16	16.02	27.3	28.27	38.23	84.67	44.38	6.423	2.979e-08	7.609	4.225e-14	8.05	3.345e-31	7.237	2.613e-34	8.734	7.227e-19	1.20617	0.1728	1.614	0.003762	0.725024	0.267	2.27909	0.001267	0.4225	0.9799	-0.4209	0.4518	1.083	0.2533	-0.835038	0.06051	0.6628	0.4958	-1.54157	0.00218
MVLG_04442	22.19	28.14	11.04	8.61	26.16	20.48	21.25	36.18	56.3	54.81	67.98	75.3	36.63	7.5	-1.222	0.007358	-0.03636	0.9901	0.1559	0.6433	1.15	0.001167	0.2827	0.5533	1.2051	0.1728	1.366	0.01686	2.31652	1.424e-06	1.43968	0.07832	0.1871	1	1.171	0.01851	0.2599	0.8657	0.979026	0.04323	0.05047	0.9673	0.866715	0.2739
MVLG_03298	1.74	1.36	18.84	4.06	1.8	3.46	3.68	4.26	24.02	61.3	40.09	16.57	5.72	8.19	3.024	1.05e-05	0.8562	0.6489	1.354	0.1094	4.723	7.684e-29	2.354	0.014	-2.05879	0.1747	-1.636	0.07298	1.63446	0.001207	-0.696949	0.8902	NA	NA	3.831	3.633e-08	NA	NA	3.35428	2.942e-09	NA	NA	2.35165	0.001996
MVLG_01942	348.76	368.55	68.91	53.72	87.19	101.16	83.83	127.68	80.63	97.12	82.53	87.77	95.89	103.06	-2.417	9.42e-19	-1.846	1.995e-10	-1.732	6.933e-09	-2.186	5.188e-12	-1.817	8.924e-07	0.607053	0.1751	0.6883	0.06543	0.175733	0.722	0.559552	0.541	0.1042	1	-0.359	0.4234	-0.02845	1	-0.455296	0.2991	-0.1409	0.8693	-0.353531	0.5875
MVLG_00019	175.13	154.08	58.92	38.83	29	28.04	10.83	18.96	66.23	36.58	48.53	138.92	70.4	46.84	-1.611	2.952e-08	-2.444	3.327e-13	-3.519	1.286e-22	-1.846	1.086e-08	-1.121	0.01571	-0.793988	0.1759	-1.901	1.622e-05	-0.281188	0.5614	0.444398	0.6587	-1.075	0.4207	0.5852	0.2533	1.269	0.04733	1.66175	0.0003454	2.319	3.221e-05	-0.72894	0.1473
MVLG_06569	0.48	0.18	716.8	688.79	458.91	502.26	250.52	336.72	40.54	71.63	95.76	395.86	558.4	912.11	11.17	2.231e-117	10.57	1.028e-90	9.815	1.139e-80	7.661	2.03e-50	11.02	3.873e-50	-0.562306	0.1759	-1.352	1.824e-05	-3.57965	4.414e-27	-0.173945	0.9066	-0.7664	0.299	-2.942	7.672e-18	0.4045	0.6834	-2.16948	3.519e-10	1.164	0.02473	-3.3756	2.091e-17
MVLG_01918	52.3	69.46	28.15	24.62	11.42	20.9	14.59	24.28	66.33	33.44	70.78	49.97	45.56	34.9	-1.082	0.0001467	-1.829	1.116e-08	-1.657	2.082e-07	-0.2765	0.4558	-0.4798	0.2933	-0.709354	0.1762	-0.575	0.2253	0.758545	0.05773	0.557822	0.5359	0.1618	1	1.54	0.0001773	1.287	0.03279	1.37959	0.0007005	1.108	0.05513	0.213806	0.7905
MVLG_01943	18.29	15.53	64.89	63.55	49.04	36.44	48.14	41.95	76.15	82.93	60.1	50.26	63.94	43.92	2.062	7.826e-14	1.41	5.49e-06	1.452	2.196e-06	1.962	1.813e-08	1.726	3.526e-05	-0.618491	0.1762	-0.6071	0.118	-0.1563	0.7292	-0.376	0.7422	0.03157	1	0.5336	0.2356	0.259	0.8783	0.516977	0.2592	0.2277	0.8381	0.252309	0.7084
MVLG_06501	139.45	115.18	67.12	56.25	35.34	40.43	26.19	35.61	78.85	94.83	66.55	39.25	63.71	83.83	-0.904	0.001675	-1.659	2.679e-07	-2.031	4.316e-10	-0.7843	0.01986	-0.8039	0.03901	-0.717435	0.1762	-1.124	0.005237	0.0636198	0.9197	0.0606633	1	-0.3799	0.9799	0.8535	0.05748	0.7907	0.3729	1.23835	0.003528	1.157	0.06803	0.0409617	0.9251
MVLG_04855	27	17.6	191.93	209.08	150.24	124.86	120.71	129.83	55.12	43.33	56.88	94.98	131.98	124.42	3.315	7.564e-33	2.708	9.798e-20	2.535	8.913e-17	1.082	0.002012	2.521	1.033e-09	-0.572678	0.1766	-0.7772	0.02538	-2.28616	3.512e-12	-0.830313	0.1313	-0.1829	1	-1.642	3.308e-06	-0.2426	0.8143	-1.44606	5.237e-05	-0.06311	0.9487	-1.42391	0.0009509
MVLG_00833	421.97	283.08	1099.13	1532.6	2044.25	1854.93	1744.63	1541.1	1429.57	1487.36	1339.41	1066.3	1353.43	1136.58	2.064	4.213e-15	2.577	2.028e-19	2.304	6.959e-15	2.023	5.925e-09	1.943	9.738e-07	0.545309	0.1778	0.24	0.596	-0.0983331	0.8264	-0.158979	0.9331	-0.2844	0.9799	-0.5715	0.1496	-0.6875	0.2509	-0.273935	0.5653	-0.4053	0.5248	0.0941534	0.9011
MVLG_01518	115.5	94.78	682.78	581.91	487.11	375	442.94	413.19	387.92	224.26	288.42	688.62	566.1	655.8	2.747	1.039e-23	2.129	7.983e-13	2.099	3.859e-12	1.484	1.83e-05	2.74	2.12e-11	-0.583079	0.1778	-0.6436	0.0806	-1.30974	0.0001249	-0.0450416	1	-0.04034	1	-0.6567	0.1056	0.5578	0.4847	-0.600616	0.1531	0.5974	0.3601	-1.24145	0.003836
MVLG_02113	206.79	182.01	143.12	125.52	82.48	68.99	31.76	71.73	48.92	29.26	32.66	86.69	89.95	71.68	-0.3661	0.2805	-1.254	0.0008809	-1.966	2.587e-07	-2.403	1.185e-12	-0.978	0.03944	-0.849421	0.1778	-1.596	0.001138	-2.08876	2.379e-07	-0.651979	0.5436	-0.7092	0.9097	-1.163	0.03025	0.2129	0.956	-0.460089	0.4375	0.8832	0.3819	-1.39514	0.0166
MVLG_02305	40.58	39.4	40.75	31.3	23.61	16.09	11.91	8.79	34.46	25.28	28.88	76.57	32.3	19.26	-0.01103	0.9961	-0.9348	0.02106	-1.86	9.848e-07	-0.5626	0.12	-0.2429	0.8693	-0.884875	0.1778	-1.836	8.652e-05	-0.602974	0.1842	-0.278196	0.9907	-0.9324	0.6386	0.3581	0.586	0.6358	0.4794	1.31575	0.006861	1.581	0.01211	-0.323774	0.5754
MVLG_03932	0.13	0.13	41.5	2.84	18.92	5.5	7.51	4.5	3.18	9.24	1.13	0	0	4.44	7.438	1.083e-27	6.506	6.868e-13	5.547	1.12e-12	5.05	1.348e-22	NA	NA	-0.88741	0.1778	-1.87	0.0001491	-2.46175	2.929e-09	-3.78298	2.815e-06	-0.9662	0.6602	-1.502	0.005438	-2.857	0.009954	-0.50962	0.4411	-1.907	0.1249	1.39847	0.1823
MVLG_04390	85.14	95.78	44.03	31.94	30.56	12.84	37.87	23.13	45.38	21.36	18.07	36.62	37.86	16.93	-1.117	0.0003047	-1.998	2.197e-08	-1.485	3.743e-06	-1.868	1.79e-08	-1.522	0.0007592	-0.843801	0.1778	-0.3621	0.4823	-0.796469	0.07525	-0.44669	0.8021	0.4976	0.9705	0.1227	0.8409	0.4145	0.7977	-0.349668	0.5817	-0.06773	1	-0.311131	0.7408
MVLG_05315	196.68	209.49	139.63	111.83	84.84	81.08	52.07	72.34	57.49	37.76	60.32	109.67	82.44	99.08	-0.5572	0.04827	-1.212	6.062e-05	-1.686	5.249e-08	-2.106	4.464e-11	-1.027	0.01225	-0.619132	0.1778	-1.126	0.001676	-1.59718	3.381e-06	-0.511079	0.6022	-0.4814	0.8835	-0.9056	0.02387	0.1305	0.952	-0.416725	0.3734	0.6022	0.3882	-1.06906	0.02121
MVLG_05666	123.55	115.54	242.14	205.61	168.19	126.37	90.24	87.83	16.03	25.28	33.14	189.5	153.51	165.76	1.053	0.0001541	0.384	0.2553	-0.369	0.2871	-2.265	2.179e-12	0.5987	0.1865	-0.633738	0.1778	-1.417	5.075e-05	-3.37552	2.045e-22	-0.494869	0.6251	-0.7623	0.4528	-2.669	5.325e-13	0.1595	0.9477	-1.89602	3.863e-07	0.9209	0.133	-2.86722	1.219e-11
MVLG_06602	70.53	105.7	12.79	9.35	18.72	21.22	27.45	31.17	107.44	90.95	128.4	68.35	41.08	28.14	-2.871	6.282e-20	-2.07	1.455e-10	-1.573	4.878e-07	0.1463	0.7261	-1.078	0.01651	0.831931	0.1778	1.295	0.00195	2.96586	1.412e-13	1.73954	0.001362	0.4841	0.8954	2.202	4.795e-08	0.9359	0.1695	1.72573	1.071e-05	0.4491	0.5304	1.2222	0.01429
MVLG_02911	392.51	330.72	593.83	691.2	1158.77	809.16	949.98	917.24	558.53	452.04	478.43	723.68	572.7	486.66	0.9981	0.0003088	1.55	1.024e-07	1.473	7.486e-07	0.5599	0.1237	0.9055	0.03365	0.583483	0.1791	0.4766	0.2362	-0.491322	0.2136	-0.133265	0.9758	-0.08648	1	-1.005	0.007285	-0.6977	0.3163	-0.90344	0.01851	-0.6116	0.3317	-0.333576	0.6091
MVLG_05215	4930.34	5158.63	54.01	2.79	40.51	80.26	35.62	57.81	106.84	41.12	22.9	932.96	59.16	55.27	-7.297	7.507e-93	-6.265	1.513e-68	-6.765	5.197e-72	-6.589	1.214e-71	-4.741	3.441e-25	1.06147	0.1808	0.5316	0.4417	0.668568	0.1583	2.47502	1.162e-05	-0.5068	0.9799	-0.3353	0.6594	1.508	0.008707	0.17826	0.7867	2.011	0.0001964	-1.9268	4.297e-05
MVLG_03169	981.71	653.52	1808.62	2672.94	3394.82	3181.01	2843.29	2926.22	2272.02	1153.72	968.72	2301.68	1007.81	1051.62	1.625	4.615e-10	2.132	4.438e-14	1.923	5.489e-11	0.9064	0.009413	0.8964	0.02537	0.538945	0.1821	0.2983	0.4823	-0.767322	0.03202	-0.766538	0.2381	-0.2193	1	-1.237	0.000444	-1.278	0.008856	-1.0016	0.006646	-1.061	0.03385	0.013277	1
MVLG_05078	472.99	337.18	1132.79	1748.31	2347.86	1926.83	1980.24	1789.61	1459.8	1165.42	1187.64	1679.53	1041.33	973.94	1.998	3.981e-14	2.515	2.373e-18	2.321	5.067e-15	1.732	5.49e-07	1.732	1.322e-05	0.547743	0.183	0.3227	0.4461	-0.321382	0.431	-0.304722	0.8312	-0.2042	1	-0.7984	0.03477	-0.8299	0.1637	-0.579578	0.1596	-0.627	0.2997	0.0056131	1
MVLG_00256	97.02	100.74	39.07	43.21	19.1	20.58	13.75	20.7	41.16	37.9	31.59	66.41	38.65	40.02	-1.12	0.001004	-2.226	8.162e-08	-2.554	7.361e-11	-1.488	7.196e-06	-1.089	0.03858	-1.06322	0.1837	-1.427	0.01176	-0.425006	0.4078	-0.0163868	1	-0.3337	1	0.7181	0.283	1.066	0.293	1.05577	0.06342	1.386	0.07307	-0.392623	0.5843
MVLG_05675	427.16	456.69	26.3	24.1	7.29	16.88	1.5	6.91	59.65	70.69	46.22	67.02	71.38	40.33	-3.994	4.724e-37	-5.095	1.126e-41	-7.041	1.156e-56	-3.01	5.775e-21	-2.818	1.825e-12	-1.05738	0.1837	-3.012	6.582e-06	0.926758	0.04019	1.12785	0.1356	-1.917	0.3728	2.061	3.452e-05	2.196	0.0008665	3.99823	1.001e-12	4.069	4.546e-09	-0.17694	0.8431
MVLG_00261	22.43	21.64	770.06	735.73	443.59	601.26	205.3	356.75	96.49	71.81	113.59	399.36	555.16	774.79	5.229	1.071e-69	4.659	1.785e-50	3.715	1.682e-32	1.946	2.318e-08	4.802	4.614e-28	-0.532121	0.1841	-1.511	4.976e-07	-3.33442	1.548e-24	-0.466352	0.5436	-0.9557	0.07228	-2.727	3.735e-16	0.08696	0.9844	-1.76224	3.039e-07	1.036	0.0444	-2.84276	2.047e-13
MVLG_05894	79.34	89.42	1047.65	1053.53	1339.33	1723.44	1268.14	1997.6	201.78	320.32	442.52	516.11	820.98	1187.57	3.783	1.962e-41	4.286	3.799e-44	4.337	1.02e-41	1.908	4.347e-08	3.534	2.972e-17	0.539028	0.1845	0.5566	0.1246	-1.9332	2.662e-09	-0.28978	0.7848	0.03962	1	-2.395	8.152e-13	-0.8116	0.1299	-2.4276	6.656e-13	-0.8572	0.07623	-1.6087	7.63e-05
MVLG_06174	157.8	116.26	330.52	226.46	321.15	492.41	264.07	401.04	95.53	78.28	74.95	224.12	180.21	279.64	1.168	1.084e-05	1.677	3.411e-09	1.33	6.468e-06	-0.843	0.01222	0.83	0.04847	0.550624	0.1848	0.1691	0.732	-2.06042	4.206e-10	-0.374056	0.7305	-0.3594	0.954	-2.537	8.135e-14	-0.9006	0.1089	-2.16818	2.471e-10	-0.549	0.3717	-1.6597	5.923e-05
MVLG_02051	111.65	116.24	31.54	22.09	14.75	18.06	16.47	14.29	91.71	78.08	95.2	74.73	37.16	31.19	-1.957	4.504e-12	-2.715	4.088e-17	-2.85	6.872e-19	-0.5242	0.1331	-1.414	0.001016	-0.719512	0.1876	-0.8865	0.03454	1.38304	0.0002575	0.497738	0.5821	-0.1487	1	2.175	8.488e-08	1.249	0.03921	2.33806	3.745e-09	1.403	0.007976	0.881424	0.1154
MVLG_05542	0.48	0.73	50.58	49.97	85.64	70.9	106.64	88.48	43.35	118	75.45	25.65	85.18	98.86	6.499	5.384e-67	7.076	1.267e-69	7.358	1.534e-75	6.903	1.153e-51	7.09	1.487e-35	0.609896	0.189	0.8598	0.01741	0.337209	0.4594	0.554251	0.6545	0.2693	0.9938	-0.1997	0.6791	-0.0471	0.9494	-0.457801	0.2959	-0.3175	0.5819	-0.16505	0.9166
MVLG_01124	9.66	9.19	28.82	24.65	16.96	12.31	14.24	10.91	31.94	33.86	25.55	9.71	29.11	19.82	1.642	1.978e-06	0.71	0.1261	0.488	0.255	1.569	1.058e-05	1.415	0.00643	-0.892755	0.1891	-1.146	0.01507	-0.129108	0.8053	-0.265929	0.8774	-0.2347	1	0.8397	0.1163	0.6368	0.7194	1.09369	0.01843	0.8797	0.3654	0.177711	0.76
MVLG_01727	124.8	130.16	42.57	33.87	20.19	20.99	26.66	24.16	88.96	58	63.99	93.32	36.1	28.3	-1.603	1.581e-07	-2.543	1.875e-12	-2.273	1.001e-11	-0.9766	0.003536	-1.593	0.001325	-0.901202	0.1891	-0.6662	0.2002	0.577052	0.1983	-0.0390259	1	0.2551	1	1.552	0.0008522	0.8923	0.2709	1.31198	0.002398	0.6454	0.3567	0.609274	0.5062
MVLG_07034	46.22	41.87	92.45	71.47	153.77	129.36	169.41	197.64	102.04	108.23	95.37	65.48	52.32	90.46	1.055	0.00226	1.781	1.871e-07	2.122	2.917e-11	1.216	0.0006074	0.8637	0.1031	0.758199	0.1891	1.068	0.01011	0.10581	0.8691	-0.235041	0.9432	0.3309	0.9799	-0.5835	0.204	-0.9712	0.2226	-0.905228	0.02446	-1.307	0.03021	0.359494	0.6612
MVLG_06196	1.55	2.13	51.06	41.76	29.02	25.73	9.15	14.35	3.22	2.64	5.25	33.29	25.17	21.09	4.782	2.49e-39	3.962	1.152e-17	2.617	2.725e-08	0.9063	0.04201	3.814	2.265e-12	-0.782578	0.1896	-2.158	8.744e-07	-3.92999	1.981e-22	-1.00739	0.2356	-1.345	0.1439	-3.07	1.011e-10	-0.2045	0.9686	-1.72339	0.0006608	1.117	0.1892	-2.8989	6.918e-08
MVLG_01859	1.89	2.03	110.3	87.35	157.6	146.32	240.73	147.47	57.81	124.31	97	22.96	93.41	95.87	5.787	1.147e-63	6.351	1.075e-66	6.67	5.374e-69	5.478	1.691e-38	5.505	1.883e-27	0.599082	0.1912	0.8853	0.01341	-0.371624	0.3646	-0.318185	0.7201	0.3034	0.9799	-0.8979	0.01899	-0.9085	0.07653	-1.18853	0.001093	-1.211	0.006189	-0.0040473	0.926
MVLG_06549	1597.16	1121.48	151.55	88.95	259.44	135.1	278.96	180.37	114.03	148.46	114.35	112.55	187.39	251.08	-3.334	1.357e-30	-2.701	4.042e-19	-2.476	2.394e-16	-3.437	1.692e-26	-2.564	2.788e-12	0.665854	0.1916	0.864	0.02957	-0.157894	0.7466	0.731664	0.4501	0.2142	1	-0.7548	0.06914	0.07852	1	-0.950857	0.0151	-0.1292	0.8532	-0.852512	0.1116
MVLG_02116	9.48	9.25	123.53	102.99	73.92	66.58	41.06	33.57	46.73	50.23	39.53	0	42.07	88.06	3.74	4.535e-31	2.992	6.418e-15	2.068	4.243e-08	2.22	1.435e-09	2.753	1.399e-07	-0.710891	0.1921	-1.665	1.778e-05	-1.57633	1.57e-05	-1.02526	0.03184	-0.9358	0.3588	-0.7924	0.08489	-0.3007	0.6519	0.162351	0.8128	0.6396	0.6943	-0.512822	0.754
MVLG_00338	41.43	29.06	203.59	138	85.46	113.15	56.13	78.58	188.16	264.3	198.96	47.74	131.63	357.08	2.457	8.692e-14	1.625	8.803e-05	0.9772	0.01237	2.721	7.58e-14	2.888	3.077e-10	-0.792045	0.1936	-1.473	0.0009523	0.206937	0.7002	0.391603	0.8876	-0.6542	0.8734	1.072	0.02266	1.194	0.1299	1.73048	9.047e-05	1.833	0.003352	-0.147223	0.9773
MVLG_03543	0	0	180.1	194.38	107.27	147.77	82.24	94.34	11.95	24.44	25.87	191.05	139.02	113.96	15.25	3.434e-106	14.65	7.277e-81	14.1	7.17e-75	12.17	3.037e-46	14.45	4.342e-42	-0.558673	0.1969	-1.183	0.0002871	-3.45439	3.912e-25	-0.521066	0.5558	-0.6017	0.6096	-2.82	3.604e-16	0.06419	0.9849	-2.21236	2.034e-10	0.6598	0.2871	-2.91757	3.548e-13
MVLG_00021	209.83	226.78	33.46	29.36	13.39	21.94	14.9	20.39	38.66	66.37	59.91	28.3	51.92	50.61	-2.663	1.694e-19	-3.538	7.807e-25	-3.639	2.03e-26	-2.092	4.083e-11	-2.087	4.601e-08	-0.836247	0.1971	-0.9738	0.05042	0.510934	0.2655	0.532371	0.7416	-0.1109	1	1.422	0.001968	1.378	0.05936	1.53361	0.0004676	1.474	0.01888	0.0132751	0.9542
MVLG_02467	24.83	18.19	27.88	28.15	63.61	29.01	70.76	40.09	76.8	53	60.31	28.02	38.02	16.29	0.5242	0.1059	1.17	0.0002887	1.425	4.437e-06	1.411	4.765e-05	0.4615	0.3921	0.676229	0.1971	0.9029	0.02371	0.83643	0.0413	-0.102848	0.9934	0.2426	1	0.2288	0.6656	-0.7645	0.3215	0.0082583	0.988	-0.9983	0.08699	0.968549	0.05539
MVLG_03779	24.17	23.96	49.62	37.52	64.59	75.43	54.47	77.16	26.37	33.42	37.69	22.37	46.75	36.84	0.9938	0.001773	1.628	4.024e-07	1.473	2.962e-06	0.3401	0.3935	0.8337	0.1085	0.669451	0.1987	0.4812	0.2915	-0.709655	0.08141	-0.20011	0.9091	-0.1641	1	-1.308	0.0007726	-0.8569	0.1956	-1.13996	0.0031	-0.7058	0.2476	-0.476224	0.5501
MVLG_00113	5.43	3.94	23.83	12.69	31.57	33.83	21.35	15.17	32.39	32.81	28.46	51.69	30.16	26.3	2.104	2.567e-07	2.892	1.495e-13	2.044	8.01e-08	2.622	1.142e-12	2.823	5.862e-09	0.820253	0.199	-0.05403	0.9624	0.463864	0.3585	0.67227	0.5383	-0.8612	0.483	-0.2898	0.5947	-0.1232	1	0.593291	0.2353	0.7501	0.3282	-0.202314	0.7611
MVLG_01002	100.92	90.25	48.94	35.29	25.75	21.92	44.1	37.12	58.37	42.71	48.3	69.68	25.32	43.58	-1.039	0.0008689	-1.92	1.377e-07	-1.175	0.0003188	-1.055	0.001615	-1.238	0.01584	-0.841635	0.199	-0.1313	0.8737	-0.0655863	0.9155	-0.245402	0.9887	0.7295	0.7189	0.8506	0.09779	0.6261	0.4893	0.135061	0.829	-0.0939	1	0.178029	0.9489
MVLG_03149	69.96	65.14	23.5	20.12	18.1	8.51	10.52	12.04	21.69	18.1	20.22	26.64	20.22	27.75	-1.497	3.262e-07	-2.281	9.931e-12	-2.57	1.481e-14	-1.911	2.831e-09	-1.41	0.000943	-0.748996	0.199	-1.069	0.0153	-0.46714	0.2829	0.0427567	1	-0.2941	1	0.3568	0.5275	0.8148	0.3623	0.660292	0.1938	1.102	0.09145	-0.492926	0.4319
MVLG_05742	118.36	107.32	8.96	3.57	16.64	12.64	13.49	12.23	47.92	40.23	44.2	32.7	11.6	17.98	-4.031	9.464e-27	-2.868	5.287e-15	-3.083	1.976e-18	-1.477	5.385e-06	-2.727	5.609e-08	1.18259	0.199	0.9428	0.2155	2.50093	2.582e-07	1.23852	0.197	-0.2259	1	1.375	0.005323	0.08646	0.9633	1.61591	0.0003091	0.3175	0.738	1.24357	0.07394
MVLG_01799	98.96	93.73	411.59	368.34	257.4	271.83	168.71	242.73	158.12	77.36	85.15	111.56	206.62	196.18	2.165	1.425e-15	1.554	2.052e-07	1.14	0.0001953	0.05512	0.8892	1.105	0.01271	-0.57512	0.1991	-1.022	0.003318	-2.15578	1.427e-10	-1.09832	0.02047	-0.4222	0.9147	-1.51	4.194e-05	-0.5107	0.4668	-1.07631	0.005302	-0.09895	0.878	-1.01733	0.0436
MVLG_01999	132.57	153.79	54.39	40.77	41.63	11.99	27.61	32.85	54.41	30.57	29.09	38.5	39.32	30.55	-1.449	3.984e-06	-2.358	1.322e-10	-2.226	1.486e-10	-2.045	5.957e-10	-1.858	4.683e-05	-0.871217	0.1997	-0.7734	0.1518	-0.644318	0.1779	-0.451225	0.7954	0.1259	1	0.3048	0.6197	0.4394	0.789	0.187885	0.7869	0.3043	0.8262	-0.158759	0.9127
MVLG_03139	12.01	14.96	135.01	108.08	81.57	64.56	92.14	64.09	34.58	65.37	55.66	63.62	132.74	128.68	3.319	9.362e-23	2.522	2.056e-09	2.631	2.443e-13	1.986	6.964e-08	3.384	1.073e-12	-0.760255	0.1997	-0.6822	0.1303	-1.39358	0.0002254	0.0241143	1	0.09383	1	-0.5589	0.2667	0.7956	0.4162	-0.635826	0.1695	0.7129	0.3884	-1.38552	0.005608
MVLG_04310	137.94	129.51	26.15	24.78	59.19	39.96	72.97	51.88	91.61	116.28	102.49	40.59	60.5	44.39	-2.245	6.936e-11	-1.351	0.0001139	-1.017	0.001602	-0.4221	0.2362	-1.21	0.005186	0.921799	0.1997	1.227	0.01201	1.76495	5.401e-05	0.985279	0.3307	0.3196	1	0.91	0.05626	0.07878	1	0.607907	0.1938	-0.2318	0.828	0.804986	0.1404
MVLG_04418	0.2	0.07	668.56	802.49	529.9	511.39	367.48	469.47	30.22	76.9	119.33	437.8	605.91	568.19	12.49	3.686e-145	11.93	8.274e-116	11.58	4.19e-110	8.984	1.857e-64	11.97	9.511e-59	-0.522243	0.1997	-0.9083	0.004964	-3.582	7.356e-28	-0.544992	0.4349	-0.3642	0.945	-2.983	5.344e-19	-0.004421	1	-2.61172	1.039e-14	0.3559	0.6379	-3.00811	9.853e-15
MVLG_04639	87.22	63.54	355.85	329.32	230.75	244.28	215.4	244.16	146.86	138.65	155.18	247.06	232.58	254.44	2.329	2.236e-18	1.748	1.314e-09	1.655	2.269e-08	0.8462	0.01631	1.78	8.916e-06	-0.544593	0.1997	-0.6698	0.06021	-1.5362	3.53e-06	-0.586333	0.4141	-0.1038	1	-0.9185	0.01422	-0.0209	1	-0.803648	0.03809	0.07853	0.9701	-0.922975	0.04197
MVLG_04833	18.4	15.4	10.58	11.14	32.33	10.17	34.7	22.85	68.06	86.57	51.16	31.98	17.27	7.2	-0.4973	0.2275	0.3888	0.3644	0.8357	0.01413	1.895	6.414e-08	-0.1291	0.9766	0.912218	0.1997	1.332	0.004659	2.33301	2.869e-08	0.319457	0.8706	0.4352	0.9727	1.488	0.0004962	-0.5659	0.7461	1.07335	0.009323	-0.9901	0.2592	2.02611	0.0002588
MVLG_06292	37.07	31.12	94.48	67.31	42.65	60.87	31.61	50.66	29.26	45.4	37.85	80.03	54.03	82.77	1.393	9.709e-07	0.7	0.0382	0.2794	0.4034	0.04956	0.9325	1.136	0.009005	-0.653645	0.1997	-1.109	0.004236	-1.4006	7.292e-05	-0.297803	0.8748	-0.4282	0.9719	-0.6738	0.1195	0.3783	0.7281	-0.24533	0.6143	0.7904	0.2449	-1.08455	0.02168
MVLG_06405	3.56	4.87	29.58	20.25	9.81	15.41	13.91	14.55	34.28	8.58	10.93	33.75	19.12	24.22	2.691	5.836e-12	1.663	0.002331	1.773	1.65e-05	1.805	9.007e-07	2.515	1.243e-06	-0.986476	0.1997	-0.9126	0.09542	-0.926339	0.06667	-0.221797	0.9858	0.09646	1	0.1372	0.809	0.7848	0.4783	0.0567845	0.894	0.6898	0.4624	-0.668693	0.3516
MVLG_00201	31.99	40.8	158.25	129.65	125.53	55.41	91.57	74.65	73.53	166.4	124.34	142.83	160.09	174.1	2.128	3.032e-12	1.378	0.0002153	1.266	0.0002033	1.748	7.914e-07	2.34	9.231e-08	-0.715804	0.2006	-0.8577	0.03617	-0.442359	0.2832	0.168978	0.985	-0.1221	1	0.3486	0.5398	0.902	0.2599	0.4855	0.3436	1.03	0.1051	-0.580386	0.3351
MVLG_01678	1076.34	696.15	20.74	0	4.99	2.01	0	3.84	14.69	18.46	7.99	17.03	21.96	28.09	-6.268	2.853e-71	-7.901	6.995e-71	-9.472	6.949e-79	-6.097	1.046e-64	-5.079	1.167e-32	-1.55743	0.2006	-3.102	0.007101	0.115183	0.7408	1.13816	0.3343	NA	NA	1.777	0.02179	2.702	0.003123	3.33377	4.258e-05	4.164	5.138e-05	-1.00747	0.118
MVLG_03157	127.13	109.95	74.36	57.51	33.4	47.04	23.4	38.53	51.11	27.4	36.91	38.37	52.14	51.47	-0.7036	0.01847	-1.463	1.243e-05	-1.95	8.168e-09	-1.764	6.585e-08	-1.124	0.006712	-0.72069	0.2006	-1.243	0.003159	-1.10724	0.004134	-0.460086	0.6786	-0.4931	0.9672	-0.3144	0.5796	0.2745	0.9241	0.180019	0.813	0.7451	0.3831	-0.615338	0.3542
MVLG_05581	62.35	61.63	2.02	7.97	2.66	0.65	0.46	2.64	582.7	438.16	465.72	157.87	86.98	13.4	-3.492	9.948e-23	-5.164	4.348e-28	-5.707	1.373e-33	2.844	1.618e-15	0.2527	0.5121	-1.6018	0.2006	-2.177	0.02223	6.28012	4.385e-42	3.67789	7.294e-12	NA	NA	7.991	1.154e-46	5.307	8.619e-16	8.52561	1.533e-50	5.813	5.154e-18	2.57417	1.568e-09
MVLG_02876	44.81	34.37	154.07	173.27	122.68	101.47	80.63	98	48.45	40.67	54.38	122.7	86.62	105.39	2.192	9.697e-16	1.583	1.522e-07	1.213	7.994e-05	0.1561	0.7108	1.438	0.0005565	-0.575132	0.2053	-0.9776	0.00554	-2.09012	4.082e-10	-0.795386	0.2446	-0.3789	0.9652	-1.442	8.839e-05	-0.1976	0.9126	-1.05331	0.005923	0.1764	0.8628	-1.27663	0.004095
MVLG_05994	218.41	292.64	96.59	65.84	132.14	128.85	278.36	141.39	197.58	276.42	261.9	87.51	73.55	105.6	-1.515	2.984e-07	-0.8864	0.005242	-0.2171	0.4929	-0.1125	0.7705	-1.383	0.0009748	0.662142	0.2053	1.3	0.0004103	1.34636	0.0005566	0.0870958	1	0.6514	0.6079	0.7549	0.08431	-0.5547	0.5435	0.120363	0.8351	-1.196	0.02986	1.28147	0.007191
MVLG_06566	0.06	0	1026.11	1066.85	724.52	746.96	320.77	520.95	28.44	61.72	98.63	681.04	754.07	937.73	14.72	8.882e-130	14.16	2.786e-102	13.32	1.648e-89	10.59	5.494e-49	14.19	5.824e-53	-0.525478	0.2053	-1.405	5.736e-06	-4.28191	8.154e-37	-0.45251	0.577	-0.8558	0.1725	-3.681	1.23e-26	0.09185	0.9822	-2.8198	2.239e-16	0.9402	0.08324	-3.80578	2.613e-21
MVLG_01684	78.77	94.79	83.38	83.12	91.05	179.3	164.44	123.44	20.51	49.34	55.31	58.63	129.45	143.83	0.08605	0.8265	0.7545	0.02839	0.8074	0.01372	-1	0.002224	0.732	0.1624	0.702802	0.2056	0.722	0.1169	-1.14792	0.003751	0.601459	0.6971	0.0337	1	-1.78	4.585e-06	-0.09031	0.944	-1.80303	8.728e-07	-0.1203	0.8608	-1.72397	0.0002637
MVLG_00988	261.34	179.38	972.56	1131.22	1627.01	1474.71	1449.06	1215.97	1341.7	904.42	818.48	809.8	721.03	705.69	2.432	5.315e-19	2.945	2.59e-23	2.717	3.832e-19	2.343	2.631e-11	2.021	9.181e-07	0.546245	0.2067	0.2864	0.5255	-0.14016	0.7586	-0.449458	0.6309	-0.24	1	-0.6165	0.123	-0.9777	0.07099	-0.360621	0.4361	-0.7387	0.187	0.337486	0.5739
MVLG_00762	114.35	113.21	7.8	2.75	5.88	15.69	9.66	11.06	78.42	52.67	71.69	87.25	29.67	16.5	-4.3	3.8e-34	-3.302	5.776e-21	-3.449	1.871e-23	-0.9052	0.006657	-1.765	0.00022	1.024	0.208	0.8472	0.2069	3.34634	5.669e-14	2.46699	1.854e-05	-0.16	1	2.38	5.699e-08	1.481	0.01915	2.54862	1.551e-09	1.642	0.004045	0.834044	0.2568
MVLG_02303	300.02	262.81	839.24	797.39	586.52	538.97	343.28	581.01	150.83	230.92	222.45	303.42	380.98	587.81	1.706	1.958e-10	1.11	0.0001998	0.7876	0.01021	-0.4051	0.2532	0.9162	0.03899	-0.560877	0.208	-0.9151	0.009398	-2.16964	4.952e-11	-0.828101	0.1304	-0.3291	0.9762	-1.535	1.88e-05	-0.2533	0.7887	-1.20048	0.001118	0.06511	1	-1.30399	0.003682
MVLG_02788	78.34	85.78	197.15	188.45	298.46	276.01	361.46	263.76	150.14	277.1	250.37	115.92	285.02	259.02	1.369	4.435e-07	1.887	7.164e-11	1.972	3.076e-11	1.37	7.581e-05	1.633	6.96e-05	0.552115	0.2086	0.6045	0.107	-0.0594836	0.8969	0.224923	0.9503	0.07146	1	-0.5379	0.1868	-0.316	0.6865	-0.597806	0.1458	-0.3884	0.5184	-0.23969	0.7882
MVLG_03673	295.74	286.94	116.82	113.37	73.37	84.01	68.95	83.1	162.1	113.32	145.56	173.45	133.15	173.94	-1.205	5.666e-06	-1.804	5.541e-10	-1.907	1.986e-10	-1.209	0.0001913	-0.8195	0.0378	-0.563099	0.2086	-0.699	0.05935	-0.0542668	0.911	0.346415	0.7741	-0.1135	1	0.5811	0.1778	0.9318	0.1246	0.705338	0.09962	1.039	0.0523	-0.379124	0.521
MVLG_03780	130.31	122.46	142.63	215.08	323.78	260.61	405.89	344.34	238.91	466	364.47	59.72	167.56	198.5	0.6605	0.04945	1.321	6.838e-05	1.683	7.491e-08	1.646	2.545e-06	0.749	0.1847	0.690337	0.2086	1.021	0.0105	0.921546	0.02847	0.0451018	1	0.3492	0.9799	0.3032	0.5803	-0.6331	0.3554	-0.0335613	0.9489	-0.9811	0.0621	0.917525	0.04403
MVLG_03221	1864.77	2132.72	33.56	33.79	42.68	62.52	61.77	66.98	512.19	393.26	788.04	375.38	219.08	80.73	-5.76	1.56e-76	-5.16	1.494e-57	-4.927	2.105e-50	-1.965	5.26e-10	-3.241	2.531e-18	0.634026	0.2093	0.8328	0.03285	3.74239	7.581e-22	2.47623	2.873e-08	0.2193	1	3.181	4.886e-16	1.874	0.0001081	2.96991	2.044e-14	1.65	0.0005293	1.26875	0.003933
MVLG_06523	15.77	7.71	119.56	98.2	70.51	73.1	6.17	23.33	5.96	3.31	6.74	11.77	39.6	43.13	3.367	6.174e-30	2.713	3.117e-16	0.1672	0.6003	-1.282	0.000622	1.817	0.0001789	-0.617382	0.2105	-3.195	2.774e-15	-4.7023	9.307e-35	-1.58417	0.0005681	-2.532	6.392e-06	-4.008	7.577e-23	-0.9546	0.1109	-1.49726	0.003317	1.509	0.07216	-3.06651	1.414e-09
MVLG_00226	63.72	47.83	248.76	206.52	209.22	47.55	121.27	96.8	108.74	38.91	33.45	0	57.06	37.99	2.213	1.823e-09	1.294	0.0113	1.154	0.004947	0.2008	0.5395	0.2443	0.9757	-0.880344	0.2118	-1.05	0.03638	-2.05998	5.754e-06	-1.98969	0.00159	-0.1488	1	-1.097	0.1122	-1.091	0.1791	-0.923748	0.131	-0.9409	0.2071	0.0205125	0.6852
MVLG_01725	49.97	47.8	45.32	67.69	133.52	79.65	152.99	104.55	106.03	119.13	132.79	84.11	90.33	107.18	0.3646	0.4005	1.215	0.001735	1.515	6.836e-06	1.346	0.0001549	1.237	0.01419	0.87729	0.2118	1.148	0.01988	0.922777	0.05586	0.821844	0.4754	0.2849	1	0.1142	0.8904	-0.03631	1	-0.152261	0.8119	-0.3099	0.7667	0.119434	0.8968
MVLG_02073	138.42	141.23	38.89	49.44	20.96	22.54	7.97	20.64	536.84	112.68	165.41	365.22	67.96	14.53	-1.516	4.707e-06	-2.59	1.544e-10	-3.446	1.177e-16	0.8501	0.0152	-0.6988	0.4411	-1.03226	0.2118	-1.919	0.00225	2.32885	7.778e-09	0.754356	0.2532	-0.8486	0.9696	3.435	1.393e-13	1.843	0.005301	4.28883	8.466e-19	2.665	2.263e-05	1.50013	0.02735
MVLG_06348	173.54	171.54	155.99	154.16	108.27	96.48	181.04	147.63	375.07	480.97	474.46	200.05	291.27	256.59	-0.01035	0.9868	-0.6678	0.04101	-0.01347	0.9715	1.292	0.0001854	0.709	0.1143	-0.622586	0.2118	-0.00087	1	1.24556	0.0008092	0.679026	0.4023	0.6409	0.6383	1.942	6.85e-07	1.316	0.02368	1.31374	0.0007141	0.6761	0.3135	0.602382	0.2168
MVLG_07202	336.45	329.22	14.76	18.73	7.45	2.38	6.72	19.57	374.52	311.32	360.8	92.19	90.92	19.37	-4.165	3.187e-31	-6.005	2.576e-36	-4.845	6.925e-33	0.01204	0.9874	-2.27	1.23e-07	-1.75569	0.2136	-0.6761	0.6108	4.12299	4.028e-20	1.83468	0.01074	1.131	0.8611	5.998	8.546e-26	3.59	9.606e-06	4.82902	7.146e-23	2.447	0.0005569	2.29809	7.628e-07
MVLG_06895	362.39	374.77	108.05	81.49	176.7	112.86	253.14	186.49	174.96	189.38	213.09	127.11	143.01	115.72	-1.824	2.189e-11	-1.282	1.132e-05	-0.7047	0.01952	-1.054	0.001267	-1.427	0.0001706	0.574893	0.2145	1.123	0.0008747	0.7166	0.06965	0.356779	0.8178	0.5663	0.6678	0.212	0.684	-0.2007	0.881	-0.33951	0.4663	-0.7651	0.1754	0.386857	0.5171
MVLG_04510	29.85	18.31	6.37	5.77	3.5	1.36	6.05	2.22	36.32	44.4	34.01	25.56	12.99	10.76	-1.842	1.208e-06	-3.231	4.918e-11	-2.337	2.632e-10	0.5428	0.1415	-0.7718	0.1959	-1.32962	0.2192	-0.4852	0.5432	2.32649	1.996e-07	1.01581	0.3048	0.8618	0.9762	3.752	6.203e-12	2.364	0.006945	2.90831	3.797e-11	1.552	0.02348	1.31008	0.0329
MVLG_00804	107.57	115.51	187.55	185.26	82.69	150.92	113.04	98.78	13.3	28.63	23.24	154.66	113.65	125.6	0.8913	0.002552	0.1831	0.6387	0.0009115	1	-2.269	3.193e-12	0.3374	0.5142	-0.670675	0.2195	-0.8872	0.02676	-3.22277	3.171e-19	-0.597448	0.5558	-0.1989	1	-2.479	6.54e-10	0.09253	0.994	-2.27083	2.324e-09	0.2946	0.7673	-2.61538	7.809e-09
MVLG_05867	121.1	194.91	19.37	17.46	28.14	37.86	82.03	83.27	109.15	101.49	125.47	44.91	37.38	18.49	-2.975	1.766e-20	-2.181	3.434e-11	-0.9066	0.003614	-0.6242	0.06966	-2.282	1.862e-07	0.824547	0.2198	2.065	9.217e-08	2.2976	2.163e-08	0.64256	0.6152	1.259	0.03438	1.54	0.0002846	-0.1637	0.992	0.290929	0.5842	-1.423	0.01523	1.66948	0.0009271
MVLG_06600	64.42	55.39	80.29	104.84	119.68	163.34	87.82	134.04	46.61	39.96	47.76	49.43	106.89	120.19	0.7738	0.01027	1.342	1.411e-05	0.9209	0.003341	-0.506	0.1592	0.9242	0.0525	0.602301	0.2214	0.1462	0.7981	-1.33578	0.0003187	0.109263	1	-0.4305	0.9263	-1.865	3.999e-07	-0.4811	0.5111	-1.43017	0.0001325	-0.06489	0.9026	-1.40578	0.003206
MVLG_06870	158.4	141.28	380.25	459.52	567.26	650.5	703.03	534.29	542.8	464.14	461.83	686.64	438.05	483.52	1.633	7.339e-10	2.121	1.377e-13	2.099	1.285e-12	1.627	2.463e-06	1.886	2.057e-06	0.522551	0.2231	0.4669	0.2288	-0.059711	0.9004	0.213555	0.9021	-0.03552	1	-0.5094	0.213	-0.2835	0.8004	-0.460987	0.2906	-0.2501	0.7723	-0.251459	0.6954
MVLG_00986	1600.73	1461.15	149.89	198.9	152.05	374.02	220.76	377.33	44.67	32.71	94.67	226.52	176.15	305.99	-2.98	9.134e-26	-2.404	6.628e-16	-2.301	4.463e-14	-4.721	2.728e-44	-2.497	3.945e-11	0.612017	0.2234	0.6773	0.08793	-1.79555	7.635e-07	0.43832	0.7384	0.08994	1	-2.332	1.766e-10	-0.1537	0.9311	-2.42156	1.058e-11	-0.2567	0.7483	-2.21756	2.567e-07
MVLG_02503	101.21	86.94	479.37	418.68	331.28	295.07	193.81	229.93	130.6	94.87	130.64	540.61	283.88	386.64	2.405	7.145e-19	1.827	6.426e-10	1.225	6.009e-05	0.2715	0.4855	2.134	1.367e-07	-0.54303	0.2234	-1.176	0.0004074	-2.18413	4.453e-11	-0.310374	0.8481	-0.6104	0.616	-1.569	1.244e-05	0.259	0.8143	-0.947397	0.01502	0.8649	0.1265	-1.85903	5.524e-06
MVLG_02765	156.41	167.3	96.03	78.74	54.09	63.91	65.58	62.13	71.87	66.8	69.36	100.33	76.17	86.04	-0.7572	0.006177	-1.373	5.04e-06	-1.307	1.598e-05	-1.367	2.294e-05	-0.8641	0.03719	-0.578437	0.2251	-0.5465	0.1732	-0.661744	0.08021	-0.148172	0.9781	0.05186	1	-0.01071	0.9862	0.4532	0.631	-0.0506604	0.9313	0.4001	0.5974	-0.493769	0.376
MVLG_07231	15.77	20.3	273.15	183.63	332.14	355.51	441.48	306.33	104.12	406.3	269.03	89.5	612.69	751.14	3.809	5.36e-35	4.346	1.55e-39	4.441	4.04e-40	3.868	3.204e-24	5.115	4.396e-28	0.573801	0.226	0.636	0.1087	-0.0058016	0.9802	1.26686	0.02117	0.07908	1	-0.5056	0.2262	0.7009	0.4	-0.573936	0.1692	0.6227	0.4057	-1.22007	0.006692
MVLG_06419	96.54	118.08	502.4	323.51	266.95	294.17	112.87	187.74	64.79	64.16	68.68	303.71	196.57	329.12	2.063	9.933e-15	1.493	2.969e-07	0.5108	0.1026	-0.7864	0.0204	1.431	0.0004184	-0.531992	0.2272	-1.547	1.402e-06	-2.90093	1.818e-18	-0.670689	0.3265	-0.99	0.08768	-2.296	3.697e-11	-0.1168	0.9497	-1.29968	0.0004313	0.8617	0.144	-2.20485	4.989e-08
MVLG_03816	0.04	0	390	326.09	266.37	236.39	199.68	216.6	44.1	74.38	81.59	210.09	247.55	262.7	13.6	2.179e-105	13.03	1.025e-80	12.73	1.856e-79	11.06	5.255e-54	12.9	9.705e-41	-0.533171	0.2275	-0.8741	0.01074	-2.69319	2.449e-16	-0.623072	0.3598	-0.3197	0.9762	-2.086	1.65e-09	-0.07278	0.9719	-1.75735	5.106e-07	0.2432	0.8094	-2.0398	5.085e-07
MVLG_00956	111.55	128.89	73.07	49.87	100.37	100.59	56.5	84.55	27.05	38.04	36.73	126.81	47.06	74.21	-0.825	0.009806	-0.1716	0.6615	-0.7568	0.02956	-1.853	1.025e-08	-0.701	0.2176	0.686998	0.2276	0.06913	0.9251	-1.08513	0.008117	0.0753484	0.9804	-0.5915	0.8003	-1.702	1.454e-05	-0.5804	0.6531	-1.10944	0.006271	-0.002156	0.9935	-1.16621	0.01917
MVLG_04043	4.09	4.26	21.41	22.69	47.31	23.26	71.34	36.68	15.25	38.33	33.66	19.39	28.38	29.74	2.533	1.292e-15	3.135	2.102e-21	3.735	1.52e-30	2.685	1.304e-13	2.796	5.976e-10	0.631133	0.2276	1.203	0.0009824	0.0882082	0.8994	0.220264	0.9551	0.5881	0.6853	-0.471	0.286	-0.3961	0.6604	-1.04282	0.005634	-0.9757	0.06799	-0.0987945	0.9489
MVLG_06213	112.9	94.61	44.98	55.86	26.59	37.07	17.22	29.47	103.97	80.22	89.71	87.71	66.76	43.5	-0.8987	0.002214	-1.611	1.04e-06	-2.174	1.222e-10	-0.3141	0.3923	-0.6902	0.1429	-0.676076	0.2276	-1.275	0.002625	0.531123	0.2147	0.163938	0.9432	-0.5681	0.8991	1.28	0.002788	0.8616	0.2426	1.84721	1.02e-05	1.407	0.01799	0.380776	0.621
MVLG_06710	0.49	0.94	226.42	212.33	173.03	142.02	172.82	150.69	31.03	90.12	90.64	55.46	207.5	142.9	8.375	2.9e-122	7.836	5.272e-96	7.835	3.171e-90	6.474	5.375e-50	7.677	5.577e-48	-0.505827	0.2276	-0.5389	0.139	-1.96359	1.172e-09	-0.737387	0.1656	-0.01282	1	-1.383	6.983e-05	-0.2201	0.807	-1.36036	0.0001067	-0.2086	0.7529	-1.18408	0.005463
MVLG_01746	98.47	85.79	14.21	22.12	37.55	25.14	48.77	42.5	50.91	67.45	68.56	40.9	20.6	18.92	-2.201	1.604e-12	-1.483	4.744e-06	-0.9688	0.002024	-0.6806	0.04523	-1.975	2.382e-05	0.746803	0.2286	1.23	0.002842	1.45983	0.0003878	0.175896	0.939	0.5025	0.8904	0.784	0.08578	-0.5427	0.7422	0.294015	0.5827	-1.041	0.1669	1.2887	0.02537
MVLG_06587	39.3	34.15	56.77	57.77	108.21	74.23	168.46	153.14	86.1	109.78	97.88	13.09	112.08	50.96	0.7841	0.01208	1.388	1.236e-05	2.179	8.999e-13	1.323	0.0001526	1.108	0.0253	0.635606	0.2289	1.396	6.794e-05	0.480961	0.2773	0.285606	0.9858	0.7801	0.347	-0.08386	0.8822	-0.3461	0.5765	-0.851384	0.02899	-1.129	0.009614	0.248706	0.5437
MVLG_03991	9.09	5.43	20.36	42.08	61.46	41.76	70.19	52.93	38.97	70.86	65.88	29.65	40.88	17.63	2.255	4.12e-11	2.911	3.959e-17	3.144	8.039e-22	2.929	1.316e-15	2.161	7.294e-06	0.683816	0.2299	0.8871	0.03256	0.607151	0.173	-0.13696	0.9679	0.2219	1	-0.003887	0.9902	-0.8067	0.2852	-0.211745	0.6863	-1.025	0.09015	0.778803	0.16
MVLG_01280	65.92	67.01	63.65	61.41	43.08	34.4	20.87	23.49	33.79	19.21	28.82	136.65	65.98	59.9	0.05119	0.8906	-0.7008	0.05477	-1.562	9.985e-06	-1.422	2.108e-05	0.2454	0.5518	-0.716317	0.23	-1.608	0.0001178	-1.52337	6.282e-05	0.146886	0.9416	-0.8676	0.549	-0.7326	0.141	0.8933	0.2245	0.146976	0.8533	1.756	0.001677	-1.66688	0.0002687
MVLG_00384	190.77	162.63	371.2	331.26	580.05	454.95	732.85	530.66	693.55	596.23	562.12	531.28	581.27	320.2	1.142	2.369e-05	1.637	1.313e-08	1.9	1.313e-10	1.747	4.406e-07	1.536	0.0001316	0.529104	0.2304	0.7605	0.03074	0.552995	0.1645	0.355445	0.7833	0.2504	0.9957	0.09378	0.8751	-0.1543	0.9234	-0.141064	0.797	-0.4045	0.555	0.223601	0.7492
MVLG_07197	112.22	116.84	437.53	349.99	564.47	567.02	628.59	611	114.39	153.82	165.14	155.95	296.81	316.17	1.918	3.101e-13	2.387	5.641e-17	2.477	7.591e-17	0.229	0.5647	1.331	0.001113	0.506138	0.234	0.5638	0.1217	-1.74434	1.029e-07	-0.624811	0.3112	0.07792	1	-2.177	9.783e-11	-1.116	0.0177	-2.24397	3.337e-11	-1.198	0.006578	-1.08181	0.01503
MVLG_05479	0.15	0.35	68.83	103.05	50.45	58.96	36.9	49.81	6.46	9.13	18.42	49.87	75.66	131.44	8.473	2.333e-52	7.77	7.697e-29	7.358	3.241e-35	5.422	6.179e-26	8.586	8.566e-26	-0.668127	0.2347	-1.117	0.007322	-3.12225	2.354e-17	0.0866794	1	-0.422	0.9762	-2.379	1.338e-08	0.7675	0.4028	-1.95638	8.98e-07	1.176	0.07515	-3.18851	8.23e-13
MVLG_00381	71.58	43.15	205.34	261.99	158.34	153.75	107.53	119.88	91.55	117.51	104.64	55.71	236.76	389.7	2.189	1.998e-14	1.553	1.962e-06	1.054	0.001304	0.8705	0.01531	2.41	2.158e-08	-0.601947	0.2349	-1.133	0.002391	-1.37907	9.2e-05	0.182954	1	-0.5083	0.8734	-0.7036	0.09912	0.7921	0.3735	-0.185985	0.7204	1.293	0.02933	-1.51431	0.0009225
MVLG_01543	24.71	21.53	43.71	48.23	69.72	81.55	75.18	89.28	68.59	41.78	44.98	52.19	28.69	55.69	1.138	0.0009836	1.806	1.625e-07	1.87	6.634e-09	1.051	0.003116	1.001	0.04488	0.700376	0.2349	0.7316	0.1069	-0.137616	0.8206	-0.183315	0.9926	0.05337	1	-0.7688	0.08731	-0.8583	0.3507	-0.812081	0.05689	-0.9173	0.2233	0.0588635	0.9994
MVLG_03716	87.02	96.46	51.34	40	31.36	26.32	30.62	17.38	29.77	30.1	32.43	38.31	20.52	31.79	-0.8732	0.003271	-1.595	1.833e-06	-1.848	6.733e-09	-1.699	1.371e-07	-1.67	0.0002927	-0.685623	0.2349	-0.9678	0.01545	-0.879646	0.02502	-0.841375	0.3814	-0.2693	1	-0.1204	0.8495	-0.1299	0.9994	0.172655	0.7665	0.1586	0.8568	-0.0289228	0.9527
MVLG_05387	139.09	180.13	46.59	39.11	23.02	28.12	28.33	29.72	52.45	56.96	67.98	55.59	25.21	26.77	-1.766	1.579e-09	-2.561	3.632e-14	-2.434	8.241e-14	-1.547	1.465e-06	-2.367	2.855e-07	-0.757561	0.2349	-0.6649	0.1725	0.164791	0.7696	-0.647638	0.6979	0.1146	1	0.9964	0.03603	0.1365	0.9489	0.890388	0.04956	0.02137	0.9576	0.814898	0.266
MVLG_06079	84.68	61.1	359.18	322.16	208.88	267.24	145.3	233.58	27.87	39.67	54.02	126.3	316.78	382.01	2.371	8.172e-19	1.809	4.676e-10	1.423	1.795e-06	-0.9226	0.00536	2.122	1.649e-07	-0.524486	0.2349	-0.9433	0.00523	-3.35068	6.224e-24	-0.285477	0.7697	-0.395	0.9287	-2.751	1.399e-15	0.2523	0.8826	-2.35073	1.06e-11	0.6374	0.3561	-3.02993	3.114e-14
MVLG_00484	653.56	494.69	1984.32	2365.39	2959.16	3053.83	2790.98	2189.86	2483.25	791.43	697.93	1960.74	766.65	572.55	2.057	1.036e-13	2.561	7.024e-18	2.315	2.278e-14	1.639	2.217e-06	1.058	0.01412	0.539192	0.2351	0.2604	0.596	-0.457588	0.2632	-1.04132	0.108	-0.2604	0.9938	-0.9296	0.0156	-1.553	0.003696	-0.648591	0.1237	-1.29	0.01727	0.590606	0.3543
MVLG_00809	0.15	0.32	107.18	92.92	62.84	72.95	41.25	46.28	4.18	16.1	19.13	48.59	72.26	82.23	8.817	6.892e-82	8.208	1.633e-58	7.518	5.496e-54	5.727	4.991e-33	8.284	2.36e-31	-0.572311	0.2351	-1.296	0.000189	-3.15738	8.648e-21	-0.561709	0.4448	-0.7013	0.5301	-2.511	2.65e-12	0.0251	1	-1.80546	6.127e-07	0.7192	0.3208	-2.57399	6.935e-10
MVLG_00838	5.32	10.21	2.99	4.97	9.26	12.78	16.81	29.31	35.98	19.3	31.84	12.15	11.14	10.73	-0.8387	0.2108	0.579	0.3183	1.52	5.327e-05	1.743	1.265e-06	0.6114	0.3803	1.42092	0.2351	2.33	0.0001451	2.52946	7.952e-06	1.36812	0.3732	0.9288	0.5757	1.152	0.04357	-0.03234	1	0.215236	0.7822	-0.9846	0.2476	1.14997	0.0996
MVLG_01373	101.75	91.86	652.91	622.29	451.79	448.68	302.2	384.29	233.91	153.37	156.13	551.24	407.38	529.11	2.869	5.659e-26	2.313	2.968e-15	1.882	3.744e-10	0.8307	0.01866	2.458	1.397e-09	-0.520397	0.2351	-0.9835	0.003272	-2.08714	2.046e-10	-0.449198	0.6325	-0.4406	0.8749	-1.496	2.617e-05	0.09307	0.975	-1.04238	0.005607	0.5282	0.4343	-1.61339	9.23e-05
MVLG_06360	57.11	73.49	5.17	8.73	30.1	8.88	24.34	16.43	84.49	63.56	73.43	42.92	18.79	5.19	-3.093	2.825e-11	-1.684	7.912e-05	-1.57	2.12e-05	0.0964	0.8232	-1.96	0.001236	1.41071	0.2351	1.504	0.07186	3.13364	5.268e-09	1.05663	0.5498	0.09978	1	1.769	0.0004562	-0.3275	1	1.69008	0.0001503	-0.4156	0.9594	2.06745	0.002431
MVLG_00179	481.34	476.03	1637.01	1281.39	904.54	1180.28	549.72	807.92	194.65	248.5	340.66	369.58	631.63	1012.77	1.741	1.489e-11	1.214	1.416e-05	0.5472	0.07029	-1.005	0.002148	0.5964	0.1605	-0.488624	0.2357	-1.188	0.0001029	-2.80097	3.273e-18	-1.18479	0.004764	-0.6782	0.4002	-2.235	1.906e-11	-0.6752	0.2508	-1.54887	7.201e-06	-0.001515	1	-1.58799	6.461e-05
MVLG_01940	63.89	49.4	31.99	33.01	22.68	13.68	8.75	3.36	25.3	25.04	20.11	13.03	27.44	22.91	-0.655	0.05354	-1.56	6.41e-05	-3.006	8.778e-15	-1.372	3.611e-05	-1.093	0.01479	-0.866641	0.2357	-2.331	1.333e-06	-0.774075	0.08127	-0.477685	0.7283	-1.449	0.1736	0.17	0.8469	0.4026	0.8584	1.66009	0.0007865	1.876	0.01236	-0.259445	0.8465
MVLG_02018	0.13	0.51	6020.99	5808.76	3716.18	4708.42	1004.14	2811.79	61.15	87.27	294.96	1863.86	4069.08	6293.85	14.18	1.294e-158	13.65	6.235e-128	12.47	3.469e-107	8.81	6.548e-51	13.73	2.547e-65	-0.49129	0.2357	-1.705	9.815e-09	-5.45054	1.778e-54	-0.459668	0.5411	-1.19	0.008164	-4.88	6.855e-43	0.05101	1	-3.68761	2.658e-26	1.233	0.01191	-4.97506	6.518e-33
MVLG_00150	22.46	20.68	441.39	295.92	318.98	197.64	127.36	178.42	53.72	116.68	151.32	364.63	1426.97	2147.84	4.247	1.34e-45	3.66	1.426e-29	2.869	1.384e-18	2.322	1.1e-10	6.187	1.123e-38	-0.551734	0.2371	-1.373	6.234e-05	-1.98281	2.675e-09	1.89977	1.345e-05	-0.7963	0.3728	-1.358	0.0002249	2.464	1.125e-07	-0.556463	0.1907	3.251	3.941e-12	-3.85329	6.79e-22
MVLG_05995	92.82	143.35	28.4	33.06	68.77	33.29	96.97	64.66	99.61	105.33	123.23	118.17	54.09	37.66	-1.816	1.446e-09	-1.16	0.0002358	-0.5062	0.1056	-0.2411	0.5159	-0.9863	0.04561	0.683828	0.2379	1.308	0.0005248	1.51847	0.0001118	0.776169	0.2767	0.6417	0.6416	0.9053	0.03401	0.127	0.9051	0.280629	0.5842	-0.5045	0.6319	0.734233	0.2759
MVLG_00409	760.44	842.96	35.74	29.52	93.76	51.55	72.07	86.1	193.86	93.35	116.96	210.37	61.86	61.61	-4.452	1.763e-34	-3.373	3.153e-21	-3.279	1.258e-21	-2.533	5.36e-15	-3.179	7.781e-11	1.09964	0.2401	1.165	0.06937	1.87065	0.0001644	1.20777	0.24	0.08513	1	0.8304	0.1143	0.14	0.9059	0.755236	0.1332	0.04992	0.9465	0.64956	0.5304
MVLG_02272	112.5	116.11	11.4	19.89	7.57	7.31	8.67	25.94	19.28	22.41	17.09	23.15	8.19	13.17	-2.73	2.453e-16	-3.86	4.654e-21	-2.851	5.136e-15	-2.647	3.309e-16	-3.246	6.074e-10	-1.08487	0.2401	-0.1281	1	0.0219369	1	-0.561836	0.9131	1.003	0.5763	1.191	0.06876	0.5468	0.7466	0.160029	0.9292	-0.4996	0.7035	0.593816	0.6667
MVLG_02389	38.36	87.62	12.43	9.72	20.3	28.4	28.95	29.14	42.03	41.91	68.36	51.08	24.61	18.9	-2.385	2.912e-09	-1.297	0.001078	-1.093	0.002183	-0.4011	0.264	-1.249	0.0272	1.10884	0.2401	1.282	0.03501	1.92934	0.0001236	1.07094	0.3652	0.1886	1	0.8799	0.1025	-0.01477	1	0.699606	0.1703	-0.2029	1	0.848555	0.3105
MVLG_02609	37.31	48.7	29.52	23.52	8.33	15.99	9.91	6.57	46.35	53.88	31.16	19.25	11.8	14.1	-0.5599	0.163	-1.729	0.0003493	-2.258	9.592e-08	-0.04883	0.8985	-1.564	0.01264	-1.12134	0.2401	-1.681	0.006462	0.453238	0.4183	-1.03952	0.497	-0.5397	1	1.656	0.004316	0.09808	1	2.22277	1.019e-05	0.6521	0.6706	1.52263	0.03266
MVLG_06161	245.58	209.42	337.35	484.05	250.07	281.93	148.29	157.71	182.21	100.79	134.02	260.35	208.47	358.7	1.017	0.0004936	0.3583	0.3213	-0.4674	0.2006	-0.6004	0.09763	0.614	0.2175	-0.623941	0.2401	-1.482	7.966e-05	-1.66885	4.119e-06	-0.44582	0.6733	-0.8363	0.4796	-0.9717	0.0259	0.1951	0.9498	-0.121462	0.8599	1.028	0.1265	-1.19245	0.01762
MVLG_00937	45.99	45.74	139.79	155.58	105	96.96	65.78	84.2	51.4	63.87	63.8	82.8	172.73	231.43	1.827	4.736e-11	1.221	0.0001071	0.7385	0.02162	0.2931	0.4597	2.069	7.382e-07	-0.572142	0.2409	-1.088	0.002934	-1.59237	3.643e-06	0.201148	0.9796	-0.4908	0.8809	-0.9468	0.01748	0.7838	0.328	-0.449028	0.3273	1.265	0.02483	-1.75258	3.799e-05
MVLG_06649	5.14	7.26	88.86	90.67	39.3	48.63	12.7	25.48	10.99	13.72	13.76	62.97	106.93	97.06	4.005	1.393e-15	2.934	6.325e-05	1.529	0.04117	1.239	0.00659	4.325	7.451e-13	-1.02606	0.2426	-2.448	0.000198	-2.82655	4.975e-09	0.276562	0.9891	-1.39	0.5897	-1.718	0.01437	1.312	0.2601	-0.308968	0.6836	2.682	0.0008865	-3.0742	3.24e-08
MVLG_00028	44.56	47.3	10.12	11.05	17.55	19.77	22.83	15.58	31.68	36.87	33.73	25.65	10.71	9.97	-1.984	1.96e-09	-1.22	0.0004039	-1.196	0.0001917	-0.5675	0.1032	-1.891	0.0002414	0.794423	0.2431	0.788	0.1422	1.35926	0.001805	0.0434249	1	0.006839	1	0.6328	0.204	-0.7229	0.6168	0.644598	0.1629	-0.7176	0.5246	1.3175	0.04221
MVLG_05889	55.47	47.23	72.68	85.87	148.75	104.67	160.79	117.28	94.45	98.51	123.1	43.08	107.36	78.1	0.7762	0.01621	1.387	2.019e-05	1.51	1.43e-06	0.9901	0.005202	0.9278	0.06492	0.641366	0.2443	0.7344	0.08617	0.157303	0.7816	0.110599	1	0.1104	1	-0.4128	0.3797	-0.5203	0.4929	-0.507285	0.2625	-0.6271	0.296	0.0847374	0.8558
MVLG_03100	22.43	28	79.66	117.93	131.32	160.49	144.22	146.58	152.01	141	153.04	128.25	123.13	74.19	2.103	7.484e-14	2.616	3.826e-18	2.561	6.049e-17	2.428	7.156e-12	2.128	3.123e-07	0.546082	0.2453	0.4566	0.2737	0.268418	0.5568	-0.0191539	1	-0.06813	1	-0.2044	0.6752	-0.5435	0.4985	-0.125317	0.8187	-0.4789	0.5024	0.310156	0.6599
MVLG_00336	0.16	0.74	48.23	85.64	73.94	134.92	49.77	170.67	240.84	435.79	308.8	122.54	98.57	135.72	7.298	1.073e-41	7.905	1.716e-48	7.869	9.279e-57	9.391	8.609e-71	8.082	4.396e-28	0.639509	0.2476	0.5645	0.1794	2.02244	1.04e-07	0.747694	0.3697	-0.04027	1	1.456	0.0002578	0.1281	0.9714	1.48786	0.0002164	0.1388	0.9438	1.30312	0.004002
MVLG_03701	27.63	50.64	82.49	63.38	113.88	114.6	44.96	75.76	15.63	16.33	26.23	39.44	141.56	130.46	1.026	0.001293	1.619	5.264e-07	0.6114	0.07207	-1.068	0.001693	1.764	7.266e-05	0.626981	0.2476	-0.4148	0.5118	-2.14821	1.357e-08	0.694917	0.5429	-1.013	0.1866	-2.704	1.269e-12	0.0764	1	-1.69246	1.791e-05	1.066	0.1282	-2.80671	1.461e-10
MVLG_01043	24.87	14.46	69.3	63.53	46.79	44.92	40.75	38.04	92.1	90.12	59.68	74.73	65.84	68.81	1.902	4.986e-12	1.311	2.338e-05	1.048	0.0008092	1.892	5.307e-08	1.879	4.961e-06	-0.555183	0.2485	-0.8497	0.02008	-0.0642064	0.8966	-0.0606652	1	-0.2741	0.9938	0.5621	0.2057	0.5153	0.5469	0.850524	0.04191	0.7885	0.1987	0.0225643	0.9977
MVLG_01604	622.09	585.63	300.61	302.85	192.17	228.46	160.58	190.79	214.96	100.92	133.98	347.8	215.37	224.46	-0.8559	0.001583	-1.424	1.239e-06	-1.734	9.438e-09	-2.116	3.417e-11	-1.187	0.003093	-0.532402	0.2509	-0.8758	0.01368	-1.3063	0.0001589	-0.372065	0.7877	-0.321	0.9799	-0.7027	0.08649	0.1866	0.8863	-0.36938	0.4377	0.5022	0.4665	-0.92121	0.04676
MVLG_04965	155.43	127.88	24.02	14.87	25.88	42.58	20.33	32.49	13.53	16.07	15.46	42.02	40.12	28.02	-2.719	2.125e-16	-1.947	1.033e-08	-2.44	1.37e-12	-3.303	1.182e-23	-1.878	2.108e-05	0.803965	0.2509	0.2781	0.6583	-0.641239	0.215	0.79413	0.4754	-0.4996	0.9762	-1.379	0.002489	0.006193	1	-0.88194	0.05347	0.4836	0.668	-1.41969	0.007561
MVLG_06160	392.08	537.02	74.5	79.27	131.96	114.63	132.4	150.23	81.76	78.57	81.09	294.76	92.65	73.62	-2.458	5.939e-17	-1.835	2.592e-09	-1.675	5.027e-08	-2.591	5.258e-16	-1.928	2.437e-05	0.654264	0.2527	0.7811	0.06525	-0.188654	0.7021	0.475702	0.5969	0.1488	1	-0.7724	0.06969	-0.1374	1	-0.911278	0.02293	-0.2858	0.9085	-0.684795	0.1553
MVLG_04649	0.11	0.15	299.4	267.04	161.37	234.52	85.15	157.76	24.38	33.53	41.38	253.03	292.4	297.98	11.14	1.163e-102	10.58	1.904e-78	9.805	2.014e-69	7.838	2.178e-45	11.07	1.051e-44	-0.519218	0.2531	-1.33	5.413e-05	-3.37308	7.042e-24	-0.0784067	0.9907	-0.7846	0.3234	-2.778	1.481e-15	0.4605	0.6085	-1.99213	1.859e-08	1.23	0.01808	-3.26801	4.372e-16
MVLG_05365	24.22	33.12	5.79	6.37	2.55	1.65	2.94	2.02	7.46	11.05	7.33	0	7.28	13.01	-2.108	7.318e-08	-3.703	2.333e-12	-3.43	2.142e-15	-1.836	2.147e-08	-1.584	0.0001267	-1.52434	0.2542	-1.302	0.1278	0.209923	0.8219	0.469432	0.9926	NA	NA	1.842	0.02326	2	0.2025	1.59943	0.008337	1.779	0.1278	-0.244628	1
MVLG_06406	33.16	32.45	58.65	54.42	95.59	87.67	63.55	67.04	41.76	30.57	25.09	19.65	42.74	23.95	0.9302	0.005596	1.569	3.509e-06	1.038	0.001984	-0.1192	0.7933	0.1734	0.9029	0.671211	0.2542	0.1095	0.9011	-1.10281	0.009426	-0.794945	0.3379	-0.5406	0.8537	-1.704	2.747e-05	-1.454	0.01672	-1.15073	0.006022	-0.9207	0.1727	-0.261034	0.8645
MVLG_06996	566.13	460.74	869.04	785.27	1230.63	1156.65	1332.27	977.68	1078.97	715.98	515.15	1065.13	700.07	489.41	0.8613	0.00156	1.336	3.369e-06	1.273	1.766e-05	0.6572	0.06596	0.6492	0.1256	0.510108	0.2549	0.4158	0.3085	-0.252138	0.5594	-0.251056	0.8923	-0.07557	1	-0.6931	0.07808	-0.7359	0.2789	-0.600626	0.1483	-0.6598	0.2947	0.0163739	1
MVLG_02385	27.46	23.11	67.71	59.75	41.49	42.32	46.71	51.49	47.58	41.11	59.99	102.81	58.54	44.47	1.475	4.828e-07	0.8151	0.01999	0.9921	0.002178	0.8556	0.01654	1.318	0.002114	-0.623176	0.2565	-0.4795	0.3039	-0.671766	0.08941	-0.200742	0.9836	0.1661	1	0.02482	0.9935	0.4503	0.628	-0.132582	0.8138	0.2819	0.7171	-0.468624	0.4003
MVLG_02035	122.53	158.6	27.38	31.71	22.14	13.65	24.63	15.14	56.04	44.81	80.09	55.3	61.99	44.78	-2.12	9.8e-13	-2.91	2.672e-17	-2.742	3.057e-17	-1.353	2.897e-05	-1.297	0.001405	-0.755145	0.2581	-0.6185	0.1979	0.713663	0.09759	0.776032	0.3548	0.1522	1	1.546	0.0005854	1.548	0.0156	1.41451	0.0006174	1.413	0.0153	-0.0423462	0.9831
MVLG_07253	14.82	12	18.02	29.16	60.48	32.13	68.26	39.99	75.77	96.43	64.04	0	54.48	77.66	0.9712	0.04028	1.878	1.275e-05	2.128	1.721e-09	2.52	4.872e-12	2.307	1.536e-05	0.9321	0.2581	1.155	0.03638	1.48665	0.001378	1.28341	0.2656	0.2344	1	0.6211	0.2403	0.3651	0.9719	0.409402	0.4253	0.1467	0.9937	0.234893	0.46
MVLG_00869	215.83	235.44	70.41	66.3	29.86	57.71	20.06	38	62.48	53.5	47.81	59.61	44.6	54.18	-1.587	1.946e-08	-2.267	1.347e-12	-2.993	5.976e-19	-2.172	1.12e-11	-2.058	6.794e-07	-0.642408	0.2586	-1.406	0.000743	-0.638358	0.1131	-0.515611	0.6733	-0.732	0.6986	0.07596	0.9156	0.1467	0.952	0.80443	0.103	0.8514	0.2476	-0.102861	0.9064
MVLG_06968	1304.66	991.59	2034.44	2765.3	3556.22	3215.75	2305.83	2874.61	2356.35	1138.63	911.76	2707.69	908.92	705.31	1.234	2.44e-06	1.687	2.043e-09	1.287	1.16e-05	0.4724	0.1972	0.2963	0.4642	0.485795	0.2597	0.0546	0.9382	-0.808331	0.02359	-0.977269	0.09644	-0.4095	0.8904	-1.226	0.0005304	-1.428	0.003805	-0.799672	0.03813	-1.021	0.0596	0.170293	0.8813
MVLG_05771	192.74	209.56	45.91	39.08	11.05	27.92	15.97	26.01	75.35	56.92	48.76	34.55	32.87	27.64	-2.088	1.589e-09	-3.248	6.515e-14	-3.301	1.596e-16	-1.759	9.524e-08	-2.475	9.186e-07	-1.11167	0.26	-1.204	0.1063	0.275556	0.6519	-0.428333	0.8888	-0.062	1	1.47	0.01493	0.6937	0.6907	1.53415	0.005194	0.7412	0.5675	0.735665	0.3397
MVLG_00466	0.87	0.85	141.73	140.04	82.27	103.59	31.88	96.37	14.28	12.12	13.07	108.96	156.85	142.06	7.471	8.976e-61	6.823	8.099e-38	6.137	7.621e-37	3.84	8.526e-17	7.494	3.957e-28	-0.611054	0.2613	-1.336	0.001281	-3.69226	5.168e-23	-0.0107582	1	-0.6851	0.7787	-3.006	2.314e-13	0.6132	0.54	-2.33597	1.157e-08	1.255	0.05028	-3.64086	4.314e-16
MVLG_02882	176.09	134.09	36.03	35.92	16.81	26.24	21.76	23.52	72.54	82.8	79.46	35.61	46.1	50.97	-1.962	6.176e-11	-2.75	3.296e-15	-2.743	3.488e-16	-1.085	0.0009375	-1.614	6.954e-05	-0.749253	0.2613	-0.7777	0.1206	0.820323	0.05377	0.3053	0.9177	-0.006087	1	1.644	0.0002699	1.067	0.2223	1.65806	9.751e-05	1.07	0.1237	0.542856	0.3475
MVLG_06550	192.7	128.54	352.34	394.35	269.47	266.57	152.05	253.89	155.44	207.63	175.22	184.08	410.98	394.4	1.366	1.995e-07	0.8322	0.004517	0.3855	0.2194	0.06441	0.8892	1.216	0.002934	-0.499388	0.2613	-0.9781	0.003446	-1.36087	4.782e-05	-0.187963	0.8888	-0.4543	0.859	-0.7881	0.04003	0.3245	0.792	-0.325468	0.48	0.7701	0.2125	-1.13242	0.009237
MVLG_03541	37.64	39.23	9.38	7.63	22.59	12.02	19.05	18.78	27.54	39.66	38.7	20.71	21.37	17.12	-2.04	1.331e-07	-1.084	0.005581	-0.9885	0.005566	-0.2196	0.549	-0.8685	0.08668	0.979332	0.2615	1.046	0.09473	1.76083	0.0002751	1.11464	0.3343	0.0855	1	0.8458	0.1037	0.1552	0.992	0.769838	0.1214	0.06824	1	0.656695	0.3386
MVLG_01814	183.77	163.26	139.03	140.44	98.56	95.28	52.1	51.99	99.54	90.98	99.15	81.2	127.95	152.54	-0.1709	0.5832	-0.7549	0.01523	-1.695	6.262e-08	-0.9587	0.003805	-0.3265	0.4052	-0.549145	0.262	-1.521	8.578e-06	-0.841714	0.02184	-0.19493	0.8876	-0.9506	0.1752	-0.22	0.6612	0.3674	0.7765	0.743236	0.09567	1.314	0.0191	-0.610542	0.2901
MVLG_06714	190.52	162.98	80.27	61.78	47.78	48.63	79.91	70.3	165.08	136.65	135.63	117.65	89.19	61.01	-1.177	1.922e-05	-1.79	4.962e-09	-1.192	8.179e-05	-0.4167	0.2433	-1.013	0.01573	-0.57599	0.262	-0.01049	1	0.710065	0.07206	0.12347	0.9679	0.5848	0.7095	1.357	0.0006948	0.7243	0.3203	0.786362	0.06035	0.1408	0.8794	0.600092	0.303
MVLG_02932	55.44	56.73	77.16	77.89	111.82	127.59	163.56	138.17	55.1	51.91	76.56	97.58	27.87	38.08	0.6105	0.05868	1.187	0.0002371	1.485	1.531e-06	0.06356	0.898	-0.4126	0.6797	0.610309	0.2627	0.8754	0.02751	-0.601564	0.1502	-1.06953	0.3306	0.2831	1	-1.14	0.004166	-1.645	0.02563	-1.41132	0.0001361	-1.925	0.00229	0.459175	0.7513
MVLG_06816	100.7	104.89	18.33	18.19	32.98	29.14	29.77	23.81	20.2	22.34	19.98	17.76	22.92	22.74	-2.357	6.374e-14	-1.65	4.222e-07	-1.887	3.299e-09	-2.423	4.47e-14	-2.107	7.77e-07	0.737472	0.2627	0.4708	0.4371	-0.123305	0.8234	0.204076	0.9875	-0.2501	1	-0.7916	0.08269	-0.5162	0.6519	-0.525459	0.2789	-0.2616	0.8191	-0.302022	0.7462
MVLG_02329	95.72	80.89	68.33	89.18	56.58	50.37	39.73	36.73	30.99	31	37.42	20.75	56.84	67.29	-0.02226	0.9581	-0.6407	0.05418	-1.161	0.0003066	-1.522	2.588e-06	-0.5508	0.1472	-0.585059	0.2631	-1.138	0.002336	-1.55762	1.092e-05	-0.568622	0.419	-0.5315	0.8533	-0.8987	0.0329	0.02674	1	-0.354211	0.4798	0.5567	0.5777	-0.949117	0.08536
MVLG_03839	10.19	10.35	204.6	150.12	138.93	104.45	215.23	141.44	36.48	114.07	121.31	74.44	146.17	164.07	4.253	4.501e-43	3.645	2.135e-26	4.179	1.049e-35	3.115	5.147e-17	3.922	1.448e-17	-0.572055	0.2634	-0.06843	0.9179	-1.19891	0.0006125	-0.367969	0.6979	0.5207	0.8307	-0.5523	0.1982	0.2159	0.9441	-1.06071	0.004707	-0.3003	0.6445	-0.793206	0.1415
MVLG_06585	73.08	69.87	389.66	268.88	215.03	232.2	72.9	180.58	19.53	14.18	29.17	106.28	127.55	181.48	2.365	7.844e-17	1.752	4.29e-08	0.8225	0.01221	-1.752	3.38e-07	1.261	0.00648	-0.574106	0.2634	-1.54	3.45e-05	-4.16715	6.266e-30	-1.14232	0.0324	-0.9305	0.2884	-3.518	2.345e-19	-0.5516	0.4993	-2.59607	5.15e-11	0.3465	0.8019	-2.99459	8.75e-11
MVLG_04853	55.82	46.39	291.23	303.54	206.92	216.09	172.37	188.14	50.26	69.48	70.43	77.64	129.06	183.73	2.685	6.719e-23	2.14	4.457e-13	1.865	6.387e-10	0.2283	0.576	1.578	0.0001905	-0.509627	0.2639	-0.8174	0.01911	-2.51532	2.304e-14	-1.14537	0.01137	-0.2861	0.9816	-1.932	3.144e-08	-0.6225	0.3273	-1.63622	3.714e-06	-0.3413	0.5875	-1.33099	0.00312
MVLG_01980	108.38	87.91	243.33	304.6	208.12	182.26	146.26	169.52	114.28	97.71	141.47	131.65	258.76	322.82	1.628	1.298e-09	1.079	0.0003046	0.7331	0.01767	0.1724	0.6749	1.499	0.0002889	-0.516141	0.2649	-0.8937	0.01061	-1.5101	7.439e-06	-0.168064	0.8964	-0.3547	0.9719	-0.921	0.01672	0.3592	0.7767	-0.555696	0.1929	0.7085	0.296	-1.30456	0.002932
MVLG_04806	1.98	1.32	4246.09	4242.71	4774.38	6917.55	539.41	2216.71	119.06	80.06	387.63	1623.29	4977.26	2582.43	11.5	3.792e-186	11.93	1.444e-168	9.807	5.932e-121	6.818	3.806e-53	10.98	2.236e-78	0.465444	0.2649	-1.69	8.848e-09	-4.73855	2.446e-44	-0.560469	0.4044	-2.133	1.597e-08	-5.124	9.025e-47	-1.003	0.03978	-2.98568	1.158e-18	1.123	0.02232	-4.16407	1.49e-25
MVLG_01821	211.55	197.91	37.16	20.59	61.55	88.63	69.7	74.85	275.78	125.63	120.42	85.88	36.17	16.5	-2.632	2.308e-08	-1.301	0.003837	-1.388	0.0003981	-0.08358	0.8756	-2.296	0.0003927	1.34006	0.2671	1.229	0.1522	2.50013	4.269e-06	NA	NA	-0.0999	1	1.205	0.02849	-1.038	0.5844	1.32034	0.00651	-0.947	0.5675	2.23724	0.00194
MVLG_04403	27.67	18.68	8.04	5.51	4.08	1.58	1.69	5.17	18.2	15.99	16.37	0	4.85	6.73	-1.631	3.131e-05	-2.955	5.075e-09	-2.974	9.58e-11	-0.5934	0.09644	-2.038	1.034e-05	-1.2656	0.2671	-1.327	0.1826	0.982903	0.0599	-0.444176	0.8225	-0.01883	1	2.343	0.0001773	NA	NA	2.35098	4.056e-05	0.8186	0.9069	1.45586	0.004982
MVLG_06417	67.28	59.73	915.58	865.29	601.38	688.68	313.79	449.49	97.24	85.73	111.73	1140.83	556.24	400.28	3.952	3.643e-45	3.438	5.529e-31	2.635	2.394e-18	0.5241	0.1545	3.435	7.887e-17	-0.477096	0.2676	-1.312	2.113e-05	-3.48039	4.605e-26	-0.549975	0.497	-0.8129	0.204	-2.929	4.678e-18	-0.04219	1	-2.10648	7.61e-10	0.763	0.1717	-2.91191	9.733e-14
MVLG_04893	204.48	187.06	616.98	584.34	396.68	470.69	283.08	345.05	194.33	155.98	184.96	490.26	404.25	463.28	1.758	1.584e-11	1.241	1.293e-05	0.7271	0.01585	-0.2514	0.4989	1.276	0.00129	-0.480577	0.2689	-1.027	0.001453	-2.06089	2.112e-10	-0.519534	0.5007	-0.5251	0.7095	-1.507	1.459e-05	-0.01581	1	-0.97086	0.009478	0.5035	0.4475	-1.51645	0.0001969
MVLG_04898	28.98	30.25	63.93	70.88	100.92	91.07	133.47	107.08	205.54	160.34	143.09	113.97	76.62	61.13	1.318	5.441e-07	1.768	4.031e-10	2.048	3.374e-12	2.337	2.608e-11	1.479	0.0001658	0.483147	0.2691	0.7304	0.03285	0.967166	0.008413	0.122964	0.9666	0.2676	0.9822	0.5543	0.1866	-0.3345	0.7422	0.301547	0.54	-0.6041	0.3276	0.864285	0.06235
MVLG_00180	168.42	149.82	388.19	415.11	622.45	524.23	708.37	590.1	235.18	389.18	381.52	329.56	397.69	357.59	1.479	1.931e-08	1.931	9.923e-12	2.076	1.882e-12	0.9914	0.004482	1.298	0.001257	0.485301	0.2696	0.5983	0.09829	-0.547994	0.1442	-0.220259	0.8862	0.1332	1	-0.9599	0.00876	-0.6883	0.2622	-1.08169	0.002973	-0.8229	0.1095	-0.293304	0.6606
MVLG_04582	446.45	394.58	744.15	659.94	1026.15	979.28	780.69	697.84	1220.99	842.19	849.79	556.29	801.73	678.66	0.8999	0.0008399	1.359	1.975e-06	0.8926	0.002984	1.207	0.0004761	0.9218	0.02888	0.494274	0.2696	-0.003614	1	0.258912	0.5595	-0.0159862	1	-0.4781	0.8003	-0.165	0.7396	-0.4946	0.4842	0.327898	0.502	-0.01888	0.9903	0.306521	0.5902
MVLG_01641	141.02	194.48	15.44	38.63	12.71	4	28.08	33.2	254.14	149.9	201.62	159.86	64.34	13.4	-2.496	1.431e-10	-4.253	1.632e-15	-2.419	3.475e-10	0.2691	0.4854	-1.49	0.008098	-1.67573	0.2702	0.07263	0.9688	2.71238	5.11e-09	0.942546	0.3652	1.787	0.3082	4.507	4.541e-14	2.627	0.01034	2.69631	3.319e-09	0.8661	0.3276	1.76702	0.004128
MVLG_03218	304.01	277	1022.86	1179.9	822.95	754.42	551.05	731.13	477.96	451.81	460.81	785.04	576.66	780.56	2.086	5.875e-15	1.551	1.064e-07	1.226	4.395e-05	0.7392	0.03783	1.491	0.0002485	-0.500447	0.2702	-0.858	0.01322	-1.40143	3.103e-05	-0.634546	0.3646	-0.3346	0.9762	-0.8287	0.03175	-0.1145	0.9531	-0.483371	0.2672	0.2145	0.8347	-0.739112	0.1327
MVLG_04788	104.41	64.52	230.38	302.38	348.29	411.71	393.16	455.64	289.04	338.63	343.47	354.58	321.74	272.9	1.811	1.58e-11	2.274	4.328e-15	2.387	1.52e-15	1.857	8.698e-08	1.98	8.061e-07	0.498297	0.2702	0.5777	0.1199	-0.0125062	0.9781	0.131574	0.9765	0.1013	1	-0.4365	0.3022	-0.3446	0.7218	-0.527821	0.2093	-0.4506	0.5005	-0.116768	0.8873
MVLG_04914	43.81	60.74	21.53	14.24	10.44	9.2	14.41	15.79	56.16	69.04	61.93	26.06	23.69	22.27	-1.421	1.301e-05	-2.343	1.876e-09	-1.781	2.767e-07	0.1244	0.7776	-1.076	0.02133	-0.880879	0.2702	-0.3571	0.6248	1.49027	0.0003223	0.298043	0.9021	0.5481	0.9652	2.448	1.409e-07	1.196	0.1973	1.90531	6.888e-06	0.6461	0.482	1.21134	0.02246
MVLG_05043	646.74	398.89	1987.32	2129.75	3046.14	2745.87	2459.58	2103.81	194.42	558.51	232.55	1617.87	507.95	242.64	2.162	4.952e-16	2.611	1.776e-19	2.263	2.514e-14	-0.4193	0.2296	0.4127	0.2887	0.483471	0.2702	0.1041	0.8549	-2.64924	5.264e-16	-1.79273	0.0002526	-0.3595	0.9491	-3.06	1.741e-19	-2.234	3.545e-06	-2.68939	2.785e-15	-1.872	0.000168	-0.861105	0.05764
MVLG_06007	734.27	570.13	1452.82	1842.13	2286.18	2330.87	2197.73	2267.26	2101.28	2114.79	1916.39	2188.23	1531.76	1387.14	1.488	8.931e-09	1.923	6.829e-12	1.837	3.164e-10	1.587	4.13e-06	1.453	0.0001851	0.467984	0.2704	0.3496	0.3836	0.0417828	0.9444	-0.0712971	1	-0.09705	1	-0.3533	0.4124	-0.5158	0.4689	-0.2439	0.6147	-0.4232	0.5192	0.142066	0.8565
MVLG_06392	16.1	14.66	20.99	31.47	54.69	26.86	50.48	35.15	24.93	31.87	28.05	31.52	31.84	21.9	0.9085	0.002942	1.466	3.163e-06	1.522	8.423e-07	0.7427	0.03948	0.9216	0.04267	0.58496	0.2715	0.6122	0.1561	-0.226769	0.6187	-0.0314371	1	0.04584	1	-0.7407	0.07394	-0.5979	0.4854	-0.769155	0.05924	-0.6376	0.3562	-0.169864	0.8394
MVLG_02667	242.8	281.79	59.65	65.32	25.96	53.94	19.62	41.08	86.18	149.72	123.92	35.76	26.93	54.18	-1.935	8.534e-12	-2.616	4.125e-16	-3.156	6.731e-21	-1.225	0.00015	-2.639	1.609e-10	-0.644787	0.2753	-1.223	0.004836	0.647783	0.121	-0.749614	0.4067	-0.5447	0.9406	1.366	0.001243	-0.08522	0.9957	1.90236	5.682e-06	0.4291	0.7195	1.42003	0.003371
MVLG_02673	14.52	12.83	34.53	31.93	26.44	17.12	18.8	14.56	32.36	31.39	24.43	53.69	29.67	35.6	1.418	2.921e-06	0.7423	0.04534	0.3448	0.3718	0.9595	0.006958	1.452	0.000838	-0.640876	0.276	-1.068	0.008524	-0.513656	0.2202	-0.0111933	1	-0.4088	0.9762	0.2003	0.7472	0.6571	0.4106	0.628429	0.1874	1.075	0.07281	-0.492295	0.3855
MVLG_06395	14.73	14.92	26.35	17.21	43.08	41.21	45.43	51.91	168.22	138.6	157.53	141.18	97.33	62.02	0.7035	0.1581	1.597	0.0003025	1.751	1.607e-06	3.327	4.381e-19	2.723	3.902e-09	0.920045	0.2764	1.043	0.06068	2.57176	5.802e-09	1.96193	0.002047	0.1433	1	1.715	0.0001297	1.064	0.1957	1.57951	0.0001919	0.9165	0.1928	0.609766	0.3625
MVLG_05276	60.67	54.11	86.98	108.35	174.51	142.5	188.52	136.85	133.19	118.94	112.21	149.25	56.09	59	0.925	0.006974	1.565	5.036e-06	1.604	6.697e-07	1.101	0.001915	0.4072	0.3946	0.671056	0.2766	0.6798	0.1573	0.119888	0.8477	-0.563678	0.8312	0.02472	1	-0.4813	0.3193	-1.206	0.1801	-0.487709	0.3082	-1.222	0.1079	0.690032	0.4294
MVLG_03216	40.18	32.08	262.79	310.15	349.65	456.32	277.97	403.72	646.32	294.29	321.99	747.08	381.01	452.76	3.131	7.676e-30	3.579	1.185e-32	3.286	1.861e-26	3.403	1.392e-20	3.875	4.026e-20	0.483098	0.2771	0.1568	0.7553	0.225553	0.6156	0.707241	0.2732	-0.3035	0.9762	-0.1867	0.7022	0.2524	0.8141	0.129992	0.8277	0.5484	0.3815	-0.465828	0.376
MVLG_04187	34.98	23.64	65.47	60.09	103.39	79.08	117.27	73.89	104.8	147.37	132.5	93.33	95.94	78.2	1.241	5.849e-06	1.716	3.903e-09	1.748	4.866e-09	1.996	9.771e-09	1.658	4.208e-05	0.508445	0.2781	0.51	0.1985	0.696408	0.07432	0.379345	0.7564	0.01952	1	0.2597	0.6024	-0.1096	0.9609	0.2549	0.6188	-0.1264	0.905	0.345885	0.5754
MVLG_01179	98.03	111.48	30.18	21.08	19.26	8.43	25.71	26.28	32.59	32.62	22.55	32.29	31.25	21.99	-1.892	1.436e-08	-2.852	1.244e-12	-1.975	1.103e-08	-1.938	2.917e-09	-1.793	0.0001418	-0.917287	0.2783	-0.08014	0.9922	-0.101261	0.877	0.0546334	1	0.862	0.7504	0.8963	0.145	0.9884	0.3737	0.0398558	0.9745	0.1278	0.9702	-0.128865	0.9158
MVLG_04901	367.31	510.62	12.72	40.56	12.22	11.7	4.97	15.41	333.28	362.36	483.73	340.11	164.03	8.18	-3.91	5.254e-32	-5.116	5.879e-36	-5.65	1.782e-41	-0.2162	0.5611	-1.695	0.0001915	-1.15943	0.2784	-1.728	0.02736	3.63332	8.514e-18	2.14998	8.133e-05	-0.5278	1	4.882	1.173e-22	3.34	1.74e-07	5.40565	1.599e-26	3.839	2.961e-09	1.45957	0.005425
MVLG_06063	1.03	0.39	5926.91	5860.11	3204.71	5192.46	274.83	2753.98	145.93	11.05	1275.75	0	2610.58	1969.58	13.11	2.822e-145	12.61	8.244e-117	11.07	9.297e-91	9.499	2.812e-63	11.51	2.606e-48	-0.466721	0.2784	-2.043	1.384e-11	-3.68167	3.763e-29	-1.61798	8.499e-06	-1.546	0.0002239	-3.132	1.249e-20	-1.141	0.007737	-1.59081	5.273e-06	0.3857	0.729	-2.03718	5.708e-07
MVLG_02199	32.74	60.5	35.58	45	23.56	27.99	28.03	22.04	148.75	106.11	182.49	98.13	72.11	52.55	-0.08834	0.8125	-0.7842	0.03276	-0.8522	0.01095	1.5	1.465e-05	0.6229	0.1592	-0.661585	0.2801	-0.7634	0.09286	1.53626	6.041e-05	0.66119	0.444	-0.08418	1	2.272	4.236e-08	1.345	0.03539	2.37261	2.9e-09	1.438	0.009105	0.883686	0.09413
MVLG_05895	60.04	65.26	63.64	64.03	75.61	119.97	141.14	210.45	39.31	34.44	27.45	17.45	29.97	62.29	0.1674	0.6375	0.7429	0.02511	1.525	5.425e-07	-0.9919	0.003699	-0.4388	0.3295	0.609987	0.2801	1.357	0.0001649	-1.21469	0.002301	-0.649464	0.4684	0.77	0.4006	-1.754	7.117e-06	-1.241	0.04281	-2.51726	1.846e-12	-2.02	2.776e-05	-0.534261	0.525
MVLG_01956	37.99	30.92	51.83	60.73	87.49	76.55	86.92	73.55	80.52	136.95	85.39	53.22	48.95	36.04	0.8476	0.002568	1.33	6.332e-06	1.258	2.785e-05	1.419	4.095e-05	0.437	0.3486	0.514764	0.2804	0.4119	0.3368	0.508393	0.2165	-0.452158	0.6874	-0.08298	1	0.06596	0.9228	-0.9459	0.1317	0.161753	0.7813	-0.8627	0.1387	0.989331	0.04086
MVLG_00754	49.24	45.49	92.52	99.32	49.48	83.65	44.14	68.31	27.53	39.44	38.55	36.48	43.24	50.84	1.155	2.479e-05	0.5892	0.06383	0.2681	0.4098	-0.5452	0.1161	0.02	1	-0.529002	0.2824	-0.8863	0.01634	-1.76	1.916e-07	-1.17606	0.02117	-0.3318	0.9799	-1.156	0.00239	-0.6295	0.3947	-0.821689	0.03853	-0.3111	0.6721	-0.553177	0.3706
MVLG_06636	38.47	35.79	88.18	88.73	58.24	68.96	63.64	62.55	74.83	88.93	88.55	88.92	75.01	71.46	1.386	1.489e-07	0.8605	0.003495	0.7968	0.008542	1.023	0.003271	1.099	0.006563	-0.48951	0.2829	-0.5869	0.1153	-0.419192	0.2818	-0.32594	0.8055	-0.0765	1	0.1445	0.799	0.187	0.9009	0.231553	0.663	0.26	0.7514	-0.0677966	0.9349
MVLG_02112	303.93	221.3	693.62	847.88	1114.65	1056.94	1221.08	952.5	702.9	1090.75	814.72	781.97	1016.71	671.88	1.71	8.115e-11	2.15	4.062e-14	2.118	7.168e-13	1.708	7.763e-07	1.799	5.969e-06	0.473099	0.2847	0.4088	0.3014	-0.0639716	0.892	0.0508123	1	-0.04403	1	-0.4637	0.2625	-0.4045	0.6073	-0.407712	0.3581	-0.3624	0.5882	-0.0782098	0.9384
MVLG_04366	134.54	142.63	27.63	16.58	48.06	25.46	40.16	31.7	78.51	63.49	65	41.97	18.65	29.34	-2.518	6.537e-16	-1.846	1.117e-08	-1.889	2.128e-09	-1.143	0.0005002	-2.349	3.305e-07	0.702426	0.2847	0.6317	0.2287	1.32431	0.001524	0.120099	0.9635	-0.0536	1	0.6896	0.1392	-0.5526	0.7095	0.761523	0.08571	-0.4913	0.6721	1.20495	0.04197
MVLG_04709	232.52	282.91	16.87	15.53	28.39	24.58	35.56	38.93	166.77	106.28	158.79	91.18	52.79	29	-3.862	4.235e-36	-3.212	7.265e-24	-2.767	9.56e-19	-0.9966	0.002459	-2.325	1.537e-08	0.68133	0.2847	1.093	0.009027	2.81639	1.057e-12	1.48522	0.006524	0.4335	0.954	2.203	3.753e-08	0.8345	0.223	1.78053	5.114e-06	0.3996	0.5709	1.32362	0.007523
MVLG_05135	275.74	430.55	17.62	14.31	29.29	28.26	18.07	39.37	25.13	34.51	17.31	26.94	20.75	11.82	-4.339	5.691e-39	-3.545	9.298e-26	-3.686	7.55e-27	-3.881	5.957e-32	-4.208	9.795e-20	0.821962	0.2847	0.6464	0.2621	0.398033	0.5174	0.0824296	1	-0.1421	1	-0.3586	0.526	-0.7208	0.5749	-0.225914	0.6459	-0.6149	0.5514	0.339337	0.7734
MVLG_05532	164.81	170.01	100.05	119.57	228.37	129.66	274.24	212.14	645.41	1055.06	596.4	225.38	98.34	123.41	-0.4505	0.1996	0.1839	0.6373	0.639	0.05114	2.265	1.075e-10	-0.2137	0.8114	0.663829	0.2847	1.089	0.009404	2.65312	1.197e-11	0.187524	0.9432	0.4429	0.9491	2.06	2.377e-07	-0.4483	0.7929	1.63271	2.526e-05	-0.8836	0.2475	2.47788	1.628e-07
MVLG_05584	1657.3	2525.08	52.83	75.26	118.64	83.93	413.45	175.74	1644.38	989.18	2103.1	1616.86	711.69	131.61	-4.897	1.339e-57	-4.301	1.421e-41	-2.775	2.306e-20	-0.4958	0.1563	-1.465	0.0001515	0.625675	0.2847	2.119	4.7e-10	4.35013	3.075e-27	3.38825	8.003e-14	1.509	0.001298	3.795	5.802e-21	2.798	3.447e-09	2.30408	8.052e-10	1.297	0.006532	0.960882	0.04146
MVLG_05781	514.07	511.25	342.29	287.52	197.06	246.98	176.41	196.43	323.43	335.75	305.23	422.01	429.87	482.63	-0.5587	0.04469	-1.109	0.0001868	-1.41	3.045e-06	-0.7451	0.02698	-0.07658	0.8655	-0.512422	0.2847	-0.848	0.01741	-0.239947	0.5767	0.443263	0.6733	-0.3141	0.9799	0.3455	0.475	0.975	0.1098	0.669713	0.1248	1.283	0.01162	-0.653134	0.1963
MVLG_03616	45.09	54.1	101.91	78.37	153.83	128.5	93.81	106.16	41.02	44.85	46.91	29.31	43.78	95.89	1.01	0.002258	1.595	1.89e-06	1.059	0.001483	-0.1718	0.6539	0.5568	0.3689	0.617921	0.2856	0.0511	0.9505	-1.23703	0.002225	-0.496328	0.6792	-0.5447	0.8577	-1.785	6.138e-06	-1.094	0.1006	-1.23103	0.002306	-0.5561	0.4494	-0.718322	0.3143
MVLG_03577	69.56	57.97	188.9	187.58	115.65	155.3	82.19	105.71	71.16	111.23	85.46	86.98	126.41	125.7	1.7	1.075e-10	1.181	4.619e-05	0.5949	0.05343	0.3582	0.3462	0.9504	0.02486	-0.482058	0.2861	-1.103	0.0007735	-1.40207	2.689e-05	-0.78805	0.161	-0.5978	0.6074	-0.8448	0.02607	-0.2889	0.7534	-0.239517	0.6219	0.3009	0.7455	-0.575257	0.2949
MVLG_05783	29.83	48.81	78.73	40.27	123.62	63.9	130.92	99.08	46.24	119.32	105.04	102.16	128.91	88.19	0.7271	0.02786	1.308	7.205e-05	1.596	3.189e-07	1.142	0.00125	1.576	0.0002856	0.613154	0.2869	0.8726	0.03491	0.355887	0.4717	0.804941	0.3409	0.2768	1	-0.1865	0.7116	0.208	0.9262	-0.449781	0.3196	-0.0643	0.9684	-0.42079	0.5256
MVLG_03002	99.53	73.68	2.51	4.16	9.98	7.52	12.22	12.29	30.03	40.51	31.62	10.17	12.31	7.77	-4.549	1.721e-27	-3.223	3.905e-16	-2.783	3.812e-15	-1.443	8.223e-06	-2.947	1.395e-09	1.33028	0.2874	1.746	0.01712	3.04297	2.25e-08	1.52252	0.2807	0.4264	1	1.758	0.0007635	0.211	0.9994	1.33885	0.004331	-0.2164	0.8914	1.51436	0.01114
MVLG_03712	46	61.09	20.58	24.5	8.35	18.92	6.26	14.89	38.49	29.4	49.78	31.77	39.22	21.41	-1.12	0.0002321	-1.885	6.235e-08	-2.44	1.068e-11	-0.6015	0.08356	-0.7215	0.09887	-0.728036	0.2874	-1.322	0.006655	0.465426	0.3066	0.352657	0.8673	-0.5569	0.9727	1.267	0.005459	1.092	0.1679	1.81161	5.612e-05	1.609	0.01233	0.136084	0.8761
MVLG_03916	120.78	108.1	29.88	37.22	26.63	10.97	25.29	16.52	61.77	45.66	49.19	70.24	50.63	47.53	-1.624	6.523e-07	-2.533	6.023e-11	-2.341	1.472e-11	-1.228	0.0002151	-1.016	0.03386	-0.870221	0.2874	-0.7117	0.1927	0.342463	0.5215	0.559093	0.6469	0.1767	1	1.292	0.01358	1.451	0.07139	1.13731	0.01301	1.294	0.05517	-0.201448	0.7979
MVLG_03939	386.43	251.72	1020.73	1194.66	1668.14	1451.7	1357.19	1190.9	915.45	1045.6	971.33	621.97	1032	911.96	1.963	9.562e-14	2.399	4.459e-17	2.084	1.74e-12	1.64	2.044e-06	1.673	3.139e-05	0.469745	0.2885	0.123	0.822	-0.379783	0.3361	-0.326836	0.743	-0.3264	0.9727	-0.7773	0.04018	-0.7827	0.1587	-0.438032	0.3174	-0.4584	0.4415	-0.0151663	1
MVLG_05405	28.23	21.3	59.78	62	90.53	90.89	93.87	83.31	199.93	251.53	155.42	103.76	52.41	51.46	1.443	1.008e-06	1.962	2.391e-10	1.888	9.646e-10	2.919	5.446e-16	1.357	0.001502	0.553315	0.2885	0.4472	0.3203	1.41793	0.0001627	-0.130364	1	-0.08676	1	0.9355	0.0223	-0.6535	0.4981	1.03587	0.01002	-0.5645	0.5193	1.55621	0.001327
MVLG_05778	165.78	169.71	452.03	533.15	764.21	634.16	775.59	555.88	646.99	642.51	541.91	549.51	487.75	409.43	1.698	1.507e-10	2.143	8.092e-14	2.043	4.962e-12	1.799	2.029e-07	1.61	5.721e-05	0.476628	0.2885	0.3452	0.4129	0.0448085	0.9419	-0.128801	0.9732	-0.1118	1	-0.3609	0.4091	-0.5851	0.4016	-0.234228	0.6348	-0.4732	0.4746	0.200934	0.7854
MVLG_03305	32.92	27.24	554.1	724.64	1377.13	515.91	1283.7	998.97	344.1	879.78	550.94	222.67	431.95	413.37	4.575	9.622e-50	5.052	1.817e-51	5.353	4.444e-54	4.438	8.23e-30	3.997	3.115e-18	0.504323	0.2914	0.778	0.02885	-0.204131	0.6349	-0.61622	0.3438	0.2934	0.9799	-0.6386	0.1103	-1.113	0.02481	-0.916558	0.01524	-1.404	0.001423	0.462882	0.3469
MVLG_04249	32.92	27.24	554.1	724.64	1377.13	515.91	1283.7	998.97	344.1	879.78	550.94	222.67	431.95	413.37	4.575	9.622e-50	5.052	1.817e-51	5.353	4.444e-54	4.438	8.23e-30	3.997	3.115e-18	0.504323	0.2914	0.778	0.02885	-0.204131	0.6349	-0.61622	0.3438	0.2934	0.9799	-0.6386	0.1103	-1.113	0.02481	-0.916558	0.01524	-1.404	0.001423	0.462882	0.3469
MVLG_02701	284.07	287.95	42.25	58.58	100.9	64.32	89.2	85.6	220.65	147.69	197.73	216.32	132.77	94.81	-2.358	4.34e-14	-1.713	1.347e-07	-1.651	1.903e-07	-0.6598	0.05555	-1.002	0.02852	0.674262	0.2926	0.7055	0.1619	1.64613	5.259e-05	1.30523	0.02942	0.05174	1	1.041	0.01733	0.6575	0.4279	1.00361	0.01821	0.6075	0.3754	0.344247	0.694
MVLG_07162	126.96	163.63	165.29	141.28	262.02	248.08	497.61	237.6	156.25	472.79	304.45	265.17	189.41	177.11	0.2412	0.5636	0.9312	0.0115	1.513	2.783e-06	1.36	0.0001207	0.7882	0.1245	0.721074	0.2926	1.273	0.003666	1.05387	0.0176	0.49891	0.7677	0.5608	0.8611	0.4022	0.4724	-0.2036	0.9262	-0.138526	0.8195	-0.7458	0.3084	0.577639	0.3819
MVLG_01487	0.04	0.04	193.99	239.88	131.86	176.74	40.95	127.08	4.54	3.13	15.69	201.37	170.67	266.28	12.35	1e-94	11.81	9.866e-72	10.84	1.05e-59	7.413	8.264e-25	12.21	4.459e-41	-0.501274	0.2933	-1.512	8.335e-06	-5.04083	1.409e-43	-0.105687	0.9811	-0.9765	0.1452	-4.462	1.685e-32	0.4153	0.6691	-3.49405	1.136e-20	1.364	0.00966	-4.92047	5.699e-29
MVLG_01765	9.57	6.94	32.45	25.26	43.28	42.63	62.54	57.06	28.57	26.28	29.94	41.02	34.47	41.44	1.945	8.37e-11	2.464	5.563e-15	2.897	1.946e-20	1.632	3.429e-06	2.29	9.547e-08	0.554342	0.2939	0.9562	0.009237	-0.365997	0.4027	0.304142	0.8731	0.4211	0.9144	-0.8493	0.03491	-0.2289	0.8949	-1.25823	0.0006548	-0.6502	0.3266	-0.650516	0.2314
MVLG_05610	450.46	435.31	1107.33	869.77	1601.63	1233.65	1104.37	1195.55	1133.93	317.06	224.02	487.44	316.44	268.66	1.336	9.94e-07	1.796	7.153e-10	1.497	5.746e-07	0.4712	0.1942	-0.1231	0.8566	0.494797	0.2939	0.1652	0.7578	-0.899987	0.01529	-1.49932	0.002724	-0.3092	0.9799	-1.33	0.0002797	-1.973	4.742e-05	-0.999933	0.009438	-1.665	0.0007521	0.617729	0.2967
MVLG_06728	12.26	12.4	48.66	55.02	68.22	80.65	62.79	76.18	22.41	26.78	38.78	28.72	36.79	31.25	2.206	3.628e-15	2.677	5.381e-19	2.524	1.65e-16	1.113	0.001574	1.499	0.000579	0.505908	0.2942	0.3194	0.4753	-1.14948	0.001135	-0.747843	0.2727	-0.1642	1	-1.581	8.649e-06	-1.237	0.01818	-1.40916	8.54e-05	-1.079	0.03563	-0.373394	0.5979
MVLG_01873	116.51	110.11	69.92	64.9	62.98	19.12	35.69	36.05	76.42	68.44	85.42	53.33	120.95	81.92	-0.5974	0.07984	-1.397	0.0002499	-1.602	7.898e-06	-0.5915	0.09266	-0.04138	0.8395	-0.762572	0.2945	-0.9994	0.04572	-0.0479944	0.9325	0.513455	0.7932	-0.2119	1	0.7925	0.1284	1.288	0.1276	1.01648	0.03386	1.497	0.02232	-0.525896	0.4983
MVLG_02368	33.76	27.61	90.3	86.89	61.64	57.97	34.3	59.7	49.19	37.56	44.29	42.55	49.5	67.34	1.675	1.155e-08	1.051	0.002383	0.6128	0.06763	0.4027	0.2901	0.9914	0.03798	-0.588503	0.2945	-1.061	0.01038	-1.32487	0.0003093	-0.724152	0.3469	-0.4415	0.9762	-0.6635	0.1492	-0.1187	0.9505	-0.221498	0.6752	0.3012	0.8384	-0.572316	0.3962
MVLG_03283	506.4	510.2	18.27	2.73	3.63	5.86	3.33	3.84	62.94	35.59	50.67	44.47	23.64	26.77	-5.462	3.08e-57	-6.652	3.823e-57	-7.15	4.598e-64	-3.496	5.312e-27	-4.133	1.94e-21	-1.13405	0.2945	-1.661	0.03017	1.92175	1.803e-05	1.27403	0.1499	-0.4998	1	3.142	9.914e-09	2.424	0.002039	3.66276	1.66e-12	2.933	4.056e-05	0.64142	0.4056
MVLG_04230	8.35	16.7	1.85	1.21	5.68	1.98	23.82	3.86	45.25	67.05	38.13	18.49	4.08	1.94	-2.915	3.984e-11	-1.666	6.065e-05	0.2543	0.6253	1.832	1.377e-07	-1.485	0.03143	1.25842	0.2945	3.153	1.181e-09	4.68608	6.047e-22	1.34918	0.1713	1.889	0.004125	3.48	2.197e-14	0.1303	0.8852	1.62094	1.783e-05	-1.714	0.06147	3.30286	3.286e-08
MVLG_04251	3.54	2.14	15.39	9.14	4.06	8.68	7.02	5.15	34.61	43.28	32.68	14.86	10.2	6.71	2.254	9.699e-08	1.266	0.03511	1.191	0.01143	3.58	5.185e-21	1.788	0.002187	-0.942658	0.2945	-1.052	0.08409	1.26923	0.003713	-0.503287	0.8852	-0.09164	1	2.289	3.808e-06	0.4534	0.8236	2.39959	8.436e-08	0.5596	0.6573	1.79526	0.002508
MVLG_06173	104.41	109.62	312.04	238.4	311.46	464.44	213.58	352.65	122.07	81.3	90.08	108.54	178.22	285.76	1.508	3.631e-08	1.965	1.953e-11	1.449	1.476e-06	-0.2107	0.5896	1.115	0.01158	0.495709	0.2945	-0.05505	0.9614	-1.76689	2.271e-07	-0.431845	0.5978	-0.5268	0.7504	-2.19	3.457e-10	-0.9123	0.08686	-1.65519	3.714e-06	-0.3975	0.5156	-1.29671	0.005034
MVLG_03622	42.87	42.73	20.03	18.95	12.61	8.12	11.06	3.32	32.9	42.38	30.34	51.52	24.43	22.66	-0.9952	0.005985	-1.97	7.29e-06	-2.336	4.606e-10	-0.3735	0.3035	-0.5963	0.3677	-0.932341	0.296	-1.326	0.01579	0.562618	0.2847	0.348328	0.8594	-0.3817	0.9885	1.576	0.00422	1.305	0.1288	1.99316	1.101e-05	1.727	0.007309	0.218883	0.9233
MVLG_03825	51.6	62.83	90.37	97.71	146.29	133.72	182.19	161.75	60.15	85.08	74.15	118.11	60.44	97.87	0.8535	0.004503	1.37	1.009e-05	1.634	8.387e-08	0.283	0.4791	0.6667	0.1412	0.549229	0.2961	0.781	0.04611	-0.630018	0.1132	-0.233913	0.9467	0.2513	1	-1.107	0.004089	-0.7565	0.3623	-1.34685	0.000226	-1.006	0.1063	-0.384671	0.5279
MVLG_01988	27.44	19.02	267.23	258.26	215.13	174.75	209.16	178.55	134.37	164.34	136	247.41	299.87	301.13	3.642	3.079e-39	3.148	1.781e-26	3.102	3.525e-24	2.504	1.328e-12	3.683	1.191e-18	-0.459408	0.299	-0.537	0.1442	-1.19475	0.0003917	0.0043727	1	-0.05741	1	-0.6637	0.08862	0.4819	0.5467	-0.592791	0.1484	0.5382	0.4097	-1.16676	0.005421
MVLG_03824	10.66	15.69	33.34	38.55	56	52.51	53.22	47.27	53.15	53.53	45.63	8.4	41.05	31.27	1.575	4.669e-07	2.111	7.404e-11	1.963	5.935e-10	1.802	2.939e-07	1.412	0.003642	0.567842	0.3006	0.3877	0.4485	0.171214	0.7459	-0.205316	0.8462	-0.1607	1	-0.3259	0.5028	-0.7646	0.1982	-0.15114	0.7905	-0.6059	0.2807	0.422442	0.3729
MVLG_01666	0.28	0.04	28.34	22.01	13.95	14.82	0.96	3.31	0	0.39	2.08	0	4.5	11.32	7.38	4.687e-22	6.517	7.148e-11	NA	NA	2.459	0.001435	NA	NA	-0.821369	0.301	-3.913	2.646e-08	-4.98235	2.709e-21	-1.92726	0.006372	-3.057	0.008105	-4.078	1.294e-09	-1.084	0.3554	-0.95659	0.4747	NA	NA	-2.99859	0.008663
MVLG_01810	90.75	79.08	40.23	38.69	27.19	28.34	31.66	37.98	67.33	71.43	77.37	62.78	53.46	58.2	-0.9704	0.0004081	-1.532	3.344e-07	-1.258	3.567e-05	-0.3921	0.2731	-0.5125	0.2329	-0.525946	0.301	-0.2848	0.5667	0.523417	0.1995	0.417807	0.7114	0.2638	1	1.122	0.005306	0.965	0.1223	0.867684	0.03623	0.6958	0.2688	0.129059	0.8838
MVLG_02514	7072.07	7232.22	419.72	806.98	314.58	453.62	89.5	251.22	8224.95	1276.77	3410.05	8532.63	1738.92	275.56	-3.417	1.313e-32	-4.058	7.596e-36	-5.417	8.118e-50	-0.4551	0.1996	-1.247	0.003235	-0.60724	0.301	-2.004	2.482e-06	2.92333	9.516e-15	2.12518	2.112e-06	-1.357	0.08768	3.598	1.344e-18	2.778	1.331e-08	4.94863	3.165e-28	4.089	5.349e-15	0.768797	0.1694
MVLG_04288	39.03	44.17	14.38	41.89	72.1	34.42	111.29	52.4	158.98	188.38	133.61	25.81	17.03	18.36	-0.4248	0.3223	0.4269	0.3268	1.093	0.001393	1.911	5.634e-08	-1.019	0.1364	0.87536	0.301	1.513	0.001565	2.27364	1.553e-07	-0.636684	0.8312	0.648	0.8254	1.466	0.0009857	-1.487	0.1386	0.843389	0.04549	-2.118	0.002974	2.93744	3.27e-07
MVLG_00890	37.72	29	48.56	42.99	85.63	61.49	111.31	82.36	46.56	61.04	49.3	36.37	41.08	22.31	0.607	0.08798	1.226	0.0004189	1.609	4.124e-07	0.5965	0.1104	0.1378	0.867	0.650339	0.3023	1.004	0.01669	-0.0688654	0.8969	-0.508488	0.728	0.3704	0.9763	-0.6494	0.1537	-1.143	0.1147	-1.0043	0.01148	-1.509	0.009173	0.470525	0.5405
MVLG_05871	37.72	29	48.56	42.99	85.63	61.49	111.31	82.36	46.56	61.04	49.3	36.37	41.08	22.31	0.607	0.08798	1.226	0.0004189	1.609	4.124e-07	0.5965	0.1104	0.1378	0.867	0.650339	0.3023	1.004	0.01669	-0.0688654	0.8969	-0.508488	0.728	0.3704	0.9763	-0.6494	0.1537	-1.143	0.1147	-1.0043	0.01148	-1.509	0.009173	0.470525	0.5405
MVLG_00839	37.21	29.73	18.59	18.29	9.95	14.09	8.8	15.08	31.31	11.03	15.11	24.74	16.96	17.29	-0.7218	0.01752	-1.387	4.72e-05	-1.508	8.024e-06	-1.017	0.002746	-0.8172	0.08953	-0.628254	0.3034	-0.7852	0.1069	-0.338878	0.4822	-0.139283	1	-0.1265	1	0.36	0.5028	0.5109	0.628	0.48919	0.3539	0.617	0.4591	-0.185477	0.8083
MVLG_01235	314.99	290.37	560.7	787.22	1012.73	894.19	1035.6	816.38	1093.33	910.37	892.58	637	813.23	795.61	1.316	1.44e-06	1.768	1.252e-09	1.716	9.008e-09	1.763	3.538e-07	1.607	8.699e-05	0.483922	0.3035	0.3995	0.3477	0.392634	0.3522	0.250102	0.9105	-0.06483	1	-0.02019	0.9733	-0.2198	0.8301	0.0597458	0.9284	-0.1553	0.8382	0.177717	0.7775
MVLG_00932	69.69	79.78	23.81	20.78	44.8	29.28	41.62	43.78	89.16	53.36	76.68	36.3	63.15	36.64	-1.61	1.003e-06	-0.9442	0.006692	-0.7761	0.02031	-0.1666	0.6742	-0.5049	0.2383	0.695383	0.306	0.8326	0.08555	1.39433	0.000946	1.05805	0.202	0.1586	1	0.767	0.1021	0.3758	0.8568	0.620275	0.1887	0.2126	0.9085	0.363852	0.5374
MVLG_02810	15.12	12.16	38.94	34.86	62.32	53.81	55.09	55.6	62.44	54.38	66.93	36.54	33.49	32.25	1.58	2.559e-06	2.174	1.959e-10	2.064	2.425e-10	2.06	6.803e-09	1.402	0.003921	0.626728	0.306	0.4864	0.3481	0.426766	0.3646	-0.219766	0.9541	-0.1198	1	-0.1299	0.8216	-0.8267	0.3283	0.0015604	1	-0.7095	0.3673	0.666318	0.2947
MVLG_05641	37.99	29.9	16.55	20.43	10.91	11.92	18.64	14.05	60.2	69.09	53.63	12.45	15.84	7.27	-0.7345	0.02333	-1.487	6.184e-05	-0.9922	0.00267	0.7086	0.04778	-1.404	0.002458	-0.715366	0.306	-0.2551	0.6825	1.38494	0.0005211	-0.709063	0.5173	0.4777	0.9762	2.175	5.59e-07	0.01871	1	1.7133	2.12e-05	-0.4512	0.6448	2.12969	1.14e-05
MVLG_06623	120.25	80.71	25.37	27.54	40.6	35.61	52.17	41.47	41.25	37.78	44.56	22.16	35.22	31.22	-1.783	4.141e-11	-1.318	5.667e-06	-1.064	0.0003505	-1.445	6.735e-06	-1.634	8.851e-06	0.498569	0.306	0.722	0.04986	0.28436	0.5286	0.111439	1	0.2429	1	-0.1426	0.7844	-0.3731	0.6546	-0.371764	0.4197	-0.6166	0.282	0.206712	0.7401
MVLG_02703	343.32	303.22	119.16	106.7	152.26	163.73	220.89	203.08	123.87	179.76	158.77	115.77	121.43	163.16	-1.381	1.661e-07	-0.9487	0.0009808	-0.5728	0.05935	-1.206	0.0001913	-1.188	0.00135	0.468848	0.3067	0.8119	0.01675	0.117427	0.8164	0.155537	0.9665	0.3633	0.9491	-0.2775	0.5418	-0.294	0.7558	-0.630211	0.1196	-0.6601	0.2382	-0.0046046	1
MVLG_00330	233.56	227.15	509.52	493.02	405.54	334.13	325.93	325.95	141.59	281.96	221.05	277.65	426.37	507.17	1.264	1.573e-06	0.7641	0.009512	0.5503	0.07441	-0.1655	0.6567	0.9837	0.01814	-0.466351	0.3105	-0.7113	0.04467	-1.4916	6.863e-06	-0.319673	0.7541	-0.2241	1	-0.9519	0.01042	0.1609	0.9489	-0.716837	0.06982	0.3827	0.6373	-1.13141	0.009407
MVLG_04453	2.37	3.66	71.99	9.81	25.15	5.85	0	0	0	1.07	5.15	0	27.58	31.27	3.938	6.96e-08	2.416	0.06383	-6.192	0.1734	-0.2145	0.6275	3.503	0.0003522	-1.4483	0.3105	NA	NA	-4.1873	3.067e-08	-0.462768	0.7677	NA	NA	NA	NA	NA	NA	NA	NA	NA	NA	-3.66572	0.0008276
MVLG_06926	21.36	14.49	24.23	19.92	9.87	6.26	4.41	5.17	4.07	6.41	3.9	0	1.98	7.14	0.4655	0.3939	-1.052	0.2128	-1.873	0.006152	-1.773	3.303e-06	-2.038	0.01821	-1.4468	0.3105	-2.283	0.0143	-2.3003	0.0002099	NA	NA	NA	NA	-0.7469	0.5398	NA	NA	0.0882337	1	NA	NA	0.251636	0.9349
MVLG_01488	52.94	70.08	46.24	60.72	32.1	37.85	10.05	27.15	33.72	22.25	24.21	47.58	60.44	61.59	-0.07	0.8561	-0.7341	0.04127	-1.84	8.937e-07	-1.354	4.98e-05	0.04432	0.9985	-0.62967	0.3107	-1.773	8.186e-05	-1.33751	0.0004926	0.0686638	1	-1.102	0.37	-0.6342	0.2057	0.7125	0.4499	0.455962	0.4984	1.767	0.004727	-1.37194	0.004938
MVLG_01832	38.88	28.09	24.76	23.74	14.6	12.94	7.53	12.51	22.27	13.19	11.8	33.48	22.14	25.45	-0.3189	0.3965	-1.195	0.004431	-1.796	8.75e-06	-1.26	0.0002777	-0.3346	0.628	-0.836037	0.3107	-1.47	0.007766	-0.99353	0.03238	-0.0602871	1	-0.6024	0.9863	-0.07999	0.9599	0.7966	0.452	0.526262	0.4399	1.377	0.08164	-0.90717	0.1372
MVLG_00168	65.11	52.19	13.61	15.88	25.37	19.44	52.87	32.01	48.79	90.23	69.27	30.32	35.97	31.32	-1.853	2.244e-10	-1.314	2.369e-05	-0.4229	0.1758	0.1069	0.8093	-0.7599	0.06381	0.570011	0.3109	1.43	6.28e-05	1.8971	6.216e-07	1.04983	0.1167	0.8772	0.2393	1.399	0.000475	0.4969	0.6136	0.536795	0.2294	-0.3743	0.6121	0.879459	0.06451
MVLG_04226	75.4	59.03	165.34	198.69	289.04	234.93	357.97	329.61	258.48	290.03	316.9	390.33	238.9	292.75	1.588	1.423e-08	2.051	6.635e-12	2.415	1.584e-15	2.043	4.841e-09	2.237	4.525e-08	0.495626	0.3109	0.8276	0.02032	0.398187	0.3556	0.607498	0.444	0.3524	0.9697	-0.02543	0.9649	0.136	0.9358	-0.365286	0.427	-0.2165	0.8323	-0.190615	0.7807
MVLG_02815	199.22	190.05	69.35	49.48	49.73	30.05	42.73	44.27	64.51	71.9	68.41	57.06	62.99	44.77	-1.573	3.346e-08	-2.216	5.215e-12	-2.125	1.849e-11	-1.619	4.369e-07	-1.728	1.959e-05	-0.606937	0.3121	-0.5472	0.2396	-0.0999105	0.8409	-0.195211	0.9538	0.08245	1	0.5802	0.2319	0.4296	0.735	0.508651	0.3078	0.3442	0.726	0.121746	0.8988
MVLG_04112	106.98	81.52	613.37	664.68	417.83	524.4	253.65	333.52	152.7	119.57	160.43	445.21	405.34	438.12	2.906	1.705e-27	2.421	2.647e-17	1.688	1.099e-08	0.4975	0.1756	2.264	1.281e-08	-0.449461	0.3133	-1.216	0.0001021	-2.46152	2.766e-14	-0.679877	0.282	-0.7441	0.308	-1.938	1.142e-08	-0.2079	0.8675	-1.18363	0.001093	0.5295	0.4208	-1.75618	1.078e-05
MVLG_04283	86.94	110	26.07	22.91	42.37	35.32	65.92	54.63	40.03	63.98	55.61	54.14	40.72	27.71	-1.877	7.51e-10	-1.272	8.063e-05	-0.6694	0.03371	-1.001	0.002314	-1.326	0.002907	0.637012	0.3136	1.208	0.002473	0.81699	0.06187	0.503526	0.6971	0.589	0.7504	0.2505	0.6626	-0.1108	1	-0.326204	0.5002	-0.6961	0.365	0.328174	0.7192
MVLG_03358	354.98	389.77	120.92	156.93	181.18	210.12	233.77	244.53	254.57	536.3	372.42	245.01	245.18	359.86	-1.286	1.74e-06	-0.8423	0.004213	-0.6	0.05026	-0.0458	0.9006	-0.2863	0.497	0.477395	0.3152	0.6857	0.06072	1.17556	0.001392	0.958045	0.09911	0.2296	1	0.7732	0.05782	0.4992	0.5437	0.552631	0.2118	0.2658	0.7692	0.256258	0.6852
MVLG_02365	1503.89	1570.15	31.02	19.6	48.57	46.2	15.2	33.09	759.99	232.42	315.16	847.38	127.19	52.82	-5.768	9.967e-62	-4.924	1.339e-44	-6.088	1.147e-55	-1.877	4.157e-09	-2.78	1.059e-09	0.870209	0.3159	-0.3188	0.86	3.85146	1.91e-18	2.91314	9.101e-08	-1.158	0.5184	3.039	2.186e-12	2.116	0.0001181	4.20201	1.081e-19	3.25	1.091e-08	0.836544	0.3031
MVLG_04367	9.44	13.79	22.89	9.27	10.11	7.61	3.87	3.56	6	2.05	2.13	0	5.86	7.86	0.5949	0.1571	-0.3235	0.6027	-1.606	0.001182	-2.198	4.517e-08	-0.7897	0.09186	-0.874885	0.3159	-2.175	0.0003255	-2.8414	1.186e-07	-1.41175	0.08477	-1.276	0.5685	-1.881	0.01498	-0.5197	0.6865	-0.572597	0.7167	0.7519	0.8176	-1.33897	0.4261
MVLG_05704	7.53	5.29	89.63	69.35	67.98	21.16	27.79	48.62	19.5	23.96	25.5	0	132.83	108.85	3.805	6.09e-15	2.88	3.645e-05	2.551	2.308e-06	1.998	1.075e-06	4.428	1.115e-14	-0.881983	0.3159	-1.245	0.05283	-1.867	5.915e-05	0.582136	0.9177	-0.3295	1	-0.903	0.1968	1.472	0.2006	-0.575913	0.3261	1.778	0.03752	-2.41304	1.336e-05
MVLG_06150	139.15	127.52	129.04	110.38	98.04	73.91	96.91	71.29	395.08	568.78	363.81	177.72	176.18	128.9	-0.01634	0.9696	-0.5577	0.07983	-0.6138	0.04899	1.619	2.709e-06	0.3277	0.4905	-0.506706	0.3188	-0.5932	0.1307	1.57721	1.334e-05	0.304536	0.8452	-0.06844	1	2.156	1.801e-08	0.8314	0.212	2.24058	4.133e-09	0.9038	0.1188	1.30266	0.002385
MVLG_06071	11.14	11	40.81	46.64	54.08	76.82	72.85	77.41	66.43	81.33	85.15	73.87	59.25	61.67	2.119	2.19e-11	2.656	9.62e-16	2.798	2.274e-18	2.7	7.738e-14	2.588	3.668e-09	0.570925	0.3215	0.6792	0.1125	0.523257	0.2373	0.423607	0.7579	0.1289	1	0.0245	0.9948	-0.1259	0.9669	-0.0958108	0.8625	-0.2581	0.8083	0.118464	0.919
MVLG_02096	80.51	59.57	24.26	15.29	33.34	27.76	41.21	30.74	110.67	110.64	92.78	68.34	31.15	26.59	-1.685	1.988e-08	-1.117	0.0004986	-0.9085	0.0035	0.4397	0.2361	-0.9431	0.05702	0.602557	0.3219	0.7811	0.07056	2.07265	7.194e-08	0.695681	0.3814	0.1949	1	1.539	0.0001278	0.1266	0.9219	1.36072	0.000538	-0.05986	1	1.37115	0.007838
MVLG_03411	0.64	0.63	108.53	98.64	82.83	67.62	67.98	71.78	25.15	50.07	42.19	28.3	99.3	72.2	7.477	1.628e-87	6.954	1.292e-65	6.808	3.822e-66	5.833	4.657e-40	6.958	1.199e-33	-0.488453	0.3241	-0.666	0.07844	-1.70779	3.559e-07	-0.552992	0.3814	-0.1559	1	-1.146	0.002264	-0.05677	0.9422	-0.980585	0.009987	0.09414	1	-1.10704	0.02065
MVLG_05471	14.39	11.83	30.73	23.63	33.78	47.36	32.19	36.89	48.81	62.54	56.75	27.44	38.75	34.59	1.19	0.0001592	1.723	1.237e-07	1.426	8.144e-06	1.97	2.158e-08	1.521	0.0006832	0.569294	0.3257	0.2391	0.674	0.723429	0.08655	0.290156	0.9232	-0.3088	0.9908	0.2252	0.6915	-0.264	0.8236	0.541534	0.2578	0.03719	1	0.464398	0.4254
MVLG_03819	303.79	317.54	55.74	60.25	65.16	109.24	95.88	152.9	49.66	56.3	78.15	103.1	36.64	112.24	-2.28	1.015e-14	-1.73	2.615e-08	-1.292	3.274e-05	-2.406	4.117e-14	-1.899	7.909e-06	0.583929	0.3264	0.9865	0.01208	-0.182911	0.7106	0.331893	0.8312	0.427	0.9298	-0.6949	0.107	-0.2238	0.9446	-1.11998	0.003324	-0.6602	0.3831	-0.513612	0.3757
MVLG_06598	5.12	7.19	78.73	106.99	66.04	60.35	11	30.77	5.54	2.02	4.61	46.81	60.57	58.11	4.046	9.8e-36	3.433	6.919e-20	1.631	7.646e-05	-0.8794	0.06056	3.351	4.692e-12	-0.579769	0.327	-2.416	1.078e-08	-4.97877	9.334e-33	-0.738082	0.3457	-1.794	0.005689	-4.318	5.025e-21	-0.1431	0.937	-2.53716	1.13e-06	1.6	0.02232	-4.17493	5.097e-16
MVLG_00982	94.33	100.57	306.33	341	202.17	274.82	143.91	230.79	57.23	71.13	100.39	168.71	195.54	219.51	1.866	1.022e-12	1.381	1.239e-06	0.9791	0.001006	-0.48	0.1705	1.09	0.007475	-0.448209	0.3271	-0.8852	0.008074	-2.4031	1.167e-13	-0.815717	0.1364	-0.4134	0.8954	-1.878	3.654e-08	-0.3477	0.6868	-1.45859	3.413e-05	0.05729	0.9986	-1.55756	0.0001541
MVLG_01023	38.91	71.3	18.73	17.36	27.03	29.23	42.18	42.23	42.34	45.38	63.65	49.41	27.06	44.67	-1.491	1.847e-06	-0.9032	0.007114	-0.365	0.282	-0.2723	0.457	-0.4922	0.3391	0.619379	0.3271	1.124	0.006303	1.16397	0.005085	0.946451	0.2092	0.5244	0.8577	0.6152	0.1987	0.3526	0.7634	0.100038	0.8896	-0.1714	0.917	0.222315	0.8324
MVLG_03364	12.26	13.35	46.58	50.34	91.97	53.43	100.99	54.83	272.98	149.68	233.04	218.18	149.91	84.68	2.055	2.126e-11	2.568	1.726e-15	2.661	4.237e-17	3.951	1.59e-25	3.501	4.715e-16	0.543045	0.3271	0.6073	0.1649	1.84795	7.956e-07	1.40106	0.005647	0.07961	1	1.374	0.0004923	0.8855	0.1652	1.31652	0.0006668	0.8172	0.1501	0.451101	0.4921
MVLG_04038	3.05	3.82	24.07	24.26	60.4	25.15	24.68	20.66	43.64	45.14	26.34	0	29.23	34.18	2.948	2.036e-09	3.694	1.52e-15	2.785	1.093e-10	3.39	3.795e-18	3.21	2.107e-07	0.773231	0.3271	-0.1609	0.8616	0.383625	0.5085	0.217276	1	-0.9156	0.5133	-0.3218	0.6057	-0.5397	0.4375	0.614982	0.2605	0.378	0.9883	0.202735	0.5196
MVLG_04971	23.31	18.04	2.36	2.32	6.73	3.52	7.18	6.57	9.54	8.58	3.63	4.72	2.07	2.46	-3.001	5.179e-13	-1.941	1.69e-06	-1.547	1.254e-05	-1.694	4.034e-07	-3.04	7.985e-07	1.07722	0.3271	1.444	0.02967	1.2483	0.03337	NA	NA	0.3809	1	0.2277	0.7704	-1.133	0.5777	-0.140411	0.8525	-1.519	0.1476	1.35681	0.1507
MVLG_02013	0.8	0.85	173.76	197.1	103.2	162.55	61.28	92.74	38.94	24.53	26.39	187.16	158.71	150.79	7.933	3.086e-90	7.412	4.852e-68	6.548	5.776e-59	5.019	1.109e-30	7.677	1.943e-37	-0.483739	0.3287	-1.384	4.547e-05	-2.96833	2.995e-18	-0.29279	0.8546	-0.8742	0.2374	-2.41	2.339e-11	0.2134	0.8826	-1.53035	5.021e-05	1.074	0.05714	-2.64756	1.385e-10
MVLG_04097	44.88	43.11	92.63	89.9	60.85	72.8	57.47	55.23	36.58	34.11	37.67	86.95	81.65	75.16	1.186	7.838e-06	0.687	0.02154	0.3887	0.2237	-0.4451	0.2111	0.92	0.02546	-0.462301	0.3287	-0.7943	0.0223	-1.6844	3.777e-07	-0.304702	0.8294	-0.3113	0.9789	-1.148	0.001741	0.1797	0.9076	-0.825901	0.03435	0.4876	0.4817	-1.35472	0.001357
MVLG_02375	15.53	13.74	13.77	16.89	44.19	7.56	53.56	30.89	29.22	38.05	31.53	23.78	17.7	24.47	0.2065	0.6028	0.8677	0.02373	1.593	5.681e-07	1.052	0.003048	0.6183	0.2373	0.687647	0.3293	1.386	0.0008416	0.785638	0.08968	0.363341	0.8753	0.7151	0.593	0.1691	0.7625	-0.2982	0.8856	-0.52589	0.25	-1	0.1482	0.436902	0.5759
MVLG_02668	21.95	25.73	70.21	68.15	133.07	70.57	178.65	91.99	84.89	127.54	92.13	48.39	43.53	38.27	1.669	6.972e-09	2.151	2.02e-12	2.548	9.912e-17	1.974	1.814e-08	0.907	0.05168	0.512327	0.3293	0.88	0.01711	0.244758	0.6105	-0.805395	0.3048	0.3842	0.9491	-0.1973	0.6936	-1.298	0.02648	-0.563293	0.186	-1.675	0.0007812	1.07689	0.03372
MVLG_02865	2.16	1.97	69.06	90.24	133.14	102.95	142.78	115.6	60.89	91.99	75.36	45.42	51.54	43.32	5.404	4.051e-51	5.908	2.959e-55	6.013	3.215e-56	5.125	3.547e-34	4.64	1.299e-18	0.534794	0.3293	0.6088	0.1522	-0.343016	0.4293	-0.804709	0.3035	0.09311	1	-0.8059	0.04672	-1.323	0.02507	-0.885439	0.02413	-1.414	0.007562	0.492471	0.4539
MVLG_04615	565.86	437.69	906.8	1144.36	1334.09	1474.59	1581.4	1410.86	855.55	661.64	592.9	1286.86	600.11	456.17	1.186	5.849e-06	1.591	1.515e-08	1.642	1.979e-08	0.4373	0.237	0.6172	0.129	0.439745	0.3293	0.4571	0.2285	-0.801388	0.02427	-0.605627	0.4489	0.03836	1	-1.169	0.0009857	-1.014	0.06729	-1.19405	0.0008533	-1.055	0.03734	-0.18181	0.7734
MVLG_00393	0.93	0.45	14.36	10.23	4.55	8.83	2.88	4.81	3.34	3.65	2.85	13.85	19.06	13.43	4.298	1.111e-19	3.376	8.356e-07	2.4	5.429e-05	2.143	4.243e-07	4.65	1.115e-14	-0.879182	0.3301	-1.882	0.001281	-2.21722	1.257e-06	0.311168	0.9232	-0.9739	0.8734	-1.261	0.05137	1.2	0.2549	-0.279041	0.6707	2.154	0.004505	-2.4983	1.455e-06
MVLG_04826	79.41	71.43	32.43	44.44	20.24	30.08	7.53	8.92	43.73	30.12	25.79	27.44	29.46	14.66	-0.8353	0.004131	-1.439	8.747e-06	-3.203	1.439e-19	-1.33	4.84e-05	-1.641	0.0001161	-0.568622	0.3308	-2.363	2.899e-09	-0.547826	0.1885	-0.847907	0.269	-1.771	0.00278	0.09267	0.8977	-0.2639	0.8809	1.87885	2.337e-05	1.497	0.02285	0.330244	0.666
MVLG_02994	42.57	38.51	72.04	101.67	157.63	119.26	108.76	89.63	79.95	100.81	84.97	0	83.67	83.82	1.255	0.0004404	1.868	1.572e-07	1.387	5.909e-05	1.169	0.001117	1.154	0.08847	0.643063	0.3325	0.1329	0.9072	-0.146557	0.7712	-0.143155	0.8312	-0.4925	0.9075	-0.7191	0.1112	-0.7754	0.1791	-0.210067	0.7146	-0.2805	0.5388	0.0378879	0.7126
MVLG_06793	0.38	0.18	34.57	49.92	26.49	23.29	21.74	24.38	3.55	1.46	4.22	122.65	102.41	67.03	7.305	1.989e-23	6.484	8.279e-12	6.317	3.761e-18	3.2	2.975e-07	8.383	8.591e-23	-0.78257	0.3328	-0.986	0.08747	-4.17344	1.657e-16	1.04632	0.1597	-0.1781	1	-3.306	3.494e-07	1.847	0.004174	-3.12124	6.913e-09	2.022	0.0005532	-5.17127	1.116e-22
MVLG_06454	49.61	50.49	191.66	158.92	129.81	124.2	114.14	110.92	110.75	115.59	112.27	238.42	195.23	222.75	1.946	9.58e-13	1.425	2.467e-06	1.211	7.919e-05	1.062	0.002378	2.192	7.151e-08	-0.484604	0.3338	-0.7313	0.0486	-0.937324	0.00877	0.20667	0.9177	-0.2262	1	-0.3804	0.3993	0.7127	0.3234	-0.141964	0.7971	0.9369	0.09587	-1.11929	0.01062
MVLG_00859	1.42	1.92	2269.64	2644.79	1828.01	1882.13	1558.26	1814.46	203.68	408.7	510.64	1902.32	2192.12	1694.19	10.65	1.515e-168	10.19	6.813e-138	10.01	4.241e-125	7.687	6.853e-63	10.22	1.122e-70	-0.425568	0.3339	-0.6366	0.06466	-3.02475	6.983e-21	-0.466659	0.5512	-0.1896	1	-2.523	3.063e-14	-0.01965	1	-2.32432	4.774e-12	0.1659	0.8609	-2.52639	3.71e-11
MVLG_05017	382.01	388.49	97.32	54.96	60.13	48.75	46.39	45.04	44.52	52.47	80.82	52.73	60.34	63.1	-2.207	4.085e-16	-2.75	9.919e-20	-3.04	1.492e-22	-2.823	6.808e-19	-2.599	5.324e-12	-0.505289	0.3351	-0.826	0.02911	-0.667102	0.07901	-0.429856	0.6898	-0.3004	0.988	-0.08855	0.8709	0.09308	0.9957	0.222615	0.7001	0.3918	0.6574	-0.212517	0.8013
MVLG_04483	95.7	73.04	153.13	191.77	228.58	248.1	300.56	251.82	247.48	207.26	179.5	248.72	130.54	129.07	1.175	1.031e-05	1.589	2.488e-08	1.753	2.609e-09	1.187	0.0006015	0.9592	0.01728	0.447479	0.3356	0.5786	0.1173	-0.0419871	0.9302	-0.255977	0.9033	0.1517	1	-0.4175	0.3285	-0.6732	0.3623	-0.555733	0.1826	-0.8263	0.1538	0.226801	0.7936
MVLG_05027	9.61	9.55	34.37	28.99	23.53	18.75	23.23	16.65	28.94	44.46	25.64	30.75	28.83	17.82	1.86	4.108e-09	1.216	0.001644	1.121	0.001434	1.666	2.424e-06	1.442	0.002286	-0.60783	0.3356	-0.7335	0.1035	-0.253139	0.5814	-0.459586	0.755	-0.109	1	0.428	0.4467	0.1667	0.9505	0.555614	0.2549	0.2856	0.7752	0.233661	0.8105
MVLG_06112	12.8	8.25	22.45	25.67	50.11	22.06	57.08	27.2	39.09	61.8	51.45	28.86	39.79	38.31	1.337	1.049e-05	1.841	6.047e-09	2.061	2.925e-11	2.144	1.157e-09	1.904	9.697e-06	0.533215	0.3356	0.7259	0.08175	0.745158	0.06969	0.526472	0.6733	0.2077	1	0.283	0.5859	0.008046	1	0.0960081	0.8707	-0.188	0.8305	0.253241	0.6914
MVLG_00531	417.34	262.68	744.79	821.32	1335.76	866.89	931.51	925.03	1666.27	756.37	637.84	617.49	545.68	459.65	1.375	2.398e-07	1.796	3.272e-10	1.541	1.835e-07	1.598	3.646e-06	0.8354	0.04934	0.45252	0.3357	0.1692	0.7403	0.177967	0.7014	-0.577568	0.4495	-0.2628	0.9892	-0.209	0.6657	-1.012	0.0636	0.0731572	0.9091	-0.7499	0.1861	0.776906	0.1042
MVLG_01688	755.94	601.18	339.74	298.81	224.33	245.89	122.78	153.49	268.32	313.59	227.74	430.01	280.2	471.04	-0.9427	0.0003956	-1.435	5.988e-07	-2.253	8.73e-14	-1.431	8.169e-06	-0.7112	0.07442	-0.455559	0.3375	-1.306	5.71e-05	-0.543389	0.1504	0.19425	0.9277	-0.8278	0.2348	-0.01511	0.9788	0.6727	0.3367	0.82249	0.04849	1.493	0.001991	-0.709133	0.1376
MVLG_00953	92.17	82.16	634.94	595.38	431.49	483.07	261.83	377.29	121	84	126.11	247.38	317.33	359.37	2.963	7.588e-28	2.485	1.052e-17	1.922	1.081e-10	0.2372	0.5467	1.969	1.095e-06	-0.440956	0.3387	-1.037	0.001453	-2.77568	2.222e-17	-1.03151	0.02751	-0.5728	0.6394	-2.261	3.342e-11	-0.573	0.3936	-1.67848	1.597e-06	-0.007351	0.9986	-1.71417	3.106e-05
MVLG_03254	21.06	17.94	4.45	12.39	17.69	15.97	36.1	22.4	45.21	57.23	40.05	10.82	25.34	10.98	-1.067	0.01404	-0.1293	0.8295	0.6691	0.06318	1.179	0.0008412	0.02332	0.9589	0.960019	0.3411	1.729	0.0007504	2.1836	3.184e-06	1.03481	0.5119	0.779	0.6986	1.287	0.007924	0.08617	1	0.527033	0.277	-0.6792	0.389	1.17854	0.0221
MVLG_04531	96.36	103.51	34.53	22.18	21.03	10.09	32.17	44.79	38.65	22.13	22.1	19.45	25.14	37.96	-1.674	1.105e-06	-2.61	3.103e-10	-1.373	9.575e-05	-1.989	2.8e-09	-1.593	0.0006677	-0.893469	0.3411	0.3002	0.6746	-0.36498	0.5451	0.0349471	1	1.224	0.2742	0.6096	0.3494	0.9464	0.514	-0.616786	0.2311	-0.2875	0.7803	-0.369661	0.7379
MVLG_00526	73.47	60.74	136.51	155.84	222.05	190.24	252.72	235.9	185.7	235.54	240.88	265.76	178.97	133.34	1.267	3.506e-06	1.701	5.318e-09	1.91	1.43e-10	1.614	3.089e-06	1.501	0.0001915	0.467677	0.3424	0.6451	0.0813	0.288793	0.5187	0.193765	0.9121	0.198	1	-0.1063	0.8401	-0.2475	0.8739	-0.292293	0.538	-0.4461	0.555	0.111845	0.9273
MVLG_00769	5.8	3.85	20.28	15.96	38.06	21.67	87.08	54.05	51.99	87.4	64.93	10.26	21.91	13.06	2.053	4.804e-07	2.704	1.542e-11	3.934	2.829e-31	3.727	1.467e-22	1.959	0.0004145	0.681225	0.3424	1.881	1.555e-06	1.61262	0.0001213	-0.133724	0.9665	1.215	0.04825	1.001	0.02801	-0.8008	0.3658	-0.198848	0.7098	-2.01	9.946e-05	1.78331	0.0002622
MVLG_04307	3.22	3.5	30.78	32.62	56.92	35.06	74.41	41.28	37.33	46.02	47.3	36.47	44.67	39.3	3.368	6.489e-29	3.834	1.737e-32	4.14	1.852e-36	3.545	2.541e-21	3.668	1.207e-16	0.495976	0.3432	0.7725	0.04009	0.118956	0.8233	0.257557	0.9091	0.2936	0.9804	-0.306	0.5133	-0.2224	0.8584	-0.582537	0.1681	-0.51	0.4373	-0.108302	0.9173
MVLG_05193	6008.87	6503.07	77.16	9.54	40.09	95.19	39.46	54.93	229.23	132.8	232.42	761.14	95.56	66.64	-7.027	3.073e-98	-6.42	4.126e-76	-7.041	3.465e-80	-5.066	2.532e-50	-4.86	1.547e-31	0.647009	0.3449	-0.00702	0.9992	1.92033	1.107e-06	2.11155	1.242e-05	-0.6321	0.8295	1.338	0.001463	1.537	0.003696	1.9743	1.659e-06	2.162	1.796e-05	-0.274568	0.5132
MVLG_02403	139.12	199.05	307.38	295.02	227.39	210.15	109.73	205.33	81.91	66.64	97.25	94.92	132.86	161.9	0.97	0.0004297	0.4525	0.1592	-0.08305	0.8694	-1.105	0.0008446	-0.1267	0.7433	-0.483215	0.3451	-1.053	0.003763	-2.1275	3.047e-10	-1.1387	0.02341	-0.541	0.8072	-1.571	2.213e-05	-0.6409	0.3623	-1.02719	0.008504	-0.1168	0.873	-0.956531	0.06846
MVLG_01616	94.38	121.96	288.18	231.92	154.49	199.42	139.5	208.02	211.47	190.14	177.55	304.32	231.35	206.64	1.425	1.935e-06	0.825	0.02095	0.7306	0.02817	0.9051	0.01111	1.349	0.002312	-0.562686	0.3452	-0.6926	0.1301	-0.572161	0.1657	-0.119354	0.9937	-0.1037	1	0.06237	0.9393	0.462	0.6587	0.170082	0.8104	0.5521	0.5159	-0.430126	0.5119
MVLG_04560	56.33	50.88	170.67	199.6	146.16	115.36	103.28	132.76	49.52	49.84	75.34	52.33	139.66	123.95	1.939	2.073e-11	1.376	3.556e-05	1.184	0.0002364	0.104	0.8299	1.364	0.003334	-0.529547	0.3455	-0.7548	0.0696	-1.89151	7.432e-08	-0.614243	0.3675	-0.1998	1	-1.288	0.001305	-0.07495	0.9371	-1.08205	0.006335	0.1142	1	-1.2392	0.01511
MVLG_02902	190.33	183.19	1102.74	1113.2	851.24	799.74	426.94	628.11	247.22	209.86	201.64	547.82	646.82	842.33	2.728	7.486e-24	2.249	1.264e-14	1.57	1.778e-07	0.2576	0.5099	2.116	1.959e-07	-0.444281	0.3456	-1.156	0.0004074	-2.52334	1.633e-14	-0.651431	0.3035	-0.6877	0.4705	-2.007	6.755e-09	-0.1916	0.8644	-1.309	0.0003241	0.4883	0.5187	-1.83659	7.621e-06
MVLG_02115	2.84	1.87	40.72	31.88	26.03	22.72	17.98	21.31	35.7	28.49	24.85	7.94	22.3	27.57	4.087	1.236e-32	3.454	3.251e-17	3.079	1.622e-16	3.511	5.364e-20	3.379	4.159e-11	-0.596223	0.3457	-1.003	0.02227	-0.628387	0.1347	-0.744954	0.3122	-0.3824	0.9804	0.0401	0.9731	-0.1353	0.9229	0.431918	0.4337	0.2369	0.9544	0.153688	0.7737
MVLG_04524	77.64	75.84	11.35	3.47	16.2	13.43	23.89	18.32	23.94	38.98	25.98	21.22	12.82	6.74	-3.235	3.499e-18	-2.294	7.589e-10	-1.796	6.259e-08	-1.462	6.023e-06	-2.69	1.986e-07	0.965093	0.3457	1.435	0.01156	1.71441	0.0006098	0.493134	0.8547	0.4818	0.9762	0.8094	0.1452	-0.4514	0.8949	0.341755	0.5578	-0.9255	0.3673	1.2317	0.0851
MVLG_05964	54.53	42.41	12.31	6.72	28.29	10.06	32.66	18.84	36.82	29.39	29.7	13.7	21.08	6.86	-2.202	3.574e-08	-1.268	0.00142	-0.8028	0.01733	-0.7111	0.04299	-1.564	0.001617	0.956404	0.3457	1.396	0.01641	1.4374	0.005357	0.587751	0.887	0.449	0.9799	0.5434	0.356	-0.3528	0.8573	0.117404	0.842	-0.7865	0.4045	0.876697	0.1778
MVLG_06778	19.06	15.33	42.73	69.87	47.84	16.23	30.88	29.53	11.58	18.11	22.17	0	41.04	33.25	1.865	2.631e-06	0.9759	0.08695	0.8897	0.0433	0.09699	0.9147	1.253	0.1048	-0.850702	0.3457	-0.9705	0.08886	-1.83085	3.036e-05	-0.650397	0.387	-0.09503	1	-0.8984	0.1434	0.2135	1	-0.793806	0.1355	0.3077	1	-1.15035	0.2043
MVLG_00533	305	373.92	137.32	104.31	81.98	88.16	118.72	123.37	146.1	188.61	199.34	159.65	162.83	175.63	-1.356	8.341e-07	-1.914	4.209e-10	-1.449	1.784e-06	-1.024	0.001782	-0.9183	0.02011	-0.521204	0.3468	-0.08993	0.9105	0.276578	0.5511	0.396122	0.7677	0.452	0.8954	0.8711	0.04142	0.9352	0.1691	0.428549	0.3776	0.4804	0.5353	-0.0915063	0.9325
MVLG_03068	0.9	1.5	685.61	503.98	402.58	432.49	64.38	150.16	6.29	11.4	2.04	75.09	195.97	222.97	9.06	9.295e-70	8.501	3.638e-48	6.389	4.854e-22	2.773	1.08e-05	7.636	2.976e-18	-0.520175	0.347	-2.666	7.808e-12	-6.35684	2.503e-50	-1.44423	0.002183	-2.11	9.818e-05	-5.765	2.972e-38	-0.9116	0.1312	-3.66778	6.549e-14	1.156	0.1836	-4.8807	7.249e-20
MVLG_01186	17.92	26.13	431.85	465.23	470.57	741.79	371.92	684.21	368	249.51	315.52	499.84	321.18	726.3	4.48	2.35e-52	4.879	2.628e-52	4.626	7.334e-45	3.714	3.381e-23	4.655	9.774e-26	0.436546	0.3491	0.1471	0.7676	-0.81572	0.02305	0.133928	0.9757	-0.2659	0.9895	-1.178	0.001005	-0.2793	0.7819	-0.9031	0.01702	-0.02239	0.9986	-0.924571	0.03988
MVLG_06629	20.91	19.84	33.47	46.08	87.57	45.65	82.46	50.16	68.83	40.71	40.04	123.35	49.11	35.29	1.112	0.005936	1.784	4.856e-06	1.807	1.642e-07	1.202	0.0007875	1.465	0.002693	0.699796	0.3491	0.6952	0.2288	0.0371081	0.9602	0.301625	0.8717	0.008902	1	-0.5933	0.2625	-0.3676	0.93	-0.576999	0.2606	-0.3594	0.8582	-0.258275	0.6835
MVLG_01571	42.77	31.98	16.88	18.89	9.97	13.12	17.21	17.68	23.99	37.49	26.86	42.51	17.19	20.21	-0.92	0.003088	-1.605	6.169e-06	-1.064	0.001259	-0.4668	0.1839	-0.7162	0.2066	-0.64832	0.35	-0.1425	0.8621	0.391813	0.419	0.155487	0.9154	0.5274	0.9064	1.114	0.01755	0.8342	0.2864	0.594762	0.2234	0.3093	0.6721	0.234047	0.902
MVLG_03238	233.15	296.67	18.72	8.7	7.7	3.7	5.25	6.08	33.74	25.18	37.29	71.13	24.39	28.41	-4.133	2.172e-31	-5.467	2.222e-34	-5.546	1.865e-39	-3.141	6.754e-22	-3.015	5.095e-10	-1.27046	0.35	-1.391	0.1278	0.941368	0.08217	1.0572	0.2536	NA	NA	2.31	0.0004504	2.348	0.007789	2.41015	2.216e-05	2.452	0.0008865	-0.131114	0.8097
MVLG_06355	286.33	182.21	808.84	930.61	1172	1211.5	1138.87	941.85	901.87	868.76	769.19	740.38	848.94	585.56	2.065	1.438e-14	2.471	1.699e-17	2.248	5.394e-14	1.906	4.035e-08	1.839	5.606e-06	0.440872	0.35	0.1855	0.712	-0.213647	0.6208	-0.262443	0.8524	-0.2354	1	-0.5822	0.1462	-0.6853	0.2762	-0.333551	0.4731	-0.4521	0.4825	0.080894	0.9158
MVLG_05232	105.75	105.22	37.2	34.39	27.66	20.65	31.29	22.24	53.83	59.51	48.79	8.44	56.56	37.67	-1.423	1.127e-06	-2.054	5.596e-10	-1.917	1.343e-09	-1.094	0.0008597	-1.227	0.0006415	-0.594847	0.3501	-0.4892	0.2983	0.273251	0.581	0.156842	1	0.1226	1	0.9415	0.04028	0.7575	0.5116	0.837471	0.05446	0.642	0.5116	0.165775	0.6852
MVLG_03319	46.87	25.52	332.31	333.34	230.91	260.03	100.97	173.06	43.33	40.06	50.66	234.72	176.75	223.33	3.358	6.005e-33	2.868	2.584e-21	1.964	2.067e-10	0.233	0.5692	2.633	2.523e-10	-0.453195	0.351	-1.39	2.602e-05	-3.18003	2.685e-21	-0.762546	0.2432	-0.9107	0.1736	-2.653	3.745e-14	-0.287	0.8065	-1.73764	1.504e-06	0.6107	0.3681	-2.39518	5.469e-09
MVLG_00311	71.01	57.28	4.01	2.65	6.18	9.41	7.01	11.19	30.04	40.03	27.31	8.07	6.39	6.23	-4.127	2.709e-24	-2.948	4.59e-14	-2.864	6.217e-15	-1.098	0.0008406	-3.217	6.659e-10	1.19216	0.3525	1.248	0.09641	2.96826	7.625e-09	0.845661	0.6423	0.07623	1	1.826	0.0003163	-0.3264	0.9205	1.74659	0.0001931	-0.426	0.8381	2.12366	0.0006166
MVLG_03640	5699.76	9239.5	274.92	220.38	353.38	368.26	186.92	583.56	2320.86	509.37	1048.46	2637.5	536.54	768.55	-4.76	1.379e-56	-4.268	8.198e-42	-4.251	6.654e-39	-2.48	5.501e-15	-2.627	7.053e-12	0.526364	0.3525	0.5081	0.2309	2.24476	2.1e-09	2.08725	4.036e-06	0.01398	1	1.784	4.461e-06	1.601	0.001427	1.7728	6.107e-06	1.564	0.001413	0.13833	0.9325
MVLG_04047	12.55	14.83	7.03	5.87	18.73	9.03	6.41	3.7	6.16	4.49	2.31	0	9.02	3.59	-0.9488	0.09959	0.08567	0.9035	-1.287	0.008736	-1.872	9.86e-07	-0.9479	0.05154	1.04956	0.3525	-0.3306	0.7674	-0.984136	0.2507	NA	NA	-1.369	0.3636	-1.975	0.00329	-1.075	0.2462	-0.569815	0.6234	0.2952	1	-0.884741	0.8071
MVLG_04547	7764.78	10216.6	134.96	79.93	202.88	166.23	203.84	140.88	624.22	378.91	349.08	1198.7	329.12	287.2	-6.21	9.405e-75	-5.491	4.399e-56	-5.529	2.774e-56	-4.1	1.638e-35	-4.084	6.52e-23	0.748211	0.3525	0.6822	0.3157	2.06333	1.779e-06	2.0655	0.0002111	-0.05453	1	1.379	0.002342	1.354	0.03253	1.45789	0.0004455	1.428	0.009569	-0.0239337	0.9051
MVLG_05595	2134.95	2189.25	14.82	3.76	9.97	33.4	10.12	17.68	100.72	46.35	79.95	185.14	41.76	74.98	-7.708	1.49e-88	-6.524	1.83e-66	-7.352	8.499e-74	-4.925	1.368e-47	-4.782	6.458e-28	1.19827	0.3525	0.3501	0.7122	2.73555	1.15e-07	2.83829	1.907e-05	-0.8297	0.9491	1.584	0.001885	1.676	0.02114	2.42235	1.242e-06	2.492	0.0001703	-0.158633	0.7352
MVLG_06323	476.34	370.88	494.87	793.9	751.52	985.43	1039.4	1206.88	1033	571.56	1000.47	706.33	675.83	322.75	0.7488	0.004433	1.132	5.4e-05	1.451	6.097e-07	0.8831	0.01146	0.4454	0.2957	0.4165	0.3525	0.7007	0.03789	0.0824146	0.8721	-0.339722	0.7629	0.3065	0.9762	-0.2597	0.5668	-0.732	0.2144	-0.554729	0.1775	-1.045	0.02613	0.444575	0.4181
MVLG_00688	35.05	27.85	48.87	58.76	85.19	83.89	79.14	72.9	118.71	88.17	99.83	135.5	78.7	43.47	0.9268	0.008758	1.524	1.546e-05	1.34	6.105e-05	1.64	3.173e-06	1.319	0.003921	0.628348	0.3529	0.4133	0.4758	0.65951	0.1453	0.34518	0.8313	-0.1962	1	0.1005	0.8854	-0.2584	0.9428	0.31131	0.5688	-0.06005	1	0.322145	0.7748
MVLG_05278	29.54	18.23	91.35	112.49	69.65	74.36	66.53	71.48	96.27	65.7	85.45	109.05	116.4	141.72	2.246	9.685e-15	1.69	3.145e-07	1.579	7.356e-07	1.684	1.517e-06	2.508	3.512e-09	-0.520544	0.3529	-0.6645	0.1113	-0.614657	0.121	0.22221	0.9358	-0.1215	1	-0.02158	0.9747	0.759	0.3533	0.111184	0.8698	0.8762	0.1696	-0.809102	0.1145
MVLG_00178	6.34	8.76	21.65	19.16	32.47	26.16	46.47	36.43	41.29	44.31	41.75	25.58	27.11	28.47	1.557	6.882e-08	2.019	3.7e-11	2.482	4.643e-16	2.32	4.978e-11	1.908	5.725e-06	0.49488	0.3535	0.9258	0.01011	0.70825	0.07738	0.30758	0.8676	0.4498	0.8749	0.2842	0.5752	-0.169	0.918	-0.151353	0.7813	-0.6174	0.3276	0.42794	0.4717
MVLG_00334	96.37	77.97	198.55	270.9	282.19	363.42	319.96	340.56	309.47	274.33	265.01	287.28	281.59	233.39	1.577	6.124e-09	1.991	8.243e-12	1.975	3.779e-11	1.609	3.268e-06	1.707	2.625e-05	0.449262	0.3535	0.3983	0.3358	-0.0228688	0.9637	0.0902372	0.9997	-0.0294	1	-0.3988	0.3595	-0.3381	0.7298	-0.358319	0.4362	-0.3132	0.6797	-0.0860763	0.9273
MVLG_03655	521.97	451.23	286.59	289.29	166.36	256.36	128.96	254.37	166.37	134.57	144.12	45.93	147.02	172.85	-0.6148	0.0239	-1.1	0.0001515	-1.304	1.438e-05	-1.832	8.699e-09	-1.716	1.109e-06	-0.447225	0.3535	-0.6869	0.06292	-1.26972	0.0001878	-1.13832	0.008267	-0.2145	1	-0.7483	0.05646	-0.68	0.2266	-0.527477	0.2144	-0.4789	0.37	-0.0871567	1
MVLG_04191	0.35	0.08	326.6	286.8	181.26	269.22	68.8	158.58	8.18	6.96	19.41	100.95	217.47	223.91	10.57	9.565e-104	10.09	7.546e-81	9.021	2.242e-66	5.648	7.959e-28	9.871	4.99e-39	-0.446388	0.3537	-1.55	2.08e-06	-4.99074	3.418e-44	-0.724193	0.1971	-1.074	0.05045	-4.467	5.921e-34	-0.2641	0.7528	-3.39593	1.803e-20	0.7893	0.2391	-4.23685	4.304e-23
MVLG_04747	91.9	56.4	15.53	19.12	33.99	23.46	42.56	26.85	33.55	64.61	48.26	33.42	31.58	29.64	-1.944	6.01e-09	-1.283	0.0002392	-1.007	0.001662	-0.6742	0.04625	-1.144	0.01299	0.690704	0.3546	0.9379	0.06471	1.20624	0.006985	0.752694	0.5244	0.2607	1	0.5853	0.2669	0.08195	1	0.343022	0.5123	-0.1652	0.9211	0.472658	0.5181
MVLG_00408	80.03	78	205.99	191.47	140.14	155.27	135.23	169.53	145.35	169.21	154.61	151.66	212.29	250.12	1.466	2.86e-08	0.9872	0.0007613	0.9839	0.001015	0.8522	0.01539	1.494	0.0002041	-0.442793	0.3549	-0.4791	0.2231	-0.669605	0.06795	-0.0111901	1	-0.01419	1	-0.1533	0.7616	0.4484	0.6267	-0.129277	0.8105	0.4568	0.5376	-0.623445	0.2292
MVLG_00896	29.55	29.21	82.29	71.12	56.52	57.02	72.13	56.55	41.59	64.05	63.05	48.51	80.2	80.8	1.516	1.267e-08	1.028	0.000535	1.163	0.0001052	0.7921	0.02539	1.375	0.0008153	-0.452139	0.3572	-0.3494	0.4082	-0.781671	0.03019	-0.179332	0.9045	0.1219	1	-0.2555	0.5861	0.2875	0.8418	-0.365816	0.4261	0.1648	0.9039	-0.564561	0.3095
MVLG_02709	17.93	26.01	111.7	116.7	79.07	91.02	76.23	94.28	39.31	58.46	64.49	86.48	114.34	113.28	2.502	1.577e-20	2.027	3.614e-12	1.98	3.437e-11	1.149	0.0009679	2.334	8.063e-09	-0.440357	0.3572	-0.5213	0.1749	-1.41152	2.402e-05	-0.209459	0.8888	-0.05869	1	-0.896	0.01737	0.2487	0.8657	-0.829189	0.03104	0.3015	0.7315	-1.16875	0.006653
MVLG_03997	254.13	260.34	61.25	80.19	90.97	113.43	128.86	112.83	261.41	193.28	237.79	158.83	135.88	79.28	-1.723	1.62e-09	-1.239	5.281e-05	-1.041	0.0006521	-0.264	0.4758	-1.035	0.01359	0.516437	0.3572	0.6807	0.09641	1.40568	0.0002224	0.64183	0.4605	0.1833	1	0.9604	0.02031	0.1476	0.9371	0.790454	0.05983	-0.03534	1	0.779393	0.139
MVLG_04632	26.84	20.21	73.53	80.78	123.83	97.95	155.19	161.33	107.31	156.55	176.85	57.41	82.85	122.01	1.859	1.854e-10	2.319	6.362e-14	2.797	1.626e-19	2.55	8.314e-13	2.112	8.495e-07	0.492156	0.3572	0.9395	0.008799	0.632007	0.1236	0.213107	0.9665	0.4685	0.8577	0.2126	0.6986	-0.2652	0.7848	-0.245611	0.6157	-0.7363	0.1768	0.454542	0.3842
MVLG_04516	0	0	9.36	12.46	20.74	18.69	33.2	60.14	15.55	34.95	51.21	50.82	40.2	67.12	10.32	3.583e-10	11.1	1.366e-13	12.3	5.187e-43	12.08	3.255e-45	12.23	2.583e-21	0.819048	0.3574	1.938	2.765e-05	1.3846	0.006379	2.17785	0.000377	1.147	0.1518	0.6322	0.2859	1.38	0.06292	-0.523419	0.2328	0.2158	0.8942	-0.796872	0.1454
MVLG_01556	6.27	4.11	21.12	24.42	22.33	7.22	15.73	13.27	30.99	24.96	26.37	17.03	31.19	44.79	2.277	2.067e-10	1.574	0.0006636	1.541	4.879e-05	2.268	3.933e-10	2.852	1.163e-09	-0.66804	0.3577	-0.7316	0.1623	-0.0651086	0.9095	0.531576	0.7541	-0.04146	1	0.68	0.1985	1.216	0.1549	0.737992	0.1311	1.262	0.06913	-0.565188	0.4274
MVLG_03981	61.57	51.67	109.69	116.42	165.89	152.31	154.61	178.86	183	185.28	183.04	176.48	157.19	102.08	1.14	4.35e-05	1.575	1.007e-07	1.602	9.41e-08	1.586	4.591e-06	1.385	0.0007391	0.468163	0.3577	0.4631	0.2552	0.390222	0.3628	0.20344	0.9207	0.01674	1	-0.006269	0.9924	-0.2424	0.867	-0.0116842	0.9789	-0.2628	0.7723	0.208079	0.7979
MVLG_01797	12.43	7.11	26.37	35.65	50.39	37.95	52.24	48.42	58.51	54.94	64.37	64.55	33.28	18.84	1.814	1.627e-10	2.256	8.582e-14	2.408	3.325e-15	2.454	4.381e-12	1.814	1.158e-05	0.473631	0.3593	0.5944	0.1319	0.583069	0.1515	-0.0442335	1	0.1416	1	0.1809	0.7403	-0.4839	0.6907	0.0527155	0.9421	-0.6233	0.4308	0.623784	0.347
MVLG_03120	113.03	99.59	46.9	42.06	30.61	33.88	43.83	34.6	72.04	71.64	71.25	64.95	67.18	55.63	-1.122	3.695e-05	-1.638	4.024e-08	-1.401	2.895e-06	-0.726	0.03151	-0.7176	0.07755	-0.479708	0.3593	-0.2751	0.5625	0.342494	0.4327	0.365181	0.7714	0.2231	1	0.8947	0.03081	0.8648	0.1922	0.685361	0.1105	0.6427	0.3208	0.0030707	1
MVLG_00858	110.85	69.89	17.94	17.17	27.49	26.68	43.04	25.42	15.25	20.18	21.52	13.96	19.7	17.13	-2.217	4.472e-13	-1.649	2.988e-07	-1.329	1.445e-05	-2.354	1.625e-13	-2.227	1.194e-07	0.601049	0.3607	0.8917	0.04776	-0.194804	0.6968	-0.0508204	1	0.3039	1	-0.7254	0.1045	-0.636	0.4854	-1.01149	0.01181	-0.9293	0.1508	-0.118422	0.9347
MVLG_04924	48.22	44.07	67.48	90.68	120.55	109.57	100.38	75.13	95	108.05	106.61	46.94	139.88	122.35	0.9208	0.002373	1.404	8.068e-06	0.9898	0.00202	1.079	0.002106	1.477	0.0008717	0.51447	0.3607	0.06952	0.9502	0.0999615	0.8646	0.515081	0.7307	-0.4274	0.9147	-0.3426	0.468	0.009341	0.996	0.100954	0.8762	0.4395	0.6716	-0.371081	0.6667
MVLG_05035	4.63	5	34.67	25.79	52.97	35.38	49.28	34.64	67.72	126.49	75.46	36.27	20.66	26.68	2.779	1.176e-18	3.261	6.533e-23	3.166	2.317e-22	4.09	1.239e-26	2.453	7.45e-08	0.514128	0.3607	0.3905	0.4388	1.25011	0.00114	-0.370283	0.8774	-0.1068	1	0.8068	0.05768	-0.8579	0.2923	0.930157	0.02317	-0.7434	0.3344	1.63646	0.0007997
MVLG_06149	22.59	31.88	79.34	84	121.96	108.47	149.24	121.93	357.65	248.83	263.38	192.28	176.3	67.92	1.712	1.278e-09	2.15	9.475e-13	2.348	1.212e-14	3.262	3.002e-19	2.394	5.763e-09	0.470222	0.3614	0.6362	0.103	1.49985	4.338e-05	0.638848	0.4081	0.1854	1	1.1	0.005135	0.1925	0.8858	0.929692	0.02069	0.007613	1	0.876235	0.07082
MVLG_00365	221.04	239.31	37.52	24.17	68.69	35.12	35.73	63.2	99.03	51.97	46.64	148.51	35.78	56.49	-2.754	4.645e-17	-2.078	7.265e-10	-2.235	3.794e-11	-1.919	4.004e-09	-1.907	0.0001414	0.705372	0.3615	0.5165	0.3596	0.788477	0.09462	0.790804	0.3652	-0.1578	1	0.1495	0.8139	0.1257	0.8721	0.308837	0.6169	0.2639	0.7293	-0.020408	0.8863
MVLG_06684	37.98	34.89	14.08	14.4	11.27	6.44	10.33	7.88	15.77	20.84	16.88	18.16	15.84	9.43	-1.219	0.0001604	-1.972	1.387e-07	-1.935	1.769e-08	-1.156	0.0004358	-1.355	0.004711	-0.715945	0.3615	-0.7116	0.1829	0.0030872	0.9929	-0.180102	0.9934	0.02356	1	0.7959	0.149	0.5545	0.6869	0.789182	0.1085	0.5409	0.5505	0.205746	0.8666
MVLG_05125	18.29	13.98	54.92	19.92	29.17	19.22	39.61	24.13	22.43	43.75	42.33	24.36	106.47	179.7	1.357	5.533e-05	0.6639	0.1264	1.073	0.002188	1.105	0.002124	3.021	3.785e-12	-0.652757	0.3628	-0.2736	0.6394	-0.307662	0.5132	1.62652	0.003302	0.3928	0.9892	0.4194	0.4989	2.287	4.805e-05	0.0447865	0.9606	1.909	0.000269	-1.89642	1.239e-05
MVLG_02177	90.73	97.07	19.57	35.14	57.89	32.33	52.86	39.81	117.2	74.74	81.98	51.71	40.3	16.99	-1.639	1.209e-06	-0.9875	0.005531	-0.9473	0.004101	-0.148	0.7164	-1.423	0.003737	0.678696	0.3645	0.6895	0.216	1.43808	0.0008413	0.166987	0.9836	0.02769	1	0.8282	0.07949	-0.4917	0.7461	0.820741	0.06437	-0.5123	0.6635	1.29178	0.02413
MVLG_02192	138.24	128.12	204.6	192.42	245.31	306.57	101.56	173.32	68.01	43.31	48.27	92.95	161.45	165.93	0.7217	0.01208	1.151	0.0001273	0.07324	0.8088	-1.404	2.401e-05	0.3597	0.5445	0.464944	0.3645	-0.647	0.1268	-2.17631	4.855e-10	-0.401372	0.6587	-1.084	0.06244	-2.569	8.613e-13	-0.8526	0.1476	-1.47949	0.0001014	0.214	0.908	-1.73328	0.0001447
MVLG_04967	18.8	13.23	68.61	82.14	51.06	50.85	37.88	41.73	24.14	27.7	37.55	48.71	87.51	98.48	2.385	3.018e-14	1.764	2.334e-06	1.354	0.0001236	0.8436	0.02259	2.57	9.563e-09	-0.585322	0.3645	-1.028	0.01578	-1.59949	1.546e-05	0.144533	1	-0.4193	0.9762	-0.9396	0.03802	0.7416	0.4588	-0.512536	0.2906	1.154	0.07667	-1.71287	0.0002226
MVLG_06492	67.22	72.25	15	20.95	40.38	26.56	33.3	49.71	44.91	49.01	46.83	46.86	20.33	36.51	-1.812	6.368e-06	-0.9792	0.01762	-0.7523	0.05091	-0.6118	0.08231	-1.113	0.06122	0.855991	0.3645	1.05	0.08672	1.14095	0.03202	0.640196	0.7283	0.2205	1	0.3496	0.6141	-0.1873	0.9994	0.127898	0.9071	-0.4248	0.774	0.497884	0.6731
MVLG_03110	13.48	16.72	28.67	27.87	50.6	31.12	53.67	51.88	27.93	28.47	28.77	21.76	40.54	35.3	1.032	0.0004192	1.493	1.125e-06	1.832	1.536e-09	0.7518	0.03581	1.286	0.003534	0.491898	0.368	0.8007	0.0337	-0.335588	0.4365	0.211923	0.9755	0.3297	0.9762	-0.7571	0.06328	-0.268	0.7765	-1.07324	0.0044	-0.5993	0.2997	-0.510538	0.4357
MVLG_03135	44.08	33.23	108.01	145.15	84.7	83.75	70.01	78.04	51.73	60.59	58.45	103.66	50.39	55.27	1.871	5.816e-09	1.232	0.001608	1.001	0.005023	0.5945	0.1182	0.7762	0.1424	-0.604101	0.368	-0.8684	0.06025	-1.33702	0.0005671	-1.13705	0.1964	-0.2406	1	-0.6584	0.1843	-0.5092	0.7859	-0.409486	0.4237	-0.2734	0.8855	-0.185988	0.7936
MVLG_05857	0.67	0.58	22.31	23.62	32.46	37.18	22.05	30.39	22.46	37.34	21.66	9.01	38.72	32.28	5.324	2.284e-30	5.872	6.763e-35	5.381	1.727e-38	5.332	1.621e-33	5.784	1.469e-19	0.58039	0.368	0.05631	0.9581	-0.0579917	0.911	0.421709	0.8888	-0.4984	0.9309	-0.5685	0.2194	-0.1497	0.8739	-0.0669884	0.8864	0.3321	0.8877	-0.436895	0.6488
MVLG_03085	312.71	248.72	362.44	478.42	739.23	456.14	736.4	692.77	261.73	338.07	289.3	281.07	353.31	271.54	0.751	0.009596	1.193	8.124e-05	1.456	1.316e-06	0.2055	0.6149	0.4366	0.4158	0.472372	0.3689	0.7055	0.0642	-0.605228	0.1204	-0.354814	0.7662	0.2538	1	-1.007	0.008742	-0.8141	0.1924	-1.24667	0.0006537	-1.068	0.03613	-0.213355	0.8229
MVLG_00357	35.75	30.39	65.51	92.97	120.46	115.09	121.11	105.41	111.68	78.88	95.25	99.55	47.85	94.84	1.411	1.878e-05	1.929	1.245e-08	1.847	1.156e-08	1.473	2.852e-05	1.307	0.005267	0.548773	0.3701	0.4355	0.4054	0.0079864	1	-0.151867	1	-0.09453	1	-0.4701	0.3268	-0.6743	0.5111	-0.36031	0.4782	-0.5759	0.5187	0.168853	0.9051
MVLG_03347	67.19	48.48	7.69	4.58	10.18	13.8	24.91	20.96	11.26	22.15	19.72	18.65	12.67	10.72	-3.092	5.782e-16	-2.176	1.248e-08	-1.276	0.0001194	-1.768	3.461e-08	-2.12	2.674e-05	0.940085	0.3701	1.809	0.0006259	1.26205	0.02466	0.914742	0.5335	0.8815	0.5897	0.3817	0.6103	-0.005609	1	-0.491068	0.3036	-0.8801	0.3645	0.345394	0.8027
MVLG_06131	54.23	48.37	15.93	12.12	24.26	20.4	33.25	26.91	40.99	36.52	35.1	7.39	18.69	20.98	-1.734	1.001e-07	-1.122	0.001125	-0.7205	0.0265	-0.5921	0.09066	-1.38	0.0009481	0.64306	0.3701	1.015	0.02493	1.08891	0.01232	0.309816	0.9635	0.3882	0.9799	0.5139	0.3204	-0.3188	0.7754	0.141145	0.8183	-0.7036	0.2871	0.808772	0.1135
MVLG_07150	129.24	72.96	37.36	29.22	20.81	14.17	20.01	14.04	12.09	8.79	8	0	25.39	39.13	-1.433	9.39e-05	-2.428	7.081e-08	-2.427	3.519e-10	-3.465	2.582e-22	-1.587	0.0001189	-0.947723	0.3701	-0.9815	0.1595	-2.08841	7.899e-05	-0.194042	0.9007	-0.01364	1	-1.055	0.1826	0.7675	0.8518	-1.02302	0.1237	0.7977	0.6121	-1.85149	0.02647
MVLG_00442	28.62	20.57	117.5	110.6	90.01	81.21	106.62	83.04	138.12	87.21	92.55	112.73	125.37	92.27	2.355	3.373e-18	1.882	1.726e-10	1.989	3.406e-11	1.948	2.128e-08	2.222	4.458e-08	-0.43756	0.3713	-0.3623	0.3832	-0.455361	0.2447	-0.170284	0.9421	0.0946	1	0.0524	0.9376	0.2867	0.8083	-0.0260405	0.9671	0.1921	0.8435	-0.260746	0.7093
MVLG_07232	1.25	1.83	32.08	22.24	18.64	17.26	22.25	16.12	12.87	21.07	14.95	0	26.82	34.92	4.263	2.371e-30	3.609	6.665e-15	3.691	3.552e-22	3.294	3.415e-17	4.214	2.113e-15	-0.615766	0.3758	-0.5658	0.2613	-1.02809	0.009576	-0.0877605	0.8774	0.06612	1	-0.339	0.5259	0.5365	0.8616	-0.388539	0.4579	0.4789	0.8303	-0.899433	0.2536
MVLG_02048	32.27	33.75	10.31	14.94	3.73	8.41	1.28	2.95	2.89	3.06	2.16	0	4.04	17.33	-1.249	0.001099	-2.349	9.987e-07	-4.151	2.603e-15	-3.704	2.551e-24	-1.781	0.0001258	-1.05157	0.3765	-2.847	0.0002599	-2.51778	3.54e-06	-0.575315	0.6507	NA	NA	-1.38	0.1045	0.4948	0.9907	0.428837	0.8553	NA	NA	-1.92013	0.04541
MVLG_04574	23.31	20.69	52.64	36.61	73.88	62.43	76.88	88.24	55.21	61.39	53.59	33.25	82.54	78.05	1.165	0.0006881	1.716	8.951e-07	1.948	1.341e-09	1.29	0.0002679	1.891	3.86e-05	0.583675	0.3765	0.7848	0.07942	0.0700436	0.9253	0.684659	0.574	0.223	1	-0.4443	0.3591	0.1122	1	-0.658468	0.128	-0.1176	0.8515	-0.577758	0.4236
MVLG_06020	547.89	316.61	1501.34	2062.72	2725.17	2105.46	2132.85	2195.1	1819.26	1271.79	1102.45	2068.66	1285.59	1076.62	2.223	6.961e-17	2.607	1.861e-19	2.444	2.235e-16	1.818	1.505e-07	1.922	1.395e-06	0.416519	0.3765	0.2222	0.6312	-0.45668	0.2373	-0.338239	0.7904	-0.1733	1	-0.8041	0.0336	-0.7322	0.2485	-0.614903	0.1321	-0.5607	0.3777	-0.0968718	0.9028
MVLG_06349	1.67	1.67	21.63	2.69	7.17	4.62	2.06	2.84	3.98	10.11	2.17	0	4.67	13.91	2.993	3.353e-08	1.89	0.01523	0.494	0.5621	1.716	2.914e-05	2.346	0.007299	-1.05152	0.3765	-2.454	0.0007438	-1.34122	0.009613	-0.679772	0.574	NA	NA	-0.2083	0.7921	0.3908	1	1.19899	0.203	NA	NA	-0.651572	0.7633
MVLG_06571	105.63	97.98	3.97	3.92	7.48	7.99	8.79	5.93	44.59	46.79	38.94	6.83	9.9	14.14	-4.551	1.776e-34	-3.637	9.988e-23	-3.699	5.042e-26	-1.368	2.366e-05	-3.077	2.399e-12	0.934983	0.3765	0.8473	0.3269	3.12598	4.173e-11	1.40915	0.197	-0.07794	1	2.249	1.78e-06	0.4926	0.8065	2.34906	4.594e-08	0.587	0.6467	1.72103	0.0007722
MVLG_06718	36.06	32.37	63.17	88.48	134.02	101.16	109.22	94.49	92.07	76.65	66.85	96.52	59.8	89.11	1.301	0.0002341	1.874	1.564e-07	1.657	8.092e-07	1.183	0.0009343	1.346	0.005689	0.602458	0.3765	0.3554	0.5667	-0.174681	0.7582	-0.0029166	1	-0.2284	1	-0.707	0.1281	-0.5816	0.6028	-0.462025	0.3586	-0.3491	0.7805	-0.154363	0.8588
MVLG_06642	218.54	182.61	744.67	909.57	561.91	691.93	373.47	502.85	323.83	190.94	259.52	581	519.16	545.3	2.189	6.896e-17	1.743	6.949e-10	1.179	6.571e-05	0.2513	0.5172	1.532	0.0001018	-0.410872	0.3767	-1.009	0.001721	-1.98807	8.887e-10	-0.695267	0.2617	-0.5757	0.6134	-1.504	1.439e-05	-0.2621	0.8046	-0.916816	0.01526	0.3072	0.6976	-1.26895	0.002352
MVLG_00699	232.8	220.7	12	6.54	4.35	2.8	1.99	8.03	32.08	16.05	19.31	13.34	14.96	10.04	-4.47	1.612e-35	-5.905	4.085e-38	-5.788	1.833e-40	-3.501	7.387e-26	-4.008	4.722e-17	-1.36492	0.378	-1.298	0.3157	0.920271	0.09311	0.412197	0.9503	NA	NA	2.39	0.0004923	1.782	0.2407	2.2629	0.0002244	1.642	0.2107	0.535191	0.5404
MVLG_01255	7.49	10.21	6.94	4.81	2.75	1.78	1.9	2.18	2.78	0.56	0.51	0	0.6	2.15	-0.4633	0.3826	-1.898	0.005538	-2.132	0.0001019	-3.564	8.229e-15	-2.881	0.0002417	-1.3654	0.378	-1.638	0.07298	-3.1475	0.0002099	NA	NA	NA	NA	-1.667	0.4291	NA	NA	-1.41115	0.3554	NA	NA	-0.596923	1
MVLG_03396	2.95	8.27	5.74	27.22	2.58	9.85	2.61	2.03	384.05	101.95	332.76	215.39	162.55	8.59	1.671	0.009155	0.2389	0.9363	-1.174	0.2008	5.499	1.275e-39	4.362	4.199e-19	-1.36481	0.378	-2.763	0.002985	3.78268	5.088e-17	2.62258	1.242e-05	NA	NA	5.251	3.094e-21	3.995	7.011e-08	6.69038	1.65e-29	5.375	1.444e-11	1.14423	0.02984
MVLG_06661	5.3	4.82	4.08	5.47	18.18	7	26.06	12.92	52.12	130.55	71.49	0	3.47	8.28	0.06145	0.9465	1.384	0.03196	2.09	8.486e-07	4.019	7.674e-25	0.1393	0.9878	1.32271	0.378	2.007	0.01039	3.88859	3.763e-13	NA	NA	0.6836	0.9652	2.61	1.461e-07	NA	NA	1.94608	4.298e-06	-1.933	0.02285	3.87604	3.772e-11
MVLG_06760	3.61	2.92	15.92	14.35	7.13	4.56	10.48	3.75	12.91	42.37	15.02	0	5.93	10.64	2.359	0.0001263	0.9239	0.396	1.376	0.04835	2.901	3.279e-13	1.34	0.3111	-1.36587	0.378	-0.9663	0.1949	0.470218	0.5364	-1.03815	0.4617	0.4231	1	1.94	0.01326	NA	NA	1.52986	0.007338	NA	NA	1.54287	0.02065
MVLG_00010	77.64	53.31	127.43	164.49	206.21	216.1	278.95	184.62	149.48	120.8	118.52	305.34	148.86	139.91	1.32	1.91e-05	1.803	1.956e-08	1.924	7.152e-10	0.9899	0.005212	1.541	0.0003577	0.516259	0.381	0.6057	0.1656	-0.385102	0.392	0.175198	0.9232	0.1053	1	-0.8304	0.0473	-0.3127	0.8675	-0.917837	0.02264	-0.4093	0.6976	-0.553483	0.3071
MVLG_00428	113.51	114.42	65.73	71.83	34.37	44.57	17.07	37.02	65.58	49.94	49.71	40.54	60.1	58.75	-0.5706	0.1276	-1.417	0.001095	-2.165	3.857e-07	-1.036	0.002715	-0.7194	0.152	-0.8061	0.3812	-1.586	0.01217	-0.520112	0.3101	-0.192617	0.9665	-0.7458	0.9762	0.3634	0.6207	0.6256	0.7736	1.10883	0.07024	1.339	0.1958	-0.294131	0.8194
MVLG_00895	44.07	112.09	32.15	11.15	41.2	30.17	41.71	41.68	130.73	50.83	96.46	136.64	52.72	52.87	-1.733	3.542e-07	-1.074	0.002962	-0.8837	0.008906	0.09334	0.8197	-0.2106	0.8588	0.688725	0.3812	0.848	0.1044	1.78551	2.35e-05	1.46334	0.01693	0.1783	1	1.162	0.01036	0.8086	0.2686	0.996994	0.02234	0.633	0.3482	0.30202	0.8182
MVLG_01717	60.06	36.13	384.3	364.54	249.36	310.31	166.02	250.43	121.44	90.57	123.41	295.7	271.04	290.51	3.116	2.402e-29	2.65	7.317e-19	2.167	1.124e-12	1.136	0.001152	2.68	7.818e-11	-0.428979	0.3812	-0.9447	0.006123	-2.03157	8.182e-10	-0.473129	0.5954	-0.4917	0.8194	-1.529	1.828e-05	-0.02309	1	-1.02943	0.00651	0.4591	0.5329	-1.53366	0.0002709
MVLG_04314	19.48	16.35	19.41	21.25	43.38	29.14	27.27	25.67	51.64	76.63	49.66	60.23	25.87	21.98	0.3316	0.4942	1.1	0.01197	0.6233	0.1265	1.687	2.351e-06	0.7424	0.1633	0.795502	0.3812	0.2913	0.7575	1.2934	0.008053	0.359543	0.8876	-0.4857	0.9727	0.5641	0.3193	-0.4091	0.8998	1.06412	0.0266	0.07758	0.9627	0.939159	0.2375
MVLG_04339	858.66	601.34	1700.79	1921.15	2731	2168.81	2275.94	2065.8	1591.22	927.79	797.68	1820.52	949.8	755.07	1.482	1.377e-08	1.857	4.486e-11	1.668	1.237e-08	0.6408	0.07324	0.7429	0.06793	0.408067	0.3812	0.1889	0.6906	-0.889104	0.0113	-0.77573	0.2288	-0.1988	1	-1.229	0.0005025	-1.157	0.02368	-1.01315	0.006024	-0.9593	0.06623	-0.0989205	0.8875
MVLG_05663	83.25	92.2	24.98	16.99	5.62	13.41	19.9	17.7	22.99	34.19	24.27	52.33	37.93	43.38	-1.914	1.091e-06	-3.095	6.388e-10	-2.147	3.297e-08	-1.684	2.944e-07	-0.9069	0.09616	-1.12414	0.3812	-0.2285	0.8546	0.169863	0.8851	0.950624	0.4356	0.9198	0.9697	1.385	0.07088	2.085	0.03326	0.464807	0.5123	1.188	0.169	-0.776791	0.2266
MVLG_06877	141.11	135.45	821.9	939.22	699.06	630.31	262.92	491.42	177.16	125.26	164.42	189.07	467.95	498.69	2.828	4.632e-25	2.367	1.153e-15	1.506	7.21e-07	0.1827	0.6505	1.849	1.111e-05	-0.427291	0.3812	-1.321	6.165e-05	-2.69749	4.152e-16	-1.01743	0.02502	-0.8668	0.2012	-2.198	2.868e-10	-0.5808	0.345	-1.32387	0.0003356	0.2723	0.8432	-1.63676	0.0001734
MVLG_01475	1165.63	1458.86	108.18	126.93	163.43	184.06	289.99	289.97	1210.83	729.23	742.32	548.73	181.61	169.92	-3.333	2.045e-29	-2.816	1.283e-19	-2.109	3.295e-12	-0.5605	0.1067	-2.33	3.197e-08	0.549342	0.3818	1.222	0.001324	2.72315	1.432e-12	0.949728	0.1294	0.6927	0.549	2.242	1.189e-08	0.438	0.5701	1.56305	5.031e-05	-0.2519	0.8897	1.75651	0.0002472
MVLG_00991	133.9	142.82	45.39	50.41	91.56	52	106.81	55.56	96.51	47.91	65.3	105.42	39.77	37.48	-1.391	4.548e-06	-0.8796	0.006905	-0.6925	0.02465	-1.116	0.0008152	-1.476	0.003125	0.541375	0.3819	0.6998	0.1309	0.226561	0.6574	-0.134521	1	0.1721	1	-0.2455	0.6636	-0.6423	0.6372	-0.392601	0.446	-0.7971	0.3895	0.354619	0.7922
MVLG_03294	30.97	8.56	35.77	68.28	20.97	48.6	26.38	43.12	26.36	35.16	30.93	64.25	37.92	24.23	1.566	8.238e-07	0.9475	0.01521	0.8289	0.01713	0.5879	0.121	0.9596	0.04716	-0.582152	0.382	-0.7378	0.1476	-1.04242	0.007716	-0.647415	0.6325	-0.1263	1	-0.3865	0.4678	-0.04447	1	-0.262921	0.5971	0.06292	0.9763	-0.3819	0.5328
MVLG_02208	0.27	0.53	2954.89	4350.65	2530.04	3058.77	1262.79	2682.51	176.19	235.35	337.95	3241.3	2860.58	2323.81	13.23	1.185e-163	12.8	3.154e-134	12.27	1.966e-123	9.186	1.616e-66	12.78	2.578e-67	-0.396542	0.3841	-0.9681	0.002336	-4.11691	3.281e-35	-0.474461	0.5491	-0.5484	0.65	-3.643	6.053e-27	-0.05503	0.992	-3.08713	9.88e-20	0.4862	0.4551	-3.61396	3.539e-20
MVLG_03833	66.11	60.08	115.94	129.71	144.58	190.2	142.69	150.22	111.3	104.62	91.96	51.79	113.48	88.25	1.101	6.542e-05	1.503	3.018e-07	1.256	2.993e-05	0.5786	0.1115	0.6504	0.1841	0.436593	0.3841	0.1562	0.7676	-0.577795	0.1349	-0.489994	0.5169	-0.2591	0.995	-0.9415	0.01316	-0.9143	0.09037	-0.671412	0.1011	-0.6612	0.2236	-0.0457578	1
MVLG_02333	14.96	12.31	40.16	56.14	67.41	67.23	72.7	61.29	82.6	80.99	82.08	95.44	61.93	43.51	1.961	4.032e-12	2.386	3.017e-15	2.336	2.304e-14	2.44	5.844e-12	2.222	8.713e-08	0.457562	0.3856	0.3747	0.3983	0.421905	0.3201	0.217636	0.8904	-0.06288	1	0.0366	0.9675	-0.2118	0.9221	0.112888	0.8553	-0.1478	0.9323	0.215046	0.8273
MVLG_01005	4.93	4.01	47.55	51.05	47.23	17.75	23.06	17.83	2.65	6.2	7.58	18.99	42.72	32.5	3.607	1.833e-20	2.928	5.682e-09	2.281	2.448e-07	0.3933	0.5071	3.177	7.274e-09	-0.643845	0.3863	-1.319	0.005237	-3.27568	4.926e-15	-0.46885	0.7238	-0.6546	0.8872	-2.554	3.999e-07	0.1897	1	-1.88334	6.089e-05	0.8509	0.4212	-2.78543	1.68e-07
MVLG_04859	0.03	0	51.34	38.56	23.28	38.53	8.7	18.44	0.65	1.98	4.01	17.76	69.38	78.47	11.25	4.969e-51	10.66	8.555e-30	9.317	7.47e-21	6.943	2.871e-14	11.62	1.451e-28	-0.543478	0.3881	-1.939	4.652e-06	-4.4566	1.817e-29	0.446572	0.8312	-1.361	0.08768	-3.839	7.609e-19	0.9966	0.2174	-2.49027	3.511e-08	2.319	6.292e-05	-4.87534	3.519e-25
MVLG_01271	99.77	136.14	27.64	32.75	55.27	40.34	48.67	42.35	53.2	46.15	59.52	61.73	47.11	67.1	-1.833	1.229e-08	-1.234	0.0002725	-1.325	4.483e-05	-1.257	0.0001282	-0.9301	0.04063	0.628388	0.3885	0.506	0.3703	0.520971	0.2876	0.850952	0.3737	-0.1038	1	-0.03735	0.9595	0.2445	0.9122	0.0810893	0.9118	0.3524	0.7315	-0.317046	0.674
MVLG_03460	54.79	47.45	17.28	13.31	30.42	18.04	42.91	24.11	54.77	55.21	49.26	23.19	24.52	21.89	-1.603	8.353e-07	-1.007	0.003366	-0.537	0.09069	-0.07917	0.8413	-1.043	0.02196	0.626656	0.3885	1.068	0.01723	1.46962	0.0004108	0.514933	0.7444	0.4546	0.954	0.9117	0.0459	-0.09259	0.992	0.478744	0.3079	-0.5331	0.5334	0.976127	0.07099
MVLG_06971	97.37	102.19	286.53	317	258.7	200.13	232.25	238.55	102.26	142.51	138.93	147.04	287.66	278.58	1.736	8.453e-11	1.277	1.492e-05	1.283	1.798e-05	0.2742	0.4857	1.454	0.0004278	-0.426916	0.3886	-0.4517	0.2617	-1.52074	5.567e-06	-0.321544	0.7444	-0.003465	1	-1.021	0.006368	0.1167	0.9935	-1.00611	0.007258	0.1174	0.9673	-1.1585	0.009449
MVLG_04420	127.71	121.98	48.56	37.51	36.7	21.25	32.7	30.18	62.95	75.58	88.01	40.5	58.62	23.69	-1.396	4.14e-06	-2.035	4.14e-09	-1.94	3.639e-09	-0.814	0.01521	-1.444	0.0005929	-0.602794	0.3889	-0.5398	0.3071	0.526594	0.2494	-0.0886555	0.9896	0.08442	1	1.205	0.00876	0.5275	0.7006	1.13213	0.009325	0.4433	0.6706	0.646927	0.2569
MVLG_03208	109.44	87.06	366.62	346.11	278.89	259.16	188.91	247.01	116.37	107.34	119.96	313.14	217.54	295.58	2.008	7.851e-14	1.545	1.465e-07	1.2	7.286e-05	0.1451	0.7313	1.564	0.0001188	-0.427525	0.3896	-0.8045	0.02372	-1.91623	7.746e-09	-0.482554	0.6117	-0.354	0.9716	-1.416	8.61e-05	-0.03263	1	-1.05229	0.005202	0.3156	0.6977	-1.41137	0.0009817
MVLG_03561	65.9	54.09	26.24	23.36	12.4	13.9	29.54	29.37	44.06	20.74	25.41	38.23	13.03	11.68	-1.124	0.002412	-2.093	4.06e-06	-0.9742	0.007974	-1.136	0.001184	-1.937	0.002012	-0.9242	0.3896	0.1511	0.9165	-0.0611045	0.9785	-0.849372	0.7561	1.099	0.5184	0.9446	0.1431	0.09628	0.9957	-0.147473	0.8659	-0.999	0.4126	0.81568	0.4698
MVLG_03887	49.92	43.22	24.54	13.52	9.81	11.03	20.69	21.97	23.59	29.62	26.86	15.06	20.93	26.24	-1.146	0.002053	-2.069	5.695e-06	-1.092	0.003203	-0.8698	0.01042	-0.9104	0.07063	-0.877347	0.3896	0.05608	0.9865	0.219297	0.7584	0.190251	0.9984	0.9575	0.7031	1.177	0.0603	1.081	0.3756	0.220361	0.7801	0.1266	1	0.04737	0.9763
MVLG_04590	147.49	169.91	31.85	23.31	16.65	13.67	8.86	22.49	51.64	36.11	34.19	66.15	22.22	23.93	-2.381	3.104e-12	-3.305	1.301e-15	-3.486	3.076e-18	-2.059	3.538e-10	-2.448	4.384e-06	-0.879958	0.3896	-1.1	0.1489	0.270238	0.6519	-0.1157	1	-0.181	1	1.231	0.04559	0.7887	0.4522	1.40277	0.01388	0.9346	0.4124	0.393348	0.8205
MVLG_07316	758.54	856.41	533.08	338.56	314.23	326.3	249.55	297.34	445.71	401.68	497.02	531.82	1000.36	748.18	-0.7267	0.009173	-1.228	5.262e-05	-1.492	1.205e-06	-0.8075	0.01605	0.2042	0.7534	-0.462801	0.3896	-0.7598	0.0504	-0.130331	0.7787	0.892602	0.1701	-0.2751	1	0.4046	0.4006	1.368	0.01262	0.689202	0.1203	1.636	0.0009534	-0.98833	0.03174
MVLG_06259	21.01	20.41	47.94	53.03	36.58	37.28	32.3	35.56	48.85	45.99	47.02	16.15	38.11	36.45	1.42	4.021e-07	0.9136	0.004415	0.7394	0.02066	1.04	0.002964	0.7946	0.108	-0.472523	0.3914	-0.6799	0.09339	-0.435583	0.2832	-0.665644	0.2987	-0.1848	1	0.1095	0.8667	-0.1824	0.8655	0.304707	0.5704	-0.004006	0.9598	0.270724	0.6134
MVLG_04007	10.81	10.17	27.86	29.05	41.56	42.12	53.45	32.92	42.57	42.05	43.76	51.89	36.61	29.93	1.577	1.761e-06	2.078	9.043e-10	2.104	6.8e-11	1.9	7.765e-08	1.858	3.623e-05	0.533189	0.3965	0.5289	0.293	0.26753	0.607	0.234858	0.9304	0.009827	1	-0.195	0.7206	-0.275	0.8856	-0.185774	0.7524	-0.2735	0.8438	0.0455623	1
MVLG_06812	16.57	11.1	33.89	46.54	88.68	33.98	76.29	59	30.72	44.55	41.29	25.88	29.99	34.14	1.689	4.787e-07	2.214	1.207e-10	2.354	3.393e-13	1.42	6.892e-05	1.301	0.01081	0.554062	0.3973	0.6653	0.1544	-0.330728	0.4667	-0.429797	0.8021	0.1306	1	-0.8132	0.06059	-0.9645	0.208	-0.927918	0.02134	-1.09	0.07667	0.124106	0.9051
MVLG_05702	46.36	38.32	24.91	15.62	14.68	9.47	13.46	10.65	22.4	34.39	29.53	11.23	34.2	15.64	-0.921	0.008525	-1.732	2.871e-05	-1.736	2.001e-06	-0.6362	0.0639	-0.6749	0.1129	-0.769616	0.3977	-0.8068	0.1585	0.226675	0.719	0.205714	1	-0.01769	1	1.074	0.0527	0.983	0.437	1.10689	0.02264	1.009	0.2636	0.058101	0.8978
MVLG_05986	80.14	74.12	19.83	4.49	27.49	13.87	18.91	17.97	19.51	21.82	18.87	65.79	12.44	18.08	-2.528	2.827e-13	-1.83	2.916e-07	-2.022	3.435e-09	-2.046	2.8e-10	-1.898	0.0008598	0.727607	0.3977	0.5089	0.4857	0.428474	0.439	0.574272	0.5886	-0.2001	1	-0.2336	0.7226	-0.1105	0.9892	-0.0207496	0.9693	0.09471	0.8085	-0.177067	0.6488
MVLG_02273	68.39	48.08	113.58	114.82	192.08	133.41	240.69	212.46	186.57	232.54	171.56	102.21	91.34	89.37	1.126	0.000158	1.57	4.721e-07	2.025	3.22e-11	1.708	9.423e-07	0.811	0.08389	0.475814	0.3982	0.9014	0.01556	0.524104	0.2176	-0.356181	0.8312	0.4454	0.8954	0.1189	0.8506	-0.8126	0.2686	-0.312612	0.5139	-1.257	0.01942	0.90678	0.07903
MVLG_02928	188.5	204.28	68.78	45.9	73.02	97.87	42.04	88.25	38.79	86.38	73.95	112.91	48.43	38.03	-1.63	1.445e-07	-1.102	0.0009137	-1.614	1.837e-06	-1.572	8.445e-07	-1.813	0.0002348	0.562957	0.3982	0.01536	0.9581	-0.0024388	0.9785	-0.229297	1	-0.5156	0.9491	-0.4954	0.286	-0.7647	0.5365	0.011557	0.9594	-0.277	0.885	0.227489	0.9345
MVLG_05055	43.44	37.19	81.14	71.06	148.96	83.16	135.74	106.92	145.57	110.07	81.61	60.53	23.48	63.38	1.074	0.001953	1.608	4.711e-06	1.677	2.951e-07	1.448	3.889e-05	0.2739	0.6083	0.565219	0.3982	0.6047	0.2246	0.32153	0.5209	-0.843303	0.5264	0.05702	1	-0.1751	0.7808	-1.378	0.1046	-0.212822	0.7183	-1.429	0.04155	1.17486	0.07188
MVLG_05054	52.73	48.94	5.98	2.96	7.1	9.95	13.64	8.13	38.69	69.04	39.38	7.21	14.08	16.76	-3.373	1.035e-18	-2.489	7.668e-11	-2.125	2.594e-10	-0.1687	0.6496	-1.716	8.327e-05	0.907448	0.3987	1.243	0.05558	3.14278	1.786e-11	1.59519	0.1059	0.3428	1	2.294	8.221e-07	0.7019	0.6893	1.97208	1.876e-06	0.3802	0.8019	1.56115	0.001381
MVLG_06903	152.97	130.14	828.9	1028.71	560.12	844.08	426.41	615.74	313.84	178.07	191.11	689.32	620.92	622.21	2.864	2.505e-26	2.424	5.159e-17	1.939	6.124e-11	0.6069	0.09202	2.295	9.989e-09	-0.403171	0.3991	-0.9233	0.00539	-2.30654	1.407e-12	-0.60773	0.3773	-0.4969	0.7637	-1.83	9.941e-08	-0.1817	0.8913	-1.32215	0.0002309	0.3069	0.7065	-1.67292	3.758e-05
MVLG_06872	91.4	77.09	126.49	124.9	88.11	97.93	67.05	78.37	49.12	41.04	48.17	99.7	78.89	83.84	0.7187	0.01001	0.2328	0.4914	-0.1765	0.6313	-0.9936	0.002846	0.09387	0.867	-0.45019	0.3994	-0.8926	0.01415	-1.76554	2.248e-07	-0.665865	0.4048	-0.4196	0.9335	-1.242	0.001052	-0.1935	0.9122	-0.813283	0.0451	0.2204	0.8286	-1.07942	0.02053
MVLG_01550	8.96	11.66	9.79	9.68	7.17	4.18	14.65	7.96	67.16	218.67	106.36	19.66	17.59	11.88	0.04517	0.9389	-0.7977	0.117	0.2284	0.6336	3.544	1.327e-21	0.6623	0.2094	-0.802289	0.4014	0.1854	0.8905	3.43014	1.154e-16	0.566908	0.7283	1.002	0.5727	4.314	2.582e-20	1.386	0.1287	3.32904	4.885e-16	0.4107	0.6524	2.89233	5.294e-10
MVLG_04880	280.03	176.05	811.79	1010.18	1272.23	1162.18	1202.29	1073.15	798.61	941.13	915.3	856.97	814	783.07	2.153	2.177e-16	2.512	1.12e-18	2.378	9.163e-16	1.883	5.466e-08	1.938	8.346e-07	0.392864	0.4014	0.2267	0.6161	-0.327902	0.4137	-0.251101	0.8659	-0.1454	1	-0.6479	0.09424	-0.6238	0.3376	-0.490279	0.2478	-0.481	0.4385	-0.0462255	0.9664
MVLG_05883	7.78	7.04	14.89	17	22.62	30.04	19.4	24.6	28.75	38.09	33.13	26	31.94	34.29	1.247	0.005	1.921	9.769e-06	1.576	3.563e-05	2.086	8.978e-09	2.242	8.076e-06	0.702974	0.4014	0.3263	0.6717	0.779158	0.1329	0.943985	0.4052	-0.3537	1	0.143	0.8635	0.2569	0.9371	0.501254	0.3986	0.5989	0.5756	-0.146541	0.9055
MVLG_04581	42.19	34.59	119.37	101.51	84.83	80.61	15.09	33.94	35.85	38.87	42.13	39.19	71.73	118.01	1.664	9.811e-10	1.191	8.701e-05	-0.6831	0.06477	-0.1019	0.7942	1.22	0.005058	-0.437156	0.4028	-2.345	2.155e-11	-1.82048	6.794e-08	-0.481064	0.5156	-1.872	0.0001081	-1.311	0.0004269	-0.03156	0.9799	0.555987	0.3045	1.807	0.0008641	-1.30074	0.004391
MVLG_03974	160.69	148.31	12.11	18.56	30.89	20.31	42.05	31.29	53.45	65.04	51.06	45.37	36.94	17.23	-3.191	3.191e-22	-2.519	9.782e-14	-2.01	1.915e-10	-1.556	1.3e-06	-2.27	2.756e-07	0.699894	0.4041	1.178	0.01462	1.57509	0.0003529	0.868966	0.3963	0.4938	0.9491	0.944	0.04843	0.1895	0.937	0.466501	0.35	-0.2957	0.8347	0.72297	0.2819
MVLG_04790	3800.95	2933.22	758.38	1059.56	855.64	1521.33	624.64	1259.74	1076.23	1319.28	1259.02	1586.83	504.06	889.52	-1.732	3.676e-11	-1.37	1.201e-06	-1.763	2.313e-09	-1.469	4.339e-06	-1.747	3.213e-06	0.39857	0.4041	-0.03068	0.9878	0.20351	0.6557	-0.0540788	1	-0.4048	0.9014	-0.1176	0.8202	-0.419	0.6519	0.29318	0.564	-0.02433	1	0.276436	0.7141
MVLG_04917	188.9	215.51	65.57	88.59	43.87	61.31	12.9	42.5	51	62.36	56.34	18.43	32.75	40.65	-1.252	2.146e-05	-1.849	2.745e-08	-3.001	1.714e-16	-1.903	2.908e-09	-2.398	2.233e-08	-0.561878	0.4047	-1.752	0.0001297	-0.710673	0.07927	-1.18826	0.05814	-1.147	0.3512	-0.07517	0.9027	-0.6115	0.5389	1.05169	0.04758	0.4774	0.8333	0.509486	0.4273
MVLG_00617	79.25	72.06	54.18	61.32	37.64	40.84	30.61	52.07	18.05	19.91	18.11	43.32	51.33	73.88	-0.2464	0.4665	-0.8575	0.01695	-0.8804	0.01314	-2.097	1.459e-10	-0.2208	0.6344	-0.575567	0.4056	-0.6347	0.2172	-1.9096	4.25e-07	-0.0180247	1	-0.02824	1	-1.26	0.005607	0.5732	0.6519	-1.23435	0.002797	0.5804	0.5514	-1.86341	9.852e-05
MVLG_02332	1582.54	1273.94	37.16	48.04	79.13	88.63	228.63	217.74	1696.38	363.98	816.82	1889.4	293.85	57.74	-4.898	3.865e-39	-3.947	2.274e-26	-2.539	2.714e-15	-0.4	0.2736	-1.59	0.002778	0.970622	0.4061	2.346	7.064e-06	4.45796	1.659e-21	3.2217	2.873e-08	1.388	0.09291	3.54	6.021e-15	2.317	6.57e-05	2.16593	4.966e-08	0.947	0.07611	1.12906	0.1064
MVLG_04248	534.67	612.92	971.86	1239.74	2110.49	950.14	2317.58	1693.16	1251.77	2254.11	1423.48	1137.36	1044.69	805.98	1.102	5.259e-05	1.498	2.52e-07	1.927	7.517e-11	1.728	5.91e-07	1.073	0.01019	0.424237	0.4062	0.825	0.01732	0.563559	0.1581	-0.0701945	0.9984	0.4201	0.8893	0.2089	0.6836	-0.4801	0.5286	-0.195119	0.7001	-0.8972	0.08323	0.671808	0.1704
MVLG_02271	19.65	12.51	152.68	172.53	208.91	241.97	188.79	162.28	58.76	81.65	60.91	77.77	95.77	116.79	3.497	3.093e-29	3.921	3.973e-32	3.526	1.516e-26	2.059	1.291e-08	2.853	8.747e-10	0.458007	0.4103	0.03069	1	-1.49944	2.909e-05	-0.683994	0.3814	-0.4086	0.9282	-1.885	2.31e-07	-1.125	0.05136	-1.46416	7.575e-05	-0.7168	0.244	-0.783338	0.1785
MVLG_00943	56.04	82.17	37.79	40	29.99	17.69	22.69	14.55	32.5	37.36	48.37	42.75	43.22	33.61	-0.6942	0.05354	-1.467	0.0004471	-1.776	1.603e-06	-0.8561	0.01146	-0.6635	0.2043	-0.734957	0.4117	-1.074	0.04806	-0.219144	0.6751	-0.0165931	1	-0.322	1	0.5946	0.3575	0.735	0.5749	0.938782	0.06873	1.074	0.1752	-0.182939	0.8565
MVLG_01069	18.38	16.19	30.19	50.41	28.64	20.58	26.69	31.99	62.5	55.74	61.55	0	25.27	21.35	1.368	0.0004336	0.5957	0.2567	0.7875	0.04894	1.738	1.187e-06	0.5216	0.7905	-0.735151	0.4117	-0.5802	0.4176	0.31191	0.57	-0.883989	0.2436	0.182	1	1.125	0.03877	-0.1364	0.9059	0.948712	0.05734	-0.3296	0.5832	1.23615	0.006286
MVLG_01205	44.63	33.8	104.61	79.91	71.87	65.82	83.44	84.47	49.4	75.46	73.98	22.15	75.19	88.55	1.375	5.365e-07	0.8956	0.003873	1.14	0.0001821	0.6439	0.07603	0.9468	0.0424	-0.442699	0.4117	-0.2303	0.6438	-0.788118	0.03162	-0.463864	0.5097	0.2332	1	-0.2721	0.5688	-0.01209	0.9734	-0.49516	0.2542	-0.2492	0.6599	-0.278326	0.7905
MVLG_01584	3467.79	4633.75	51.87	0	29.2	87.7	37.51	56.71	327.89	517.16	567.19	211.78	186.91	63.74	-7.068	6.748e-76	-5.967	4.673e-56	-6.414	4.489e-61	-2.935	2.875e-20	-4.527	4.917e-27	1.11706	0.4125	0.6466	0.4906	4.07594	3.93e-17	2.46464	0.002395	-0.4543	1	3.008	1.643e-10	1.357	0.1412	3.4664	5.64e-14	1.799	0.01465	1.60688	0.001236
MVLG_02812	55.33	37.37	96.55	99.78	80.65	70.41	70.2	72.66	67.8	58.21	61.67	66.17	74.93	86.15	1.225	3.441e-06	0.7856	0.00761	0.663	0.02947	0.2749	0.4758	0.7938	0.06064	-0.404757	0.4126	-0.5585	0.1347	-1.00289	0.003914	-0.467962	0.574	-0.1325	1	-0.5267	0.2009	-0.04571	0.992	-0.380962	0.4028	0.08404	0.9724	-0.505162	0.3635
MVLG_00114	285.14	266.88	12.49	4.25	25.3	13.41	16.11	13.28	96.39	118.02	84	52.33	6.9	12.39	-4.883	1.824e-32	-3.751	4.542e-21	-4.134	3.481e-27	-1.496	3.612e-06	-4.415	5.226e-13	1.14013	0.4152	0.7393	0.518	3.3281	4.092e-10	NA	NA	-0.3913	1	2.235	1.279e-05	NA	NA	2.64613	2.072e-08	-0.305	1	2.9059	0.0001434
MVLG_00471	392.06	383.92	9.74	84.21	34.16	6.33	85.91	47.81	685.92	305.71	363.39	329.12	51.65	46.91	-2.92	3.075e-15	-4.179	1.029e-18	-2.331	1.579e-11	0.3293	0.3802	-2.194	0.0002299	-1.20051	0.4152	0.5847	0.5424	3.19867	1.083e-12	0.661106	0.6423	1.806	0.1736	4.497	1.732e-16	1.893	0.04215	2.69839	1.062e-10	0.1326	0.7455	2.50847	7.005e-05
MVLG_02659	5.63	4.71	13.25	8.45	4.82	4.64	15.93	11.42	12.65	28.15	24.39	0	34.98	25.78	1.213	0.02685	-0.04157	1	1.5	0.0009052	2.052	4.207e-08	2.577	7.924e-06	-1.19238	0.4152	0.288	0.8651	0.776106	0.2115	1.31013	0.4214	1.503	0.4207	2.065	0.003551	2.501	0.01778	0.557454	0.3635	1.029	0.4026	-0.514077	0.7999
MVLG_03099	92.02	131.68	14.44	22.02	16.67	37.76	16.47	30.2	61.76	50.47	76.08	58.07	36.2	45.9	-2.489	3.147e-16	-1.948	1.168e-09	-2.291	2.89e-12	-0.9826	0.00294	-1.295	0.002422	0.573272	0.4152	0.1923	0.7416	1.4514	0.0003411	1.14086	0.07836	-0.3515	1	0.9486	0.03161	0.5907	0.4934	1.29649	0.002451	0.9197	0.1727	0.317102	0.7049
MVLG_05592	5.74	6.84	4.86	9.66	5.36	1.04	4.43	3.4	28.72	34.9	22.79	9.83	12.62	16.29	0.3411	0.5677	-0.9167	0.2248	-0.6014	0.2868	2.073	9.598e-09	1.238	0.03372	-1.19862	0.4152	-0.9311	0.286	1.67085	0.0007813	0.838581	0.6366	0.2958	1	2.969	6.625e-07	2.049	0.0514	2.68323	8.867e-08	1.778	0.04629	0.84619	0.1919
MVLG_06526	241.32	252.78	21.91	15.86	27.58	33.9	3.33	11.54	3.72	2.52	2.78	89.64	33.24	16.74	-3.569	3.358e-27	-2.918	1.159e-17	-5.294	4.43e-37	-6.536	6.42e-63	-2.842	3.475e-09	0.682078	0.4152	-1.71	0.02649	-3.02234	3.927e-08	0.672912	0.5335	-2.357	0.005634	-3.634	4.444e-12	0.02066	0.9664	-1.27482	0.08276	2.329	0.001779	-3.68456	6.49e-11
MVLG_03211	109.58	128.38	65.3	47.5	42.69	33.92	54.45	41.04	46.5	80.7	68.6	102.78	81.32	124.59	-0.9386	0.002524	-1.558	9.814e-06	-1.249	0.0001173	-0.9226	0.005287	-0.09593	0.8675	-0.582485	0.4158	-0.3055	0.5926	-0.0429341	0.9197	0.797132	0.3406	0.294	1	0.6139	0.2508	1.399	0.03724	0.334753	0.546	1.115	0.06671	-0.820125	0.1161
MVLG_03578	109.54	107.05	286.16	312.43	225.07	222.63	160.04	165.08	96.29	74.59	84.49	107.68	200.34	209.38	1.614	3.816e-09	1.142	0.000202	0.643	0.0445	-0.406	0.2685	0.9362	0.04335	-0.438382	0.4158	-0.9696	0.006718	-2.07366	1.029e-09	-0.717569	0.2366	-0.5097	0.8227	-1.563	2.526e-05	-0.2682	0.7528	-1.04069	0.007888	0.2369	0.8774	-1.31454	0.005289
MVLG_05696	0.11	0.04	59.16	60.91	92.69	78.38	82.7	92.68	33.34	58.17	52.09	11.82	94.33	92.57	9.667	2.358e-51	10.12	8.696e-54	10.11	5.107e-62	9.152	2.321e-51	10.03	8.828e-28	0.482674	0.4158	0.4451	0.3301	-0.607589	0.1295	0.358745	0.9331	-0.0154	1	-1.018	0.009691	-0.1177	0.8584	-0.994333	0.009794	-0.109	0.8019	-0.918117	0.1075
MVLG_00845	9.68	8.09	15.21	26.58	14.37	13	20.48	19.73	29.94	29.31	31.32	0	16.35	17.98	1.376	0.0001178	0.7043	0.1225	1.218	0.0006675	1.641	3.782e-06	0.9131	0.2567	-0.636415	0.4164	-0.1591	0.8405	0.206367	0.7185	-0.504531	0.444	0.4997	0.9652	0.9191	0.07811	0.143	1	0.429244	0.4338	-0.3575	0.4685	0.748719	0.06813
MVLG_01121	1551.92	1487.19	33.4	154.43	100.31	192.26	211.61	291.34	1955.43	358.75	1145.76	2574.67	456.85	184.36	-3.881	1.252e-33	-3.229	2.852e-22	-2.515	2.263e-15	-0.3005	0.4173	-0.8761	0.09823	0.679399	0.4164	1.358	0.001933	3.53625	9.676e-18	2.94183	3.202e-09	0.7013	0.6801	2.922	1.71e-12	2.32	6.181e-06	2.22934	1.486e-08	1.616	0.001132	0.531254	0.5328
MVLG_06184	164.7	191.5	48.67	43.39	60.19	81	76.62	77.56	151.89	112.99	129.92	101.82	119.48	57.45	-1.807	2.929e-08	-1.236	0.0003468	-1.155	0.000436	-0.492	0.1681	-0.7881	0.07435	0.602724	0.4164	0.6509	0.2342	1.26349	0.003266	0.970947	0.29	0.06701	1	0.7283	0.1321	0.3819	0.7877	0.673035	0.1512	0.3126	0.7921	0.316506	0.6604
MVLG_06905	173.32	151.08	59.72	74.98	91.91	114.03	100.4	77.73	79.2	36.39	30.9	198.75	12.68	19.04	-1.111	0.0008437	-0.5438	0.1384	-0.7664	0.02137	-1.821	7.675e-08	-2.403	0.000712	0.599318	0.4164	0.346	0.6177	-0.75926	0.1235	-1.33528	0.5886	-0.2382	1	-1.289	0.00529	-1.883	0.1571	-1.02905	0.02385	-1.635	0.2234	0.558997	0.9384
MVLG_03056	183.17	178.48	70.75	65.81	67.04	35.63	76.14	50.6	99.31	105.48	121.33	51.08	149.74	102.62	-1.27	3.574e-06	-1.755	6.09e-09	-1.466	9.72e-07	-0.8681	0.009016	-0.6318	0.08462	-0.452962	0.4166	-0.193	0.7026	0.346928	0.4325	0.598996	0.5491	0.278	1	0.872	0.03742	1.061	0.09758	0.611511	0.1636	0.7878	0.2254	-0.210397	0.8426
MVLG_04919	23.47	18.68	41.17	38.72	71.47	41.55	82.43	49.59	32.34	46.8	44.27	52.43	45.81	42.39	1.062	0.0002598	1.489	1.147e-06	1.694	2.476e-08	0.8403	0.01831	1.184	0.005898	0.459495	0.4166	0.6354	0.1173	-0.279842	0.5187	0.0811326	1	0.1929	1	-0.6682	0.103	-0.3578	0.7528	-0.84437	0.03149	-0.5435	0.4527	-0.338951	0.6009
MVLG_06322	71	76.5	26.68	31.68	14.72	18.17	12.87	26.55	31.19	19.83	18.39	19.45	41.01	33.22	-1.196	0.0007535	-2.074	1.214e-06	-1.991	4.567e-07	-1.801	9.97e-08	-0.884	0.05186	-0.836936	0.4166	-0.7953	0.313	-0.660094	0.2251	0.264889	0.9891	0.07757	1	0.2565	0.7577	1.111	0.342	0.171003	0.8782	1.003	0.3276	-0.88285	0.221
MVLG_01617	1802.46	1491.58	1385.97	1216.46	1280.16	749.16	1036.33	1020.19	551.96	425.14	382.27	890.68	502.62	398.55	-0.1645	0.5843	-0.601	0.04447	-0.5746	0.06174	-1.762	3.482e-08	-1.392	0.0005366	-0.403257	0.4168	-0.4056	0.32	-1.64792	7.436e-07	-1.26699	0.01112	0.01796	1	-1.176	0.001315	-0.8389	0.2115	-1.17743	0.001314	-0.8557	0.1477	-0.366409	0.5347
MVLG_02274	48.67	59.26	336.06	255.56	301.17	486.44	187.21	491.19	59.83	43.63	74.97	24.78	87.1	262.75	2.598	2.14e-20	2.975	9.111e-23	2.69	3.105e-18	0.08805	0.8479	1.643	0.000324	0.416685	0.4192	0.09582	0.8496	-2.55972	5.755e-14	-0.993834	0.03581	-0.294	0.9868	-2.901	1.521e-16	-1.396	0.001886	-2.60545	1.226e-13	-1.119	0.01245	-1.52847	0.001606
MVLG_03179	67.05	40.51	422.36	490.49	320.98	386.31	181.67	287.9	194.91	163.13	203.07	384.5	325.75	318.66	3.233	5.078e-33	2.815	1.417e-22	2.176	1.85e-13	1.66	1.539e-06	2.718	1.1e-11	-0.381649	0.4209	-1.053	0.0009207	-1.62676	6.216e-07	-0.549508	0.45	-0.6486	0.483	-1.171	0.0009532	-0.1443	0.93	-0.512184	0.2249	0.4971	0.4494	-1.0518	0.01333
MVLG_01029	28.04	26.1	66.13	65.03	53.47	39.42	60.29	32.32	46.51	37.91	42.94	0	71.64	77.67	1.418	3.984e-06	0.8569	0.0197	0.8686	0.0119	0.5441	0.1436	1.388	0.008504	-0.526693	0.4228	-0.5448	0.2089	-0.927919	0.01862	-0.0697741	0.8744	-0.005139	1	-0.3278	0.5444	0.4634	0.9064	-0.298277	0.6064	0.4839	0.7723	-0.809958	0.3214
MVLG_02235	2976.62	4234	821.38	713.86	968.76	1046.18	850.64	983.93	475.24	699.02	649.54	1298.53	931.41	1224.41	-2.103	7.424e-16	-1.761	3.131e-10	-1.937	3.676e-11	-2.68	2.572e-17	-1.592	9.387e-06	0.378454	0.4248	0.1686	0.7274	-0.634052	0.0815	0.47239	0.5852	-0.1889	1	-0.9378	0.0101	0.1177	0.952	-0.738795	0.05687	0.3019	0.6932	-1.07533	0.01026
MVLG_06391	9.05	5.4	21.78	25.29	43.72	22.83	38.24	27.75	29.06	39.5	29.88	7.24	21.33	27.1	1.849	2.753e-10	2.272	2.783e-13	2.24	4.838e-13	2.045	6.252e-09	1.657	0.0002636	0.452846	0.4254	0.3927	0.4102	0.135705	0.7996	-0.230795	0.8312	-0.04146	1	-0.2466	0.616	-0.6736	0.2787	-0.188085	0.7217	-0.6288	0.2473	0.410808	0.4048
MVLG_03370	48.85	33.77	101.55	97.36	53	97.72	42.38	77.59	23.05	21.62	40.89	46.23	87.14	96.32	1.408	7.99e-08	0.9732	0.0007971	0.5757	0.05906	-0.6801	0.04541	1.022	0.01404	-0.394948	0.426	-0.8282	0.01639	-2.14168	4.834e-11	-0.422962	0.6014	-0.4088	0.9064	-1.669	1.462e-06	-0.01056	1	-1.2563	0.0004903	0.3864	0.6482	-1.68713	3.719e-05
MVLG_04864	37.1	32.17	85.81	80.22	58.09	65.25	42	43.83	59.9	27.77	32.98	84.39	64.87	96.38	1.4	5.268e-07	0.9201	0.00375	0.3447	0.3134	0.04279	0.9094	1.31	0.001829	-0.444146	0.426	-1.052	0.00399	-1.40337	7.937e-05	-0.131394	0.9812	-0.5865	0.7189	-0.8883	0.03233	0.3337	0.7779	-0.287488	0.588	0.9164	0.1374	-1.24851	0.006246
MVLG_02526	163.01	111.67	455.9	461.09	352.02	354.53	285.47	296.81	213.46	199.69	244.54	388.85	355.47	386.48	1.89	7.359e-13	1.459	3.693e-07	1.139	0.0001337	0.5869	0.1053	1.552	0.0001002	-0.395038	0.4262	-0.7473	0.03167	-1.35691	5.168e-05	-0.374648	0.7283	-0.3311	0.9737	-0.8887	0.01812	0.04097	1	-0.54611	0.1941	0.3686	0.6303	-0.955867	0.03229
MVLG_06422	2.86	2.52	24.05	50.26	26.17	23.86	21.43	21.85	8.64	26.81	14.35	0	44.98	25.15	3.927	4.96e-24	3.297	1.289e-11	3.041	7.498e-14	2.623	1.179e-11	3.712	7.251e-12	-0.596267	0.4276	-0.8857	0.08091	-1.37615	0.000487	-0.254474	0.7091	-0.266	1	-0.7047	0.1583	0.3465	1	-0.43085	0.3799	0.6072	0.7659	-1.07895	0.1469
MVLG_00145	169.01	125.01	489.17	449.06	384.41	338.41	228.16	345.73	269.75	225.66	206.24	520.53	478.41	547.8	1.828	7.143e-12	1.392	1.928e-06	1.02	0.0007196	0.6067	0.09304	1.936	1.337e-06	-0.400374	0.4304	-0.8037	0.02348	-1.27311	0.000188	0.0707918	1	-0.3795	0.9491	-0.8017	0.0393	0.4906	0.5552	-0.411512	0.3615	0.8623	0.1337	-1.31572	0.001853
MVLG_00665	4.1	4.3	5.31	15.9	19.75	17.71	17.42	21.2	21.46	17.45	19.8	25.94	12.75	8.15	1.473	0.008081	2.234	7.441e-06	2.205	4.306e-08	2.099	1.853e-08	1.611	0.01013	0.784492	0.4305	0.7238	0.3227	0.566366	0.3533	0.0871211	1	-0.03821	1	-0.1518	0.8412	-0.6741	0.7428	-0.107814	0.8648	-0.648	0.6615	0.494328	0.7195
MVLG_04692	12.03	8.09	170.08	161.29	184.38	257.23	96.8	198.2	18.08	28.54	50.78	119.2	118.88	199.44	4.189	6.224e-44	4.561	1.925e-44	3.91	1.36e-32	1.643	5.022e-06	4.019	3.319e-19	0.409176	0.4305	-0.2767	0.5954	-2.60424	9.809e-15	-0.208472	0.896	-0.659	0.5484	-2.938	3.068e-17	-0.5988	0.3866	-2.27881	7.622e-11	0.04509	1	-2.37407	9.582e-09
MVLG_01070	118.87	156.34	112.16	105.37	165.15	147.83	183.52	211.29	417.64	572.36	304.12	90.79	146.75	218.31	-0.1949	0.578	0.2722	0.4497	0.5727	0.07452	1.633	2.416e-06	0.4773	0.3978	0.499628	0.4318	0.7675	0.06496	1.76961	3.736e-06	0.627664	0.5991	0.2897	0.9938	1.34	0.00093	0.1414	0.9994	1.06049	0.009325	-0.1536	0.8304	1.18169	0.006003
MVLG_07348	14.3	16.02	67.18	66.79	32.49	38.48	33.96	60.42	42.15	79.35	57.7	0	84.68	108.71	2.305	6.394e-06	1.347	0.0625	1.616	0.001163	2.197	1.025e-08	2.902	1.378e-06	-0.91084	0.4318	-0.6855	0.4541	-0.171772	0.7515	0.548185	0.9635	0.2582	1	0.8219	0.3061	1.467	0.2599	0.555479	0.5123	1.192	0.3787	-0.699206	0.5985
[truncated: 2,308 more rows]
