# Supplementary material for: Pas de deux: An Intricate Dance of Anther Smut and Its Host
Source: Oxford University Press journal article supplement (doi:10.1534/g3.117.300318), 2017-12-02
Supplement: 300318_tables5.xlsx [file 300318_tables5.xlsx]

## Sheet: FungalGSEA
Name of Geneset	Size	Magnitude of NES	FDR q-val
FILatevFI7
SMALL SECRETED PROTEIN	20	-2.33709	0
PF03169.8|OPT[OPT OLIGOPEPTIDE TRANSPORTER PROTEIN]	9	-1.90549	0.011988
SECRETED PROTEIN	40	-1.84467	0.0161081
FILatevFI9
SMALL SECRETED PROTEIN	18	-2.25065	0.00187735
SECRETED PROTEIN	43	-1.89959	0.0235187
PF03169.8|OPT[OPT OLIGOPEPTIDE TRANSPORTER PROTEIN]	7	-1.80939	0.0427435
FILatevFI10
SMALL SECRETED PROTEIN	17	-2.80677	0
FILatevFIFS
SECRETED PROTEIN	44	-1.7376	0.0512261
SMALL SECRETED PROTEIN	18	-1.7176	0.0311769
PF07690.9|MFS_1[MAJOR FACILITATOR SUPERFAMILY]	15	-1.6489	0.0358756
FILatevMated
PF07859.6|ABHYDROLASE_3[ALPHA/BETA HYDROLASE FOLD]	9	-2.0219	0.032749
FI7vMated
SMALL SECRETED PROTEIN	30	2.93286	0
UNIQUE TO MVIO	218	2.22658	0.000568317
GO:0003735	30	2.00789	0.00493845
GO:0006412	30	2.00672	0.00397769
FI9vMated
SMALL SECRETED PROTEIN	33	3.11019	0
UNIQUE TO MVIO	279	2.29255	0.000645215
GO:0003735	36	2.22565	0.000430143
GO:0006412	36	2.20706	0.000965328
GO:0005840	30	2.06127	0.00352502
SECRETED PROTEIN	89	1.92182	0.0212953
PF00295.10|GLYCO_HYDRO_28[GLYCOSYL HYDROLASES FAMILY 28]	4	1.84456	0.0447162
PF06723.6|MREB_MBL[MREB/MBL PROTEIN]	7	1.82442	0.046637
PF00012.13|HSP70[HSP70 PROTEIN]	7	1.79046	0.056968
FI10vMated
SMALL SECRETED PROTEIN	35	3.08736	0
GO:0003735	49	2.47526	0
GO:0006412	47	2.38048	0
GO:0005840	39	2.28658	0
UNIQUE TO MVIO	300	2.21395	0.000255476
SECRETED PROTEIN	97	1.9351	0.0249584
PF06723.6|MREB_MBL[MREB/MBL PROTEIN]	7	1.87104	0.0406444
PF00012.13|HSP70[HSP70 PROTEIN]	7	1.86431	0.0385416
GO:0006334	10	1.8606	0.0357296
PF00295.10|GLYCO_HYDRO_28[GLYCOSYL HYDROLASES FAMILY 28]	4	1.83611	0.0407569
GO:0006281	8	1.83077	0.0391134
GO:0000786	10	1.79707	0.0514564
FIFSvMated
SMALL SECRETED PROTEIN	24	2.46484	0
UNIQUE TO MVIO	126	2.24562	0
FILatevMated
SMALL SECRETED PROTEIN	38	2.59024	0
UNIQUE TO MVIO	418	2.10137	0.00125986
GO:0003735	52	1.95202	0.0155664
GO:0006412	51	1.94279	0.0132609
GO:0005840	42	1.84173	0.0468185
MI9vMated
PF05686.5|DUF821[ARABIDOPSIS THALIANA PROTEIN OF UNKNOWN FUNCTION (DUF821)]	8	-1.94166	0.0391696
MI10vMI8
SMALL SECRETED PROTEIN	23	-1.97721	0.0191694
MI8vMated
SMALL SECRETED PROTEIN	40	3.10234	0
GO:0006412	54	2.49961	0
GO:0003735	56	2.49879	0
GO:0005840	46	2.40635	0
UNIQUE TO MVIO	424	1.99009	0.0183873
PF06723.6|MREB_MBL[MREB/MBL PROTEIN]	7	1.93301	0.0289084
PF00012.13|HSP70[HSP70 PROTEIN]	7	1.91404	0.0310986
PF01095.12|PECTINESTERASE[PECTINESTERASE]	4	1.88791	0.0375315
PF00295.10|GLYCO_HYDRO_28[GLYCOSYL HYDROLASES FAMILY 28]	4	1.8758	0.0380963
MI9vMated
SMALL SECRETED PROTEIN	38	2.96042	0
GO:0003735	66	2.63493	0
GO:0006412	66	2.59543	0
GO:0005840	53	2.39138	0.000324849
UNIQUE TO MVIO	403	2.09159	0.00416544
PF00012.13|HSP70[HSP70 PROTEIN]	7	2.04782	0.00628916
PF06723.6|MREB_MBL[MREB/MBL PROTEIN]	7	1.99616	0.00947128
GO:0006281	10	1.96693	0.0125048
GO:0000786	14	1.90605	0.0252051
GO:0006334	14	1.88846	0.0283404
PF00125.17|HISTONE[CORE HISTONE H2A/H2B/H3/H4]	15	1.83627	0.0502603
MI10vMated
SMALL SECRETED PROTEIN	39	2.97704	0
GO:0006412	58	2.57279	0
GO:0003735	59	2.53014	0
GO:0005840	47	2.43528	0
GO:0006334	16	2.17391	0.00106957
GO:0000786	16	2.1231	0.00287012
PF06723.6|MREB_MBL[MREB/MBL PROTEIN]	7	2.09494	0.00301471
PF00125.17|HISTONE[CORE HISTONE H2A/H2B/H3/H4]	17	2.07315	0.00462948
GO:0006281	10	2.06412	0.00441282
UNIQUE TO MVIO	442	2.05457	0.00503014
GO:0005634	50	2.05181	0.00457286
PF00012.13|HSP70[HSP70 PROTEIN]	7	2.04831	0.0047509
GO:0003677	25	1.81724	0.0599335
MIFI8vMated
SMALL SECRETED PROTEIN	39	3.03759	0
GO:0006412	54	2.47413	0
GO:0003735	56	2.45642	0
GO:0005840	47	2.38837	0
UNIQUE TO MVIO	424	2.06433	0.00715587
PF00295.10|GLYCO_HYDRO_28[GLYCOSYL HYDROLASES FAMILY 28]	4	1.90142	0.0419718
PF06723.6|MREB_MBL[MREB/MBL PROTEIN]	7	1.87865	0.0494848
PF00012.13|HSP70[HSP70 PROTEIN]	7	1.86956	0.0480837
PF01095.12|PECTINESTERASE[PECTINESTERASE]	4	1.84781	0.054106
MIFI9vMated
PF05686.5|DUF821[ARABIDOPSIS THALIANA PROTEIN OF UNKNOWN FUNCTION (DUF821)]	8	-2.05354	0.0141836
PF00501.21|AMP-BINDING[AMP-BINDING ENZYME]	12	-1.95492	0.0255883
SMALL SECRETED PROTEIN	40	3.04154	0
GO:0006412	55	2.64918	0
GO:0003735	56	2.58661	0
GO:0005840	46	2.47405	0
UNIQUE TO MVIO	402	2.19726	0.00103056
PF00012.13|HSP70[HSP70 PROTEIN]	7	1.99572	0.0136033
PF06723.6|MREB_MBL[MREB/MBL PROTEIN]	7	1.97732	0.0133238
GO:0006281	9	1.87244	0.0470881
SECRETED PROTEIN	122	1.86314	0.0464391
MIFI10vMated
PF05686.5|DUF821[ARABIDOPSIS THALIANA PROTEIN OF UNKNOWN FUNCTION (DUF821)]	9	-1.96246	0.0406323
SMALL SECRETED PROTEIN	40	3.09873	0
GO:0003735	56	2.59819	0
GO:0006412	55	2.59813	0
GO:0005840	45	2.50946	0
UNIQUE TO MVIO	437	2.18234	0.00106746
GO:0006334	13	2.11565	0.0031148
GO:0000786	13	2.10356	0.00323217
PF00012.13|HSP70[HSP70 PROTEIN]	7	2.06325	0.00383301
GO:0005634	44	2.04496	0.00443532
GO:0006281	9	2.03996	0.00412184
PF06723.6|MREB_MBL[MREB/MBL PROTEIN]	7	2.03005	0.00458845
PF00125.17|HISTONE[CORE HISTONE H2A/H2B/H3/H4]	14	2.01773	0.00498609
GO:0003677	19	1.87951	0.0271298
MIFIFSvMIFI10
GO:0000786	4	-1.85332	0.105401
GO:0006334	4	-1.84567	0.0558157
PF00125.17|HISTONE[CORE HISTONE H2A/H2B/H3/H4]	4	-1.83611	0.0399207
GO:0003677	4	-1.82751	0.0334928
GO:0005634	4	-1.79248	0.0322935
GO:0005737	4	-1.71105	0.054178
MIFILatevMated
PF00501.21|AMP-BINDING[AMP-BINDING ENZYME]	9	-2.14611	0.0121646
SMALL SECRETED PROTEIN	39	2.69478	0
UNIQUE TO MVIO	400	2.04647	0.00366924
GO:0006412	36	1.87723	0.0321419
GO:0003735	36	1.83113	0.0437666
MIFILatevMIFI8
SMALL SECRETED PROTEIN	34	-3.6497	0
KO04141[PROTEIN PROCESSING IN ENDOPLASMIC RETICULUM]	8	-2.24989	0.00519567
PF01095.12|PECTINESTERASE[PECTINESTERASE]	4	-1.98501	0.0390156
MIFILatevMIFI9
SMALL SECRETED PROTEIN	33	-3.56879	0
PF01095.12|PECTINESTERASE[PECTINESTERASE]	4	-2.04609	0.0261609
MIFILatevMIFI10
SMALL SECRETED PROTEIN	29	-3.45273	0
GO:0003677	8	-2.19242	0.00711906
GO:0005737	9	-2.12462	0.00652711
GO:0006334	6	-2.05556	0.00952492
GO:0000786	6	-1.97633	0.0139194
PF00125.17|HISTONE[CORE HISTONE H2A/H2B/H3/H4]	6	-1.97261	0.011777
MIFILatevMIFIFS
SMALL SECRETED PROTEIN	26	-2.36533	0
SECRETED PROTEIN	68	-1.89433	0.0110315
PF00295.10|GLYCO_HYDRO_28[GLYCOSYL HYDROLASES FAMILY 28]	4	-1.77923	0.0291721
PF03169.8|OPT[OPT OLIGOPEPTIDE TRANSPORTER PROTEIN]	8	-1.74587	0.0309005
MI10vFI10
UNIQUE TO MVIO	3	-1.50577	0.0844535
