# Supplementary material for: Pas de deux: An Intricate Dance of Anther Smut and Its Host
Source: Oxford University Press journal article supplement (doi:10.1534/g3.117.300318), 2017-12-02
Supplement: 300318_tables7.xlsx [file 300318_tables7.xlsx]

## Sheet: DEGs_FI_9_1_Vs_FU_9_1
GENE	DESCRIPTION	V2	V3	logFC	logCPM	PVal	FDR
c81877_g7	---NA---	22402	1	-14.28	8.24759	6.645e-57	7.434e-53
c91851_g1	---NA---///stomatin mitochondrial	30492	4	-12.85	8.69244	7.088e-57	7.434e-53
c84056_g1	Os01g0148500///---NA---	4	22258	12.4	8.2361	3.933e-54	2.75e-50
c86228_g3	F-box kelch-repeat SKIP6-like///hypothetical protein SOVF_065740 isoform B///Uncharacterized protein isoform 1	13478	3	-12.08	7.51499	1.417e-50	7.434e-47
c61405_g1	F-actin capping alpha subunit	0	8272	16.01	6.80826	1.412e-49	5.923e-46
c59672_g1	RNA dependent RNA polymerse	2	9425	12.11	6.99674	2.4e-48	8.391e-45
c93702_g1	hypothetical protein SOVF_100040	15	20448	10.4	8.11455	6.407e-48	1.92e-44
c81106_g1	protease Do-like 14 isoform X1	0	6463	15.66	6.45243	1.923e-47	5.043e-44
c56096_g1	PREDICTED: uncharacterized protein LOC103498698	2	8181	11.91	6.79266	4.028e-47	9.389e-44
c74661_g1	G2 mitotic-specific cyclin S13-7-like	5069	0	-15.31	6.10454	2.344e-45	4.916e-42
c66264_g1	---NA---	5025	0	-15.3	6.09197	2.787e-45	5.314e-42
c50328_g1	ABC transporter F family member 1	1	5199	12.17	6.13895	3.046e-44	5.324e-41
c87186_g2	DEAD-box ATP-dependent RNA helicase 21-like	1	5122.95	12.15	6.11771	4.082e-44	6.588e-41
c67700_g1	RNA-dependent RNA polymerase	2	4572	11.07	5.95405	4.281e-42	6.414e-39
c74641_g7	DEAD-box ATP-dependent RNA helicase 16	0	3355	14.71	5.50737	8.777e-42	1.207e-38
c77709_g2	unnamed protein product	3341	0	-14.71	5.5037	9.203e-42	1.207e-38
c91424_g2	cofilin actin-depolymerizing factor	3086	0	-14.59	5.3893	4.432e-41	5.469e-38
c67603_g1	ABC transporter F family member 1	0	3073	14.58	5.38086	5.008e-41	5.837e-38
c58693_g1	zinc finger BED domain-containing RICESLEEPER 2-like	0	3029	14.56	5.36008	6.623e-41	7.312e-38
c89600_g2	protease Do-like 14 isoform X2///protease Do-like 14 isoform X1	0	3011	14.55	5.3515	7.453e-41	7.818e-38
c75793_g4	mariner transposase///transposon Mariner sub-class	2990	0	-14.55	5.34377	8.338e-41	8.33e-38
c84583_g2	---NA---	1.01	3452	11.57	5.54886	1.035e-40	9.874e-38
c73054_g1	---NA---	2792	0	-14.45	5.24505	3.234e-40	2.95e-37
c75779_g6	Uncharacterized protein TCM_032491	2785	0	-14.44	5.24144	3.399e-40	2.971e-37
c72900_g2	---NA---	3572	2	-10.72	5.60085	5.534e-40	4.644e-37
c69463_g2	hemiasterlin resistant 1-like	0	2608	14.35	5.1445	1.283e-39	1.035e-36
c71893_g1	trypsin-like peptidase domain	0	2585	14.33	5.13174	1.529e-39	1.188e-36
c83368_g4	60 kDa jasmonate-induced -like	3327	2	-10.61	5.49851	2.258e-39	1.692e-36
c81779_g5	WD repeat-containing 74 isoform X2	2448	0	-14.26	5.05565	4.348e-39	3.145e-36
c92686_g2	F-box At3g29830///F-box LRR-repeat At3g26922-like	2565.68	1.21	-10.91	5.12396	3.55e-38	2.483e-35
c89986_g4	protease Do-like 14 isoform X1	1	2372	11.04	5.00849	1.732e-37	1.172e-34
c73111_g4	uncharacterized LOC100280369///MOR1 isoform X1///---NA---	0	2028	13.98	4.78225	1.85e-37	1.213e-34
c66820_g1	protease Do-like 14 isoform X1	0	2014	13.97	4.77227	2.121e-37	1.348e-34
c68190_g4	protease Do-like 14	1943	0	-13.93	4.72294	4.134e-37	2.551e-34
c34855_g1	hypothetical protein POPTR_0007s13310g	1931	0	-13.92	4.71402	4.671e-37	2.722e-34
c87818_g3	peroxidase 9	13	5333	8.664	6.17888	4.6e-37	2.722e-34
c83383_g4	trypsin-like peptidase domain	0	1855	13.86	4.65388	1.074e-36	6.087e-34
c82645_g2	PREDICTED: uncharacterized protein LOC104894426 isoform X2	8	3839	8.882	5.70457	1.736e-36	9.585e-34
c75410_g3	---NA---	2054	1	-10.84	4.80363	2.855e-36	1.536e-33
c89994_g7	protease Do-like 14 isoform X1	0	1734	13.76	4.55678	4.009e-36	2.102e-33
c82402_g3	---NA---	2257	2	-10.06	4.93992	4.826e-36	2.47e-33
c78004_g2	uridine diphosphate glucose dehydrogenase	2934	5	-9.164	5.31898	6.039e-36	3.016e-33
c89172_g3	pre-rRNA-processing TSR2 homolog	1949	1	-10.76	4.72811	8.015e-36	3.91e-33
c91306_g1	AC099400_1 poly	2401	3	-9.588	5.02952	1.077e-35	5.135e-33
c18134_g1	---NA---	0	1645	13.68	4.48094	1.13e-35	5.268e-33
c90676_g6	serine threonine- kinase At5g01020	0	1547	13.59	4.39255	3.778e-35	1.723e-32
c86661_g2	dynamin-related 4C-like///dynamin 4C	12266	56	-7.774	7.38533	4.851e-35	2.165e-32
c71216_g1	serine threonine- kinase CDL1-like isoform X2///probable serine threonine- kinase RLCKVII	0	1506	13.56	4.3539	6.401e-35	2.797e-32
c68266_g1	PREDICTED: uncharacterized protein LOC104894426 isoform X2	3335	9	-8.516	5.50499	8.625e-35	3.693e-32
c58357_g2	F-box At3g07870-like	0	1443	13.49	4.29242	1.48e-34	6.211e-32
c71442_g3	hypothetical protein SOVF_049520///hypothetical protein SOVF_206040///60 kDa jasmonate-induced -like isoform X4///---NA---	1436	0	-13.49	4.28774	1.585e-34	6.518e-32
c88993_g5	disease resistance RGA3	1	1673	10.54	4.5061	1.665e-34	6.716e-32
c68155_g4	trypsin-like peptidase domain	0	1384.19	13.43	4.23256	3.356e-34	1.328e-31
c68155_g3	protease Do-like 14 isoform X1	0	1337.81	13.38	4.18354	6.507e-34	2.528e-31
c72828_g1	protease Do-like 14 isoform X1	0	1336	13.38	4.18159	6.701e-34	2.556e-31
c86838_g1	WAT1-related At5g07050-like	1555	1	-10.44	4.40322	6.823e-34	2.556e-31
c51555_g1	F-box At3g29830	1320	0	-13.37	4.16657	8.236e-34	3.031e-31
c65115_g2	trypsin-like peptidase domain	1	1487	10.37	4.3366	1.682e-33	6.082e-31
c76328_g4	disease resistance RGA3	3	1857	9.213	4.65775	1.752e-33	6.228e-31
c86601_g4	hypothetical protein SOVF_127610	0	1253	13.29	4.08935	2.351e-33	8.22e-31
c89111_g2	disease resistance RGA2-like	14	3598	7.99	5.61374	2.632e-33	9.051e-31
c91424_g1	zinc finger BED domain-containing RICESLEEPER 2-like	1	1400	10.28	4.24993	5.477e-33	1.853e-30
c64501_g4	---NA---	0	1197	13.22	4.0236	5.746e-33	1.913e-30
c83397_g4	cysteine ase inhibitor-like///cysteine ase inhibitor 6	10	2784	8.101	5.24374	9.239e-33	3.028e-30
c80600_g1	60 kDa jasmonate-induced -like	1127.94	0	-13.14	3.94046	1.769e-32	5.709e-30
c79456_g4	hypothetical protein SOVF_065510	1126	0	-13.14	3.93799	1.831e-32	5.82e-30
c126008_g1	zinc knuckle (CCHC-type) family	1096	0	-13.1	3.89917	3.097e-32	9.698e-30
c50222_g1	---NA---	1092	0	-13.09	3.89391	3.326e-32	1.026e-29
c70658_g1	Fgenesh 35	3	1559	8.96	4.40644	5.347e-32	1.626e-29
c93660_g1	ankyrin repeat-containing At5g02620-like///serine threonine- phosphatase 6 regulatory ankyrin repeat subunit A-like isoform X2	1237	1	-10.11	4.07433	5.967e-32	1.788e-29
c75779_g7	Sorting nexin-13	1017	0	-12.99	3.79164	1.326e-31	3.918e-29
c78913_g2	unnamed protein product///PREDICTED: uncharacterized protein LOC101755892	3675	20	-7.515	5.64882	1.563e-31	4.555e-29
c77543_g2	hypothetical protein SOVF_127610	0	1005	12.97	3.7723	1.736e-31	4.988e-29
c82322_g2	protease Do-like 14 isoform X1///protease Do-like 14 isoform X2	1722	5	-8.395	4.55328	2.14e-31	6.066e-29
c76104_g6	Transposon TX1 149 kDa	933	0	-12.87	3.66778	7.057e-31	1.974e-28
c86702_g3	Fgenesh 35	0	932	12.86	3.66396	7.512e-31	2.073e-28
c78762_g8	glutamic acid-rich -like	1216	2	-9.163	4.05091	8.885e-31	2.421e-28
c67486_g1	---NA---	1	1053	9.868	3.84071	1.419e-30	3.816e-28
c76895_g1	beta-amyrin 28-oxidase-like	0	894	12.8	3.60417	1.684e-30	4.472e-28
c61570_g1	60 kDa jasmonate-induced -like	857	0	-12.74	3.54574	3.65e-30	9.454e-28
c64822_g3	trypsin-like peptidase domain	0	859	12.75	3.54681	3.65e-30	9.454e-28
c75206_g6	peptidyl-prolyl cis-trans isomerase FKBP8-like///peptidyl-prolyl cis-trans isomerase FKBP62-like	0	852	12.73	3.53506	4.277e-30	1.094e-27
c87207_g10	probable pre-mRNA-splicing factor ATP-dependent RNA helicase	6	1555	7.986	4.40553	6.799e-30	1.718e-27
c74639_g4	2-C-methyl-D-erythritol 4-phosphate cytidylyltransferase	1204	3	-8.592	4.03786	8.009e-30	2e-27
c75880_g12	subtilase family	818	0	-12.68	3.47886	8.968e-30	2.213e-27
c94826_g1	Retrotransposon gag///hypothetical protein BVRB_4g095420	0	794	12.63	3.43384	1.671e-29	4.076e-27
c64822_g2	trypsin-like peptidase domain	0	789	12.62	3.42478	1.888e-29	4.552e-27
c84979_g3	---NA---	0	786	12.62	3.41931	2.032e-29	4.844e-27
c80357_g1	TPR domain///---NA---	777.98	0	-12.61	3.40685	2.356e-29	5.553e-27
c91889_g3	retrotransposon Ty3-gypsy subclass///---NA---	0	775	12.6	3.39908	2.667e-29	6.217e-27
c81361_g4	U3 small nucleolar RNA-associated 25-like isoform X1	0	773	12.59	3.39537	2.803e-29	6.462e-27
c77686_g1	---NA---	5248	46	-6.832	6.16713	3.435e-29	7.819e-27
c84343_g1	ribonuclease 1///ribonuclease S-7-like///extracellular ribonuclease LE-like///ribonuclease S13 precursor///self-incompatibility ribonuclease///self-incompatibility associated ribonuclease S1	891	1	-9.632	3.60322	3.466e-29	7.819e-27
c78696_g3	---NA---	0	755	12.56	3.36156	4.415e-29	9.854e-27
c88932_g5	trypsin-like peptidase domain	0	745	12.54	3.34243	5.709e-29	1.261e-26
c85962_g4	F-box LRR-repeat At3g58940-like isoform X1	719	0	-12.49	3.29371	1.072e-28	2.343e-26
c78713_g5	F-box kelch-repeat At3g23880-like	1	841	9.544	3.51811	1.105e-28	2.39e-26
c65119_g2	PREDICTED: uncharacterized protein LOC104899603	0	715	12.48	3.28345	1.259e-28	2.696e-26
c77076_g6	Os01g0148500///non-LTR retroelement reverse transcriptase///reverse transcriptase	829	1	-9.528	3.49977	1.392e-28	2.949e-26
c72318_g2	F-box kelch-repeat At3g23880-like///---NA---	1	822	9.511	3.48534	1.717e-28	3.602e-26
c78913_g1	AC099400_1 poly///unnamed protein product	2892	24	-6.908	5.30764	2.078e-28	4.315e-26
c83793_g3	---NA---	809	1	-9.493	3.46475	2.226e-28	4.579e-26
c56796_g1	PREDICTED: uncharacterized protein LOC104898087///PREDICTED: uncharacterized protein LOC104899834	0	682	12.41	3.21567	3.123e-28	6.36e-26
c16128_g1	---NA---	0	678	12.4	3.20724	3.496e-28	7.052e-26
c40227_g2	trypsin-like peptidase domain	1	785	9.445	3.41931	4.171e-28	8.178e-26
c42962_g2	vesicle-fusing ATPase-like	670	0	-12.39	3.19246	4.146e-28	8.178e-26
c76182_g2	ribonuclease H At1g65750	0	672	12.39	3.19449	4.146e-28	8.178e-26
c80883_g2	---NA---	1	784	9.443	3.41749	4.275e-28	8.303e-26
c73484_g7	---NA---	666	0	-12.38	3.18387	4.649e-28	8.948e-26
c83811_g7	---NA---	663	0	-12.37	3.17739	5.069e-28	9.666e-26
c87737_g1	alpha,alpha-trehalose-phosphate synthase///alpha,alpha-trehalose-phosphate synthase [UDP-forming] 1-like///Trehalose-6-phosphate synthase	1328	7	-7.545	4.18281	5.336e-28	1.006e-25
c90037_g3	---NA---	661	0	-12.37	3.17306	5.37e-28	1.006e-25
c32764_g1	PREDICTED: uncharacterized protein LOC102664004	648	0	-12.34	3.14458	7.849e-28	1.457e-25
c79868_g8	F-box LRR-repeat At4g14103-like isoform X1	1028	4	-7.964	3.81268	9.891e-28	1.82e-25
c71434_g1	protease Do-like 14 isoform X1	1	747	9.373	3.3482	1.083e-27	1.976e-25
c40227_g1	trypsin-like peptidase domain	0	631	12.3	3.10423	1.385e-27	2.505e-25
c74667_g2	F-box LRR-repeat At3g26922-like///F-box LRR-repeat At3g58900-like	1	729	9.338	3.31324	1.731e-27	3.103e-25
c77380_g1	PREDICTED: uncharacterized protein LOC104899180	0	619	12.27	3.07671	2e-27	3.556e-25
c58693_g2	zinc finger BED domain-containing RICESLEEPER 1-like	0	614	12.26	3.06508	2.264e-27	3.991e-25
c80520_g5	---NA---	7	1181	7.371	4.01276	5.318e-27	9.297e-25
c83344_g3	hypothetical protein BVRB_6g128520///ankyrin repeat-containing At3g12360-like	581	0	-12.18	2.98813	6.489e-27	1.125e-24
c75643_g1	Spermidine synthase 3 isoform 3///spermine synthase///Spermidine synthase 3 isoform 1	1326	94999	6.16	10.3493	6.831e-27	1.175e-24
c84700_g10	LRR receptor-like serine threonine- kinase GSO1	676	1	-9.233	3.20736	6.951e-27	1.186e-24
c74417_g4	B3 domain-containing Os01g0723500-like///---NA---	577	0	-12.17	2.97824	7.401e-27	1.252e-24
c82527_g2	PREDICTED: uncharacterized protein LOC101254987	570	0	-12.16	2.96075	9.336e-27	1.567e-24
c90902_g4	serine threonine- phosphatase 7 long form homolog///---NA---	568	0	-12.15	2.95571	9.981e-27	1.662e-24
c80719_g2	retroelement pol poly	0	564	12.14	2.94337	1.142e-26	1.886e-24
c107739_g1	trypsin-like peptidase domain	0	562	12.13	2.93828	1.221e-26	2.002e-24
c87444_g1	peptidyl-prolyl cis-trans isomerase FKBP62-like	815	3	-8.029	3.47885	1.487e-26	2.419e-24
c94838_g2	trypsin-like peptidase domain	0	553	12.11	2.91516	1.66e-26	2.678e-24
c80349_g4	PREDICTED: uncharacterized protein LOC104897968	550	0	-12.1	2.90958	1.84e-26	2.947e-24
c72151_g1	heat shock cognate 70 kDa 2	1	644	9.159	3.13569	1.859e-26	2.954e-24
c87259_g5	peroxidase 40-like///peroxidase 40	4	882	7.738	3.59126	1.964e-26	3.098e-24
c26953_g1	---NA---	543	0	-12.09	2.89123	2.347e-26	3.674e-24
c59019_g1	---NA---	0	539	12.07	2.87844	2.7e-26	4.196e-24
c81296_g3	dynamin-related 1E///Dynamin-related 1E///dynamin-related 1E-like	5	928	7.498	3.66551	3.55e-26	5.476e-24
c70243_g1	PHR1-LIKE 1	617	1	-9.102	3.07661	3.957e-26	6.059e-24
c86601_g1	---NA---	0	512	12	2.80486	7.146e-26	1.086e-23
c89564_g2	trypsin-like peptidase domain	0	509	11.99	2.79645	7.986e-26	1.205e-23
c56560_g1	trypsin-like peptidase domain	0	498	11.96	2.76518	1.207e-25	1.808e-23
c71978_g1	VQ motif-containing 25-like	1	578	9.003	2.98098	1.411e-25	2.1e-23
c90252_g2	poly	4	790	7.579	3.43386	1.622e-25	2.397e-23
c80058_g2	PREDICTED: uncharacterized protein LOC104907630	482	0	-11.91	2.72064	2.234e-25	3.278e-23
c69835_g2	transcription factor RAX3-like	10	1149	6.824	3.97724	2.775e-25	4.042e-23
c89643_g4	PREDICTED: uncharacterized protein LOC104901340	0	473	11.88	2.69148	3.187e-25	4.611e-23
c75782_g2	PREDICTED: uncharacterized protein LOC104903416///PREDICTED: uncharacterized protein LOC104898999	472	0	-11.88	2.69064	3.316e-25	4.765e-23
c78513_g3	lysosomal beta glucosidase-like	4	758	7.52	3.37481	3.575e-25	5.101e-23
c78738_g2	B3 domain-containing transcription factor VRN1-like	542	1	-8.915	2.89123	4.769e-25	6.76e-23
c86340_g2	uroporphyrinogen decarboxylase chloroplastic///uroporphyrinogen decarboxylase chloroplastic isoform X2	462	0	-11.85	2.66001	4.962e-25	6.986e-23
c89291_g4	thiosulfate sulfurtransferase 18-like isoform X2///thiosulfate sulfurtransferase 18-like isoform X1	1227	12	-6.664	4.07547	5.382e-25	7.526e-23
c91445_g3	hypothetical protein BVRB_7g177280	437	0	-11.77	2.58045	1.41e-24	1.959e-22
c84368_g2	tetratricopeptide repeat 28-like	511	1	-8.83	2.80705	1.449e-24	2e-22
c62246_g1	---NA---	436	0	-11.77	2.57718	1.472e-24	2.018e-22
c92319_g4	PREDICTED: uncharacterized protein LOC104890005 isoform X1///PREDICTED: uncharacterized protein LOC104890005 isoform X2	10	1051	6.695	3.85024	1.532e-24	2.086e-22
c77260_g3	hypothetical protein SOVF_188510	0	433	11.76	2.56514	1.675e-24	2.267e-22
c82500_g10	F-box kelch-repeat At1g57790-like///F-box At3g56470-like	633	3	-7.665	3.11777	1.826e-24	2.456e-22
c78717_g1	Mitochondrial-processing peptidase subunit///PREDICTED: uncharacterized protein LOC104112632 isoform X1///PREDICTED: uncharacterized protein LOC104216239 isoform X1///probable zinc protease///PREDICTED: uncharacterized protein LOC105952868	749	5	-7.194	3.3619	2.031e-24	2.714e-22
c73948_g3	Fgenesh 35	0	428	11.74	2.54854	2.082e-24	2.764e-22
c84742_g2	---NA---	0	425	11.73	2.53848	2.374e-24	3.133e-22
c76761_g3	ankyrin repeat-containing At5g02620-like///ankyrin repeat-containing At3g12360-like	1	496	8.782	2.76231	2.54e-24	3.33e-22
c93884_g1	splicing factor 3B subunit 1	3	613	7.614	3.06975	3.455e-24	4.502e-22
c76070_g2	---NA---	414	0	-11.7	2.50317	3.876e-24	5.019e-22
c81999_g1	Os03g0608600	0	411	11.68	2.49062	4.44e-24	5.714e-22
c72880_g9	structural maintenance of chromosomes 2-1///---NA---	409	0	-11.68	2.48581	4.863e-24	6.22e-22
c80330_g3	---NA---	405	0	-11.66	2.47176	5.841e-24	7.426e-22
c77111_g1	B3 domain-containing At5g66980///Y3160_ORYSJ ame: Full= B3 domain-containing Os03g0621600///B3 domain-containing At5g66980 isoform X1	0	403	11.65	2.46254	6.406e-24	8.095e-22
c78229_g14	mariner transposase	4	649	7.296	3.15338	6.844e-24	8.597e-22
c71348_g2	conserved hypothetical protein	400	0	-11.65	2.45402	7.363e-24	9.194e-22
c67181_g1	importin subunit beta-1-like	529	2	-7.962	2.85922	7.745e-24	9.613e-22
c84292_g6	shock SRC2	0	392	11.61	2.42301	1.072e-23	1.323e-21
c80264_g6	Gag-pol poly	391	0	-11.61	2.42151	1.125e-23	1.38e-21
c82509_g4	---NA---	384	0	-11.59	2.39572	1.573e-23	1.919e-21
c94543_g1	nicotinamide mononucleotide adenylyltransferase isoform X1	2	498	7.871	2.77092	2.407e-23	2.919e-21
c88135_g1	PREDICTED: uncharacterized protein LOC104894136///PREDICTED: uncharacterized protein LOC104894134 isoform X2	26711	561	-5.575	8.53122	2.43e-23	2.929e-21
c93502_g1	mediator-associated 1-like	375	0	-11.55	2.36185	2.444e-23	2.929e-21
c77730_g2	---NA---	705	6	-6.849	3.27764	2.631e-23	3.137e-21
c75525_g7	PREDICTED: uncharacterized protein LOC104890366	437	1	-8.604	2.58371	2.724e-23	3.229e-21
c85951_g2	F-box LRR-repeat At4g14103-like isoform X1///F-box LRR-repeat At4g14103-like isoform X2	651	5	-6.992	3.16215	2.879e-23	3.393e-21
c59219_g2	ankyrin repeat-containing At3g12360-like isoform X2///ankyrin repeat-containing At3g12360-like isoform X3	370	0	-11.53	2.34269	3.134e-23	3.673e-21
c78293_g3	serine threonine- phosphatase 6 regulatory ankyrin repeat subunit A-like isoform X1	368	0	-11.53	2.33496	3.465e-23	4.038e-21
c95023_g1	probable nucleoredoxin 1	1510	24	-5.97	4.3827	5.767e-23	6.684e-21
c83327_g2	Fgenesh 35	2	467	7.778	2.67935	8.009e-23	9.231e-21
c87817_g2	chloroplast processing enzyme	408	1	-8.505	2.4858	9.78e-23	1.121e-20
c79940_g2	PREDICTED: uncharacterized protein LOC104903706 isoform X2	0	340	11.41	2.21994	1.494e-22	1.703e-20
c69938_g1	cytokinin dehydrogenase 3	55	2753	5.64	5.25098	1.671e-22	1.894e-20
c80883_g4	---NA---	1	396	8.458	2.44112	1.702e-22	1.919e-20
c78763_g3	fatty acyl- reductase 2-like	1030	15	-6.092	3.83064	1.962e-22	2.201e-20
c71350_g3	probable nucleoredoxin 1	627	6	-6.68	3.11098	2.386e-22	2.663e-20
c77766_g1	ankyrin repeat-containing At3g12360-like///serine threonine- phosphatase 6 regulatory ankyrin repeat subunit A-like	329	0	-11.36	2.17516	2.734e-22	3.035e-20
c76801_g3	PREDICTED: uncharacterized protein LOC104884430///PREDICTED: uncharacterized protein LOC104899180	0	322	11.33	2.14241	4.057e-22	4.479e-20
c70298_g1	PREDICTED: uncharacterized protein LOC104096501///ribonuclease H At1g65750	321	0	-11.33	2.14008	4.295e-22	4.717e-20
c77965_g8	systemin receptor SR160	376	1	-8.387	2.36944	4.437e-22	4.848e-20
c80787_g2	PREDICTED: uncharacterized protein LOC104905839	0	318	11.31	2.1246	5.101e-22	5.515e-20
c90954_g5	cyclic nucleotide-gated ion channel 15	318	0	-11.31	2.1267	5.101e-22	5.515e-20
c78641_g9	F-box LRR-repeat At3g59190-like	369	1	-8.36	2.34269	6.275e-22	6.751e-20
c77113_g10	PREDICTED: uncharacterized protein LOC104908184	0	314	11.29	2.10657	6.43e-22	6.882e-20
c84266_g4	PREDICTED: uncharacterized protein LOC104907437	5	551	6.746	2.92293	6.778e-22	7.217e-20
c74434_g1	PREDICTED: uncharacterized protein LOC104900850	311	0	-11.28	2.09498	7.663e-22	8.079e-20
c81951_g12	inactive TPR repeat-containing thioredoxin TTL3-like///inactive TPR repeat-containing thioredoxin TTL3	310.54	0	-11.28	2.09288	7.663e-22	8.079e-20
c67117_g1	---NA---	310	0	-11.28	2.0904	8.128e-22	8.525e-20
c94131_g1	---NA---	20	1150	5.834	3.99084	9.077e-22	9.474e-20
c85292_g3	F-box At5g07610-like	582	6	-6.573	3.00527	9.912e-22	1.029e-19
c81158_g8	1-aminocyclopropane-1-carboxylate oxidase homolog 1-like	6	576	6.553	2.9884	1.203e-21	1.243e-19
c68941_g1	---NA---	303	0	-11.24	2.05787	1.233e-21	1.268e-19
c80043_g4	replication A 70 kDa DNA-binding subunit D-like///PREDICTED: uncharacterized protein LOC104899123///ATP-dependent DNA helicase PIF1-like	3	444	7.149	2.61064	1.45e-21	1.484e-19
c78923_g5	MLP 43	49	2218	5.494	4.94272	1.599e-21	1.629e-19
c75329_g9	AT hook motif-containing///AC034258_20 helicase	516	5	-6.656	2.83198	2.301e-21	2.332e-19
c78910_g5	---NA---	291.28	0	-11.19	2.00171	2.417e-21	2.438e-19
c89156_g6	CTP synthase-like isoform X1	99	3954	5.316	5.7798	3.234e-21	3.246e-19
c70069_g1	---NA---	285	0	-11.16	1.97069	3.755e-21	3.733e-19
c88982_g5	PREDICTED: uncharacterized protein LOC104893399	285	0	-11.16	1.97069	3.755e-21	3.733e-19
c81783_g2	peptidyl-prolyl cis-trans isomerase PASTICCINO1 isoform X1///peptidyl-prolyl cis-trans isomerase FKBP62-like///70 kDa peptidyl-prolyl isomerase-like///70 kDa peptidyl-prolyl isomerase-like isoform X2	878	15	-5.862	3.6048	3.956e-21	3.914e-19
c81498_g7	---NA---	461	4	-6.807	2.66925	4.007e-21	3.946e-19
c87370_g4	PREDICTED: uncharacterized protein LOC104896195///PREDICTED: uncharacterized protein LOC104891435	4	458	6.793	2.65785	4.521e-21	4.432e-19
c78008_g9	F-box LRR-repeat At3g26922-like	0	282	11.14	1.95357	4.548e-21	4.438e-19
c15784_g1	papain-like cysteine protease	0	281	11.13	1.94852	4.851e-21	4.711e-19
c74231_g8	retroelement pol poly	682	10	-6.076	3.23876	5.18e-21	4.985e-19
c84953_g2	AT hook motif-containing///AC034258_20 helicase	0	280	11.13	1.94345	5.174e-21	4.985e-19
c81988_g4	UPF0481 At3g47200///UPF0481 At3g47200-like	279	0	-11.13	1.94042	5.52e-21	5.288e-19
c86554_g2	zinc finger BED domain-containing RICESLEEPER 2-like	1209	25	-5.591	4.06963	6.746e-21	6.433e-19
c81613_g2	anthocyanidin 5,3-O-glucosyltransferase-like	49	2049	5.38	4.83116	7.155e-21	6.792e-19
c86312_g3	eukaryotic peptide chain release factor subunit 1-3-like	1	321	8.155	2.14242	8.067e-21	7.623e-19
c85829_g2	beta-amyrin 28-oxidase-like	19	987	5.687	3.77377	8.339e-21	7.844e-19
c52821_g2	Peptidyl-prolyl cis-trans isomerase FKBP65	271	0	-11.08	1.89905	9.337e-21	8.745e-19
c36408_g1	PREDICTED: uncharacterized protein LOC104893474	2	360	7.403	2.30938	9.843e-21	9.177e-19
c82184_g2	ribonuclease H At1g65750	1	317	8.137	2.12461	1.014e-20	9.409e-19
c73801_g3	---NA---	0	269	11.07	1.88646	1.067e-20	9.863e-19
c68772_g2	---NA---	268	0	-11.07	1.88322	1.141e-20	1.05e-18
c74933_g2	cytochrome P450 71D10-like///cytochrome P450 71D11-like	9	619	6.082	3.09743	1.175e-20	1.077e-18
c49399_g2	cysteine ase	266	0	-11.06	1.87257	1.306e-20	1.191e-18
c94081_g1	peroxidase 5-like	431	4	-6.71	2.57387	1.387e-20	1.259e-18
c45688_g1	E3 ubiquitin- ligase RNF181-like	265	0	-11.05	1.86722	1.398e-20	1.264e-18
c87991_g6	PREDICTED: uncharacterized protein LOC104236210	0	264	11.04	1.8598	1.496e-20	1.347e-18
c86795_g2	potassium channel AKT1-like	262	0	-11.04	1.85104	1.716e-20	1.538e-18
c84978_g1	chitinase CHI1 precursor	20	982	5.606	3.76805	1.767e-20	1.577e-18
c50319_g1	F-box At5g03970-like	0	261	11.03	1.84356	1.838e-20	1.627e-18
c79350_g7	F-box At1g49610	261	0	-11.03	1.8456	1.838e-20	1.627e-18
c73902_g1	peptidyl-prolyl cis-trans isomerase FKBP62-like	305	1	-8.086	2.07189	2.043e-20	1.801e-18
c91073_g2	serine threonine- phosphatase 7 long form homolog	258	0	-11.01	1.82917	2.262e-20	1.986e-18
c77356_g2	40S ribosomal S17-4-like	2630	71	-5.211	5.19726	2.52e-20	2.203e-18
c29493_g1	ubiquitin-conjugating enzyme	255	0	-11	1.81256	2.79e-20	2.419e-18
c95238_g2	70 kDa peptidyl-prolyl isomerase-like	0	255	10.99	1.81052	2.79e-20	2.419e-18
c84078_g1	basic endochitinase///endochitinase CH25	65	2407	5.206	5.06741	3.217e-20	2.777e-18
c81325_g3	hypothetical protein///RING U-box and TRAF-like domains///---NA---	251	0	-10.97	1.7901	3.704e-20	3.185e-18
c78475_g2	dehydrin Rab18-like	371	3	-6.894	2.35803	3.946e-20	3.379e-18
c70782_g11	serine threonine- phosphatase 6 regulatory ankyrin repeat subunit A-like isoform X2///serine threonine- phosphatase 6 regulatory ankyrin repeat subunit A-like isoform X1	249	0	-10.96	1.77874	4.274e-20	3.63e-18
c76749_g4	PREDICTED: uncharacterized protein LOC104887039	249	0	-10.96	1.77874	4.274e-20	3.63e-18
c66674_g2	replication A 70 kDa DNA-binding subunit D-like	0	248	10.95	1.771	4.593e-20	3.886e-18
c58615_g1	transport Sec24-like At3g07100 isoform X1///transport Sec24-like At3g07100	247	0	-10.95	1.76729	4.938e-20	4.127e-18
c67655_g1	---NA---	247	0	-10.95	1.76729	4.938e-20	4.127e-18
c75206_g8	peptidyl-prolyl cis-trans isomerase FKBP62-like	247	0	-10.95	1.76729	4.938e-20	4.127e-18
c52005_g1	---NA---	0	245	10.94	1.75372	5.709e-20	4.715e-18
c65435_g2	---NA---	0	245	10.94	1.75372	5.709e-20	4.715e-18
c88399_g3	replication A 70 kDa DNA-binding subunit D-like	245	0	-10.94	1.75575	5.709e-20	4.715e-18
c38774_g1	---NA---	244	0	-10.93	1.74994	6.142e-20	4.975e-18
c72839_g3	probable disease resistance At1g58602 isoform X1	244	0	-10.93	1.74994	6.142e-20	4.975e-18
c74185_g2	PREDICTED: uncharacterized protein LOC104891516	0	244	10.93	1.74792	6.142e-20	4.975e-18
c81527_g6	Retrovirus-related Pol poly from transposon TNT 1-94///retroelement pol poly	16	792	5.616	3.45898	6.095e-20	4.975e-18
c84527_g4	---NA---	244	0	-10.93	1.74994	6.142e-20	4.975e-18
c74853_g6	---NA---	0	242	10.92	1.73623	7.114e-20	5.74e-18
c92207_g2	2-isopropylmalate synthase A-like isoform X2	240	0	-10.91	1.72648	8.248e-20	6.629e-18
c88730_g1	A Chain Crystal Structure Of Pokeweed Lectin-C///Agglutinin isolectin 2	555	9	-5.929	2.94555	8.593e-20	6.88e-18
c86751_g6	hypothetical protein SOVF_079340	239	0	-10.9	1.72055	8.885e-20	7.087e-18
c73726_g2	disease resistance At1g50180///CC-NBS-LRR class disease resistance isoform 1	236	0	-10.88	1.70263	1.112e-19	8.806e-18
c74353_g2	---NA---	236	0	-10.88	1.70263	1.112e-19	8.806e-18
c78763_g2	Retrovirus-related Pol poly from transposon TNT 1-94///fatty acyl- reductase 2-like	856	19	-5.487	3.57554	1.138e-19	8.975e-18
c36408_g2	PREDICTED: uncharacterized protein LOC104907384	0	233	10.86	1.68247	1.396e-19	1.097e-17
c79199_g9	peptidyl-prolyl cis-trans isomerase FKBP62-like	231	0	-10.85	1.67225	1.627e-19	1.274e-17
c76696_g4	PREDICTED: uncharacterized protein LOC104899180	0	229	10.84	1.65792	1.899e-19	1.481e-17
c76110_g3	Fgenesh 35	226	0	-10.82	1.64122	2.398e-19	1.863e-17
c72374_g5	PREDICTED: uncharacterized protein LOC104896745	0	224	10.81	1.62662	2.807e-19	2.173e-17
c125756_g1	pentatricopeptide repeat-containing mitochondrial	297	2	-7.13	2.03893	3.227e-19	2.489e-17
c63993_g1	PREDICTED: uncharacterized protein LOC102661023	222	0	-10.8	1.61591	3.289e-19	2.527e-17
c78442_g8	---NA---///PREDICTED: uncharacterized protein LOC104898087///PREDICTED: uncharacterized protein LOC104893320///Cysteine-rich RLK (RECEPTOR kinase) 8///PREDICTED: uncharacterized protein LOC104887355	355	4	-6.43	2.2996	4.781e-19	3.66e-17
c80076_g7	PREDICTED: uncharacterized protein LOC104899180///unnamed protein product///PREDICTED: uncharacterized protein LOC104893474	213	0	-10.74	1.55727	6.819e-19	5.202e-17
c63938_g1	rotamase FKBP 1	212	0	-10.73	1.55061	7.407e-19	5.63e-17
c61499_g1	probable nucleoredoxin 1	211	0	-10.72	1.54391	8.049e-19	6.095e-17
c79624_g6	---NA---	248	1	-7.787	1.77873	8.37e-19	6.316e-17
c86672_g3	retrotransposon unclassified	210	0	-10.72	1.53719	8.748e-19	6.578e-17
c88223_g5	---NA---	0	209	10.71	1.52845	9.512e-19	7.102e-17
c93598_g8	---NA---	0	209	10.71	1.52845	9.512e-19	7.102e-17
c46553_g1	replication factor-A carboxy-terminal domain	0	208	10.7	1.52167	1.035e-18	7.67e-17
c61428_g1	disease resistance RPP13 4	208	0	-10.7	1.52364	1.035e-18	7.67e-17
c89371_g1	serine threonine- phosphatase 7 long form homolog	2	278	7.03	1.94346	1.055e-18	7.79e-17
c74478_g5	probable LRR receptor-like serine threonine- kinase At2g28960	0	206	10.69	1.50799	1.225e-18	9.02e-17
c76103_g7	PHLOEM PROTEIN 2-LIKE A1-like	1	242	7.747	1.7421	1.292e-18	9.477e-17
c57855_g1	hypothetical protein BVRB_7g177280	204	0	-10.67	1.49615	1.454e-18	1.062e-16
c75884_g8	retroelement pol poly	202	0	-10.66	1.48221	1.727e-18	1.258e-16
c91113_g6	disease resistance RGA2-like	358	5	-6.129	2.3154	1.858e-18	1.349e-16
c74434_g2	PREDICTED: uncharacterized protein LOC104900850	0	198	10.63	1.45197	2.447e-18	1.758e-16
c76272_g6	retroelement pol poly -like///retroelement pol poly///PREDICTED: uncharacterized protein LOC105951653	198	0	-10.63	1.45392	2.447e-18	1.758e-16
c87293_g7	heat shock cognate 70 kDa -like///heat shock cognate 70 kDa 2-like///probable mediator of RNA polymerase II transcription subunit 37c	10	489	5.592	2.76809	2.439e-18	1.758e-16
c92944_g1	F-box kelch-repeat At4g34170///F-box Kelch-repeat At5g49000	8424	322	-4.711	6.8909	2.558e-18	1.831e-16
c88390_g6	hypothetical protein SOVF_051990	196	0	-10.62	1.43956	2.92e-18	2.084e-16
c78479_g2	unknown	1	231	7.68	1.67638	2.937e-18	2.089e-16
c67550_g1	---NA---	0	194	10.6	1.42311	3.49e-18	2.474e-16
c78790_g4	PREDICTED: uncharacterized protein LOC104893292	193	0	-10.59	1.41776	3.818e-18	2.688e-16
c86518_g6	PREDICTED: uncharacterized protein LOC104899180	0	193	10.59	1.41581	3.818e-18	2.688e-16
c90248_g2	Retrovirus-related Pol poly from transposon TNT 1-94	0	192	10.58	1.40847	4.178e-18	2.931e-16
c87452_g3	---NA---	1	226	7.649	1.64549	4.315e-18	3.018e-16
c75321_g1	lipoxygenase homology domain-containing 1-like	190	0	-10.57	1.39561	5.01e-18	3.492e-16
c45397_g2	AF525305_2 AP endonuclease reverse transcriptase	188	0	-10.56	1.38066	6.017e-18	4.18e-16
c90252_g1	poly	0	183	10.52	1.34066	9.584e-18	6.635e-16
c92183_g1	---NA---	181	0	-10.5	1.32707	1.158e-17	7.992e-16
c74883_g5	F-box SKIP23-like	180	0	-10.49	1.31925	1.274e-17	8.733e-16
c80033_g1	legumin B-like	180	0	-10.49	1.31925	1.274e-17	8.733e-16
c72813_g1	kunitz-type trypsin inhibitor alpha chain-like	179	0	-10.49	1.31139	1.402e-17	9.58e-16
c72736_g5	nucleolin 1	0	178	10.48	1.30157	1.544e-17	1.051e-15
c73675_g1	polycystic kidney disease 1-like 3///lipoxygenase homology domain-containing 1-like	1	210	7.543	1.54194	1.557e-17	1.057e-15
c71662_g1	diacylglycerol kinase 5 isoform X1///diacylglycerol kinase 5 isoform X3	176	0	-10.46	1.28754	1.874e-17	1.268e-15
c79646_g1	replication A 70 kDa DNA-binding subunit B-like isoform X1///replication A 70 kDa DNA-binding subunit A-like isoform X1	6	339	5.789	2.24079	1.932e-17	1.303e-15
c82060_g2	nuclease HARBI1///PREDICTED: uncharacterized protein LOC104883794///Myb SANT-like DNA-binding domain	5953	252	-4.564	6.39597	1.961e-17	1.319e-15
c89363_g4	disulfide isomerase (PDI)	177	4237	4.578	5.90282	2.119e-17	1.42e-15
c74000_g6	PREDICTED: uncharacterized protein LOC104886897	0	174	10.44	1.26951	2.279e-17	1.518e-15
c75599_g2	uncharacterized mitochondrial g00810-like///retroelement pol poly///retroelement pol poly -like	174	0	-10.45	1.27142	2.279e-17	1.518e-15
c87040_g2	11-beta-hydroxysteroid dehydrogenase 1B-like	173	0	-10.44	1.26329	2.515e-17	1.664e-15
c93660_g2	ankyrin repeat-containing At3g12360-like	173	0	-10.44	1.26329	2.515e-17	1.664e-15
c77297_g11	---NA---	2	230	6.756	1.67639	2.997e-17	1.977e-15
c77220_g4	Uncharacterized protein TCM_032491///Sorting nexin-13	3	253	6.338	1.8161	3.753e-17	2.468e-15
c90309_g2	disease resistance RGA2-like///disease resistance RGA1	17	579	5.077	3.0225	3.799e-17	2.491e-15
c42771_g1	PREDICTED: uncharacterized protein LOC104884024	166	0	-10.38	1.20507	5.086e-17	3.313e-15
c80498_g8	hypothetical protein BVRB_6g143350	166	0	-10.38	1.20507	5.086e-17	3.313e-15
c81545_g2	GDSL esterase lipase At5g41890	10	410	5.338	2.52162	5.819e-17	3.779e-15
c77770_g3	F-box CPR30	164	0	-10.36	1.18799	6.248e-17	4.046e-15
c82164_g11	cysteine synthase 2	2	220	6.692	1.61393	6.497e-17	4.194e-15
c77727_g5	Retrovirus-related Pol poly from transposon TNT 1-94	162	0	-10.34	1.17071	7.693e-17	4.95e-15
c89186_g3	C2H2-like zinc finger///zinc finger ZAT4-like	4	266	6.009	1.89177	8.179e-17	5.247e-15
c77838_g4	retrovirus-related Pol poly from transposon TNT 1-94///uncharacterized mitochondrial g00810-like	0	160	10.32	1.15135	9.492e-17	6.052e-15
c79275_g2	FBD-associated F-box At5g56400 isoform X1	160	0	-10.32	1.15322	9.492e-17	6.052e-15
c84383_g1	cytochrome P450 CYP94A1 family///cytochrome P450 94A1-like///cytochrome P450 94A2-like	20	613	4.927	3.10884	9.856e-17	6.266e-15
c82977_g2	zinc finger BED domain-containing RICESLEEPER 2-like	158.45	0	-10.31	1.13952	1.055e-16	6.668e-15
c87537_g3	AC069473_8 gypsy Ty-3 retroelement poly 69905-74404	159	0	-10.32	1.1444	1.055e-16	6.668e-15
c91444_g4	hypothetical protein SOVF_171710	482	14	-5.095	2.76155	1.092e-16	6.878e-15
c71595_g5	PREDICTED: uncharacterized protein LOC104905839///PREDICTED: uncharacterized protein LOC104897349	158	0	-10.31	1.13552	1.174e-16	7.373e-15
c71536_g5	---NA---	0	157	10.29	1.12471	1.306e-16	8.181e-15
c93342_g2	ankyrin repeat-containing At5g02620-like	235	3	-6.236	1.71458	1.361e-16	8.496e-15
c82776_g4	AC069473_8 gypsy Ty-3 retroelement poly 69905-74404	156	0	-10.29	1.11759	1.455e-16	9.03e-15
c88224_g8	hypothetical protein glysoja_044118	156	0	-10.29	1.11759	1.455e-16	9.03e-15
c89865_g1	disease resistance RGA3	184	1	-7.357	1.35793	1.521e-16	9.409e-15
c87009_g4	PREDICTED: uncharacterized protein LOC104897185	15	494	5.027	2.79651	1.527e-16	9.423e-15
c73651_g3	homeobox-leucine zipper ATHB-40///homeobox-leucine zipper ATHB-40-like	781	29	-4.748	3.46467	1.601e-16	9.849e-15
c91490_g2	SNF1-related kinase regulatory subunit gamma-like PV42a	1835	81	-4.502	4.70269	1.677e-16	1.028e-14
c77396_g1	UDP-glycosyltransferase 87A1-like	8	343	5.398	2.26539	1.722e-16	1.053e-14
c77973_g1	PREDICTED: uncharacterized protein LOC104236210///PREDICTED: uncharacterized protein LOC104902763	153	0	-10.26	1.09028	2.017e-16	1.23e-14
c84507_g3	PREDICTED: uncharacterized protein LOC104225154///retrovirus-related Pol poly from transposon TNT 1-94	151	0	-10.24	1.07178	2.514e-16	1.529e-14
c83196_g3	polygalacturonase inhibitor///polygalacturonase inhibitor-like	520	17	-4.927	2.87525	2.606e-16	1.58e-14
c72373_g1	phytochelatin synthetase family	2	201	6.562	1.48726	3.086e-16	1.865e-14
c68660_g2	ATP-dependent DNA helicase PIF1-like	0	149	10.22	1.0512	3.143e-16	1.889e-14
c83011_g8	ribonuclease H At1g65750-like	0	149	10.22	1.0512	3.143e-16	1.889e-14
c80882_g1	vinorine synthase-like	372	10	-5.202	2.3882	3.267e-16	1.958e-14
c75865_g6	Zinc CCHC-type///hypothetical protein BVRB_2g040700	3	223	6.156	1.63925	3.371e-16	2.015e-14
c63288_g3	PREDICTED: uncharacterized protein LOC104106272	0	148	10.21	1.04174	3.517e-16	2.088e-14
c84072_g3	PREDICTED: uncharacterized protein LOC104893474	148	0	-10.21	1.04358	3.517e-16	2.088e-14
c90728_g1	acidic endochitinase-like	2908	140	-4.378	5.37134	3.523e-16	2.088e-14
c85719_g2	mediator-associated 1-like	34.38	836.99	4.598	3.56743	4.403e-16	2.602e-14
c77208_g1	thaumatin///thaumatin like	5	260	5.663	1.86521	5.332e-16	3.142e-14
c48154_g1	zinc finger BED domain-containing RICESLEEPER 2-like	143	0	-10.16	0.995317	6.232e-16	3.652e-14
c65709_g3	extracellular ribonuclease LE-like isoform X2///self-incompatibility associated ribonuclease	143	0	-10.16	0.995317	6.232e-16	3.652e-14
c85981_g1	F-box FBD LRR-repeat At1g13570-like isoform X1	236	4	-5.841	1.72644	6.549e-16	3.827e-14
c67704_g1	PREDICTED: uncharacterized protein LOC104894097	142	0	-10.15	0.985467	7.001e-16	4.068e-14
c85363_g1	ribonuclease H At1g65750	0	142	10.15	0.983644	7.001e-16	4.068e-14
c94653_g2	short-chain dehydrogenase reductase 2b-like	2028	99	-4.357	4.85311	7.262e-16	4.208e-14
c88042_g3	---NA---///ubiquitin-60S ribosomal L40-like	12	394	5.02	2.4732	7.425e-16	4.291e-14
c89096_g1	hypothetical protein SOVF_199860///PREDICTED: uncharacterized protein LOC104884660	255	5	-5.64	1.84011	7.465e-16	4.302e-14
c91256_g1	betaine aldehyde chloroplastic	15	449	4.89	2.66408	8.314e-16	4.779e-14
c92333_g1	probable indole-3-acetic acid-amido synthetase	93	1903	4.351	4.75946	8.513e-16	4.88e-14
c76834_g1	70 kDa peptidyl-prolyl isomerase-like isoform X2	253	5	-5.629	1.82913	8.554e-16	4.889e-14
c67282_g1	serine threonine- phosphatase 6 regulatory ankyrin repeat subunit B-like	165	1	-7.2	1.20505	9.636e-16	5.493e-14
c90092_g9	poly	139	0	-10.12	0.95551	9.968e-16	5.667e-14
c78851_g1	copia isoform X1	12	386	4.991	2.44477	1.065e-15	6.036e-14
c95038_g2	---NA---	627	25	-4.644	3.15332	1.105e-15	6.25e-14
c76838_g3	gag-pol poly	138	0	-10.11	0.945384	1.123e-15	6.333e-14
c78224_g1	PREDICTED: uncharacterized protein LOC104889602	5	247	5.589	1.79375	1.294e-15	7.279e-14
c87691_g3	replication A 70 kDa DNA-binding subunit D-like	357	11	-5.007	2.33489	1.721e-15	9.655e-14
c79393_g1	disease resistance- dirigent domain	826	37	-4.478	3.55566	1.768e-15	9.893e-14
c73963_g2	strictosidine synthase 1-like	1	159	7.142	1.15136	1.792e-15	9.997e-14
c86567_g1	superoxide-generating NADPH oxidase heavy chain subunit C-like///PIEZO homolog///PREDICTED: uncharacterized protein LOC104908519///PREDICTED: uncharacterized protein LOC104908240///PREDICTED: uncharacterized protein LOC104903021	222	4	-5.753	1.64118	1.872e-15	1.041e-13
c84153_g4	retroelement pol poly	158	1	-7.137	1.14438	1.991e-15	1.105e-13
c81609_g5	---NA---	157	1	-7.128	1.1355	2.213e-15	1.222e-13
c87968_g1	7-deoxyloganetin glucosyltransferase-like	157	1	-7.128	1.1355	2.213e-15	1.222e-13
c78707_g2	nodulin-related family	132	0	-10.05	0.88309	2.331e-15	1.284e-13
c93526_g1	vicilin-like antimicrobial peptides 2-2	198	3	-5.989	1.47516	2.575e-15	1.414e-13
c77965_g1	systemin receptor SR160///systemin receptor SR160-like	130	0	-10.02	0.861713	2.992e-15	1.639e-13
c83335_g1	BURP domain-containing precursor///dehydration-responsive RD22-like isoform X3	17	451	4.717	2.67636	3.22e-15	1.759e-13
c44851_g1	potassium channel AKT1-like	0	129	10.01	0.849123	3.394e-15	1.844e-13
c91108_g4	retroelement pol poly	129	0	-10.01	0.850904	3.394e-15	1.844e-13
c81151_g2	PREDICTED: uncharacterized protein LOC104890449	47	965	4.354	3.78238	3.755e-15	2.035e-13
c73972_g1	PREDICTED: uncharacterized protein LOC104225313	7	269	5.237	1.92304	3.81e-15	2.06e-13
c72832_g1	hypothetical protein BVRB_6g139370 isoform A///PREDICTED: uncharacterized protein LOC104903416///PREDICTED: uncharacterized protein LOC104889325///hypothetical protein BVRB_6g139370 isoform B	128	0	-10	0.840014	3.852e-15	2.072e-13
c77170_g3	replication A 70 kDa DNA-binding subunit A	128	0	-10	0.840014	3.852e-15	2.072e-13
c74262_g1	potassium channel AKT1-like///Retrovirus-related Pol poly from transposon TNT 1-94	2.97	193	5.961	1.43742	3.968e-15	2.129e-13
c77826_g2	lipoxygenase homology domain-containing 1-like///wound stress precursor///lipoxygenase homology domain-containing 1-like isoform X2	231	5	-5.497	1.70259	4.079e-15	2.183e-13
c93712_g4	gag-pol polymerase///retrotransposon Ty1-copia subclass	19	478	4.641	2.76239	4.335e-15	2.314e-13
c77856_g2	rotamase FKBP 1	0	126.97	9.989	0.826937	4.377e-15	2.324e-13
c86712_g3	PREDICTED: uncharacterized protein LOC104909041///PREDICTED: uncharacterized protein LOC104883482///PREDICTED: uncharacterized protein LOC104907437	0	127	9.989	0.827267	4.377e-15	2.324e-13
c51182_g1	---NA---	125	0	-9.968	0.806842	5.662e-15	2.992e-13
c83514_g7	subtilase family	125	0	-9.968	0.806842	5.662e-15	2.992e-13
c75374_g2	eukaryotic translation initiation factor 3 subunit J-like isoform X2///eukaryotic translation initiation factor 3 subunit J-like	124	0	-9.957	0.795613	6.449e-15	3.399e-13
c79728_g7	replication A 70 kDa DNA-binding subunit B-like	147	1	-7.033	1.04357	6.585e-15	3.462e-13
c73110_g7	PREDICTED: uncharacterized protein LOC104897349	0	123	9.943	0.782537	7.351e-15	3.846e-13
c74669_g5	F-box At4g22280-like	0	123	9.943	0.782537	7.351e-15	3.846e-13
c90744_g6	NRT1 PTR FAMILY -like	512	22	-4.535	2.86721	7.858e-15	4.1e-13
c71260_g4	nuclease HARBI1///L10-interacting MYB domain-containing -like	145	1	-7.013	1.02445	8.25e-15	4.294e-13
c69928_g4	PREDICTED: uncharacterized protein LOC104903704	122	0	-9.933	0.772889	8.386e-15	4.355e-13
c90235_g1	basic chitinase 2-2	426	17	-4.639	2.59986	8.707e-15	4.51e-13
c74841_g1	CYSEP_VIGMU ame: Full=Vignain ame: Full=Bean endopeptidase ame: Full=Cysteine ase ame: Full=Sulfhydryl-endopeptidase Short=SH-EP Contains: ame: Full=Vignain-1 Contains: ame: Full=Vignain-2 Flags: Precursor///KDEL-tailed cysteine endopeptidase CEP1///meiotic nuclear division 1 homolog	144	1	-7.004	1.0148	9.243e-15	4.776e-13
c102302_g1	splicing proline- and glutamine-rich-like	121	0	-9.922	0.761391	9.576e-15	4.924e-13
c83237_g5	regulatory-associated of TOR 1	121	0	-9.922	0.761391	9.576e-15	4.924e-13
c57668_g1	NRT1 PTR FAMILY -like isoform X2	120	0	-9.91	0.749801	1.094e-14	5.613e-13
c73083_g3	mechanosensitive ion channel 4-like isoform X2	119	0	-9.898	0.738118	1.252e-14	6.39e-13
c81911_g1	retroelement pol poly	119	0	-9.898	0.738118	1.252e-14	6.39e-13
c78456_g3	---NA---	2	161	6.242	1.17752	1.298e-14	6.592e-13
c87658_g1	GDSL esterase lipase At4g10955-like	161	2	-6.247	1.17935	1.298e-14	6.592e-13
c71741_g5	O-glucosyltransferase rumi homolog	118	0	-9.885	0.726338	1.433e-14	7.245e-13
c76601_g3	ribonuclease H At1g65750	118	0	-9.885	0.726338	1.433e-14	7.245e-13
c86961_g4	RNA polymerase II C-terminal domain phosphatase-like 4	0	117	9.871	0.712727	1.643e-14	8.283e-13
c80898_g5	E3 ubiquitin- ligase At1g63170 isoform X2///E3 ubiquitin- ligase At1g12760-like	0	116	9.858	0.700756	1.884e-14	9.478e-13
c86467_g1	PREDICTED: uncharacterized protein LOC104894134 isoform X1///PREDICTED: uncharacterized protein LOC104894134 isoform X2///PREDICTED: uncharacterized protein LOC104894136	10130	646	-3.973	7.19185	2.038e-14	1.023e-12
c90314_g1	transcription factor MYC2-like	919	50	-4.199	3.72205	2.132e-14	1.068e-12
c87791_g1	ribonuclease H At1g65750	115	0	-9.848	0.690413	2.163e-14	1.08e-12
c87316_g3	disease resistance RGA4 isoform X1///disease resistance RGA1 isoform X1///disease resistance RGA1///disease resistance RGA3	387	16	-4.588	2.46461	2.294e-14	1.143e-12
c79071_g6	zinc knuckle domain containing///PREDICTED: uncharacterized protein LOC104883423///PREDICTED: uncharacterized protein K02A2.6-like	155	2	-6.192	1.12656	2.428e-14	1.207e-12
c89737_g2	heat shock cognate 70 kDa -like///heat shock 70 kDa -like///heat shock cognate 70 kDa 2-like	1	135	6.906	0.923125	2.649e-14	1.314e-12
c80860_g1	probable inactive serine threonine- kinase fnkC///TRAF-like family isoform 2	113	0	-9.823	0.665955	2.86e-14	1.412e-12
c86141_g3	---NA---	0	113	9.821	0.664237	2.86e-14	1.412e-12
c90131_g1	anthocyanidin 3-O-glucosyltransferase 7-like///UDP-glucose:flavonoid 3-O-glucosyltransferase	16	381	4.561	2.4412	3.002e-14	1.478e-12
c91043_g1	GDSL esterase lipase EXL3-like	66	1145	4.112	4.04045	3.07e-14	1.508e-12
c71844_g3	1-aminocyclopropane-1-carboxylate oxidase homolog 4-like	112	0	-9.81	0.65357	3.293e-14	1.614e-12
c83011_g12	PREDICTED: uncharacterized protein LOC104884717	1	133	6.884	0.90237	3.374e-14	1.65e-12
c82797_g1	methylesterase 17-like///methyl esterase 17	20	439	4.445	2.6486	3.521e-14	1.718e-12
c90321_g8	abnormal spindle-like microcephaly-associated homolog	252	8	-4.958	1.84008	3.556e-14	1.731e-12
c77727_g6	poly///Retrovirus-related Pol poly from transposon TNT 1-94	186	4	-5.498	1.39557	3.697e-14	1.795e-12
c60915_g3	PREDICTED: uncharacterized protein LOC104905511///PREDICTED: uncharacterized protein LOC104888642	111	0	-9.797	0.641076	3.796e-14	1.835e-12
c76103_g6	PHLOEM PROTEIN 2-LIKE A1-like	0	111	9.795	0.639366	3.796e-14	1.835e-12
c72689_g3	Transcription factor HBP-1b(c1)///transcription factor HBP-1b(c38)	17	391	4.511	2.48024	3.827e-14	1.846e-12
c77383_g6	nucleobase-ascorbate transporter 4	109	0	-9.771	0.615761	5.059e-14	2.429e-12
c82179_g5	PREDICTED: uncharacterized protein LOC104885396///DNA RNA polymerases superfamily	109	0	-9.771	0.615761	5.059e-14	2.429e-12
c86904_g2	probable receptor kinase At5g47070	338	14	-4.584	2.27144	5.385e-14	2.579e-12
c68830_g3	PREDICTED: uncharacterized protein LOC104899603	108	0	-9.758	0.602935	5.849e-14	2.795e-12
c74354_g2	---NA---	107	0	-9.744	0.589993	6.771e-14	3.221e-12
c87097_g4	probable nucleoredoxin 1	107	0	-9.744	0.589993	6.771e-14	3.221e-12
c79391_g3	RNA-directed DNA polymerase///PREDICTED: uncharacterized protein LOC104888903	179	4	-5.443	1.34255	6.978e-14	3.312e-12
c72868_g1	ribonuclease H At1g65750	0	106	9.728	0.575247	7.845e-14	3.69e-12
c78442_g6	AC025782_3 Ty1 copia-element poly///retroelement pol poly	106	0	-9.731	0.576935	7.845e-14	3.69e-12
c85038_g1	PREDICTED: uncharacterized protein LOC104883431///hypothetical protein SOVF_188640	0	106	9.728	0.575247	7.845e-14	3.69e-12
c87485_g1	LRR receptor-like kinase family///leucine-rich repeat receptor kinase///LRR receptor-like serine threonine- kinase GSO1///probably inactive leucine-rich repeat receptor kinase At2g25790///LRR receptor-like kinase	106	0	-9.731	0.576935	7.845e-14	3.69e-12
c89502_g6	kinase 4-like///PREDICTED: uncharacterized protein LOC101264623	105	0	-9.717	0.563757	9.101e-14	4.271e-12
c78641_g3	F-box LRR-repeat	4	176	5.414	1.31738	9.219e-14	4.317e-12
c88540_g6	probable indole-3-acetic acid-amido synthetase	4	175	5.405	1.30952	1.012e-13	4.731e-12
c69954_g1	---NA---	0	104	9.701	0.54878	1.057e-13	4.916e-12
c75115_g1	probable LRR receptor-like serine threonine- kinase At4g36180-like isoform X1	0	104	9.701	0.54878	1.057e-13	4.916e-12
c72211_g1	PREDICTED: uncharacterized protein LOC104891474 isoform X1	103	0	-9.689	0.537035	1.229e-13	5.69e-12
c82468_g2	PREDICTED: uncharacterized protein LOC105967929///retroelement pol poly -like	103	0	-9.689	0.537035	1.229e-13	5.69e-12
c89920_g1	prolyl endopeptidase-like///Prolyl oligopeptidase family	245	3509	3.837	5.66945	1.608e-13	7.431e-12
c76796_g3	F-box SKIP23-like	101	0	-9.661	0.509809	1.666e-13	7.683e-12
c75455_g1	predicted protein///PI-PLC X domain-containing At5g67130	1	120	6.736	0.759654	1.751e-13	8.055e-12
c88861_g3	outer envelope chloroplastic-like///serine threonine- phosphatase 5	100	0	-9.647	0.496	1.944e-13	8.925e-12
c64672_g1	E3 ubiquitin- ligase SINAT5-like	99	0	-9.632	0.482059	2.271e-13	1.033e-11
c71351_g4	F-box At5g50220	0	99	9.63	0.480405	2.271e-13	1.033e-11
c90095_g4	F-box At5g62510-like	0	99	9.63	0.480405	2.271e-13	1.033e-11
c94455_g2	cysteine--tRNA cytoplasmic isoform X1	0	99	9.63	0.480405	2.271e-13	1.033e-11
c90648_g2	disease resistance RGA2-like	689	42	-4.034	3.31733	2.512e-13	1.141e-11
c78375_g3	serine carboxypeptidase-like 18 isoform X1///PREDICTED: uncharacterized protein LOC104889316	117	1	-6.704	0.726324	2.612e-13	1.184e-11
c83459_g7	non-LTR retroelement reverse transcriptase	0	98	9.615	0.466333	2.656e-13	1.201e-11
c87031_g2	PREDICTED: uncharacterized protein LOC104889331	279	12	-4.527	2.00025	2.788e-13	1.258e-11
c83545_g1	MATE efflux family 6	3	149	5.574	1.07924	2.845e-13	1.281e-11
c75115_g5	LRR receptor-like kinase family///Disease resistance family LRR family///LRR receptor-like serine threonine- kinase FLS2///probable leucine-rich repeat receptor kinase At1g35710	0	97	9.601	0.452121	3.11e-13	1.394e-11
c75115_g6	leucine-rich repeat receptor kinase EXS-like///LRR receptor-like serine threonine- kinase RPK2	0	97	9.601	0.452121	3.11e-13	1.394e-11
c79081_g2	uncharacterized mitochondrial g00810-like	4	161	5.285	1.19471	3.945e-13	1.765e-11
c89392_g1	F-box only 15	14	300	4.407	2.10666	4.034e-13	1.801e-11
c87154_g2	CYSEP_VIGMU ame: Full=Vignain ame: Full=Bean endopeptidase ame: Full=Cysteine ase ame: Full=Sulfhydryl-endopeptidase Short=SH-EP Contains: ame: Full=Vignain-1 Contains: ame: Full=Vignain-2 Flags: Precursor///vignain-like	893	59	-3.919	3.6966	4.049e-13	1.803e-11
c81401_g1	thaumatin like///P21-like	2	130	5.934	0.881326	4.169e-13	1.853e-11
c86332_g2	retroelement pol poly	5	175	5.092	1.31739	4.183e-13	1.855e-11
c53282_g1	PREDICTED: uncharacterized protein LOC104887355	95	0	-9.573	0.424904	4.28e-13	1.89e-11
c94563_g3	hypothetical protein SOVF_138000	95	0	-9.573	0.424904	4.28e-13	1.89e-11
c73288_g1	PREDICTED: uncharacterized protein LOC104897263 isoform X2///PREDICTED: uncharacterized protein LOC104897263 isoform X1	806	53	-3.926	3.54894	4.828e-13	2.128e-11
c76749_g5	Sn1-specific diacylglycerol lipase alpha	94	0	-9.558	0.410255	5.031e-13	2.203e-11
c77639_g1	AC051633_7 gag pol poly///copia isoform X1	94	0	-9.558	0.410255	5.031e-13	2.203e-11
c86827_g2	two-component response regulator ARR17	0	94	9.555	0.408628	5.031e-13	2.203e-11
c77728_g2	zinc finger MYM-type 1-like	112	1	-6.641	0.66594	5.182e-13	2.265e-11
c78908_g1	---NA---	150	2050	3.769	4.89963	5.445e-13	2.375e-11
c74868_g1	probable receptor kinase At1g67000	93	0	-9.542	0.395455	5.922e-13	2.577e-11
c86795_g1	potassium channel AKT1-like///probable pectate lyase 5	6	184	4.907	1.39374	6.657e-13	2.885e-11
c91483_g1	probable nucleoredoxin 1	1071	75	-3.836	3.96315	6.642e-13	2.885e-11
c84634_g4	zinc finger MYM-type 1-like	170	5	-5.055	1.27945	6.694e-13	2.896e-11
c89106_g2	uncharacterized mitochondrial g00810-like///cyclin dependent kinase///cell division control 2 homolog	1006	70	-3.845	3.87255	6.803e-13	2.937e-11
c90864_g7	glutamine synthetase family///glutamine synthetase nodule isozyme-like	1	110	6.611	0.639382	6.862e-13	2.956e-11
c88575_g1	FBD-associated F-box At2g26860-like///F-box LRR-repeat At3g18150///F-box At1g49610	3	141.45	5.499	1.00769	6.892e-13	2.963e-11
c72725_g10	retrovirus-related Pol poly from transposon TNT 1-94	0	92	9.524	0.378886	6.979e-13	2.988e-11
c75709_g1	vesicle-fusing ATPase-like	92	0	-9.527	0.380502	6.979e-13	2.988e-11
c94916_g1	Retrovirus-related Pol poly from transposon TNT 1-94	21	381	4.171	2.4591	7.029e-13	3.003e-11
c92572_g1	hypothetical protein VITISV_024822///hypothetical protein VITISV_034155	380	21	-4.172	2.45747	7.345e-13	3.132e-11
c73630_g19	hypothetical protein BVRB_2g038990	125	2	-5.882	0.829013	7.752e-13	3.299e-11
c57514_g1	retroelement pol poly -like	0	91	9.509	0.363782	8.237e-13	3.484e-11
c73963_g3	strictosidine synthase 1-like	0	91	9.509	0.363782	8.237e-13	3.484e-11
c77057_g4	unnamed protein product	91	0	-9.511	0.365392	8.237e-13	3.484e-11
c86831_g3	mannose glucose-specific lectin-like	2931	226	-3.699	5.42191	9.17e-13	3.87e-11
c73624_g1	PREDICTED: uncharacterized protein LOC104908685 isoform X1	90	0	-9.495	0.350122	9.734e-13	4.092e-11
c88999_g1	non-ltr retrotransposon reverse transcriptase///ribonuclease H At1g65750	90	0	-9.495	0.350122	9.734e-13	4.092e-11
c89100_g4	S1 P1 nuclease family///endonuclease 4-like	386	4900	3.663	6.16277	1.014e-12	4.253e-11
c91363_g1	probable E3 ubiquitin- ligase ARI5///probable E3 ubiquitin- ligase ARI8///probable E3 ubiquitin- ligase ARI7	122	2	-5.847	0.795584	1.136e-12	4.755e-11
c84025_g2	PREDICTED: uncharacterized protein LOC104119680///uncharacterized mitochondrial g00810-like	0	89	9.477	0.333091	1.152e-12	4.814e-11
c71388_g7	PREDICTED: uncharacterized protein LOC104898448	3	136	5.443	0.953735	1.223e-12	5.1e-11
c91531_g4	---NA---	190	7	-4.74	1.44669	1.276e-12	5.311e-11
c77064_g3	glycine-rich RNA-binding mitochondrial-like	88	0	-9.463	0.319089	1.365e-12	5.649e-11
c78680_g9	PREDICTED: uncharacterized protein LOC104884430	0	88	9.46	0.317497	1.365e-12	5.649e-11
c86295_g1	PREDICTED: uncharacterized protein LOC104883796	88	0	-9.463	0.319089	1.365e-12	5.649e-11
c82563_g2	zinc finger MYM-type 1-like	7	188	4.72	1.43045	1.515e-12	6.254e-11
c77178_g3	F-box SKIP23-like	87	0	-9.446	0.303319	1.621e-12	6.653e-11
c86533_g1	nuclease HARBI1///nuclease HARBI1-like	87	0	-9.446	0.303319	1.621e-12	6.653e-11
c92111_g3	PREDICTED: uncharacterized protein LOC104891244///---NA---	87	0	-9.446	0.303319	1.621e-12	6.653e-11
c78271_g2	zinc finger BED domain-containing RICESLEEPER 2-like	86	0	-9.43	0.287374	1.926e-12	7.869e-11
c79827_g6	---NA---///probable disease resistance At1g51480	0	86	9.427	0.285794	1.926e-12	7.869e-11
c81194_g4	glutathione S-transferase T3-like	198	8	-4.61	1.50988	1.928e-12	7.869e-11
c74349_g2	gag-pol poly	102	1	-6.507	0.537019	2.198e-12	8.951e-11
c82079_g3	hydroxcinnamoyl- quinate shikimate partial///shikimate O-hydroxycinnamoyltransferase-like	85	0	-9.413	0.271252	2.293e-12	9.287e-11
c82527_g1	retroelement pol poly -like///PREDICTED: uncharacterized protein LOC104907439	0	85	9.41	0.269678	2.293e-12	9.287e-11
c94391_g4	AC011808_5 retroelement poly///polypeptide with an integrase domain	0	85	9.41	0.269678	2.293e-12	9.287e-11
c77454_g5	LRR receptor-like kinase family///probable LRR receptor-like serine threonine- kinase At4g08850///receptor 12///probable LRR receptor-like serine threonine- kinase At4g36180///LRR receptor-like serine threonine- kinase GSO2///LRR receptor-like kinase///probable LRR receptor-like serine threonine- kinase At1g12460///Disease resistance family LRR family	5	157	4.936	1.16889	2.4e-12	9.702e-11
c76518_g6	F-box SKIP23-like	48	674	3.806	3.29758	2.52e-12	1.017e-10
c44497_g1	PREDICTED: LOW QUALITY PROTEIN: uncharacterized protein LOC105117228	84	0	-9.396	0.254947	2.734e-12	1.099e-10
c73801_g6	---NA---	84	0	-9.396	0.254947	2.734e-12	1.099e-10
c68510_g1	CCLS4 protein///MROS3B///MROS3	7513	87403	3.538	10.3282	3.024e-12	1.213e-10
c94069_g3	PREDICTED: uncharacterized protein LOC104899534	179	7	-4.654	1.36548	3.336e-12	1.335e-10
c94842_g1	glycerophosphodiester phosphodiesterase GDPDL7-like	274	15	-4.182	1.99042	3.744e-12	1.496e-10
c63689_g2	PREDICTED: uncharacterized protein LOC105162745///PREDICTED: uncharacterized protein LOC104883796///PREDICTED: uncharacterized protein LOC104888940	82	0	-9.361	0.221773	3.905e-12	1.546e-10
c81911_g8	retroelement pol poly -like	82	0	-9.361	0.221773	3.905e-12	1.546e-10
c81937_g2	probable phosphatase 2C 75-like///PREDICTED: uncharacterized protein LOC104896745	82	0	-9.361	0.221773	3.905e-12	1.546e-10
c82091_g7	pyridoxal phosphate phosphatase-like isoform X1	82	0	-9.361	0.221773	3.905e-12	1.546e-10
c82820_g1	aspartic ase CDR1-like	0	82	9.359	0.220219	3.905e-12	1.546e-10
c86447_g3	PREDICTED: uncharacterized protein LOC104891435///PREDICTED: uncharacterized protein LOC104898574	7	177	4.633	1.34843	3.993e-12	1.577e-10
c71962_g1	PREDICTED: uncharacterized protein LOC104225313	97	1	-6.434	0.467964	4.715e-12	1.859e-10
c88183_g1	MAP3K-like kinase	137	4	-5.057	0.975499	5.152e-12	2.028e-10
c74645_g1	F-box CPR30-like	5	149	4.86	1.09764	5.493e-12	2.158e-10
c89360_g3	probable nucleoredoxin 2	2906	250	-3.541	5.42143	5.508e-12	2.16e-10
c71406_g5	PREDICTED: uncharacterized protein LOC105951653	80	0	-9.325	0.187819	5.615e-12	2.185e-10
c76796_g6	F-box SKIP23-like	80	0	-9.325	0.187819	5.615e-12	2.185e-10
c82776_g1	AC069473_8 gypsy Ty-3 retroelement poly 69905-74404	80	0	-9.325	0.187819	5.615e-12	2.185e-10
c89226_g4	rab3 GTPase-activating non-catalytic subunit	80	0	-9.325	0.187819	5.615e-12	2.185e-10
c75019_g1	seed maturation PM27 precursor	472	33	-3.836	2.78721	5.685e-12	2.209e-10
c72944_g5	retroelement pol poly	95	1	-6.404	0.439389	6.452e-12	2.502e-10
c92217_g3	ankyrin repeat-containing At3g12360-like isoform X3	12	230	4.244	1.73634	6.664e-12	2.574e-10
c95134_g4	F-box SKIP23-like///F-box At1g65770	230	12	-4.249	1.73816	6.664e-12	2.574e-10
c83294_g3	peroxidase 44-like///peroxidase 57///peroxidase 57-like	33	467	3.815	2.77106	6.779e-12	2.614e-10
c78126_g2	myb A	1	94	6.384	0.423289	7.562e-12	2.911e-10
c58748_g1	---NA---	78	0	-9.289	0.153047	8.126e-12	3.122e-10
c89945_g2	tyrosine aminotransferase-like	6	157	4.679	1.17756	8.442e-12	3.238e-10
c85399_g1	F-box LRR-repeat At4g14103-like isoform X1	93	1	-6.373	0.410237	8.874e-12	3.397e-10
c52653_g1	gag-pol identical///retrotransposon unclassified	77	0	-9.27	0.135341	9.802e-12	3.718e-10
c75773_g4	agamous-like MADS-box AGL80	77	0	-9.27	0.135341	9.802e-12	3.718e-10
c88042_g5	---NA---	0	77	9.268	0.133821	9.802e-12	3.718e-10
c91925_g3	PREDICTED: uncharacterized protein LOC104905839	0	77	9.268	0.133821	9.802e-12	3.718e-10
c94684_g2	probable leucine-rich repeat receptor kinase At5g49770	77	0	-9.27	0.135341	9.802e-12	3.718e-10
c77247_g3	GDSL esterase lipase At5g03610-like///GDSL esterase lipase	2	106	5.64	0.601269	9.924e-12	3.751e-10
c86618_g1	---NA---	2	106	5.64	0.601269	9.924e-12	3.751e-10
c83900_g1	ankyrin repeat-containing At3g12360-like isoform X3	131	4	-4.993	0.91452	1.034e-11	3.903e-10
c79572_g3	glutamate receptor -like	105	2	-5.631	0.589962	1.146e-11	4.315e-10
c67617_g1	trihelix transcription factor ASIL2-like///trihelix transcription factor ASIL1-like isoform X1	76	0	-9.251	0.117416	1.184e-11	4.437e-10
c74780_g1	F-box At3g58860	76	0	-9.251	0.117416	1.184e-11	4.437e-10
c75652_g1	ribonuclease H At1g65750	76	0	-9.251	0.117416	1.184e-11	4.437e-10
c85009_g2	probable phosphatase 2C 23///probable phosphatase 2C 23 isoform X1	793	65	-3.609	3.54724	1.234e-11	4.616e-10
c78393_g1	serine threonine- phosphatase 6 regulatory ankyrin repeat subunit A-like isoform X1///ankyrin repeat-containing At3g12360-like	117	3	-5.23	0.749758	1.272e-11	4.747e-10
c82568_g2	ribonuclease H///ribonuclease H At1g65750	28	395	3.81	2.53188	1.301e-11	4.847e-10
c53188_g1	---NA---	75	0	-9.232	0.099265	1.434e-11	5.295e-10
c78639_g10	copia isoform X1	0	75	9.23	0.097759	1.434e-11	5.295e-10
c80159_g1	LRR receptor-like serine threonine- kinase FLS2///probable leucine-rich repeat receptor kinase At5g63930	75.07	0	-9.234	0.100543	1.434e-11	5.295e-10
c87888_g6	Cysteine-rich RLK (RECEPTOR kinase) 8///retrovirus-related like poly	75	0	-9.232	0.099265	1.434e-11	5.295e-10
c89601_g6	unnamed protein product	75	0	-9.232	0.099265	1.434e-11	5.295e-10
c89858_g4	disease resistance RGA1	174	8	-4.424	1.33477	1.52e-11	5.603e-10
c79774_g2	uncharacterized membrane At3g27390///uncharacterized membrane At3g27390 isoform X1	441	33	-3.738	2.69654	1.736e-11	6.389e-10
c95248_g1	disease resistance RGA3	102	2	-5.589	0.550426	1.774e-11	6.516e-10
c79874_g5	uncharacterized mitochondrial g00810-like///L-type lectin-domain containing receptor kinase -like///Retrovirus-related Pol poly from transposon TNT 1-94	114	3	-5.193	0.714418	1.89e-11	6.93e-10
c56329_g3	Retrovirus-related Pol poly from transposon TNT 1-94	73	0	-9.193	0.062263	2.113e-11	7.681e-10
c72977_g12	retrotransposon unclassified///copia isoform X1	0	73	9.191	0.060773	2.113e-11	7.681e-10
c76517_g1	ribonuclease H At1g65750	73	0	-9.193	0.062263	2.113e-11	7.681e-10
c78646_g4	acidic mammalian chitinase-like	73	0	-9.193	0.062263	2.113e-11	7.681e-10
c88395_g3	AC069473_8 gypsy Ty-3 retroelement poly 69905-74404	0	73	9.191	0.060773	2.113e-11	7.681e-10
c67311_g1	NAC domain-containing 100-like	674	56	-3.589	3.31532	2.12e-11	7.693e-10
c92129_g1	benzyl alcohol O-benzoyltransferase-like	18	276	3.927	2.01299	2.386e-11	8.646e-10
c88353_g1	F-box CPR30-like	223	13	-4.09	1.70252	2.396e-11	8.667e-10
c72858_g2	PREDICTED: uncharacterized protein LOC104898724	86	1	-6.261	0.303301	2.822e-11	1.019e-09
c87988_g3	formin 4	5	134	4.708	0.953761	2.861e-11	1.031e-09
c91432_g2	23 kDa jasmonate-induced -like	188	10	-4.218	1.45382	3.025e-11	1.088e-09
c78346_g3	Fgenesh 35	71	0	-9.153	0.024287	3.137e-11	1.127e-09
c70365_g1	probable xyloglucan endotransglucosylase hydrolase 25///probable xyloglucan endotransglucosylase hydrolase 23	166	8	-4.356	1.27133	3.178e-11	1.14e-09
c74544_g2	hypothetical protein SOVF_165580	455	36	-3.658	2.74695	3.231e-11	1.157e-09
c77901_g2	seed maturation LEA 4	260	17	-3.927	1.93006	3.327e-11	1.189e-09
c79813_g8	peptidyl-prolyl cis-trans FKBP-type///peptidyl-prolyl cis-trans isomerase FKBP65-like	109	1188	3.442	4.13918	3.526e-11	1.258e-09
c83679_g5	retroelement pol poly///hypothetical protein VITISV_011708///hypothetical protein VITISV_017631	132	5	-4.691	0.935121	3.603e-11	1.283e-09
c72620_g1	MLP 43	117	1264	3.43	4.22944	3.729e-11	1.326e-09
c83645_g1	unnamed protein product	70	0	-9.133	0.004918	3.834e-11	1.359e-09
c87027_g1	ankyrin repeat and kinase domain-containing 1-like	70	0	-9.133	0.004918	3.834e-11	1.359e-09
c70526_g1	Em GEA1	789	70	-3.495	3.5489	3.926e-11	1.389e-09
c77422_g1	dehydrodolichyl diphosphate synthase 2-like	4	120	4.862	0.793907	3.967e-11	1.401e-09
c82115_g1	zeatin O-glucosyltransferase-like	20	285	3.822	2.06529	4.623e-11	1.63e-09
c48154_g2	zinc finger BED domain-containing RICESLEEPER 2-like	69	0	-9.112	-0.014715	4.696e-11	1.645e-09
c56172_g1	tetraspanin-7-like isoform X1	0	69	9.11	-0.016173	4.696e-11	1.645e-09
c78611_g3	F-box kelch-repeat At3g06240-like	69	0	-9.112	-0.014715	4.696e-11	1.645e-09
c84647_g8	MLP1-like isoform X1	0	69	9.11	-0.016173	4.696e-11	1.645e-09
c78764_g1	probable carboxylesterase 2	107	3	-5.102	0.628428	4.912e-11	1.717e-09
c81079_g9	reverse transcriptase	649	57	-3.509	3.26735	5.038e-11	1.759e-09
c84445_g3	PREDICTED: uncharacterized protein LOC102661920///PREDICTED: uncharacterized protein LOC105967929///AC009323_8 retroelement poly	16	242	3.906	1.82726	5.452e-11	1.897e-09
c91038_g4	cysteine-rich receptor kinase 10///cysteine-rich receptor kinase 25	242	16	-3.911	1.82905	5.452e-11	1.897e-09
c52554_g1	dehydrodolichyl diphosphate synthase 2-like	68	0	-9.091	-0.034619	5.763e-11	1.992e-09
c79869_g8	replication A 70 kDa DNA-binding subunit D-like	68	0	-9.091	-0.034619	5.763e-11	1.992e-09
c86544_g5	probable disease resistance At4g27220 isoform X3	0	68	9.089	-0.036069	5.763e-11	1.992e-09
c89579_g3	---NA---	0	68	9.089	-0.036069	5.763e-11	1.992e-09
c88721_g2	23 kDa jasmonate-induced -like	5584	565	-3.307	6.38277	5.796e-11	2e-09
c93987_g4	nucleosome assembly 1 4	94	2	-5.471	0.439372	5.972e-11	2.057e-09
c89582_g1	stem-specific TSJT1-like	2887	289	-3.322	5.43051	6.296e-11	2.165e-09
c88960_g4	methionine adenosyltransferase 2 subunit beta	169	9	-4.214	1.30339	6.384e-11	2.192e-09
c70043_g2	probable xyloglucan endotransglucosylase hydrolase 23	238	16	-3.887	1.80685	7.092e-11	2.415e-09
c75316_g3	F-box LRR-repeat At4g14103-like isoform X1	67	0	-9.07	-0.054801	7.088e-11	2.415e-09
c80147_g7	poly	67	0	-9.07	-0.054801	7.088e-11	2.415e-09
c86172_g2	prolyl endopeptidase-like	0	67	9.068	-0.056242	7.088e-11	2.415e-09
c92570_g2	PREDICTED: uncharacterized protein LOC104903416	67	0	-9.07	-0.054801	7.088e-11	2.415e-09
c90357_g2	dehydration-responsive element-binding 2D-like	267	19	-3.806	1.97554	7.349e-11	2.499e-09
c93139_g1	ABC transporter G family member 35-like///ABC transporter G family member 29-like	16	237	3.876	1.79947	7.578e-11	2.572e-09
c92336_g2	serine threonine- kinase At5g01020	86	910	3.399	3.75957	8.026e-11	2.72e-09
c70401_g1	bidirectional sugar transporter SWEET14	80	1	-6.157	0.204877	8.047e-11	2.723e-09
c76902_g14	ribonuclease H At1g65750	0	66	9.046	-0.076702	8.737e-11	2.932e-09
c82170_g3	PREDICTED: uncharacterized protein LOC104907384	66	0	-9.048	-0.075269	8.737e-11	2.932e-09
c83332_g3	zinc finger MYM-type 1-like	66	0	-9.048	-0.075269	8.737e-11	2.932e-09
c88224_g7	RNA-directed DNA polymerase (Reverse transcriptase)///non-LTR retroelement reverse transcriptase	66	0	-9.048	-0.075269	8.737e-11	2.932e-09
c94934_g2	heat shock cognate 70 kDa 2	66	0	-9.048	-0.075269	8.737e-11	2.932e-09
c85098_g5	---NA---	91	2	-5.425	0.39542	9.601e-11	3.217e-09
c75091_g8	---NA---	699	65	-3.427	3.38063	9.683e-11	3.24e-09
c84626_g1	RNA polymerase II C-terminal domain phosphatase-like 4 isoform X2	3	102	5.028	0.562122	1e-10	3.341e-09
c82322_g1	protease Do-like 14 isoform X2///protease Do-like 14 isoform X1///protease Do-like 14	2253.21	231	-3.288	5.07658	1.055e-10	3.518e-09
c82927_g2	ribonuclease H At1g65750	0	65	9.024	-0.097456	1.079e-10	3.588e-09
c86863_g1	cytochrome P450 734A1-like	0	65	9.024	-0.097456	1.079e-10	3.588e-09
c91088_g1	uncharacterized LOC100275466	2230	230	-3.279	5.06247	1.165e-10	3.866e-09
c79658_g12	retroelement pol poly	6	132	4.429	0.943652	1.226e-10	4.063e-09
c101485_g1	retroelement pol poly -like	64	0	-9.004	-0.117098	1.336e-10	4.407e-09
c58419_g1	disease resistance RGA2-like	64	0	-9.004	-0.117098	1.336e-10	4.407e-09
c73590_g3	wall-associated receptor kinase-like 22 isoform X1	64	0	-9.004	-0.117098	1.336e-10	4.407e-09
c66638_g1	auxin-responsive family	110	4	-4.741	0.678175	1.462e-10	4.815e-09
c82246_g9	Transposon TX1 149 kDa	198	13	-3.918	1.54379	1.547e-10	5.088e-09
c103222_g1	hypothetical protein SOVF_194570	63	0	-8.981	-0.138476	1.658e-10	5.435e-09
c78346_g4	PREDICTED: uncharacterized protein LOC104894399	63	0	-8.981	-0.138476	1.658e-10	5.435e-09
c76325_g3	auxin-responsive IAA4-like	9	157.5	4.108	1.20752	1.978e-10	6.473e-09
c83136_g3	prolyl endopeptidase-like	139	1338	3.263	4.32615	2.015e-10	6.583e-09
c79330_g6	zinc finger MYM-type 1-like	62	0	-8.958	-0.160176	2.063e-10	6.708e-09
c81359_g11	polypepetide with reverse transcriptase and R domains	62	0	-8.958	-0.160176	2.063e-10	6.708e-09
c87975_g2	indole-3-acetic acid-amido synthetase	0	62	8.956	-0.161573	2.063e-10	6.708e-09
c91265_g6	receptor 12	10	166	4.034	1.28574	2.08e-10	6.743e-09
c93355_g2	cytochrome P450 76AD1	166	10	-4.039	1.28743	2.08e-10	6.743e-09
c94947_g1	Fgenesh 35	74	1	-6.044	0.099245	2.431e-10	7.871e-09
c77826_g4	wound stress precursor	238	18	-3.718	1.81797	2.472e-10	7.991e-09
c94720_g3	---NA---	310	26	-3.572	2.20501	2.551e-10	8.233e-09
c71462_g1	POLX_TOBAC ame: Full=Retrovirus-related Pol poly from transposon TNT 1-94 Includes: ame: Full=Protease Includes: ame: Full=Reverse transcriptase Includes: ame: Full=Endonuclease	61	0	-8.935	-0.182207	2.572e-10	8.275e-09
c89893_g3	disease resistance RGA2-like	0	61	8.932	-0.183595	2.572e-10	8.275e-09
c95064_g1	hypothetical protein SOVF_178770	95	3	-4.93	0.46793	2.829e-10	9.089e-09
c92400_g1	cold shock 1///formin 2	1314	140	-3.232	4.30544	2.93e-10	9.398e-09
c87501_g1	flavonoid 3 -hydroxylase	377	3388	3.165	5.67375	3.194e-10	1.023e-08
c73102_g2	Retrovirus-related Pol poly from transposon TNT 1-94	0	60	8.909	-0.205958	3.215e-10	1.028e-08
c93671_g6	PREDICTED: uncharacterized protein LOC104813376///---NA---	114	5	-4.479	0.738044	3.261e-10	1.041e-08
c58376_g2	COBRA 4	94	3	-4.915	0.453713	3.297e-10	1.051e-08
c87025_g1	phosphate metabolism 8	1597	174	-3.2	4.58927	3.46e-10	1.102e-08
c87065_g3	ROOT HAIR DEFECTIVE 3-like	214	16	-3.733	1.66596	3.707e-10	1.178e-08
c86332_g7	hypothetical protein SOVF_085450	603	5326	3.14	6.32833	3.734e-10	1.185e-08
c49766_g2	PREDICTED: uncharacterized protein LOC105967929	59	0	-8.887	-0.227305	4.029e-10	1.275e-08
c76684_g2	---NA---	59	0	-8.887	-0.227305	4.029e-10	1.275e-08
c68848_g1	---NA---	1	71	5.98	0.041938	4.327e-10	1.367e-08
c80147_g6	hypothetical protein VITISV_041217///PREDICTED: uncharacterized protein LOC104878368///Retrovirus-related Pol poly from transposon TNT 1-94	92	3	-4.884	0.424852	4.493e-10	1.414e-08
c81223_g1	serine threonine- phosphatase 6 regulatory ankyrin repeat subunit A-like isoform X1	6	121	4.303	0.827351	4.494e-10	1.414e-08
c89284_g4	PREDICTED: uncharacterized protein LOC104907268	3	92	4.879	0.423323	4.493e-10	1.414e-08
c80587_g2	cytosolic sulfotransferase 5-like///cytosolic sulfotransferase 15-like	78	747	3.255	3.48904	4.658e-10	1.463e-08
c92986_g3	pentatricopeptide repeat-containing At2g44880	14	193	3.771	1.51498	4.714e-10	1.478e-08
c75048_g1	60S ribosomal L9	58	0	-8.862	-0.250393	5.062e-10	1.58e-08
c80195_g3	DNA-directed RNA polymerase mitochondrial///DNA-directed RNA polymerase mitochondrial-like	0	58	8.86	-0.251751	5.062e-10	1.58e-08
c88230_g3	hypothetical protein SOVF_163360	58	0	-8.862	-0.250393	5.062e-10	1.58e-08
c67597_g1	PREDICTED: uncharacterized protein LOC104883431	1	70	5.96	0.022833	5.263e-10	1.638e-08
c69030_g3	WUSCHEL-like	1	70	5.96	0.022833	5.263e-10	1.638e-08
c83701_g1	A Chain The Angstroms Structure Of Pokeweed Antiviral///RIPS_PHYAM ame: Full=Antiviral S ame: Full=PAP-S ame: Full=Ribosome-inactivating ame: Full=rRNA N-glycosidase///RIPLY_SILCH ame: Full=Ribosome-inactivating lychnin///antiviral I-like///ribosome-inactivating lychnin-like///ribosome-inactivating PD-L3 PD-L4-like///RIP2_PHYAM ame: Full=Antiviral 2 ame: Full=PAP-II ame: Full=Ribosome-inactivatin…	1696	192	-3.145	4.68136	5.915e-10	1.838e-08
c63243_g1	lysosomal Pro-X carboxypeptidase-like isoform X1	57	0	-8.837	-0.273858	6.376e-10	1.967e-08
c69776_g1	mechanosensitive ion channel 10-like	0	57	8.835	-0.275205	6.376e-10	1.967e-08
c74321_g2	F-box LRR-repeat 23	57	0	-8.837	-0.273858	6.376e-10	1.967e-08
c75937_g4	mechanosensitive ion channel 9-like isoform X1	0	57	8.835	-0.275205	6.376e-10	1.967e-08
c91793_g2	cysteine--tRNA cytoplasmic isoform X2	57	0	-8.837	-0.273858	6.376e-10	1.967e-08
c92446_g1	S28541 rRNA N-glycosidase (EC ) (clone G-4) - common soapwort (fragment)	796	86	-3.211	3.58681	6.581e-10	2.027e-08
c74305_g3	mediator of RNA polymerase II transcription subunit 25 isoform X2///mediator of RNA polymerase II transcription subunit 25-like isoform X2///mediator of RNA polymerase II transcription subunit 25 isoform X1	342	32	-3.415	2.35786	6.755e-10	2.078e-08
c84925_g2	ABC transporter G family member 11-like	291	26	-3.481	2.12204	6.818e-10	2.094e-08
c78344_g1	PREDICTED: uncharacterized protein LOC104896381///PREDICTED: uncharacterized protein LOC104896428///proline-rich 36-like///PREDICTED: uncharacterized protein LOC104906887	126	7	-4.148	0.893566	7.405e-10	2.271e-08
c91775_g1	probable indole-3-acetic acid-amido synthetase	1	68	5.918	-0.016152	7.834e-10	2.399e-08
c77874_g3	remorin family	98	4	-4.575	0.523421	7.886e-10	2.412e-08
c73453_g1	ethylene-responsive transcription factor ERF119-like///ethylene-responsive transcription factor WIN1	56	0	-8.812	-0.297709	8.054e-10	2.459e-08
c71935_g1	universal stress A	133	8	-4.037	0.975447	9.173e-10	2.797e-08
c84094_g3	probable LRR receptor-like serine threonine- kinase At3g47570	67	1	-5.901	-0.03464	9.586e-10	2.919e-08
c72977_g11	copia isoform X1	0	55	8.783	-0.323289	1.02e-09	3.088e-08
c79170_g12	disease resistance At4g27190-like isoform X1	55	0	-8.786	-0.321962	1.02e-09	3.088e-08
c82927_g6	hypothetical protein SOVF_187600	55	0	-8.786	-0.321962	1.02e-09	3.088e-08
c88922_g5	anthocyanidin 3-O-glucosyltransferase 7-like	0	55	8.783	-0.323289	1.02e-09	3.088e-08
c75476_g5	2-phytyl-1,4-beta-naphthoquinone chloroplastic	953	108	-3.142	3.85228	1.031e-09	3.116e-08
c91539_g3	ATP-dependent DNA helicase PIF1-like	77	2	-5.184	0.170499	1.034e-09	3.122e-08
c71489_g1	peptidyl-prolyl cis-trans FKBP-type	258	23	-3.483	1.95041	1.058e-09	3.19e-08
c68300_g2	organ-specific S2-like	191	15	-3.662	1.50982	1.089e-09	3.278e-08
c76197_g2	late embryogenesis abundant D-34-like	1094	126	-3.119	4.05303	1.119e-09	3.362e-08
c84732_g1	transmembrane 45B-like	199	16	-3.629	1.57036	1.12e-09	3.362e-08
c85519_g1	G-type lectin S-receptor-like serine threonine- kinase At1g11300///G-type lectin S-receptor-like serine threonine- kinase SD1-13///G-type lectin S-receptor-like serine threonine- kinase At1g11330	60	558	3.212	3.0746	1.16e-09	3.478e-08
c87470_g2	PREDICTED: uncharacterized protein LOC105435721 isoform X1	66	1	-5.879	-0.054822	1.175e-09	3.517e-08
c85083_g1	receptor kinase CLAVATA1-like	95	4	-4.53	0.481992	1.23e-09	3.674e-08
c92323_g1	---NA---	54	0	-8.759	-0.34663	1.296e-09	3.867e-08
c89414_g1	peptidyl-prolyl cis-trans isomerase FKBP8-like	103	5	-4.333	0.602856	1.424e-09	4.243e-08
c81644_g1	protease Do-like 14 isoform X1	276	2270	3.037	5.11009	1.5e-09	4.462e-08
c83843_g2	ABA aldehyde oxidase isoform 1///abscisic-aldehyde oxidase-like isoform X1	6	111	4.179	0.712816	1.581e-09	4.697e-08
c89473_g2	hypothetical protein SOVF_138000///PREDICTED: uncharacterized protein LOC104887544 isoform X1///hypothetical protein BVRB_2g041740	153	11	-3.785	1.18786	1.632e-09	4.842e-08
c79307_g12	---NA---	53	0	-8.733	-0.371726	1.651e-09	4.871e-08
c80864_g1	sugar transport 8-like	53	0	-8.733	-0.371726	1.651e-09	4.871e-08
c85615_g3	hypothetical protein SOVF_120220///PREDICTED: uncharacterized protein LOC104892855///Ulp1 protease carboxy-terminal domain	53	0	-8.733	-0.371726	1.651e-09	4.871e-08
c93675_g3	Retrovirus-related Pol poly from transposon TNT 1-94	0	53	8.73	-0.373031	1.651e-09	4.871e-08
c77700_g2	---NA---	117	996	3.086	3.91924	1.701e-09	5.012e-08
c90831_g1	caffeic acid 3-O-methyltransferase	201	17	-3.556	1.58999	1.787e-09	5.257e-08
c83755_g3	F-box FBD LRR-repeat At1g13570///F-box FBD LRR-repeat At1g13570-like isoform X2	151	11	-3.766	1.17058	1.981e-09	5.821e-08
c72704_g1	ribonuclease 1-like	109	6	-4.157	0.690323	2.052e-09	6.021e-08
c82189_g1	anthocyanidin 3-O-glucoside 2 -O-glucosyltransferase-like	57	514	3.168	2.96126	2.074e-09	6.077e-08
c61579_g5	PIF1 DNA helicase replication A1	52	0	-8.705	-0.397267	2.11e-09	6.147e-08
c75995_g4	AC069473_8 gypsy Ty-3 retroelement poly 69905-74404	0	52	8.703	-0.398561	2.11e-09	6.147e-08
c91372_g3	sugar transport 8///sugar transport 8-like isoform X1	52	0	-8.705	-0.397267	2.11e-09	6.147e-08
c92503_g1	PREDICTED: uncharacterized protein LOC104883796	52	0	-8.705	-0.397267	2.11e-09	6.147e-08
c72746_g1	---NA---	5	100	4.286	0.562154	2.17e-09	6.313e-08
c90657_g1	probable helicase MAGATAMA 3 isoform X1///probable helicase MAGATAMA 3 isoform X2	16	190	3.557	1.50815	2.241e-09	6.511e-08
c73947_g6	A Chain Crystal Structure Of Saporin-L1 From Saponaria Officinalis///S28541 rRNA N-glycosidase (EC ) (clone G-4) - common soapwort (fragment)	149	11	-3.747	1.15309	2.41e-09	6.991e-08
c86794_g1	splicing factor 3A subunit 3-like	5	99	4.271	0.54886	2.502e-09	7.248e-08
c78271_g5	ribonuclease H At1g65750	51	0	-8.677	-0.423268	2.704e-09	7.824e-08
c73462_g1	receptor kinase///probable receptor kinase At1g67000 isoform X1	1	62	5.785	-0.13986	2.714e-09	7.841e-08
c73740_g1	cysteine-rich receptor kinase 10	71	2	-5.067	0.062222	3.142e-09	9.066e-08
c81559_g2	nuclease HARBI1	7	114	3.999	0.759741	3.161e-09	9.11e-08
c88889_g2	F-box kelch-repeat At3g06240-like///F-box At5g50220///F-box kelch-repeat At3g23880-like	3	80	4.678	0.236951	3.2e-09	9.209e-08
c88578_g1	glutamine amidotransferase	193	17	-3.498	1.53703	3.272e-09	9.403e-08
c70440_g1	AC069473_8 gypsy Ty-3 retroelement poly 69905-74404	50	0	-8.649	-0.449746	3.476e-09	9.936e-08
c75677_g1	myb-related 308	50	0	-8.649	-0.449746	3.476e-09	9.936e-08
c77722_g1	disulfide isomerase-like 1-4	50	0	-8.649	-0.449746	3.476e-09	9.936e-08
c90062_g3	NB-ARC domain disease resistance	50	0	-8.649	-0.449746	3.476e-09	9.936e-08
c84824_g2	jacalin-related lectin 3 isoform X1///jacalin-related lectin 3///pentatricopeptide repeat-containing	481	55	-3.128	2.87242	3.57e-09	1.019e-07
c85055_g1	benzyl alcohol O-benzoyltransferase-like	7	113	3.987	0.748156	3.585e-09	1.022e-07
c84160_g2	PREDICTED: uncharacterized protein LOC104894573	88	4	-4.419	0.380431	3.604e-09	1.026e-07
c84050_g3	heat shock 83///Heat shock 83	352	38	-3.21	2.41765	3.617e-09	1.028e-07
c76231_g2	disease resistance RGA2-like	3	79	4.66	0.220276	3.803e-09	1.079e-07
c69858_g2	transcription factor TGA6-like	970	121	-3.004	3.89234	4.028e-09	1.142e-07
c79477_g1	DNA ligase 1///DNA ligase 1-like	266	27	-3.297	2.0099	4.136e-09	1.171e-07
c75042_g4	glutathione S-transferase U9-like	60	1	-5.742	-0.18223	4.179e-09	1.178e-07
c76575_g4	Gag-Pol poly	1	60	5.738	-0.183572	4.179e-09	1.178e-07
c86578_g5	monothiol glutaredoxin-S1-like	1	60	5.738	-0.183572	4.179e-09	1.178e-07
c87868_g2	Myb family transcription factor At1g14600	159	13	-3.602	1.25497	4.192e-09	1.181e-07
c75325_g3	PREDICTED: uncharacterized protein LOC104884717///ribonuclease H At1g65750	95	5	-4.217	0.495917	4.466e-09	1.251e-07
c75857_g8	copia isoform X1	0	49	8.617	-0.477977	4.484e-09	1.251e-07
c76381_g4	AF525305_2 AP endonuclease reverse transcriptase	49	0	-8.62	-0.476719	4.484e-09	1.251e-07
c77226_g4	ribonuclease H At1g65750	0	49	8.617	-0.477977	4.484e-09	1.251e-07
c77920_g8	uncharacterized acetyltransferase At3g50280-like	0	49	8.617	-0.477977	4.484e-09	1.251e-07
c82525_g4	PREDICTED: uncharacterized protein LOC104892995	49	0	-8.62	-0.476719	4.484e-09	1.251e-07
c88792_g9	disease resistance RGA2-like	49	0	-8.62	-0.476719	4.484e-09	1.251e-07
c80790_g3	O-glucosyltransferase rumi homolog	9	126	3.787	0.912892	5.094e-09	1.419e-07
c89971_g2	kinase chloroplastic-like	837	105	-2.996	3.68131	5.137e-09	1.429e-07
c84401_g1	A Chain Crystal Structure Of Potato Multicystatin	11	141	3.663	1.07934	5.374e-09	1.493e-07
c82969_g1	unnamed protein product	3	77	4.623	0.186336	5.393e-09	1.497e-07
c92543_g1	AC092548_5 TNP2-like transposon///transposon En Spm sub-class	10	133	3.714	0.993618	5.544e-09	1.536e-07
c72905_g1	O-acyltransferase WSD1-like	2	68	5	0.003493	5.607e-09	1.552e-07
c65195_g2	PREDICTED: uncharacterized protein LOC104899180	48	0	-8.59	-0.504206	5.803e-09	1.591e-07
c73484_g2	serpin-ZX-like///serpin-Z2B-like isoform X2	0	48	8.588	-0.505452	5.803e-09	1.591e-07
c74677_g4	mechanosensitive ion channel 9-like isoform X1	48	0	-8.59	-0.504206	5.803e-09	1.591e-07
c76970_g1	zinc finger BED domain-containing RICESLEEPER 2-like	48	0	-8.59	-0.504206	5.803e-09	1.591e-07
c76986_g8	probable sulfate transporter	22	223	3.332	1.7539	5.786e-09	1.591e-07
c83548_g6	7-methylxanthosine synthase 1-like///salicylate carboxymethyltransferase-like	0	48	8.588	-0.505452	5.803e-09	1.591e-07
c85725_g7	PREDICTED: uncharacterized protein LOC104883796///PREDICTED: uncharacterized protein LOC104884000	48	0	-8.59	-0.504206	5.803e-09	1.591e-07
c83255_g2	BTB POZ domain-containing At2g30600	924	118	-2.97	3.82628	5.924e-09	1.622e-07
c84993_g5	---NA---	74	604	3.024	3.20748	5.931e-09	1.622e-07
c92835_g3	ABC transporter G family member 29-like	7	109	3.935	0.700861	5.975e-09	1.632e-07
c87263_g1	heat shock cognate 70 kDa 2-like	1023	132	-2.955	3.97428	6.199e-09	1.691e-07
c86148_g2	ribonuclease 1-like///intracellular ribonuclease LX-like	43	376	3.122	2.51839	6.25e-09	1.703e-07
c75845_g1	---NA---///PREDICTED: uncharacterized protein LOC104904576	162	14	-3.523	1.28739	6.378e-09	1.735e-07
c78592_g2	stem-specific TSJT1-like	9706	1338	-2.861	7.22713	6.556e-09	1.782e-07
c77920_g4	uncharacterized acetyltransferase At3g50280-like	10	131	3.693	0.973859	6.886e-09	1.869e-07
c92062_g3	anthocyanidin 3-O-glucoside 2 -O-glucosyltransferase-like	24	235	3.282	1.83282	6.918e-09	1.875e-07
c91459_g1	DNA damage-inducible 1-like///PREDICTED: uncharacterized protein LOC104883015	23	227	3.294	1.78259	7.221e-09	1.955e-07
c80865_g1	monothiol glutaredoxin-S9-like	58	480	3.044	2.87602	7.407e-09	2.002e-07
c36861_g1	PREDICTED: uncharacterized protein LOC105974514	47	0	-8.56	-0.532227	7.535e-09	2.024e-07
c69061_g1	transcription factor DYSFUNCTIONAL TAPETUM 1	0	47	8.557	-0.53346	7.535e-09	2.024e-07
c69521_g1	UPF0695 membrane YPL279C-like isoform X3///UPF0695 membrane -like	0	47	8.557	-0.53346	7.535e-09	2.024e-07
c76657_g5	retroelement pol poly	47	0	-8.56	-0.532227	7.535e-09	2.024e-07
c77220_g2	RPM1-interacting 4-like	47	0	-8.56	-0.532227	7.535e-09	2.024e-07
c75391_g1	1-aminocyclopropane-1-carboxylate synthase	551	68	-3.019	3.07869	7.618e-09	2.044e-07
c93153_g1	PREDICTED: uncharacterized protein LOC104903357	1266	168	-2.915	4.28547	7.739e-09	2.073e-07
c93937_g1	Retrovirus-related Pol poly from transposon TNT 1-94	107	7	-3.913	0.67813	7.75e-09	2.074e-07
c75580_g1	hypothetical protein BVRB_2g041740	2990	411	-2.865	5.52906	8.324e-09	2.225e-07
c91872_g1	kDa class I heat shock -like	6076	846	-2.847	6.55344	8.367e-09	2.233e-07
c77776_g1	(3S,6E)-nerolidol synthase 1-like	188	18	-3.378	1.50979	8.599e-09	2.292e-07
c76205_g1	homeobox-leucine zipper ATHB-6-like	253	27	-3.225	1.94531	8.709e-09	2.318e-07
c70385_g1	scarecrow 21	55	453	3.037	2.79387	8.843e-09	2.348e-07
c76878_g9	Retrovirus-related Pol poly from transposon TNT 1-94	7	106	3.894	0.664343	8.838e-09	2.348e-07
c78703_g1	ethylene-responsive transcription factor ABR1-like	401	48	-3.062	2.61895	9.556e-09	2.534e-07
c69204_g5	homeobox Wariai-like///ankyrin-1-like isoform X1///serine threonine- phosphatase 6 regulatory ankyrin repeat subunit B-like isoform X2	0	46	8.526	-0.562023	9.819e-09	2.591e-07
c71116_g4	---NA---	0	46	8.526	-0.562023	9.819e-09	2.591e-07
c93304_g3	PREDICTED: uncharacterized protein LOC104905670	0	46	8.526	-0.562023	9.819e-09	2.591e-07
c93675_g1	poly	0	46	8.526	-0.562023	9.819e-09	2.591e-07
c87952_g1	Rpp4 candidate R3	89	690	2.951	3.40673	1.006e-08	2.652e-07
c81841_g4	disease resistance RGA2-like///disease resistance RGA3///disease resistance RGA3 isoform X1	2	65	4.935	-0.056199	1.018e-08	2.679e-07
c78187_g6	ribonuclease H At1g65750///PREDICTED: uncharacterized protein LOC104905754///PREDICTED: uncharacterized protein LOC104896166	1	56	5.638	-0.275182	1.02e-08	2.682e-07
c89241_g7	RING-H2 finger ATL21A	207	21	-3.296	1.65353	1.048e-08	2.752e-07
c80172_g3	F-box At1g49610///F-box LRR-repeat At3g18150	97	6	-3.989	0.536938	1.058e-08	2.775e-07
c80534_g5	cysteine--tRNA cytoplasmic isoform X1	73	3	-4.551	0.117356	1.105e-08	2.895e-07
c88453_g6	PREDICTED: uncharacterized protein LOC104899184	111	8	-3.776	0.738	1.228e-08	3.213e-07
c70395_g2	F-box At5g07610-like	64	2	-4.918	-0.075313	1.247e-08	3.257e-07
c43478_g1	cysteine-rich receptor kinase 10	0	45	8.495	-0.591163	1.284e-08	3.325e-07
c69371_g1	copia isoform X1	45	0	-8.497	-0.589955	1.284e-08	3.325e-07
c72542_g3	retrotransposon unclassified	45	0	-8.497	-0.589955	1.284e-08	3.325e-07
c79170_g9	Cc-nbs-lrr resistance	45	0	-8.497	-0.589955	1.284e-08	3.325e-07
c80287_g4	AP-2 complex subunit mu-like	0	45.07	8.497	-0.589104	1.284e-08	3.325e-07
c86432_g10	LINE-type retrotransposon LIb DNA	45	0	-8.497	-0.589955	1.284e-08	3.325e-07
c88922_g1	UDP-glucose:flavonol 3-O-glucosyltransferase	0	45	8.495	-0.591163	1.284e-08	3.325e-07
c85736_g1	NRT1 PTR FAMILY -like	45	371	3.038	2.50813	1.349e-08	3.489e-07
c85540_g1	unnamed protein product///PREDICTED: uncharacterized protein LOC104896429	51	412	3.009	2.66116	1.38e-08	3.566e-07
c77994_g2	PREDICTED: uncharacterized protein LOC104891516///PREDICTED: uncharacterized protein LOC104896209	18	181	3.319	1.45927	1.489e-08	3.843e-07
c76902_g7	cytochrome P450 76A2-like	63	2	-4.895	-0.096076	1.53e-08	3.938e-07
c82202_g3	methylsterol monooxygenase 2-2	2.03	63	4.87	-0.096785	1.53e-08	3.938e-07
c90483_g2	ABC transporter A family member 2///ABC transporter A family member 2-like	156	1130	2.853	4.12701	1.532e-08	3.938e-07
c80913_g1	transcription factor HBP-1b(c38)-like	758	102	-2.894	3.55049	1.535e-08	3.941e-07
c94213_g2	hypothetical protein VITISV_008801	4	79	4.259	0.23697	1.57e-08	4.027e-07
c81469_g1	flavonol synthase	25	229	3.187	1.80514	1.586e-08	4.062e-07
c71477_g6	zinc finger MYM-type 1-like	208	22	-3.236	1.66591	1.602e-08	4.099e-07
c83309_g2	cytochrome b561 and DOMON domain-containing At5g47530-like	20	194	3.268	1.56211	1.61e-08	4.113e-07
c74045_g2	eukaryotic peptide chain release factor GTP-binding subunit ERF3A-like isoform X3	1	54	5.586	-0.323265	1.619e-08	4.131e-07
c74107_g3	Retrotransposon gag///---NA---	0	44	8.462	-0.620903	1.685e-08	4.28e-07
c78521_g1	acyl- thioesterase 2///acyl- thioesterase 2-like	0	44	8.462	-0.620903	1.685e-08	4.28e-07
c88220_g1	replication A 70 kDa DNA-binding subunit E-like isoform X1///replication A 70 kDa DNA-binding subunit C-like///replication factor-A carboxy-terminal domain	44	0	-8.465	-0.619709	1.685e-08	4.28e-07
c93697_g1	polyamine oxidase-like	44	0	-8.465	-0.619709	1.685e-08	4.28e-07
c77552_g3	cytochrome P450 89A2-like	15	158	3.384	1.26155	1.754e-08	4.448e-07
c72357_g2	NAC transcription factor 25-like	108	8	-3.737	0.702368	1.797e-08	4.553e-07
c73707_g1	auxin-binding ABP19a-like	115	9	-3.66	0.795485	1.847e-08	4.675e-07
c92875_g3	serine threonine- phosphatase 7 long form homolog	233	26	-3.16	1.83447	1.902e-08	4.808e-07
c80566_g4	kunitz-type trypsin inhibitor alpha chain-like	198	1397	2.816	4.43681	1.909e-08	4.818e-07
c88625_g1	65-kDa microtubule-associated 3-like	107	8	-3.723	0.690293	2.043e-08	5.152e-07
c78324_g2	glycerol-3-phosphate dehydrogenase	114	9	-3.647	0.784167	2.085e-08	5.252e-07
c90150_g3	F-box kelch-repeat At3g23880-like	265	31	-3.093	2.02437	2.144e-08	5.394e-07
c70454_g1	PREDICTED: uncharacterized protein LOC104884660///Retrotransposon gag	0	43	8.429	-0.65127	2.22e-08	5.538e-07
c76854_g5	PREDICTED: uncharacterized protein LOC104888712	0	43	8.429	-0.65127	2.22e-08	5.538e-07
c79194_g4	wall-associated receptor kinase-like 22 isoform X1	0	43	8.429	-0.65127	2.22e-08	5.538e-07
c81522_g1	hypothetical protein TRIUR3_09150	0	43	8.429	-0.65127	2.22e-08	5.538e-07
c86579_g1	peptidyl-prolyl cis-trans isomerase FKBP65-like///peptidyl-prolyl cis-trans isomerase PASTICCINO1	24	217	3.168	1.73056	2.213e-08	5.538e-07
c89198_g7	transposon En Spm sub-class	0	43	8.429	-0.65127	2.22e-08	5.538e-07
c90235_g2	---NA---	43	0	-8.432	-0.65009	2.22e-08	5.538e-07
c85804_g4	70 kDa peptidyl-prolyl isomerase-like isoform X2	210	23	-3.186	1.68428	2.244e-08	5.591e-07
c74481_g1	E3 ubiquitin- ligase SINA-like 11	160	1122	2.807	4.12254	2.441e-08	6.073e-07
c72065_g1	chalcone synthase	45	356	2.978	2.45567	2.477e-08	6.157e-07
c84497_g2	PREDICTED: uncharacterized protein LOC104882998	1	52	5.532	-0.373007	2.596e-08	6.437e-07
c95031_g3	hypothetical protein SOVF_045340 isoform B	52	1	-5.536	-0.371751	2.596e-08	6.437e-07
c75484_g1	translation factor SUI1 homolog	17	167	3.284	1.34854	2.666e-08	6.604e-07
c79999_g2	HAPLESS 2	19	180	3.233	1.45928	2.783e-08	6.885e-07
c72404_g2	MLP 31	200	22	-3.18	1.61571	2.817e-08	6.961e-07
c73123_g1	ankyrin repeat-containing At3g12360-like	5	83	4.017	0.317588	2.823e-08	6.967e-07
c87083_g2	transcription factor bHLH91-like	2	60	4.82	-0.161528	2.864e-08	7.061e-07
c54653_g1	PREDICTED: uncharacterized protein LOC100251726	0	42	8.395	-0.68229	2.936e-08	7.188e-07
c70572_g4	disease resistance RGA3	42	0	-8.398	-0.681124	2.936e-08	7.188e-07
c74533_g5	PREDICTED: uncharacterized protein LOC104900422	0	42	8.395	-0.68229	2.936e-08	7.188e-07
c81062_g4	PREDICTED: uncharacterized protein LOC106296332 isoform X1	42	0	-8.398	-0.681124	2.936e-08	7.188e-07
c83413_g4	probable serine threonine- kinase NAK	42	0	-8.398	-0.681124	2.936e-08	7.188e-07
c90062_g10	disease resistance (CC-NBS-LRR class) family	42	0	-8.398	-0.681124	2.936e-08	7.188e-07
c82416_g1	DEAD-box ATP-dependent RNA helicase 16	1488	9777	2.714	7.25393	3.084e-08	7.541e-07
c84027_g1	F-box family///F-box CPR30-like	2	59	4.796	-0.183549	3.546e-08	8.659e-07
c79447_g1	anthranilate chloroplastic	4	74	4.165	0.151598	3.732e-08	9.103e-07
c113493_g1	PREDICTED: uncharacterized protein LOC104903416	0	41	8.361	-0.713992	3.899e-08	9.434e-07
c64768_g4	PREDICTED: uncharacterized protein LOC104899550	0	41	8.361	-0.713992	3.899e-08	9.434e-07
c77073_g9	hypothetical protein SOVF_078610	0	41	8.361	-0.713992	3.899e-08	9.434e-07
c78442_g7	PREDICTED: uncharacterized protein LOC104905511	41	0	-8.363	-0.71284	3.899e-08	9.434e-07
c79869_g4	replication A 70 kDa DNA-binding subunit D-like	41	0	-8.363	-0.71284	3.899e-08	9.434e-07
c80076_g12	PREDICTED: uncharacterized protein LOC104891516///AF525305_2 AP endonuclease reverse transcriptase	41	0	-8.363	-0.71284	3.899e-08	9.434e-07
c95618_g1	ribonuclease H At1g65750	0	41	8.361	-0.713992	3.899e-08	9.434e-07
c66075_g1	flavonoid 3 ,5 -methyltransferase-like	15	149	3.299	1.18628	4.01e-08	9.693e-07
c94685_g3	cellulose synthase G2	473	65	-2.863	2.87772	4.061e-08	9.804e-07
c80852_g4	RING-finger domain-containing///NEP1-interacting -like 1	11	122	3.454	0.892015	4.132e-08	9.964e-07
c86773_g4	fatty acid amide hydrolase-like isoform X1	19	175	3.192	1.42331	4.148e-08	9.989e-07
c93302_g3	---NA---	201	23	-3.123	1.62841	4.197e-08	1.01e-06
c80659_g5	hypothetical protein SOVF_170270///hypothetical protein BVRB_7g177090 isoform B///Sieve element occlusion b	377	2471	2.71	5.27163	4.217e-08	1.013e-06
c73708_g1	plant T31B5-30	10	115	3.505	0.805217	4.259e-08	1.022e-06
c74531_g5	MLP 43	2	58	4.771	-0.205912	4.399e-08	1.055e-06
c67439_g1	polyadenylate-binding 3	7	94	3.721	0.50826	4.579e-08	1.097e-06
c86775_g1	Plasma membrane ATPase 1///H+-ATPase family	86	603	2.806	3.2306	4.588e-08	1.098e-06
c72959_g3	methionine gamma-lyase-like	626	90	-2.799	3.28743	4.751e-08	1.135e-06
c77370_g1	probable LRR receptor-like serine threonine- kinase At1g53430	107	9	-3.556	0.702353	4.971e-08	1.186e-06
c71246_g7	FBD-associated F-box At2g26860-like	0	40	8.325	-0.746406	5.199e-08	1.23e-06
c73376_g4	F-box kelch-repeat At4g39753-like	40	0	-8.328	-0.745269	5.199e-08	1.23e-06
c81599_g3	aspartic ase nepenthesin-1-like	40	0	-8.328	-0.745269	5.199e-08	1.23e-06
c81812_g8	Metacaspase 9	40	0	-8.328	-0.745269	5.199e-08	1.23e-06
c82525_g1	PREDICTED: uncharacterized protein LOC104891166	40	0	-8.328	-0.745269	5.199e-08	1.23e-06
c83011_g3	ribonuclease H At1g65750-like	40	0	-8.328	-0.745269	5.199e-08	1.23e-06
c87565_g1	non-specific phospholipase C4-like	40	0	-8.328	-0.745269	5.199e-08	1.23e-06
c95570_g1	F-box LRR-repeat 13	40	0	-8.328	-0.745269	5.199e-08	1.23e-06
c95017_g2	peroxidase 12-like	1239	188	-2.722	4.27839	5.317e-08	1.256e-06
c84046_g9	flavanone 3-dioxygenase-like	1	49	5.446	-0.450991	5.386e-08	1.271e-06
c95300_g2	PREDICTED: uncharacterized protein LOC104899363	2	57	4.746	-0.228626	5.47e-08	1.289e-06
c87410_g5	cytochrome b-c1 complex subunit 8-like	3406	536	-2.67	5.74177	5.873e-08	1.383e-06
c73069_g2	tetratricopeptide repeat 28-like	119	799	2.744	3.64251	6.053e-08	1.424e-06
c88132_g6	sister chromatid cohesion 1 1	6	85	3.794	0.363888	6.292e-08	1.478e-06
c78040_g3	PREDICTED: uncharacterized protein LOC104893557	5	78	3.928	0.236988	6.408e-08	1.504e-06
c83847_g2	CYC 1	439	62	-2.824	2.7757	6.548e-08	1.535e-06
c69793_g1	PREDICTED: uncharacterized protein LOC100263724	8	98	3.592	0.575375	6.737e-08	1.577e-06
c76161_g2	disease resistance RGA1 isoform X1///disease resistance RGA2-like	1	48	5.417	-0.477952	6.911e-08	1.616e-06
c73139_g4	ankyrin repeat-containing At5g02620-like	0	39	8.289	-0.779565	6.961e-08	1.621e-06
c74272_g7	poly	39	0	-8.291	-0.778443	6.961e-08	1.621e-06
c77641_g8	hypothetical protein BVRB_8g200520	0	39	8.289	-0.779565	6.961e-08	1.621e-06
c84647_g5	Cysteine ase EP-B 1	0	39	8.289	-0.779565	6.961e-08	1.621e-06
c88372_g5	F-box kelch-repeat At4g12810	32	250	2.958	1.9538	7.118e-08	1.655e-06
c79957_g1	BRO1 domain-containing BROX homolog isoform X2	130	13	-3.312	0.995151	7.233e-08	1.68e-06
c83500_g5	hypothetical protein	541	79	-2.776	3.08096	7.265e-08	1.686e-06
c76657_g4	retroelement pol poly -like///retroelement pol poly	63	3	-4.339	-0.075334	7.48e-08	1.732e-06
c82957_g4	Retrovirus-related Pol poly from transposon TNT 1-94	3	63	4.334	-0.076637	7.48e-08	1.732e-06
c61909_g1	BURP domain-containing precursor	31	242	2.957	1.90768	7.883e-08	1.823e-06
c84391_g1	---NA---	198	24	-3.04	1.61569	8.138e-08	1.88e-06
c95159_g2	disease resistance RGA2-like	154	17	-3.172	1.2467	8.285e-08	1.912e-06
c76620_g1	F-box PP2-B15-like	47	1	-5.391	-0.504232	8.895e-08	2.051e-06
c90198_g3	FAR1-RELATED SEQUENCE 5-like	13	128	3.285	0.973898	8.936e-08	2.058e-06
c76524_g4	cysteine ase 15A	344	48	-2.84	2.4249	8.97e-08	2.063e-06
c88953_g2	pumilio homolog 5 isoform X3///pumilio homolog 5	115	11	-3.374	0.81783	9.241e-08	2.123e-06
c78426_g9	F-box LRR-repeat At3g59190-like	38	0	-8.254	-0.812398	9.362e-08	2.139e-06
c79081_g6	Retrovirus-related Pol poly from transposon TNT 1-94	0	38	8.251	-0.813505	9.362e-08	2.139e-06
c81600_g1	feruloyl ortho-hydroxylase 1-like	0	38	8.251	-0.813505	9.362e-08	2.139e-06
c83808_g4	RNA-directed DNA polymerase///ribonuclease H At1g65750///PREDICTED: uncharacterized protein LOC106420321///non-LTR retroelement reverse transcriptase	38	0	-8.254	-0.812398	9.362e-08	2.139e-06
c84228_g3	AC079604_5 copia-type	38	0	-8.254	-0.812398	9.362e-08	2.139e-06
c79605_g2	palmitoyl-monogalactosyldiacylglycerol delta-7 desaturase///palmitoyl-monogalactosyldiacylglycerol delta-7 chloroplastic///palmitoyl-monogalactosyldiacylglycerol delta-7 chloroplastic-like///Palmitoyl-monogalactosyldiacylglycerol delta-7 chloroplastic	9	102	3.482	0.639505	9.461e-08	2.16e-06
c89994_g6	protease Do-like 14 isoform X1///calmodulin-binding 25///calmodulin-binding 25-like	1535	9335	2.602	7.20247	9.689e-08	2.209e-06
c72014_g3	hypothetical protein SOVF_208870	54	2	-4.673	-0.297757	1.067e-07	2.43e-06
c84784_g2	wall-associated receptor kinase-like 22 isoform X1	83	550	2.724	3.10906	1.091e-07	2.481e-06
c71229_g2	pre-mRNA-splicing factor SLU7-like	61	3	-4.292	-0.117165	1.121e-07	2.548e-06
c74599_g8	retroelement pol poly	46	1	-5.36	-0.532253	1.149e-07	2.608e-06
c77889_g1	cytochrome P450 734A1-like	11	113	3.344	0.794006	1.17e-07	2.65e-06
c87955_g4	PREDICTED: uncharacterized protein LOC104891244///PREDICTED: uncharacterized protein LOC104886331	11	113	3.344	0.794006	1.17e-07	2.65e-06
c83082_g1	NAC domain-containing 89-like isoform X1///NAC domain-containing 89	319	45	-2.825	2.31909	1.202e-07	2.72e-06
c87998_g1	boron transporter 4-like	47	330	2.806	2.36758	1.254e-07	2.835e-06
c45089_g1	---NA---	37	0	-8.216	-0.847171	1.265e-07	2.838e-06
c78550_g5	MATE efflux family 5-like	37	0	-8.216	-0.847171	1.265e-07	2.838e-06
c81476_g5	retrotransposon unclassified	37	0	-8.216	-0.847171	1.265e-07	2.838e-06
c84858_g4	ribonuclease P subunit p25	32	240	2.9	1.90247	1.265e-07	2.838e-06
c88624_g1	PREDICTED: uncharacterized protein LOC104883979	0	37	8.213	-0.848262	1.265e-07	2.838e-06
c88644_g3	1-aminocyclopropane-1-carboxylate oxidase homolog 4-like	210	27	-2.956	1.7084	1.259e-07	2.838e-06
c91018_g1	52 kDa repressor of the inhibitor of the kinase-like	0	37	8.213	-0.848262	1.265e-07	2.838e-06
c82734_g6	heat shock///heat shock cognate 70 kDa 2///heat shock cognate 70 kDa 2-like	7	87	3.61	0.408749	1.274e-07	2.856e-06
c87047_g2	PREDICTED: uncharacterized protein LOC104906597	311	44	-2.82	2.28337	1.316e-07	2.946e-06
c92839_g1	F-box FBD LRR-repeat At5g56420-like	20	167	3.051	1.3714	1.328e-07	2.971e-06
c87138_g3	Zinc CCHC-type///ribonuclease H At1g65750-like	2	53	4.642	-0.323241	1.34e-07	2.993e-06
c94994_g1	LRR receptor-like serine threonine- kinase GSO1	143	898	2.647	3.82319	1.35e-07	3.012e-06
c76231_g1	disease resistance RGA2-like	3	60	4.264	-0.139816	1.377e-07	3.07e-06
c73494_g4	AF525305_2 AP endonuclease reverse transcriptase///PREDICTED: uncharacterized protein LOC104899180	111	11	-3.323	0.772731	1.485e-07	3.307e-06
c80188_g6	poly///retrotransposon like	45	1	-5.328	-0.560829	1.488e-07	3.31e-06
c74115_g2	ABC transporter B family member 2-like	953	154	-2.631	3.9132	1.523e-07	3.385e-06
c76901_g2	ribonuclease H At1g65750	122.85	13.14	-3.215	0.924639	1.531e-07	3.398e-06
c86696_g2	probable pyruvate cytosolic isozyme	140.78	16.25	-3.108	1.12666	1.562e-07	3.464e-06
c73801_g5	non-LTR retroelement reverse transcriptase///PREDICTED: uncharacterized protein LOC104884000	21	171	3.016	1.40868	1.564e-07	3.465e-06
c82280_g2	Retrovirus-related Pol poly from transposon TNT 1-94	75	489	2.7	2.94367	1.581e-07	3.498e-06
c77457_g5	F-box SKIP23-like	224	30	-2.898	1.80674	1.616e-07	3.573e-06
c92306_g1	F-box kelch-repeat At3g23880-like isoform X1	1163	191	-2.608	4.20283	1.66e-07	3.666e-06
c80712_g1	transcription factor FER-LIKE IRON DEFICIENCY-INDUCED TRANSCRIPTION FACTOR	52	2	-4.619	-0.346679	1.687e-07	3.717e-06
c86629_g2	peroxisomal adenine nucleotide carrier 1-like	2	52	4.614	-0.347897	1.687e-07	3.717e-06
c70043_g4	probable xyloglucan endotransglucosylase hydrolase 23	59	3	-4.244	-0.160244	1.694e-07	3.726e-06
c87631_g6	EGF domain-specific O-linked N-acetylglucosamine transferase-like///EGF domain-specific O-linked N-acetylglucosamine transferase	3	59	4.24	-0.161505	1.694e-07	3.726e-06
c24444_g1	---NA---	36	0	-8.176	-0.882803	1.716e-07	3.758e-06
c61976_g1	hypothetical protein SOVF_178770	36	0	-8.176	-0.882803	1.716e-07	3.758e-06
c73660_g4	disease resistance At4g27190-like	36	0	-8.176	-0.882803	1.716e-07	3.758e-06
c78353_g3	disease resistance	0	35.63	8.159	-0.897282	1.716e-07	3.758e-06
c88812_g1	PREDICTED: uncharacterized protein LOC104218728///PREDICTED: uncharacterized protein LOC104244604	175	22	-2.987	1.44654	1.824e-07	3.99e-06
c81464_g1	mannose glucose-specific lectin-like///mannose glucose-specific lectin-like isoform X1	6785	1168	-2.541	6.75358	1.832e-07	4.004e-06
c85916_g3	hypothetical protein SOVF_135360	74	478	2.687	2.91286	1.84e-07	4.016e-06
c78557_g1	F-box kelch-repeat At1g80440-like///F-box kelch-repeat	1	44	5.291	-0.591136	1.934e-07	4.217e-06
c75995_g8	AC069473_8 gypsy Ty-3 retroelement poly 69905-74404	7	84	3.559	0.363906	2.007e-07	4.368e-06
c81922_g2	PREDICTED: uncharacterized protein LOC105638918	7	84	3.559	0.363906	2.007e-07	4.368e-06
c61049_g1	kunitz-type trypsin inhibitor alpha chain-like	8	90	3.469	0.466467	2.066e-07	4.492e-06
c91215_g3	E3 ubiquitin ligase RIE1-like	58	3	-4.22	-0.182275	2.09e-07	4.538e-06
c88698_g10	NAC domain-containing 100	266	38	-2.806	2.0623	2.116e-07	4.59e-06
c74911_g1	Glutamate decarboxylase///glutamate decarboxylase-like	71	5	-3.797	0.117316	2.138e-07	4.634e-06
c72900_g1	---NA---///LRR receptor-like serine threonine- kinase GSO2	77	6	-3.657	0.238342	2.262e-07	4.896e-06
c89435_g1	receptor 12///verticillium wilt susceptible	22	172	2.957	1.42334	2.309e-07	4.993e-06
c57140_g2	hypothetical protein BVRB_5g117090///retroelement pol poly -like	35	0	-8.136	-0.919338	2.34e-07	5.036e-06
c71966_g5	retrotransposon unclassified///uncharacterized mitochondrial g00810-like///PREDICTED: uncharacterized protein LOC104884394///copia isoform X1	0	35	8.133	-0.920396	2.34e-07	5.036e-06
c77176_g1	NRT1 PTR FAMILY -like	35	0	-8.136	-0.919338	2.34e-07	5.036e-06
c90551_g4	mildew resistance locus o 15	35	0	-8.136	-0.919338	2.34e-07	5.036e-06
c94853_g1	ankyrin repeat-containing At5g02620-like	35	0	-8.136	-0.919338	2.34e-07	5.036e-06
c88138_g2	stromal 70 kDa heat shock-related chloroplastic///stromal 70 kDa heat shock-related chloroplastic-like///heat shock 70 kDa chloroplastic	1732	296	-2.551	4.78424	2.359e-07	5.07e-06
c83819_g1	cytochrome P450 86B1-like	86	538	2.641	3.08854	2.362e-07	5.072e-06
c90229_g1	probable E3 ubiquitin- ligase HIP1 isoform X1///E3 ubiquitin ligase BIG BROTHER-related-like	12	113	3.219	0.805245	2.398e-07	5.143e-06
c94567_g1	hypothetical protein	95	9	-3.384	0.550313	2.411e-07	5.165e-06
c94593_g2	Heat shock cognate 70 kDa///heat shock 70 kDa cognate 1-like	473	75	-2.657	2.90406	2.529e-07	5.413e-06
c81012_g2	F-box LRR-repeat At4g15060	602	98	-2.62	3.25497	2.615e-07	5.593e-06
c87514_g6	Inter-alpha-trypsin inhibitor heavy chain H3	6	76	3.633	0.220333	2.669e-07	5.702e-06
c73590_g5	wall-associated receptor kinase-like 16///wall-associated receptor kinase-like 22 isoform X1	50	2	-4.562	-0.397317	2.694e-07	5.744e-06
c91664_g3	probable LRR receptor-like serine threonine- kinase At3g47570	2	50	4.558	-0.398511	2.694e-07	5.744e-06
c89429_g1	---NA---	82	7.37	-3.456	0.340287	2.733e-07	5.82e-06
c78350_g1	F-box SKIP23-like///PREDICTED: uncharacterized protein LOC104908911///PREDICTED: uncharacterized protein LOC104886331///PREDICTED: uncharacterized protein LOC104891244	8	88	3.437	0.437905	2.761e-07	5.874e-06
c78537_g2	acyl carrier mitochondrial-like	102	623	2.607	3.3037	2.775e-07	5.898e-06
c77856_g3	peptidyl-prolyl cis-trans isomerase FKBP62-like	214	1244	2.536	4.30764	3.08e-07	6.54e-06
c87990_g1	PREDICTED: uncharacterized protein LOC104896314///hypothetical protein SOVF_210800///DUF1262 family	410	65	-2.657	2.69941	3.122e-07	6.623e-06
c43146_g1	PREDICTED: uncharacterized protein LOC104891629	0	34	8.092	-0.957862	3.207e-07	6.748e-06
c68569_g4	ribonuclease H At1g65750	0	34	8.092	-0.957862	3.207e-07	6.748e-06
c74548_g2	---NA---	34	0	-8.094	-0.956821	3.207e-07	6.748e-06
c74677_g2	mechanosensitive ion channel 10-like	34	0	-8.094	-0.956821	3.207e-07	6.748e-06
c79193_g6	FAR1-RELATED SEQUENCE 5-like	0	34	8.092	-0.957862	3.207e-07	6.748e-06
c83086_g1	serine threonine- phosphatase 7 long form homolog	34	0	-8.094	-0.956821	3.207e-07	6.748e-06
c83366_g4	oleoyl-acyl carrier thioesterase chloroplastic///oleoyl-acyl carrier thioesterase chloroplastic-like	3	56	4.164	-0.228603	3.198e-07	6.748e-06
c91032_g2	Retrovirus-related Pol poly from transposon TNT 1-94	0	34	8.092	-0.957862	3.207e-07	6.748e-06
c74781_g4	probable leucine-rich repeat receptor kinase At1g35710///LRR receptor-like serine threonine- kinase GSO1	1	42	5.224	-0.651243	3.302e-07	6.94e-06
c84050_g2	heat shock 83	49	2	-4.533	-0.423318	3.419e-07	7.179e-06
c93697_g3	ankyrin repeat-containing At3g12360-like isoform X3	7	80	3.489	0.301861	3.737e-07	7.84e-06
c92567_g1	hypothetical protein SOVF_165580	354	56	-2.66	2.489	3.882e-07	8.136e-06
c71490_g8	retroelement pol poly	3	55	4.138	-0.251681	3.97e-07	8.311e-06
c82992_g2	PREDICTED: uncharacterized protein LOC104891943	309	48	-2.686	2.29136	4.03e-07	8.428e-06
c82676_g6	O-acyltransferase WSD1-like	14	120	3.086	0.902545	4.036e-07	8.433e-06
c92067_g1	scopoletin glucosyltransferase-like	102	604	2.562	3.26561	4.187e-07	8.739e-06
c77303_g3	amino acid permease 6-like///amino acid permease 3 isoform X1	61	4	-3.892	-0.09612	4.268e-07	8.883e-06
c86078_g2	antiviral alpha-like isoform X2	4	61	3.887	-0.097369	4.268e-07	8.883e-06
c90154_g5	PREDICTED: uncharacterized protein LOC104902921///PREDICTED: uncharacterized protein LOC104905864///PREDICTED: uncharacterized protein LOC104899017	61	4	-3.892	-0.09612	4.268e-07	8.883e-06
c80928_g4	disease resistance RGA1///disease resistance RGA3	41	1	-5.194	-0.681151	4.337e-07	9.008e-06
c81846_g6	kDa ribonuclease H	1	41	5.19	-0.682262	4.337e-07	9.008e-06
c65154_g1	ribonuclease H At1g65750	0	33	8.049	-0.996327	4.417e-07	9.067e-06
c74109_g1	heat shock cognate 70 kDa 2	33	0	-8.051	-0.995304	4.417e-07	9.067e-06
c76267_g3	PREDICTED: uncharacterized protein LOC104883482	0	33	8.049	-0.996327	4.417e-07	9.067e-06
c79828_g8	---NA---	0	33	8.049	-0.996327	4.417e-07	9.067e-06
c81079_g5	PREDICTED: uncharacterized protein LOC104899180	33	0	-8.051	-0.995304	4.417e-07	9.067e-06
c81476_g6	AC079604_5 copia-type	33	0	-8.051	-0.995304	4.417e-07	9.067e-06
c82763_g8	FAR1-RELATED SEQUENCE 5-like	0	33	8.049	-0.996327	4.417e-07	9.067e-06
c84091_g1	F-box kelch-repeat At1g23390	449	74	-2.601	2.83718	4.417e-07	9.067e-06
c85441_g1	1,8-cineole chloroplastic	33	0	-8.051	-0.995304	4.417e-07	9.067e-06
c86608_g4	copia isoform X1	0	33	8.049	-0.996327	4.417e-07	9.067e-06
c90226_g2	PREDICTED: uncharacterized protein LOC104896745	0	33	8.049	-0.996327	4.417e-07	9.067e-06
c95432_g1	predicted protein	0	33	8.049	-0.996327	4.417e-07	9.067e-06
c78895_g4	expansin-like B1	119	14	-3.079	0.893472	4.503e-07	9.234e-06
c93112_g1	PREDICTED: uncharacterized protein LOC104906595 isoform X2///TPX2-like isoform X2///PREDICTED: uncharacterized protein LOC104906595 isoform X1///TPX2-like isoform X1///---NA---	1521	273	-2.48	4.60772	4.875e-07	9.987e-06
c82811_g2	IAA-amino acid hydrolase ILR1-like 4	21	157	2.893	1.3018	4.951e-07	1.013e-05
c80240_g7	ribonuclease H At1g65750-like///ribonuclease H At1g65750	84	8	-3.374	0.380361	4.99e-07	1.019e-05
c80771_g4	FAR1-RELATED SEQUENCE 5-like	8	84	3.37	0.379027	4.99e-07	1.019e-05
c73654_g1	F-box At3g08750-like	60	4	-3.868	-0.117187	5.212e-07	1.064e-05
c76952_g3	SAFB-like transcription modulator	5	66	3.687	0.022917	5.288e-07	1.077e-05
c82612_g1	phospholipase A1-IIgamma-like	66	5	-3.692	0.024183	5.288e-07	1.077e-05
c77352_g8	cytosolic sulfotransferase 5-like	106	12	-3.132	0.726162	5.516e-07	1.122e-05
c72494_g1	FKBP-type peptidyl-prolyl cis-trans isomerase	47	2	-4.473	-0.476771	5.552e-07	1.129e-05
c85265_g3	two-component response regulator-like APRR7///Zinc finger CONSTANS-LIKE 4	20	150	2.897	1.23695	5.638e-07	1.145e-05
c77804_g1	serum response factor homolog B	40	1	-5.159	-0.712868	5.719e-07	1.159e-05
c78911_g1	omega-hydroxypalmitate O-feruloyl transferase-like///omega-hydroxypalmitate O-feruloyl transferase	1	40	5.154	-0.713964	5.719e-07	1.159e-05
c89107_g2	chalcone synthase	28	193	2.777	1.60777	5.861e-07	1.187e-05
c86194_g5	(3S,6E)-nerolidol synthase 1-like	111	13	-3.084	0.795428	5.907e-07	1.195e-05
c91255_g9	GPI mannosyltransferase 2	182	26	-2.804	1.52339	5.936e-07	1.2e-05
c59802_g2	polypeptide with a gag-like domain	32	0	-8.007	-1.03484	6.116e-07	1.22e-05
c70891_g1	hypothetical protein BVRB_5g118720	32	0	-8.007	-1.03484	6.116e-07	1.22e-05
c72074_g5	superoxide-generating NADPH oxidase heavy chain subunit C-like	32	0	-8.007	-1.03484	6.116e-07	1.22e-05
c72340_g6	heat shock cognate 70 kDa 2///probable mediator of RNA polymerase II transcription subunit 37e	32	0	-8.007	-1.03484	6.116e-07	1.22e-05
c72768_g2	amino acid permease 6-like	32	0	-8.007	-1.03484	6.116e-07	1.22e-05
c73854_g2	phytase (plasmid)	32	0	-8.007	-1.03484	6.116e-07	1.22e-05
c76698_g5	probable leucine-rich repeat receptor kinase At1g35710	0	32	8.004	-1.03585	6.116e-07	1.22e-05
c76759_g3	hypothetical protein VITISV_031216	0	32	8.004	-1.03585	6.116e-07	1.22e-05
c81476_g4	AC037197_10 copia-type poly	32	0	-8.007	-1.03484	6.116e-07	1.22e-05
c81476_g8	retrotransposon unclassified	32	0	-8.007	-1.03484	6.116e-07	1.22e-05
c84625_g1	FAR-RED IMPAIRED RESPONSE 1-like///FAR1-RELATED SEQUENCE 6-like isoform X1	32	0	-8.007	-1.03484	6.116e-07	1.22e-05
c87909_g2	PIF-like transposase	0	32	8.004	-1.03585	6.116e-07	1.22e-05
c89708_g1	RING U-box and TRAF-like domains///hypothetical protein SOVF_096970	32	0	-8.007	-1.03484	6.116e-07	1.22e-05
c90522_g5	ribonuclease H At1g65750	0	32	8.004	-1.03585	6.116e-07	1.22e-05
c86326_g7	F-box kelch-repeat At3g23880-like///F-box CPR30-like	82	480	2.545	2.9386	6.323e-07	1.26e-05
c82239_g9	receptor kinase At4g00960	5	65	3.665	0.003556	6.368e-07	1.266e-05
c86739_g1	wall-associated receptor kinase-like 16///wall-associated receptor kinase-like 22 isoform X1	65	5	-3.67	0.004813	6.368e-07	1.266e-05
c72644_g1	hypothetical protein BVRB_8g187680///---NA---	4	59	3.839	-0.139793	6.377e-07	1.267e-05
c76653_g3	poly [ADP-ribose] polymerase 3	143	19	-2.906	1.17049	6.479e-07	1.286e-05
c86621_g1	PREDICTED: uncharacterized protein LOC104906299///PREDICTED: uncharacterized protein LOC104898733	27	186	2.776	1.55554	6.565e-07	1.302e-05
c3760_g1	calcium-binding CML42	114	649	2.505	3.37702	6.604e-07	1.308e-05
c73231_g2	GDSL esterase lipase At4g16230-like	50	308	2.618	2.29381	6.797e-07	1.345e-05
c77241_g2	probable leucine-rich repeat receptor kinase At5g49770	212	32	-2.726	1.74967	6.904e-07	1.365e-05
c92822_g4	SYS1 homolog	1651	305	-2.438	4.73217	6.976e-07	1.378e-05
c77666_g3	PREDICTED: uncharacterized protein LOC104902849///rRNA biogenesis RRP36-like isoform X2	2	46	4.438	-0.5054	7.107e-07	1.402e-05
c89500_g1	pentatricopeptide repeat-containing At4g38150-like	54	328	2.597	2.38642	7.148e-07	1.409e-05
c81338_g1	bifunctional epoxide hydrolase 2-like	1214	223	-2.446	4.28838	7.381e-07	1.454e-05
c87779_g1	RING-H2 finger ATL3-like///RING-H2 finger ATL60-like	98	11	-3.143	0.615589	7.493e-07	1.475e-05
c89287_g1	F-box kelch-repeat At3g06240-like isoform X2///F-box CPR30-like	55	332	2.589	2.40499	7.532e-07	1.481e-05
c78294_g4	---NA---	39	1	-5.122	-0.745297	7.569e-07	1.485e-05
c82580_g4	---NA---	1	39	5.118	-0.746377	7.569e-07	1.485e-05
c69620_g1	ethylene-responsive transcription factor 1B	64	5	-3.648	-0.014821	7.681e-07	1.506e-05
c84554_g2	cytochrome P450 71A22-like	125	16	-2.958	0.975344	7.693e-07	1.507e-05
c85488_g2	B3 domain-containing Os01g0723500-like	92	10	-3.188	0.523322	7.996e-07	1.565e-05
c87621_g1	myosin-2-like isoform X1///myosin-2 isoform X1///myosin-2 isoform X2///myosin-1 isoform X1	32	209	2.7	1.73063	8.349e-07	1.632e-05
c92353_g2	probable serine threonine- kinase WNK10	490	2594	2.402	5.38638	8.386e-07	1.638e-05
c52330_g1	early nodulin 1	31	0	-7.961	-1.07549	8.515e-07	1.646e-05
c65289_g1	---NA---	31	0	-7.961	-1.07549	8.515e-07	1.646e-05
c67051_g2	PREDICTED: uncharacterized protein LOC104903461	0	31	7.959	-1.07648	8.515e-07	1.646e-05
c70746_g7	probable LRR receptor-like serine threonine- kinase At3g47570///LRR receptor-like serine threonine-	0	31	7.959	-1.07648	8.515e-07	1.646e-05
c72977_g8	copia isoform X1	0	31	7.959	-1.07648	8.515e-07	1.646e-05
c74311_g13	receptor 12	31	0	-7.961	-1.07549	8.515e-07	1.646e-05
c75272_g6	UPF0586 C9orf41	0	31	7.959	-1.07648	8.515e-07	1.646e-05
c75672_g2	probable LRR receptor-like serine threonine- kinase At3g47570	31	0	-7.961	-1.07549	8.515e-07	1.646e-05
c76910_g1	ribonuclease H At1g65750-like///non-ltr retroelement reverse transcriptase	0	31	7.959	-1.07648	8.515e-07	1.646e-05
c78924_g6	gag-pol poly	31	0	-7.961	-1.07549	8.515e-07	1.646e-05
c80740_g1	hyoscyamine 6-dioxygenase-like	0	31	7.959	-1.07648	8.515e-07	1.646e-05
c78548_g3	disease resistance RGA1	69	6	-3.499	0.099144	8.834e-07	1.706e-05
c72036_g2	serine threonine- phosphatase 7 long form homolog///PREDICTED: uncharacterized protein LOC104908122	45	2	-4.411	-0.532279	9.123e-07	1.759e-05
c78258_g10	disease resistance RGA2-like	45	2	-4.411	-0.532279	9.123e-07	1.759e-05
c70823_g1	AF525305_2 AP endonuclease reverse transcriptase///PREDICTED: uncharacterized protein LOC104896745	8	80	3.299	0.317642	9.171e-07	1.767e-05
c90239_g1	UDP-glycosyltransferase 74E1-like	233	37	-2.653	1.89351	9.5e-07	1.828e-05
c70774_g1	vinorine synthase-like	51	3	-4.034	-0.346703	9.646e-07	1.855e-05
c88109_g1	Ankyrin repeat family	21	149	2.817	1.23696	9.843e-07	1.891e-05
c80433_g6	mariner transposase	38	1	-5.085	-0.778472	1.006e-06	1.93e-05
c77294_g1	PREDICTED: uncharacterized protein LOC100779572 isoform X1///hypothetical protein PHAVU_005G104500g///PREDICTED: uncharacterized protein LOC104440633	290	1531	2.397	4.62762	1.023e-06	1.962e-05
c77517_g7	PREDICTED: uncharacterized protein LOC104901041///PREDICTED: uncharacterized protein LOC104893292	138	19	-2.855	1.12635	1.03e-06	1.973e-05
c92875_g1	serine threonine- phosphatase 7 long form homolog	164	24	-2.769	1.38041	1.042e-06	1.995e-05
c54448_g1	kunitz-type trypsin inhibitor alpha chain-like	13	106	3.013	0.736565	1.064e-06	2.035e-05
c88126_g4	Retrotransposon gag	8	79	3.281	0.301879	1.071e-06	2.046e-05
c77462_g1	mitogen-activated kinase kinase kinase NPK1-like///Mitogen-activated kinase kinase kinase	354	61	-2.537	2.5063	1.08e-06	2.062e-05
c90722_g6	---NA---	23052	4522	-2.352	8.54676	1.096e-06	2.09e-05
c74502_g1	transcription factor GTE10-like	74	419	2.497	2.75107	1.136e-06	2.165e-05
c92567_g3	DUF506 family	647	119	-2.444	3.38422	1.143e-06	2.176e-05
c75426_g3	ethylene-responsive transcription factor ABR1	73	7	-3.362	0.187684	1.161e-06	2.209e-05
c107430_g1	---NA---	30	0	-7.914	-1.11732	1.192e-06	2.245e-05
c64864_g1	cathepsin partial	0	30	7.912	-1.11829	1.192e-06	2.245e-05
c71416_g2	basic 7S globulin-like	0	30	7.912	-1.11829	1.192e-06	2.245e-05
c78816_g4	hypothetical protein	30	0	-7.914	-1.11732	1.192e-06	2.245e-05
c80750_g2	ribonuclease H At1g65750	0	30	7.912	-1.11829	1.192e-06	2.245e-05
c80964_g5	PREDICTED: uncharacterized protein LOC104887355///PREDICTED: uncharacterized protein LOC104905474///PREDICTED: uncharacterized protein LOC104895918	30	0	-7.914	-1.11732	1.192e-06	2.245e-05
c82461_g7	retroelement pol poly -like	30	0	-7.914	-1.11732	1.192e-06	2.245e-05
c83331_g6	uncharacterized mitochondrial g00810-like	0	30	7.912	-1.11829	1.192e-06	2.245e-05
c87991_g8	retroelement pol poly	0	30	7.912	-1.11829	1.192e-06	2.245e-05
c88368_g4	probable disease resistance RF45	0	30	7.912	-1.11829	1.192e-06	2.245e-05
c94948_g4	disease resistance RGA1	30	0	-7.914	-1.11732	1.192e-06	2.245e-05
c73465_g1	receptor-like cytosolic serine threonine- kinase RBK2 isoform X2///receptor-like cytosolic serine threonine- kinase RBK2	49	290	2.56	2.21604	1.209e-06	2.275e-05
c88618_g2	caffeate O- partial	3	50	4.001	-0.372957	1.212e-06	2.275e-05
c92653_g2	calcium-dependent kinase 24	50	3	-4.006	-0.3718	1.212e-06	2.275e-05
c90587_g3	UPF0496 At4g34320-like	669	3431	2.356	5.79675	1.246e-06	2.337e-05
c80737_g2	cysteine-rich receptor kinase 10	749	140	-2.421	3.59803	1.248e-06	2.339e-05
c89258_g12	zinc finger BED domain-containing RICESLEEPER 2-like///zinc finger BED domain-containing RICESLEEPER 1-like	1751	339	-2.371	4.82757	1.283e-06	2.403e-05
c88150_g2	AC069473_8 gypsy Ty-3 retroelement poly 69905-74404///transposon Tf2-1 poly isoform X1	258	43	-2.584	2.04814	1.301e-06	2.434e-05
c74721_g2	dirigent 8	37	1	-5.047	-0.812427	1.342e-06	2.509e-05
c87660_g6	disease resistance At4g27190-like isoform X1///disease resistance At4g27190-like	242	40	-2.596	1.95534	1.357e-06	2.535e-05
c50785_g1	probable glutathione S-transferase///Glutathione S-transferase tau	61	5	-3.578	-0.075378	1.362e-06	2.542e-05
c72246_g1	PREDICTED: uncharacterized protein LOC104901296	7	72	3.337	0.16914	1.372e-06	2.557e-05
c75493_g3	---NA---	72	7	-3.342	0.170402	1.372e-06	2.557e-05
c90491_g2	AC069473_8 gypsy Ty-3 retroelement poly 69905-74404	276	47	-2.553	2.14862	1.451e-06	2.7e-05
c91086_g2	PREDICTED: uncharacterized protein LOC104896523 isoform X3	55	4	-3.743	-0.227398	1.458e-06	2.712e-05
c74436_g3	cytochrome P450 71A22-like	139	736	2.401	3.57368	1.497e-06	2.781e-05
c93764_g1	---NA---///cysteine--tRNA cytoplasmic isoform X1	1467	286	-2.361	4.57442	1.498e-06	2.781e-05
c76834_g3	70 kDa peptidyl-prolyl isomerase-like	90	490	2.441	2.98379	1.515e-06	2.81e-05
c81314_g2	probable carboxylesterase 5///hypothetical protein, partial	73	405	2.468	2.70686	1.522e-06	2.82e-05
c78271_g4	Os03g0733400	49	3	-3.977	-0.397342	1.526e-06	2.825e-05
c78541_g3	bark storage A-like	3826	764	-2.326	5.96106	1.59e-06	2.941e-05
c82590_g2	MLP 34///MATH and LRR domain-containing isoform 2	858	165	-2.38	3.79973	1.637e-06	3.026e-05
c75470_g4	PREDICTED: uncharacterized protein LOC104891244///MATE efflux family 5-like	60	5	-3.555	-0.096142	1.654e-06	3.052e-05
c82811_g4	IAA-amino acid hydrolase ILR1-like 4	5	60	3.55	-0.097347	1.654e-06	3.052e-05
c42154_g1	PHLOEM PROTEIN 2-LIKE A1-like	29	0	-7.865	-1.1604	1.679e-06	3.073e-05
c71780_g2	disease resistance RGA1	0	29	7.863	-1.16135	1.679e-06	3.073e-05
c72789_g3	ROOT HAIR DEFECTIVE 3-like	29	0	-7.865	-1.1604	1.679e-06	3.073e-05
c74826_g7	PREDICTED: uncharacterized protein LOC104904026 isoform X1///hypothetical protein MTR_8g045000	29	0	-7.865	-1.1604	1.679e-06	3.073e-05
c78868_g4	hypothetical protein VITISV_041217	0	29	7.863	-1.16135	1.679e-06	3.073e-05
c79040_g6	ribonuclease H At1g65750-like	0	29	7.863	-1.16135	1.679e-06	3.073e-05
c82893_g8	PREDICTED: uncharacterized protein LOC104906554	0	29	7.863	-1.16135	1.679e-06	3.073e-05
c90296_g1	hypothetical protein	29	0	-7.865	-1.1604	1.679e-06	3.073e-05
c90753_g3	Ribonuclease H	29	0	-7.865	-1.1604	1.679e-06	3.073e-05
c92356_g2	rotamase FKBP 1	337	60	-2.49	2.44294	1.716e-06	3.138e-05
c64189_g1	cysteine ase inhibitor B-like	117	16	-2.863	0.893445	1.789e-06	3.266e-05
c81592_g2	zinc finger ZAT12///zinc finger ZAT8-like	16	117	2.858	0.892082	1.789e-06	3.266e-05
c88452_g5	gag-pol poly	36	1	-5.007	-0.847201	1.798e-06	3.279e-05
c85279_g1	Retrovirus-related Pol poly from transposon TNT 1-94///poly///retrotransposon like	17	122	2.832	0.953918	1.802e-06	3.284e-05
c72944_g6	PREDICTED: uncharacterized protein LOC104905670	65	6	-3.413	0.024163	1.807e-06	3.29e-05
c81701_g1	RING U-box superfamily	385	70	-2.46	2.63784	1.808e-06	3.29e-05
c95014_g1	Gag-protease-integrase-RT-R poly///kinase chloroplastic-like///PREDICTED: uncharacterized protein LOC106427720	53	301	2.501	2.2778	1.816e-06	3.301e-05
c88730_g3	A Chain Crystal Structure Of A Family Gh-19 Chitinase From Rye Seeds	206	34	-2.597	1.72619	1.926e-06	3.499e-05
c75672_g3	probable LRR receptor-like serine threonine- kinase At3g47570	42	2	-4.311	-0.619764	1.966e-06	3.562e-05
c80248_g5	germin 2-1	2	42	4.307	-0.620849	1.966e-06	3.562e-05
c81875_g8	hypothetical protein SOVF_064810///PREDICTED: uncharacterized protein LOC104908246 isoform X1	412	76	-2.439	2.738	1.965e-06	3.562e-05
c89543_g2	retrotransposon gag	14	106	2.907	0.748258	1.969e-06	3.563e-05
c88193_g2	---NA---///hypothetical protein SORBIDRAFT_01g006510///PREDICTED: uncharacterized protein LOC104894426 isoform X2	161	25	-2.683	1.36529	1.984e-06	3.589e-05
c79675_g2	cysteine ase inhibitor 1-like	244	1233	2.334	4.32631	2e-06	3.614e-05
c113318_g1	basic 7S globulin-like	92	488	2.403	2.9838	2.095e-06	3.783e-05
c73736_g6	NAC domain-containing 29///NAC transcription factor 29///NAC domain NAC1	85	10	-3.074	0.424732	2.128e-06	3.839e-05
c74963_g5	retroelement pol poly -like	6	64	3.386	0.003577	2.169e-06	3.909e-05
c82992_g1	conserved hypothetical protein	462	87	-2.41	2.90662	2.196e-06	3.954e-05
c76797_g1	heat shock cognate 70 kDa	350	64	-2.451	2.50284	2.214e-06	3.984e-05
c88655_g4	Hydroxyproline-rich glyco family	54	300	2.469	2.27781	2.35e-06	4.224e-05
c27737_g1	mitochondrial outer membrane porin of 36 kDa	28	0	-7.815	-1.2048	2.378e-06	4.239e-05
c62661_g2	MLO 1	0	28	7.813	-1.20573	2.378e-06	4.239e-05
c63722_g3	AF277260_1 disrupted meiotic cDNA 1 partial///meiotic recombination DMC1 homolog	0	28	7.813	-1.20573	2.378e-06	4.239e-05
c64671_g1	F-box At5g50220	28	0	-7.815	-1.2048	2.378e-06	4.239e-05
c67492_g1	splicing factor 3A subunit 3	0	28	7.813	-1.20573	2.378e-06	4.239e-05
c75835_g6	retroelement pol poly///retroelement pol poly -like	0	28	7.813	-1.20573	2.378e-06	4.239e-05
c78466_g4	F-box SKIP23-like	28	0	-7.815	-1.2048	2.378e-06	4.239e-05
c78582_g3	hypothetical protein glysoja_024183///---NA---	28	0	-7.815	-1.2048	2.378e-06	4.239e-05
c79147_g3	plant intracellular Ras-group-related LRR 6	28	0	-7.815	-1.2048	2.378e-06	4.239e-05
c85611_g1	nuclear transport factor 2 (NTF2) family	193	32	-2.59	1.63465	2.368e-06	4.239e-05
c77334_g1	glycine-rich domain-containing 1	35	1	-4.967	-0.882833	2.418e-06	4.299e-05
c84746_g5	organic cation carnitine transporter 3-like///organic cation carnitine transporter 2-like	35	1	-4.967	-0.882833	2.418e-06	4.299e-05
c89224_g1	Zinc finger family	1	35	4.962	-0.883848	2.418e-06	4.299e-05
c81689_g4	WAT1-related At5g64700	177	893	2.332	3.86274	2.425e-06	4.308e-05
c87053_g4	transposon En Spm sub-class	58.24	5	-3.512	-0.133428	2.453e-06	4.354e-05
c72213_g2	sieve element occlusion a	11	89	3	0.494524	2.48e-06	4.394e-05
c90416_g2	cytochrome P450 83B1-like	89	11	-3.004	0.495818	2.48e-06	4.394e-05
c89713_g1	serine threonine- kinase WNK8-like///probable serine threonine- kinase WNK4	197	33	-2.576	1.66581	2.507e-06	4.437e-05
c75626_g1	zinc transporter chloroplastic-like	623	3038	2.283	5.63355	2.51e-06	4.44e-05
c80368_g1	7-deoxyloganetin glucosyltransferase	41	2	-4.277	-0.650145	2.557e-06	4.511e-05
c83115_g1	Rossmann-fold NAD(P)-binding domain-containing	41	2	-4.277	-0.650145	2.557e-06	4.511e-05
c86652_g1	probable nucleoredoxin 1	41	2	-4.277	-0.650145	2.557e-06	4.511e-05
c87348_g1	hypothetical protein SOVF_207160	306	56	-2.45	2.31117	2.749e-06	4.846e-05
c93946_g1	low-temperature-induced 65 kDa -like	258	46	-2.487	2.06224	2.759e-06	4.86e-05
c85332_g3	calcium-dependent lipid-binding ( domain) family	52	4	-3.662	-0.297805	2.771e-06	4.877e-05
c81061_g4	UDP-glycosyltransferase 76C2-like	108	15	-2.84	0.784081	2.786e-06	4.899e-05
c92656_g2	UDP-glycosyltransferase 74F2-like	253	45	-2.49	2.03386	2.788e-06	4.899e-05
c79547_g1	dynamin-related 5A	1305	266	-2.296	4.41664	2.807e-06	4.923e-05
c94762_g1	ty1-copia retrotransposon	147	23	-2.672	1.23837	2.804e-06	4.923e-05
c88286_g1	serine threonine- kinase CDL1///serine threonine- kinase PBS1///serine threonine- kinase PBS1-like	224	39	-2.521	1.85615	2.823e-06	4.948e-05
c80400_g2	FAR1-RELATED SEQUENCE 6-like///FAR-RED IMPAIRED RESPONSE 1-like///FAR1-RELATED SEQUENCE 5-like	10	83	3.035	0.394008	2.839e-06	4.971e-05
c65253_g1	---NA---	19	127	2.73	1.02287	2.958e-06	5.176e-05
c75075_g3	PREDICTED: uncharacterized protein LOC104889873 isoform X3	261	47	-2.473	2.08086	3.016e-06	5.272e-05
c83992_g2	salicylate carboxymethyltransferase-like	62	6	-3.345	-0.034747	3.14e-06	5.481e-05
c85398_g1	uncharacterized transporter YBR287W isoform X1///uncharacterized transporter	1464	302	-2.279	4.58503	3.139e-06	5.481e-05
c83808_g3	PREDICTED: uncharacterized protein LOC104908184///PREDICTED: uncharacterized protein LOC104892995///PREDICTED: uncharacterized protein LOC104889325	274	50	-2.454	2.15301	3.204e-06	5.588e-05
c73891_g1	disease resistance RGA1 isoform X1	7	67	3.234	0.079526	3.227e-06	5.613e-05
c74087_g1	naringenin,2-oxoglutarate 3-dioxygenase	7	67	3.234	0.079526	3.227e-06	5.613e-05
c87838_g1	ABC transporter F family member 4-like isoform X1///ABC transporter F family member 4-like isoform X3	67	7	-3.238	0.080741	3.227e-06	5.613e-05
c76878_g6	uncharacterized mitochondrial g00810-like	34	1	-4.925	-0.919368	3.268e-06	5.67e-05
c81401_g2	FAR1-RELATED SEQUENCE 5-like	1	34	4.921	-0.920365	3.268e-06	5.67e-05
c91382_g1	hypothetical protein SOVF_197280	1	34	4.921	-0.920365	3.268e-06	5.67e-05
c81953_g6	Cytidine deoxycytidylate deaminase family	720	3431	2.25	5.81459	3.323e-06	5.761e-05
c89923_g2	flocculation FLO11-like///---NA---	40	2	-4.241	-0.681179	3.335e-06	5.777e-05
c73102_g6	PREDICTED: uncharacterized protein LOC101254987	0	27	7.76	-1.25153	3.39e-06	5.815e-05
c74749_g18	uncharacterized mitochondrial g00810-like	27	0	-7.763	-1.25062	3.39e-06	5.815e-05
c77706_g10	PREDICTED: uncharacterized protein LOC104899180	0	27	7.76	-1.25153	3.39e-06	5.815e-05
c79487_g4	acetylajmalan esterase-like	0	27	7.76	-1.25153	3.39e-06	5.815e-05
c80354_g1	spermidine hydroxycinnamoyl transferase-like	27	0	-7.763	-1.25062	3.39e-06	5.815e-05
c82730_g8	retroelement pol poly	27	0	-7.763	-1.25062	3.39e-06	5.815e-05
c82730_g9	retroelement pol poly	27	0	-7.763	-1.25062	3.39e-06	5.815e-05
c83617_g3	wall-associated receptor kinase-like 1///wall-associated receptor kinase-like 1 isoform X1	0	27	7.76	-1.25153	3.39e-06	5.815e-05
c86516_g1	---NA---///Werner syndrome-like	0	27	7.76	-1.25153	3.39e-06	5.815e-05
c88723_g13	retrovirus-related poly s	27	0	-7.763	-1.25062	3.39e-06	5.815e-05
c89895_g1	methyltransferase DDB_G0268948	433	84	-2.367	2.82061	3.382e-06	5.815e-05
c9576_g1	retroelement pol poly -like	27	0	-7.763	-1.25062	3.39e-06	5.815e-05
c83408_g1	probable pectinesterase pectinesterase inhibitor	51	4	-3.634	-0.322059	3.448e-06	5.909e-05
c86905_g1	probable metal-nicotianamine transporter YSL7	37	211	2.505	1.7713	3.467e-06	5.936e-05
c74741_g2	ethylene-responsive transcription factor WIN1-like	40	225	2.486	1.86548	3.501e-06	5.991e-05
c88327_g1	thylakoid lumenal chloroplastic	1594	333	-2.261	4.71063	3.595e-06	6.146e-05
c77196_g1	gibberellin 2-beta-dioxygenase 1-like///CEN 2///gibberellin 2-oxidase 2	1919	403	-2.254	4.97913	3.622e-06	6.187e-05
c79081_g4	Retrovirus-related Pol poly from transposon TNT 1-94	5	56	3.451	-0.183481	3.666e-06	6.252e-05
c93857_g1	hypothetical protein VITISV_018870	56	5	-3.455	-0.182321	3.666e-06	6.252e-05
c87991_g5	polypeptide with an integrase domain///polypeptide with a gag-like domain///Retrovirus-related Pol poly from transposon TNT 1-94	360	69	-2.384	2.55369	3.689e-06	6.287e-05
c95284_g1	late blight resistance homolog R1B-16///late blight resistance homolog R1A-3	219	39	-2.488	1.82887	3.772e-06	6.423e-05
c90710_g1	sodium-coupled neutral amino acid transporter 1-like isoform X1///sodium-coupled neutral amino acid transporter 2-like///Transmembrane amino acid transporter family///probable sodium-coupled neutral amino acid transporter 6///sodium-coupled neutral amino acid transporter 4-like	503	100	-2.332	3.04103	3.874e-06	6.591e-05
c65350_g1	F-box CPR30-like isoform X1///F-box CPR30-like	3	45	3.85	-0.505374	3.937e-06	6.693e-05
c89684_g1	hypothetical protein SOVF_057750	2007	9338	2.216	7.26424	4.055e-06	6.888e-05
c90847_g1	deoxynucleoside triphosphate triphosphohydrolase SAMHD1 homolog isoform X1///deoxynucleoside triphosphate triphosphohydrolase SAMHD1 homolog isoform X2	271	1293	2.251	4.40868	4.116e-06	6.98e-05
c94632_g2	serine threonine- kinase HT1	80	408	2.346	2.73651	4.115e-06	6.98e-05
c79492_g1	GAMETE EXPRESSED 2	126	622	2.3	3.34857	4.122e-06	6.985e-05
c86614_g3	mediator of RNA polymerase II transcription subunit 25 isoform X1///mediator of RNA polymerase II transcription subunit 25 isoform X2///mediator of RNA polymerase II transcription subunit 25-like isoform X1///mediator of RNA polymerase II transcription subunit 25	24	147	2.606	1.24526	4.215e-06	7.137e-05
c92364_g1	SAFB-like transcription modulator	175	847	2.272	3.79679	4.237e-06	7.167e-05
c76550_g2	disease resistance RGA2-like isoform X1	39	2	-4.205	-0.712896	4.365e-06	7.379e-05
c32704_g1	shikimate O-hydroxycinnamoyltransferase-like	1	33	4.878	-0.957831	4.436e-06	7.462e-05
c74749_g14	retroelement pol poly	32.67	1	-4.868	-0.969438	4.436e-06	7.462e-05
c75199_g2	hypothetical protein SOVF_065740 isoform B	33	1	-4.882	-0.956851	4.436e-06	7.462e-05
c75930_g1	serpin-ZX-like///serpin-ZX	33	1	-4.882	-0.956851	4.436e-06	7.462e-05
c78079_g3	RING U-box and TRAF-like domains	33	1	-4.882	-0.956851	4.436e-06	7.462e-05
c91480_g1	trichome birefringence-like 25	1	33	4.878	-0.957831	4.436e-06	7.462e-05
c81850_g1	beta-glucosidase 12-like	53	281	2.401	2.19489	4.443e-06	7.469e-05
c77101_g3	UBIQ_AVESA ame: Full=Ubiquitin///polyubiquitin isoform X1///ubiquitin	50	267	2.412	2.12044	4.472e-06	7.51e-05
c79199_g10	elongation factor 1-alpha	65	7	-3.195	0.043256	4.587e-06	7.697e-05
c88273_g1	thiosulfate sulfurtransferase chloroplastic-like	1542	329	-2.231	4.66816	4.767e-06	7.994e-05
c67166_g1	disease resistance RPP13 1	26	0	-7.709	-1.29794	4.864e-06	8.066e-05
c68346_g1	---NA---	26	0	-7.709	-1.29794	4.864e-06	8.066e-05
c68825_g7	transmembrane 9 superfamily member 2///phagocytic receptor 1b	0	26	7.706	-1.29882	4.864e-06	8.066e-05
c70487_g2	PREDICTED: uncharacterized protein LOC102661920	0	26	7.706	-1.29882	4.864e-06	8.066e-05
c72768_g1	amino acid permease 6-like	26	0	-7.709	-1.29794	4.864e-06	8.066e-05
c73411_g3	Disease resistance family LRR family	26	0	-7.709	-1.29794	4.864e-06	8.066e-05
c74549_g2	Cysteine-rich RLK (RECEPTOR kinase) 8///retrovirus-related like poly///retroelement pol poly	26	0	-7.709	-1.29794	4.864e-06	8.066e-05
c76749_g6	testis-expressed sequence 10 isoform X2///Myb SANT-like DNA-binding domain	26	0	-7.709	-1.29794	4.864e-06	8.066e-05
c77979_g9	disease resistance RPP13 1	0	26	7.706	-1.29882	4.864e-06	8.066e-05
c78511_g3	gag-pol poly	26	0	-7.709	-1.29794	4.864e-06	8.066e-05
c82179_g6	retrotransposon Ty3-gypsy subclass	26	0	-7.709	-1.29794	4.864e-06	8.066e-05
c82499_g5	cysteine--tRNA cytoplasmic isoform X1	26	0	-7.709	-1.29794	4.864e-06	8.066e-05
c86552_g1	---NA---	26	0	-7.709	-1.29794	4.864e-06	8.066e-05
c89368_g1	PREDICTED: uncharacterized protein LOC104894426 isoform X2///PREDICTED: uncharacterized protein LOC104894427	0	26	7.706	-1.29882	4.864e-06	8.066e-05
c73293_g2	Tam3-transposase	84	11	-2.921	0.424715	4.966e-06	8.228e-05
c91904_g2	S28541 rRNA N-glycosidase (EC ) (clone G-4) - common soapwort (fragment)	44	3	-3.822	-0.532305	5.024e-06	8.319e-05
c75196_g1	uncharacterized acetyltransferase At3g50280-like	79	10	-2.969	0.33451	5.11e-06	8.453e-05
c69935_g1	pre-mRNA-splicing factor CWC22 homolog	28	163	2.534	1.40138	5.201e-06	8.598e-05
c84266_g3	PREDICTED: uncharacterized protein LOC104883482///PREDICTED: uncharacterized protein LOC104907437///pollen-specific leucine-rich repeat extensin 1	35	195	2.471	1.6644	5.265e-06	8.697e-05
c85620_g1	L-type lectin-domain containing receptor kinase -like	703	147	-2.259	3.53357	5.351e-06	8.832e-05
c81868_g1	PREDICTED: uncharacterized protein LOC104890454	144	691	2.259	3.50651	5.39e-06	8.89e-05
c81905_g2	ubiquitin-conjugating enzyme E2 38	331	65	-2.348	2.43931	5.474e-06	9.02e-05
c75120_g1	hypothetical protein glysoja_040812	7	64	3.168	0.022958	5.48e-06	9.024e-05
c76791_g1	kelch 8	2655	579	-2.199	5.45638	5.514e-06	9.072e-05
c89248_g2	cytochrome P450 94A1-like	6	59	3.269	-0.097325	5.538e-06	9.105e-05
c94806_g3	trichohyalin-like isoform X1	102	498	2.284	3.0324	5.598e-06	9.197e-05
c56847_g3	hypothetical protein BVRB_5g104790	38	2	-4.168	-0.745325	5.734e-06	9.39e-05
c74656_g1	cytochrome P450 CYP72A219-like	38	2	-4.168	-0.745325	5.734e-06	9.39e-05
c79878_g10	tropinone reductase-like 1	2	38	4.163	-0.746349	5.734e-06	9.39e-05
c89350_g2	PREDICTED: uncharacterized protein LOC104892119	38	2	-4.168	-0.745325	5.734e-06	9.39e-05
c71612_g1	---NA---	189	34	-2.473	1.62197	5.781e-06	9.459e-05
c95189_g2	probable inactive receptor kinase At1g65250 isoform X1	166	29	-2.514	1.43204	5.865e-06	9.589e-05
c74845_g2	transcription factor MYB86-like	1	32	4.833	-0.996296	6.049e-06	9.874e-05
c82773_g2	probable leucine-rich repeat receptor kinase At5g63930	32	1	-4.838	-0.995335	6.049e-06	9.874e-05
c79431_g3	AP2-like ethylene-responsive transcription factor At1g16060	15	101	2.739	0.70098	6.295e-06	0.0001026
c88704_g4	1-aminocyclopropane-1-carboxylate oxidase	101	15	-2.744	0.702264	6.295e-06	0.0001026
c93402_g2	hypothetical protein SOVF_075010///PREDICTED: uncharacterized protein LOC104903869///RNA polymerase II-associated 1	7709	1719	-2.167	6.99883	6.358e-06	0.0001036
c74416_g9	Os03g0608600	76	376	2.302	2.6269	6.471e-06	0.0001053
c94593_g3	hypothetical protein SOVF_173920	889	191	-2.22	3.87762	6.52e-06	0.000106
c94111_g1	kunitz-type trypsin inhibitor alpha chain-like	110117	24693	-2.159	10.8361	6.532e-06	0.0001061
c72867_g2	ABC transporter G family member 14	7	63	3.145	0.003598	6.557e-06	0.0001065
c70456_g1	exopolygalacturonase-like	11	82	2.882	0.394025	6.597e-06	0.000107
c72075_g1	isoflavone 2 -hydroxylase-like///cytochrome P450 family	48	4	-3.547	-0.397367	6.731e-06	0.0001091
c83614_g4	PREDICTED: uncharacterized protein LOC104891435	339	68	-2.318	2.47844	6.755e-06	0.0001094
c119342_g1	hypothetical protein glysoja_044118	25	0	-7.652	-1.34685	7.026e-06	0.0001126
c49403_g1	---NA---	0	25	7.65	-1.34772	7.026e-06	0.0001126
c63593_g4	uncharacterized mitochondrial g00810-like	0	25	7.65	-1.34772	7.026e-06	0.0001126
c70196_g1	tubulin beta-8 chain-like	170	793	2.219	3.71136	6.977e-06	0.0001126
c72809_g4	ribonuclease H At1g65750	25	0	-7.652	-1.34685	7.026e-06	0.0001126
c74142_g14	---NA---	0	25	7.65	-1.34772	7.026e-06	0.0001126
c74391_g2	PREDICTED: uncharacterized protein LOC104903753	0	25	7.65	-1.34772	7.026e-06	0.0001126
c75954_g3	hypothetical protein BVRB_5g110720	25	0	-7.652	-1.34685	7.026e-06	0.0001126
c84153_g2	retroelement pol poly	0	25	7.65	-1.34772	7.026e-06	0.0001126
c86865_g4	PREDICTED: uncharacterized protein LOC104890294	25	0	-7.652	-1.34685	7.026e-06	0.0001126
c88329_g6	hypothetical protein BVRB_8g200520	0	25	7.65	-1.34772	7.026e-06	0.0001126
c89875_g5	histone H2A-like	25	0	-7.652	-1.34685	7.026e-06	0.0001126
c90464_g3	Kunitz trypsin inhibitor	0	25	7.65	-1.34772	7.026e-06	0.0001126
c91126_g1	retroelement pol poly -like	25	0	-7.652	-1.34685	7.026e-06	0.0001126
c80244_g3	dCTP pyrophosphatase 1-like	15	100	2.724	0.688911	7.09e-06	0.0001135
c93539_g1	hypothetical protein BVRB_1g012810	106	506	2.251	3.06079	7.221e-06	0.0001155
c75482_g1	CASP 1D1	12	86	2.826	0.466534	7.238e-06	0.0001156
c79234_g2	disease resistance RPS2-like isoform X2	86	12	-2.831	0.467779	7.238e-06	0.0001156
c93589_g2	DNA ligase 1-like	700	150	-2.224	3.53356	7.248e-06	0.0001157
c86639_g2	GDSL esterase lipase At4g16230-like///poly	20.81	127.18	2.602	1.0419	7.34e-06	0.0001171
c86903_g1	nucleolar GTP-binding 2	14	95	2.749	0.614278	7.452e-06	0.0001188
c76781_g6	E3 ubiquitin- ligase SDIR1 isoform X2	67	8	-3.049	0.099104	7.536e-06	0.0001199
c93319_g1	F-box SKIP23-like///PREDICTED: uncharacterized protein LOC104891244	67	8	-3.049	0.099104	7.536e-06	0.0001199
c86505_g2	glutathione S-transferase THETA 1	189	35	-2.431	1.62831	7.779e-06	0.0001237
c77174_g1	transcription factor bHLH18-like	211	40	-2.398	1.78978	7.886e-06	0.0001253
c87787_g2	wall-associated receptor kinase-like 16	32	175	2.444	1.51515	8.136e-06	0.0001292
c88372_g3	F-box SKIP23-like	6	57	3.219	-0.139749	8.151e-06	0.0001293
c71194_g1	LURP-one-related 12	42	3	-3.755	-0.590036	8.252e-06	0.0001307
c81266_g1	scopoletin glucosyltransferase-like	3	42	3.75	-0.591082	8.252e-06	0.0001307
c72021_g1	---NA---	31	1	-4.792	-1.03487	8.287e-06	0.0001312
c81378_g3	galactinol synthase 1	4	47	3.512	-0.42445	8.452e-06	0.0001336
c91513_g2	2 -deoxymugineic-acid 2 -dioxygenase-like	38	201	2.397	1.71886	8.451e-06	0.0001336
c90086_g1	inositol oxygenase 1-like///myo-inositol oxygenase	713	155	-2.203	3.56365	8.539e-06	0.0001349
c92228_g2	F-box At3g25750	89	13	-2.766	0.523273	8.954e-06	0.0001413
c86270_g1	galactoside 2-alpha-L-fucosyltransferase///galactoside 2-alpha-L-fucosyltransferase-like	17	107	2.643	0.794092	9.003e-06	0.0001419
c94016_g3	PREDICTED: uncharacterized protein LOC104887039///PREDICTED: uncharacterized protein LOC104901479	107	17	-2.647	0.795371	9.003e-06	0.0001419
c67650_g1	---NA---	61	7	-3.103	-0.034768	9.43e-06	0.0001485
c58739_g1	endonuclease 2	18	111	2.614	0.849372	9.479e-06	0.0001492
c93547_g2	PREDICTED: uncharacterized protein LOC104887544 isoform X2///hypothetical protein BVRB_2g041740	832	184	-2.179	3.78981	9.645e-06	0.0001517
c89331_g2	Inter-alpha-trypsin inhibitor heavy chain H3	155	28	-2.466	1.34229	9.672e-06	0.000152
c83601_g1	4-hydroxy-4-methyl-2-oxoglutarate aldolase 3	21	124	2.552	1.01325	9.795e-06	0.0001538
c62931_g1	temperature-induced lipocalin	1764	400	-2.143	4.87762	9.957e-06	0.0001562
c66469_g2	kinase 4-like	2	36	4.085	-0.813447	1e-05	0.0001567
c84441_g1	ubiquitin-conjugating enzyme E2 34-like	36	2	-4.09	-0.812456	1e-05	0.0001567
c87343_g3	amino acid permease 4///Amino acid permease 3	762	3336	2.128	5.7961	1.001e-05	0.0001568
c76556_g3	probable alpha,alpha-trehalose-phosphate synthase [UDP-forming] 9	1179	265	-2.155	4.29531	1.009e-05	0.0001579
c67801_g1	bidirectional sugar transporter SWEET14-like	24	0	-7.594	-1.39749	1.022e-05	0.000158
c71254_g1	PREDICTED: uncharacterized protein LOC104825741///Fgenesh 35	24	0	-7.594	-1.39749	1.022e-05	0.000158
c76381_g7	LINE-1 reverse transcriptase homolog///Transposon TX1 149 kDa	24	0	-7.594	-1.39749	1.022e-05	0.000158
c76698_g1	receptor 12	0	24	7.591	-1.39834	1.022e-05	0.000158
c77047_g1	PREDICTED: uncharacterized protein LOC104891244	24	0	-7.594	-1.39749	1.022e-05	0.000158
c77093_g3	disease resistance RPP13 1-like isoform X1	24	0	-7.594	-1.39749	1.022e-05	0.000158
c77260_g6	PREDICTED: uncharacterized protein LOC104889304	24	0	-7.594	-1.39749	1.022e-05	0.000158
c78552_g1	rho GTPase-activating gacII-like	0	24	7.591	-1.39834	1.022e-05	0.000158
c83166_g2	PREDICTED: uncharacterized protein LOC104899180	0	24	7.591	-1.39834	1.022e-05	0.000158
c83459_g1	PREDICTED: uncharacterized protein LOC104898809	0	24	7.591	-1.39834	1.022e-05	0.000158
c83459_g3	orf120 gene product (mitochondrion)	0	24	7.591	-1.39834	1.022e-05	0.000158
c84049_g1	PREDICTED: uncharacterized protein LOC104908184	24	0	-7.594	-1.39749	1.022e-05	0.000158
c88792_g1	centromere V	24	0	-7.594	-1.39749	1.022e-05	0.000158
c91798_g1	probable leucine-rich repeat receptor kinase At1g35710	80	380	2.244	2.652	1.022e-05	0.000158
c93931_g4	F-box LRR-repeat At3g26922-like isoform X1	24	0	-7.594	-1.39749	1.022e-05	0.000158
c96942_g1	two-component response regulator ARR9-like	0	24	7.591	-1.39834	1.022e-05	0.000158
c95186_g1	gag-pol poly	51	5	-3.321	-0.297829	1.035e-05	0.0001599
c91725_g3	pentatricopeptide repeat-containing chloroplastic	306	63	-2.28	2.33847	1.04e-05	0.0001605
c85884_g1	heat shock 70	41	210	2.351	1.7884	1.083e-05	0.000167
c75325_g4	serine threonine- phosphatase 7 long form homolog	92	14	-2.708	0.576712	1.087e-05	0.0001675
c70324_g3	peptidyl-prolyl cis-trans isomerase FKBP62	74	352	2.246	2.54222	1.099e-05	0.0001693
c81675_g1	unnamed protein product///PREDICTED: uncharacterized protein LOC104883674	127	22	-2.525	1.05277	1.119e-05	0.0001723
c71473_g1	thioredoxin H2-like	166	31	-2.419	1.44645	1.133e-05	0.0001743
c66046_g1	glutathione S-transferase T2-like	30	1	-4.745	-1.07552	1.141e-05	0.0001751
c74039_g1	probable pectinesterase pectinesterase inhibitor 36	1	30	4.741	-1.07645	1.141e-05	0.0001751
c88861_g4	translocon at the outer membrane of chloroplasts 64	30	1	-4.745	-1.07552	1.141e-05	0.0001751
c95254_g2	serine threonine- phosphatase 6 regulatory ankyrin repeat subunit C-like	12204	2854	-2.099	7.6741	1.157e-05	0.0001774
c91432_g1	PREDICTED: uncharacterized protein LOC104904516 isoform X2	513	112	-2.197	3.09236	1.164e-05	0.0001784
c95071_g1	bZIP transcription factor bZIP122 isoform X1///bZIP transcription factor family 2///BZIP transcription factor	888	200	-2.152	3.88821	1.167e-05	0.0001787
c80845_g1	60 kDa jasmonate-induced -like	1802	415	-2.12	4.91246	1.203e-05	0.0001841
c77435_g2	isoflavone reductase	140	632	2.171	3.39392	1.205e-05	0.0001843
c89107_g1	chalcone synthase	1393	5967	2.096	6.64027	1.218e-05	0.000186
c77625_g2	disease resistance RGA3///disease resistance RGA1	91	14	-2.692	0.563533	1.234e-05	0.0001884
c76043_g1	ubiquinol oxidase mitochondrial-like///ubiquinol oxidase mitochondrial	24	134	2.473	1.13393	1.306e-05	0.0001992
c88709_g3	light-regulated -like	1834	426	-2.108	4.94012	1.325e-05	0.0002019
c76422_g5	disease resistance RGA1 isoform X1	2	35	4.045	-0.848203	1.328e-05	0.0002024
c86592_g1	12-oxophytodienoate reductase 3-like///12-oxophytodienoate reductase 3	1066	4540	2.088	6.24778	1.336e-05	0.0002033
c90558_g1	Fgenesh 35	45	4	-3.454	-0.476822	1.342e-05	0.0002042
c84844_g11	probable linoleate 9S-lipoxygenase 5	185	36	-2.36	1.60918	1.347e-05	0.0002047
c82745_g3	hypothetical protein BVRB_8g200520///hypothetical protein SOVF_018410	99	16	-2.622	0.690172	1.356e-05	0.000206
c87195_g3	poly///hypothetical protein VITISV_041217///Retrovirus-related Pol poly from transposon TNT 1-94	11	77	2.791	0.317696	1.364e-05	0.000207
c80781_g3	---NA---///Squamosa promoter-binding 1	172	33	-2.38	1.50276	1.366e-05	0.0002072
c77957_g2	GDSL-like Lipase Acylhydrolase superfamily isoform 1	12	81	2.74	0.394043	1.448e-05	0.0002195
c58768_g2	PREDICTED: uncharacterized protein LOC104897695	23	0	-7.533	-1.44997	1.497e-05	0.0002253
c61554_g1	PREDICTED: uncharacterized protein LOC104896745	23	0	-7.533	-1.44997	1.497e-05	0.0002253
c67911_g1	2-alkenal reductase (NADP(+)-dependent)-like	23	0	-7.533	-1.44997	1.497e-05	0.0002253
c69442_g2	hypothetical protein BVRB_6g130640	23	0	-7.533	-1.44997	1.497e-05	0.0002253
c74158_g6	probable LRR receptor-like serine threonine- kinase At3g47570	0	23	7.53	-1.45079	1.497e-05	0.0002253
c74665_g1	F-box At1g49610	0	23	7.53	-1.45079	1.497e-05	0.0002253
c75097_g8	retroelement pol poly	23	0	-7.533	-1.44997	1.497e-05	0.0002253
c78346_g1	PREDICTED: uncharacterized protein LOC104898079	23	0	-7.533	-1.44997	1.497e-05	0.0002253
c89798_g3	PREDICTED: uncharacterized protein LOC104901041	23	0	-7.533	-1.44997	1.497e-05	0.0002253
c93987_g3	nucleosome assembly 1 2///nucleosome assembly 1 2-like	23	0	-7.533	-1.44997	1.497e-05	0.0002253
c80561_g1	PREDICTED: uncharacterized protein LOC104889802///hypothetical protein SOVF_047330 isoform A///hypothetical protein VITISV_000123	1553	363	-2.099	4.70235	1.503e-05	0.0002261
c88604_g3	leucine-rich repeat extensin 2	2594	613	-2.083	5.44427	1.508e-05	0.0002265
c75206_g11	PREDICTED: uncharacterized protein LOC104893521	1	29	4.692	-1.11826	1.579e-05	0.0002369
c76794_g2	lupeol synthase-like	1	29	4.692	-1.11826	1.579e-05	0.0002369
c82465_g1	ALTERED XYLOGLUCAN 4	5	49	3.258	-0.347824	1.59e-05	0.0002384
c82129_g1	transport Sec61 subunit beta-like	475	106	-2.165	2.98773	1.606e-05	0.0002406
c85733_g1	serine hydroxymethyltransferase 7-like	374	82	-2.19	2.64092	1.652e-05	0.0002473
c68054_g1	---NA---	19	110	2.523	0.849386	1.679e-05	0.0002512
c89145_g1	E3 ubiquitin- ligase	169	33	-2.354	1.48189	1.689e-05	0.0002525
c68664_g1	BTB POZ domain-containing At3g56230-like	4	44	3.417	-0.505348	1.698e-05	0.0002536
c79058_g8	disease resistance RGA2-like	4	44	3.417	-0.505348	1.698e-05	0.0002536
c74424_g4	zinc finger BED domain-containing RICESLEEPER 2-like	1831	434	-2.079	4.94329	1.704e-05	0.0002543
c69831_g1	caffeic acid 3-O-methyltransferase-like	2	34	4.003	-0.883818	1.771e-05	0.0002638
c72018_g3	disease resistance RGA4///Leucine-rich repeat containing///disease resistance RGA1 isoform X1	34	2	-4.008	-0.882863	1.771e-05	0.0002638
c69428_g1	ankyrin repeat-containing At3g12360-like///ankyrin repeat-containing At3g12360-like isoform X1	3	39	3.644	-0.682207	1.776e-05	0.0002642
c93758_g1	FK506-binding 5-like	3	39	3.644	-0.682207	1.776e-05	0.0002642
c93461_g7	ABC transporter C family member 14-like isoform X1	45	218	2.271	1.85475	1.807e-05	0.0002686
c76940_g5	Zinc finger CONSTANS-LIKE 6	197	40	-2.299	1.70829	1.83e-05	0.0002719
c78515_g7	disease resistance RGA2-like	20	113	2.488	0.892136	1.91e-05	0.0002835
c79387_g3	retrotransposon Ty1-copia subclass	9	66	2.855	0.09794	1.923e-05	0.0002853
c76272_g7	PREDICTED: uncharacterized protein LOC105951653///PREDICTED: uncharacterized protein LOC102624694 isoform X1	16	96	2.573	0.6521	1.936e-05	0.000287
c87542_g1	Aspartate aminotransferase isoform 1	117	21	-2.473	0.945108	1.949e-05	0.0002887
c91166_g7	phosphatidylethanolamine binding///PREDICTED: uncharacterized protein LOC104892530	2183	525	-2.058	5.20059	1.97e-05	0.0002917
c79872_g1	RNA-binding family isoform 1	5	48	3.229	-0.372908	1.977e-05	0.0002924
c70303_g1	peamaclein-like	57	7	-3.006	-0.117253	1.986e-05	0.0002937
c72700_g1	allantoinase	151	652	2.107	3.45045	2.003e-05	0.0002959
c72909_g2	aspartic ase nepenthesin-1	1033	245	-2.078	4.11962	2.05e-05	0.0003027
c79264_g2	F-box LRR-repeat	31	158	2.343	1.38654	2.053e-05	0.0003028
c85478_g6	zinc finger At1g68190	228	48	-2.247	1.92469	2.058e-05	0.0003033
c87089_g1	Subtilase family///cucumisin-like	166	33	-2.329	1.46072	2.092e-05	0.0003082
c84429_g1	PREDICTED: uncharacterized protein LOC103343557///PREDICTED: uncharacterized protein LOC101212789///uncharacterized LOC100194135	391	88	-2.152	2.7113	2.12e-05	0.0003121
c65200_g2	germin subfamily 1 member 15	67	305	2.182	2.34864	2.137e-05	0.0003144
c94200_g1	AC079604_5 copia-type///copia-type poly	58	268	2.203	2.16038	2.158e-05	0.0003172
c86181_g1	polygalacturonase inhibitor-like	622	2568	2.043	5.43516	2.179e-05	0.0003201
c4248_g1	cytosolic class I small heat shock partial	28	1	-4.646	-1.16043	2.196e-05	0.0003207
c56329_g5	uncharacterized mitochondrial g00810-like	22	0	-7.469	-1.50443	2.21e-05	0.0003207
c56597_g1	ribonuclease H At1g65750-like///PREDICTED: uncharacterized protein LOC104904177	22	0	-7.469	-1.50443	2.21e-05	0.0003207
c63722_g1	meiotic recombination DMC1 homolog	0	22	7.466	-1.50523	2.21e-05	0.0003207
c66974_g3	PREDICTED: uncharacterized protein LOC104899534	0	22	7.466	-1.50523	2.21e-05	0.0003207
c67489_g1	probable nucleoredoxin 1	0	22	7.466	-1.50523	2.21e-05	0.0003207
c68001_g4	PREDICTED: uncharacterized protein LOC104885170///PREDICTED: uncharacterized protein LOC104899180///PREDICTED: uncharacterized protein LOC104893474	1	28	4.642	-1.16132	2.196e-05	0.0003207
c71260_g1	nuclease HARBI1	22	0	-7.469	-1.50443	2.21e-05	0.0003207
c71929_g5	non-LTR retroelement reverse transcriptase	0	22	7.466	-1.50523	2.21e-05	0.0003207
c75325_g2	PREDICTED: uncharacterized protein LOC104908122///serine threonine- phosphatase 7 long form homolog	0	22	7.466	-1.50523	2.21e-05	0.0003207
c75344_g1	F-box FBD LRR-repeat At5g56420-like	22	0	-7.469	-1.50443	2.21e-05	0.0003207
c76766_g2	PREDICTED: uncharacterized protein LOC100241465///hypothetical protein B456_005G011500	0	22	7.466	-1.50523	2.21e-05	0.0003207
c79039_g8	PREDICTED: uncharacterized protein LOC103863319	22.3	0	-7.488	-1.48788	2.21e-05	0.0003207
c79421_g3	PREDICTED: uncharacterized protein LOC104891627	21.56	0	-7.44	-1.52906	2.21e-05	0.0003207
c89891_g6	probable serine threonine- kinase At1g18390	0	22	7.466	-1.50523	2.21e-05	0.0003207
c89954_g2	ribonuclease H At1g65750	0	22	7.466	-1.50523	2.21e-05	0.0003207
c89986_g7	ribonuclease H At1g65750	0	22	7.466	-1.50523	2.21e-05	0.0003207
c92978_g1	serine threonine- phosphatase 6 regulatory ankyrin repeat subunit A-like isoform X2	28	1	-4.646	-1.16043	2.196e-05	0.0003207
c72295_g1	cytochrome P450 CYP72A219-like	13	82	2.643	0.423495	2.292e-05	0.000332
c85717_g1	FAR1-RELATED SEQUENCE 5-like	13	82	2.643	0.423495	2.292e-05	0.000332
c92365_g9	serine threonine- phosphatase 6 regulatory ankyrin repeat subunit A-like isoform X1	3	38	3.606	-0.713907	2.307e-05	0.0003338
c95178_g2	---NA---	3	38	3.606	-0.713907	2.307e-05	0.0003338
c80110_g10	disease resistance RGA3///disease resistance RGA2-like	2	33	3.96	-0.920335	2.37e-05	0.0003425
c93855_g1	transcription factor ORG2	33	2	-3.965	-0.919398	2.37e-05	0.0003425
c78354_g2	CLH0_CHEAL ame: Full=Chlorophyllase type 0 ame: Full= 0 ame: Full=Chlorophyll-chlorophyllido hydrolase 0 Short=Chlase 0 Flags: Precursor	804	3286	2.029	5.79331	2.378e-05	0.0003433
c82021_g1	PREDICTED: uncharacterized protein LOC104905882	49	229	2.219	1.93362	2.421e-05	0.0003493
c92477_g5	EXORDIUM-like 2	3290	810	-2.024	5.79826	2.434e-05	0.0003509
c79323_g3	sterol 3-beta-glucosyltransferase UGT80A2-like	11	73	2.714	0.253585	2.481e-05	0.0003574
c77335_g5	PREDICTED: uncharacterized protein LOC104889331	506	118	-2.102	3.09005	2.537e-05	0.0003653
c73475_g7	RNA polymerase II largest subunit	77	12	-2.672	0.334474	2.561e-05	0.0003685
c89123_g9	Disease resistance	81	13	-2.63	0.41003	2.629e-05	0.0003781
c91577_g1	caffeic acid 3-O-methyltransferase-like	146	617	2.076	3.37712	2.671e-05	0.0003838
c69602_g3	retroelement pol poly -like	64	8.61	-2.878	0.054759	2.692e-05	0.0003863
c69886_g1	UPF0481 At3g47200-like	9	64	2.811	0.060957	2.692e-05	0.0003863
c84970_g1	floral homeotic PMADS 2-like	2940	11794	2.002	7.64127	2.706e-05	0.000388
c94465_g1	pentatricopeptide repeat-containing At3g49710	115	491	2.091	3.04671	2.729e-05	0.0003911
c81488_g10	PREDICTED: uncharacterized protein LOC104597773///PREDICTED: uncharacterized protein LOC102661920	42	4	-3.355	-0.560908	2.739e-05	0.0003919
c86673_g5	transcription initiation factor TFIID subunit 7 isoform X2	42	4	-3.355	-0.560908	2.739e-05	0.0003919
c90537_g3	---NA---	729	175	-2.06	3.62198	2.766e-05	0.0003956
c81662_g1	LINE-1 reverse transcriptase homolog	16	93	2.527	0.614309	2.779e-05	0.0003972
c85470_g1	haloacid dehalogenase-like hydrolase domain-containing 3	1517	373	-2.026	4.68266	2.812e-05	0.0004016
c87039_g5	rotamase FKBP 1	109	20	-2.441	0.850628	2.895e-05	0.0004131
c86546_g2	aspartic ase PCS1///aspartic ase PCS1-like	1032	252	-2.036	4.12635	2.911e-05	0.0004151
c87207_g1	F-box LRR-repeat At3g59160 isoform X3	25	129	2.359	1.09788	2.966e-05	0.0004227
c66632_g1	probable pectinesterase pectinesterase inhibitor 21	37	3	-3.573	-0.745354	3.007e-05	0.0004276
c70514_g1	tetraspanin-7-like isoform X1	3	37	3.568	-0.746321	3.007e-05	0.0004276
c80945_g1	G-type lectin S-receptor-like serine threonine- kinase RLK1	3	37	3.568	-0.746321	3.007e-05	0.0004276
c89234_g1	potassium transporter 5-like	324	74	-2.131	2.44646	3.046e-05	0.000433
c72336_g1	PREDICTED: uncharacterized protein LOC104891244///PREDICTED: uncharacterized protein LOC104900107	1	27	4.589	-1.2057	3.071e-05	0.0004353
c86762_g1	dihydroflavonol 4-reductase	1	27	4.589	-1.2057	3.071e-05	0.0004353
c89837_g4	PREDICTED: uncharacterized protein LOC104884717	1	27	4.589	-1.2057	3.071e-05	0.0004353
c91300_g2	pectinesterase-like	1	27	4.589	-1.2057	3.071e-05	0.0004353
c84062_g1	hypothetical protein SOVF_074280	485	115	-2.078	3.03382	3.17e-05	0.0004491
c71366_g1	vacuolar-processing enzyme-like	2	32	3.916	-0.957801	3.186e-05	0.00045
c75706_g1	phosphatidylinositol phosphatidylcholine transfer SFH12-like///phosphatidylinositol phosphatidylcholine transfer SFH12-like isoform X1	18	100	2.463	0.724864	3.186e-05	0.00045
c76969_g6	PREDICTED: uncharacterized protein LOC104887201	32	2	-3.92	-0.956882	3.186e-05	0.00045
c77856_g1	peptidyl-prolyl cis-trans isomerase FKBP62	196	42.03	-2.22	1.71443	3.188e-05	0.00045
c85979_g2	monothiol glutaredoxin-S9-like	2	32	3.916	-0.957801	3.186e-05	0.00045
c65200_g1	germin 2-1	32	156	2.279	1.37906	3.234e-05	0.0004562
c44050_g1	GTP cyclohydrolase 1-like	21	0	-7.402	-1.56103	3.288e-05	0.0004596
c61137_g1	ATP-dependent DNA helicase PIF2-like	0	21	7.4	-1.5618	3.288e-05	0.0004596
c69080_g2	FBD-associated F-box	21	0	-7.402	-1.56103	3.288e-05	0.0004596
c70351_g5	strictosidine synthase 1-like	21	0	-7.402	-1.56103	3.288e-05	0.0004596
c72443_g4	inactive RESTRICTED TEV MOVEMENT 1-like	21	0	-7.402	-1.56103	3.288e-05	0.0004596
c72487_g3	hypothetical protein BVRB_2g034440	21	0	-7.402	-1.56103	3.288e-05	0.0004596
c73891_g8	disease resistance RGA1	0	21	7.4	-1.5618	3.288e-05	0.0004596
c73972_g2	PREDICTED: uncharacterized protein LOC104896745///PREDICTED: uncharacterized protein LOC104213043	21	0	-7.402	-1.56103	3.288e-05	0.0004596
c75310_g1	PREDICTED: uncharacterized protein LOC104887761	21	0	-7.402	-1.56103	3.288e-05	0.0004596
c75834_g5	F-box and associated interaction domains-containing isoform 1	21	0	-7.402	-1.56103	3.288e-05	0.0004596
c80332_g10	retrotransposon poly	21	0	-7.402	-1.56103	3.288e-05	0.0004596
c84200_g1	nuclease HARBI1	21	0	-7.402	-1.56103	3.288e-05	0.0004596
c85793_g8	---NA---	21	0	-7.402	-1.56103	3.288e-05	0.0004596
c88791_g1	retroelement pol poly///AC025782_3 Ty1 copia-element poly///PREDICTED: uncharacterized protein LOC104906607///hypothetical protein BVRB_5g104790	21	0	-7.402	-1.56103	3.288e-05	0.0004596
c90913_g2	ribonuclease H At1g65750///PREDICTED: uncharacterized protein LOC104898724///polynucleotidyl ribonuclease H-like superfamily	53	239	2.168	2.00352	3.292e-05	0.0004598
c78083_g3	PREDICTED: uncharacterized protein LOC104901352///---NA---	6	50	3.03	-0.298904	3.335e-05	0.0004651
c93499_g1	conserved hypothetical protein	50	6	-3.035	-0.297853	3.335e-05	0.0004651
c89350_g1	cysteine-rich receptor kinase 10	71	11	-2.679	0.221565	3.365e-05	0.0004691
c84134_g1	hypothetical protein SOVF_028290	79	13	-2.594	0.380273	3.47e-05	0.0004833
c71073_g1	pyruvate decarboxylase 2	41	4	-3.32	-0.590063	3.491e-05	0.0004857
c71726_g1	hypothetical protein BVRB_4g072240///PREDICTED: uncharacterized protein LOC104908285///Proline--tRNA ligase	4	41	3.315	-0.591055	3.491e-05	0.0004857
c93766_g7	DPH4 homolog	30	147	2.286	1.29394	3.506e-05	0.0004874
c90547_g1	inositol transporter 4-like///inositol transporter 4-like isoform X1	328	76	-2.11	2.46783	3.517e-05	0.0004886
c74559_g2	metal-nicotianamine transporter YSL3-like isoform X1	7	54	2.923	-0.183435	3.532e-05	0.00049
c89129_g4	S-type anion channel SLAH1-like	7	54	2.923	-0.183435	3.532e-05	0.00049
c82739_g3	B3 domain-containing At2g33720-like	131	26	-2.33	1.12627	3.543e-05	0.0004912
c76067_g3	palmitoyl- thioesterase 1-like///palmitoyl- thioesterase 1	292	67	-2.124	2.29922	3.616e-05	0.000501
c79382_g1	E3 ubiquitin ligase RIE1///E3 ubiquitin ligase RIE1-like	58	8	-2.841	-0.075443	3.679e-05	0.0005095
c85749_g2	probable serine threonine- kinase RLCKVII	720	2841	1.978	5.59372	3.725e-05	0.0005154
c77090_g1	glutaredoxin-C9-like	150	31	-2.272	1.32674	3.776e-05	0.0005221
c90982_g1	receptor 12	30	146	2.276	1.28595	3.794e-05	0.0005243
c82782_g1	replication A 70 kDa DNA-binding subunit B-like///jasmonate induced	310	72	-2.107	2.38786	3.843e-05	0.0005307
c45158_g1	delta(7)-sterol-C5(6)-desaturase-like	45	5	-3.141	-0.449873	3.85e-05	0.0005313
c87167_g3	isochorismatase hydrolase family///nicotinamidase 2///nicotinamidase 2-like	66	10	-2.71	0.117217	3.869e-05	0.0005336
c78270_g2	F-box PP2-B12	39	181	2.208	1.60144	3.884e-05	0.0005353
c85994_g2	abscisic-aldehyde oxidase-like isoform X1	114	473	2.049	3.00107	3.889e-05	0.0005356
c79303_g1	beta-amyrin 28-oxidase-like	59	259	2.129	2.12499	3.9e-05	0.0005368
c94210_g1	stachyose synthase-like	122	24	-2.342	1.02417	3.906e-05	0.0005373
c86208_g1	non-functional NADPH-dependent codeinone reductase 2-like	60	262	2.122	2.1428	4.061e-05	0.0005582
c79380_g1	ABA-inducible PHV A1-like///late embryogenesis	49	6	-3.006	-0.322107	4.109e-05	0.0005645
c92682_g9	ribonuclease H At1g65750	38	176	2.205	1.56228	4.172e-05	0.0005728
c79194_g3	wall-associated receptor kinase-like 16	53	7	-2.901	-0.204741	4.292e-05	0.0005889
c85782_g1	ribonuclease H At1g65750	31	2	-3.875	-0.995366	4.299e-05	0.0005894
c67019_g1	hypothetical protein SOVF_160550	26	1	-4.54	-1.25065	4.319e-05	0.0005906
c75614_g2	---NA---	1	26	4.535	-1.25149	4.319e-05	0.0005906
c78100_g1	SNF1-related kinase regulatory subunit gamma-1-like	26	1	-4.54	-1.25065	4.319e-05	0.0005906
c79386_g1	21 kDa///21 kDa -like	26	1	-4.54	-1.25065	4.319e-05	0.0005906
c81791_g2	wall-associated receptor kinase 2-like	57	8	-2.816	-0.096207	4.419e-05	0.0006039
c81164_g2	probably inactive receptor kinase At2g46850	30	144	2.256	1.26984	4.447e-05	0.0006071
c86363_g2	early nodulin-93-like	80	337	2.071	2.51174	4.448e-05	0.0006071
c71926_g1	PREDICTED: uncharacterized protein LOC104908911	61	9	-2.746	0.004729	4.503e-05	0.0006142
c75800_g9	probable mitochondrial chaperone BCS1-B	17	93	2.441	0.627032	4.514e-05	0.0006153
c82211_g5	abscisic acid 8 -hydroxylase 1-like///abscisic acid 8 -hydroxylase 1	89	16	-2.469	0.563501	4.541e-05	0.0006186
c92026_g2	potassium channel AKT1-like	15	85	2.49	0.494591	4.565e-05	0.0006214
c86088_g1	aluminum-activated malate transporter 2-like	27	132	2.282	1.14284	4.573e-05	0.0006221
c80515_g2	transcription factor TGA2 isoform X1	506	1969	1.958	5.06958	4.611e-05	0.0006269
c82196_g1	PREDICTED: uncharacterized protein LOC104906040 isoform X1///PREDICTED: uncharacterized protein LOC104906040 isoform X2	128	26	-2.296	1.09913	4.618e-05	0.0006274
c82512_g3	mannose glucose-specific lectin-like	86161	22549	-1.936	10.5256	4.622e-05	0.0006276
c95307_g2	disease resistance RGA3	7389	1928	-1.941	6.9817	4.631e-05	0.0006284
c88636_g1	LRR receptor-like serine threonine- kinase ERECTA	54	236	2.123	1.99375	4.641e-05	0.0006293
c91435_g2	probable alpha,alpha-trehalose-phosphate synthase///probable alpha,alpha-trehalose-phosphate synthase [UDP-forming] 9	1741	448	-1.96	4.89411	4.709e-05	0.0006381
c92016_g2	---NA---	63	270	2.095	2.19068	4.758e-05	0.0006444
c83666_g1	ethylene-responsive transcription factor 4-like	636	159	-2.002	3.43746	4.763e-05	0.0006446
c77644_g3	F-box LRR-repeat At3g18150	74	312	2.072	2.4014	4.782e-05	0.0006467
c78961_g4	enhancer of mRNA-decapping 4-like isoform X1///enhancer of mRNA-decapping 4	44	5	-3.108	-0.476848	4.829e-05	0.0006527
c15579_g2	PREDICTED: uncharacterized protein LOC104903416	20	0	-7.332	-1.61993	4.933e-05	0.0006599
c57396_g1	serine threonine- phosphatase 7 long form homolog	20	0	-7.332	-1.61993	4.933e-05	0.0006599
c67202_g1	poly from transposon TNT	20	0	-7.332	-1.61993	4.933e-05	0.0006599
c71817_g2	F-box FBD LRR-repeat At5g56420-like	20	0	-7.332	-1.61993	4.933e-05	0.0006599
c73996_g8	serine threonine- kinase HT1-like	20	0	-7.332	-1.61993	4.933e-05	0.0006599
c74749_g12	retroelement pol poly	20.33	0	-7.356	-1.60023	4.933e-05	0.0006599
c76751_g1	---NA---	0	20	7.33	-1.62068	4.933e-05	0.0006599
c78646_g7	acidic mammalian chitinase-like	20	0	-7.332	-1.61993	4.933e-05	0.0006599
c81980_g9	G-type lectin S-receptor-like serine threonine- kinase At1g11330	0	20	7.33	-1.62068	4.933e-05	0.0006599
c82019_g3	PREDICTED: uncharacterized protein LOC106435702 isoform X1	20	0	-7.332	-1.61993	4.933e-05	0.0006599
c82595_g1	ADP-ribosylation factor 8A///---NA---	16961	4454	-1.931	8.18203	4.889e-05	0.0006599
c84153_g6	retrotransposon poly	0	20	7.33	-1.62068	4.933e-05	0.0006599
c84153_g7	B3 domain-containing At2g31420-like	20	0	-7.332	-1.61993	4.933e-05	0.0006599
c84982_g6	Retrovirus-related Pol poly from transposon TNT 1-94	0	20	7.33	-1.62068	4.933e-05	0.0006599
c87834_g4	ribosomal S10 (mitochondrion)	0	20	7.33	-1.62068	4.933e-05	0.0006599
c89548_g5	NB-ARC domain-containing disease resistance	0	20	7.33	-1.62068	4.933e-05	0.0006599
c87399_g1	globulin-1 S allele	88	16	-2.453	0.5502	5.143e-05	0.0006876
c79617_g6	disease resistance RGA2-like	3	35	3.488	-0.813417	5.157e-05	0.0006877
c81315_g10	vicilin-like antimicrobial peptides 2-2	35	3	-3.493	-0.812485	5.157e-05	0.0006877
c83392_g6	LRR receptor-like kinase family///leucine-rich repeat receptor kinase EXS-like///LRR receptor-like serine threonine- kinase FLS2///receptor 12///probable LRR receptor-like serine threonine- kinase At4g36180	3	35	3.488	-0.813417	5.157e-05	0.0006877
c87493_g2	PREDICTED: uncharacterized protein LOC104901353	3	35	3.488	-0.813417	5.157e-05	0.0006877
c93151_g4	cyclic dof factor 1 isoform X1	249	58	-2.102	2.07615	5.187e-05	0.0006913
c88379_g3	PREDICTED: uncharacterized protein LOC104906607///retroelement pol poly	52	7	-2.873	-0.227467	5.226e-05	0.000696
c73689_g1	probable methyltransferase PMT2	161	35	-2.2	1.43921	5.277e-05	0.0007024
c95001_g1	indole-3-acetic acid-induced ARG7-like	9	60	2.718	-0.015983	5.359e-05	0.0007129
c91667_g2	cysteine-rich receptor kinase 10///receptor kinase At4g00960	637	161	-1.986	3.44286	5.392e-05	0.0007168
c72476_g2	methyltransferase domain-containing	130	27	-2.265	1.12626	5.438e-05	0.000722
c89429_g3	---NA---	130	26.63	-2.284	1.12294	5.438e-05	0.000722
c85191_g1	PREDICTED: uncharacterized protein LOC104905400 isoform X2///myeloid leukemia factor 1 isoform X1	164	36	-2.186	1.46778	5.588e-05	0.0007415
c94684_g3	probable leucine-rich repeat receptor kinase At5g49770	55	236	2.096	1.99866	5.606e-05	0.0007433
c84997_g1	scopoletin glucosyltransferase-like	198	45	-2.137	1.74374	5.647e-05	0.0007483
c75163_g1	---NA---	146	578	1.982	3.30185	5.769e-05	0.000764
c92464_g1	---NA---///F-box At4g22280-like	30	2	-3.828	-1.0349	5.826e-05	0.000771
c92429_g1	serine carboxypeptidase-like 18///serine carboxypeptidase-like 18 isoform X1	81	333	2.035	2.50143	5.859e-05	0.0007749
c69753_g1	PREDICTED: uncharacterized protein LOC104906765	146	576	1.977	3.29789	6.012e-05	0.0007946
c73475_g6	RNA polymerase II largest subunit	125	26	-2.262	1.07146	6.036e-05	0.0007974
c87158_g2	EIN3-binding F-box 1-like	1949	7331	1.909	6.97457	6.048e-05	0.0007984
c81961_g3	FAR1-RELATED SEQUENCE 5-like	758	195	-1.96	3.69778	6.067e-05	0.0008005
c69124_g1	L-tryptophan--pyruvate aminotransferase 1-like///L-tryptophan--pyruvate aminotransferase 1	1	25	4.479	-1.29879	6.107e-05	0.0008037
c71937_g1	ethylene-responsive transcription factor ERF023-like	1	25	4.479	-1.29879	6.107e-05	0.0008037
c74311_g2	receptor 12	25	1	-4.483	-1.29797	6.107e-05	0.0008037
c79011_g2	ribosome-inactivating PD-L1 PD-L2-like///RIP2_PHYAM ame: Full=Antiviral 2 ame: Full=PAP-II ame: Full=Ribosome-inactivating ame: Full=rRNA N-glycosidase Flags: Precursor	20655	77394.7	1.903	10.3753	6.103e-05	0.0008037
c81497_g2	Peptidyl-prolyl cis-trans isomerase family	6	47	2.941	-0.372883	6.273e-05	0.0008245
c84542_g1	exopolygalacturonase-like	47	6	-2.946	-0.371874	6.273e-05	0.0008245
c67754_g1	thioredoxin H2-like	77	316	2.033	2.42707	6.297e-05	0.0008272
c70719_g2	phospholipase A-2-activating -like///phospholipase A-2-activating	166	37	-2.164	1.48884	6.323e-05	0.0008301
c91545_g7	PREDICTED: uncharacterized protein LOC104906988	147	577	1.969	3.30186	6.36e-05	0.0008344
c82444_g1	seed biotin-containing SBP65	658	169	-1.963	3.49411	6.366e-05	0.0008347
c76653_g1	poly	55	8	-2.765	-0.138655	6.403e-05	0.0008389
c75506_g1	cysteine-rich receptor kinase 25	27	128	2.237	1.10701	6.474e-05	0.0008473
c85488_g5	B3 domain-containing Os01g0723500-like	90	17	-2.398	0.589725	6.473e-05	0.0008473
c90896_g5	Disease resistance family LRR family///receptor 12///Leucine-rich repeat receptor-like serine threonine- kinase	15	82	2.439	0.452375	6.749e-05	0.0008827
c73789_g1	kunitz-type trypsin inhibitor alpha chain-like	34	3	-3.451	-0.84726	6.787e-05	0.0008871
c93870_g3	zinc transporter 11	20	101	2.327	0.759929	6.804e-05	0.0008888
c71201_g2	xylosyltransferase 2	838	219	-1.938	3.84661	6.97e-05	0.0009099
c88808_g2	UDP-glycosyltransferase 73B4-like///UDP-glycosyltransferase 90A1-like	183	42	-2.122	1.63456	7.072e-05	0.0009226
c78792_g2	NRT1 PTR FAMILY -like	59	246	2.055	2.06555	7.124e-05	0.0009288
c65550_g1	mitochondrial import inner membrane translocase subunit TIM50-like	145	564	1.956	3.27183	7.139e-05	0.0009302
c94804_g3	ADP-ribosylation factor 1-like isoform X1///ADP-ribosylation factor 1-like///ADP-ribosylation factor 1-like isoform X2	12	70	2.53	0.220446	7.196e-05	0.000937
c93634_g5	codeine O-demethylase-like	961	253	-1.927	4.0457	7.214e-05	0.0009388
c77917_g6	U-box domain-containing 35-like	38	4	-3.211	-0.681235	7.353e-05	0.0009551
c79611_g8	poly	4	38	3.206	-0.682179	7.353e-05	0.0009551
c86722_g1	3 -N-debenzoyl-2 -deoxytaxol N-benzoyltransferase-like	4	38	3.206	-0.682179	7.353e-05	0.0009551
c87791_g3	succinate dehydrogenase assembly factor mitochondrial	808	212	-1.932	3.7954	7.4e-05	0.0009606
c16898_g1	chymotrypsin inhibitor 3-like	19	0	-7.259	-1.68135	7.462e-05	0.000961
c61499_g3	pentatricopeptide repeat-containing At1g63330-like isoform X2	19	0	-7.259	-1.68135	7.462e-05	0.000961
c61942_g1	PREDICTED: uncharacterized protein LOC104890362	0	19	7.256	-1.68207	7.462e-05	0.000961
c63007_g2	---NA---	19	0	-7.259	-1.68135	7.462e-05	0.000961
c65382_g1	beta-amyrin 28-oxidase-like	19	0	-7.259	-1.68135	7.462e-05	0.000961
c77247_g4	FAR1-RELATED SEQUENCE 5-like	19	0	-7.259	-1.68135	7.462e-05	0.000961
c77270_g3	F-box At3g58860	19	0	-7.259	-1.68135	7.462e-05	0.000961
c80974_g14	---NA---	0	19	7.256	-1.68207	7.462e-05	0.000961
c83274_g4	beta-amyrin synthase	19	0	-7.259	-1.68135	7.462e-05	0.000961
c84486_g5	receptor 12///LRR receptor-like serine threonine- kinase GSO2///Disease resistance family LRR family	0	19	7.256	-1.68207	7.462e-05	0.000961
c85532_g6	DNA RNA polymerases superfamily	0	19	7.256	-1.68207	7.462e-05	0.000961
c86190_g1	probable LRR receptor-like serine threonine- kinase At3g47570	19	0	-7.259	-1.68135	7.462e-05	0.000961
c89039_g6	ARM repeat containing	0	19	7.256	-1.68207	7.462e-05	0.000961
c73656_g5	actin-82 isoform X1///actin-11///actin	35	156	2.15	1.40145	7.554e-05	0.0009722
c83986_g2	beta-carotene isomerase chloroplastic	484	124	-1.966	3.05278	7.568e-05	0.0009734
c78052_g1	flotillin 4	5	42	3.037	-0.533329	7.651e-05	0.0009829
c80610_g1	Ribosomal RNA small subunit methyltransferase	42	5	-3.041	-0.532358	7.651e-05	0.0009829
c86414_g1	sugar transporter ERD6-like 5	277	1046	1.914	4.16801	7.681e-05	0.0009861
c79983_g1	G-type lectin S-receptor-like serine threonine- kinase At1g11330///G-type lectin S-receptor-like serine threonine- kinase SD1-13///G-type lectin S-receptor-like serine threonine- kinase At1g11330 isoform X1	163	37	-2.138	1.46777	7.776e-05	0.0009978
c86194_g1	(3S,6E)-nerolidol synthase 1-like	96	19	-2.332	0.690127	7.795e-05	0.0009995
c66681_g1	peroxidase 72-like	2	29	3.774	-1.07642	7.929e-05	0.001015
c76041_g1	NAD(H) kinase 1	2	29	3.774	-1.07642	7.929e-05	0.001015
c84605_g4	animal RPA1 domain///replication factor-A carboxy-terminal domain	29	2	-3.779	-1.07556	7.929e-05	0.001015
c91343_g2	DNA-directed RNA polymerases II and IV subunit 5A///DNA-directed RNA polymerases II and IV subunit 5A-like	306	76	-2.01	2.38783	7.971e-05	0.00102
c82732_g1	allene oxide synthase-like	82	327	1.992	2.48408	8.258e-05	0.001056
c90551_g5	PREDICTED: uncharacterized protein LOC102660344	69	12	-2.514	0.204667	8.372e-05	0.00107
c84621_g1	3-demethylubiquinone-9 3-methyltransferase domain	14746	53714	1.863	9.85711	8.576e-05	0.001094
c93652_g1	DPP6 N-terminal domain///hypothetical protein SOVF_193570	678	179	-1.923	3.54526	8.566e-05	0.001094
c95325_g4	disease resistance RGA3	253	949	1.904	4.03008	8.579e-05	0.001094
c90177_g1	heat stress transcription factor B-2a	304	76	-2.001	2.38034	8.598e-05	0.001096
c80936_g8	ribonuclease H At1g65750	1	24	4.42	-1.34769	8.687e-05	0.001105
c82380_g1	aluminum-activated malate transporter 12-like	1	24	4.42	-1.34769	8.687e-05	0.001105
c83064_g2	f-box family	1	24	4.42	-1.34769	8.687e-05	0.001105
c72734_g4	linoleate 13S-lipoxygenase 2- chloroplastic-like	456	118	-1.952	2.97031	8.801e-05	0.001119
c78573_g1	2-oxoglutarate mitochondrial-like	10	61	2.591	0.02302	8.861e-05	0.001126
c69589_g1	hypothetical protein SOVF_065510	192	725	1.914	3.64113	8.889e-05	0.001129
c93786_g1	pentatricopeptide repeat-containing mitochondrial-like	1553	421	-1.885	4.74523	8.895e-05	0.001129
c82414_g5	probable alpha,alpha-trehalose-phosphate synthase	172	40	-2.103	1.55024	8.913e-05	0.00113
c77225_g2	threonine aspartase///isoaspartyl peptidase L-asparaginase///threonine aspartase isoform X2	139	31	-2.163	1.23828	8.959e-05	0.001135
c80748_g3	F-box At1g49610///F-box LRR-repeat	33	3	-3.408	-0.882893	8.964e-05	0.001135
c90464_g2	WEAK CHLOROPLAST MOVEMENT UNDER BLUE LIGHT 1-like isoform X2	33	3	-3.408	-0.882893	8.964e-05	0.001135
c72734_g2	linoleate 13S-lipoxygenase 2- chloroplastic-like	310	78	-1.991	2.41008	9.019e-05	0.001141
c92701_g4	monofunctional riboflavin biosynthesis RIBA chloroplastic	38	164	2.104	1.48062	9.344e-05	0.001182
c68905_g1	probable flavin-containing monooxygenase 1	72	13	-2.461	0.271011	9.407e-05	0.001189
c83089_g1	ubiquitin-conjugating enzyme E2 38	51	211	2.044	1.84939	9.466e-05	0.001195
c88078_g1	histone-lysine N-methyltransferase SUVR4	228	851	1.897	3.87489	9.459e-05	0.001195
c81163_g2	bidirectional sugar transporter NEC1-like	114	438	1.938	2.91302	9.646e-05	0.001217
c65472_g2	F-box At5g49610-like	5	41	3.002	-0.56189	9.664e-05	0.001218
c80654_g1	organic cation carnitine transporter 3-like	41	5	-3.007	-0.560935	9.664e-05	0.001218
c94806_g2	trichohyalin-like isoform X1	68	272	1.996	2.22036	9.685e-05	0.001219
c86828_g6	dof zinc finger	560	148	-1.921	3.27112	9.746e-05	0.001226
c91599_g11	bifunctional epoxide hydrolase 2	68	12	-2.493	0.187588	9.749e-05	0.001226
c75747_g3	flavonoid 3 ,5 -methyltransferase-like	25	116	2.206	0.974053	9.802e-05	0.001232
c74972_g2	zinc transporter chloroplastic isoform X1///zinc transporter chloroplastic	1071.16	3877.21	1.853	6.06796	9.89e-05	0.001242
c82525_g2	nucleosome assembly 1 1-like///nucleosome assembly 1 2-like	236	876	1.889	3.91819	9.958e-05	0.00125
c86508_g2	UDP-glycosyltransferase 74F2-like	274	1012	1.882	4.12722	0.0001001	0.001256
c85867_g2	blue copper -like	72	285	1.981	2.28995	0.0001026	0.001286
c87927_g1	hypothetical protein SOVF_020600///PREDICTED: uncharacterized protein LOC103431786	249	62	-2.006	2.09457	0.0001029	0.00129
c79980_g5	HSP20-like chaperone	52	213	2.029	1.86557	0.0001032	0.001292
c88501_g1	polygalacturonase inhibitor	1920	6904	1.844	6.90193	0.0001035	0.001296
c81924_g2	basic leucine zipper 61-like	760	205	-1.892	3.71574	0.0001038	0.001298
c77717_g1	actin-11	102	392	1.939	2.75409	0.0001046	0.001307
c77476_g6	PREDICTED: uncharacterized protein LOC104583720	60	10	-2.572	0.004708	0.0001049	0.001311
c82195_g1	---NA---///osmotic avoidance abnormal 3	17	86	2.328	0.535638	0.0001056	0.001318
c90140_g6	serine threonine- phosphatase 7 long form homolog	108	413	1.931	2.83026	0.000106	0.001322
c68176_g1	Pathogenesis-related thaumatin superfamily	28	2	-3.729	-1.11739	0.0001084	0.00135
c79330_g7	zinc finger MYM-type 1-like	28	2	-3.729	-1.11739	0.0001084	0.00135
c91198_g4	PREDICTED: uncharacterized protein LOC104890822	28	2	-3.729	-1.11739	0.0001084	0.00135
c71259_g5	---NA---	35	151	2.103	1.36399	0.0001087	0.001353
c77160_g1	F-box At3g07870-like	9	56	2.618	-0.097259	0.0001089	0.001355
c81710_g1	DEMETER 2	319	82	-1.961	2.45715	0.0001098	0.001365
c93385_g2	F-box FBD LRR-repeat At1g13570-like///F-box LRR-repeat 25-like	1499	414	-1.858	4.70003	0.0001111	0.00138
c82079_g4	shikimate O-hydroxycinnamoyltransferase-like	149	557	1.899	3.26576	0.0001117	0.001388
c25005_g1	PREDICTED: uncharacterized protein LOC104902987	0	18	7.179	-1.74618	0.0001139	0.001401
c42897_g1	PREDICTED: uncharacterized protein LOC102667520	18	0	-7.181	-1.74549	0.0001139	0.001401
c70206_g3	retroelement pol poly	18	0	-7.181	-1.74549	0.0001139	0.001401
c71428_g2	---NA---	18	0	-7.181	-1.74549	0.0001139	0.001401
c73598_g12	uncharacterized mitochondrial g00810-like	0	18	7.179	-1.74618	0.0001139	0.001401
c75077_g4	ABC transporter G family member 29-like	18	0	-7.181	-1.74549	0.0001139	0.001401
c75183_g1	ethylene-responsive transcription factor ERF113-like	18	0	-7.181	-1.74549	0.0001139	0.001401
c77073_g7	ribonuclease H At1g65750	0	18.26	7.199	-1.72924	0.0001139	0.001401
c80080_g2	---NA---	0	18	7.179	-1.74618	0.0001139	0.001401
c82255_g2	probable L-type lectin-domain containing receptor kinase	18	0	-7.181	-1.74549	0.0001139	0.001401
c82923_g1	PREDICTED: uncharacterized protein LOC104893474///PREDICTED: uncharacterized protein LOC104905839	8	52	2.679	-0.205774	0.0001129	0.001401
c83580_g1	UPF0481 At3g47200-like	8	52	2.679	-0.205774	0.0001129	0.001401
c83828_g8	retrovirus-related Pol poly from transposon TNT 1-94///retrotransposon poly	0	18	7.179	-1.74618	0.0001139	0.001401
c84982_g1	Retrovirus-related Pol poly from transposon TNT 1-94	0	18	7.179	-1.74618	0.0001139	0.001401
c85117_g1	hypothetical protein SOVF_035320///F-box At5g49610-like	12	67	2.466	0.169237	0.0001136	0.001401
c91265_g1	Disease resistance family LRR family///receptor 12///probable LRR receptor-like serine threonine- kinase At4g36180	0	18	7.179	-1.74618	0.0001139	0.001401
c86539_g1	vinorine synthase-like	18	89	2.295	0.588586	0.0001144	0.001406
c85311_g6	cytochrome P450 94A1-like	78	15	-2.371	0.395193	0.0001148	0.001411
c88701_g3	kDa heat shock mitochondrial///heat shock	150	35	-2.098	1.35757	0.000117	0.001437
c75233_g1	subtilisin-like protease	96	20	-2.258	0.702189	0.0001179	0.001448
c86812_g6	probable carboxylesterase 7	32	3	-3.364	-0.919428	0.0001188	0.001458
c94022_g4	PREDICTED: uncharacterized protein LOC104904242	44	6	-2.851	-0.449899	0.0001201	0.001473
c52090_g2	Aldehyde dehydrogenase family 3 member F1	1	23	4.359	-1.3983	0.0001243	0.001521
c83165_g2	anthocyanidin 3-O-glucoside 2 -O-glucosyltransferase-like	1	23	4.359	-1.3983	0.0001243	0.001521
c94882_g1	PREDICTED: uncharacterized protein LOC104892696///PREDICTED: uncharacterized protein LOC104898740	23	1	-4.364	-1.39753	0.0001243	0.001521
c80354_g2	spermidine hydroxycinnamoyl transferase	16	81	2.328	0.452392	0.0001251	0.00153
c84642_g2	receptor kinase HSL1	117	26	-2.167	0.994985	0.0001251	0.00153
c71059_g1	MLP 43	44	181	2.035	1.63333	0.0001254	0.001531
c85002_g8	two-component response regulator-like APRR2-like isoform X2///DNA binding	340	89	-1.935	2.55359	0.0001254	0.001531
c70070_g1	Granulin repeat cysteine protease family	403	107	-1.914	2.80099	0.000127	0.001549
c79288_g1	B3 domain-containing Os01g0723500-like isoform X1	300	1083	1.849	4.23183	0.0001269	0.001549
c72694_g2	zinc finger homeobox 4-like///VQ motif-containing family	826	228	-1.859	3.84251	0.0001301	0.001586
c81250_g1	glucan endo-1,3-beta-glucosidase 12	36	152	2.072	1.3791	0.0001311	0.001597
c88879_g1	NADP-dependent malic enzyme-like isoform X2///NADP-dependent malic enzyme	1333	4701	1.816	6.35393	0.0001324	0.001612
c77459_g2	zinc finger BED domain-containing DAYSLEEPER-like///zinc finger BED domain-containing RICESLEEPER 2-like	768	212	-1.859	3.73789	0.0001338	0.001628
c84153_g3	PREDICTED: uncharacterized protein LOC104886664///PREDICTED: uncharacterized protein LOC104897668	62	243	1.966	2.06557	0.0001355	0.001648
c61624_g1	heavy metal-associated isoprenylated plant 26	8	51	2.651	-0.228487	0.0001368	0.001662
c94991_g1	PREDICTED: uncharacterized protein LOC100263584	51	8	-2.656	-0.22749	0.0001368	0.001662
c86082_g5	cytochrome P450 71A26-like	413	111	-1.897	2.83976	0.0001421	0.001725
c67040_g1	delta(7)-sterol-C5(6)-desaturase-like	47	7	-2.728	-0.3468	0.0001434	0.00174
c87447_g2	---NA---///splicing factor 3B subunit 3-like	73	280	1.935	2.27389	0.0001445	0.001752
c84108_g1	caffeic acid 3-O-methyltransferase	167	607	1.859	3.39772	0.0001453	0.001761
c90290_g1	zeatin O-glucosyltransferase-like	412	111	-1.893	2.83703	0.0001461	0.001769
c82561_g5	hypothetical protein SOVF_136040	45	182	2.011	1.64588	0.0001463	0.001771
c76204_g1	ankyrin repeat-containing At3g12360-like	58	10	-2.524	-0.034832	0.0001478	0.001787
c76205_g2	Metal tolerance 4 isoform 1///metal tolerance 4-like	58	10	-2.524	-0.034832	0.0001478	0.001787
c75426_g2	ethylene-responsive transcription factor ABR1	27	2	-3.676	-1.16047	0.0001488	0.001799
c71974_g2	glucan endo-1,3-beta-glucosidase 8	6	43	2.813	-0.477823	0.0001497	0.001807
c74411_g1	probable purple acid phosphatase 20	43	6	-2.818	-0.476873	0.0001497	0.001807
c71062_g1	transcription factor RAX2-like	48	192	1.995	1.72486	0.0001504	0.001815
c75258_g2	pentatricopeptide repeat-containing At1g64310	5	39	2.93	-0.620768	0.0001553	0.00187
c76722_g3	NRT1 PTR FAMILY -like///peptide transporter 1	39	5	-2.935	-0.619845	0.0001553	0.00187
c88516_g4	PREDICTED: uncharacterized protein LOC104889107	39	5	-2.935	-0.619845	0.0001553	0.00187
c72775_g1	disease resistance RGA3 isoform X1///disease resistance RGA3	54	9	-2.571	-0.138677	0.0001565	0.001881
c77349_g8	wall-associated receptor kinase 2-like///wall-associated receptor kinase-like 16	21	97	2.199	0.724909	0.0001565	0.001881
c89804_g1	cationic amino acid transporter 1-like	54	9	-2.571	-0.138677	0.0001565	0.001881
c91600_g1	cysteine-rich repeat secretory 3	21	97	2.199	0.724909	0.0001565	0.001881
c81536_g1	PROF1_ARTVU ame: Full=Profilin-1 ame: Full=Pollen allergen Art v ame: Allergen=Art v	23	104	2.168	0.827589	0.0001573	0.001888
c88783_g2	probable glycosyltransferase At5g03795	146	35	-2.059	1.3267	0.0001573	0.001888
c70563_g1	serine threonine- phosphatase 7 long form homolog	3	31	3.314	-0.95777	0.000158	0.001893
c82431_g5	zinc finger BED domain-containing RICESLEEPER 2-like	3	31	3.314	-0.95777	0.000158	0.001893
c86587_g1	exocyst complex component EXO84A	3	31	3.314	-0.95777	0.000158	0.001893
c69130_g1	glutathione S-transferase U17-like	35	4	-3.092	-0.778558	0.0001588	0.001902
c81920_g1	F-box At3g07870-like///F-box CPR30-like	260	68	-1.935	2.17039	0.0001612	0.001929
c84406_g3	Cyclin-D3-1	1870.87	536.16	-1.805	5.03082	0.000162	0.001937
c75051_g6	TMV resistance N-like	16	79	2.292	0.423547	0.0001623	0.00194
c92590_g2	isoflavone reductase	237	843	1.828	3.87624	0.0001628	0.001945
c79115_g1	auxin transporter 3	141	511	1.854	3.15165	0.0001644	0.001962
c78044_g1	---NA---	11	61	2.456	0.042144	0.0001646	0.001963
c85091_g1	wall-associated receptor kinase 3-like///wall-associated receptor kinase 4-like///wall-associated receptor kinase-like 16	11	61	2.456	0.042144	0.0001646	0.001963
c81667_g1	transmembrane 45B-like	114	26	-2.129	0.965228	0.0001654	0.001971
c88159_g3	LURP-one-related 6	22	100	2.176	0.77145	0.0001655	0.001971
c81561_g3	transposon Tf2-1 poly isoform X1///AC069473_8 gypsy Ty-3 retroelement poly 69905-74404///---NA---	50	197	1.973	1.76567	0.0001679	0.001999
c89269_g2	PREDICTED: uncharacterized protein LOC105116651///PREDICTED: uncharacterized protein LOC104901267	2118	611	-1.796	5.21165	0.000168	0.001999
c89125_g1	G-type lectin S-receptor-like serine threonine- kinase CES101 isoform X1///G-type lectin S-receptor-like serine threonine- kinase At1g67520	748	2596	1.793	5.50316	0.0001703	0.002026
c78288_g5	---NA---	15	75	2.31	0.348786	0.0001724	0.002049
c43469_g1	alpha-L-arabinofuranosidase 1-like	0	17	7.097	-1.81328	0.0001755	0.002052
c52501_g1	uncharacterized mitochondrial g00810-like	0	17	7.097	-1.81328	0.0001755	0.002052
c56187_g1	gibberellin-regulated 12-like	17	0	-7.099	-1.81262	0.0001755	0.002052
c62192_g1	F-box LRR-repeat At5g02700	0	17	7.097	-1.81328	0.0001755	0.002052
c63698_g1	partial	17	0	-7.099	-1.81262	0.0001755	0.002052
c64147_g4	cyclin-U1-1	0	17	7.097	-1.81328	0.0001755	0.002052
c70084_g2	hydrolyzing O-glycosyl	17	0	-7.099	-1.81262	0.0001755	0.002052
c70206_g2	PREDICTED: uncharacterized protein LOC105967929///retroelement pol poly///PREDICTED: uncharacterized protein LOC102661920	17	0	-7.099	-1.81262	0.0001755	0.002052
c70220_g3	hypothetical protein SOVF_197280	17	0	-7.099	-1.81262	0.0001755	0.002052
c71238_g1	---NA---	17	0	-7.099	-1.81262	0.0001755	0.002052
c72678_g8	probable leucine-rich repeat receptor kinase At5g63930	0	17	7.097	-1.81328	0.0001755	0.002052
c73508_g11	serine threonine- kinase SAPK3 isoform X1///serine threonine- kinase SAPK3-like	0	17	7.097	-1.81328	0.0001755	0.002052
c74599_g6	retrovirus-related Pol poly from transposon TNT 1-94///PREDICTED: uncharacterized protein LOC104905474	17	0	-7.099	-1.81262	0.0001755	0.002052
c75243_g8	myb P	0	17	7.097	-1.81328	0.0001755	0.002052
c77606_g8	PREDICTED: uncharacterized protein LOC104899302	17	0	-7.099	-1.81262	0.0001755	0.002052
c77782_g2	probable nucleoredoxin 1	17	0	-7.099	-1.81262	0.0001755	0.002052
c78114_g18	retroelement pol poly	0	17	7.097	-1.81328	0.0001755	0.002052
c79082_g9	uncharacterized mitochondrial g00810-like	17	0	-7.099	-1.81262	0.0001755	0.002052
c80166_g1	fasciclin-like arabinogalactan 21	25	110	2.13	0.913105	0.0001737	0.002052
c80645_g2	linoleate 13S-lipoxygenase 3- chloroplastic///linoleate 13S-lipoxygenase 3- chloroplastic-like	27	117	2.108	1.00361	0.0001729	0.002052
c84322_g7	copia isoform X1	0	17	7.097	-1.81328	0.0001755	0.002052
c86859_g5	F-box RNI superfamily	25	110	2.13	0.913105	0.0001737	0.002052
c87830_g2	PREDICTED: uncharacterized protein LOC104900444	0	17	7.097	-1.81328	0.0001755	0.002052
c87839_g1	PREDICTED: uncharacterized protein LOC104889111	17	0	-7.099	-1.81262	0.0001755	0.002052
c90127_g3	Fgenesh 35	0	17	7.097	-1.81328	0.0001755	0.002052
c90857_g9	PREDICTED: uncharacterized protein LOC104884430	0	17	7.097	-1.81328	0.0001755	0.002052
c94363_g7	retroelement pol poly	0	17	7.097	-1.81328	0.0001755	0.002052
c94889_g5	probable LRR receptor-like serine threonine- kinase At3g47570	0	17	7.097	-1.81328	0.0001755	0.002052
c97024_g1	AC025782_3 Ty1 copia-element poly	0	17	7.097	-1.81328	0.0001755	0.002052
c95095_g8	alternative transcript type 3	114.85	419.08	1.864	2.86538	0.0001757	0.002054
c73892_g6	auxin-induced 6B-like	203	52	-1.965	1.81214	0.0001763	0.002059
c90374_g1	MATE efflux family 5-like///PREDICTED: uncharacterized protein LOC104908911///---NA---///PREDICTED: uncharacterized protein LOC104885266	244	861	1.816	3.90913	0.0001764	0.00206
c87008_g2	FAR-RED ELONGATED HYPOCOTYL 3-like///FAR1-RELATED SEQUENCE 6///FAR1-RELATED SEQUENCE 6-like	137	494	1.847	3.10471	0.0001769	0.002064
c86176_g3	dnaJ homolog subfamily B member 4-like	646.21	2238	1.79	5.29004	0.0001778	0.002073
c74280_g1	MFS transporter	1	22	4.295	-1.45076	0.000179	0.002081
c79374_g2	G-type lectin S-receptor-like serine threonine- kinase RLK1	1	22	4.295	-1.45076	0.000179	0.002081
c82233_g2	map3k delta-1	1	22	4.295	-1.45076	0.000179	0.002081
c87512_g6	disease resistance At4g27190-like	22	1	-4.3	-1.45001	0.000179	0.002081
c94866_g5	disease resistance At4g27190-like	22	1	-4.3	-1.45001	0.000179	0.002081
c72228_g2	NRT1 PTR FAMILY -like	53	9	-2.544	-0.160379	0.000188	0.002184
c88697_g2	subtilisin-like protease	9	53	2.539	-0.16137	0.000188	0.002184
c83056_g3	serine threonine- phosphatase 6 regulatory ankyrin repeat subunit B-like///ankyrin repeat-containing At3g12360-like	171	43	-1.991	1.56351	0.0001884	0.002187
c84189_g2	AC069473_8 gypsy Ty-3 retroelement poly 69905-74404	95	348	1.869	2.59824	0.0001905	0.00221
c90346_g2	PREDICTED: uncharacterized protein LOC104897426	109	25	-2.121	0.903819	0.0001913	0.002218
c89936_g7	zinc transporter 1-like	61	232	1.923	2.00845	0.0001929	0.002236
c87665_g5	F-box CPR30-like	76	283	1.893	2.29794	0.0001932	0.002238
c74436_g4	cytochrome P450 71A3-like	275	959	1.799	4.06789	0.0001939	0.002245
c83805_g2	---NA---	67	13	-2.357	0.187569	0.0001968	0.002276
c86898_g1	SRG1-like///Codeine O-demethylase	143	35	-2.029	1.30311	0.0001968	0.002276
c84813_g1	chaperone dnaJ chloroplastic-like	1492	434	-1.784	4.70976	0.0001999	0.002311
c59480_g1	retroelement pol poly	8	49	2.594	-0.275016	0.0002019	0.002332
c67516_g2	peroxidase 12-like	2	26	3.618	-1.20567	0.0002053	0.002366
c70487_g10	uncharacterized mitochondrial g00810-like///retroelement pol poly	2	26	3.618	-1.20567	0.0002053	0.002366
c72074_g8	ribonuclease H At1g65750	2	26	3.618	-1.20567	0.0002053	0.002366
c74982_g1	SENESCENCE-RELATED GENE 1 family///SRG1-like///Senescence-related gene 1	26	2	-3.622	-1.20487	0.0002053	0.002366
c81349_g6	transcription factor bHLH18-like	26	2	-3.622	-1.20487	0.0002053	0.002366
c85133_g6	ribonuclease H At1g65750	4	34	3.046	-0.813388	0.0002065	0.002377
c91526_g2	cytochrome P450 86B1-like	20	91	2.176	0.639674	0.0002069	0.002381
c72840_g1	anthocyanidin synthase	16	77	2.256	0.394113	0.000211	0.002423
c75095_g3	isoflavone 2 -hydroxylase-like	30	3	-3.271	-0.995397	0.0002109	0.002423
c90775_g3	probable leucine-rich repeat receptor kinase At5g63930	30	3	-3.271	-0.995397	0.0002109	0.002423
c92245_g1	cytochrome P450 family///cytochrome P450 82A3-like	30	3	-3.271	-0.995397	0.0002109	0.002423
c86291_g1	F-box FBD LRR-repeat At5g56420-like	604	172	-1.814	3.40269	0.0002117	0.002428
c92266_g1	sugar transporter ERD6-like 5	402	112	-1.845	2.81216	0.0002116	0.002428
c71262_g1	trihelix transcription factor GT-2-like	78	287	1.875	2.3216	0.0002151	0.002465
c82057_g1	PREDICTED: uncharacterized protein LOC104900422	7	45	2.661	-0.398387	0.0002173	0.002489
c91047_g1	octanoyltransferase isoform X1///Lipoyltransferase 2 isoform 2	569	162	-1.814	3.31696	0.0002173	0.002489
c81791_g1	wall-associated receptor kinase 2-like	729	210	-1.797	3.67648	0.0002179	0.002494
c89002_g1	probable pectinesterase pectinesterase inhibitor 51	87	19	-2.19	0.576632	0.0002207	0.002525
c67901_g1	non-specific lipid-transfer At2g13820 precursor///non-specific lipid transfer GPI-anchored 2-like	17	80	2.224	0.452409	0.000224	0.002559
c71922_g3	sodium-coupled neutral amino acid transporter 4-like	17	80	2.224	0.452409	0.000224	0.002559
c71841_g1	heavy metal-associated isoprenylated plant 26-like	909	3067	1.752	5.75264	0.0002261	0.002582
c85673_g1	microsomal glutathione S-transferase 3///psbQ chloroplastic	32	131	2.027	1.17786	0.0002264	0.002584
c74867_g2	disease resistance At4g27190-like	252	68	-1.89	2.13518	0.0002277	0.002597
c73193_g6	PREDICTED: uncharacterized protein LOC104893474	59	11	-2.412	0.004687	0.0002291	0.00261
c93928_g1	probable glutathione S-transferase parC	100	359	1.84	2.64899	0.0002291	0.00261
c68156_g2	probable aquaporin NIP-type	38	151	1.985	1.38661	0.0002307	0.002628
c93777_g3	ankyrin repeat-containing At3g12360-like///ankyrin repeat-containing At3g12360-like isoform X1	338	1154	1.769	4.34099	0.0002323	0.002644
c91589_g3	F-box LRR-repeat At4g14103-like isoform X1	592	170	-1.802	3.37656	0.0002337	0.002659
c89745_g2	monoacylglycerol lipase ABHD6	910	266	-1.776	3.99993	0.0002373	0.002698
c92948_g2	PREDICTED: uncharacterized protein LOC103343557///hypothetical protein SOVF_173920///PREDICTED: uncharacterized protein LOC104884875	840	245	-1.779	3.88415	0.0002375	0.002699
c85225_g1	Alpha-L-fucosidase 2	71	261	1.874	2.18645	0.000238	0.002703
c73289_g3	glycylpeptide N-tetradecanoyltransferase 1	194	51	-1.927	1.75532	0.0002399	0.002723
c89573_g2	ammonium transporter 3 member 1-like///AMT32_ORYSJ ame: Full=Ammonium transporter 3 member 2 Short= 3 2	57	214	1.904	1.89742	0.0002406	0.00273
c76011_g1	F-box SKIP23-like///F-box At1g65770	120	29	-2.047	1.05268	0.0002437	0.002763
c90583_g1	F-box At3g08750-like	2089	623	-1.748	5.20263	0.0002446	0.002772
c84562_g6	Chalcone synthase	8	48	2.564	-0.298856	0.0002458	0.002784
c72471_g1	---NA---	103	24	-2.098	0.828706	0.0002469	0.002795
c69921_g1	transferring glycosyl///PREDICTED: uncharacterized protein LOC104903328	10	55	2.442	-0.097237	0.0002491	0.002817
c90631_g1	calmodulin-binding 60-C///PREDICTED: uncharacterized protein LOC104893586	10	55	2.442	-0.097237	0.0002491	0.002817
c87758_g3	BONZAI 3///BONZAI 3-like isoform X2///BONZAI 3-like	201	692	1.781	3.60307	0.000251	0.002837
c79493_g2	zinc finger BED domain-containing RICESLEEPER 1-like	1816	6042	1.732	6.73477	0.0002544	0.002874
c85522_g1	factor of DNA methylation 1-like	3014	906	-1.736	5.73348	0.0002556	0.002886
c85585_g3	probable LRR receptor-like serine threonine- kinase At3g47570	116	28	-2.048	1.00474	0.0002579	0.002911
c81383_g3	nuclease HARBI1	21	1	-4.233	-1.50447	0.0002593	0.002925
c91446_g1	serine threonine- kinase At3g51990	137	477	1.796	3.06558	0.0002617	0.00295
c95205_g1	receptor 12	99	351	1.822	2.62067	0.0002649	0.002984
c90062_g7	probable disease resistance At4g27220///disease resistance At4g27190-like isoform X2	109	26	-2.065	0.914226	0.0002651	0.002985
c94843_g1	TMV resistance N-like	2759	831	-1.733	5.60674	0.0002662	0.002996
c72148_g1	NRT1 PTR FAMILY	44	7	-2.633	-0.423444	0.0002683	0.003016
c87929_g1	hypothetical protein M569_06648	7	44	2.628	-0.424374	0.0002683	0.003016
c71158_g4	testis-expressed sequence 10 isoform X1	4	33	3.003	-0.848144	0.0002692	0.003025
c49189_g1	PREDICTED: uncharacterized protein LOC102661920///PREDICTED: uncharacterized protein LOC105967929	16	0	-7.012	-1.88302	0.0002729	0.00303
c54274_g3	uncharacterized mitochondrial g00810-like	16	0	-7.012	-1.88302	0.0002729	0.00303
c56847_g2	retroelement pol poly	16	0	-7.012	-1.88302	0.0002729	0.00303
c64176_g1	probable serine threonine- kinase At1g18390 isoform X3	16	0	-7.012	-1.88302	0.0002729	0.00303
c67336_g1	miraculin-like	16	0	-7.012	-1.88302	0.0002729	0.00303
c68884_g1	PREDICTED: uncharacterized protein LOC104896195	0	16	7.01	-1.88366	0.0002729	0.00303
c69706_g9	hypothetical protein SOVF_065510	0	16	7.01	-1.88366	0.0002729	0.00303
c71388_g8	mariner transposase	16	0	-7.012	-1.88302	0.0002729	0.00303
c71588_g2	E3 ubiquitin- ligase SINA-like 2	16	0	-7.012	-1.88302	0.0002729	0.00303
c74311_g1	LRR receptor-like serine threonine- kinase GSO1///Disease resistance family LRR family///receptor 12///probable LRR receptor-like serine threonine- kinase At4g36180 isoform X1///kinase receptor type precursor	51	9	-2.489	-0.204786	0.0002724	0.00303
c74446_g3	F-box At3g07870-like	16	0	-7.012	-1.88302	0.0002729	0.00303
c74744_g3	C-repeat dehydration-responsive element-binding factor 4	16	0	-7.012	-1.88302	0.0002729	0.00303
c74749_g4	PREDICTED: uncharacterized protein LOC105967929///PREDICTED: uncharacterized protein LOC102661920	0	16	7.01	-1.88366	0.0002729	0.00303
c75286_g10	inositol oxygenase 1-like	0	16	7.01	-1.88366	0.0002729	0.00303
c76234_g3	isoflavone 2 -hydroxylase-like	16	0	-7.012	-1.88302	0.0002729	0.00303
c76234_g7	isoflavone 2 -hydroxylase-like	16	0	-7.012	-1.88302	0.0002729	0.00303
c78442_g5	uncharacterized mitochondrial g00810-like	16	0	-7.012	-1.88302	0.0002729	0.00303
c79109_g3	E3 ubiquitin- ligase UPL5-like	16	0	-7.012	-1.88302	0.0002729	0.00303
c79540_g12	disease resistance RGA1	16	0	-7.012	-1.88302	0.0002729	0.00303
c80123_g4	Major facilitator superfamily isoform 4	9	51	2.484	-0.205751	0.0002724	0.00303
c82452_g5	disease resistance RGA1 isoform X1///disease resistance RGA3	0	16	7.01	-1.88366	0.0002729	0.00303
c87785_g3	PREDICTED: uncharacterized protein LOC104886359	0	16	7.01	-1.88366	0.0002729	0.00303
c94936_g1	F-box At5g03970-like	21	92	2.122	0.664556	0.0002712	0.00303
c72884_g2	F-box LRR-repeat At4g14103-like	27	112	2.045	0.954048	0.0002738	0.003038
c95252_g2	disease resistance (CC-NBS-LRR class) family	75	16	-2.222	0.365109	0.0002752	0.003051
c81122_g2	long-chain-alcohol oxidase FAO1	81	290	1.836	2.34488	0.0002804	0.003107
c81519_g1	codeine O-demethylase-like isoform X1	487	141	-1.79	3.09913	0.0002814	0.003117
c76416_g1	glycerol-3-phosphate acyltransferase 1	3	29	3.218	-1.03575	0.0002826	0.003124
c87420_g5	---NA---	29	3	-3.223	-1.03493	0.0002826	0.003124
c87866_g1	TPR repeat-containing thioredoxin TTL1-like	105	25	-2.067	0.86137	0.0002825	0.003124
c91629_g3	PREDICTED: uncharacterized protein LOC104897185	29	3	-3.223	-1.03493	0.0002826	0.003124
c91839_g1	hypothetical protein SOVF_206130	41	158	1.941	1.45949	0.0002838	0.003135
c87096_g2	oligopeptide transporter 4	2	25	3.561	-1.25146	0.0002846	0.003142
c91975_g4	Ulp1 protease carboxy-terminal domain///---NA---	150	516	1.779	3.18213	0.0002847	0.003142
c85099_g1	small ubiquitin-related modifier 2	607	178	-1.771	3.41923	0.0002889	0.003187
c74344_g2	betaine aldehyde dehydrogenase chloroplastic	17	78	2.187	0.423564	0.0002892	0.003188
c94590_g3	LRR receptor-like kinase	40	6	-2.714	-0.560961	0.0002938	0.003237
c73955_g3	probable LRR receptor-like serine threonine- kinase At1g06840///probable LRR receptor-like serine threonine- kinase At1g06840 isoform X2///probable LRR receptor-like serine threonine- kinase At1g06840 isoform X1	121	30	-2.01	1.07141	0.0002984	0.003286
c77419_g3	inactive RESTRICTED TEV MOVEMENT 1-like	8	47	2.534	-0.323096	0.0002997	0.003299
c74999_g8	3-oxoacyl-[acyl-carrier- ] synthase chloroplastic	111	27	-2.037	0.94503	0.0003005	0.003305
c90053_g7	pectinesterase pectinesterase inhibitor PPE8B-like	504	1669	1.725	4.88223	0.0003008	0.003307
c94538_g3	probable polygalacturonase	2477	757	-1.712	5.45625	0.0003156	0.003468
c87653_g1	---NA---	97	23	-2.073	0.749467	0.0003245	0.003562
c88168_g3	probable LRR receptor-like serine threonine- kinase At1g06840 isoform X2///probable LRR receptor-like serine threonine- kinase At1g06840 isoform X1	97	23	-2.073	0.749467	0.0003245	0.003562
c94040_g3	PREDICTED: uncharacterized protein LOC104889867	87	20	-2.116	0.589677	0.0003274	0.003592
c84553_g1	pectinesterase pectinesterase inhibitor 28	50	9	-2.46	-0.227513	0.0003286	0.003603
c69340_g1	14 kDa proline-rich///cortical cell-delineating precursor	54	198	1.87	1.79415	0.000331	0.003628
c88102_g1	U-box domain-containing 21-like	43	7	-2.6	-0.449924	0.0003318	0.003635
c90037_g1	probable mitochondrial chaperone BCS1-B isoform X1	59	214	1.854	1.90789	0.000335	0.003668
c88664_g2	F-box LRR-repeat 2	524	155	-1.759	3.21108	0.000339	0.003708
c92787_g6	zinc finger BED domain-containing RICESLEEPER 2-like	21	90	2.091	0.63969	0.000339	0.003708
c91326_g2	FAR1-RELATED SEQUENCE 5-like	60	12	-2.312	0.043153	0.0003414	0.003732
c79175_g5	ABC transporter B family member 2-like	181	49	-1.885	1.66567	0.0003458	0.003779
c72702_g3	NB-ARC domain-containing disease resistance///Disease resistance	4	32	2.959	-0.883759	0.0003521	0.003845
c77522_g1	unnamed protein product	10	53	2.389	-0.139659	0.0003549	0.003868
c80631_g1	synaptonemal complex 1-like///hypothetical protein BVRB_9g211530	53	10	-2.394	-0.1387	0.0003549	0.003868
c85890_g3	PREDICTED: uncharacterized protein LOC104908184///PREDICTED: uncharacterized protein LOC104894083	229	64	-1.84	2.00963	0.0003544	0.003868
c92718_g1	glutathione S-transferase U9-like	73	258	1.817	2.18216	0.0003546	0.003868
c65653_g1	hypothetical protein SOVF_029180	241	799	1.726	3.82202	0.000356	0.003878
c91934_g1	30S ribosomal chloroplastic	2875	890	-1.694	5.67532	0.0003593	0.003912
c89560_g3	probable carboxylesterase 6	1061	324	-1.713	4.23518	0.0003659	0.003981
c89905_g1	ZINC INDUCED FACILITATOR-LIKE 1-like isoform X1	8	46	2.503	-0.347751	0.0003661	0.003981
c81117_g4	phosphate-responsive 1 family	262	863	1.717	3.93495	0.000372	0.004044
c92157_g1	delta-1-pyrroline-5-carboxylate synthase isoform X2///Pyrroline-5-carboxylate synthetase isoform 3	8260	2581	-1.681	7.2001	0.000374	0.004063
c81895_g3	GATA transcription factor 8-like///GATA transcription factor 8	251	827	1.717	3.8736	0.000376	0.004083
c66366_g3	cytochrome P450 89A2-like	1	20	4.159	-1.56176	0.0003782	0.004096
c71087_g1	NAC domain-containing 90///NAC domain-containing 90-like	1	20	4.159	-1.56176	0.0003782	0.004096
c76758_g4	F-box CPR30-like	20	1	-4.163	-1.56106	0.0003782	0.004096
c84315_g1	shikimate O-hydroxycinnamoyltransferase-like	20	1	-4.163	-1.56106	0.0003782	0.004096
c85249_g5	auxin efflux carrier component 2-like	1	20	4.159	-1.56176	0.0003782	0.004096
c79487_g5	mannan endo-1,4-beta-mannosidase 6-like	3	28	3.168	-1.07638	0.00038	0.004111
c91580_g3	G3BP isoform X2	3	28	3.168	-1.07638	0.00038	0.004111
c86354_g3	sucrose synthase 2///sucrose synthase	763	232	-1.719	3.75968	0.0003828	0.00414
c80541_g2	1-aminocyclopropane-1-carboxylate oxidase homolog 4-like	473	141	-1.748	3.0668	0.000387	0.004183
c73475_g2	DNA-directed RNA polymerase II subunit 1-like///DNA-directed RNA polymerase II subunit RPB1	307	89	-1.787	2.43918	0.0003873	0.004184
c76854_g10	TPR and ankyrin repeat-containing 1///TPR and ankyrin repeat-containing 1-like	18	79	2.124	0.452426	0.0003881	0.004191
c93424_g2	Phosphoglucomutase glucose///PREDICTED: uncharacterized protein LOC104896793///hypothetical protein SOVF_210640	106	361	1.764	2.67372	0.0003906	0.004215
c79465_g3	Regulator of Vps4 activity in the MVB pathway///IST1 homolog	198	55	-1.848	1.80093	0.0003933	0.004242
c84191_g4	---NA---	378	1227	1.696	4.44606	0.0003966	0.004273
c92231_g6	retroelement pol poly	24	2	-3.507	-1.298	0.0003964	0.004273
c87539_g2	wall-associated receptor kinase-like 10///wall-associated receptor kinase-like 1	59	12	-2.288	0.024038	0.000401	0.004316
c88649_g2	---NA---	82	19	-2.105	0.509496	0.000401	0.004316
c80370_g2	proline dehydrogenase mitochondrial-like	96	328	1.769	2.53561	0.0004048	0.004355
c86954_g3	Chloroplast beta-amylase isoform 1	277	80	-1.793	2.29117	0.0004064	0.004369
c90454_g6	Transcription factor	159	43	-1.886	1.48179	0.0004085	0.00439
c86279_g3	PCTP isoform X1	38	143	1.906	1.32556	0.0004089	0.004392
c87164_g3	cellulose synthase E1	967	3092	1.674	5.78244	0.0004103	0.004404
c77874_g2	remorin 1///Remorin///remorin-like isoform X2///remorin isoform X2///remorin	42	7	-2.566	-0.476899	0.0004111	0.004407
c87770_g8	cytochrome P450 family 71///cytochrome P450 71A25-like///cytochrome P450 71A26-like	42	7	-2.566	-0.476899	0.0004111	0.004407
c90954_g4	cyclic nucleotide-gated ion channel 15	7	42	2.561	-0.477798	0.0004111	0.004407
c87469_g1	Zinc finger family	49	178	1.856	1.64591	0.0004123	0.004417
c90731_g2	probable phosphatase 2C 49///short-chain dehydrogenase reductase 3b-like	1663	5300	1.67	6.56043	0.0004125	0.004417
c90601_g2	valencene synthase	5	35	2.775	-0.746264	0.0004129	0.00442
c85791_g2	---NA---	577	1854	1.681	5.04382	0.0004133	0.004421
c81529_g3	EXORDIUM-like	62	13	-2.245	0.099004	0.0004211	0.004503
c91281_g2	aspartic ase nepenthesin-1-like	667	2138	1.678	5.24996	0.0004227	0.004517
c44909_g1	PREDICTED: uncharacterized protein LOC104884000	15	0	-6.92	-1.95704	0.0004289	0.004526
c62593_g3	PREDICTED: uncharacterized protein LOC104891168	15	0	-6.92	-1.95704	0.0004289	0.004526
c62701_g1	PREDICTED: uncharacterized protein LOC104896742	0	15	6.918	-1.95765	0.0004289	0.004526
c65195_g1	PREDICTED: uncharacterized protein LOC104884430///PREDICTED: uncharacterized protein LOC104884000	15	0	-6.92	-1.95704	0.0004289	0.004526
c65284_g2	glutamine amidotransferase YLR126C	0	15	6.918	-1.95765	0.0004289	0.004526
c67022_g1	zinc finger MYM-type 1-like	0	15	6.918	-1.95765	0.0004289	0.004526
c70422_g13	GATA zinc finger domain-containing 14-like///retroelement pol poly	0	15	6.918	-1.95765	0.0004289	0.004526
c70487_g18	retroelement pol poly	15	0	-6.92	-1.95704	0.0004289	0.004526
c70746_g4	receptor kinase At3g47110	0	15	6.918	-1.95765	0.0004289	0.004526
c72135_g2	vinorine synthase-like	52	10	-2.366	-0.160401	0.0004245	0.004526
c72332_g1	probable L-type lectin-domain containing receptor kinase	15	0	-6.92	-1.95704	0.0004289	0.004526
c72703_g4	type I inositol 1,4,5-trisphosphate 5-phosphatase 12 isoform X2	0	15	6.918	-1.95765	0.0004289	0.004526
c73484_g3	serpin-ZX-like	15	0	-6.92	-1.95704	0.0004289	0.004526
c74446_g4	retrotransposon poly	15	0	-6.92	-1.95704	0.0004289	0.004526
c75773_g3	agamous-like MADS-box AGL80	15	0	-6.92	-1.95704	0.0004289	0.004526
c76094_g2	organic cation carnitine transporter 1	15	0	-6.92	-1.95704	0.0004289	0.004526
c76381_g6	non-LTR retroelement reverse transcriptase-like	15	0	-6.92	-1.95704	0.0004289	0.004526
c77073_g11	hypothetical protein SOVF_178770	0	15	6.918	-1.95765	0.0004289	0.004526
c77618_g1	HGWP repeat containing -like///1718313A tnp1	10	52	2.362	-0.161348	0.0004245	0.004526
c80466_g8	PREDICTED: uncharacterized protein LOC104904177///ribonuclease H At1g65750-like	15	0	-6.92	-1.95704	0.0004289	0.004526
c80964_g3	PREDICTED: uncharacterized protein LOC104893320	15	0	-6.92	-1.95704	0.0004289	0.004526
c81186_g1	respiratory burst oxidase homolog E	15	0	-6.92	-1.95704	0.0004289	0.004526
c82710_g10	---NA---	15	0	-6.92	-1.95704	0.0004289	0.004526
c90482_g2	uncharacterized mitochondrial g00810-like	15	0	-6.92	-1.95704	0.0004289	0.004526
c92881_g1	PREDICTED: uncharacterized protein LOC104899180///PREDICTED: uncharacterized protein LOC104884430	15	0	-6.92	-1.95704	0.0004289	0.004526
c93683_g2	vegetative cell wall gp1 isoform X1	54	193	1.833	1.76571	0.0004336	0.004573
c93412_g1	F-box kelch-repeat At1g67480	1917	602	-1.673	5.09627	0.0004352	0.004587
c68651_g1	photosynthetic NDH subunit of subcomplex B chloroplastic isoform X1	50	180	1.843	1.66453	0.0004416	0.004653
c75605_g1	disease resistance RGA2-like	284	83	-1.776	2.33059	0.0004468	0.004705
c90130_g1	F-box At4g22280-like///FBD-associated F-box	45	8	-2.476	-0.371923	0.0004478	0.004711
c91631_g3	FAR1-RELATED SEQUENCE 5-like	45	8	-2.476	-0.371923	0.0004478	0.004711
c82641_g3	B-box zinc finger 20 isoform X2	132	35	-1.914	1.21313	0.0004554	0.004789
c79137_g1	probable LRR receptor-like serine threonine- kinase At3g47570///probable LRR receptor-like serine threonine- kinase At3g47570-like	68	15	-2.174	0.238173	0.0004563	0.004796
c89645_g1	aspartic ase A1-like	509	1622	1.669	4.85414	0.0004586	0.004817
c89292_g3	probable xyloglucan endotransglucosylase hydrolase 23	173	48	-1.849	1.60908	0.0004595	0.004825
c72506_g3	cytochrome P450 CYP72A219-like	4	31	2.913	-0.920275	0.0004619	0.004843
[truncated: 1,006 more rows]

## Sheet: DEGsMU_Vs._FU
GENE	DESCRIPTION	LR	PValue	FDR
c50328_g1	ABC transporter F family member 1	4.87834	395.311	5.77699e-88	1.00052e-83
c67603_g1	ABC transporter F family member 1	4.98047	353.019	9.32847e-79	8.07799e-75
c95095_g12	phytochrome A	4.13334	274.231	1.35739e-61	7.83621e-58
c75880_g12	subtilase family	3.8123	233.869	8.54447e-53	3.69954e-49
c86406_g2	FAR1-RELATED SEQUENCE 5-like	4.20034	223.626	1.46389e-50	5.07063e-47
c87979_g1	hypothetical protein BVRB_5g113070///hypothetical protein BVRB_8g188680///PREDICTED: uncharacterized protein LOC104901480///hypothetical protein BVRB_1g012810	3.52526	215.348	9.357e-49	2.7009e-45
c89627_g2	zinc finger BED domain-containing RICESLEEPER 2-like	3.21866	194.848	2.78089e-44	6.88031e-41
c68293_g6	splicing proline- and glutamine-rich-like	3.1055	174.027	9.76695e-40	2.11442e-36
c67700_g1	RNA-dependent RNA polymerase	3.72964	158.715	2.15943e-36	4.15546e-33
c77380_g1	PREDICTED: uncharacterized protein LOC104899180	3.40647	148.73	3.28475e-34	5.68886e-31
c90864_g6	non-LTR retroelement reverse transcriptase	2.39024	136.822	1.31927e-31	2.07713e-28
c82116_g3	phospholipase D alpha 1-like	3.77102	135.617	2.42041e-31	3.49326e-28
c27199_g1	non-LTR retroelement reverse transcriptase-like	3.08009	130.312	3.50249e-30	4.66613e-27
c84588_g6	LINE-type retrotransposon LIb DNA	2.58229	129.882	4.34909e-30	5.38014e-27
c90855_g2	non-LTR retroelement reverse transcriptase	3.59157	125.82	3.36725e-29	3.88783e-26
c80571_g3	mitochondrial outer membrane porin of 36 kDa	2.37975	123.104	1.32361e-28	1.43272e-25
c95238_g2	70 kDa peptidyl-prolyl isomerase-like	2.42306	122.542	1.75654e-28	1.7895e-25
c78869_g4	AC069473_8 gypsy Ty-3 retroelement poly 69905-74404	2.20226	116.251	4.18842e-27	4.02996e-24
c86717_g6	AF525305_2 AP endonuclease reverse transcriptase///PREDICTED: uncharacterized protein LOC104905156	2.11547	114.081	1.25102e-26	1.14033e-23
c89291_g4	thiosulfate sulfurtransferase 18-like isoform X2///thiosulfate sulfurtransferase 18-like isoform X1	4.2278	111.93	3.70152e-26	3.20533e-23
c91238_g1	F-box LRR-repeat 23	2.50476	111.831	3.89076e-26	3.20876e-23
c89801_g3	Strong similarity to Zea mays retrotransposon Hopscotch poly (gb///retroelement pol poly -like	1.97439	109.89	1.03599e-25	8.15563e-23
c92202_g2	---NA---	1.86463	106.606	5.43093e-25	4.08949e-22
c25822_g1	Fgenesh 35	2.08277	106.173	6.75681e-25	4.87588e-22
c71253_g1	AF525305_2 AP endonuclease reverse transcriptase	1.44546	101.283	7.97274e-24	5.5232e-21
c85519_g1	G-type lectin S-receptor-like serine threonine- kinase At1g11300///G-type lectin S-receptor-like serine threonine- kinase SD1-13///G-type lectin S-receptor-like serine threonine- kinase At1g11330	3.99157	98.9346	2.6098e-23	1.73843e-20
c87039_g3	peptidyl-prolyl cis-trans isomerase FKBP62-like isoform X2	1.5479	98.315	3.56856e-23	2.28903e-20
c88638_g4	hypothetical protein SOVF_195130///hypothetical protein BVRB_7g164140///hypothetical protein SOVF_027900	1.97473	96.4268	9.26041e-23	5.72789e-20
c79430_g7	MADS-box 3///MADS-box transcription factor 6	4.3362	94.6627	2.25748e-22	1.34819e-19
c86559_g4	fructose-bisphosphate aldolase chloroplastic	5.31442	93.5614	3.93795e-22	2.27338e-19
c68830_g2	PREDICTED: uncharacterized protein LOC104891244	2.21805	92.8667	5.59382e-22	3.12388e-19
c79862_g6	mariner transposase	2.0897	92.8047	5.77193e-22	3.12388e-19
c77197_g5	PREDICTED: uncharacterized protein LOC104903161	1.60018	91.021	1.42159e-21	7.46074e-19
c94826_g1	Retrotransposon gag///hypothetical protein BVRB_4g095420	1.66607	89.5751	2.95219e-21	1.5038e-18
c84292_g6	shock SRC2	2.68843	88.8654	4.22617e-21	2.09123e-18
c87040_g2	11-beta-hydroxysteroid dehydrogenase 1B-like	1.21663	88.5087	5.06108e-21	2.4348e-18
c80419_g4	---NA---	1.14313	87.2041	9.7881e-21	4.58162e-18
c71126_g17	PREDICTED: uncharacterized protein LOC104884430	0.906568	85.286	2.5819e-20	1.17674e-17
c78346_g2	PREDICTED: uncharacterized protein LOC104803157	1.78232	84.8993	3.13952e-20	1.39419e-17
c81309_g5	zinc-finger homeodomain 9-like	2.06083	83.9314	5.12232e-20	2.21784e-17
c82019_g2	ATP-dependent DNA helicase PIF1-like///ATP-dependent DNA helicase pif1-like	3.80206	82.9178	8.55364e-20	3.61318e-17
c92608_g1	---NA---	0.993099	82.4116	1.10503e-19	4.55668e-17
c57855_g1	hypothetical protein BVRB_7g177280	1.12946	81.8364	1.47833e-19	5.95424e-17
c74180_g1	---NA---	4.51944	80.063	3.62659e-19	1.42748e-16
c76199_g3	Alpha-L-fucosidase 2	1.24421	78.9342	6.42137e-19	2.47137e-16
c92682_g6	PREDICTED: uncharacterized protein LOC104890289	1.27748	78.6835	7.29023e-19	2.74477e-16
c88932_g3	---NA---	0.781207	78.3612	8.58206e-19	3.1624e-16
c78605_g2	DNA RNA polymerases superfamily///GTP-binding SAR1B-like	2.79621	77.0073	1.70331e-18	6.14574e-16
c71370_g5	zinc finger BED domain-containing RICESLEEPER 2-like	0.538461	74.4301	6.28245e-18	2.22053e-15
c94224_g2	Inner membrane oxaA	4.67865	73.0191	1.28403e-17	4.44761e-15
c73112_g2	F-box kelch-repeat At4g12810	2.44686	72.8245	1.41708e-17	4.81225e-15
c92543_g1	AC092548_5 TNP2-like transposon///transposon En Spm sub-class	2.32429	71.2006	3.22693e-17	1.07475e-14
c78497_g4	PREDICTED: uncharacterized protein LOC104898097///hypothetical protein	0.930751	70.2801	5.14532e-17	1.66667e-14
c87005_g1	C globular///Serine threonine phosphatase 7 long	3.78254	70.2606	5.19662e-17	1.66667e-14
c87452_g3	---NA---	1.14025	69.0805	9.45259e-17	2.97654e-14
c78446_g3	pentatricopeptide repeat-containing At3g29290	1.26172	68.9902	9.89539e-17	3.06033e-14
c81911_g1	retroelement pol poly	0.435791	67.38	2.2391e-16	6.80332e-14
c75638_g6	endonuclease exonuclease phosphatase family	0.441699	66.7492	3.08348e-16	9.20738e-14
c85717_g1	FAR1-RELATED SEQUENCE 5-like	1.94047	65.6871	5.28496e-16	1.55136e-13
c80330_g6	---NA---///splicing proline- and glutamine-rich-like	1.04853	65.6276	5.44717e-16	1.57232e-13
c72494_g1	FKBP-type peptidyl-prolyl cis-trans isomerase	-0.408848	65.5582	5.64228e-16	1.60195e-13
c71260_g4	nuclease HARBI1///L10-interacting MYB domain-containing -like	0.724471	65.3763	6.18792e-16	1.72853e-13
c84010_g3	hypothetical protein glysoja_044118	-0.086739	64.9006	7.8775e-16	2.15375e-13
c85148_g1	B3 domain-containing Os01g0723500-like	3.02582	64.8803	7.95888e-16	2.15375e-13
c78763_g3	fatty acyl- reductase 2-like	3.26501	64.5604	9.36179e-16	2.49441e-13
c77667_g2	proliferation-associated 2G4-like	-0.100191	64.4651	9.82595e-16	2.57842e-13
c88207_g2	PREDICTED: uncharacterized protein LOC104893500///PREDICTED: uncharacterized protein LOC104897198///flocculation FLO11-like	1.54542	64.1176	1.17208e-15	3.02975e-13
c78851_g1	copia isoform X1	2.21915	63.9895	1.25082e-15	3.18573e-13
c81911_g8	retroelement pol poly -like	0.411867	61.8674	3.67382e-15	9.22129e-13
c91372_g3	sugar transport 8///sugar transport 8-like isoform X1	-0.63486	61.4152	4.62221e-15	1.1436e-12
c92092_g6	Retrovirus-related Pol poly from transposon TNT 1-94///PREDICTED: uncharacterized protein LOC104905511///retroelement pol poly	1.27979	61.3283	4.83088e-15	1.1784e-12
c71351_g6	hypothetical protein SOVF_172930///ribonuclease H At1g65750	0.128196	61.2948	4.9137e-15	1.18195e-12
c86717_g3	PREDICTED: uncharacterized protein LOC104887201	0.519165	60.2068	8.53987e-15	2.02606e-12
c77727_g6	poly///Retrovirus-related Pol poly from transposon TNT 1-94	0.98699	60.1022	9.00586e-15	2.10774e-12
c83998_g1	PREDICTED: uncharacterized protein LOC104886889	0.76281	60.0625	9.18935e-15	2.12201e-12
c70860_g8	argonaute 2-like	-0.163208	59.3415	1.3255e-14	3.02056e-12
c92521_g6	PREDICTED: uncharacterized protein LOC104901854///---NA---	-0.34837	59.1997	1.42454e-14	3.2041e-12
c87834_g4	ribosomal S10 (mitochondrion)	0.58719	58.6361	1.89708e-14	4.21224e-12
c95056_g2	disease resistance RGA1	0.866911	58.29	2.26189e-14	4.95869e-12
c73534_g1	replication A 70 kDa DNA-binding subunit B-like///replication A 70 kDa DNA-binding subunit D-like	-0.017882	58.0501	2.55531e-14	5.53192e-12
c87791_g1	ribonuclease H At1g65750	0.224751	57.8826	2.78244e-14	5.94926e-12
c84266_g3	PREDICTED: uncharacterized protein LOC104883482///PREDICTED: uncharacterized protein LOC104907437///pollen-specific leucine-rich repeat extensin 1	3.00565	57.7037	3.04735e-14	6.43623e-12
c73880_g5	PREDICTED: uncharacterized protein LOC104885134///retroelement pol poly -like///LTR retrotransposon like	0.230562	56.9083	4.56621e-14	9.52798e-12
c81609_g5	---NA---	1.67111	56.0213	7.16896e-14	1.47809e-11
c76097_g7	ribonuclease H At1g65750	-0.225358	55.5055	9.31968e-14	1.89891e-11
c77156_g5	PREDICTED: uncharacterized protein LOC104903416	-0.307988	55.2667	1.05234e-13	2.11925e-11
c82239_g9	receptor kinase At4g00960	2.78613	55.1081	1.14078e-13	2.27095e-11
c69835_g2	transcription factor RAX3-like	4.51177	54.9379	1.244e-13	2.44828e-11
c72689_g3	Transcription factor HBP-1b(c1)///transcription factor HBP-1b(c38)	3.74498	54.3749	1.65668e-13	3.22382e-11
c87658_g1	GDSL esterase lipase At4g10955-like	1.16709	54.2807	1.73803e-13	3.34454e-11
c72403_g5	AF525305_2 AP endonuclease reverse transcriptase///PREDICTED: uncharacterized protein LOC104899180	-0.0241761	54.1894	1.82062e-13	3.46498e-11
c86672_g2	PREDICTED: uncharacterized protein LOC104892995	0.0149228	53.2051	3.0048e-13	5.65654e-11
c86378_g2	G-type lectin S-receptor-like Serine Threonine-kinase///G-type lectin S-receptor-like serine threonine- kinase At1g11330///S-locus lectin kinase family partial	1.98927	53.1	3.16986e-13	5.9031e-11
c89056_g1	phospholipase D epsilon	2.95367	53.0394	3.26932e-13	6.02355e-11
c80652_g4	---NA---	2.71772	52.6598	3.96631e-13	7.23079e-11
c76057_g8	TRANSPARENT TESTA 12-like	1.66978	52.0993	5.27628e-13	9.45836e-11
c94766_g1	E3 ubiquitin- ligase UPL5	7.09684	52.0915	5.29742e-13	9.45836e-11
c81155_g2	hypothetical protein BVRB_7g177090 isoform C///sieve element occlusion a///sieve element occlusion 1	5.29398	51.7719	6.23376e-13	1.10166e-10
c94691_g2	BRCT domain-containing At4g02110	6.43711	51.5452	6.99683e-13	1.22402e-10
c92786_g3	ribonuclease H At1g65750	-0.201698	51.0208	9.13908e-13	1.5828e-10
c62607_g1	ALB2_PEA ame: Full=Albumin-2 ame: Full=PA2	0.72235	50.746	1.05129e-12	1.8027e-10
c86910_g5	INVOLVED IN DE NOVO 2	-0.157679	50.7189	1.06586e-12	1.80976e-10
c90799_g3	pyroglutamyl-peptidase 1	3.33803	50.1007	1.46057e-12	2.45589e-10
c84501_g2	---NA---	-0.789374	49.815	1.68944e-12	2.81341e-10
c94543_g1	nicotinamide mononucleotide adenylyltransferase isoform X1	3.86067	49.7172	1.77584e-12	2.92912e-10
c78913_g2	unnamed protein product///PREDICTED: uncharacterized protein LOC101755892	5.46762	49.6759	1.81362e-12	2.96322e-10
c83327_g2	Fgenesh 35	0.825152	48.4379	3.40909e-12	5.51795e-10
c77007_g3	Sodium calcium exchanger family calcium-binding EF hand family isoform 1///sodium calcium exchanger///sodium calcium exchanger family	4.32305	48.3553	3.55577e-12	5.70208e-10
c79620_g5	AC069473_8 gypsy Ty-3 retroelement poly 69905-74404	0.180579	48.003	4.25567e-12	6.76183e-10
c77220_g4	Uncharacterized protein TCM_032491///Sorting nexin-13	1.79992	47.7687	4.79594e-12	7.55099e-10
c88130_g1	AC069473_8 gypsy Ty-3 retroelement poly 69905-74404///ras GTPase-activating -binding 1-like	1.80555	46.9439	7.30496e-12	1.13977e-09
c77047_g1	PREDICTED: uncharacterized protein LOC104891244	1.75107	46.1066	1.11989e-11	1.7164e-09
c87083_g2	transcription factor bHLH91-like	4.50089	46.1168	1.1141e-11	1.7164e-09
c93385_g2	F-box FBD LRR-repeat At1g13570-like///F-box LRR-repeat 25-like	4.77568	45.9081	1.23933e-11	1.8828e-09
c79133_g1	PREDICTED: uncharacterized protein LOC104886446///PREDICTED: uncharacterized protein LOC104893317	1.27486	45.7913	1.31549e-11	1.98113e-09
c76878_g7	retroelement pol poly///PREDICTED: uncharacterized protein LOC104906328	3.02071	45.664	1.40377e-11	2.09585e-09
c84845_g2	PREDICTED: uncharacterized protein LOC104906040 isoform X1///---NA---	2.1489	45.6346	1.42505e-11	2.10943e-09
c91194_g1	gibberellin induced	6.5252	44.5748	2.44827e-11	3.59336e-09
c92885_g2	RNA-directed DNA polymerase	0.654827	44.4557	2.60173e-11	3.7865e-09
c72171_g2	NAC transcription factor 29-like	3.28314	44.3599	2.73221e-11	3.94327e-09
c91872_g1	kDa class I heat shock -like	7.52623	44.2614	2.87324e-11	4.11253e-09
c79153_g5	PREDICTED: uncharacterized protein LOC105852116	-0.0686555	44.2346	2.91282e-11	4.13501e-09
c91113_g7	PHD finger transcription	3.78963	44.2115	2.94741e-11	4.1501e-09
c92326_g2	DNA binding	7.14107	44.0859	3.14275e-11	4.38946e-09
c80166_g1	fasciclin-like arabinogalactan 21	7.75939	44.0461	3.20736e-11	4.44386e-09
c78586_g2	PREDICTED: uncharacterized protein LOC104888642	1.14544	43.6455	3.93579e-11	5.40984e-09
c84603_g3	ras-related RABA2a	5.81082	43.5359	4.16249e-11	5.67639e-09
c86870_g3	guanosine nucleotide diphosphate dissociation inhibitor At5g09550	0.952334	43.3787	4.51079e-11	6.10331e-09
c95302_g2	T00833 RNA-directed DNA polymerase homolog - Arabidopsis thaliana (fragment)	2.25278	43.2635	4.7843e-11	6.4232e-09
c88918_g1	tetraketide alpha-pyrone reductase 2	0.667339	42.8936	5.77997e-11	7.70025e-09
c81430_g2	theobromine synthase	-0.350135	42.1996	8.2418e-11	1.08962e-08
c91807_g1	SNF2 domain-containing CLASSY 4-like	5.9729	41.9646	9.29393e-11	1.21941e-08
c84757_g2	probable glycosyltransferase At5g11130	2.07534	41.6231	1.10677e-10	1.44122e-08
c88260_g2	histone H2A-like	8.64233	41.4687	1.19773e-10	1.54802e-08
c72055_g2	aspartate mitochondrial	5.68757	41.4493	1.20971e-10	1.55192e-08
c87721_g1	auxin-binding ABP19a	6.87309	41.3716	1.2587e-10	1.6029e-08
c77125_g2	polygalacturonase At1g48100///polygalacturonase At1g48100-like///PREDICTED: uncharacterized protein LOC104884318	6.46712	41.1557	1.40574e-10	1.77708e-08
c45089_g1	---NA---	0.173289	40.8864	1.61343e-10	2.02485e-08
c74772_g1	PI-PLC X domain-containing At5g67130-like isoform X1///PI-PLC X domain-containing At5g67130	6.33398	40.6075	1.86094e-10	2.31868e-08
c76043_g1	ubiquinol oxidase mitochondrial-like///ubiquinol oxidase mitochondrial	4.57708	39.7457	2.89271e-10	3.57849e-08
c80645_g1	linoleate 13S-lipoxygenase 3- chloroplastic	1.63161	39.6678	3.01056e-10	3.69786e-08
c74436_g4	cytochrome P450 71A3-like	2.8063	39.6056	3.10796e-10	3.79062e-08
c72910_g4	expansin-A4-like precursor	5.13157	39.3702	3.5061e-10	4.24631e-08
c69091_g3	bifunctional riboflavin kinase FMN phosphatase-like	3.88716	39.1038	4.01857e-10	4.83317e-08
c94121_g6	zinc finger BED domain-containing RICESLEEPER 2-like///zinc finger BED domain-containing RICESLEEPER 1-like	4.25101	38.81	4.67133e-10	5.5795e-08
c88078_g1	histone-lysine N-methyltransferase SUVR4	4.90643	38.1829	6.44136e-10	7.64096e-08
c67901_g1	non-specific lipid-transfer At2g13820 precursor///non-specific lipid transfer GPI-anchored 2-like	1.56555	38.0159	7.017e-10	8.26717e-08
c91837_g1	PREDICTED: uncharacterized protein LOC104895248///hypothetical protein SOVF_090240///---NA---	3.77645	37.7031	8.23731e-10	9.63932e-08
c82797_g1	methylesterase 17-like///methyl esterase 17	2.01927	37.4419	9.41787e-10	1.09468e-07
c80670_g2	probable LRR receptor-like serine threonine- kinase At4g36180///histone-lysine N-methyltransferase ASHR3	7.24869	37.4287	9.4817e-10	1.09476e-07
c71978_g1	VQ motif-containing 25-like	3.3067	37.3831	9.70591e-10	1.11322e-07
c80434_g2	upstream activation factor subunit UAF30	5.07037	37.077	1.13553e-09	1.29383e-07
c70401_g1	bidirectional sugar transporter SWEET14	0.323374	36.9523	1.21054e-09	1.37028e-07
c77142_g1	NHL repeat-containing family///NHL domain-containing isoform 3///NHL domain-containing isoform 2///NHL domain-containing isoform 1	5.609	36.9156	1.23355e-09	1.38726e-07
c79027_g8	beta-D-xylosidase 6///probable beta-D-xylosidase 6	4.78346	36.7834	1.32011e-09	1.47503e-07
c84389_g5	probable adenylate kinase mitochondrial	6.52895	36.7295	1.35708e-09	1.50662e-07
c88802_g1	O-fucosyltransferase family isoform 1	4.42947	36.2118	1.76995e-09	1.95247e-07
c72910_g5	expansin-A1 isoform X2	4.70123	36.1571	1.82031e-09	1.99531e-07
c72677_g2	lipid transfer	5.21572	36.024	1.94903e-09	2.12297e-07
c80365_g6	ankyrin repeat-containing At5g02620-like///Ankyrin repeat family isoform 1///ankyrin repeat-containing At5g02620	4.04853	35.959	2.01509e-09	2.1812e-07
c78118_g2	40S ribosomal S11///40S ribosomal S11-like	8.61353	35.9398	2.03505e-09	2.18914e-07
c71920_g2	cold shock 1	2.35953	35.7167	2.28196e-09	2.43959e-07
c70145_g1	subtilisin-like protease	-0.525012	34.942	3.39674e-09	3.60909e-07
c73708_g1	plant T31B5-30	3.19708	34.9173	3.44015e-09	3.63292e-07
c75172_g2	chaperone 1	0.29523	34.8981	3.47415e-09	3.64659e-07
c80978_g1	replication A 70 kDa DNA-binding subunit A-like///replication A 70 kDa DNA-binding subunit B-like///replication factor-A carboxy-terminal domain	0.803214	34.1645	5.06441e-09	5.28377e-07
c80745_g3	acyl- synthetase 5///4-coumarate-- ligase-like 1	6.20016	34.1525	5.09582e-09	5.2847e-07
c75454_g1	hypothetical protein SOVF_088850	7.34419	34.0261	5.43768e-09	5.60567e-07
c77111_g1	B3 domain-containing At5g66980///Y3160_ORYSJ ame: Full= B3 domain-containing Os03g0621600///B3 domain-containing At5g66980 isoform X1	4.67311	33.8043	6.09435e-09	6.24544e-07
c92475_g5	peptidyl-prolyl cis-trans isomerase FKBP16- chloroplastic///peptidyl-prolyl cis-trans isomerase FKBP16- chloroplastic-like isoform X1	5.03442	33.7582	6.24042e-09	6.35752e-07
c81313_g5	mannan endo-1,4-beta-mannosidase 2-like	7.278	33.7304	6.33026e-09	6.41134e-07
c87818_g3	peroxidase 9	6.97606	33.633	6.65545e-09	6.7015e-07
c64806_g1	sugar transport 6-like///sugar transport 2	-0.251104	33.5736	6.86164e-09	6.86917e-07
c69290_g1	probable indole-3-acetic acid-amido synthetase	6.10745	33.2974	7.90876e-09	7.82696e-07
c85708_g1	phosphoenolpyruvate carboxylase///phosphoenolpyruvate carboxylase 2///phosphoenolpyruvate partial	7.79874	33.3059	7.87424e-09	7.82696e-07
c76952_g3	SAFB-like transcription modulator	0.767954	33.1278	8.62976e-09	8.49198e-07
c89292_g5	probable L-type lectin-domain containing receptor kinase	4.46278	32.7208	1.06393e-08	1.04102e-06
c73748_g1	mitochondrial chaperone BCS1-B	4.12213	32.5868	1.13986e-08	1.10906e-06
c81009_g1	elongation factor 1-gamma-like	5.85802	32.4889	1.19874e-08	1.15983e-06
c85149_g11	L-type lectin-domain containing receptor kinase -like	1.29031	32.4089	1.24911e-08	1.20186e-06
c88687_g1	adoMet-dependent rRNA methyltransferase spb1	8.05063	32.2104	1.38348e-08	1.31936e-06
c88776_g2	thioredoxin reductase NTRB-like	7.29978	32.2062	1.38647e-08	1.31936e-06
c70918_g2	4-diphosphocytidyl-2-C-methyl-D-erythritol chloroplastic	6.14976	32.1855	1.40135e-08	1.32623e-06
c71062_g1	transcription factor RAX2-like	3.7589	32.1518	1.42583e-08	1.34206e-06
c77653_g1	hypothetical protein SOVF_125400	3.95205	32.0871	1.47412e-08	1.38002e-06
c76485_g1	Inter-alpha-trypsin inhibitor heavy chain H3	10.3385	31.9652	1.56958e-08	1.46148e-06
c91548_g6	AC079604_5 copia-type	2.51513	31.7636	1.74123e-08	1.61264e-06
c69118_g1	DUF538 family	6.00807	31.6824	1.81559e-08	1.67256e-06
c89983_g2	gamma-glutamylcyclotransferase At3g02910	2.03647	31.6617	1.8351e-08	1.6816e-06
c84126_g1	probable inactive receptor kinase At1g27190	8.54733	31.5113	1.98282e-08	1.8074e-06
c81009_g3	elongation factor 1-gamma-like	6.83588	31.4824	2.01255e-08	1.82489e-06
c87604_g2	flocculation FLO11-like isoform X1///two-component response regulator ARR11	5.68157	31.4308	2.06671e-08	1.86424e-06
c87936_g2	hypothetical protein SOVF_021510	6.03329	31.2917	2.22024e-08	1.99235e-06
c88310_g3	NADH dehydrogenase (ubiquinone) complex assembly factor 6	1.18577	31.2669	2.24876e-08	2.00754e-06
c93848_g3	disease resistance RGA1///disease resistance RGA2-like	1.43022	31.2221	2.30126e-08	2.04387e-06
c87259_g5	peroxidase 40-like///peroxidase 40	6.83287	31.2005	2.3271e-08	2.05628e-06
c73748_g2	probable mitochondrial chaperone BCS1-B	4.36724	30.784	2.88402e-08	2.53545e-06
c90065_g4	pentatricopeptide repeat-containing At5g56310	3.33145	30.6188	3.14043e-08	2.74692e-06
c74204_g3	axial regulator YABBY 5	5.33279	30.5274	3.29183e-08	2.86489e-06
c53374_g1	homologous-pairing 2 homolog	5.40662	30.4185	3.48197e-08	3.01521e-06
c74436_g3	cytochrome P450 71A22-like	0.976895	30.3314	3.64191e-08	3.13802e-06
c89953_g2	ATP binding	7.75316	30.1166	4.06836e-08	3.48811e-06
c86812_g8	piriformospora indica-insensitive 2	4.54573	30.0746	4.15737e-08	3.54687e-06
c86224_g2	probable phosphatase 2C 14	4.95454	29.9326	4.4733e-08	3.7977e-06
c78763_g2	Retrovirus-related Pol poly from transposon TNT 1-94///fatty acyl- reductase 2-like	2.90777	29.8883	4.57662e-08	3.86647e-06
c78209_g15	probable S-acyltransferase 19	6.38979	29.8294	4.71774e-08	3.96634e-06
c72996_g6	MADS-box CMB1-like///MADS-box CMB1	2.29418	29.6751	5.10871e-08	4.27428e-06
c79135_g2	40S ribosomal SA-like	7.35083	29.6045	5.2983e-08	4.4116e-06
c81962_g1	B3 domain-containing Os04g0386900-like///B3 domain-containing Os04g0386900-like isoform X1	4.76201	29.5066	5.5728e-08	4.61796e-06
c88042_g3	---NA---///ubiquitin-60S ribosomal L40-like	2.82207	29.3208	6.13344e-08	5.05834e-06
c83309_g2	cytochrome b561 and DOMON domain-containing At5g47530-like	4.18159	29.2202	6.46027e-08	5.30263e-06
c83993_g1	probable N-acetyltransferase HLS1	4.03371	29.1135	6.82591e-08	5.57632e-06
c80771_g4	FAR1-RELATED SEQUENCE 5-like	0.917318	28.946	7.4425e-08	6.05148e-06
c85920_g3	probable inactive patatin 9	6.01904	28.9271	7.51541e-08	6.08222e-06
c72168_g3	F-box and associated interaction domains-containing isoform 2///F-box At3g07870-like isoform X1	1.0057	28.8221	7.93394e-08	6.39107e-06
c76851_g8	Homeobox-leucine zipper ATHB-54	4.95854	28.7599	8.19305e-08	6.56923e-06
c94726_g1	replication factor C subunit 2	6.78243	28.6488	8.67681e-08	6.92505e-06
c68828_g1	hypothetical protein SOVF_100620	7.35891	28.5676	9.04827e-08	7.18839e-06
c85137_g1	transcription factor ICE1-like	5.16542	28.4431	9.64914e-08	7.63075e-06
c70365_g1	probable xyloglucan endotransglucosylase hydrolase 25///probable xyloglucan endotransglucosylase hydrolase 23	1.50024	28.4062	9.83522e-08	7.74255e-06
c88683_g2	PREDICTED: uncharacterized protein LOC104888389	5.81149	28.3278	1.02412e-07	8.02567e-06
c87061_g8	PREDICTED: uncharacterized protein LOC104895084 isoform X2///hypothetical protein SOVF_018550	3.1042	28.1364	1.13058e-07	8.82006e-06
c86251_g1	ARM repeat superfamily isoform 3///U-box domain-containing 4	6.34323	28.1275	1.13582e-07	8.82123e-06
c90119_g1	60 kDa jasmonate-induced -like	2.76994	28.098	1.15328e-07	8.91678e-06
c87156_g1	catalytic Zinc CCHC- Peptidase///catalytic region Zinc CCHC-type Peptidase catalytic	1.80161	28.0457	1.18482e-07	9.11998e-06
c89473_g2	hypothetical protein SOVF_138000///PREDICTED: uncharacterized protein LOC104887544 isoform X1///hypothetical protein BVRB_2g041740	5.75864	28.0308	1.19401e-07	9.15003e-06
c79421_g5	probable indole-3-acetic acid-amido synthetase	5.74337	27.9381	1.25258e-07	9.55656e-06
c69305_g2	universal stress A	6.68709	27.9051	1.27416e-07	9.67861e-06
c87518_g2	E3 ubiquitin ligase BIG BROTHER	3.76727	27.8583	1.30535e-07	9.87221e-06
c81153_g1	zinc finger 4-like	4.70976	27.772	1.36486e-07	1.02774e-05
c84040_g1	Iojap- mitochondrial	6.37475	27.7278	1.39641e-07	1.04694e-05
c81296_g3	dynamin-related 1E///Dynamin-related 1E///dynamin-related 1E-like	1.42601	27.6807	1.43081e-07	1.06811e-05
c83802_g1	hypothetical protein SOVF_110970	2.41411	27.6058	1.48733e-07	1.10554e-05
c87927_g1	hypothetical protein SOVF_020600///PREDICTED: uncharacterized protein LOC103431786	2.57245	27.5973	1.49385e-07	1.10564e-05
c50743_g1	ARF guanine-nucleotide exchange factor GNL2	1.02547	27.5689	1.51597e-07	1.11724e-05
c73040_g1	SUMO-conjugating enzyme SCE1	6.71888	27.4668	1.59812e-07	1.17279e-05
c81545_g2	GDSL esterase lipase At5g41890	4.63707	27.4118	1.64428e-07	1.20157e-05
c91031_g2	BONZAI 3-like isoform X1///BONZAI 3	1.71663	27.3749	1.67593e-07	1.21956e-05
c90840_g8	probable mannitol dehydrogenase///probable cinnamyl alcohol dehydrogenase 9	-0.21137	27.2764	1.76351e-07	1.27791e-05
c87988_g3	formin 4	1.15959	27.2162	1.81925e-07	1.31282e-05
c67714_g2	ubiquitin ribosomal CEP52	4.82913	27.0958	1.93621e-07	1.38567e-05
c82296_g3	geranylgeranyl diphosphate chloroplastic-like	4.9605	27.0986	1.93342e-07	1.38567e-05
c91083_g1	protease Do-like 9 isoform X1	3.87766	27.0189	2.01478e-07	1.43597e-05
c84726_g2	beta-galactosidase 15-like	1.65289	26.9794	2.05635e-07	1.45959e-05
c77332_g1	uridine diphosphate glucose dehydrogenase	4.39238	26.9394	2.09933e-07	1.48402e-05
c83513_g1	probable ran guanine nucleotide release factor	4.99959	26.8951	2.148e-07	1.51224e-05
c74646_g7	mitogen-activated kinase kinase kinase 3-like	5.09081	26.834	2.21697e-07	1.55448e-05
c59398_g1	hemiasterlin resistant 1-like	3.91089	26.8009	2.25531e-07	1.57499e-05
c77037_g6	DNA polymerase delta subunit 3	5.64818	26.7858	2.27299e-07	1.57978e-05
c84367_g2	B3 domain-containing Os01g0723500-like	4.48512	26.7795	2.28042e-07	1.57978e-05
c89284_g4	PREDICTED: uncharacterized protein LOC104907268	1.53493	26.7161	2.35645e-07	1.62595e-05
c91049_g1	PREDICTED: uncharacterized protein LOC104908122///serine threonine- phosphatase 7 long form homolog///PREDICTED: uncharacterized protein LOC104878132	1.52181	26.6744	2.40786e-07	1.65483e-05
c86669_g1	UDP-rhamnose:rhamnosyltransferase 1	2.21309	26.6348	2.45777e-07	1.68046e-05
c86898_g1	SRG1-like///Codeine O-demethylase	0.860367	26.6295	2.46455e-07	1.68046e-05
c94786_g1	Ribonuclease III family	6.18246	26.496	2.6409e-07	1.79364e-05
c90657_g1	probable helicase MAGATAMA 3 isoform X1///probable helicase MAGATAMA 3 isoform X2	1.46884	26.4444	2.71232e-07	1.83495e-05
c92119_g2	60S ribosomal L3-2-like	6.65629	26.3782	2.80697e-07	1.89159e-05
c86798_g2	iron-sulfur cluster assembly 1-like	6.38341	26.3433	2.85807e-07	1.91856e-05
c90194_g1	pentatricopeptide repeat-containing mitochondrial-like	5.68132	26.2152	3.05412e-07	2.04225e-05
c73891_g1	disease resistance RGA1 isoform X1	0.441429	26.1986	3.08052e-07	2.05198e-05
c82287_g1	Thioredoxin isoform 1///Thioredoxin isoform 2///PREDICTED: uncharacterized protein LOC104903363///hypothetical protein SOVF_073580 isoform B	6.29574	26.1669	3.13149e-07	2.07794e-05
c78472_g1	auxin-responsive IAA9	7.70254	26.0439	3.33739e-07	2.20611e-05
c93341_g3	S-acyltransferase 8-like	4.75825	26.0109	3.39496e-07	2.23564e-05
c80304_g1	anthranilate synthase alpha subunit chloroplastic-like	2.92503	25.8842	3.6253e-07	2.37828e-05
c94776_g1	subtilisin-like protease	7.19984	25.6279	4.14002e-07	2.7057e-05
c87540_g2	peroxidase 3-like	1.8136	25.5726	4.26051e-07	2.77397e-05
c78672_g1	glutamate receptor -like	5.2067	25.5548	4.29984e-07	2.7891e-05
c83613_g2	cycloartenol-C-24-methyltransferase///Sterol methyltransferase 1	7.1964	25.271	4.98144e-07	3.21916e-05
c77457_g5	F-box SKIP23-like	3.44891	25.1562	5.28706e-07	3.40396e-05
c79155_g5	WUSCHEL-related homeobox 9-like isoform X1	1.11125	25.1223	5.38082e-07	3.45149e-05
c85488_g5	B3 domain-containing Os01g0723500-like	-0.0187634	25.1148	5.4017e-07	3.4521e-05
c69088_g1	uncharacterized aarF domain-containing kinase chloroplastic///uncharacterized aarF domain-containing kinase chloroplastic isoform X1	6.48239	24.9945	5.74937e-07	3.66079e-05
c85050_g6	PREDICTED: uncharacterized protein LOC104907276	3.80942	24.9178	5.98265e-07	3.79537e-05
c82398_g4	Indole-3-acetate O-methyltransferase 1	3.86639	24.8937	6.05788e-07	3.82907e-05
c80147_g6	hypothetical protein VITISV_041217///PREDICTED: uncharacterized protein LOC104878368///Retrovirus-related Pol poly from transposon TNT 1-94	0.514392	24.8831	6.09151e-07	3.83632e-05
c77794_g4	glutathione S-transferase F13	5.27216	24.7944	6.37841e-07	4.00245e-05
c89751_g1	neutral invertase	6.94634	24.7762	6.43893e-07	4.02584e-05
c73514_g3	B-zip transcription factor	5.04795	24.6825	6.75964e-07	4.21116e-05
c92727_g1	RING-finger ubiquitin ligase	5.1182	24.649	6.87804e-07	4.26956e-05
c94154_g1	PREDICTED: uncharacterized protein LOC104891772///topoisomerase I	8.77752	24.4932	7.45723e-07	4.61256e-05
c94469_g1	A Chain Sugar Beet Alpha-glucosidase With Acarbose	4.272	24.4739	7.53217e-07	4.64234e-05
c71920_g1	cold shock domain-containing 3-like	3.1536	24.4636	7.57285e-07	4.64625e-05
c76888_g3	disease resistance RGA2-like	0.958496	24.4587	7.59218e-07	4.64625e-05
c71378_g2	serine threonine- phosphatase 7 long form homolog	1.78028	24.3533	8.01873e-07	4.89001e-05
c90685_g1	PREDICTED: uncharacterized protein LOC104901027///PREDICTED: uncharacterized protein LOC104896593///retrotransposon unclassified	2.76043	24.3203	8.15756e-07	4.95722e-05
c92040_g2	probable serine threonine- kinase At1g18390///probable serine threonine- kinase At1g18390 isoform X1	4.26716	24.1892	8.73202e-07	5.28776e-05
c68850_g1	HVA22 c	3.97055	24.159	8.87012e-07	5.35267e-05
c87045_g2	reticulon B5///seed maturation///reticulon B4	6.13057	24.1303	9.0032e-07	5.41411e-05
c73941_g8	ribonuclease H At1g65750	0.979484	24.0739	9.27077e-07	5.55572e-05
c77301_g2	probable serine threonine- kinase DDB_G0278665	2.27387	24.0131	9.5682e-07	5.71419e-05
c85455_g3	scarecrow 30	4.243	23.9471	9.90216e-07	5.89332e-05
c73339_g3	G-type lectin S-receptor-like serine threonine- kinase At1g11330///G-type lectin S-receptor-like serine threonine- kinase At1g11330 isoform X1///Serine threonine kinases,ATP binding,sugar binding,kinases,carbohydrate	5.84323	23.8678	1.03186e-06	6.12012e-05
c72228_g2	NRT1 PTR FAMILY -like	2.44635	23.8582	1.03698e-06	6.12949e-05
c86970_g2	probable pectinesterase pectinesterase inhibitor 12	5.35127	23.819	1.05834e-06	6.23448e-05
c83913_g2	tyrosine-specific transport 2-like///Tryptophan tyrosine permease	1.4443	23.7906	1.07408e-06	6.26331e-05
c91636_g1	---NA---	1.96136	23.7956	1.07129e-06	6.26331e-05
c94164_g1	F-box kelch-repeat At3g23880-like	3.83537	23.7917	1.07347e-06	6.26331e-05
c93351_g1	hypothetical protein BVRB_4g091320///C globular	2.19238	23.7773	1.08152e-06	6.28553e-05
c78813_g2	E3 ubiquitin ligase RIE1-like	1.22707	23.6891	1.13222e-06	6.55817e-05
c90903_g2	BTB POZ domain-containing NPY4///BTB POZ domain-containing NPY2	6.13506	23.6404	1.16126e-06	6.70397e-05
c88320_g1	U-box domain-containing 44-like	7.28109	23.5959	1.18839e-06	6.83781e-05
c82071_g2	uncharacterized bolA	4.45842	23.575	1.20136e-06	6.88953e-05
c76056_g4	CBL-interacting serine threonine- kinase 7-like	0.287655	23.2981	1.38737e-06	7.92998e-05
c80248_g3	germin 2-1	7.46214	23.2698	1.40791e-06	8.02093e-05
c80065_g1	phosphoinositide phospholipase C 4-like	0.231742	23.2361	1.43284e-06	8.13618e-05
c91665_g2	probable F-box At3g61730///F-box FBD LRR-repeat At1g78760	2.37514	23.1793	1.47575e-06	8.35245e-05
c83966_g1	subfamily C member 2///RADIALIS-like 2	6.62044	23.1359	1.50949e-06	8.5156e-05
c82664_g3	spermidine synthase 1	8.63887	23.0946	1.54224e-06	8.67207e-05
c71860_g1	dof zinc finger -like	5.59998	23.0845	1.55037e-06	8.68962e-05
c80515_g2	transcription factor TGA2 isoform X1	5.13657	23.0531	1.57586e-06	8.80398e-05
c94055_g1	isoform 1///hypothetical protein SOVF_195260	5.10878	23.0143	1.60801e-06	8.95472e-05
c87100_g1	PREDICTED: uncharacterized protein LOC104885266///PREDICTED: uncharacterized protein LOC104891244///PREDICTED: uncharacterized protein LOC104908911	1.16088	22.957	1.65666e-06	9.19606e-05
c75985_g3	protease Do-like 9	3.34712	22.9241	1.68528e-06	9.32504e-05
c91615_g2	65-kDa microtubule-associated 3-like	6.38084	22.9165	1.69193e-06	9.33201e-05
c84970_g1	floral homeotic PMADS 2-like	7.9499	22.9023	1.70445e-06	9.37123e-05
c76966_g1	PREDICTED: uncharacterized protein LOC104908506 isoform X1	4.28643	22.8619	1.7407e-06	9.54027e-05
c77889_g1	cytochrome P450 734A1-like	0.363493	22.8192	1.77981e-06	9.72381e-05
c85067_g1	GPI ethanolamine phosphate transferase 1 isoform X2///phosphatidylinositolglycan class N///GPI ethanolamine phosphate transferase 1///GPI ethanolamine phosphate transferase 1 isoform X1	5.57337	22.7403	1.85442e-06	0.000100996
c83415_g2	cyclin-D4-1-like///carboxy-terminal domain cyclin	6.20815	22.7079	1.88586e-06	0.000102386
c79992_g3	GRIP1-associated 1///coiled-coil domain-containing SCD2	7.06786	22.5953	1.99971e-06	0.000108228
c86393_g1	UPF0481 At3g47200-like	5.64882	22.4282	2.18147e-06	0.000117697
c66918_g1	PREDICTED: uncharacterized protein LOC104893398 isoform X1	1.43773	22.4166	2.19472e-06	0.000118045
c81791_g1	wall-associated receptor kinase 2-like	3.7742	22.3906	2.22456e-06	0.000119279
c72982_g1	U-box domain-containing 11	5.85207	22.3211	2.30661e-06	0.000123297
c87061_g7	plant phospholipase///PREDICTED: uncharacterized protein LOC104895084 isoform X1	3.09805	22.2753	2.36227e-06	0.000125883
c68556_g1	histone H2A family///histone	7.12436	22.157	2.51244e-06	0.000133475
c92711_g4	probable galacturonosyltransferase 9	5.79505	22.113	2.57067e-06	0.000136151
c78666_g2	ribonuclease 1-like	6.51277	21.9927	2.73695e-06	0.000144354
c80436_g1	cathepsin B-like cysteine protease///cathepsin B-like///cathepsin B	5.96425	21.989	2.74223e-06	0.000144354
c80479_g2	Spectrin beta brain 3///PREDICTED: uncharacterized protein LOC104900320	7.01834	21.9311	2.82617e-06	0.000148323
c76598_g1	probable glutathione S-transferase///glutathione S-transferase U7-like	3.66999	21.8527	2.94409e-06	0.000154044
c76877_g1	F-box LRR-repeat At3g26922-like	5.42699	21.7303	3.13791e-06	0.0001632
c81922_g2	PREDICTED: uncharacterized protein LOC105638918	-0.396368	21.7321	3.13494e-06	0.0001632
c84158_g8	YLS9-like	1.26092	21.6964	3.19395e-06	0.000165617
c85920_g2	probable inactive patatin 9	4.88857	21.6559	3.26205e-06	0.000168643
c84780_g6	cyclin-B3-1 isoform X1///cyclin-B3-1 isoform X2	5.47842	21.5861	3.3829e-06	0.00017437
c90136_g1	probable WRKY transcription factor 15 isoform X2	4.99699	21.5658	3.41896e-06	0.000175706
c84264_g3	F-box family	2.06476	21.5361	3.47234e-06	0.000177921
c85861_g1	notchless homolog	4.24769	21.5064	3.52647e-06	0.000180162
c66219_g1	lipoxygenase chloroplastic	6.23681	21.4974	3.54316e-06	0.000180482
c77781_g2	Rab5-interacting family///hypothetical protein SOVF_185120	3.54568	21.4319	3.66623e-06	0.000186204
c87641_g2	alpha-amylase partial	5.52162	21.4037	3.72051e-06	0.000188408
c86244_g3	TBC domain-containing///TBC1 domain family member 15///TBC1 domain family member 15 isoform X1	3.75944	21.2492	4.03275e-06	0.000203625
c93267_g3	probable inactive purple acid phosphatase 2	3.47011	21.228	4.07758e-06	0.00020529
c76553_g1	pyruvate decarboxylase 2	3.65322	21.2012	4.13497e-06	0.000207576
c92353_g2	probable serine threonine- kinase WNK10	4.38865	21.1514	4.24401e-06	0.000212434
c85352_g1	aspartokinase chloroplastic isoform X1///Aspartate kinase 3 isoform 3///aspartokinase chloroplastic isoform X2///aspartokinase chloroplastic-like	7.19822	21.0915	4.37855e-06	0.000218537
c87478_g2	isoflavone 2 -hydroxylase-like///cytochrome P450 81D11-like///cytochrome P450 81E8-like	4.99074	21.0383	4.50198e-06	0.000224051
c86944_g2	leucine-rich repeat extensin 4	5.59853	21.01	4.56903e-06	0.000226736
c79999_g2	HAPLESS 2	0.957305	20.7893	5.1268e-06	0.000253688
c88673_g2	serine threonine- phosphatase 7 long form homolog	1.97788	20.7463	5.24322e-06	0.00025871
c90305_g3	thaumatin 1b	2.1565	20.7375	5.26751e-06	0.000259171
c73719_g1	transcription initiation factor TFIID subunit 15-like///Ran BP2 NZF zinc finger	5.47431	20.6927	5.39203e-06	0.000263798
c93804_g1	PREDICTED: uncharacterized protein LOC104890005 isoform X2///cinnamoyl- reductase 1-like	6.14159	20.6953	5.38488e-06	0.000263798
c74145_g3	NAC transcription factor ONAC010-like	-0.00125435	20.6648	5.47116e-06	0.000266916
c89224_g1	Zinc finger family	1.94313	20.6536	5.50329e-06	0.000267729
c93132_g4	SAFB-like transcription modulator	1.19514	20.5659	5.76142e-06	0.000279502
c81613_g2	anthocyanidin 5,3-O-glucosyltransferase-like	4.85281	20.5583	5.78417e-06	0.000279821
c83131_g4	disease resistance	2.99839	20.5015	5.95838e-06	0.000287446
c75336_g2	dnaJ homolog	4.49064	20.4681	6.06331e-06	0.000291696
c82166_g2	squamosa promoter-binding 8	7.70393	20.4495	6.12253e-06	0.000293729
c81307_g3	PREDICTED: uncharacterized protein LOC104902539 isoform X2	4.7964	20.4179	6.22452e-06	0.000297797
c77235_g1	ethylene-responsive transcription factor At4g13040	2.65165	20.3726	6.3737e-06	0.000304094
c76052_g1	multifunctional methyltransferase subunit TRM112 At1g22270	5.84392	20.3597	6.41685e-06	0.000304686
c87743_g1	serine threonine- kinase BRI1-like 2	3.3206	20.3583	6.42129e-06	0.000304686
c80598_g2	delta(7)-sterol-C5(6)-desaturase-like///WD repeat-containing WRAP73 isoform X1	6.15547	20.3224	6.54317e-06	0.000309621
c94919_g4	probable leucine-rich repeat receptor kinase At1g68400	7.1725	20.2685	6.73011e-06	0.000317599
c93267_g4	probable inactive purple acid phosphatase 2	4.07933	20.2029	6.96488e-06	0.000327785
c77816_g2	transcription factor HBI1	1.79265	20.1872	7.02212e-06	0.000329583
c78855_g1	Zinc finger family	2.69175	20.1553	7.14025e-06	0.000334221
c83537_g1	calcineurin B 4///calcineurin B 7///MADS-box FBP24 isoform X1	1.42565	20.1484	7.16594e-06	0.00033452
c62252_g1	OPA3	3.79842	20.1353	7.21536e-06	0.000335052
c78682_g1	mitochondrial isoform X1	0.553767	20.1351	7.21603e-06	0.000335052
c84106_g1	UPF0481 At3g47200-like	0.251483	20.0963	7.36397e-06	0.000341007
c75110_g1	probable receptor kinase TMK1	5.88456	20.0566	7.51842e-06	0.00034723
c76599_g4	wall-associated receptor kinase 2-like	0.470868	20.0305	7.62175e-06	0.000351067
c79369_g11	NADH dehydrogenase subunit B///NADH dehydrogenase subunit 2 (chloroplast)	1.26367	19.9886	7.79041e-06	0.000357026
c91253_g1	B3 domain-containing Os01g0905400-like///B3 domain-containing At5g60130-like///hypothetical protein SOVF_135460	5.72151	19.9881	7.79236e-06	0.000357026
c94293_g1	hypothetical protein SOVF_170270	4.4283	19.8356	8.43959e-06	0.00038566
c80167_g4	UPF0503 chloroplastic-like	5.93618	19.811	8.54898e-06	0.000389631
c88023_g4	rhodanese-like domain-containing chloroplastic	4.61775	19.781	8.6841e-06	0.00039475
c80341_g2	Calmodulin-binding isoform 2	5.98011	19.7712	8.72873e-06	0.000395741
c69982_g1	serine carboxypeptidase-like 51///Serine carboxypeptidase-like 51	3.81197	19.7365	8.88858e-06	0.000401936
c86994_g4	CMV 1a interacting 1///CMV 1a interacting expressed///CMV 1a interacting	5.80886	19.7301	8.9187e-06	0.000402247
c82492_g2	ureide permease 1-like	2.13629	19.717	8.97974e-06	0.000403949
c84562_g6	Chalcone synthase	5.32393	19.6981	9.06892e-06	0.000406903
c91562_g2	LRR receptor-like serine threonine- kinase ERL1	5.42314	19.6606	9.24872e-06	0.000413898
c52318_g1	red chlorophyll catabolite reductase///Red chlorophyll catabolite reductase	5.65805	19.5927	9.58337e-06	0.000427769
c94915_g1	dynein light chain cytoplasmic-like	0.209743	19.5877	9.60868e-06	0.000427796
c81475_g4	PREDICTED: uncharacterized protein LOC104884627	6.16303	19.5774	9.66031e-06	0.000428992
c82536_g3	60 kDa jasmonate-induced -like	3.29993	19.5597	9.75053e-06	0.000431891
c81720_g1	60S ribosomal L7-2-like///60S ribosomal L7-2	6.8827	19.5167	9.97245e-06	0.000440594
c73357_g1	hemiasterlin resistant 1-like	8.5476	19.4655	1.02433e-05	0.00044686
c77866_g2	chloroplastic-like	5.81061	19.4772	1.0181e-05	0.00044686
c80263_g1	2-methylene-furan-3-one reductase	7.50852	19.4674	1.02331e-05	0.00044686
c88700_g3	probable mannitol dehydrogenase	3.67421	19.4692	1.02234e-05	0.00044686
c89333_g1	probable transcriptional regulator SLK2 isoform X2///transcriptional corepressor SEUSS-like///probable transcriptional regulator SLK2 isoform X1	1.45337	19.4741	1.01976e-05	0.00044686
c92579_g1	transcription factor GAMYB///transcription factor GAMYB-like	3.56832	19.3806	1.07088e-05	0.000465994
c79914_g8	eukaryotic translation initiation factor 4B family	6.32418	19.3749	1.0741e-05	0.000466225
c73220_g2	cyclin-D1-binding 1 homolog	3.63665	19.3652	1.07958e-05	0.00046743
c52094_g2	inactive leucine-rich repeat receptor kinase CORYNE	4.05618	19.3367	1.09582e-05	0.000473279
c80036_g2	FAR-RED IMPAIRED RESPONSE 1 isoform X1	5.7818	19.3102	1.11112e-05	0.000478692
c85647_g1	hypothetical protein SOVF_174050///isoform 1	7.25691	19.2932	1.12105e-05	0.000481775
c92483_g4	ankyrin repeat-containing At3g12360-like	1.96401	19.2214	1.16399e-05	0.000498988
c69938_g1	cytokinin dehydrogenase 3	3.45083	19.1584	1.20306e-05	0.000514466
c82711_g1	probable glutathione S-transferase	5.62649	19.1295	1.22141e-05	0.000521024
c92517_g5	transcription factor bHLH96	4.87076	19.1151	1.23064e-05	0.000523674
c80155_g5	tetraketide alpha-pyrone reductase 2	5.19338	19.0967	1.24257e-05	0.000527454
c80694_g2	Lojap-related isoform 2///chloroplastic	5.68337	19.05	1.27338e-05	0.000539211
c82199_g2	ethylene-responsive transcription factor ERF062///ethylene-responsive transcription factor ERF062-like	0.425314	18.9866	1.31639e-05	0.000556064
c87131_g2	replication factor-A///replication A 70 kDa DNA-binding subunit C-like	0.127721	18.9722	1.32635e-05	0.000558905
c92186_g1	WUSCHEL-related homeobox 8	4.89974	18.9355	1.3521e-05	0.000568374
c94994_g1	LRR receptor-like serine threonine- kinase GSO1	4.22253	18.8927	1.38278e-05	0.000579864
c89395_g1	solute carrier family 25 member 44-like	4.06541	18.8129	1.44191e-05	0.000601747
c93788_g4	kinesin NACK1	5.94943	18.8129	1.44191e-05	0.000601747
c77433_g1	single-stranded DNA-binding WHY1///Protease -2///single-stranded DNA-binding chloroplastic-like isoform X3	3.95495	18.7856	1.46265e-05	0.000608932
c78941_g3	serine threonine- phosphatase 7 long form homolog///hypothetical protein	3.61107	18.7597	1.4827e-05	0.0006158
c74322_g1	Thioredoxin superfamily	6.03952	18.7498	1.49035e-05	0.000617498
c79984_g4	dehydration-responsive element-binding 1A-like	5.55693	18.7421	1.49645e-05	0.000618544
c82302_g8	AP2-like ethylene-responsive transcription factor AIL5 isoform X1///retroelement pol poly -like	4.83644	18.695	1.53381e-05	0.000632476
c87013_g1	PREDICTED: uncharacterized protein LOC104882940	6.17475	18.6845	1.54231e-05	0.000634471
c94885_g2	probable polygalacturonase non-catalytic subunit JP650	7.81434	18.6755	1.5496e-05	0.000635959
c77620_g3	shaggy-related kinase eta isoform X1///shaggy-related kinase zeta isoform X2	6.23277	18.5816	1.62781e-05	0.000666477
c75309_g2	mechanosensitive ion channel 4-like isoform X2///mechanosensitive ion channel 9-like isoform X1	-0.528677	18.5337	1.66928e-05	0.000679782
c91228_g3	thioredoxin chloroplastic///prostamide prostaglandin F synthase isoform X1	2.74252	18.5381	1.66543e-05	0.000679782
c92429_g1	serine carboxypeptidase-like 18///serine carboxypeptidase-like 18 isoform X1	2.20534	18.5305	1.67208e-05	0.000679782
c83470_g1	acyl- --sterol O-acyltransferase 1-like	1.87727	18.5149	1.68582e-05	0.000682167
c92276_g1	NRT1 PTR FAMILY///NRT1 PTR FAMILY isoform X1	5.47185	18.5168	1.68411e-05	0.000682167
c86405_g2	beta-amylase-like///beta-amylase	7.81627	18.4425	1.75111e-05	0.000706935
c77617_g5	serine threonine- kinase CDL1-like isoform X2///serine threonine- kinase CDL1-like	5.1525	18.4313	1.76144e-05	0.000709451
c91377_g2	Lactoylglutathione lyase glyoxalase I family	6.40878	18.4187	1.77311e-05	0.000712496
c95012_g1	protochlorophyllide reductase-like///protochlorophyllide reductase	7.8064	18.3359	1.85183e-05	0.000742406
c82382_g7	gag-pol identical	1.03364	18.3301	1.85745e-05	0.000742938
c82192_g1	PREDICTED: uncharacterized protein LOC104897807///unnamed protein product	3.91733	18.2799	1.90704e-05	0.000761015
c77785_g3	glycine-rich RNA-binding mitochondrial	5.94438	18.2593	1.92778e-05	0.000767521
c94601_g1	L-aspartate chloroplastic	5.12894	18.2539	1.93328e-05	0.000767947
c78248_g8	phosphatidylglycerol phosphatidylinositol transfer DDB_G0282179	5.55747	18.232	1.95563e-05	0.000775047
c80809_g5	nad4 gene product (mitochondrion)	6.30228	18.2233	1.9646e-05	0.000776825
c78321_g3	fasciclin-like arabinogalactan 17	3.92788	18.1964	1.99255e-05	0.000785945
c90047_g3	Smr domain-containing	3.96134	18.1924	1.99674e-05	0.000785945
c69641_g2	tRNA (uracil(54)-C(5))-methyltransferase homolog-B	5.42579	18.1718	2.01843e-05	0.000792682
c83751_g1	transient receptor potential cation channel subfamily A member 1 homolog///ankyrin repeat-containing At5g02620-like	2.38206	18.1462	2.04582e-05	0.000801618
c92523_g2	mitochondrial alternative oxidase 2	5.79554	18.127	2.06653e-05	0.000807908
c75268_g2	formimidoyltransferase-cyclodeaminase-like isoform X1	6.89739	18.113	2.08172e-05	0.000810185
c87293_g7	heat shock cognate 70 kDa -like///heat shock cognate 70 kDa 2-like///probable mediator of RNA polymerase II transcription subunit 37c	0.262853	18.115	2.07959e-05	0.000810185
c87022_g11	ASPARTIC PROTEASE IN GUARD CELL 2	5.06369	18.0897	2.10743e-05	0.000818352
c80434_g1	upstream activation factor subunit UAF30	6.31288	18.0759	2.12268e-05	0.000822433
c78052_g1	flotillin 4	1.83074	18.0696	2.12973e-05	0.000823322
c85472_g1	probable indole-3-acetic acid-amido synthetase///probable indole-3-acetic acid-amido synthetase -like isoform X1	-0.121112	18.0148	2.19199e-05	0.000845502
c79963_g1	mitochondrial import inner membrane translocase subunit Tim16///mitochondrial import inner membrane translocase subunit tim16-like	4.90502	17.9283	2.29385e-05	0.000878919
c87841_g1	kinase-interacting family isoform X2///kinase-interacting family isoform X1	5.63261	17.93	2.29177e-05	0.000878919
c88457_g1	GDSL esterase lipase At5g45960-like	3.82572	17.9316	2.28984e-05	0.000878919
c65977_g1	transcription factor RF2b-like	0.399388	17.9205	2.30325e-05	0.000880575
c74349_g2	gag-pol poly	1.38199	17.8977	2.33105e-05	0.000887284
c74501_g15	trichome birefringence-like 38	0.629014	17.8996	2.32868e-05	0.000887284
c74141_g1	PREDICTED: uncharacterized protein LOC104895764 isoform X2///F Y rich carboxy-terminal	5.49584	17.8871	2.34408e-05	0.000890287
c94269_g1	4-coumarate-- ligase 2	6.84098	17.8777	2.35566e-05	0.000892729
c76352_g6	scarecrow 30///scarecrow 14	2.45089	17.7942	2.46133e-05	0.00092871
c87270_g2	probable phosphatase 2C 25	5.51158	17.7962	2.45871e-05	0.00092871
c82382_g4	AC079604_5 copia-type	2.86732	17.7852	2.47293e-05	0.000931059
c94538_g3	probable polygalacturonase	5.54445	17.7744	2.48711e-05	0.000934365
c48852_g1	transcription factor bHLH30	3.74975	17.745	2.52585e-05	0.000946522
c88068_g1	Magnesium transporter -like family isoform 1	2.63603	17.7415	2.5304e-05	0.000946522
c71533_g1	auxin-induced 15A///SAUR-like auxin-responsive family	0.739303	17.7316	2.54364e-05	0.000949423
c92749_g1	leucine-rich repeat receptor-like serine threonine tyrosine- kinase SOBIR1	7.63328	17.7098	2.57291e-05	0.000958284
c93065_g2	CRS2-associated factor chloroplastic	5.69161	17.7025	2.58293e-05	0.000959953
c74168_g1	glutamate synthase 1 [NADH] chloroplastic isoform X1	1.08368	17.683	2.60955e-05	0.000967769
c89247_g3	hypothetical protein BVRB_4g085350///PREDICTED: uncharacterized protein LOC104891332	4.22935	17.6303	2.68277e-05	0.000989687
c90018_g2	poly///PREDICTED: uncharacterized protein LOC104891162///hypothetical protein VITISV_041217///hypothetical protein VITISV_007281///hypothetical protein AALP_AAs62859U000100	0.230468	17.6304	2.68272e-05	0.000989687
c95144_g4	CDT1 chloroplastic	5.21628	17.6282	2.6858e-05	0.000989687
c82322_g3	protease Do-like 14 isoform X1	4.28622	17.6033	2.72111e-05	0.00100057
c84756_g2	zinc finger CONSTANS-LIKE 7	0.89241	17.585	2.74753e-05	0.00100815
c75172_g3	ATP-dependent chaperone	-0.100316	17.5595	2.78451e-05	0.00101955
c80015_g5	gag-pol poly	-0.150913	17.545	2.80586e-05	0.00102521
c91334_g3	chlorophyll a-b binding chloroplastic///AC079604_5 copia-type	8.50538	17.5387	2.81524e-05	0.00102647
c63322_g1	dnaJ homolog subfamily B member 1-like	4.63932	17.5295	2.8288e-05	0.00102924
c82578_g1	trichome birefringence-like 36	5.54744	17.5215	2.84083e-05	0.00103145
c71754_g1	glutamic acid-rich -like isoform X2///Chalcone-flavanone isomerase family isoform partial///chaperonin mitochondrial	5.72613	17.5115	2.85575e-05	0.00103192
c75307_g8	AC034258_20 helicase///AT hook motif-containing	1.56353	17.5104	2.85737e-05	0.00103192
c93069_g4	pentatricopeptide repeat-containing At5g56310-like	3.64809	17.5087	2.86e-05	0.00103192
c86733_g2	purple acid phosphatase 3-like///purple acid phosphatase 3	5.64537	17.4865	2.89351e-05	0.00104184
c72458_g1	RER1B-like	4.92334	17.4681	2.92173e-05	0.00104982
c94357_g1	WEB family chloroplastic isoform X2	5.89457	17.4608	2.93294e-05	0.00105167
c73907_g1	hypothetical protein SOVF_021500	6.89034	17.4365	2.97064e-05	0.00106299
c88588_g1	probable disease resistance At1g58602 isoform X1	3.27213	17.43	2.98091e-05	0.00106446
c68510_g1	CCLS4 protein///MROS3B///MROS3	11.1091	17.395	3.03616e-05	0.00108196
c94955_g3	anthocyanidin reductase	7.66776	17.3449	3.11739e-05	0.00110863
c75884_g12	B-box zinc finger 22///probable salt tolerance At1g78600	5.84959	17.3137	3.16892e-05	0.00112234
c84203_g1	ABC transporter C family member 14-like isoform X1///ABC transporter C family member 4///ABC transporter C family member 14-like	0.478823	17.3163	3.16467e-05	0.00112234
c75762_g4	molybdate-anion transporter-like	-0.302667	17.2726	3.23831e-05	0.00114458
c77101_g3	UBIQ_AVESA ame: Full=Ubiquitin///polyubiquitin isoform X1///ubiquitin	2.02442	17.2641	3.25269e-05	0.00114732
c81050_g2	glutaredoxin-C9-like	1.88248	17.2409	3.29273e-05	0.00115908
c81049_g5	pyrophosphate--fructose 6-phosphate 1-phosphotransferase subunit beta	4.5482	17.2282	3.31475e-05	0.00116286
c86369_g1	Microspore-specific promoter	-0.10398	17.227	3.31689e-05	0.00116286
c85424_g9	F-box At1g10780	5.34857	17.2135	3.34048e-05	0.00116876
c89398_g3	kinesin-3 isoform X2///psbQ chloroplastic///kinesin-3 isoform X1	5.97274	17.1959	3.37156e-05	0.00117726
c74011_g1	chlorophyll a-b binding chloroplastic	8.45735	17.1341	3.48321e-05	0.0012138
c94328_g3	extra-large guanine nucleotide-binding 3 isoform X1	0.079209	17.1226	3.50423e-05	0.00121867
c85867_g2	blue copper -like	2.00541	17.0992	3.54765e-05	0.0012313
c82758_g3	SAWADEE HOMEODOMAIN HOMOLOG 2 isoform X1///hypothetical protein SOVF_023560	4.85126	17.0806	3.58263e-05	0.00124095
c75644_g2	hypothetical protein CICLE_v10029343mg	2.39561	17.0743	3.59445e-05	0.00124256
c89648_g2	internal alternative NAD(P)H-ubiquinone oxidoreductase mitochondrial-like	3.75136	17.0525	3.63604e-05	0.00125443
c89392_g1	F-box only 15	0.500341	17.0291	3.68108e-05	0.00126493
c93461_g7	ABC transporter C family member 14-like isoform X1	1.50113	17.0296	3.68019e-05	0.00126493
c81769_g6	probable inactive receptor kinase At1g65250 isoform X1	-0.442595	16.9869	3.76382e-05	0.0012908
c85091_g1	wall-associated receptor kinase 3-like///wall-associated receptor kinase 4-like///wall-associated receptor kinase-like 16	-0.32631	16.9827	3.77222e-05	0.00129113
c87816_g4	polyamine oxidase-like	5.26255	16.9724	3.79264e-05	0.00129301
c94074_g1	subtilisin-like protease	6.99775	16.9752	3.78713e-05	0.00129301
c86630_g1	phospholipase A1-IIdelta	0.490357	16.9596	3.81834e-05	0.00129666
c94269_g2	dentin sialophospho	6.09976	16.9608	3.81605e-05	0.00129666
c92835_g3	ABC transporter G family member 29-like	2.54446	16.9203	3.8983e-05	0.00132123
c86823_g1	BAG family molecular chaperone regulator 6	3.23359	16.9112	3.91706e-05	0.00132499
c79496_g4	very-long-chain (3R)-3-hydroxyacyl- dehydratase PASTICCINO 2///very-long-chain (3R)-3-hydroxyacyl- dehydratase PASTICCINO 2A-like	6.71009	16.892	3.9568e-05	0.00133323
c93362_g2	Cytochrome family subfamily polypeptide 1 isoform 1	3.1271	16.8953	3.94994e-05	0.00133323
c75014_g1	peroxidase 72-like	3.48633	16.8734	3.99585e-05	0.00134377
c80532_g5	cytochrome b5 isoform E///cytochrome b5-like heme steroid-binding domain	6.56489	16.862	4.01977e-05	0.00134919
c86853_g2	F-box interaction domain///F-box At3g17480	1.03536	16.8549	4.03495e-05	0.00135167
c86639_g4	GDSL esterase lipase At4g16230-like	2.15315	16.85	4.04523e-05	0.0013525
c76085_g1	M-phase phospho 6 isoform X1///PREDICTED: uncharacterized protein LOC104900087	2.80227	16.8457	4.05453e-05	0.00135299
c81598_g1	trafficking particle complex subunit 4	4.8911	16.7798	4.1977e-05	0.00139539
c90086_g1	inositol oxygenase 1-like///myo-inositol oxygenase	3.80221	16.7827	4.19143e-05	0.00139539
c83462_g1	hypothetical protein SOVF_091060 isoform B///hypothetical protein SOVF_091060 isoform A///PREDICTED: uncharacterized protein LOC103320283 isoform X1	3.33207	16.734	4.30031e-05	0.00142676
c90359_g2	60S ribosome subunit biogenesis NIP7 homolog///PREDICTED: uncharacterized protein LOC104893474///PREDICTED: uncharacterized protein LOC104899180	6.23879	16.7232	4.32486e-05	0.00143217
c77420_g1	factor of DNA methylation 1-like	0.90212	16.7044	4.36794e-05	0.00144367
c81080_g1	probable galacturonosyltransferase-like 1	4.14656	16.6089	4.5935e-05	0.00151533
c87357_g3	kinesin-4-like isoform X1///kinesin motor family///kinesin-4 isoform X2	4.04079	16.5722	4.68321e-05	0.00154199
c81923_g1	TIC chloroplastic	6.47237	16.491	4.88827e-05	0.00160645
c72169_g2	omega-hydroxypalmitate O-feruloyl transferase	2.97722	16.4846	4.9047e-05	0.0016088
c76413_g5	nonsense-mediated mRNA decay 2	5.6674	16.4609	4.96647e-05	0.00162598
c88135_g1	PREDICTED: uncharacterized protein LOC104894136///PREDICTED: uncharacterized protein LOC104894134 isoform X2	8.53878	16.432	5.04257e-05	0.00164778
c94189_g1	DNA repair REV1 isoform X1	4.31034	16.3768	5.1916e-05	0.00169328
c87065_g3	ROOT HAIR DEFECTIVE 3-like	3.45934	16.3605	5.23642e-05	0.00170469
c77776_g1	(3S,6E)-nerolidol synthase 1-like	2.60575	16.3463	5.27586e-05	0.00171431
c83719_g3	DNA (cytosine-5)-methyltransferase DRM2-like	6.72485	16.3053	5.3912e-05	0.00174851
c78224_g1	PREDICTED: uncharacterized protein LOC104889602	1.95581	16.2816	5.45926e-05	0.00176727
c78603_g5	trichome berefringence-like 7///trichome berefringence-like 7 isoform X1	4.86706	16.2352	5.59436e-05	0.00180426
c81397_g1	proteasome subunit beta type-5	8.26888	16.2353	5.59406e-05	0.00180426
c72932_g3	F-box LRR-repeat At3g58880	0.571467	16.2203	5.63858e-05	0.00181514
c65491_g1	subtilisin-like protease	4.64057	16.2032	5.68981e-05	0.00182485
c87183_g2	microtubule-associated 70-2-like	7.40935	16.2046	5.6857e-05	0.00182485
c92223_g2	fe(2+) transport 1-like	0.892937	16.1546	5.83763e-05	0.0018688
c89517_g1	probable leucine-rich repeat receptor kinase At5g49770	1.14514	16.0704	6.10315e-05	0.00195019
c80490_g1	ent-copalyl diphosphate chloroplastic	0.885867	16.0638	6.12423e-05	0.00195333
c93974_g2	F-box SKIP23-like///glutamate receptor -like	3.25142	16.0312	6.23058e-05	0.00198359
c92256_g1	laccase-17-like	1.69446	16.0219	6.2614e-05	0.00198975
c83762_g1	TIFY 10A-like	5.87966	16.0171	6.27734e-05	0.00199116
c82165_g2	probable histone H2A variant 1	6.69123	15.9661	6.44855e-05	0.00204173
c88227_g2	B3 domain-containing At5g66980	-0.0912283	15.9581	6.47591e-05	0.00204665
c87923_g4	pyruvate cytosolic isozyme-like	3.13715	15.8702	6.78397e-05	0.0021401
c95149_g1	cysteine-rich receptor-kinase///cysteine-rich receptor kinase 10	1.35975	15.8656	6.80028e-05	0.00214135
c66049_g5	beta-1,3-galactosyltransferase 15	3.43957	15.7987	7.04512e-05	0.00220802
c77856_g1	peptidyl-prolyl cis-trans isomerase FKBP62	4.80488	15.8009	7.03708e-05	0.00220802
c86417_g2	PREDICTED: uncharacterized protein LOC104887889 isoform X3///(S)-coclaurine N-methyltransferase isoform X4///(S)-tetrahydroprotoberberine N-methyltransferase isoform X4///hypothetical protein SOVF_178870///Cyclopropane-fatty-acyl-phospholipid synthase isoform 1	5.81661	15.7973	7.05025e-05	0.00220802
c67938_g1	peptide-N4-(N-acetyl-beta-glucosaminyl)asparagine amidase A-like///epidermis-specific secreted glyco EP1-like	4.90632	15.7935	7.06431e-05	0.00220843
c90943_g1	hyoscyamine 6-dioxygenase-like///2 -deoxymugineic-acid 2 -dioxygenase-like	3.03639	15.7497	7.2301e-05	0.00225618
c95079_g1	pentatricopeptide repeat-containing At1g60770	6.39375	15.7344	7.28853e-05	0.00227032
c94310_g1	mechanosensitive ion channel 9-like isoform X1	3.41758	15.6966	7.43582e-05	0.00231205
c92336_g2	serine threonine- kinase At5g01020	2.88576	15.6862	7.47694e-05	0.00232067
c77552_g1	cytochrome P450 89A2-like	3.05506	15.6729	7.52934e-05	0.00233275
c88814_g1	receptor kinase At4g00960///cysteine-rich receptor kinase 10	3.37038	15.6366	7.6756e-05	0.00237382
c71912_g1	beta-galactosidase 3-like	4.61278	15.6024	7.81568e-05	0.00241283
c80786_g5	glucosidase 2 subunit beta isoform X1///glucosidase 2 subunit beta	4.6196	15.5873	7.87822e-05	0.00242422
c93139_g1	ABC transporter G family member 35-like///ABC transporter G family member 29-like	3.45492	15.5867	7.88058e-05	0.00242422
c87257_g3	F-box WD repeat-containing 10	5.74872	15.579	7.91282e-05	0.00242983
c78124_g5	RING-H2 finger ATL78-like	3.833	15.5741	7.93329e-05	0.0024318
c84381_g1	---NA---	3.97322	15.5385	8.08435e-05	0.00247373
c93214_g2	DNA ligase 1-like	4.15509	15.508	8.21556e-05	0.00250944
c90342_g1	F-box FBD LRR-repeat At1g13570-like isoform X1	3.27217	15.4891	8.29821e-05	0.00253022
c75676_g6	pyruvate cytosolic isozyme-like	2.10704	15.4619	8.41863e-05	0.00255161
c88497_g2	CBS domain-containing CBSX5-like	2.28409	15.4645	8.40707e-05	0.00255161
c89859_g1	phosphatidylinositol 4-kinase gamma 8-like	1.27362	15.4636	8.41084e-05	0.00255161
c94518_g3	E3 ubiquitin ligase DRIP2	5.79331	15.4599	8.4273e-05	0.00255161
c91285_g6	uncharacterized serine-rich -like	5.65984	15.4473	8.48373e-05	0.00256422
c25551_g1	PREDICTED: uncharacterized protein LOC104884460	0.780459	15.434	8.54394e-05	0.00257792
c87407_g4	ribose-phosphate pyrophosphokinase mitochondrial	2.29023	15.422	8.59795e-05	0.0025897
c88558_g1	syntaxin-related KNOLLE	7.2833	15.3878	8.75502e-05	0.00263243
c85020_g2	uncharacterized membrane At1g06890	1.86586	15.3329	9.01324e-05	0.00270538
c88568_g7	PREDICTED: uncharacterized protein LOC104906507	1.68445	15.2889	9.22563e-05	0.00276434
c81014_g3	cysteine synthase	5.09062	15.2664	9.3363e-05	0.00279218
c82549_g2	pentatricopeptide repeat-containing chloroplastic	4.68439	15.2635	9.35079e-05	0.00279218
c73571_g2	serine carboxypeptidase-like 27	7.01585	15.2228	9.55444e-05	0.0028473
c82625_g4	TIFY 10A	8.71799	15.22	9.56829e-05	0.0028473
c90687_g9	acetylajmalan esterase-like	4.50942	15.1408	9.97833e-05	0.00296423
c74049_g5	ru large subunit-binding subunit chloroplastic	4.05211	15.1224	0.000100759	0.00298808
c69704_g1	cytochrome b5 isoform A	4.54285	15.0892	0.000102548	0.00303596
c66971_g5	phosphatidylinositol phosphatidylcholine transfer SFH11-like isoform X1	5.5764	15.073	0.000103434	0.00305696
c73881_g1	E3 ubiquitin- ligase RHA1B-like	3.73393	15.0501	0.000104694	0.00308367
c88727_g1	alpha-glucan H isozyme	8.41493	15.0503	0.000104684	0.00308367
c93194_g1	transcription factor MYC2-like	5.6284	15.0225	0.000106237	0.00312379
c75960_g1	DNA binding	4.5114	15.0049	0.000107233	0.00314774
c75020_g2	Nucleoporin isoform 1///nucleoporin GLE1	4.87986	14.998	0.000107628	0.00315399
c90190_g3	temperature-induced lipocalin	5.47055	14.9815	0.000108573	0.00317631
c84925_g2	ABC transporter G family member 11-like	2.19946	14.9291	0.000111627	0.00326016
c81504_g3	anthocyanidin 3-O-glucosyltransferase 2-like	2.04892	14.9097	0.000112781	0.00327177
c83200_g2	NADH dehydrogenase [ubiquinone] iron-sulfur mitochondrial	3.43718	14.9163	0.00011239	0.00327177
c89528_g1	plant F18B3-190	6.17406	14.9122	0.000112631	0.00327177
c90473_g3	TRANSPARENT TESTA 12///TRANSPARENT TESTA 12-like	8.93651	14.9099	0.000112768	0.00327177
c84429_g1	PREDICTED: uncharacterized protein LOC103343557///PREDICTED: uncharacterized protein LOC101212789///uncharacterized LOC100194135	3.68734	14.9015	0.000113271	0.00328049
c80378_g1	phospholipase A1- chloroplastic-like///phospholipase A1- chloroplastic	2.82242	14.8964	0.000113582	0.00328402
c66985_g1	RING-H2 finger ATL43	3.05238	14.8863	0.000114187	0.00329052
c94309_g2	DUF630 family///E3 ubiquitin- ligase XBAT35	6.20605	14.889	0.000114024	0.00329052
c83007_g3	AP2-like ethylene-responsive transcription factor ANT	6.58325	14.8668	0.000115378	0.00331934
c93130_g2	F-box At1g65770	3.83924	14.8509	0.000116352	0.00334179
c88833_g3	dentin sialophospho -like isoform X1///myb X	6.38574	14.8364	0.00011725	0.003362
c80826_g7	RNA-binding S4 domain-containing///RNA-binding ylmH	4.40108	14.8091	0.000118962	0.00340545
c93081_g2	exonuclease 1 isoform X2///exonuclease 1///exonuclease 1 isoform X1	0.838911	14.7929	0.000119988	0.00342918
c81519_g2	actin-depolymerizing factor 5	3.07682	14.7869	0.000120367	0.00343432
c93286_g1	hypothetical protein SOVF_103330///PREDICTED: uncharacterized protein LOC104894296 isoform X1///PREDICTED: uncharacterized protein LOC104894296 isoform X3	4.96499	14.774	0.000121197	0.00345233
c86286_g2	cytochrome P450 family 71///cytochrome P450 71A26-like///cytochrome P450 71A22-like	2.85786	14.7665	0.000121675	0.00346025
c80439_g5	disease resistance RGA1	-0.0413281	14.7337	0.000123812	0.00351524
c90065_g3	target of Myb 1-like	1.53347	14.7086	0.000125474	0.0035566
c72373_g1	phytochelatin synthetase family	-0.130156	14.7012	0.000125963	0.00356463
c89347_g2	two-component response regulator ARR1 isoform X1///two-component response regulator ARR2-like///two-component response regulator ARR1-like///two-component response regulator ARR1-like isoform X1	4.45907	14.6581	0.000128877	0.00363521
c89973_g1	phosphoglycolate phosphatase 2 isoform X1///phosphoglycolate phosphatase 2	5.08178	14.6583	0.000128867	0.00363521
c89180_g2	probable aminotransferase ACS12	1.81421	14.6527	0.000129253	0.00363988
c71912_g3	Beta-galactosidase 3 isoform 2///beta-galactosidase 3	4.32361	14.6211	0.000131438	0.00368345
c89721_g5	CRABS CLAW	4.01325	14.624	0.00013123	0.00368345
c94290_g2	antiviral alpha-like isoform X2///A Chain High Resolution Structure Of Recombinant Dianthin Antiviral -Potent Anti-Hiv Agent	9.23548	14.625	0.000131164	0.00368345
c74243_g7	mitochondrial isoform X1	0.845311	14.6058	0.000132507	0.00370743
c94537_g2	NADPH--cytochrome P450 reductase 2-like///NADPH--cytochrome P450 reductase	8.14595	14.5688	0.000135135	0.00377484
c94363_g6	retroelement pol poly	5.08158	14.5638	0.000135492	0.00377873
c84874_g2	ycf2 gene product (chloroplast)	3.85284	14.555	0.000136128	0.00379035
c86034_g2	HORMA domain-containing 1	6.00267	14.5317	0.00013782	0.0038313
c85745_g1	pectinesterase 1 precursor	6.29573	14.5284	0.000138066	0.00383199
c86194_g1	(3S,6E)-nerolidol synthase 1-like	1.00759	14.5125	0.000139235	0.00385827
c93330_g3	retrotransposon Ty1-copia subclass	0.0582343	14.4371	0.000144921	0.004003
c93387_g1	phragmoplast orienting kinesin 2///phragmoplast orienting kinesin 2 isoform X2	7.26901	14.4374	0.000144899	0.004003
c81725_g2	probable receptor kinase At1g67000	0.265554	14.4241	0.000145919	0.00402416
c75941_g1	probable histone	7.14591	14.3847	0.000149006	0.00409623
c78568_g1	zinc finger CONSTANS-LIKE 16///zinc finger CONSTANS-LIKE 16-like	5.17191	14.3865	0.000148867	0.00409623
c74052_g1	protease inhibitor seed storage lipid transfer family	3.80272	14.3672	0.0001504	0.00412802
c94501_g2	beta-xylosidase alpha-L-arabinofuranosidase 2-like	5.72647	14.36	0.000150973	0.00413719
c91605_g1	Gap junction beta-4 isoform 1	6.27286	14.3388	0.000152687	0.00417754
c91942_g2	phosphatidylinositol 4-kinase gamma 3	3.42787	14.332	0.000153241	0.00418608
c88183_g1	MAP3K-like kinase	1.99021	14.3015	0.000155739	0.00424764
c78197_g1	hypothetical protein SOVF_064810	5.72063	14.2982	0.000156015	0.00424847
c73759_g12	K+ uptake transporter 3 isoform 1	4.3454	14.2776	0.000157735	0.00428855
c85276_g1	H ACA ribonucleo complex subunit 1 1	7.51335	14.2698	0.000158383	0.00429943
c71462_g4	hypothetical retrotransposon	2.93167	14.2668	0.000158642	0.00429972
c82333_g4	---NA---///Stress responsive A B Barrel Domain	6.89928	14.2179	0.000162817	0.00439911
c85283_g1	50S ribosomal chloroplastic	7.69168	14.2181	0.000162795	0.00439911
c86923_g1	peptidyl-prolyl cis-trans isomerase CYP18-1	5.27974	14.2111	0.000163403	0.00440807
c88193_g2	---NA---///hypothetical protein SORBIDRAFT_01g006510///PREDICTED: uncharacterized protein LOC104894426 isoform X2	5.78599	14.1928	0.000164997	0.00444413
c78608_g3	UPSTREAM OF FLC	4.88107	14.1712	0.000166905	0.00448159
c80558_g1	GDSL esterase lipase EXL3-like///GDSL esterase lipase EXL3	2.63781	14.1716	0.000166868	0.00448159
c89650_g2	deoxyribodipyrimidine photo-lyase	4.34314	14.1595	0.000167947	0.00450258
c82525_g2	nucleosome assembly 1 1-like///nucleosome assembly 1 2-like	2.04775	14.1382	0.000169856	0.00454673
c87682_g6	oligomycin sensitivity conferring	7.58309	14.1256	0.000170996	0.00457019
c87655_g2	---NA---	8.23114	14.1218	0.000171348	0.00457253
c81393_g1	Retinoblastoma-binding 5	-0.0437773	14.1054	0.00017285	0.00459269
c81492_g1	epoxide hydrolase 3	0.0150096	14.1044	0.000172938	0.00459269
c87145_g4	cytoskeletal Sojo isoform X2	6.95383	14.1095	0.000172471	0.00459269
c94684_g3	probable leucine-rich repeat receptor kinase At5g49770	1.45855	14.102	0.000173164	0.00459269
c89437_g2	PREDICTED: uncharacterized protein LOC104894795	5.56381	14.074	0.00017576	0.00465442
c88244_g4	mitochondrial import receptor subunit TOM40-1-like///katanin p80 WD40 repeat-containing subunit B1 homolog isoform X1	2.40372	14.058	0.00017726	0.00468697
c94365_g2	4,5-dioxygenase	7.05056	14.0486	0.000178147	0.00470325
c89611_g3	nucleolin-like isoform X2	5.80425	14.0282	0.000180091	0.0047401
c93853_g1	proteasome subunit alpha type-7///L-ascorbate peroxidase peroxisomal///Ascorbate peroxidase	8.26672	14.029	0.000180009	0.0047401
c92614_g4	anthocyanidin 3-O-glucosyltransferase 2-like	1.81228	13.9959	0.000183205	0.00481476
c83083_g3	hypothetical protein SOVF_075590///Ribosomal RNA large subunit methyltransferase I	7.20665	13.9924	0.000183551	0.00481655
c86915_g2	neurofilament medium polypeptide-like	6.30919	13.9748	0.000185281	0.00485459
c91148_g1	probable glycerol-3-phosphate acyltransferase 3///adenine phosphoribosyltransferase 5///adenine phosphoribosyltransferase 5-like	7.23242	13.9557	0.000187169	0.00489665
c94716_g3	U-box domain-containing 8	5.08364	13.9511	0.000187624	0.00490114
c89865_g1	disease resistance RGA3	2.16004	13.9476	0.000187978	0.00490299
c89613_g13	Lateral root primordium -related isoform partial	4.22205	13.939	0.000188844	0.00491819
c70855_g1	UPF0496 At4g34320-like	3.80764	13.9106	0.000191718	0.00498552
c75306_g1	uncharacterized acetyltransferase At3g50280-like	3.34457	13.8952	0.000193292	0.00501893
c75057_g2	peptidyl-prolyl cis-trans isomerase	1.98525	13.8778	0.000195094	0.00505812
c78076_g5	NRT1 PTR FAMILY///NRT1 PTR FAMILY -like	1.61205	13.8353	0.000199551	0.00516595
c79138_g1	maternal effect embryo arrest 18- partial///maternal effect embryo arrest 18///PREDICTED: uncharacterized protein YNL011C isoform X2	4.73625	13.8093	0.000202331	0.00523011
c81069_g2	expansin 2 precursor	5.61431	13.792	0.000204207	0.00525589
c91825_g6	mediator-associated 1-like	5.91656	13.7937	0.00020402	0.00525589
c94223_g2	pleiotropic drug resistance 1-like	5.54435	13.7917	0.000204239	0.00525589
c77931_g3	probable aspartyl aminopeptidase isoform X1	5.35051	13.7829	0.000205197	0.0052727
c81058_g1	GDSL esterase lipase At5g62930	4.24561	13.7717	0.000206424	0.00529407
c81951_g8	zinc finger 5-like///zinc finger 7-like///unknown///---NA---	1.29218	13.7697	0.000206639	0.00529407
c77544_g1	hypothetical protein SOVF_207080	4.74746	13.7622	0.000207474	0.00530758
c91118_g2	nicotinamide mononucleotide adenylyltransferase-like isoform X1///nicotinamide nicotinic acid mononucleotide adenylyltransferase isoform X1///nicotinamide mononucleotide adenylyltransferase isoform X1	1.61573	13.7523	0.000208565	0.00532763
c70139_g1	lipoxygenase homology domain-containing 1-like	4.6632	13.7461	0.000209252	0.00533732
c91857_g4	transmembrane 64///transmembrane 41 homolog	3.72996	13.7034	0.000214071	0.00545219
c85986_g4	G-type lectin S-receptor-like serine threonine- kinase At1g11330	1.37545	13.6903	0.000215564	0.00548216
c88520_g3	nuclear matrix constituent 1	4.77176	13.6798	0.000216774	0.00550485
c82419_g1	calmodulin-binding 60-C///hypothetical protein SOVF_117600 isoform B///PREDICTED: uncharacterized protein LOC104909117 isoform X2///hypothetical protein SOVF_117600 isoform C	5.45943	13.6421	0.000221168	0.00560822
c89138_g1	callose synthase 5	-0.139632	13.6364	0.00022184	0.00561448
c90023_g4	interactor of constitutive active ROPs chloroplastic isoform X1	5.52756	13.6345	0.000222064	0.00561448
c78555_g1	core histone H2A H2B H3 H4	1.02914	13.6287	0.000222751	0.00562365
c94112_g1	sugar transporter ERD6-like 16///sugar transporter ERD6-like 16 isoform X1	4.8267	13.622	0.000223546	0.0056355
c88460_g1	Pentatricopeptide repeat (PPR) superfamily isoform 2	4.58496	13.6084	0.000225177	0.00566838
c82904_g1	28S ribosomal mitochondrial	5.23544	13.593	0.000227031	0.00570621
c83207_g2	Serine protease 45///PREDICTED: uncharacterized protein At5g01610	4.67285	13.588	0.000227633	0.00570621
c86892_g2	heterodimeric geranylgeranyl pyrophosphate synthase small chloroplastic	5.68116	13.5877	0.000227669	0.00570621
c77561_g1	something about silencing 10 isoform X1	6.35903	13.5833	0.000228209	0.00571148
c78758_g4	Lactoylglutathione lyase glyoxalase I family	3.58989	13.5658	0.000230347	0.00574104
c79368_g2	THO complex subunit 4A///THO complex subunit 4A-like	7.4555	13.568	0.000230076	0.00574104
c84422_g7	PRA1 family F2-like	5.30187	13.5655	0.000230384	0.00574104
c82512_g3	mannose glucose-specific lectin-like	11.1051	13.5485	0.000232482	0.00578498
c92625_g1	mediator of RNA polymerase II transcription subunit 25 isoform X2	4.30113	13.5328	0.000234426	0.00582501
c88451_g7	ccsA gene product (chloroplast)	3.79024	13.489	0.000239963	0.00595404
c76431_g2	HI0933 family flavo///PREDICTED: uncharacterized protein LOC104887411 isoform X1	4.15784	13.4811	0.000240975	0.00597059
c76086_g3	L-ascorbate oxidase-like	7.6131	13.4765	0.000241568	0.0059765
c76778_g1	CBS domain-containing chloroplastic	6.74236	13.4712	0.000242249	0.0059765
c82859_g2	polyadenylate-binding 2	7.21588	13.4733	0.000241976	0.0059765
c77973_g1	PREDICTED: uncharacterized protein LOC104236210///PREDICTED: uncharacterized protein LOC104902763	1.06092	13.4511	0.000244857	0.00601516
c80308_g3	acyl- --sterol O-acyltransferase 1-like	0.0479732	13.4562	0.000244201	0.00601516
c88242_g1	aspartic ase Asp1 isoform X2	2.80254	13.4534	0.000244569	0.00601516
c93624_g1	peptidyl-prolyl cis-trans isomerase FKBP8-like	0.717674	13.4083	0.000250513	0.00614538
c68728_g1	PREDICTED: uncharacterized protein LOC104906344///Orange isoform partial	6.00656	13.3975	0.000251964	0.0061635
c91716_g1	scarecrow 21	3.06071	13.4	0.000251618	0.0061635
c78873_g3	PREDICTED: uncharacterized protein LOC104895723	4.54465	13.371	0.000255545	0.0062423
c71914_g1	zinc finger BED domain-containing RICESLEEPER 2-like	1.39777	13.3296	0.000261253	0.00637273
c82737_g5	ribosomal S3///rpoB gene product (chloroplast)	3.39748	13.3238	0.000262056	0.00638334
c82865_g1	F-box FBD LRR-repeat At1g13570-like isoform X1	1.59786	13.3121	0.000263702	0.00641441
c82594_g9	P-loop containing nucleoside triphosphate hydrolases superfamily isoform 2///PREDICTED: uncharacterized protein LOC104883873 isoform X2///Uridine-cytidine kinase C	5.52005	13.2912	0.000266649	0.00644984
c84185_g1	universal stress	5.78447	13.2921	0.000266525	0.00644984
c84227_g3	ACCUMULATION AND REPLICATION OF CHLOROPLASTS 3	4.74384	13.296	0.00026597	0.00644984
c89094_g1	psbP domain-containing chloroplastic	3.32412	13.2967	0.000265874	0.00644984
c72654_g10	acidic mammalian chitinase-like	1.17765	13.2688	0.000269858	0.00648536
c77349_g8	wall-associated receptor kinase 2-like///wall-associated receptor kinase-like 16	0.448595	13.2679	0.000269989	0.00648536
c78975_g2	F-box FBD LRR-repeat At1g13570-like isoform X1	0.610167	13.2699	0.000269699	0.00648536
c87375_g1	vinorine synthase-like	5.3361	13.2692	0.000269801	0.00648536
c90483_g2	ABC transporter A family member 2///ABC transporter A family member 2-like	3.50278	13.2758	0.000268855	0.00648536
c93446_g1	mediator of RNA polymerase II transcription subunit 6	6.01395	13.2391	0.000274171	0.00657668
c73078_g3	PREDICTED: uncharacterized protein LOC104900182	4.07405	13.2227	0.000276573	0.00661598
c81667_g1	transmembrane 45B-like	3.0994	13.2253	0.000276194	0.00661598
c94531_g2	lysine-specific demethylase JMJ25-like	5.4183	13.2085	0.000278687	0.00665735
c79222_g1	PREDICTED: titin-like///---NA---	3.38515	13.1856	0.000282102	0.00672964
c85505_g1	serine threonine- kinase HT1///serine threonine- kinase HT1-like///Serine threonine- kinase HT1	6.79718	13.1736	0.00028392	0.0067637
c83384_g3	hypothetical protein SOVF_174950///PREDICTED: uncharacterized protein LOC104887958///PREDICTED: uncharacterized protein LOC105647321	2.41431	13.1435	0.000288515	0.00684533
c88612_g1	alpha,alpha-trehalose-phosphate synthase [UDP-forming] 1///alpha,alpha-trehalose-phosphate synthase [UDP-forming] 1-like	6.05315	13.1478	0.000287859	0.00684533
c88811_g1	internal alternative NAD(P)H-ubiquinone oxidoreductase mitochondrial-like///internal alternative NAD(P)H-ubiquinone oxidoreductase mitochondrial///NAD(P)H dehydrogenase B2	6.00745	13.1434	0.000288532	0.00684533
c92273_g3	PREDICTED: uncharacterized protein LOC104884717///PREDICTED: uncharacterized protein LOC104897695	0.0391089	13.1243	0.000291492	0.00689955
c93703_g2	probable phosphatase 2C 52	4.73446	13.1235	0.000291614	0.00689955
c92057_g2	1-phosphatidylinositol-3-phosphate 5-kinase FAB1C	6.98542	13.1164	0.000292722	0.00691631
c80305_g1	probable transporter mch1///major facilitator	4.53899	13.1115	0.000293482	0.00692482
c57624_g2	UDP-glucosyltransferase family///7-deoxyloganetin glucosyltransferase-like	3.41731	13.0984	0.000295541	0.00696392
c79347_g1	LOB domain-containing 41	5.88371	13.0732	0.000299551	0.0070488
c87938_g1	---NA---	6.17484	13.0617	0.000301398	0.00708264
c91222_g7	copia-type poly	0.171849	13.0572	0.000302117	0.00708992
c90269_g2	probable beta-D-xylosidase 7	6.24946	13.0412	0.00030472	0.00714134
c86754_g1	PREDICTED: uncharacterized protein LOC104902270 isoform X2///PREDICTED: uncharacterized protein LOC104902270 isoform X1	5.19163	13.02	0.000308185	0.00721278
c94918_g2	calmodulin 3	0.0251532	13.012	0.000309501	0.00723381
c94730_g1	AP2-like ethylene-responsive transcription factor AIL6///uncharacterized mitochondrial g00810-like	3.05243	12.9971	0.000311974	0.00728177
c79286_g1	probable polyamine oxidase 2	1.50598	12.9455	0.000320697	0.00746526
c92988_g1	acylamino-acid-releasing enzyme-like///acylamino-acid-releasing enzyme isoform X2	5.2138	12.9469	0.000320452	0.00746526
c77737_g3	polyamine oxidase 1///Polyamine oxidase 1	1.65206	12.9351	0.000322485	0.00749681
c87779_g2	RING-H2 finger ATL60-like	1.12339	12.932	0.000323021	0.00749919
c72853_g1	dehydration-responsive element-binding 1F-like	1.87159	12.8814	0.000331857	0.00769401
c80637_g1	hypothetical protein SOVF_023630///PREDICTED: uncharacterized protein LOC104897377	5.43819	12.8788	0.000332322	0.00769451
c83914_g2	tropinone reductase homolog At1g07440-like	3.07106	12.8548	0.000336616	0.00778351
c79980_g5	HSP20-like chaperone	1.28733	12.8315	0.00034083	0.00787045
c72246_g1	PREDICTED: uncharacterized protein LOC104901296	1.0482	12.8159	0.000343692	0.00792597
c77475_g1	cytochrome P450 704C1-like	0.391374	12.7575	0.000354581	0.00816072
c94182_g9	serine threonine- phosphatase 6 regulatory ankyrin repeat subunit B-like///ankyrin-1-like isoform X1///serine threonine- phosphatase 6 regulatory ankyrin repeat subunit B-like isoform X2	5.08436	12.7563	0.000354814	0.00816072
c83422_g1	probable flavin-containing monooxygenase 1	1.48733	12.7512	0.000355775	0.00817198
c88002_g2	---NA---	3.35716	12.7346	0.000358959	0.00821243
c89900_g3	allene oxide chloroplastic-like	5.0023	12.7379	0.000358311	0.00821243
c92391_g3	BTB POZ domain-containing At3g49900	6.23325	12.7369	0.000358503	0.00821243
c90648_g3	ROOT UV-B SENSITIVE 4///root UVB sensitive 4 isoform X2	3.40205	12.709	0.000363905	0.0083146
c68986_g1	Amidohydrolase family expressed isoform 1	5.0877	12.7011	0.000365444	0.00833877
c70282_g4	fatty-acid-binding 2	4.2198	12.6911	0.000367409	0.00837257
c77482_g2	mitochondrial import inner membrane translocase subunit TIM17-2-like	1.3649	12.667	0.000372173	0.00846999
c84391_g1	---NA---	2.8433	12.6604	0.000373476	0.0084885
c80993_g3	chloroplast-targeted copper///copper chaperone	2.05546	12.6425	0.000377075	0.00855905
c91104_g3	PREDICTED: uncharacterized protein LOC102617756	5.5169	12.6138	0.000382904	0.00867999
c73420_g1	Hop-interacting THI032///alanine glyoxylate aminotransferase	3.36527	12.6059	0.000384531	0.00870548
c83365_g2	PREDICTED: uncharacterized protein LOC104883796///LINE-1 retrotransposable element ORF2///PREDICTED: uncharacterized protein LOC104890388///PREDICTED: uncharacterized protein LOC104105592	0.303568	12.5788	0.00039014	0.00880943
c88152_g1	probable long-chain-alcohol O-fatty-acyltransferase 5	0.497472	12.5798	0.000389938	0.00880943
c80728_g1	probable leucine-rich repeat receptor kinase At5g49770	5.3689	12.5486	0.000396513	0.00894167
c91927_g1	ndhH gene product (chloroplast)///orf25 gene product (mitochondrion)///hypothetical chloroplast RF1 (chloroplast)	5.44871	12.5346	0.000399486	0.00899702
c63262_g1	PREDICTED: glutaredoxin-C6-like///probable WRKY transcription factor 17	7.05646	12.5199	0.000402638	0.00905621
c79018_g4	bZIP transcription factor family	5.24045	12.4908	0.000408967	0.00918665
c80688_g1	BURP domain-containing 3-like	4.53209	12.477	0.000411986	0.00924246
c93156_g1	invertase inhibitor///ATP synthase subunit mitochondrial-like	6.73082	12.4282	0.000422893	0.00947488
c82916_g3	pathogenesis-related genes transcriptional activator PTI6-like	3.62349	12.389	0.000431869	0.00964469
c84979_g2	---NA---	4.49535	12.3894	0.000431768	0.00964469
c92833_g1	1-aminocyclopropane-1-carboxylate oxidase-like	3.29519	12.3878	0.000432143	0.00964469
c90034_g1	Basic helix-loop-helix DNA-binding superfamily isoform 1///ATP binding	5.07678	12.384	0.000433039	0.00965225
c90346_g2	PREDICTED: uncharacterized protein LOC104897426	2.61474	12.3734	0.000435504	0.00969473
c90453_g1	UDP-glycosyltransferase 74F2-like	3.0337	12.36	0.00043862	0.00975155
c85530_g1	tubulin alpha-3 chain-like///tubulin alpha-3 chain	5.81824	12.3395	0.000443484	0.00984706
c90310_g1	L-ascorbate oxidase homolog	1.2034	12.3364	0.0004442	0.00985032
c69511_g3	probable 2-oxoglutarate Fe(II)-dependent dioxygenase	1.30174	12.3089	0.000450809	0.0099841
c84438_g2	ubiquitin carboxyl-terminal hydrolase 21///ubiquitin carboxyl-terminal hydrolase 20-like	3.56393	12.3026	0.000452338	0.0100052
c76126_g3	Ribosomal L12 ATP-dependent Clp protease adaptor family isoform 2///citrate mitochondrial-like///citrate synthase mitochondrial	4.7433	12.2996	0.000453065	0.0100082
c90556_g1	protease Do-like chloroplastic	3.96487	12.2972	0.000453633	0.0100082
c88282_g1	probable aldo-keto reductase 2 isoform X1///probable aldo-keto reductase 4	4.38859	12.2922	0.000454847	0.0100223
c80241_g1	mitogen-activated kinase kinase kinase YODA-like	3.45782	12.2783	0.00045826	0.0100843
c83098_g8	60S ribosomal L11	10.3195	12.276	0.000458826	0.0100843
c93953_g1	BAG family molecular chaperone regulator 6	2.9572	12.2567	0.000463588	0.010176
c91594_g2	gag-pol identical	0.910842	12.2401	0.000467725	0.0102538
c81687_g4	notum homolog isoform X1	0.23125	12.2358	0.000468806	0.0102645
c69079_g1	40S ribosomal S17	8.7187	12.2321	0.000469748	0.0102722
c92209_g2	midasin isoform X1	3.99891	12.2264	0.00047118	0.0102905
c90372_g4	F-box SKIP23-like	1.11713	12.2211	0.000472524	0.0103069
c71687_g4	retroelement pol poly///retroelement pol poly -like	0.0646016	12.2089	0.000475612	0.0103612
c89067_g2	Peptidyl-prolyl cis-trans isomerase FKBP65///70 kDa peptidyl-prolyl isomerase-like	4.82899	12.2016	0.000477481	0.0103888
c80999_g1	kDa class I heat shock -like	3.88646	12.1909	0.000480244	0.0104358
c76352_g4	scarecrow 30	0.51936	12.1801	0.00048303	0.0104832
c92571_g1	2-alkenal reductase (NADP(+)-dependent)	3.97952	12.1632	0.000487412	0.0105651
c78696_g1	---NA---///endoplasmatic reticulum retrieval Rer1B///cox1 gene product (mitochondrion)///cytochrome oxidase subunit I///RER1A protein	5.41273	12.1453	0.000492126	0.0106539
c79223_g4	ABC transporter B family member chloroplastic///ABC transporter B family member 26	4.82486	12.1391	0.000493744	0.0106756
c84760_g1	heptahelical transmembrane 1-like	4.79183	12.1279	0.000496739	0.010727
c73840_g1	F-box LRR-repeat At4g14103-like isoform X1	2.22147	12.121	0.000498575	0.0107398
c81099_g2	mediator of RNA polymerase II transcription subunit 2-like	3.04423	12.123	0.000498032	0.0107398
c78908_g1	---NA---	5.64762	12.0944	0.000505737	0.0108806
c84407_g2	inner membrane PPF- chloroplastic///Inner membrane PPF- chloroplastic	5.79694	12.0819	0.000509137	0.0109401
c91308_g1	PREDICTED: uncharacterized protein LOC104895214///PREDICTED: uncharacterized protein LOC104895217///meiosis chromosome segregation family	5.66496	12.0628	0.000514387	0.0110392
c77954_g1	histone H1-like	8.25842	12.0506	0.000517761	0.0110869
c92443_g2	endo-1,4-beta-glucanase///endoglucanase 25-like	7.57403	12.0501	0.000517888	0.0110869
c78991_g1	PREDICTED: uncharacterized protein LOC104890176	6.61961	12.0387	0.000521067	0.0111412
c89041_g1	PLASMODESMATA CALLOSE-BINDING PROTEIN 5-like isoform X1	4.68909	12.0302	0.000523443	0.0111782
c95262_g1	hypothetical protein	1.33625	12.0234	0.00052537	0.0112055
c85570_g7	uncharacterized LOC102580903	3.57563	12.0174	0.000527067	0.0112279
c84310_g1	germin subfamily 1 member 1	0.602219	12.0086	0.000529568	0.0112673
c58217_g1	hypothetical protein ARALYDRAFT_480901///Sugar phosphate exchanger	1.2763	11.9796	0.000537871	0.0114299
c77593_g5	myb-related 308-like///AC069473_8 gypsy Ty-3 retroelement poly 69905-74404	3.4955	11.9569	0.000544448	0.0115555
c84626_g1	RNA polymerase II C-terminal domain phosphatase-like 4 isoform X2	0.437314	11.953	0.000545581	0.0115613
c85106_g1	ribonucleoside-diphosphate reductase large subunit	9.69636	11.9492	0.000546722	0.0115613
c86709_g2	Ca2+-binding 1	3.03418	11.9498	0.00054653	0.0115613
c91085_g1	cytochrome P450 94A1-like	2.84938	11.9378	0.000550069	0.0116179
c73299_g2	14-3-3 A	6.31981	11.9291	0.000552639	0.0116579
c79497_g7	ycf1 (chloroplast)///hypothetical chloroplast RF19 (chloroplast) (chloroplast)///hypothetical chloroplast RF1 (chloroplast)	6.06825	11.9083	0.000558848	0.011746
c81155_g1	hypothetical protein SOVF_170270	3.8601	11.9119	0.000557768	0.011746
c91421_g2	leucine-rich repeat receptor-like serine threonine- kinase BAM1	8.39196	11.91	0.000558346	0.011746
c89069_g2	NAC domain-containing 72///NAC domain-containing 72-like	2.94617	11.9051	0.000559794	0.0117516
c76107_g15	disease resistance RGA1	0.425837	11.8943	0.000563065	0.0118036
c78493_g5	dehydration-responsive element-binding 3-like	0.444516	11.8924	0.000563635	0.0118036
c80430_g2	short-chain dehydrogenase TIC chloroplastic	6.83339	11.8751	0.000568904	0.0118996
c92387_g2	dehydrin 1	6.01689	11.8719	0.000569883	0.0119057
c82080_g1	vesicle-associated 2-2	4.77278	11.864	0.00057231	0.011937
c92166_g2	60S ribosomal L24-2	8.69963	11.8625	0.000572759	0.011937
c93897_g4	cyclin delta-1 family	3.24512	11.8582	0.000574067	0.0119498
c87929_g5	Kinase interacting family isoform 1	6.88296	11.8498	0.000576683	0.0119899
c74455_g1	flavonol synthase flavanone 3-hydroxylase-like	3.2294	11.8452	0.000578096	0.0120049
c74392_g2	ATPase plasma membrane-type-like///plasma membrane atpase 1///plasma membrane H+ ATPase	0.533816	11.8355	0.000581136	0.0120535
c74916_g1	monoacylglycerol lipase ABHD6///monoacylglycerol lipase ABHD6 isoform X2///monoacylglycerol lipase ABHD6 isoform X1	3.60137	11.8294	0.000583038	0.0120661
c79860_g1	PREDICTED: uncharacterized protein LOC104908062	3.96375	11.8268	0.000583832	0.0120661
c83410_g2	60S acidic ribosomal P1-like	9.18114	11.829	0.000583148	0.0120661
c88162_g2	pre-mRNA-splicing factor SYF1	3.8522	11.8223	0.000585271	0.0120742
c89359_g1	ABC transporter G family member 14	3.0076	11.8211	0.000585617	0.0120742
c95090_g2	F-box LRR-repeat At3g18150	-0.125494	11.8157	0.000587319	0.0120949
c74750_g2	Cyclin p3,2	2.01536	11.8034	0.000591218	0.0121607
c81580_g1	thaumatin 1b///thaumatin 1	1.02703	11.798	0.000592933	0.0121815
c70896_g1	ATP-dependent zinc metalloprotease FTSH chloroplastic///ATP-dependent zinc metalloprotease FTSH chloroplastic-like	3.0795	11.7929	0.000594563	0.0122005
c81097_g1	probable calcium-binding CML13	7.1516	11.79	0.00059549	0.0122051
c75247_g1	40S ribosomal S26-like	9.00345	11.783	0.000597729	0.0122365
c72092_g1	ras-related RABD1	7.9695	11.7656	0.000603348	0.0123079
c81001_g3	50S ribosomal chloroplastic	5.67498	11.7674	0.00060276	0.0123079
c95068_g1	acidic mammalian chitinase-like	2.32424	11.7684	0.000602438	0.0123079
c87627_g8	dnaJ homolog subfamily B member 3	5.34906	11.7597	0.000605277	0.0123327
c81485_g5	ethylene-responsive transcription factor 4-like	7.00846	11.7539	0.000607156	0.0123564
c84652_g1	omega-hydroxypalmitate O-feruloyl transferase///omega-hydroxypalmitate O-feruloyl transferase-like	3.36384	11.7509	0.000608138	0.0123619
c76774_g4	---NA---	2.38463	11.7425	0.000610878	0.012403
c84053_g3	uncharacterized N-acetyltransferase ycf52	2.99345	11.7321	0.000614314	0.0124582
c71547_g1	DNA ligase 1 isoform X1	3.56365	11.7151	0.000619952	0.0125357
c87832_g1	valine--tRNA mitochondrial isoform X1///valine--tRNA mitochondrial isoform X4	6.3177	11.714	0.000620306	0.0125357
c87952_g1	Rpp4 candidate R3	2.71787	11.7144	0.000620195	0.0125357
c86184_g4	MLP 43	2.39785	11.6787	0.000632188	0.0127609
c81621_g4	ras-related RABA5d-like///ras-related RABA5e///ras-related RABA5c	5.17026	11.6704	0.000635023	0.0128032
c75645_g1	chloroplastic isoform X2	6.16878	11.6559	0.00064	0.0128886
c94733_g1	transcription factor MYC2-like	9.39022	11.6411	0.000645096	0.0129761
c84596_g1	subtilisin-like protease	8.07184	11.6264	0.000650212	0.0130638
c81893_g1	Soluble inorganic pyrophosphatase///soluble inorganic pyrophosphatase	2.84803	11.6187	0.000652923	0.0131031
c90871_g1	hypothetical protein SOVF_105050	6.7508	11.6031	0.00065842	0.0131841
c94276_g2	chaperone mitochondrial	6.44558	11.6029	0.000658483	0.0131841
c91351_g3	probable mediator of RNA polymerase II transcription subunit 37c///heat shock cognate 70 kDa///heat shock cognate 70 kDa -like	1.53641	11.5963	0.00066082	0.0132156
c36169_g1	homeobox 6-like	3.31406	11.5828	0.000665652	0.0132969
c81480_g1	potassium channel AKT1-like///potassium channel AKT1 isoform X1	2.46179	11.577	0.000667722	0.0133076
c93253_g2	Gamma-irradiation and mitomycin c induced isoform 5///Gamma-irradiation and mitomycin c induced isoform 1///PREDICTED: uncharacterized protein LOC104888575	4.71941	11.5774	0.000667568	0.0133076
c65382_g1	beta-amyrin 28-oxidase-like	1.56126	11.5675	0.000671148	0.0133605
c94382_g1	serine threonine- phosphatase 6 regulatory ankyrin repeat subunit A-like isoform X2	5.26203	11.5651	0.000672023	0.0133625
c78847_g2	phosphatidylinositol 3- and 4-kinase family	3.04707	11.5512	0.000677039	0.0134468
c88174_g1	F-box At3g07870-like	4.24527	11.5413	0.000680663	0.0134725
c89292_g2	probable L-type lectin-domain containing receptor kinase	2.72776	11.5432	0.000679969	0.0134725
c92859_g1	D-xylose-proton symporter-like chloroplastic	6.12871	11.5441	0.000679644	0.0134725
c88899_g4	FBD-associated F-box At5g60610-like isoform X1///F-box LRR-repeat At3g59190-like///F-box LRR-repeat	2.36569	11.5384	0.000681741	0.0134784
c72694_g2	zinc finger homeobox 4-like///VQ motif-containing family	4.40958	11.5278	0.000685634	0.0135399
c82161_g2	probable pectate lyase 5	3.04948	11.5127	0.000691222	0.0136347
c93233_g1	hypothetical protein SOVF_164020///Magnesium transporter -like family	5.27413	11.5021	0.000695171	0.013697
c88014_g1	ninja-family mc410	7.68556	11.4972	0.000697025	0.0137179
c70385_g1	scarecrow 21	2.09759	11.483	0.000702358	0.0138072
c79862_g7	beta-galactosidase 13-like	1.41194	11.4713	0.000706808	0.0138789
c84439_g9	F-box At5g50220	1.28044	11.4564	0.00071247	0.0139743
c94953_g2	phosphate transporter PHO1	6.53796	11.4452	0.000716786	0.014043
c91483_g1	probable nucleoredoxin 1	4.07111	11.4278	0.000723515	0.0141588
c80982_g1	latex abundant family	4.89766	11.4087	0.00073099	0.014289
c87876_g2	PREDICTED: uncharacterized protein LOC104906988	0.414105	11.399	0.000734839	0.014348
c91051_g2	---NA---	0.942293	11.3943	0.000736684	0.0143678
c90684_g1	potassium channel KAT1-like///potassium channel KAT3-like isoform X1	4.89062	11.3795	0.000742589	0.0144667
c94486_g1	4-coumarate-- ligase-like 5	6.27306	11.36	0.000750425	0.0146029
c82375_g1	F-box CPR30-like	2.77933	11.3552	0.000752352	0.014624
c83704_g6	---NA---	1.49884	11.3503	0.000754355	0.0146465
c91342_g7	F-box LRR-repeat 23	3.84653	11.3454	0.000756342	0.0146686
c87609_g5	probable serine threonine- kinase DDB_G0282963	0.805452	11.3414	0.000757975	0.0146839
c92025_g7	aldehyde dehydrogenase family 2 member mitochondrial-like	7.25079	11.3392	0.000758884	0.014685
c88357_g1	probable beta-1,3-galactosyltransferase 2	3.85039	11.3251	0.000764662	0.0147803
c60644_g1	21 kDa	7.61939	11.309	0.000771331	0.0148926
c90271_g1	bis(5 -adenosyl)-triphosphatase	5.98549	11.3061	0.00077253	0.0148992
c87934_g3	IQ-DOMAIN 14	3.67778	11.291	0.00077882	0.0150038
c75217_g1	GDSL-like lipase acylhydrolase///GDSL esterase lipase At3g26430-like	1.34016	11.2866	0.000780695	0.0150232
c70372_g1	serine acetyltransferase 5	4.13805	11.2803	0.00078335	0.0150575
c76542_g1	SULFUR DEFICIENCY-INDUCED 1	2.09158	11.2772	0.000784639	0.0150656
c74751_g1	retrovirus-related Pol poly from transposon TNT 1-94	0.990032	11.2666	0.000789141	0.0151353
c72776_g7	receptor kinase At4g00960	0.760207	11.2236	0.000807622	0.015471
c90630_g2	zeaxanthin chloroplastic-like	3.66402	11.2218	0.000808433	0.015471
c83847_g1	---NA---	2.98088	11.217	0.000810504	0.0154935
c93212_g2	sterol-4-alpha-carboxylate 3- decarboxylating	2.51162	11.2025	0.000816886	0.0155983
c93775_g2	60 kDa jasmonate-induced -like///notum homolog isoform X1	5.09291	11.1943	0.000820505	0.0156501
c78116_g5	mitotic apparatus p62	3.90697	11.1917	0.000821645	0.0156546
c68571_g1	chloroplastic	4.20563	11.1839	0.000825083	0.0157029
c90560_g3	anthocyanidin 3-O-glucoside 2 -O-glucosyltransferase-like	1.82762	11.1684	0.000832005	0.0158172
c28026_g1	probable carboxylesterase 5 isoform X1	1.83576	11.1488	0.000840852	0.0159679
c72234_g1	kDa class II heat shock -like	7.23279	11.1363	0.00084656	0.0160411
c85923_g2	DNA topoisomerase 6 subunit B///DNA topoisomerase 6 subunit B isoform X1	6.71926	11.1383	0.000845641	0.0160411
c80007_g2	hypothetical protein SOVF_087620	6.72917	11.1304	0.000849236	0.0160742
c88539_g5	alkaline neutral invertase CINV2-like	3.20811	11.1174	0.000855238	0.0161702
c79906_g1	two-pore potassium channel 5-like///calcium-activated outward-rectifying potassium channel chloroplastic	4.73618	11.1135	0.000857027	0.0161863
c85776_g1	histone-lysine N- H3 lysine-9 specific SUVH4	5.9299	11.11	0.000858614	0.0161986
c91359_g2	Exosome component 10///Exonuclease 3 -5 domain-containing 2	5.71466	11.0747	0.000875124	0.0164921
c80576_g1	ATP-citrate synthase beta chain 2	2.38178	11.022	0.000900383	0.0169497
c86555_g4	zinc finger CCCH domain-containing 66-like	3.81487	11.0175	0.000902565	0.0169723
c94444_g3	probable galacturonosyltransferase 14 isoform X2///probable galacturonosyltransferase 13 isoform X1///probable galacturonosyltransferase 14 isoform X1	6.06225	11.009	0.00090672	0.017032
c75935_g2	map3k delta-1	2.92272	10.994	0.00091406	0.0171512
c91561_g10	DNA polymerase	2.5384	10.9862	0.00091795	0.0172056
c71924_g3	ROOT HAIR DEFECTIVE 3-like	1.67806	10.9754	0.000923307	0.0172873
c94514_g3	PREDICTED: uncharacterized protein LOC104889316	0.220622	10.9709	0.000925551	0.0173106
c93378_g5	TRIGALACTOSYLDIACYLGLYCEROL chloroplastic	2.96921	10.9675	0.000927229	0.0173233
c93746_g2	Leucine-rich repeat kinase family isoform 1	8.03616	10.9655	0.00092826	0.0173239
c81379_g2	GDSL esterase lipase At1g09390///serine threonine- kinase At3g51990///GDSL esterase lipase At1g09390-like	5.05434	10.9448	0.000938691	0.0174997
c91548_g1	heavy-metal-associated domain-containing family///heavy metal transport detoxification domain-containing	5.89387	10.9352	0.000943549	0.0175524
c92228_g2	F-box At3g25750	0.65906	10.9369	0.000942668	0.0175524
c74527_g2	D-3-phosphoglycerate dehydrogenase chloroplastic-like///D-3-phosphoglycerate dehydrogenase chloroplastic	9.60511	10.9279	0.000947291	0.0175843
c85720_g7	expansin A1	3.91973	10.9283	0.000947059	0.0175843
c85172_g5	L-type lectin-domain containing receptor kinase -like	2.96004	10.921	0.000950793	0.0176304
c92360_g1	O Chain The Dual Coenzyme Specificity Of Photosynthetic Glyceraldehyde-3- Phosphate Dehydrogenase Interpreted By The Crystal Structure Of A4 Isoform Complexed With Nad	6.80103	10.9012	0.000961027	0.0178011
c90793_g2	Tetratricopeptide repeat-like superfamily	6.48048	10.8978	0.000962806	0.017815
c93402_g2	hypothetical protein SOVF_075010///PREDICTED: uncharacterized protein LOC104903869///RNA polymerase II-associated 1	7.19869	10.8838	0.000970077	0.0179304
c90012_g1	receptor-like serine threonine- kinase At4g25390	4.89173	10.8566	0.000984437	0.0181764
c72764_g1	pirin-like plant///pirin	3.03175	10.8515	0.000987144	0.018207
c81635_g1	Myb SANT-like DNA-binding domain///PREDICTED: uncharacterized protein LOC104904075	4.65243	10.8394	0.000993655	0.0183076
c83951_g1	BAG family molecular chaperone regulator mitochondrial	3.19639	10.8364	0.000995215	0.0183168
c77240_g1	2-oxoglutarate and Fe(II)-dependent oxygenase superfamily///unknown protein	6.18247	10.8147	0.00100698	0.0185137
c81554_g5	small RNA degrading nuclease 3-like	3.71106	10.7922	0.00101926	0.0187196
c79115_g1	auxin transporter 3	3.04908	10.7901	0.00102043	0.0187212
c82962_g3	transcription factor HBI1	0.551055	10.7761	0.00102818	0.0188435
c89913_g2	PREDICTED: uncharacterized protein LOC104905415	3.37315	10.7654	0.00103413	0.0189324
c92366_g3	4-coumarate-- ligase-like 7	6.9002	10.7577	0.00103844	0.0189914
c87621_g1	myosin-2-like isoform X1///myosin-2 isoform X1///myosin-2 isoform X2///myosin-1 isoform X1	0.886895	10.7472	0.00104438	0.0190797
c80596_g1	7-deoxyloganetin glucosyltransferase-like///DNA RNA polymerases superfamily	6.08292	10.7386	0.00104924	0.0191483
c87998_g1	boron transporter 4-like	3.23122	10.7259	0.00105648	0.0192372
c90835_g3	hypothetical protein BVRB_7g164140	2.64625	10.7274	0.00105559	0.0192372
c95075_g1	wall-associated receptor kinase-like 16	2.55161	10.7242	0.00105744	0.0192372
c77334_g1	glycine-rich domain-containing 1	1.88729	10.7155	0.00106244	0.0193079
c93659_g11	N-(5 -phosphoribosyl)anthranilate isomerase chloroplastic-like	1.86644	10.7131	0.00106379	0.0193122
c81555_g4	probable mitochondrial-processing peptidase subunit beta	6.64531	10.7098	0.00106569	0.0193263
c85217_g2	Serine carboxypeptidase-like 45 isoform 1///serine carboxypeptidase-like 45	6.37251	10.6732	0.00108697	0.019617
c87473_g3	squamosa promoter-binding 2///Squamosa promoter binding -like isoform 1	5.78936	10.677	0.00108475	0.019617
c87601_g2	geraniol 8-hydroxylase-like	0.380367	10.6725	0.00108738	0.019617
c88020_g5	MIP18 family At1g68310	4.84854	10.6777	0.00108432	0.019617
c93612_g3	transporter arsB	2.87703	10.6764	0.00108513	0.019617
c88269_g2	PREDICTED: uncharacterized protein LOC104898791	1.97167	10.6608	0.0010943	0.0197212
c84982_g3	uncharacterized mitochondrial g00810-like	0.39257	10.6501	0.00110066	0.0197947
c90642_g3	PREDICTED: uncharacterized protein LOC104903615///C82A4_SOYBN ame: Full=Cytochrome P450 82A4 ame: Full=Cytochrome P450 CP9	5.07688	10.6512	0.00110001	0.0197947
c81592_g2	zinc finger ZAT12///zinc finger ZAT8-like	2.52097	10.6408	0.00110622	0.0198329
c88964_g5	probable phosphatase 2C 59 isoform X1	3.86043	10.6445	0.00110397	0.0198329
c93393_g2	Translocon at the inner envelope membrane of chloroplasts 20 isoform 1	7.02588	10.6426	0.00110511	0.0198329
c66075_g1	flavonoid 3 ,5 -methyltransferase-like	2.55706	10.6266	0.00111471	0.0199645
c82219_g2	inositol transporter 4-like	2.15525	10.6221	0.00111742	0.0199924
c86630_g2	phospholipase A1-IIdelta///phospholipase A1-IIdelta-like	5.03583	10.6016	0.00112987	0.0201735
c93002_g1	copper-transporting ATPase chloroplastic	6.52118	10.6027	0.0011292	0.0201735
c85402_g1	serine threonine- phosphatase 5 isoform X2	1.41739	10.598	0.00113213	0.0201929
c93766_g7	DPH4 homolog	0.389654	10.5953	0.00113376	0.0202013
c93917_g2	serine arginine-rich splicing factor RSZ22A	7.67696	10.5843	0.00114055	0.0203013
c84144_g1	60S ribosomal L6-like	10.0053	10.5736	0.00114713	0.0203975
c78034_g6	OTU domain-containing 6B-like	4.83533	10.5705	0.00114905	0.0204106
c78320_g3	B3 domain-containing At5g66980	2.99222	10.5652	0.00115239	0.0204491
c92165_g1	peroxidase 5-like	8.61149	10.5484	0.00116287	0.0206138
c85905_g1	mediator of RNA polymerase II transcription subunit 36a///probable mediator of RNA polymerase II transcription subunit 36b	9.20552	10.5142	0.00118464	0.0209783
c89363_g4	disulfide isomerase (PDI)	4.7691	10.5079	0.00118867	0.0210282
c71812_g2	histidine kinase 2	3.04188	10.4925	0.00119863	0.0211269
c86888_g1	isoform 1	3.40849	10.4917	0.00119913	0.0211269
c91555_g3	hydroquinone glucosyltransferase-like	2.32009	10.4971	0.0011956	0.0211269
c94003_g1	peptide-N(4)-(N-acetyl-beta-glucosaminyl)asparagine amidase///peptide-N(4)-(N-acetyl-beta-glucosaminyl)asparagine amidase-like	6.16338	10.4928	0.00119839	0.0211269
c73438_g1	macrophage migration inhibitory factor homolog	4.31243	10.478	0.00120804	0.0212622
c83137_g1	ADP,ATP carrier mitochondrial-like///ADP,ATP carrier mitochondrial///ADP ATP carrier 3 isoform 1	0.92736	10.4721	0.00121188	0.0213082
c79189_g1	hypothetical protein BVRB_7g169070	6.40736	10.4665	0.00121557	0.0213454
c83121_g1	uncharacterized serine-rich	3.16502	10.4652	0.00121646	0.0213454
c66095_g1	cyclic nucleotide-gated ion channel 15	1.69195	10.4553	0.00122297	0.0214162
c81575_g2	PREDICTED: uncharacterized protein LOC104884430///PREDICTED: uncharacterized protein LOC104905159	0.479508	10.4555	0.00122287	0.0214162
c91440_g1	GDSL esterase lipase At5g08460-like	4.10789	10.453	0.00122447	0.0214209
c78173_g11	thioredoxin CXXS1	1.0813	10.4376	0.00123473	0.0215785
c92628_g4	agamous-like MADS-box AGL15 isoform X1	2.67683	10.4333	0.00123764	0.0216076
c84406_g3	Cyclin-D3-1	5.34314	10.4273	0.00124167	0.0216515
c93712_g4	gag-pol polymerase///retrotransposon Ty1-copia subclass	-0.0795514	10.4258	0.00124266	0.0216515
c85516_g2	myelin transcription factor 1	4.28885	10.4176	0.00124823	0.0217268
c75127_g1	PREDICTED: uncharacterized protein LOC104887287///conserved hypothetical protein///hypothetical protein L484_020980	3.61901	10.4061	0.00125597	0.0218395
c91809_g5	MATH domain and coiled-coil domain-containing At3g58340-like isoform X2///probable inactive serine threonine- kinase fnkC	0.453917	10.4004	0.00125989	0.0218858
c89589_g1	probable aldo-keto reductase 2	3.33127	10.3953	0.00126334	0.0219237
c87114_g4	codeine O-demethylase-like///SRG1-like	6.16026	10.3785	0.00127489	0.0221019
c75380_g6	pre-mRNA-processing-splicing factor 8-like	-0.179849	10.3712	0.00127995	0.0221674
c93053_g2	DNA (cytosine-5)-methyltransferase 1B-like	8.44875	10.3687	0.00128172	0.0221759
c91440_g3	anthocyanin 5-aromatic acyltransferase-like	3.81221	10.365	0.00128424	0.0221974
c77431_g1	eukaryotic translation initiation factor 3 subunit J-like	5.57078	10.3473	0.00129666	0.0223897
c75267_g8	pumilio homolog 2-like isoform X1///pumilio homolog 1-like	5.07036	10.343	0.0012997	0.0224197
c75402_g2	PREDICTED: uncharacterized protein LOC104901083	1.12745	10.3362	0.00130449	0.0224365
c76818_g2	hypothetical protein POPTR_0996s00200g, partial	2.05351	10.3361	0.00130455	0.0224365
c90037_g1	probable mitochondrial chaperone BCS1-B isoform X1	3.20508	10.3392	0.00130238	0.0224365
c92063_g2	prolycopene chloroplastic isoform X1	4.6667	10.3285	0.00130992	0.0225065
c77966_g2	transcription factor BTF3 homolog 4-like	7.846	10.32	0.00131597	0.022521
c78134_g1	peptidyl-prolyl cis-trans isomerase Pin1	6.88314	10.3241	0.00131307	0.022521
c80327_g6	uncharacterized mitochondrial g00810-like	0.585931	10.3206	0.00131557	0.022521
c86903_g1	nucleolar GTP-binding 2	0.663854	10.3217	0.00131473	0.022521
c68367_g1	methyltransferase DDB_G0268948	2.4131	10.2985	0.00133139	0.0227617
c86649_g7	probable serine threonine- kinase DDB_G0272282	0.0154177	10.2949	0.00133398	0.0227617
c93951_g3	BTB POZ domain-containing DOT3-like	5.15849	10.295	0.00133393	0.0227617
c75282_g1	-L-isoaspartate O-methyltransferase-like///-L-isoaspartate O-methyltransferase 1-like///-L-isoaspartate O-methyltransferase	6.2999	10.2909	0.0013369	0.0227668
c87684_g1	splicing factor 3B subunit 6	6.02458	10.2914	0.00133654	0.0227668
c83124_g3	pentatricopeptide repeat-containing At5g66520-like	3.76078	10.2798	0.00134492	0.0228584
c89526_g1	random slug 5///random slug 5-like	6.37629	10.2799	0.00134485	0.0228584
c66214_g2	quinolinate chloroplastic	2.80927	10.2748	0.0013486	0.0228985
c90212_g5	hypothetical protein BVRB_4g077300///hypothetical protein CISIN_1g0136582mg	3.99249	10.271	0.0013514	0.0229235
c91222_g6	retrotransposon unclassified	0.249138	10.2665	0.00135465	0.0229561
c78193_g3	adenylate isopentenyltransferase chloroplastic-like///adenylate isopentenyltransferase chloroplastic	3.48431	10.262	0.00135799	0.0229902
c65200_g1	germin 2-1	3.15518	10.2515	0.0013657	0.0230983
c80638_g1	disease resistance RGA2-like	6.2151	10.2411	0.00137347	0.0232069
c82407_g8	clathrin coat assembly	6.25937	10.2344	0.00137847	0.0232687
c91173_g2	Defective in cullin neddylation///DCN1 2	7.27125	10.2284	0.00138298	0.0233221
c84553_g1	pectinesterase pectinesterase inhibitor 28	2.30634	10.2151	0.00139292	0.0234669
c73473_g4	flowering locus T	1.09245	10.2037	0.00140161	0.0235903
c86592_g1	12-oxophytodienoate reductase 3-like///12-oxophytodienoate reductase 3	4.96978	10.2012	0.00140353	0.0235997
c80435_g5	ethylene-responsive transcription factor ERF026-like	3.63382	10.1972	0.00140652	0.0236271
c76979_g6	poly///GPI inositol-deacylase C	0.946302	10.1846	0.00141619	0.0237665
c67968_g1	PREDICTED: uncharacterized protein LOC104887308///PREDICTED: uncharacterized protein LOC104755690	0.115201	10.1611	0.00143433	0.0240244
c90675_g6	inositol-tetrakisphosphate 1-kinase 4	7.17686	10.1616	0.00143399	0.0240244
c83305_g1	hypothetical protein SOVF_091060 isoform A///PREDICTED: uncharacterized protein LOC100266128 isoform X1	3.15765	10.1532	0.0014405	0.0241044
c91551_g4	AT-rich interactive domain-containing	7.41221	10.143	0.00144849	0.0242146
c83952_g2	Chromosomal replication initiator	2.07884	10.1369	0.00145334	0.0242723
c92481_g1	lysine ketoglutarate reductase trans-splicing	3.21342	10.1122	0.00147294	0.024576
c72866_g1	coiled-coil domain-containing R3HCC1L	4.6295	10.1022	0.0014809	0.024685
c81874_g1	ROOT HAIR DEFECTIVE 3-like	5.20241	10.099	0.00148346	0.024704
c86052_g1	DEAD-box ATP-dependent RNA helicase 57	5.32811	10.0968	0.00148529	0.0247105
c69753_g2	PREDICTED: uncharacterized protein LOC104906765	2.16838	10.0895	0.00149114	0.0247841
c84074_g3	cinnamoyl- reductase 1-like///tetraketide alpha-pyrone reductase 1-like isoform X1///cinnamyl-alcohol dehydrogenase	2.70367	10.0797	0.00149911	0.0248928
c74472_g4	PREDICTED: uncharacterized protein LOC104895214	3.931	10.065	0.00151111	0.025044
c88721_g2	23 kDa jasmonate-induced -like	7.56377	10.0661	0.00151019	0.025044
c87512_g5	hypothetical protein B456_011G294500///disease resistance At3g14460///disease resistance At4g27190-like isoform X2///PREDICTED: uncharacterized protein LOC104246580///NB-ARC domain disease resistance	3.06822	10.0576	0.00151719	0.0250727
c93671_g6	PREDICTED: uncharacterized protein LOC104813376///---NA---	1.24248	10.0599	0.00151528	0.0250727
c93679_g1	TIC chloroplastic	3.47901	10.0586	0.00151639	0.0250727
c93985_g2	hypothetical protein SOVF_070480///anthocyanidin reductase-like	4.62392	10.0542	0.00151998	0.0250948
c85099_g1	small ubiquitin-related modifier 2	3.35382	10.0476	0.00152547	0.0251615
c84895_g2	flotillin 4///Homeobox knotted-1-like 3	3.03072	10.0384	0.00153312	0.0252637
c75090_g5	#NAME?	3.90223	10.033	0.00153761	0.0253135
c93267_g2	inactive purple acid phosphatase 2	3.75529	10.0162	0.0015517	0.0255212
c82098_g3	B3 domain-containing At5g42700-like	5.15405	10.0141	0.00155346	0.025526
c89131_g4	formamidase isoform X2	5.98787	10.0117	0.00155547	0.0255347
c76912_g7	glutamate synthase	2.58628	10.0067	0.00155972	0.0255803
c61334_g2	probable histone H2A variant 3	3.94381	9.99251	0.00157178	0.0257135
c76570_g4	transcription factor bHLH35	5.4045	9.98685	0.00157662	0.0257135
c81920_g1	F-box At3g07870-like///F-box CPR30-like	3.51886	9.98861	0.00157511	0.0257135
c83112_g1	---NA---	2.10881	9.98496	0.00157824	0.0257135
c87936_g3	probable GTP diphosphokinase chloroplastic	1.94026	9.99053	0.00157348	0.0257135
c88150_g2	AC069473_8 gypsy Ty-3 retroelement poly 69905-74404///transposon Tf2-1 poly isoform X1	1.84101	9.98631	0.00157708	0.0257135
c92125_g2	glucose-6-phosphate 1-epimerase	3.77258	9.99517	0.00156951	0.0257135
c88684_g2	expansin-A13	5.11471	9.98131	0.00158137	0.0257404
c76657_g5	retroelement pol poly	1.32013	9.97406	0.00158761	0.0258177
c80591_g2	sporulation RMD1	4.38685	9.96848	0.00159243	0.025861
c92951_g1	peroxisomal (S)-2-hydroxy-acid oxidase GLO4-like	3.38204	9.96752	0.00159326	0.025861
c88770_g2	anthranilate synthase alpha subunit chloroplastic-like isoform X1///anthranilate synthase alpha subunit chloroplastic-like	5.82217	9.94319	0.00161445	0.0261804
c94804_g1	granule-bound starch synthase chloroplastic amyloplastic-like	8.01432	9.9229	0.00163235	0.0264459
c83728_g1	probable ribosome biogenesis RLP24	7.50411	9.91501	0.00163936	0.0265347
c81012_g2	F-box LRR-repeat At4g15060	3.06653	9.91145	0.00164253	0.0265612
c91294_g5	40S ribosomal S3-3	10.1035	9.90656	0.0016469	0.026607
c69753_g1	PREDICTED: uncharacterized protein LOC104906765	3.98777	9.89598	0.0016564	0.0266857
c77324_g1	---NA---	6.81337	9.89678	0.00165568	0.0266857
c88405_g1	glucan 1,3-beta-glucosidase A-like isoform X1	2.28988	9.8986	0.00165405	0.0266857
c78270_g2	F-box PP2-B12	0.959765	9.87891	0.00167184	0.0268567
c81554_g4	small RNA degrading nuclease 1///small RNA degrading nuclease 3-like///small RNA degrading nuclease 1-like	5.76714	9.88009	0.00167076	0.0268567
c86130_g5	probable ATP-dependent RNA helicase DHX35	5.07829	9.88118	0.00166978	0.0268567
c93367_g1	receptor kinase	4.86113	9.8774	0.00167321	0.0268567
c87577_g2	transcription factor TCP20	-0.0821026	9.86952	0.00168039	0.026947
c76622_g1	histone deacetylase complex subunit SAP18	3.19867	9.86445	0.00168503	0.0269963
c81186_g4	respiratory burst oxidase homolog E	0.965939	9.85548	0.00169326	0.0271032
c78662_g3	glycosyl hydrolase family 10///glycosyl hydrolase family 10 family///hypothetical protein SOVF_027930 isoform A	6.3538	9.84757	0.00170056	0.0271949
c79477_g1	DNA ligase 1///DNA ligase 1-like	3.12378	9.84093	0.00170672	0.0272681
c76262_g2	PREDICTED: uncharacterized protein LOC104895477///LIKE COV 2///G patch domain-containing 11	7.18727	9.8366	0.00171074	0.027282
c88869_g2	outer envelope pore chloroplastic-like	4.36021	9.83718	0.00171019	0.027282
c81023_g1	calcium-dependent kinase 17-like isoform X1	0.272557	9.81945	0.00172676	0.0275122
c94422_g1	F-box At5g52880 isoform X1///F-box At5g52880 isoform X2	3.11685	9.80614	0.0017393	0.0276865
c81944_g2	glucan endo-1,3-beta-D-glucosidase isoform X1///glucan endo-1,3-beta-D-glucosidase isoform X2	5.08233	9.80056	0.00174459	0.0277452
c90138_g4	ubiquitin-conjugating enzyme E2 36-like	7.97412	9.79393	0.00175089	0.0278199
c90847_g1	deoxynucleoside triphosphate triphosphohydrolase SAMHD1 homolog isoform X1///deoxynucleoside triphosphate triphosphohydrolase SAMHD1 homolog isoform X2	4.23601	9.79123	0.00175346	0.0278352
c84078_g1	basic endochitinase///endochitinase CH25	4.74544	9.78943	0.00175518	0.027837
c90085_g1	UDP-glycosyltransferase 85A2-like	2.42344	9.78456	0.00175984	0.0278853
c91830_g2	sugar carrier C-like///sugar carrier C///hexose transporter	4.11494	9.78226	0.00176203	0.0278946
c81781_g1	probable phosphatase 2C 2	0.62952	9.77716	0.00176693	0.0279466
c89329_g1	ammonium transporter 1 member 3-like///ammonium transporter 1 member 3	3.89188	9.76505	0.0017786	0.0280543
c93958_g1	DNA cross-link repair SNM1///B3 domain-containing At5g66980 isoform X1///B3 domain-containing At5g66980	3.5452	9.76707	0.00177666	0.0280543
c94675_g1	sodium calcium exchanger///hypothetical protein BVRB_4g085870	7.4181	9.76635	0.00177735	0.0280543
c83115_g1	Rossmann-fold NAD(P)-binding domain-containing	0.944238	9.7594	0.00178408	0.0281151
c84256_g1	photosystem I reaction center subunit chloroplastic	7.48031	9.75621	0.00178718	0.0281383
c93654_g2	heat shock cognate 70 kDa 2///heat shock cognate 70 kDa 2-like	5.059	9.74892	0.00179428	0.0282245
c79256_g2	DNA repair RAD51 homolog 3	3.87266	9.73387	0.00180904	0.0284308
c70363_g1	serendip2	5.57916	9.71745	0.00182526	0.0286598
c72416_g4	nudix hydrolase 9	4.74497	9.70728	0.0018354	0.0287745
c77720_g1	---NA---///PREDICTED: epsin-like	2.19156	9.70678	0.00183589	0.0287745
c92155_g1	LOW PSII ACCUMULATION chloroplastic///LOW PSII ACCUMULATION chloroplastic-like///LOW PSII ACCUMULATION chloroplastic isoform X1	7.16737	9.70412	0.00183855	0.0287901
c83440_g2	CMP-N-acetylneuraminate-beta-galactosamide-alpha-2,3-sialyltransferase 1-like	4.46471	9.69848	0.0018442	0.0288356
c95287_g2	PREDICTED: uncharacterized protein LOC105950052///ty3-gypsy retrotransposon	7.71653	9.6979	0.00184479	0.0288356
c92643_g10	phosphoribosylaminoimidazole chloroplastic-like///phosphoribosylaminoimidazole chloroplastic isoform X1///phosphoribosylaminoimidazole chloroplastic-like isoform X1	6.02909	9.66754	0.00187552	0.0292657
c93731_g1	cytochrome P450 94B3///cytochrome family subfamily polypeptide 3	3.06596	9.66739	0.00187568	0.0292657
c75391_g1	1-aminocyclopropane-1-carboxylate synthase	3.68311	9.6646	0.00187853	0.0292838
c84042_g1	GDT1 chloroplastic	4.81746	9.65858	0.00188469	0.0293534
c95321_g1	probable 3-hydroxyisobutyrate dehydrogenase-like mitochondrial	5.5363	9.65301	0.00189041	0.029416
c91580_g1	G3BP isoform X2///ras GTPase-activating -binding 2///Beta-lactamase hcpB///Tetratricopeptide repeat-like superfamily isoform 2///hypothetical protein SOVF_073060	3.58352	9.64701	0.0018966	0.0294693
c92958_g2	ran-binding 1 homolog a-like	8.55804	9.64639	0.00189724	0.0294693
c86381_g5	F-box kelch-repeat At3g23880-like	1.49764	9.64218	0.0019016	0.0295105
c87117_g1	hypothetical protein SOVF_022740///PREDICTED: uncharacterized protein C594.04c	4.99802	9.63689	0.00190708	0.0295427
c93734_g1	probable small nuclear ribonucleo G	7.29963	9.63704	0.00190692	0.0295427
c73200_g2	60S ribosomal L35	7.94674	9.63456	0.0019095	0.0295538
c71462_g2	nad2 gene product (mitochondrion)	4.14751	9.63128	0.00191291	0.0295801
c76851_g4	PREDICTED: uncharacterized protein LOC104897988///5 -AMP-activated kinase- isoform 2///5 -AMP-activated kinase- isoform 3	5.01515	9.61234	0.00193274	0.02986
c88328_g2	transcription factor GTE2-like	5.57057	9.60394	0.0019416	0.0299638
c88747_g1	nicotiana tabacum ORF	3.96671	9.6027	0.00194292	0.0299638
c93334_g2	PREDICTED: uncharacterized protein LOC104896902///PREDICTED: uncharacterized protein LOC104899006///PREDICTED: uncharacterized protein LOC104908122	1.71955	9.59731	0.00194863	0.0300252
c88573_g1	homocysteine S-methyltransferase 1	3.92415	9.58904	0.00195742	0.0301339
c85086_g1	40S ribosomal S14-2-like///40S ribosomal S14-2	9.59161	9.58624	0.00196041	0.0301531
c78662_g2	PREDICTED: uncharacterized protein LOC104897858///fatty acyl- reductase 2///endo-1,4-beta-xylanase C///hydrolyzing O-glycosyl	4.54581	9.57756	0.0019697	0.030269
c84617_g3	WD repeat-containing 44///WD repeat-containing YMR102C	3.44352	9.56764	0.00198037	0.0304061
c94736_g2	beta-galactosidase 8	7.63143	9.56247	0.00198596	0.0304648
c74687_g1	ATP-dependent zinc metalloprotease FTSH 8	3.2669	9.54091	0.00200942	0.0307975
c83142_g1	inositol polyphosphate multikinase beta-like	6.21653	9.53561	0.00201523	0.030832
c88295_g1	hypothetical protein SOVF_122570	3.34464	9.53567	0.00201517	0.030832
c75009_g3	Alpha beta-Hydrolases superfamily isoform 3	2.19636	9.52364	0.00202842	0.0310064
c90261_g1	TSL-kinase interacting 1	7.48369	9.51287	0.00204036	0.0311614
c84858_g4	ribonuclease P subunit p25	2.10639	9.49895	0.0020559	0.031371
c92676_g3	F-box family	2.76812	9.49185	0.00206386	0.0314648
c84081_g1	coatomer subunit zeta-1	5.43806	9.48716	0.00206915	0.0315177
c77756_g1	zinc finger GIS2-like isoform X1///zinc finger GIS2-like	2.79932	9.48108	0.00207602	0.0315946
c87200_g1	dehydration-responsive RD22	4.34502	9.47244	0.00208581	0.0317157
c78017_g3	pterin-4-alpha-carbinolamine dehydratase	3.81193	9.45818	0.00210209	0.0319352
c86686_g2	Inorganic carbon transport - isoform 1	3.36012	9.44471	0.00211759	0.0321144
c94628_g1	squamosa promoter-binding	6.46668	9.44592	0.00211619	0.0321144
c74822_g2	Zinc ion binding,DNA isoform 2	4.8257	9.44218	0.00212051	0.0321305
c91388_g3	probable calcium-binding CML36	6.33586	9.43857	0.00212469	0.0321657
c90167_g1	Adenosine kinase 2///adenosine kinase 2	9.51847	9.43106	0.0021334	0.0322694
c78621_g3	ABC transporter G family member 7 isoform X1///ABC transporter G family member 7 isoform X2///ABC transporter G family member 7	5.97496	9.42858	0.0021363	0.0322849
c83526_g2	calcium-binding CML42	8.35968	9.42314	0.00214264	0.0323526
c94127_g2	NADH dehydrogenase subunit 7///nad7 gene product (mitochondrion)	5.54946	9.41603	0.00215097	0.03245
c82347_g6	formin 5	6.63308	9.41308	0.00215443	0.0324534
c88942_g7	indole-3-pyruvate monooxygenase YUCCA6-like	1.25757	9.41105	0.00215681	0.0324534
c90466_g5	ras-related Rab11D	6.59989	9.41108	0.00215678	0.0324534
c80942_g5	cox2 gene product (mitochondrion)	4.14387	9.40744	0.00216106	0.0324891
c94267_g2	subtilisin-like protease///subtilisin precursor family///CO(2)-response secreted protease///CO(2)-response secreted protease-like	4.51055	9.39991	0.00216996	0.0325946
c94433_g2	mat-r gene product (mitochondrion)	3.30293	9.39694	0.00217348	0.0326191
c70322_g1	glucan endo-1,3-beta-glucosidase-like	1.86353	9.38678	0.00218556	0.032772
c81382_g3	receptor-like cytosolic serine threonine- kinase RBK1	3.55442	9.38189	0.00219139	0.0328149
c87825_g2	NRT1 PTR FAMILY///transmembrane 45B	4.67122	9.38121	0.00219221	0.0328149
c87973_g1	E3 ubiquitin- ligase CCNB1IP1 homolog isoform X1	2.4676	9.35582	0.00222278	0.0332438
c87975_g1	indole-3-acetic acid-amido synthetase	5.95786	9.35157	0.00222794	0.0332923
c78785_g6	hypothetical protein SOVF_152990	5.87178	9.34756	0.00223282	0.0333172
c85343_g1	cysteine-rich receptor kinase 10///cysteine-rich receptor kinase 10-like	1.5718	9.34704	0.00223346	0.0333172
c81238_g7	hypothetical protein SOVF_187440///PREDICTED: uncharacterized protein LOC104887293	1.98359	9.34387	0.00223733	0.0333462
c74344_g2	betaine aldehyde dehydrogenase chloroplastic	0.488788	9.34205	0.00223955	0.0333506
c86260_g1	50S ribosomal mitochondrial-like	5.73246	9.33681	0.00224597	0.0334174
c92370_g1	endoplasmic reticulum oxidoreductin-1-like	3.95805	9.32527	0.00226014	0.0335934
c94291_g1	H ACA ribonucleo complex subunit 4	8.80895	9.32403	0.00226167	0.0335934
c86635_g4	probable inactive poly [ADP-ribose] polymerase SRO5	1.71556	9.3122	0.00227633	0.0337531
c91723_g1	Alpha beta-Hydrolases superfamily isoform 1///Alpha beta-Hydrolases superfamily isoform 3///Alpha beta-Hydrolases superfamily isoform 4	5.59766	9.31222	0.0022763	0.0337531
c81722_g2	beta-amyrin synthase	0.213996	9.30909	0.0022802	0.0337817
c83075_g7	probable starch synthase chloroplastic amyloplastic isoform X1	5.59932	9.30202	0.00228902	0.0338833
c79567_g1	nuclear pore complex NUP35-like///nuclear pore complex NUP35	5.62471	9.29611	0.0022964	0.0339347
c91938_g1	probable beta-1,4-xylosyltransferase IRX9	3.21727	9.29612	0.0022964	0.0339347
c80268_g2	anthocyanidin 3-O-glucoside 2 -O-glucosyltransferase-like	1.59202	9.28764	0.00230705	0.0340629
c92848_g2	alpha-xylosidase 1-like	8.24343	9.28448	0.00231103	0.0340926
c89611_g2	nucleolin isoform X1///nucleolin-like isoform X2///Heterogeneous nuclear ribonucleo Q	7.10433	9.28126	0.0023151	0.0341236
c95285_g1	histidine-containing phosphotransfer 1-like	8.40058	9.2778	0.00231947	0.034159
c77044_g9	PREDICTED: uncharacterized protein LOC104892388	3.6612	9.2586	0.00234392	0.0344897
c94367_g1	retrotransposon Ty3-gypsy subclass	4.10451	9.24625	0.00235978	0.0346935
c87483_g2	pre-rRNA-processing TSR2 homolog	5.52481	9.23973	0.0023682	0.0347583
c88848_g2	hypothetical protein SOVF_078060	3.51513	9.24014	0.00236767	0.0347583
c83995_g1	probable phosphatase 2C 2 isoform X1///probable phosphatase 2C 49	5.50014	9.22973	0.00238117	0.0348895
c84972_g4	Uncharacterized AAA domain-containing///P-loop containing nucleoside triphosphate hydrolases superfamily isoform 1///P-loop containing nucleoside triphosphate hydrolases superfamily	7.51426	9.22989	0.00238096	0.0348895
c83808_g3	PREDICTED: uncharacterized protein LOC104908184///PREDICTED: uncharacterized protein LOC104892995///PREDICTED: uncharacterized protein LOC104889325	2.0403	9.22134	0.00239211	0.0350202
c91312_g2	anthocyanidin 3-O-glucosyltransferase 2-like	1.85053	9.21878	0.00239545	0.0350395
c87176_g1	DUF246 domain-containing///GDP-fucose O-fucosyltransferase	1.70355	9.2113	0.00240525	0.0351532
c79243_g7	ras-related YPT3-like///ras-related Rab11D	5.91545	9.20535	0.00241308	0.0352083
c83686_g5	G-type lectin S-receptor-like serine threonine- kinase At1g11330	2.31915	9.20666	0.00241136	0.0352083
c85607_g1	equilibrative nucleotide transporter 3-like	3.62167	9.20364	0.00241534	0.0352116
c92541_g1	external alternative NAD(P)H-ubiquinone oxidoreductase mitochondrial-like///external alternative NAD(P)H-ubiquinone oxidoreductase mitochondrial	4.94024	9.19006	0.00243333	0.0354439
c92037_g5	probable serine threonine- kinase irlA	4.30382	9.18754	0.00243669	0.035463
c95053_g1	L-type lectin-domain containing receptor kinase -like	9.90166	9.18549	0.00243942	0.0354729
c84335_g1	probable nucleoredoxin 1	1.19687	9.17539	0.00245291	0.0356393
c87337_g1	PREDICTED: uncharacterized protein LOC104899180	5.79235	9.16884	0.0024617	0.035737
c94777_g1	disease resistance RPP13 1	0.157794	9.15548	0.00247974	0.0359687
c83398_g1	LOB domain-containing 6	3.54175	9.15313	0.00248293	0.0359848
c70821_g1	inactive RESTRICTED TEV MOVEMENT 2-like	1.01824	9.14513	0.0024938	0.0360864
c75351_g3	peroxidase P7-like	3.91942	9.14491	0.0024941	0.0360864
c78543_g2	dnaJ homolog subfamily B member 4-like	3.89464	9.14117	0.00249921	0.03613
c92483_g2	ankyrin repeat-containing At5g02620-like///ankyrin repeat and kinase domain-containing 1-like	1.21249	9.13793	0.00250364	0.036164
c92720_g2	E3 ubiquitin ligase RIN2-like	6.20572	9.13626	0.00250593	0.0361668
c90154_g5	PREDICTED: uncharacterized protein LOC104902921///PREDICTED: uncharacterized protein LOC104905864///PREDICTED: uncharacterized protein LOC104899017	3.02208	9.12971	0.00251491	0.0362663
c78176_g1	SNF2 domain-containing CLASSY 3 isoform X1	1.90348	9.11997	0.00252834	0.0363993
c83144_g2	formin 4	1.50547	9.12063	0.00252743	0.0363993
c84271_g1	UDP-glycosyltransferase 85A2-like///7-deoxyloganetin glucosyltransferase-like	0.867192	9.11527	0.00253485	0.0364627
c95325_g4	disease resistance RGA3	3.0547	9.09967	0.00255656	0.0367445
c78494_g1	PREDICTED: uncharacterized protein LOC104897364	2.49422	9.09609	0.00256156	0.036776
c94672_g2	ATP-dependent 6-phosphofructokinase 3-like///6-phosphofructokinase 3-like	2.72792	9.09507	0.002563	0.036776
c82976_g8	UPF0481 At3g47200	0.978119	9.08985	0.00257032	0.0368505
c84157_g1	alpha-1,3-mannosyl-glyco 2-beta-N-acetylglucosaminyltransferase	4.71668	9.07889	0.00258578	0.0370101
c85280_g1	PREDICTED: uncharacterized protein LOC104900923	1.05804	9.07814	0.00258683	0.0370101
c94116_g1	NB-ARC domain-containing disease resistance isoform 1	1.70439	9.07741	0.00258787	0.0370101
c73082_g4	12-oxophytodienoate reductase 2-like///12-oxophytodienoate reductase 11	3.54832	9.0707	0.00259738	0.0370849
c92158_g3	AP-1 complex subunit gamma-2-like	5.05513	9.07081	0.00259723	0.0370849
c90066_g1	trichome birefringence-like 14	3.70564	9.06111	0.00261104	0.0372493
c79892_g7	plant cysteine oxidase 2-like///2-aminoethanethiol dioxygenase-like///2-aminoethanethiol dioxygenase	5.68758	9.05904	0.00261399	0.0372607
c87853_g1	diphthamide biosynthesis 2 isoform X1///diphthamide biosynthesis 2	4.70744	9.05536	0.00261926	0.0373051
c72761_g7	kinesin KCA1	2.41678	9.03787	0.00264443	0.0376113
c73376_g7	probable phosphatase 2C 80	3.83198	9.03591	0.00264727	0.0376113
c89837_g3	T-complex 1 subunit gamma	8.35437	9.03709	0.00264556	0.0376113
c88427_g1	mitogen-activated kinase kinase kinase 3-like	5.58619	9.02575	0.00266203	0.0377899
c78272_g4	probable chalcone--flavonone isomerase 3	8.20952	9.02314	0.00266583	0.0378129
c89704_g5	very-long-chain 3-oxoacyl- reductase At1g24470	2.39324	9.00866	0.00268704	0.0380825
c77407_g1	GDSL esterase lipase At1g71691-like///GDSL esterase lipase At1g71691	7.9467	9.00713	0.00268929	0.0380832
c90128_g2	hypothetical protein BVRB_1g007450	5.02464	8.99478	0.00270751	0.03831
c89560_g3	probable carboxylesterase 6	4.93891	8.98521	0.00272173	0.0384797
c70872_g1	ultraviolet-B receptor UVR8-like isoform X2///ultraviolet-B receptor UVR8-like isoform X1	3.95931	8.97917	0.00273075	0.0385443
c74880_g1	S-adenosylmethionine decarboxylase proenzyme-like	3.95503	8.98051	0.00272874	0.0385443
c84120_g2	BTB POZ domain-containing FBL11 isoform X1///40S ribosomal S4///PREDICTED: uncharacterized protein LOC104905839///ubiquitin- ligase///BTB POZ domain-containing FBL11-like isoform X2	9.97861	8.97546	0.0027363	0.038561
c91114_g1	dynamin-related 3A-like///dynamin-related 3A-like isoform X1	5.2664	8.9754	0.00273639	0.038561
c82025_g10	heptahelical transmembrane 4 isoform X1	3.89163	8.97208	0.00274137	0.0385998
c69012_g3	annexin D2-like	5.62202	8.96625	0.00275013	0.0386449
c79397_g2	WVD2-like 1	5.48325	8.96775	0.00274787	0.0386449
c93542_g2	probable WRKY transcription factor 2 isoform X1	2.37006	8.96549	0.00275127	0.0386449
c71899_g2	DNA-binding S1FA-like	6.92157	8.95127	0.00277277	0.038797
c75599_g6	hypothetical protein BVRB_8g200520	1.14817	8.95092	0.00277329	0.038797
c76510_g1	probable serine threonine- kinase nek3	0.781592	8.95507	0.00276701	0.038797
c77178_g3	F-box SKIP23-like	3.52738	8.95666	0.00276461	0.038797
c87600_g5	gamma-glutamyl hydrolase 2-like	6.30402	8.95294	0.00277024	0.038797
c83212_g2	SHI RELATED SEQUENCE 1	2.85279	8.94162	0.00278746	0.0389637
c78179_g1	probable serine threonine- kinase At4g35230	5.96583	8.94004	0.00278987	0.038966
c87457_g1	BAG family molecular chaperone regulator chloroplastic///BTB POZ domain-containing At3g09030	6.30611	8.93682	0.00279479	0.0390032
c83597_g1	glutathione S-transferase T1-like	5.84065	8.92892	0.0028069	0.0391407
c83082_g1	NAC domain-containing 89-like isoform X1///NAC domain-containing 89	3.56764	8.92029	0.0028202	0.0392629
c83619_g4	salicylic acid-binding 2-like///A Chain Crystal Structure Of Polyneuridine Aldehyde Esterase Complexed With 16-Epi-Vellosimine	4.63272	8.92058	0.00281974	0.0392629
c83654_g2	probable choline kinase 1///probable choline kinase 1 isoform X1	4.2944	8.89989	0.00285187	0.0396401
c91657_g2	60 kDa jasmonate-induced -like	0.600795	8.90107	0.00285004	0.0396401
c80468_g5	zinc finger BED domain-containing RICESLEEPER 2-like	3.27584	8.89173	0.00286465	0.0397859
c92352_g1	TRIGALACTOSYLDIACYLGLYCEROL chloroplastic///20 kDa chloroplastic	7.32611	8.87975	0.00288351	0.0400156
c92141_g2	ultraviolet-B receptor UVR8-like isoform X1///probable E3 ubiquitin- ligase HERC4///ultraviolet-B receptor UVR8-like isoform X2	4.7364	8.87638	0.00288884	0.0400575
c71496_g1	ubiquitin-60S ribosomal L40-like	3.75767	8.8705	0.00289816	0.0401225
c76325_g1	auxin-induced 22D-like///auxin-responsive IAA4-like	4.41881	8.87153	0.00289652	0.0401225
c73791_g1	STRUBBELIG-RECEPTOR FAMILY 6	2.53359	8.86498	0.00290693	0.040181
c88730_g1	A Chain Crystal Structure Of Pokeweed Lectin-C///Agglutinin isolectin 2	3.49343	8.86492	0.00290702	0.040181
c82131_g1	deoxyuridine 5 -triphosphate nucleotidohydrolase	7.18672	8.85685	0.00291991	0.0403269
c91337_g3	histone deacetylase 14	1.50216	8.84886	0.00293272	0.0404715
c72967_g2	LIGHT-DEPENDENT SHORT HYPOCOTYLS 10-like	1.33411	8.84393	0.00294066	0.0405488
c87325_g3	developmental SEPALLATA 1 isoform X3	7.44141	8.84219	0.00294346	0.0405551
c88976_g7	ATP-dependent DNA helicase pif1-like	2.25138	8.83755	0.00295094	0.0406259
c86005_g2	tyrosine- phosphatase///probable tyrosine- phosphatase At1g05000	3.63395	8.8345	0.00295588	0.0406427
c90489_g1	probable galactinol--sucrose galactosyltransferase 2	5.7049	8.8339	0.00295686	0.0406427
c94363_g8	L-arabinokinase-like isoform X1	3.95786	8.82786	0.00296667	0.0407452
c95241_g2	DNA binding,ATP isoform 2	4.12673	8.8235	0.00297376	0.0408102
c94200_g2	probable indole-3-acetic acid-amido synthetase	7.51518	8.81757	0.00298344	0.0409108
c94114_g1	G-type lectin S-receptor-like serine threonine- kinase RLK1	0.583089	8.81454	0.0029884	0.0409462
c83565_g4	probable transmembrane ascorbate ferrireductase 2	3.20301	8.80586	0.00300264	0.0411089
c86520_g1	Ribosomal L25 Gln-tRNA anti-codon-binding domain	5.38412	8.80321	0.00300701	0.0411362
c75504_g1	aldehyde dehydrogenase family 3 member H1-like isoform X1///aldehyde dehydrogenase family 3 member H1-like	5.96983	8.80052	0.00301145	0.0411644
c78857_g4	nucleoside diphosphate kinase chloroplastic	5.19266	8.79722	0.0030169	0.0412064
c94820_g1	serine threonine- kinase PEPKR2-like	7.47605	8.77427	0.0030551	0.0416952
c80762_g2	zinc finger BED domain-containing RICESLEEPER 2-like	1.1195	8.75766	0.00308304	0.0420313
c87407_g3	ribose-phosphate pyrophosphokinase 4	2.79669	8.75675	0.00308458	0.0420313
c81430_g3	caffeine synthase 1-like///theobromine synthase	-0.102763	8.74538	0.00310388	0.042261
c65444_g1	TRNA--methyltransferase non-catalytic subunit trm6MTase subunit	4.80735	8.74215	0.00310938	0.0423027
c88518_g1	poly	1.13755	8.73137	0.00312781	0.0424867
c90618_g1	GMP synthase	6.24559	8.7322	0.00312639	0.0424867
c91165_g1	copper-transporting ATPase chloroplastic	6.5058	8.71798	0.00315088	0.0427665
c86260_g2	GTP-binding chloroplastic	5.3608	8.71592	0.00315444	0.0427813
c93379_g8	guanylate-binding 3	4.85345	8.71147	0.00316214	0.0428522
c76350_g2	3 -5 exoribonuclease 1-like	4.0075	8.70783	0.00316846	0.0429043
c85750_g2	probable sugar phosphate phosphate translocator At5g04160	5.85737	8.69986	0.00318235	0.0430587
c69117_g1	exosome complex component CSL4	6.24164	8.69019	0.00319928	0.0431481
c88911_g2	U3 small nucleolar RNA-associated 14 homolog A///U3 small nucleolar RNA-associated 14	6.82128	8.68897	0.00320142	0.0431481
c90482_g6	pantoate--beta-alanine ligase///F-box SKIP23-like	4.61144	8.69157	0.00319686	0.0431481
c91392_g1	P-hydroxybenzoic acid efflux pump subunit aaeB	1.19515	8.69309	0.00319419	0.0431481
c94744_g2	UV-B-insensitive 4	4.05525	8.69133	0.00319728	0.0431481
c67664_g1	tyrosine decarboxylase 1-like///PREDICTED: uncharacterized protein LOC105167735	1.11189	8.67604	0.0032242	0.0434214
c70493_g2	ribonuclease H At1g65750///hypothetical protein SOVF_206000	2.75936	8.66426	0.00324512	0.0436692
c83013_g7	hydroxyproline-rich glyco	3.05781	8.64634	0.00327719	0.0440665
c67141_g3	potassium transporter 6-like	3.18367	8.64072	0.00328732	0.0441684
c72746_g1	---NA---	-0.356051	8.63369	0.00330003	0.0442705
c87364_g1	aspartate chloroplastic	7.18952	8.63455	0.00329846	0.0442705
c88558_g2	syntaxin-related KNOLLE	3.51556	8.63171	0.00330362	0.0442843
c80347_g1	F-box At1g47056-like	5.2578	8.62673	0.00331265	0.0443699
c80449_g1	ribosomal RNA small subunit methyltransferase nep-1	6.94396	8.6235	0.00331853	0.0443699
c84523_g3	DNA polymerase zeta processivity subunit isoform X1	3.80472	8.62529	0.00331527	0.0443699
c88995_g3	GTP-binding nuclear Ran-3	9.72692	8.62256	0.00332025	0.0443699
c85650_g1	galactose oxidase-like///probable sodium-coupled neutral amino acid transporter 6///sodium-coupled neutral amino acid transporter 7///galactose oxidase///sodium-coupled neutral amino acid transporter 5	1.42147	8.61996	0.00332499	0.044399
c95175_g1	retroelement pol poly -like	0.737638	8.61551	0.00333313	0.0444734
c37711_g1	BURP domain-containing 3-like	0.84294	8.59545	0.00337004	0.0448968
c95110_g2	F-box LRR-repeat At4g14103-like isoform X1	2.89141	8.59679	0.00336756	0.0448968
c91300_g5	CBL-interacting serine threonine- kinase 1///CBL-interacting serine threonine- kinase 1-like	7.1413	8.59053	0.00337915	0.0449775
c94037_g3	oxygen-dependent coproporphyrinogen-III chloroplastic	8.28186	8.58938	0.0033813	0.0449775
c86578_g4	monothiol glutaredoxin-S1-like	1.36862	8.58481	0.00338979	0.0450559
c91841_g3	scarecrow 23///leucine-rich repeat-containing DDB_G0290503 isoform X2///Uro-adherence factor A	6.53511	8.58183	0.00339534	0.0450574
c92312_g6	PREDICTED: uncharacterized protein LOC104907234 isoform X1	4.39915	8.58325	0.00339269	0.0450574
c93899_g3	folic acid synthesis fol1-like isoform X1///folic acid synthesis fol1///Folic acid synthesis fol1	4.68244	8.58056	0.00339771	0.0450574
c87025_g1	phosphate metabolism 8	6.85753	8.57829	0.00340195	0.045079
c80302_g1	probable sulfate transporter	6.27424	8.57658	0.00340514	0.0450869
c80252_g1	uncharacterized LOC103438687///NAC domain-containing 62///NAC transcription factor-like 9	4.56026	8.56619	0.00342462	0.0453102
c94437_g1	probable polygalacturonase	7.04791	8.55778	0.0034405	0.0454855
c85602_g1	L-ascorbate oxidase homolog	1.98852	8.54817	0.0034587	0.0456648
c91634_g2	mitochondrial isoform X1	3.04387	8.54783	0.00345933	0.0456648
c92813_g1	short-chain dehydrogenase TIC chloroplastic-like///clathrin assembly At1g25240	5.04605	8.54332	0.00346793	0.0457434
c92044_g2	ASPARTIC PROTEASE IN GUARD CELL 2	9.75746	8.537	0.00348	0.0458676
c77313_g1	cold-inducible RNA-binding -like	4.41743	8.52588	0.00350131	0.0460784
c91225_g3	serpin-ZX	0.713858	8.5268	0.00349954	0.0460784
c88607_g1	prefoldin subunit 6	5.85903	8.52092	0.00351086	0.046169
c82104_g1	dynein light chain cytoplasmic	6.54405	8.51257	0.00352702	0.0463463
c90985_g1	src substrate p85-like	5.59397	8.49738	0.00355659	0.0466641
c91736_g3	Hyaluronan mRNA binding family isoform 1///plasminogen activator inhibitor 1 RNA-binding -like	8.52114	8.49808	0.00355522	0.0466641
c83897_g6	myosin-11 isoform X2///PREDICTED: myosin-11	5.97175	8.4927	0.00356574	0.0467487
c86225_g1	ETHYLENE INSENSITIVE 3-like	3.99994	8.48664	0.00357764	0.0468375
c88431_g1	bifunctional riboflavin biosynthesis RIBA chloroplastic	6.03006	8.48376	0.0035833	0.0468375
c91168_g1	7-deoxyloganetic acid glucosyltransferase-like	2.57072	8.48394	0.00358295	0.0468375
c92323_g2	RING-H2 finger ATL51-like	4.99758	8.4824	0.00358599	0.0468375
c92410_g4	DNA-damage-repair toleration DRT100-like	3.39524	8.48238	0.00358603	0.0468375
c83419_g1	SNF2 domain-containing CLASSY 4-like	4.9817	8.47334	0.00360389	0.0470352
c87039_g5	rotamase FKBP 1	2.43156	8.46293	0.00362457	0.0472696
c76317_g1	hypothetical protein SOVF_031100///astaxanthin synthase///Saccharopine dehydrogenase isoform 2	4.63286	8.45529	0.00363983	0.0474328
c93154_g1	peroxisomal membrane Mpv17 PMP22 family	4.42141	8.45158	0.00364726	0.047494
c92728_g1	filament-like plant 7///Filament-like plant isoform 1	5.0741	8.45018	0.00365008	0.0474949
c95228_g2	triphosphate tunel metalloenzyme 3	9.43991	8.44616	0.00365815	0.0475642
c94580_g1	12-oxophytodienoate reductase 3-like	5.9767	8.44171	0.00366711	0.0476449
c80023_g10	omega-3 fatty acid chloroplastic-like///omega-3 fatty acid chloroplastic	7.48367	8.42928	0.00369226	0.0479358
c75161_g1	F-box LRR-repeat At4g14103-like	0.691358	8.42744	0.003696	0.0479483
c73407_g1	probable beta-1,3-galactosyltransferase 14	5.60405	8.41804	0.00371517	0.0481609
c87972_g2	ATP-dependent (S)-NAD(P)H-hydrate dehydratase///ATP-dependent (S)-NAD(P)H-hydrate dehydratase isoform X1	5.10662	8.41347	0.0037245	0.0482458
c75474_g2	polyadenylate-binding 2-like isoform X2	2.31048	8.40657	0.00373868	0.048321
c79369_g10	NADH-plastoquinone oxidoreductase subunit 2 (chloroplast)	2.26494	8.40819	0.00373534	0.048321
c88013_g2	heat shock cognate 70 kDa -like	5.29108	8.40773	0.00373628	0.048321
c86529_g1	Guanosine-5 -triphosphate,3 -diphosphate///50S ribosomal chloroplastic-like isoform X1	6.0778	8.40299	0.00374604	0.0483801
c87777_g4	biotin carboxylase chloroplastic	7.27061	8.39888	0.00375453	0.0484536
c94657_g3	probable ABIL5 isoform X1	5.66097	8.39596	0.00376055	0.0484952
c72688_g2	cytosolic sulfotransferase 5-like	4.16013	8.39269	0.00376732	0.0485463
c93940_g2	Adenine phosphoribosyl transferase 1 isoform 1	8.06228	8.39048	0.0037719	0.0485692
c74887_g1	auxin-responsive IAA14-like	3.9007	8.36776	0.00381936	0.0491437
c87854_g1	uncharacterized acetyltransferase At3g50280-like	1.70705	8.36186	0.00383178	0.049267
c79125_g11	uncharacterized SDCCAG3 family -like	6.30203	8.3463	0.00386473	0.0496172
c84387_g3	zinc finger JACKDAW///zinc finger MAGPIE-like	3.06915	8.344	0.00386962	0.0496172
c86927_g1	DNA-directed RNA polymerases IV and V subunit 6A-like	1.80628	8.34374	0.00387019	0.0496172
c90107_g3	probable LRR receptor-like serine threonine- kinase At4g37250	3.87133	8.3436	0.00387048	0.0496172
c82576_g2	scarecrow 15	1.96974	8.33783	0.00388279	0.049703
c84226_g1	chloroplastic-like	3.71819	8.33777	0.00388291	0.049703
c87660_g6	disease resistance At4g27190-like isoform X1///disease resistance At4g27190-like	2.07482	8.32636	0.00390739	0.0499567
c91633_g1	O-Glycosyl hydrolases family 17	6.17715	8.32584	0.0039085	0.0499567

## Sheet: DEGsMU_Vs_FU_All
GENE	DESCRIPTION	LR	PValue	FDR
c50328_g1	ABC transporter F family member 1	5.12535	294.351	5.60551e-66	1.01852e-61
c95095_g12	phytochrome A	3.62728	216.239	5.98037e-49	5.43316e-45
c75880_g12	subtilase family	3.30753	184.039	6.36323e-42	3.85399e-38
c67603_g1	ABC transporter F family member 1	4.94824	177.766	1.48998e-40	6.76826e-37
c86406_g2	FAR1-RELATED SEQUENCE 5-like	4.34323	166.287	4.78862e-38	1.74018e-34
c87979_g1	hypothetical protein BVRB_5g113070///hypothetical protein BVRB_8g188680///PREDICTED: uncharacterized protein LOC104901480///hypothetical protein BVRB_1g012810	3.74264	157.63	3.72803e-36	1.12897e-32
c89627_g2	zinc finger BED domain-containing RICESLEEPER 2-like	3.18258	125.74	3.505e-29	9.09797e-26
c68293_g6	splicing proline- and glutamine-rich-like	3.06599	115.822	5.20008e-27	1.18107e-23
c77380_g1	PREDICTED: uncharacterized protein LOC104899180	3.51954	114.361	1.0862e-26	2.19292e-23
c95238_g2	70 kDa peptidyl-prolyl isomerase-like	2.50064	104.917	1.27351e-24	2.31397e-21
c91238_g1	F-box LRR-repeat 23	2.01758	103.008	3.33757e-24	5.51305e-21
c25822_g1	Fgenesh 35	2.26911	94.9131	1.98929e-22	3.01212e-19
c27199_g1	non-LTR retroelement reverse transcriptase-like	3.44785	94.3724	2.61416e-22	3.65378e-19
c67700_g1	RNA-dependent RNA polymerase	4.11788	91.9602	8.84388e-22	1.14781e-18
c87039_g3	peptidyl-prolyl cis-trans isomerase FKBP62-like isoform X2	1.78259	91.6292	1.04537e-21	1.26629e-18
c71253_g1	AF525305_2 AP endonuclease reverse transcriptase	1.60363	88.0705	6.31615e-21	7.17278e-18
c90864_g6	non-LTR retroelement reverse transcriptase	2.26141	81.3467	1.89396e-19	2.02431e-16
c79862_g6	mariner transposase	2.71795	80.4604	2.96584e-19	2.99385e-16
c80571_g3	mitochondrial outer membrane porin of 36 kDa	2.30509	78.4624	8.15336e-19	7.79719e-16
c78763_g3	fatty acyl- reductase 2-like	2.76511	77.7505	1.16915e-18	1.06217e-15
c81309_g5	zinc-finger homeodomain 9-like	1.57735	77.3865	1.40576e-18	1.21632e-15
c82116_g3	phospholipase D alpha 1-like	3.71047	77.1766	1.56332e-18	1.29116e-15
c78913_g2	unnamed protein product///PREDICTED: uncharacterized protein LOC101755892	4.9608	77.0671	1.65246e-18	1.30544e-15
c88638_g4	hypothetical protein SOVF_195130///hypothetical protein BVRB_7g164140///hypothetical protein SOVF_027900	1.95337	74.9608	4.80149e-18	3.63513e-15
c92608_g1	---NA---	1.36909	74.7286	5.40086e-18	3.92535e-15
c80419_g4	---NA---	0.672102	74.3064	6.68877e-18	4.67442e-15
c57855_g1	hypothetical protein BVRB_7g177280	0.660003	73.4093	1.05367e-17	7.09084e-15
c87040_g2	11-beta-hydroxysteroid dehydrogenase 1B-like	0.74688	72.8495	1.39924e-17	9.08008e-15
c94224_g2	Inner membrane oxaA	4.22298	71.5521	2.70034e-17	1.6919e-14
c78346_g2	PREDICTED: uncharacterized protein LOC104803157	1.88502	70.3751	4.90359e-17	2.96994e-14
c68830_g2	PREDICTED: uncharacterized protein LOC104891244	2.10537	70.1413	5.52055e-17	3.23576e-14
c86717_g6	AF525305_2 AP endonuclease reverse transcriptase///PREDICTED: uncharacterized protein LOC104905156	1.96149	69.9138	6.19545e-17	3.51786e-14
c71126_g17	PREDICTED: uncharacterized protein LOC104884430	0.977033	69.0161	9.76634e-17	5.3774e-14
c77197_g5	PREDICTED: uncharacterized protein LOC104903161	1.61845	68.3786	1.34936e-16	7.21115e-14
c76199_g3	Alpha-L-fucosidase 2	0.774914	67.3088	2.32148e-16	1.20518e-13
c87452_g3	---NA---	1.56024	65.5131	5.77281e-16	2.91366e-13
c92543_g1	AC092548_5 TNP2-like transposon///transposon En Spm sub-class	2.587	65.3588	6.24301e-16	3.06582e-13
c78869_g4	AC069473_8 gypsy Ty-3 retroelement poly 69905-74404	2.55805	63.8787	1.32318e-15	6.32691e-13
c78851_g1	copia isoform X1	2.46311	63.2961	1.7786e-15	8.28646e-13
c85717_g1	FAR1-RELATED SEQUENCE 5-like	2.3133	61.0441	5.58091e-15	2.53513e-12
c80330_g6	---NA---///splicing proline- and glutamine-rich-like	1.42961	60.4638	7.49453e-15	3.18918e-12
c81911_g1	retroelement pol poly	-0.0113006	60.4877	7.40389e-15	3.18918e-12
c84588_g6	LINE-type retrotransposon LIb DNA	2.40693	60.45	7.54733e-15	3.18918e-12
c77727_g6	poly///Retrovirus-related Pol poly from transposon TNT 1-94	0.522988	59.4765	1.23764e-14	5.03205e-12
c92682_g6	PREDICTED: uncharacterized protein LOC104890289	1.29465	59.4629	1.24624e-14	5.03205e-12
c82019_g2	ATP-dependent DNA helicase PIF1-like///ATP-dependent DNA helicase pif1-like	3.77913	58.6486	1.88506e-14	7.446e-12
c71370_g5	zinc finger BED domain-containing RICESLEEPER 2-like	0.785463	58.5922	1.93983e-14	7.49932e-12
c81609_g5	---NA---	1.19956	58.1495	2.42939e-14	9.19626e-12
c85519_g1	G-type lectin S-receptor-like serine threonine- kinase At1g11300///G-type lectin S-receptor-like serine threonine- kinase SD1-13///G-type lectin S-receptor-like serine threonine- kinase At1g11330	3.99361	58.1049	2.48507e-14	9.21506e-12
c81911_g8	retroelement pol poly -like	-0.0315625	57.5643	3.27101e-14	1.18869e-11
c87658_g1	GDSL esterase lipase At4g10955-like	0.699451	56.908	4.56683e-14	1.62704e-11
c78446_g3	pentatricopeptide repeat-containing At3g29290	1.66443	56.7404	4.9732e-14	1.73775e-11
c71260_g4	nuclease HARBI1///L10-interacting MYB domain-containing -like	0.270228	56.5082	5.59657e-14	1.91867e-11
c78497_g4	PREDICTED: uncharacterized protein LOC104898097///hypothetical protein	1.12755	55.0676	1.16454e-13	3.91848e-11
c90855_g2	non-LTR retroelement reverse transcriptase	3.40506	54.4777	1.57222e-13	5.19403e-11
c72494_g1	FKBP-type peptidyl-prolyl cis-trans isomerase	-0.817904	53.5565	2.51266e-13	8.15267e-11
c78605_g2	DNA RNA polymerases superfamily///GTP-binding SAR1B-like	2.64812	51.8208	6.08054e-13	1.9383e-10
c85148_g1	B3 domain-containing Os01g0723500-like	2.57488	51.7349	6.3522e-13	1.98999e-10
c71351_g6	hypothetical protein SOVF_172930///ribonuclease H At1g65750	0.390095	50.5456	1.16429e-12	3.58563e-10
c84292_g6	shock SRC2	3.68693	50.4439	1.22621e-12	3.71338e-10
c91372_g3	sugar transport 8///sugar transport 8-like isoform X1	-1.03349	49.9252	1.5972e-12	4.75757e-10
c94826_g1	Retrotransposon gag///hypothetical protein BVRB_4g095420	1.55143	49.1014	2.43065e-12	7.12336e-10
c89056_g1	phospholipase D epsilon	2.5447	48.91	2.67976e-12	7.72878e-10
c74436_g4	cytochrome P450 71A3-like	2.33536	48.4034	3.46971e-12	9.85074e-10
c88207_g2	PREDICTED: uncharacterized protein LOC104893500///PREDICTED: uncharacterized protein LOC104897198///flocculation FLO11-like	1.62134	48.1185	4.01232e-12	1.1216e-09
c77667_g2	proliferation-associated 2G4-like	-0.0279631	47.8141	4.68611e-12	1.2901e-09
c72403_g5	AF525305_2 AP endonuclease reverse transcriptase///PREDICTED: uncharacterized protein LOC104899180	0.318614	47.0646	6.86851e-12	1.8627e-09
c84010_g3	hypothetical protein glysoja_044118	0.0492063	46.5797	8.79657e-12	2.35049e-09
c74180_g1	---NA---	5.29746	46.5432	8.96185e-12	2.35995e-09
c88130_g1	AC069473_8 gypsy Ty-3 retroelement poly 69905-74404///ras GTPase-activating -binding 1-like	2.00337	46.0962	1.12589e-11	2.92249e-09
c86717_g3	PREDICTED: uncharacterized protein LOC104887201	0.598658	45.9475	1.21466e-11	3.1085e-09
c70860_g8	argonaute 2-like	-0.166486	44.7921	2.19109e-11	5.52946e-09
c86672_g2	PREDICTED: uncharacterized protein LOC104892995	0.0707798	44.4369	2.62688e-11	6.53842e-09
c84603_g3	ras-related RABA2a	5.40837	44.2058	2.95609e-11	7.2584e-09
c87005_g1	C globular///Serine threonine phosphatase 7 long	3.31511	43.2847	4.73258e-11	1.14655e-08
c92092_g6	Retrovirus-related Pol poly from transposon TNT 1-94///PREDICTED: uncharacterized protein LOC104905511///retroelement pol poly	1.50563	43.2501	4.81716e-11	1.15168e-08
c95302_g2	T00833 RNA-directed DNA polymerase homolog - Arabidopsis thaliana (fragment)	2.49753	43.1725	5.01195e-11	1.18269e-08
c76878_g7	retroelement pol poly///PREDICTED: uncharacterized protein LOC104906328	3.09589	43.0531	5.32743e-11	1.24102e-08
c72677_g2	lipid transfer	4.80404	42.1462	8.46963e-11	1.94802e-08
c76057_g8	TRANSPARENT TESTA 12-like	1.26864	42.0781	8.77016e-11	1.99192e-08
c95056_g2	disease resistance RGA1	0.867861	41.3654	1.26272e-10	2.83254e-08
c76097_g7	ribonuclease H At1g65750	-0.230417	40.2476	2.2373e-10	4.95754e-08
c75638_g6	endonuclease exonuclease phosphatase family	0.385199	39.83	2.77055e-10	6.06516e-08
c45089_g1	---NA---	-0.258525	39.7831	2.83797e-10	6.13879e-08
c81155_g2	hypothetical protein BVRB_7g177090 isoform C///sieve element occlusion a///sieve element occlusion 1	4.80064	39.3538	3.53566e-10	7.558e-08
c77007_g3	Sodium calcium exchanger family calcium-binding EF hand family isoform 1///sodium calcium exchanger///sodium calcium exchanger family	3.9624	39.2454	3.73755e-10	7.89666e-08
c79620_g5	AC069473_8 gypsy Ty-3 retroelement poly 69905-74404	0.238347	39.2145	3.79702e-10	7.93009e-08
c85705_g5	PREDICTED: uncharacterized protein LOC105180271///ribonuclease H At1g65750	-0.166743	38.9646	4.3155e-10	8.91052e-08
c73534_g1	replication A 70 kDa DNA-binding subunit B-like///replication A 70 kDa DNA-binding subunit D-like	1.29725	38.6732	5.01039e-10	1.02291e-07
c73880_g5	PREDICTED: uncharacterized protein LOC104885134///retroelement pol poly -like///LTR retrotransposon like	0.178631	38.3736	5.84165e-10	1.17936e-07
c84757_g2	probable glycosyltransferase At5g11130	1.59304	37.9967	7.08642e-10	1.41495e-07
c74153_g4	PREDICTED: uncharacterized protein LOC104248941	0.384305	37.7899	7.87886e-10	1.55608e-07
c91548_g6	AC079604_5 copia-type	2.07269	37.0813	1.13306e-09	2.19019e-07
c92521_g6	PREDICTED: uncharacterized protein LOC104901854///---NA---	-0.445644	37.0934	1.12605e-09	2.19019e-07
c80645_g1	linoleate 13S-lipoxygenase 3- chloroplastic	1.89099	37.0457	1.1539e-09	2.20699e-07
c91872_g1	kDa class I heat shock -like	7.1074	36.9683	1.20063e-09	2.27245e-07
c83327_g2	Fgenesh 35	0.949401	36.8968	1.24551e-09	2.33308e-07
c84266_g3	PREDICTED: uncharacterized protein LOC104883482///PREDICTED: uncharacterized protein LOC104907437///pollen-specific leucine-rich repeat extensin 1	3.14783	36.5073	1.52092e-09	2.81991e-07
c86870_g3	guanosine nucleotide diphosphate dissociation inhibitor At5g09550	1.07232	36.212	1.76976e-09	3.24814e-07
c83998_g1	PREDICTED: uncharacterized protein LOC104886889	0.662737	36.0735	1.90016e-09	3.45258e-07
c79133_g1	PREDICTED: uncharacterized protein LOC104886446///PREDICTED: uncharacterized protein LOC104893317	2.27915	35.8657	2.11398e-09	3.80308e-07
c76838_g5	gag-pol poly	-0.453398	35.7743	2.21555e-09	3.94673e-07
c79153_g5	PREDICTED: uncharacterized protein LOC105852116	0.0761011	35.6392	2.37463e-09	4.18904e-07
c77125_g2	polygalacturonase At1g48100///polygalacturonase At1g48100-like///PREDICTED: uncharacterized protein LOC104884318	6.06486	35.4743	2.58436e-09	4.51517e-07
c87834_g4	ribosomal S10 (mitochondrion)	0.717093	35.3561	2.74608e-09	4.75202e-07
c74419_g1	hypothetical protein BVRB_8g200520	0.474628	34.723	3.80109e-09	6.51565e-07
c81430_g2	theobromine synthase	-0.0936012	34.5085	4.24402e-09	7.20689e-07
c88932_g3	---NA---	0.544131	34.2869	4.75579e-09	8.00118e-07
c83309_g2	cytochrome b561 and DOMON domain-containing At5g47530-like	4.90423	34.2524	4.84089e-09	8.06964e-07
c89983_g2	gamma-glutamylcyclotransferase At3g02910	2.62742	33.9783	5.57296e-09	9.20552e-07
c77156_g5	PREDICTED: uncharacterized protein LOC104903416	1.0483	33.5716	6.86869e-09	1.12436e-06
c78187_g6	ribonuclease H At1g65750///PREDICTED: uncharacterized protein LOC104905754///PREDICTED: uncharacterized protein LOC104896166	-0.288303	33.5256	7.03334e-09	1.14103e-06
c94543_g1	nicotinamide mononucleotide adenylyltransferase isoform X1	4.07285	33.4448	7.33152e-09	1.17888e-06
c84501_g2	---NA---	0.380399	33.0604	8.93408e-09	1.42397e-06
c88459_g1	PREDICTED: uncharacterized protein LOC102661939///ty1-copia retrotransposon	-0.0291912	32.6223	1.11924e-08	1.7684e-06
c78763_g2	Retrovirus-related Pol poly from transposon TNT 1-94///fatty acyl- reductase 2-like	2.41048	32.5217	1.17869e-08	1.84627e-06
c70401_g1	bidirectional sugar transporter SWEET14	-0.111385	32.4429	1.22749e-08	1.89081e-06
c92786_g3	ribonuclease H At1g65750	-0.367266	32.4422	1.22793e-08	1.89081e-06
c77047_g1	PREDICTED: uncharacterized protein LOC104891244	1.76949	32.1072	1.45893e-08	2.22762e-06
c82797_g1	methylesterase 17-like///methyl esterase 17	2.02995	31.9272	1.60056e-08	2.42352e-06
c86378_g2	G-type lectin S-receptor-like Serine Threonine-kinase///G-type lectin S-receptor-like serine threonine- kinase At1g11330///S-locus lectin kinase family partial	1.96928	31.5856	1.90844e-08	2.86582e-06
c78586_g2	PREDICTED: uncharacterized protein LOC104888642	1.13965	31.4021	2.09757e-08	3.12401e-06
c94691_g2	BRCT domain-containing At4g02110	6.53732	31.3589	2.14475e-08	3.16831e-06
c88918_g1	tetraketide alpha-pyrone reductase 2	0.851798	31.0246	2.54785e-08	3.73342e-06
c81791_g1	wall-associated receptor kinase 2-like	3.28283	30.8957	2.7228e-08	3.95786e-06
c92202_g2	---NA---	1.4564	30.5185	3.30694e-08	4.76882e-06
c89291_g4	thiosulfate sulfurtransferase 18-like isoform X2///thiosulfate sulfurtransferase 18-like isoform X1	3.84783	29.7814	4.83617e-08	6.91915e-06
c93385_g2	F-box FBD LRR-repeat At1g13570-like///F-box LRR-repeat 25-like	4.49822	29.5931	5.32951e-08	7.5654e-06
c86898_g1	SRG1-like///Codeine O-demethylase	0.396448	29.4228	5.81878e-08	8.19591e-06
c80304_g1	anthranilate synthase alpha subunit chloroplastic-like	2.51422	29.0404	7.0885e-08	9.90754e-06
c88135_g1	PREDICTED: uncharacterized protein LOC104894136///PREDICTED: uncharacterized protein LOC104894134 isoform X2	8.03926	28.762	8.18403e-08	1.13514e-05
c90799_g3	pyroglutamyl-peptidase 1	4.68985	28.592	8.9352e-08	1.22994e-05
c92885_g2	RNA-directed DNA polymerase	0.631608	28.5195	9.27602e-08	1.26726e-05
c67901_g1	non-specific lipid-transfer At2g13820 precursor///non-specific lipid transfer GPI-anchored 2-like	2.69966	28.3674	1.00343e-07	1.36062e-05
c46553_g1	replication factor-A carboxy-terminal domain	0.521297	28.207	1.0901e-07	1.46656e-05
c84158_g8	YLS9-like	0.81389	28.1935	1.0977e-07	1.46656e-05
c53374_g1	homologous-pairing 2 homolog	5.11184	28.1217	1.13923e-07	1.51093e-05
c94121_g6	zinc finger BED domain-containing RICESLEEPER 2-like///zinc finger BED domain-containing RICESLEEPER 1-like	4.27491	28.0331	1.1926e-07	1.57026e-05
c72996_g6	MADS-box CMB1-like///MADS-box CMB1	3.57258	27.5923	1.49772e-07	1.95781e-05
c80771_g4	FAR1-RELATED SEQUENCE 5-like	1.11827	27.411	1.64496e-07	2.13492e-05
c77653_g1	hypothetical protein SOVF_125400	3.46722	26.8737	2.17193e-07	2.79886e-05
c87936_g2	hypothetical protein SOVF_021510	5.76623	26.3504	2.84763e-07	3.64376e-05
c87988_g3	formin 4	1.24592	26.3056	2.91448e-07	3.70322e-05
c83913_g2	tyrosine-specific transport 2-like///Tryptophan tyrosine permease	0.998952	26.0832	3.27021e-07	4.09791e-05
c89473_g2	hypothetical protein SOVF_138000///PREDICTED: uncharacterized protein LOC104887544 isoform X1///hypothetical protein BVRB_2g041740	5.6377	26.086	3.26536e-07	4.09791e-05
c83513_g1	probable ran guanine nucleotide release factor	4.64657	25.9147	3.56847e-07	4.44103e-05
c86559_g4	fructose-bisphosphate aldolase chloroplastic	6.63203	25.771	3.84429e-07	4.75175e-05
c87283_g5	retroelement pol poly///hypothetical protein BVRB_5g117090	0.281838	25.5062	4.40963e-07	5.41372e-05
c85488_g5	B3 domain-containing Os01g0723500-like	-0.428709	25.4681	4.49764e-07	5.4847e-05
c82239_g9	receptor kinase At4g00960	5.54209	25.3807	4.70603e-07	5.70057e-05
c73112_g2	F-box kelch-repeat At4g12810	2.0314	25.2663	4.99353e-07	6.00877e-05
c62607_g1	ALB2_PEA ame: Full=Albumin-2 ame: Full=PA2	0.532334	25.0052	5.71752e-07	6.83469e-05
c88687_g1	adoMet-dependent rRNA methyltransferase spb1	7.73696	24.8573	6.17359e-07	7.33164e-05
c87721_g1	auxin-binding ABP19a	7.71553	24.6547	6.85777e-07	8.09127e-05
c70145_g1	subtilisin-like protease	0.125014	24.52	7.35437e-07	8.62122e-05
c74436_g3	cytochrome P450 71A22-like	0.514209	24.3397	8.07591e-07	9.40637e-05
c69091_g3	bifunctional riboflavin kinase FMN phosphatase-like	3.61479	23.8967	1.01644e-06	0.000117635
c94154_g1	PREDICTED: uncharacterized protein LOC104891772///topoisomerase I	8.43706	23.8499	1.04148e-06	0.000119771
c83365_g7	PREDICTED: uncharacterized protein LOC104883796	1.13377	23.7888	1.07507e-06	0.000122855
c81009_g1	elongation factor 1-gamma-like	5.60785	23.5685	1.20547e-06	0.000136896
c53529_g1	PREDICTED: uncharacterized protein LOC104897110	2.26133	23.5312	1.22905e-06	0.000138707
c31856_g1	LINE-1 reverse transcriptase homolog	0.813908	23.3718	1.3352e-06	0.000149757
c82382_g4	AC079604_5 copia-type	2.46673	23.3189	1.37243e-06	0.000152988
c77113_g12	PREDICTED: uncharacterized protein LOC104883796	-0.0523731	23.2994	1.38642e-06	0.000153606
c87604_g2	flocculation FLO11-like isoform X1///two-component response regulator ARR11	5.40427	23.0158	1.60678e-06	0.000176941
c87100_g1	PREDICTED: uncharacterized protein LOC104885266///PREDICTED: uncharacterized protein LOC104891244///PREDICTED: uncharacterized protein LOC104908911	1.72283	22.4803	2.12305e-06	0.000232384
c88042_g3	---NA---///ubiquitin-60S ribosomal L40-like	2.64223	22.4654	2.13961e-06	0.000232794
c85455_g3	scarecrow 30	3.88903	22.2583	2.38331e-06	0.000257766
c83802_g1	hypothetical protein SOVF_110970	2.4356	22.206	2.44904e-06	0.000263308
c82192_g1	PREDICTED: uncharacterized protein LOC104897807///unnamed protein product	3.45991	22.1242	2.55566e-06	0.000273155
c86765_g5	FAR1-RELATED SEQUENCE 5-like	1.29023	22.0149	2.70538e-06	0.000287466
c87791_g1	ribonuclease H At1g65750	-0.180125	21.9971	2.73063e-06	0.000288463
c74772_g1	PI-PLC X domain-containing At5g67130-like isoform X1///PI-PLC X domain-containing At5g67130	6.0184	21.9724	2.76596e-06	0.000290506
c78897_g4	PREDICTED: uncharacterized protein LOC104883423///PREDICTED: uncharacterized protein LOC104897200	0.878426	21.8529	2.94379e-06	0.000307406
c81009_g3	elongation factor 1-gamma-like	6.5327	21.828	2.98212e-06	0.000309629
c82296_g3	geranylgeranyl diphosphate chloroplastic-like	4.66699	21.808	3.01343e-06	0.000311102
c76056_g4	CBL-interacting serine threonine- kinase 7-like	-0.0965964	21.6972	3.19261e-06	0.000327739
c87338_g3	zinc finger CCCH domain-containing 15-like isoform X1///Zinc finger CCCH domain-containing 15	1.54198	21.5907	3.37485e-06	0.000344501
c73941_g8	ribonuclease H At1g65750	0.55068	21.5751	3.40233e-06	0.000345365
c82287_g1	Thioredoxin isoform 1///Thioredoxin isoform 2///PREDICTED: uncharacterized protein LOC104903363///hypothetical protein SOVF_073580 isoform B	6.02675	21.2	4.1377e-06	0.000417678
c82382_g7	gag-pol identical	0.623665	21.0767	4.4125e-06	0.000442956
c78004_g2	uridine diphosphate glucose dehydrogenase	4.88616	21.0186	4.54842e-06	0.000454092
c94469_g1	A Chain Sugar Beet Alpha-glucosidase With Acarbose	4.52111	20.89	4.8643e-06	0.000482975
c78209_g15	probable S-acyltransferase 19	6.15924	20.7446	5.24793e-06	0.000516696
c94726_g1	replication factor C subunit 2	6.44784	20.7399	5.2608e-06	0.000516696
c77776_g1	(3S,6E)-nerolidol synthase 1-like	2.11622	20.6641	5.47337e-06	0.000534683
c73040_g1	SUMO-conjugating enzyme SCE1	6.37104	20.6011	5.65634e-06	0.000549602
c84756_g2	zinc finger CONSTANS-LIKE 7	0.472231	20.5649	5.76439e-06	0.000557122
c78670_g5	probable cinnamyl alcohol dehydrogenase 1	-0.527322	20.2058	6.95419e-06	0.000668559
c80434_g2	upstream activation factor subunit UAF30	4.62619	20.1553	7.14017e-06	0.000678694
c84106_g1	UPF0481 At3g47200-like	0.805679	20.1609	7.1192e-06	0.000678694
c87045_g2	reticulon B5///seed maturation///reticulon B4	5.76099	20.1469	7.17167e-06	0.000678694
c71920_g2	cold shock 1	1.91127	20.1239	7.25845e-06	0.000683347
c88710_g3	unnamed protein product	-0.217513	20.0838	7.41225e-06	0.00069423
c81153_g1	zinc finger 4-like	4.42286	19.977	7.83807e-06	0.000730348
c85149_g11	L-type lectin-domain containing receptor kinase -like	1.14831	19.9386	7.99707e-06	0.000741361
c74280_g1	MFS transporter	0.113216	19.8594	8.3354e-06	0.000768803
c73220_g2	cyclin-D1-binding 1 homolog	3.28191	19.8351	8.44162e-06	0.000774668
c77552_g1	cytochrome P450 89A2-like	2.69876	19.8	8.59833e-06	0.000781158
c88776_g2	thioredoxin reductase NTRB-like	7.06657	19.8094	8.55619e-06	0.000781158
c84264_g3	F-box family	1.66155	19.6701	9.20324e-06	0.000831954
c90840_g8	probable mannitol dehydrogenase///probable cinnamyl alcohol dehydrogenase 9	0.691832	19.6348	9.37447e-06	0.000843239
c92353_g2	probable serine threonine- kinase WNK10	4.58481	19.4484	1.03356e-05	0.000925113
c88861_g6	rotamase FKBP 1	2.66887	19.3897	1.06579e-05	0.000949281
c86669_g1	UDP-rhamnose:rhamnosyltransferase 1	1.79324	19.3316	1.09873e-05	0.000969124
c92523_g2	mitochondrial alternative oxidase 2	5.91052	19.3403	1.09374e-05	0.000969124
c82398_g4	Indole-3-acetate O-methyltransferase 1	3.45943	19.3059	1.11364e-05	0.000977526
c91113_g7	PHD finger transcription	3.65952	19.1467	1.21047e-05	0.00105742
c73006_g6	replication A 70 kDa DNA-binding subunit D-like	0.841634	19.0131	1.29823e-05	0.00112327
c80652_g4	---NA---	2.23411	19.0138	1.29779e-05	0.00112327
c76085_g1	M-phase phospho 6 isoform X1///PREDICTED: uncharacterized protein LOC104900087	2.43413	19.0007	1.30669e-05	0.00112524
c86436_g1	RING U-box and TRAF-like domains	2.44341	18.9912	1.31323e-05	0.00112554
c94601_g1	L-aspartate chloroplastic	4.7826	18.9626	1.33308e-05	0.00113718
c93974_g2	F-box SKIP23-like///glutamate receptor -like	3.6539	18.8028	1.44953e-05	0.00123075
c82199_g2	ethylene-responsive transcription factor ERF062///ethylene-responsive transcription factor ERF062-like	1.02306	18.6922	1.53608e-05	0.00129817
c71533_g1	auxin-induced 15A///SAUR-like auxin-responsive family	1.46006	18.5711	1.63684e-05	0.00137692
c83751_g1	transient receptor potential cation channel subfamily A member 1 homolog///ankyrin repeat-containing At5g02620-like	2.67933	18.5531	1.65238e-05	0.00138358
c92835_g3	ABC transporter G family member 29-like	2.6125	18.4977	1.70106e-05	0.00141781
c82490_g5	---NA---	4.27308	18.4652	1.73039e-05	0.00143567
c86244_g3	TBC domain-containing///TBC1 domain family member 15///TBC1 domain family member 15 isoform X1	3.86213	18.392	1.79813e-05	0.00148509
c77794_g4	glutathione S-transferase F13	4.83415	18.3424	1.84549e-05	0.00151337
c88066_g6	rotamase FKBP 1	1.5799	18.3388	1.84903e-05	0.00151337
c72636_g6	probable WRKY transcription factor 69	1.03946	18.318	1.86928e-05	0.00152309
c73891_g1	disease resistance RGA1 isoform X1	0.407102	18.2958	1.89119e-05	0.00153406
c79430_g7	MADS-box 3///MADS-box transcription factor 6	3.83366	18.153	2.03844e-05	0.00164615
c93341_g3	S-acyltransferase 8-like	4.46638	18.1016	2.0943e-05	0.00168378
c76485_g1	Inter-alpha-trypsin inhibitor heavy chain H3	9.9151	18.0782	2.12018e-05	0.00168964
c76851_g8	Homeobox-leucine zipper ATHB-54	4.71743	18.0821	2.11586e-05	0.00168964
c76888_g3	disease resistance RGA2-like	0.993859	18.0357	2.16806e-05	0.00171277
c90657_g1	probable helicase MAGATAMA 3 isoform X1///probable helicase MAGATAMA 3 isoform X2	1.43762	18.0387	2.16463e-05	0.00171277
c86251_g1	ARM repeat superfamily isoform 3///U-box domain-containing 4	6.1278	17.9764	2.23659e-05	0.00175925
c75946_g1	hypothetical protein BVRB_4g076240	1.55554	17.9442	2.27478e-05	0.00178158
c61692_g2	PREDICTED: uncharacterized protein LOC104890366	4.34137	17.9147	2.31034e-05	0.00180167
c91049_g1	PREDICTED: uncharacterized protein LOC104908122///serine threonine- phosphatase 7 long form homolog///PREDICTED: uncharacterized protein LOC104878132	1.46574	17.8556	2.38318e-05	0.00185053
c90065_g4	pentatricopeptide repeat-containing At5g56310	3.2302	17.8473	2.3936e-05	0.00185071
c92326_g2	DNA binding	7.05365	17.8197	2.42862e-05	0.00186983
c88814_g1	receptor kinase At4g00960///cysteine-rich receptor kinase 10	4.44419	17.7332	2.54154e-05	0.00194851
c71665_g14	retroelement pol poly	3.01415	17.7101	2.57262e-05	0.00196405
c57052_g2	umecyanin-like	-0.324353	17.6048	2.71898e-05	0.00206177
c84040_g1	Iojap- mitochondrial	6.03396	17.6018	2.72331e-05	0.00206177
c73514_g3	B-zip transcription factor	4.75202	17.5684	2.77158e-05	0.0020752
c77889_g1	cytochrome P450 734A1-like	1.59684	17.5658	2.77531e-05	0.0020752
c90685_g1	PREDICTED: uncharacterized protein LOC104901027///PREDICTED: uncharacterized protein LOC104896593///retrotransposon unclassified	2.75331	17.5719	2.7665e-05	0.0020752
c88183_g1	MAP3K-like kinase	1.63484	17.4401	2.96499e-05	0.00220795
c77866_g2	chloroplastic-like	5.48937	17.3613	3.09052e-05	0.00229203
c81049_g5	pyrophosphate--fructose 6-phosphate 1-phosphotransferase subunit beta	4.56649	17.2449	3.28581e-05	0.00242695
c83966_g1	subfamily C member 2///RADIALIS-like 2	6.12288	17.097	3.55184e-05	0.00261283
c75336_g2	dnaJ homolog	4.2072	17.0566	3.62818e-05	0.00265717
c79135_g2	40S ribosomal SA-like	6.91741	17.0497	3.64136e-05	0.00265717
c78672_g1	glutamate receptor -like	4.94894	17.0093	3.71967e-05	0.00269268
c90646_g1	PREDICTED: uncharacterized protein LOC104899180///PREDICTED: uncharacterized protein LOC104211089	0.0881521	17.0158	3.70691e-05	0.00269268
c93848_g3	disease resistance RGA1///disease resistance RGA2-like	1.15818	16.9436	3.85062e-05	0.00277642
c94135_g3	beta-galactosidase 13-like	0.131559	16.8684	4.00633e-05	0.00287727
c93139_g1	ABC transporter G family member 35-like///ABC transporter G family member 29-like	3.48991	16.8347	4.07814e-05	0.00291731
c92231_g9	retroelement pol poly	2.99634	16.8125	4.12612e-05	0.00294006
c82188_g4	serine threonine- phosphatase 7 long form homolog	4.11088	16.7774	4.20319e-05	0.00298328
c87279_g3	PREDICTED: uncharacterized protein LOC100846199	3.2492	16.7341	4.3001e-05	0.00304019
c74501_g15	trichome birefringence-like 38	0.299341	16.7207	4.33057e-05	0.00304986
c64759_g1	peroxidase 5-like	2.4457	16.6726	4.44182e-05	0.00311614
c93132_g4	SAFB-like transcription modulator	1.09567	16.6349	4.53091e-05	0.00316641
c85867_g2	blue copper -like	2.92931	16.614	4.58106e-05	0.00318919
c74418_g1	Retrotransposon gag///PREDICTED: uncharacterized protein LOC104899463///PREDICTED: uncharacterized protein LOC104892661///PREDICTED: uncharacterized protein LOC104903465	1.98437	16.5882	4.6438e-05	0.00322053
c81361_g4	U3 small nucleolar RNA-associated 25-like isoform X1	2.9298	16.5727	4.68211e-05	0.00323475
c82578_g1	trichome birefringence-like 36	5.25172	16.4843	4.90547e-05	0.00337622
c69290_g1	probable indole-3-acetic acid-amido synthetase	5.6656	16.4588	4.97182e-05	0.00340898
c87929_g1	hypothetical protein M569_06648	-0.170237	16.3094	5.37965e-05	0.0036625
c95149_g1	cysteine-rich receptor-kinase///cysteine-rich receptor kinase 10	1.65499	16.3086	5.38188e-05	0.0036625
c90119_g1	60 kDa jasmonate-induced -like	2.74478	16.2918	5.42982e-05	0.00368133
c77856_g2	rotamase FKBP 1	2.77933	16.2566	5.53172e-05	0.00371309
c80357_g3	peptidyl-prolyl cis-trans FKBP-type///hypothetical protein SOVF_126030	3.79846	16.2544	5.53796e-05	0.00371309
c83704_g6	---NA---	1.10384	16.2644	5.50899e-05	0.00371309
c83613_g2	cycloartenol-C-24-methyltransferase///Sterol methyltransferase 1	6.88386	16.1668	5.80025e-05	0.00387465
c85104_g3	retrotransposon like	1.61454	16.0568	6.14692e-05	0.00409119
c93362_g1	Cytochrome family subfamily polypeptide 1 isoform 1	1.94417	15.8714	6.7796e-05	0.00449582
c88721_g2	23 kDa jasmonate-induced -like	7.16429	15.8375	6.90205e-05	0.00456037
c81383_g1	nuclease HARBI1	1.58786	15.8183	6.97255e-05	0.00459026
c72595_g1	hypothetical protein BVRB_007360	2.28214	15.7782	7.12189e-05	0.00467165
c78472_g1	auxin-responsive IAA9	7.44515	15.7606	7.18826e-05	0.00469822
c68850_g1	HVA22 c	3.59711	15.742	7.2594e-05	0.00472772
c90047_g3	Smr domain-containing	3.61765	15.6815	7.49536e-05	0.00486395
c85020_g2	uncharacterized membrane At1g06890	4.2859	15.6598	7.58171e-05	0.00490248
c77620_g3	shaggy-related kinase eta isoform X1///shaggy-related kinase zeta isoform X2	5.96383	15.5792	7.91196e-05	0.00506198
c87540_g2	peroxidase 3-like	5.01312	15.5892	7.87041e-05	0.00506198
c88588_g1	probable disease resistance At1g58602 isoform X1	3.2778	15.5856	7.88525e-05	0.00506198
c82525_g2	nucleosome assembly 1 1-like///nucleosome assembly 1 2-like	1.57112	15.5559	8.01026e-05	0.00510689
c78118_g2	40S ribosomal S11///40S ribosomal S11-like	8.18192	15.5338	8.10413e-05	0.00514867
c77816_g2	transcription factor HBI1	3.87756	15.502	8.24193e-05	0.00521798
c80479_g2	Spectrin beta brain 3///PREDICTED: uncharacterized protein LOC104900320	6.71078	15.44	8.51667e-05	0.00537319
c88068_g1	Magnesium transporter -like family isoform 1	2.18383	15.4313	8.55612e-05	0.0053794
c75101_g1	A-kinase anchor 17A	3.47677	15.3696	8.84004e-05	0.00553874
c84429_g1	PREDICTED: uncharacterized protein LOC103343557///PREDICTED: uncharacterized protein LOC101212789///uncharacterized LOC100194135	3.19	15.361	8.88035e-05	0.00554272
c87641_g2	alpha-amylase partial	5.54572	15.3552	8.9074e-05	0.00554272
c72246_g1	PREDICTED: uncharacterized protein LOC104901296	1.59536	15.339	8.9842e-05	0.00557143
c83149_g1	hypothetical protein SOVF_100430	0.0897895	15.3156	9.09599e-05	0.00562157
c82729_g3	PREDICTED: uncharacterized protein LOC104893474	2.16475	15.2922	9.20957e-05	0.00567247
c90517_g3	PREDICTED: uncharacterized protein LOC104898717	0.440904	15.2528	9.40382e-05	0.00577255
c91377_g2	Lactoylglutathione lyase glyoxalase I family	5.99463	15.2174	9.58152e-05	0.00586182
c84998_g1	ETHYLENE INSENSITIVE 3-like	0.351134	15.1874	9.73524e-05	0.00593588
c78224_g1	PREDICTED: uncharacterized protein LOC104889602	1.89937	15.1741	9.80408e-05	0.00595787
c80036_g2	FAR-RED IMPAIRED RESPONSE 1 isoform X1	5.52272	15.1563	9.89683e-05	0.00599418
c80670_g2	probable LRR receptor-like serine threonine- kinase At4g36180///histone-lysine N-methyltransferase ASHR3	6.90478	15.1447	9.95779e-05	0.00601106
c71434_g1	protease Do-like 14 isoform X1	4.09332	15.1143	0.000101192	0.00605941
c81779_g4	transposon Mutator sub-class///PREDICTED: uncharacterized protein LOC104886359	3.23938	15.1042	0.000101739	0.00605941
c82322_g3	protease Do-like 14 isoform X1	3.86987	15.0985	0.000102046	0.00605941
c89395_g1	solute carrier family 25 member 44-like	4.36013	15.1207	0.00010085	0.00605941
c94684_g3	probable leucine-rich repeat receptor kinase At5g49770	1.62749	15.101	0.00010191	0.00605941
c93624_g1	peptidyl-prolyl cis-trans isomerase FKBP8-like	1.34642	15.0789	0.000103111	0.0061027
c91126_g14	retroelement pol poly	1.96555	15.0609	0.000104097	0.00614105
c83415_g2	cyclin-D4-1-like///carboxy-terminal domain cyclin	5.86093	15.0267	0.000105999	0.00623304
c77700_g4	hypothetical protein SOVF_106270///hypothetical protein POPTR_0001s47070g	3.18788	14.9997	0.000107528	0.00630252
c76043_g1	ubiquinol oxidase mitochondrial-like///ubiquinol oxidase mitochondrial	4.18503	14.9648	0.000109537	0.00639961
c87270_g2	probable phosphatase 2C 25	5.86315	14.9432	0.000110799	0.0064526
c79992_g3	GRIP1-associated 1///coiled-coil domain-containing SCD2	6.84883	14.9106	0.00011273	0.00654408
c77843_g6	pectinesterase-like	2.04832	14.8829	0.000114396	0.00661964
c81225_g1	ribonuclease H At1g65750	2.43002	14.8665	0.000115393	0.00665518
c83470_g1	acyl- --sterol O-acyltransferase 1-like	1.40164	14.8608	0.000115742	0.00665518
c80576_g1	ATP-citrate synthase beta chain 2	2.87009	14.8174	0.00011844	0.00678884
c71920_g1	cold shock domain-containing 3-like	2.72307	14.8085	0.000118995	0.0067992
c83719_g3	DNA (cytosine-5)-methyltransferase DRM2-like	6.40993	14.7912	0.000120097	0.00683405
c86798_g2	iron-sulfur cluster assembly 1-like	6.11976	14.7871	0.000120358	0.00683405
c76328_g5	disease resistance RGA3	1.46708	14.7768	0.000121018	0.00685013
c73102_g1	Retrovirus-related Pol poly from transposon TNT 1-94///GATA zinc finger domain-containing 14-like	2.03023	14.7405	0.000123367	0.0069614
c84507_g2	PREDICTED: uncharacterized protein LOC102593226///PREDICTED: uncharacterized protein LOC101254987///PREDICTED: uncharacterized protein LOC101244044	1.25412	14.7301	0.000124051	0.00697838
c79369_g11	NADH dehydrogenase subunit B///NADH dehydrogenase subunit 2 (chloroplast)	1.23365	14.7165	0.000124948	0.00700713
c68828_g1	hypothetical protein SOVF_100620	7.01877	14.6343	0.00013052	0.0072971
c74244_g1	SQUINT family	4.0519	14.6054	0.000132535	0.00738699
c86823_g1	BAG family molecular chaperone regulator 6	2.96843	14.5853	0.000133954	0.00744324
c93069_g4	pentatricopeptide repeat-containing At5g56310-like	3.74335	14.5695	0.000135085	0.0074832
c69641_g2	tRNA (uracil(54)-C(5))-methyltransferase homolog-B	5.15839	14.5233	0.00013844	0.00764576
c87156_g1	catalytic Zinc CCHC- Peptidase///catalytic region Zinc CCHC-type Peptidase catalytic	1.59267	14.5065	0.000139679	0.00769082
c81725_g2	probable receptor kinase At1g67000	-0.0906507	14.4992	0.000140216	0.00769706
c70896_g1	ATP-dependent zinc metalloprotease FTSH chloroplastic///ATP-dependent zinc metalloprotease FTSH chloroplastic-like	2.6396	14.438	0.000144848	0.00790357
c84204_g2	acidic endochitinase-like	0.614565	14.4414	0.000144585	0.00790357
c113453_g1	E3 ubiquitin- ligase SINA-like 10 isoform X4	1.65809	14.4311	0.00014538	0.00790884
c93899_g3	folic acid synthesis fol1-like isoform X1///folic acid synthesis fol1///Folic acid synthesis fol1	4.22295	14.3927	0.000148378	0.00804785
c79222_g1	PREDICTED: titin-like///---NA---	2.98064	14.3808	0.000149316	0.00807464
c85570_g7	uncharacterized LOC102580903	4.12563	14.351	0.000151699	0.00817912
c86286_g2	cytochrome P450 family 71///cytochrome P450 71A26-like///cytochrome P450 71A22-like	2.51589	14.2818	0.000157378	0.00846022
c83993_g1	probable N-acetyltransferase HLS1	3.61129	14.2568	0.00015948	0.00854791
c89859_g1	phosphatidylinositol 4-kinase gamma 8-like	1.43869	14.2151	0.000163053	0.00871375
c65491_g1	subtilisin-like protease	5.03821	14.1858	0.000165619	0.00882493
c57624_g2	UDP-glucosyltransferase family///7-deoxyloganetin glucosyltransferase-like	3.08093	14.1728	0.000166761	0.00885977
c68954_g1	probable rhamnogalacturonate lyase B///rhamnogalacturonate lyase	-0.261795	14.1204	0.00017147	0.00905699
c83397_g4	cysteine ase inhibitor-like///cysteine ase inhibitor 6	4.2483	14.1224	0.000171289	0.00905699
c78908_g1	---NA---	5.77413	14.031	0.000179819	0.00947046
c78713_g5	F-box kelch-repeat At3g23880-like	3.26453	14.0083	0.000182001	0.00955769
c77781_g2	Rab5-interacting family///hypothetical protein SOVF_185120	3.27935	13.9602	0.000186718	0.00977715
c92119_g2	60S ribosomal L3-2-like	6.28821	13.9431	0.000188428	0.0098383
c81667_g1	transmembrane 45B-like	4.75099	13.9261	0.000190141	0.00989934
c63322_g1	dnaJ homolog subfamily B member 1-like	4.36743	13.8969	0.000193114	0.0100254
c94055_g1	isoform 1///hypothetical protein SOVF_195260	5.12671	13.8834	0.000194507	0.0100689
c88269_g2	PREDICTED: uncharacterized protein LOC104898791	2.85951	13.8442	0.000198612	0.0102522
c77128_g2	PREDICTED: uncharacterized protein LOC104899180	-0.194413	13.8345	0.000199638	0.010276
c86224_g2	probable phosphatase 2C 14	4.50224	13.8035	0.000202953	0.0104171
c94452_g1	---NA---	1.95611	13.7793	0.000205586	0.0105225
c77617_g5	serine threonine- kinase CDL1-like isoform X2///serine threonine- kinase CDL1-like	4.81305	13.7667	0.000206967	0.0105339
c92429_g1	serine carboxypeptidase-like 18///serine carboxypeptidase-like 18 isoform X1	2.19568	13.7679	0.000206841	0.0105339
c87131_g2	replication factor-A///replication A 70 kDa DNA-binding subunit C-like	0.763108	13.7444	0.000209446	0.0105936
c90136_g1	probable WRKY transcription factor 15 isoform X2	4.78651	13.7428	0.00020962	0.0105936
c93461_g7	ABC transporter C family member 14-like isoform X1	2.90694	13.7404	0.000209889	0.0105936
c93897_g4	cyclin delta-1 family	3.52455	13.7301	0.000211043	0.0106223
c81307_g3	PREDICTED: uncharacterized protein LOC104902539 isoform X2	4.82176	13.7113	0.000213164	0.0106994
c84979_g3	---NA---	3.96141	13.6854	0.000216129	0.0108184
c87832_g1	valine--tRNA mitochondrial isoform X1///valine--tRNA mitochondrial isoform X4	6.04465	13.6648	0.000218514	0.0109034
c92365_g1	serine threonine- phosphatase 6 regulatory ankyrin repeat subunit B-like	0.548465	13.6604	0.000219028	0.0109034
c67550_g1	---NA---	1.35455	13.6268	0.000222981	0.0110699
c74145_g3	NAC transcription factor ONAC010-like	0.0106069	13.5819	0.000228381	0.011307
c71974_g2	glucan endo-1,3-beta-glucosidase 8	1.77362	13.5566	0.000231482	0.011337
c77142_g1	NHL repeat-containing family///NHL domain-containing isoform 3///NHL domain-containing isoform 2///NHL domain-containing isoform 1	5.33256	13.5647	0.000230483	0.011337
c77665_g1	disease resistance RPP13 1	0.834523	13.5683	0.000230037	0.011337
c81720_g1	60S ribosomal L7-2-like///60S ribosomal L7-2	6.51257	13.5586	0.000231227	0.011337
c70970_g1	exopolygalacturonase-like	0.578926	13.5196	0.000236085	0.0115313
c80598_g2	delta(7)-sterol-C5(6)-desaturase-like///WD repeat-containing WRAP73 isoform X1	5.91003	13.4945	0.000239262	0.0116241
c80745_g3	acyl- synthetase 5///4-coumarate-- ligase-like 1	5.67849	13.4961	0.000239058	0.0116241
c85861_g1	notchless homolog	3.8499	13.4881	0.000240083	0.0116328
c81383_g2	---NA---	1.84528	13.4779	0.000241388	0.0116649
c91351_g3	probable mediator of RNA polymerase II transcription subunit 37c///heat shock cognate 70 kDa///heat shock cognate 70 kDa -like	1.15938	13.4687	0.000242577	0.0116913
c82664_g3	spermidine synthase 1	8.43138	13.4233	0.000248512	0.0119457
c94267_g2	subtilisin-like protease///subtilisin precursor family///CO(2)-response secreted protease///CO(2)-response secreted protease-like	5.66289	13.4155	0.000249553	0.0119641
c90194_g1	pentatricopeptide repeat-containing mitochondrial-like	5.4319	13.3873	0.000253331	0.0121132
c71378_g2	serine threonine- phosphatase 7 long form homolog	1.52331	13.3647	0.000256402	0.0121748
c72092_g1	ras-related RABD1	7.68493	13.3635	0.000256564	0.0121748
c73591_g3	---NA---	1.66344	13.3547	0.000257781	0.0121748
c90943_g1	hyoscyamine 6-dioxygenase-like///2 -deoxymugineic-acid 2 -dioxygenase-like	4.21505	13.3533	0.000257969	0.0121748
c92256_g1	laccase-17-like	4.0526	13.3536	0.000257928	0.0121748
c78076_g5	NRT1 PTR FAMILY///NRT1 PTR FAMILY -like	1.63175	13.3222	0.000262288	0.01222
c80166_g1	fasciclin-like arabinogalactan 21	7.25241	13.3246	0.000261946	0.01222
c87065_g3	ROOT HAIR DEFECTIVE 3-like	3.43246	13.3402	0.00025978	0.01222
c92483_g1	serine threonine- phosphatase 6 regulatory ankyrin repeat subunit A-like isoform X1///ankyrin repeat-containing At3g12360-like	1.71275	13.331	0.000261049	0.01222
c94293_g1	hypothetical protein SOVF_170270	4.20615	13.331	0.000261059	0.01222
c92552_g1	ent-kaurenoic acid oxidase 2-like///cytochrome P450 family 90	2.50968	13.2911	0.000266668	0.0123922
c86417_g2	PREDICTED: uncharacterized protein LOC104887889 isoform X3///(S)-coclaurine N-methyltransferase isoform X4///(S)-tetrahydroprotoberberine N-methyltransferase isoform X4///hypothetical protein SOVF_178870///Cyclopropane-fatty-acyl-phospholipid synthase isoform 1	5.59237	13.2722	0.000269375	0.0124543
c89517_g1	probable leucine-rich repeat receptor kinase At5g49770	1.22133	13.2752	0.000268942	0.0124543
c82195_g1	---NA---///osmotic avoidance abnormal 3	1.6584	13.2531	0.000272124	0.0125495
c79399_g2	---NA---///AC034258_20 helicase///PIF1 DNA helicase replication A1	0.822241	13.2351	0.000274762	0.0126072
c92475_g5	peptidyl-prolyl cis-trans isomerase FKBP16- chloroplastic///peptidyl-prolyl cis-trans isomerase FKBP16- chloroplastic-like isoform X1	6.18918	13.2358	0.000274657	0.0126072
c73920_g5	serrate RNA effector molecule-like///---NA---	0.449652	13.1705	0.000284387	0.0130159
c51966_g1	ribonuclease H At1g65750	0.614428	13.1059	0.000294368	0.0133658
c73612_g10	ATP-dependent DNA helicase PIF1-like	0.777162	13.1083	0.000293997	0.0133658
c81014_g3	cysteine synthase	5.29799	13.115	0.000292938	0.0133658
c91947_g5	---NA---	3.28435	13.102	0.000294975	0.0133658
c79155_g5	WUSCHEL-related homeobox 9-like isoform X1	0.639033	13.0912	0.000296679	0.0134075
c91938_g1	probable beta-1,4-xylosyltransferase IRX9	5.07306	13.0869	0.00029737	0.0134075
c89611_g3	nucleolin-like isoform X2	5.51984	13.0326	0.000306109	0.0137673
c83131_g4	disease resistance	2.7776	13.0165	0.000308763	0.0138524
c76069_g1	FAR1-RELATED SEQUENCE 6-like///FAR1-RELATED SEQUENCE 5-like	1.35223	12.9988	0.000311694	0.0139494
c85022_g3	retrotransposon like	0.698512	12.9812	0.000314633	0.0140464
c88242_g1	aspartic ase Asp1 isoform X2	3.79602	12.9667	0.000317078	0.0141209
c69296_g3	hypothetical protein SOVF_173920	2.93143	12.9572	0.000318696	0.0141582
c82977_g1	zinc finger BED domain-containing RICESLEEPER 2-like	4.00262	12.9491	0.000320074	0.0141847
c81613_g2	anthocyanidin 5,3-O-glucosyltransferase-like	5.03349	12.9316	0.000323081	0.0142832
c16035_g1	unnamed protein product	0.164622	12.8824	0.000331691	0.0144183
c68413_g1	hypothetical protein SOVF_022770	2.31959	12.9052	0.000327663	0.0144183
c71126_g13	PREDICTED: uncharacterized protein LOC104905839	0.210915	12.8862	0.000331018	0.0144183
c79286_g1	probable polyamine oxidase 2	2.0938	12.8946	0.000329531	0.0144183
c79862_g7	beta-galactosidase 13-like	1.93348	12.8872	0.000330832	0.0144183
c85647_g1	hypothetical protein SOVF_174050///isoform 1	7.01875	12.9018	0.000328269	0.0144183
c87991_g6	PREDICTED: uncharacterized protein LOC104236210	0.328712	12.892	0.000329982	0.0144183
c88150_g2	AC069473_8 gypsy Ty-3 retroelement poly 69905-74404///transposon Tf2-1 poly isoform X1	1.48798	12.8754	0.000332934	0.0144377
c79591_g1	calmodulin 3	0.257875	12.8687	0.000334131	0.0144551
c83914_g2	tropinone reductase homolog At1g07440-like	3.78949	12.8626	0.000335212	0.0144675
c75189_g1	hAT family dimerisation domain containing///PREDICTED: uncharacterized protein LOC104884024	3.60335	12.8402	0.000339251	0.0146071
c74347_g2	FAR1-RELATED SEQUENCE 5-like	1.81092	12.7916	0.00034817	0.0149557
c87293_g7	heat shock cognate 70 kDa -like///heat shock cognate 70 kDa 2-like///probable mediator of RNA polymerase II transcription subunit 37c	0.280529	12.7795	0.00035044	0.0150143
c94776_g1	subtilisin-like protease	8.06959	12.7755	0.000351187	0.0150143
c73078_g3	PREDICTED: uncharacterized protein LOC104900182	3.6948	12.7618	0.000353774	0.0150894
c75268_g2	formimidoyltransferase-cyclodeaminase-like isoform X1	6.66446	12.7164	0.000362459	0.0151748
c76107_g15	disease resistance RGA1	0.897621	12.742	0.000357538	0.0151748
c77316_g3	B3 domain-containing Os01g0234100-like///B3 domain-containing Os01g0234100-like isoform X1	1.1603	12.7177	0.000362207	0.0151748
c80167_g4	UPF0503 chloroplastic-like	5.62239	12.7313	0.000359585	0.0151748
c87061_g8	PREDICTED: uncharacterized protein LOC104895084 isoform X2///hypothetical protein SOVF_018550	2.60344	12.7343	0.000359012	0.0151748
c88310_g3	NADH dehydrogenase (ubiquinone) complex assembly factor 6	0.933671	12.7335	0.000359162	0.0151748
c88460_g1	Pentatricopeptide repeat (PPR) superfamily isoform 2	4.77362	12.7167	0.000362412	0.0151748
c91194_g1	gibberellin induced	8.53044	12.7289	0.000360043	0.0151748
c69704_g1	cytochrome b5 isoform A	4.26523	12.7076	0.000364175	0.0152024
c70363_g1	serendip2	5.13285	12.7044	0.000364792	0.0152024
c77254_g1	PREDICTED: uncharacterized protein LOC104896312 isoform X1	0.418522	12.6887	0.000367867	0.0152606
c83927_g6	PREDICTED: uncharacterized protein LOC104230578	-0.288939	12.6927	0.000367093	0.0152606
c95068_g1	acidic mammalian chitinase-like	5.09188	12.6818	0.000369234	0.0152824
c85149_g1	hypothetical protein BVRB_7g163560	0.748333	12.6474	0.000376093	0.0155309
c75217_g1	GDSL-like lipase acylhydrolase///GDSL esterase lipase At3g26430-like	0.998555	12.6194	0.00038176	0.0156229
c83365_g2	PREDICTED: uncharacterized protein LOC104883796///LINE-1 retrotransposable element ORF2///PREDICTED: uncharacterized protein LOC104890388///PREDICTED: uncharacterized protein LOC104105592	2.54844	12.6218	0.000381267	0.0156229
c84310_g1	germin subfamily 1 member 1	2.6298	12.6294	0.000379734	0.0156229
c89751_g1	neutral invertase	6.73837	12.6205	0.000381547	0.0156229
c74392_g2	ATPase plasma membrane-type-like///plasma membrane atpase 1///plasma membrane H+ ATPase	2.29808	12.6017	0.000385402	0.0156425
c90252_g2	poly	0.852589	12.6066	0.000384394	0.0156425
c93731_g1	cytochrome P450 94B3///cytochrome family subfamily polypeptide 3	2.61816	12.6003	0.000385682	0.0156425
c95144_g4	CDT1 chloroplastic	4.84492	12.6094	0.000383819	0.0156425
c91483_g1	probable nucleoredoxin 1	3.56626	12.59	0.000387821	0.0156942
c72373_g1	phytochelatin synthetase family	-0.087985	12.5763	0.000390668	0.0157494
c81492_g1	epoxide hydrolase 3	0.897033	12.5751	0.000390919	0.0157494
c73984_g5	PREDICTED: uncharacterized protein LOC102583312///transposon En Spm sub- expressed	1.59057	12.5548	0.000395189	0.0158863
c86184_g4	MLP 43	5.1118	12.5327	0.000399894	0.0160046
c93788_g4	kinesin NACK1	6.12335	12.5348	0.000399446	0.0160046
c90556_g1	protease Do-like chloroplastic	4.39197	12.5028	0.000406345	0.016227
c83044_g1	benzyl alcohol O-benzoyltransferase-like	2.3819	12.4964	0.000407731	0.0162467
c80532_g5	cytochrome b5 isoform E///cytochrome b5-like heme steroid-binding domain	6.32289	12.462	0.000415314	0.0164765
c94531_g2	lysine-specific demethylase JMJ25-like	5.11699	12.4621	0.000415283	0.0164765
c79115_g1	auxin transporter 3	3.88193	12.4548	0.000416913	0.016504
c82625_g4	TIFY 10A	8.40454	12.4319	0.000422061	0.0166312
c84637_g2	PREDICTED: uncharacterized protein LOC104892028///PREDICTED: uncharacterized protein LOC104886664	0.944168	12.4283	0.000422875	0.0166312
c88539_g5	alkaline neutral invertase CINV2-like	2.86774	12.4316	0.000422134	0.0166312
c73467_g2	---NA---	0.682049	12.4222	0.000424253	0.0166494
c73653_g7	hypothetical protein BVRB_5g113070	2.45199	12.4179	0.000425236	0.016652
c85141_g1	calcineurin B 1	0.264479	12.3826	0.000433342	0.016933
c70611_g2	uncharacterized mitochondrial g00810-like	0.33437	12.3763	0.000434817	0.0169541
c76312_g1	PREDICTED: uncharacterized protein LOC104893474	2.2075	12.3643	0.000437618	0.0170268
c63932_g1	DEDDy 3 -5 exonuclease domain-containing	2.00164	12.3545	0.000439934	0.0170439
c87188_g10	PREDICTED: uncharacterized protein LOC104899363///PREDICTED: uncharacterized protein LOC104886889///retroelement pol poly -like///PREDICTED: uncharacterized protein LOC104894399///hypothetical protein///probable pectinesterase pectinesterase inhibitor 13	2.93712	12.3571	0.000439321	0.0170439
c87779_g2	RING-H2 finger ATL60-like	1.29402	12.3345	0.00044467	0.0171908
c86607_g1	monothiol glutaredoxin-S1-like	-0.176408	12.3241	0.000447156	0.0172502
c83462_g1	hypothetical protein SOVF_091060 isoform B///hypothetical protein SOVF_091060 isoform A///PREDICTED: uncharacterized protein LOC103320283 isoform X1	3.4453	12.2652	0.00046148	0.017765
c76657_g5	retroelement pol poly	1.62092	12.2482	0.000465711	0.0178522
c82962_g3	transcription factor HBI1	2.89657	12.2504	0.000465147	0.0178522
c84389_g5	probable adenylate kinase mitochondrial	6.37566	12.2276	0.00047088	0.0180025
c84553_g1	pectinesterase pectinesterase inhibitor 28	2.65331	12.2247	0.000471613	0.0180025
c86659_g5	hypothetical protein BVRB_5g104790///AC025782_3 Ty1 copia-element poly	4.54838	12.2184	0.000473212	0.0180257
c78173_g11	thioredoxin CXXS1	2.77594	12.1973	0.000478586	0.0180413
c78682_g1	mitochondrial isoform X1	0.452239	12.1979	0.000478441	0.0180413
c82219_g2	inositol transporter 4-like	2.67122	12.2	0.00047789	0.0180413
c83082_g1	NAC domain-containing 89-like isoform X1///NAC domain-containing 89	3.20981	12.2028	0.000477168	0.0180413
c87407_g4	ribose-phosphate pyrophosphokinase mitochondrial	2.05264	12.2073	0.00047603	0.0180413
c90835_g3	hypothetical protein BVRB_7g164140	2.88908	12.1771	0.000483806	0.0182003
c73612_g3	catalytic Zinc CCHC- Peptidase	-0.0352727	12.1608	0.000488033	0.0182639
c77785_g3	glycine-rich RNA-binding mitochondrial	5.6455	12.1574	0.000488924	0.0182639
c83602_g2	cysteine-rich repeat secretory 12	1.84833	12.1586	0.000488628	0.0182639
c85530_g1	tubulin alpha-3 chain-like///tubulin alpha-3 chain	6.14616	12.1552	0.000489516	0.0182639
c74455_g1	flavonol synthase flavanone 3-hydroxylase-like	2.96172	12.1251	0.00049749	0.0184855
c86635_g4	probable inactive poly [ADP-ribose] polymerase SRO5	2.07126	12.1266	0.00049708	0.0184855
c82729_g4	F-box At5g07610-like isoform X1	0.159327	12.1015	0.000503815	0.0186823
c76328_g2	disease resistance RGA3	-0.276149	12.0927	0.000506201	0.0187325
c90373_g3	GATA zinc finger domain-containing 14-like	-0.279232	12.0472	0.000518713	0.0191565
c77856_g1	peptidyl-prolyl cis-trans isomerase FKBP62	4.66031	12.0271	0.000524336	0.0193249
c65977_g1	transcription factor RF2b-like	0.890572	12.0181	0.000526878	0.0193793
c70365_g1	probable xyloglucan endotransglucosylase hydrolase 25///probable xyloglucan endotransglucosylase hydrolase 23	1.01606	12.0086	0.000529562	0.0194387
c90482_g6	pantoate--beta-alanine ligase///F-box SKIP23-like	4.27373	12.0015	0.000531566	0.0194729
c80978_g1	replication A 70 kDa DNA-binding subunit A-like///replication A 70 kDa DNA-binding subunit B-like///replication factor-A carboxy-terminal domain	0.574146	11.995	0.000533442	0.0195023
c81012_g2	F-box LRR-repeat At4g15060	2.66582	11.9348	0.000550959	0.0201022
c88673_g2	serine threonine- phosphatase 7 long form homolog	1.89431	11.9263	0.000553468	0.0201533
c87818_g3	peroxidase 9	6.46888	11.9191	0.000555616	0.0201911
c75806_g2	PREDICTED: uncharacterized protein LOC104891435///PREDICTED: uncharacterized protein LOC104896195///PREDICTED: uncharacterized protein LOC104898574	1.32064	11.9145	0.000556978	0.0202002
c50743_g1	ARF guanine-nucleotide exchange factor GNL2	1.35312	11.9018	0.000560791	0.0202642
c93194_g1	transcription factor MYC2-like	5.40321	11.9012	0.000560974	0.0202642
c76052_g1	multifunctional methyltransferase subunit TRM112 At1g22270	5.6491	11.8797	0.00056749	0.0204589
c80288_g1	serine threonine- kinase At5g01020	1.47576	11.857	0.000574448	0.0206687
c79904_g1	flavonol synthase flavanone 3-hydroxylase-like///feruloyl ortho-hydroxylase 2-like	2.28068	11.8478	0.000577308	0.0207306
c80999_g1	kDa class I heat shock -like	3.59171	11.8202	0.000585902	0.0209977
c73612_g2	Opie2 pol///copia-type pol poly	-0.444952	11.7999	0.000592336	0.0211574
c84974_g1	ubiquitin-like-specific protease 1A///FAR1-RELATED SEQUENCE 5-like///PREDICTED: uncharacterized protein LOC104892855	0.559803	11.7988	0.000592687	0.0211574
c125293_g1	peroxidase 5-like	1.3843	11.7913	0.000595094	0.0212017
c76599_g4	wall-associated receptor kinase 2-like	0.466136	11.7766	0.0005998	0.0213189
c86923_g1	peptidyl-prolyl cis-trans isomerase CYP18-1	5.01653	11.7737	0.00060073	0.0213189
c87627_g8	dnaJ homolog subfamily B member 3	5.06312	11.743	0.000610725	0.0216313
c107431_g1	PREDICTED: uncharacterized protein LOC104899550	0.614529	11.7231	0.000617296	0.021737
c77718_g1	OTU domain-containing At3g57810-like///OTU domain-containing At3g57810-like isoform X2	1.7204	11.729	0.000615348	0.021737
c81680_g2	hypothetical protein VITISV_015055///PREDICTED: uncharacterized protein LOC104892696	0.371355	11.7264	0.000616183	0.021737
c93286_g1	hypothetical protein SOVF_103330///PREDICTED: uncharacterized protein LOC104894296 isoform X1///PREDICTED: uncharacterized protein LOC104894296 isoform X3	5.44486	11.7129	0.000620671	0.0218135
c48852_g1	transcription factor bHLH30	3.42762	11.7003	0.000624892	0.0219195
c79421_g5	probable indole-3-acetic acid-amido synthetase	5.58303	11.6701	0.00063511	0.022235
c77301_g2	probable serine threonine- kinase DDB_G0278665	2.05505	11.6572	0.000639561	0.0223477
c80883_g2	---NA---	2.49249	11.6416	0.000644929	0.0224921
c50205_g1	Sorting nexin-13	3.28111	11.6248	0.000650792	0.0225977
c82456_g2	beta-glucosidase 46-like///glycosyl hydrolase family 1 family///glycoside hydrolase family 1	3.49791	11.6248	0.000650782	0.0225977
c82859_g2	polyadenylate-binding 2	6.98728	11.6222	0.00065169	0.0225977
c80493_g1	replication A 70 kDa DNA-binding subunit D-like	2.8006	11.5834	0.000665414	0.0229859
c84858_g4	ribonuclease P subunit p25	2.27877	11.5851	0.000664816	0.0229859
c87410_g5	cytochrome b-c1 complex subunit 8-like	5.49038	11.5223	0.000687651	0.0237089
c67968_g1	PREDICTED: uncharacterized protein LOC104887308///PREDICTED: uncharacterized protein LOC104755690	0.711903	11.4856	0.000701373	0.0241362
c76877_g1	F-box LRR-repeat At3g26922-like	5.44157	11.467	0.000708445	0.0242433
c86888_g1	isoform 1	5.13802	11.4717	0.000706656	0.0242433
c89679_g2	3-ketoacyl- synthase 12///3-ketoacyl- synthase 12-like	3.7722	11.4669	0.000708486	0.0242433
c65200_g1	germin 2-1	3.29151	11.4389	0.000719215	0.0244264
c75402_g2	PREDICTED: uncharacterized protein LOC104901083	3.45255	11.4404	0.000718647	0.0244264
c84760_g1	heptahelical transmembrane 1-like	4.89133	11.4446	0.000717014	0.0244264
c85472_g1	probable indole-3-acetic acid-amido synthetase///probable indole-3-acetic acid-amido synthetase -like isoform X1	-0.46226	11.4411	0.000718375	0.0244264
c88518_g1	poly	2.01051	11.4313	0.000722186	0.0244816
c70322_g1	glucan endo-1,3-beta-glucosidase-like	2.37434	11.3821	0.00074155	0.0250912
c92273_g3	PREDICTED: uncharacterized protein LOC104884717///PREDICTED: uncharacterized protein LOC104897695	0.0248464	11.3473	0.000755592	0.0255188
c89650_g2	deoxyribodipyrimidine photo-lyase	3.99768	11.3066	0.000772327	0.0259874
c94276_g2	chaperone mitochondrial	6.10339	11.3098	0.000770986	0.0259874
c84562_g6	Chalcone synthase	4.81238	11.2984	0.000775757	0.0260545
c93953_g1	BAG family molecular chaperone regulator 6	2.66221	11.277	0.000784751	0.026308
c79397_g2	WVD2-like 1	5.19853	11.2696	0.000787861	0.0263636
c75307_g8	AC034258_20 helicase///AT hook motif-containing	1.81965	11.2403	0.000800394	0.0265386
c79987_g1	omega-hydroxypalmitate O-feruloyl transferase	2.26011	11.2405	0.000800326	0.0265386
c81048_g1	mechanosensitive ion channel 10-like	-0.254569	11.242	0.000799651	0.0265386
c84578_g2	PREDICTED: uncharacterized protein LOC104892765 isoform X1///1-phosphatidylinositol-4,5-bisphosphate phosphodiesterase delta-1///PREDICTED: uncharacterized protein LOC104892765 isoform X2	4.31729	11.2447	0.000798507	0.0265386
c93330_g3	retrotransposon Ty1-copia subclass	0.197341	11.2489	0.000796705	0.0265386
c90847_g1	deoxynucleoside triphosphate triphosphohydrolase SAMHD1 homolog isoform X1///deoxynucleoside triphosphate triphosphohydrolase SAMHD1 homolog isoform X2	4.33383	11.2329	0.000803619	0.026597
c64806_g1	sugar transport 6-like///sugar transport 2	-0.580266	11.2209	0.000808802	0.0267199
c92727_g1	RING-finger ubiquitin ligase	5.01794	11.2062	0.000815244	0.0268838
c85572_g4	pectate lyase-like///pectate lyase	0.684249	11.2015	0.000817298	0.0269027
c87830_g2	PREDICTED: uncharacterized protein LOC104900444	-0.414251	11.1791	0.000827254	0.0271563
c90359_g2	60S ribosome subunit biogenesis NIP7 homolog///PREDICTED: uncharacterized protein LOC104893474///PREDICTED: uncharacterized protein LOC104899180	5.87982	11.1774	0.00082799	0.0271563
c65444_g1	TRNA--methyltransferase non-catalytic subunit trm6MTase subunit	4.47796	11.1514	0.000839696	0.0274412
c76911_g7	galactose oxidase-like	0.278771	11.1533	0.000838807	0.0274412
c85650_g1	galactose oxidase-like///probable sodium-coupled neutral amino acid transporter 6///sodium-coupled neutral amino acid transporter 7///galactose oxidase///sodium-coupled neutral amino acid transporter 5	1.74627	11.1359	0.000846723	0.0276211
c75020_g2	Nucleoporin isoform 1///nucleoporin GLE1	4.61931	11.1273	0.000850647	0.0276994
c94081_g1	peroxidase 5-like	3.54153	11.1224	0.000852902	0.0277231
c91605_g1	Gap junction beta-4 isoform 1	6.03471	11.1159	0.000855923	0.0277716
c77178_g3	F-box SKIP23-like	3.66128	11.0966	0.000864844	0.0280111
c82536_g3	60 kDa jasmonate-induced -like	2.82741	11.0767	0.000874192	0.0282132
c89539_g4	LINE-type retrotransposon LIb DNA	5.58852	11.0781	0.000873525	0.0282132
c73954_g2	disease resistance (CC-NBS-LRR class) family	0.380946	11.0719	0.000876467	0.0282365
c65382_g1	beta-amyrin 28-oxidase-like	2.3246	11.0581	0.000882991	0.0283462
c69843_g3	cucumisin-like	2.0461	11.0599	0.000882156	0.0283462
c79606_g9	---NA---	2.27725	11.0393	0.000892026	0.0285503
c80790_g3	O-glucosyltransferase rumi homolog	1.06304	11.0383	0.000892493	0.0285503
c54374_g2	endoglucanase 16	-0.274642	11.0271	0.000897913	0.0286733
c69990_g1	pollen-specific leucine-rich repeat extensin 1	1.07556	11.0216	0.000900575	0.0287044
c71687_g4	retroelement pol poly///retroelement pol poly -like	0.485779	11.0142	0.00090415	0.0287044
c74749_g11	retroelement pol poly///uncharacterized mitochondrial g00810-like	1.94613	11.0121	0.000905209	0.0287044
c79368_g2	THO complex subunit 4A///THO complex subunit 4A-like	7.23625	11.0155	0.000903538	0.0287044
c69012_g3	annexin D2-like	5.26463	11.0048	0.000908774	0.0287173
c74309_g1	probable receptor kinase At4g39110	1.33371	11.0054	0.000908479	0.0287173
c77220_g4	Uncharacterized protein TCM_032491///Sorting nexin-13	1.373	10.9874	0.000917342	0.0289377
c78079_g5	retrotransposon unclassified///retrovirus-related Pol poly from transposon TNT 1-94	2.03964	10.9781	0.000921935	0.0289819
c85602_g1	L-ascorbate oxidase homolog	2.69442	10.9804	0.000920814	0.0289819
c88520_g3	nuclear matrix constituent 1	4.52704	10.9584	0.000931798	0.0292414
c69589_g1	hypothetical protein SOVF_065510	3.8717	10.9536	0.000934202	0.0292663
c95086_g4	ankyrin repeat-containing At3g12360-like	8.29265	10.9339	0.000944223	0.0295293
c93703_g2	probable phosphatase 2C 52	4.49004	10.9084	0.000957283	0.0298863
c79906_g1	two-pore potassium channel 5-like///calcium-activated outward-rectifying potassium channel chloroplastic	5.04006	10.8879	0.000967933	0.030167
c69118_g1	DUF538 family	5.86312	10.8736	0.000975429	0.0302051
c83212_g2	SHI RELATED SEQUENCE 1	2.53369	10.8797	0.000972257	0.0302051
c87167_g3	isochorismatase hydrolase family///nicotinamidase 2///nicotinamidase 2-like	4.19731	10.8729	0.000975805	0.0302051
c87929_g2	PREDICTED: uncharacterized protein LOC104883482	0.168578	10.8752	0.000974628	0.0302051
c79364_g8	glucan endo-1,3-beta- basic isoform-like	1.29151	10.856	0.000984778	0.0303276
c80468_g5	zinc finger BED domain-containing RICESLEEPER 2-like	2.83168	10.857	0.000984216	0.0303276
c81536_g1	PROF1_ARTVU ame: Full=Profilin-1 ame: Full=Pollen allergen Art v ame: Allergen=Art v	5.65037	10.8528	0.000986439	0.0303276
c94918_g2	calmodulin 3	0.099703	10.8536	0.000986035	0.0303276
c72982_g1	U-box domain-containing 11	5.62551	10.8295	0.000998944	0.0305056
c82576_g2	scarecrow 15	3.99134	10.8382	0.000994247	0.0305056
c88497_g2	CBS domain-containing CBSX5-like	1.81077	10.8297	0.000998856	0.0305056
c94955_g3	anthocyanidin reductase	8.36525	10.8318	0.000997706	0.0305056
c73420_g1	Hop-interacting THI032///alanine glyoxylate aminotransferase	4.05519	10.8257	0.00100102	0.0305129
c84126_g1	probable inactive receptor kinase At1g27190	8.35939	10.8229	0.00100254	0.0305129
c89801_g3	Strong similarity to Zea mays retrotransposon Hopscotch poly (gb///retroelement pol poly -like	1.47531	10.797	0.00101666	0.030891
c69835_g2	transcription factor RAX3-like	4.01369	10.7779	0.00102719	0.0311588
c84790_g2	retroelement pol poly///PREDICTED: uncharacterized protein LOC104900409	3.04633	10.7647	0.00103453	0.0313247
c87061_g7	plant phospholipase///PREDICTED: uncharacterized protein LOC104895084 isoform X1	2.59848	10.7619	0.00103611	0.0313247
c75057_g2	peptidyl-prolyl cis-trans isomerase	3.8686	10.7523	0.0010415	0.0314352
c95079_g1	pentatricopeptide repeat-containing At1g60770	6.10324	10.7341	0.00105179	0.0316933
c71037_g2	probable inorganic phosphate transporter 1-4	1.83615	10.7114	0.00106478	0.0319391
c72228_g2	NRT1 PTR FAMILY -like	2.2792	10.7106	0.00106522	0.0319391
c80023_g10	omega-3 fatty acid chloroplastic-like///omega-3 fatty acid chloroplastic	7.1966	10.714	0.00106326	0.0319391
c94518_g3	E3 ubiquitin ligase DRIP2	5.58143	10.6906	0.00107683	0.032234
c78973_g2	PREDICTED: uncharacterized protein LOC104897530	6.09324	10.6734	0.0010869	0.0324819
c84542_g1	exopolygalacturonase-like	3.28934	10.6637	0.00109257	0.0325976
c76416_g1	glycerol-3-phosphate acyltransferase 1	2.76427	10.6483	0.00110172	0.0327514
c90065_g3	target of Myb 1-like	1.98016	10.6484	0.00110165	0.0327514
c91594_g2	gag-pol identical	0.951431	10.6459	0.00110313	0.0327514
c78116_g5	mitotic apparatus p62	3.61202	10.6342	0.00111015	0.0329061
c93334_g2	PREDICTED: uncharacterized protein LOC104896902///PREDICTED: uncharacterized protein LOC104899006///PREDICTED: uncharacterized protein LOC104908122	1.86313	10.609	0.00112537	0.0333029
c78975_g3	F-box FBD LRR-repeat At1g13570-like isoform X1	-0.109921	10.5939	0.00113461	0.0334009
c80883_g4	---NA---	2.71422	10.5924	0.00113555	0.0334009
c88811_g1	internal alternative NAD(P)H-ubiquinone oxidoreductase mitochondrial-like///internal alternative NAD(P)H-ubiquinone oxidoreductase mitochondrial///NAD(P)H dehydrogenase B2	5.78832	10.5916	0.00113604	0.0334009
c93679_g1	TIC chloroplastic	5.07891	10.5936	0.00113483	0.0334009
c72689_g3	Transcription factor HBP-1b(c1)///transcription factor HBP-1b(c38)	3.24907	10.5732	0.00114737	0.0336254
c83200_g2	NADH dehydrogenase [ubiquinone] iron-sulfur mitochondrial	3.04311	10.5756	0.00114589	0.0336254
c70493_g2	ribonuclease H At1g65750///hypothetical protein SOVF_206000	2.41882	10.5559	0.00115818	0.0338042
c81155_g1	hypothetical protein SOVF_170270	3.43282	10.5594	0.00115601	0.0338042
c93398_g3	amaranthin-like lectin	5.36543	10.5545	0.00115905	0.0338042
c61338_g1	PREDICTED: uncharacterized protein LOC104819104	2.35974	10.5328	0.00117276	0.0341491
c52779_g1	probable LRR receptor-like serine threonine- kinase RLK	0.205386	10.5065	0.00118953	0.0345269
c81382_g3	receptor-like cytosolic serine threonine- kinase RBK1	3.8315	10.5071	0.00118916	0.0345269
c75454_g1	hypothetical protein SOVF_088850	6.91436	10.492	0.00119895	0.0346894
c91636_g1	---NA---	1.71241	10.4931	0.00119819	0.0346894
c87259_g5	peroxidase 40-like///peroxidase 40	6.31839	10.4788	0.00120752	0.0348817
c25551_g1	PREDICTED: uncharacterized protein LOC104884460	0.523842	10.4677	0.00121481	0.0349906
c86712_g3	PREDICTED: uncharacterized protein LOC104909041///PREDICTED: uncharacterized protein LOC104883482///PREDICTED: uncharacterized protein LOC104907437	1.89195	10.4672	0.00121514	0.0349906
c66632_g1	probable pectinesterase pectinesterase inhibitor 21	2.78541	10.4483	0.00122762	0.0352384
c92223_g2	fe(2+) transport 1-like	0.667119	10.4494	0.0012269	0.0352384
c64147_g4	cyclin-U1-1	1.39613	10.4192	0.00124712	0.0352463
c73629_g1	hypothetical protein EUGRSUZ_D00811	2.11044	10.4196	0.00124686	0.0352463
c73968_g5	cellulose synthase A catalytic subunit 4	4.98899	10.4189	0.0012473	0.0352463
c80535_g5	nuclease HARBI1	0.447022	10.4221	0.00124513	0.0352463
c83911_g4	copia isoform X1	2.09166	10.4377	0.00123471	0.0352463
c86756_g4	hypothetical protein BVRB_5g117270	2.13326	10.4382	0.00123435	0.0352463
c90943_g2	Retrovirus-related Pol poly from transposon TNT 1-94///copia-type poly	0.444882	10.429	0.00124053	0.0352463
c91392_g1	P-hydroxybenzoic acid efflux pump subunit aaeB	1.50845	10.422	0.0012452	0.0352463
c92360_g1	O Chain The Dual Coenzyme Specificity Of Photosynthetic Glyceraldehyde-3- Phosphate Dehydrogenase Interpreted By The Crystal Structure Of A4 Isoform Complexed With Nad	7.403	10.4192	0.00124712	0.0352463
c94174_g2	transposon unclassified///gag-pol poly	0.464595	10.4326	0.00123808	0.0352463
c81592_g1	zinc finger ZAT8-like	3.14578	10.3853	0.00127019	0.0358376
c70918_g2	4-diphosphocytidyl-2-C-methyl-D-erythritol chloroplastic	6.01354	10.3818	0.00127265	0.0358513
c81701_g1	RING U-box superfamily	2.65615	10.3757	0.00127683	0.0359132
c88214_g2	---NA---	2.03636	10.3664	0.00128329	0.0360392
c70282_g4	fatty-acid-binding 2	3.91592	10.3571	0.0012898	0.03604
c73629_g6	hypothetical protein	1.99349	10.355	0.00129125	0.03604
c89437_g2	PREDICTED: uncharacterized protein LOC104894795	5.25411	10.3563	0.00129032	0.03604
c92988_g1	acylamino-acid-releasing enzyme-like///acylamino-acid-releasing enzyme isoform X2	5.69304	10.3562	0.00129039	0.03604
c85352_g1	aspartokinase chloroplastic isoform X1///Aspartate kinase 3 isoform 3///aspartokinase chloroplastic isoform X2///aspartokinase chloroplastic-like	6.86233	10.3382	0.00130303	0.0363129
c91562_g2	LRR receptor-like serine threonine- kinase ERL1	5.2631	10.3335	0.00130636	0.03635
c81397_g1	proteasome subunit beta type-5	8.08365	10.3108	0.00132252	0.0367435
c75161_g1	F-box LRR-repeat At4g14103-like	0.294405	10.3015	0.00132925	0.0368741
c92366_g3	4-coumarate-- ligase-like 7	6.67616	10.2826	0.00134294	0.037197
c80015_g5	gag-pol poly	-0.376632	10.2771	0.00134691	0.0372503
c82902_g1	RING FYVE PHD zinc finger superfamily isoform 1///PREDICTED: uncharacterized protein LOC104896612	1.13125	10.2643	0.00135628	0.0374523
c89069_g2	NAC domain-containing 72///NAC domain-containing 72-like	3.32501	10.2589	0.00136029	0.037506
c87934_g3	IQ-DOMAIN 14	3.43023	10.2394	0.00137471	0.0378461
c77573_g5	F-box SKIP23-like	1.8812	10.2067	0.00139932	0.0382341
c78493_g5	dehydration-responsive element-binding 3-like	0.128097	10.2116	0.00139559	0.0382341
c86578_g4	monothiol glutaredoxin-S1-like	1.5885	10.2111	0.00139596	0.0382341
c91312_g2	anthocyanidin 3-O-glucosyltransferase 2-like	1.54581	10.2166	0.00139182	0.0382341
c93917_g2	serine arginine-rich splicing factor RSZ22A	7.42033	10.2092	0.00139744	0.0382341
c71674_g1	RER1A-like	0.345219	10.1913	0.00141105	0.0383815
c76952_g3	SAFB-like transcription modulator	0.594294	10.1944	0.00140871	0.0383815
c86639_g4	GDSL esterase lipase At4g16230-like	1.67546	10.193	0.00140977	0.0383815
c76126_g3	Ribosomal L12 ATP-dependent Clp protease adaptor family isoform 2///citrate mitochondrial-like///citrate synthase mitochondrial	4.84669	10.1691	0.00142816	0.0387888
c87473_g3	squamosa promoter-binding 2///Squamosa promoter binding -like isoform 1	5.5277	10.1389	0.00145173	0.0393701
c79197_g2	Beta glucosidase isoform 3///beta-glucosidase 11-like isoform X2	5.21456	10.1289	0.0014596	0.0394974
c88357_g1	probable beta-1,3-galactosyltransferase 2	4.7941	10.1247	0.00146295	0.0394974
c90684_g1	potassium channel KAT1-like///potassium channel KAT3-like isoform X1	4.65507	10.1264	0.00146158	0.0394974
c93653_g1	ABC transporter C family member 3-like	0.743609	10.1169	0.00146918	0.0396067
c92477_g3	general negative regulator of transcription subunit 3 isoform X1	2.1555	10.0811	0.00149794	0.0403223
c71978_g1	VQ motif-containing 25-like	2.80198	10.0682	0.00150849	0.0405464
c84845_g2	PREDICTED: uncharacterized protein LOC104906040 isoform X1///---NA---	1.72453	10.0618	0.00151372	0.0406266
c88868_g1	phytoene chloroplastic chromoplastic	2.47202	10.0488	0.00152443	0.0408539
c79125_g11	uncharacterized SDCCAG3 family -like	6.01582	10.0397	0.001532	0.0409961
c94833_g1	serine threonine- kinase CCR4	5.07036	10.0321	0.00153837	0.0411062
c89369_g1	NRT1 PTR FAMILY -like	8.00784	10.0179	0.00155028	0.041303
c92655_g1	cytochrome P450 71D11-like	3.49027	10.0189	0.00154939	0.041303
c82184_g2	ribonuclease H At1g65750	1.56627	10.0114	0.00155571	0.0413265
c91531_g2	hypothetical protein	1.14271	10.0124	0.00155491	0.0413265
c45915_g1	PREDICTED: uncharacterized protein LOC104905839	1.55544	9.99997	0.00156543	0.0413499
c77037_g6	DNA polymerase delta subunit 3	5.22764	9.99965	0.0015657	0.0413499
c80899_g1	Metalloendo ase 1///metalloendo ase 1-like	0.483832	10.0046	0.00156147	0.0413499
c88013_g2	heat shock cognate 70 kDa -like	4.95303	10.004	0.00156197	0.0413499
c88260_g2	histone H2A-like	8.166	9.99582	0.00156896	0.0413758
c90023_g4	interactor of constitutive active ROPs chloroplastic isoform X1	5.14392	9.99133	0.00157279	0.0414168
c78494_g1	PREDICTED: uncharacterized protein LOC104897364	3.20209	9.96152	0.00159846	0.0419456
c83305_g1	hypothetical protein SOVF_091060 isoform A///PREDICTED: uncharacterized protein LOC100266128 isoform X1	3.4341	9.96302	0.00159716	0.0419456
c84617_g3	WD repeat-containing 44///WD repeat-containing YMR102C	3.14406	9.95998	0.0015998	0.0419456
c68986_g1	Amidohydrolase family expressed isoform 1	4.80962	9.95209	0.00160667	0.0420255
c89247_g3	hypothetical protein BVRB_4g085350///PREDICTED: uncharacterized protein LOC104891332	3.94084	9.95117	0.00160747	0.0420255
c72654_g10	acidic mammalian chitinase-like	2.46807	9.93877	0.00161833	0.0422487
c84328_g1	inositol transporter 4-like	3.77301	9.93353	0.00162295	0.0423084
c80308_g3	acyl- --sterol O-acyltransferase 1-like	-0.201246	9.93034	0.00162577	0.0423211
c69954_g1	---NA---	1.42196	9.92052	0.00163447	0.0424261
c77247_g3	GDSL esterase lipase At5g03610-like///GDSL esterase lipase	2.0345	9.9213	0.00163377	0.0424261
c86602_g4	PREDICTED: uncharacterized protein LOC104884250	2.64032	9.9145	0.00163981	0.0425041
c87655_g2	---NA---	8.00925	9.90009	0.0016527	0.0427773
c86305_g2	3-hydroxy-3-methylglutaryl-coenzyme A reductase 1 isoform 1///3-hydroxy-3-methylglutaryl-coenzyme A reductase 2	0.424208	9.89549	0.00165685	0.0428157
c93766_g7	DPH4 homolog	0.515766	9.89321	0.0016589	0.0428157
c88624_g1	PREDICTED: uncharacterized protein LOC104883979	1.29169	9.88799	0.00166361	0.0428764
c86348_g3	hypothetical protein BVRB_1g012810	1.30939	9.88101	0.00166993	0.0429783
c52094_g2	inactive leucine-rich repeat receptor kinase CORYNE	3.83543	9.85827	0.0016907	0.0433682
c77682_g4	vegetative cell wall gp1	0.897346	9.85659	0.00169224	0.0433682
c91342_g7	F-box LRR-repeat 23	3.49717	9.85755	0.00169136	0.0433682
c93281_g3	probable pectinesterase pectinesterase inhibitor 34	6.997	9.8512	0.00169721	0.0433991
c94777_g1	disease resistance RPP13 1	1.1425	9.8501	0.00169823	0.0433991
c93612_g3	transporter arsB	3.70745	9.84471	0.00170321	0.0434654
c80919_g7	probable E3 ubiquitin- ligase ARI8 isoform X2	1.2212	9.83793	0.00170949	0.0435645
c86550_g4	zerumbone synthase-like isoform X2///short-chain dehydrogenase reductase 2a-like///zerumbone synthase-like isoform X1///NAD(P)-binding Rossmann-fold superfamily	3.26755	9.83052	0.0017164	0.0436793
c87660_g6	disease resistance At4g27190-like isoform X1///disease resistance At4g27190-like	1.79271	9.81516	0.00173079	0.0439225
c95175_g1	retroelement pol poly -like	1.05166	9.81676	0.00172929	0.0439225
c91808_g1	probable methyltransferase PMT15	2.17175	9.81048	0.0017352	0.0439729
c79066_g6	PREDICTED: tetraspanin-6	3.47495	9.79745	0.00174754	0.0442239
c85805_g1	flavin-containing monooxygenase FMO GS-OX-like 5///flavin-containing monooxygenase FMO GS-OX5-like///flavin-containing monooxygenase FMO GS-OX-like 4///flavin-containing monooxygenase FMO GS-OX1	1.26903	9.79261	0.00175215	0.0442789
c71129_g10	retroelement pol poly -like///LTR retrotransposon like	1.81233	9.78703	0.00175747	0.0443518
c89913_g2	PREDICTED: uncharacterized protein LOC104905415	3.13375	9.77538	0.00176864	0.0445718
c74243_g7	mitochondrial isoform X1	0.731105	9.75794	0.0017855	0.0448995
c86279_g3	PCTP isoform X1	3.03911	9.75682	0.00178659	0.0448995
c55986_g1	pectinesterase pectinesterase inhibitor 28	1.46052	9.75375	0.00178957	0.0449122
c82946_g1	leucoanthocyanidin dioxygenase-like	5.16915	9.73977	0.00180324	0.0451929
c82245_g1	small heat shock chloroplastic-like	5.24261	9.73357	0.00180933	0.0452339
c92166_g2	60S ribosomal L24-2	8.47309	9.73304	0.00180985	0.0452339
c83408_g3	pectinesterase-like	1.88816	9.72995	0.00181289	0.0452476
c89994_g7	protease Do-like 14 isoform X1	4.12893	9.72366	0.00181911	0.0453405
c84652_g1	omega-hydroxypalmitate O-feruloyl transferase///omega-hydroxypalmitate O-feruloyl transferase-like	3.16603	9.70412	0.00183855	0.0457622
c81497_g1	peptidyl-prolyl cis-trans isomerase	3.48207	9.68349	0.00185931	0.0460742
c84227_g3	ACCUMULATION AND REPLICATION OF CHLOROPLASTS 3	4.52522	9.68199	0.00186083	0.0460742
c86945_g1	UDP-glucuronate:xylan alpha-glucuronosyltransferase 2 isoform X1	3.78314	9.6816	0.00186122	0.0460742
c92859_g1	D-xylose-proton symporter-like chloroplastic	6.29536	9.6881	0.00185465	0.0460742
c87407_g3	ribose-phosphate pyrophosphokinase 4	2.47278	9.6747	0.00186823	0.0461846
[truncated: 49 more rows]

## Sheet: DEGs_FI_FS_Vs._FI8
GENE	DESCRIPTION	V2	V3	logFC	logCPM	PVal	FDR
[truncated: 1,808 more rows]

[truncated: 45 more sheets: DEGs_FI_FS_Vs._FI9, DEGs_FI_FS_Vs._FI10, DEGs_FI_Vs._FU, DEGs_FI9_Vs._FI8, DEGs_FI9_Vs._FU9, DEGs_FI9andFI10_vs_FU9_10, DEGs_FI10_vs_FI8, DEGs_FI10_vs_FI9, DEGs_FI10_vs_FU10, DEGs_FILate_vs_FI_8, DEGs_FILate_vs_FI_9, DEGs_FILate_vs_FI_10, DEGs_FILate_vs_FI_FS, DEGs_MaleAndFemaleInfected10_vs, DEGs_MI_FS_vs_FI_FS, DEGs_MI_FS_vs_MI8, DEGs_MI_FS_vs_MI9, DEGs_MI_FS_vs_MI10, DEGs_MI_FS_vs_MU_FS, DEGs_MI8_9_FS_Late_vs_MU8_9_FS …]
